# Supplementary material for: Number of People Blind or Visually Impaired by Glaucoma Worldwide and in World Regions 1990 – 2010: A Meta-Analysis
Source: PubMed Central journal article supplement (PMC5072735; doi:10.1371/journal.pone.0162229), 2016-10-20

## Text A. Definitions and analytic framework

We aim to calculate the prevalence of mild distance vision loss, severe distance vision loss, and distance blindness, by age, sex and year for the period 1990-2010 in 190 countries (Table A). We define the following *extended* vision loss categories:

- Blind:  $< 3/60$  and/or a visual field of no greater than 10 in radius around central fixation
- Severe vision loss:  $< 6/60$  and  $\geq 3/60$
- Moderate vision loss:  $< 6/18$  and  $\geq 6/60$
- Mild vision loss:  $< 6/60$  and  $\geq 6/18$

Studies that report severe, moderate, and mild vision loss were sparse compared to studies that report the prevalence of blindness and/or severe and moderate vision loss combined (MSVI). At the same time, the prevalence of severe, moderate and mild vision loss are highly correlated with MSVI. We therefore chose to create models for two *core* levels of visual impairment:

- Blind:  $< 3/60$  and/or a visual field of no greater than 10 in radius around central fixation
- MSVI:  $< 6/18$  and  $\geq 3/60$

Our study was carried out in five steps:

- Data identification and access (Text B)
- Conversion of vision impairment data to two core severity levels for modeling, blindness and MSVI (Text C)
- Application of an age pattern to data which are not presented by age (Text D)
- Development of a hierarchical model to estimate prevalence of two core levels of vision impairment (Text E)
- Conversion of vision impairment data from two core levels to four extended severity levels (Text F)

## Text B. Data identification and access

We used data from epidemiologic studies and surveys identified in a previously published systematic review<sup>1</sup>. Bourne *et al.* identified studies or surveys fulfilling the following inclusion criteria:

- The studies reported prevalence of visual impairment from cross-sectional surveys of representative populations of a country or area of a country. Studies that targetted high-prevalence areas, such as trachoma or onchocerciasis-endemic villages, were excluded.
- The definitions of visual impairment were clearly stated, using thresholds of visual acuity in the better eye that matched the extended definitions of visual impairment.
- Best corrected and/or presenting visual acuity was given.
- The procedures used for measurement of visual acuity were clearly stated.

The authors carried out a systematic review of the literature. They also obtained unpublished data sources. In total, they identified 243 studies or surveys fulfilling their inclusion criteria. We excluded 1 study because it measured only near vision impairment; 3 studies because they only measured incidence of distance vision impairment; 7 studies because they did not report all-cause vision impairment; and 1 study from Cook Islands because covariate data were not available. Finally, we excluded 4 studies because they only reported visual acuity levels which we did not map to our core visual acuity levels (see section 3 for further details). Thus, we used data from 227 studies; 216 reported or could be used to estimate the prevalence of blindness and 192 reported or could be used to estimate the prevalence of MSVI. Data used in this analysis are listed in Table B.

## Text C. Methods for comparability of vision impairment definition

Not all prevalence data reported in the literature use the definitions of visual impairment selected for this analysis. To include data calculated using other definitions of visual impairment, we developed statistical models to convert the prevalence of visual impairment using other severity thresholds to the thresholds used in this analysis.

Our aim is thus to convert all prevalence data reported in studies to our core levels of visual impairment, blindness and MSVI. We first pooled all study data reporting visual impairment using multiple definitions. We then fit four logistic regressions to convert data using alternative definitions of visual impairment to our core definitions, as follows:

Definitions of blindness ( $P_X$ ) converted to our core definition of blindness ( $P_Y$ ;  $< 3/60$ ):

- $< 6/60$  (see Figure A)
- $\leq 6/60$  (see Figure B)

Definitions of visual impairment ( $P_X$ ) converted to our core definition of visual impairment ( $P_Y; < 6/18 \ \& \ \geq 3/60$ ):

- $< 6/18$  (see Figure C)
- $< 6/12$  (see Figure D)

Each equation had the following form:

$$\text{logit}(P_Y) = \beta \cdot \text{logit}(P_X) + \alpha$$

Fitted regression coefficients are reported in Table C. The converted data (blind and MSVI) are then used in the models to predict the prevalence of vision impairment by country, age, sex, and year.

## Text D. Methods for comparability of data aggregated by age

Vision loss has a strong age pattern; because of this, using the midpoint on wide-age data may be inappropriate. To allow data with wide age-ranges to be included in the model we imputed narrow-age prevalences and then used those to model vision impairment by country, year, age and sex. We first found a universal age pattern and then applied it to the wide age-range data, which allowed us to split the wide age-range data into five-year age groups. We began by modeling all of the narrow age-range data (five-year-or-less age range). We use the following notation:

- observations are denoted  $o$  and indexed by  $h$ .
- studies are denoted  $st$  and indexed by  $i$ .

We fit a logistic regression using the *lmer* function in *R*. We fit a universal age pattern using an age spline and study-specific random effects  $a$  as follows, with  $p_h$  equal to the prevalence of visual impairment underlying age-specific observation  $h$ :

$$\begin{aligned} y_h &\sim \text{Binom}(n_h, p_h) \\ p_h &= \text{logit}^{-1} \left( a_{i[h]}^{st} + X_h \beta \right). \end{aligned}$$

The  $\beta$  covariates represent a linear spline for age with knots at 40 and 70 years old. Then, for each wide age-range datapoint we created appropriate sets of 5-year age-ranges. With each corresponding set of 5-year age-range data we performed a grid-search to find an appropriate study-offet that allowed the population weighted 5-year age-range data estimate to be the same as its corresponding wide age-range datapoint. Once this had been performed for all wide age-range datapoints, the 5-year age-range estimates were substituted for their wide age-range counterparts.

## Text E. Methods for calculating prevalence of visual impairment by country, year, age, and sex

We fit two hierarchical mixed-model logistic regressions using the *R* function *lmer* to separately estimate the prevalence of blindness and MSVI in each country-age group<sup>2,3</sup>. For observation  $o$  indexed by  $h$ , we define  $y_h$  to be the number of subjects with visual impairment out of a total sample size  $n_h$ . Our model includes a 5-level hierarchy, denoted  $a$ :

- 216 (blind model) or 192 (MSVI model) studies are denoted  $st$  and indexed by  $i$ .
- 184 countries are denoted  $c$  and indexed by  $j$ .
- 21 subregions are denoted  $sb$  and indexed by  $k$ .
- 4 regions are denoted  $r$  and indexed by  $l$ .
- Global-level effects are denoted  $g$ .

Our regression is as follows, with  $p_h$  equal to the prevalence of visual impairment underlying observation  $h$ :

$$\begin{aligned} y_h &\sim \text{Binom}(n_h, p_h) \\ p_h &= \text{logit}^{-1} \left( a^g + a_{l[h]}^r + a_{k[h]}^{sb} + a_{j[h]}^c + a_{i[h]}^{st} + b_{l[h]}^r \text{sex}_h + c_{l[h]}^r \text{year}_{i[h]} + X_h \beta \right). \end{aligned}$$

Where  $b_l^r$  and  $c_l^r$  are region-specific sex and linear year random slopes, respectively.

Study-specific random effects allow for additional variability in studies not explained by sampling uncertainty. The variance of the study-specific random effects depends on whether the study is national or subnational, so:

$$\sigma_{st,i} = \begin{cases} \sigma^{\text{nat'l}} & \text{if study } i \text{ is nationally representative} \\ \sigma^{\text{subnat'l}} & \text{otherwise.} \end{cases}$$

This allows the model estimates to track more closely to national studies than subnational/community studies.

Covariates represent characteristics of the data at the observation, study, and country levels. The observation-specific characteristics are age category, denoted by a three-piece linear spline  $z^{0+}, z^{1+}, z^{2+}$  (with spline knots at age 40 and age 70), and an indicator variable for when presenting (vs. best-corrected) vision was measured (*pres*). Because the ratio of presenting and best-corrected vision impairment was significantly larger in South Asia, we fit a separate presenting offset for South Asia (*presSA*). The blind model study-level covariates are an offset for studies that are rural-only, and an offset for studies that are urban-only. There were no study-level covariates for the MSVI model: rural-only and urban-only offsets were not significant and had little effect on the model outcome, and were therefore excluded to maintain a parsimonious model. Country-level covariates were selected using cross-validation, as described in the main text. The country-level covariates for both models are mean years of education and measure of health access.

All together, the covariates for the blind model are:

$$X_h\beta = \beta_0 z_h^{0+} + \beta_1 z_h^{1+} + \beta_2 z_h^{2+} + \beta_3 \text{presSA}_h + \beta_4 \text{pres}_h + \beta_5 \text{rural}_{i[h]} + \beta_6 \text{urban}_{i[h]} + \beta_7 \text{health\_access}_{j[h]} + \beta_8 \text{educ}_{j[h]}$$

The covariates for the MSVI model are:

$$X_h\beta = \beta_0 z_h^{0+} + \beta_1 z_h^{1+} + \beta_2 z_h^{2+} + \beta_3 \text{presSA}_h + \beta_4 \text{pres}_h + \beta_7 \text{health\_access}_{j[h]} + \beta_8 \text{educ}_{j[h]}$$

To predict the prevalence of blindness and MSVI for each country-year-age unit, we use global, regional, subregional and country random effects, and regional sex and year random slopes. Study effects ( $a_i^{st}$ ) are excluded when making predictions, and the urban and rural fixed effects ( $\text{rural}_i$  and  $\text{urban}_i$ ) are set to zero. To predict presenting vision impairment, we set the *pres* indicator variable to one and the *presSA* indicator variable to one for the South Asian region and zero for all other regions. We also predict best-corrected vision impairment, setting both presenting indicator variables to zero (results not shown). Thus, we use the following equation to make predictions for each country-year-age unit:

$$p_h = \text{logit}^{-1}(a^g + a_{l[j]}^r + a_{k[j]}^{sb} + a_j^c + b_{l[j]}^r \text{sex} + c_{l[j]}^r \text{year} + \beta_0 z^{0+} + \beta_1 z^{1+} + \beta_2 z^{2+} + \beta_3 \text{presSA} + \beta_4 \text{pres} + \beta_7 \text{health\_access}_j + \beta_8 \text{educ}_j)$$

We predict the central estimates of blindness and MSVI prevalence by fitting the model to the full study dataset. We generated uncertainty using a bootstrap procedure. For each model, we drew *st* studies with replacement, creating 500 bootstrap samples comprising *st* studies. We then fitted each model 500 times, once for each bootstrap dataset, and extracted the model coefficients. For countries with no data in the bootstrap sample, and thus without an estimate of the country-specific random effect, we randomly drew a country-specific effect by sampling from a Normal distribution with mean zero and standard deviation calculated from the fitted country random effects for that model. We then generated 500 draws comprising predictions for each country/year/sex combination as described above; these draws represent the vision impairment envelope's uncertainty distribution. In a few bootstrap iterations among age groups >80 years, our estimates of the prevalence of blindness and MSVI sum to more than 100%. For each draw we normalize blind and MSVI estimates to sum to 100%. For each bootstrap sample, another draw is saved with the presenting variables set to zero; the difference between these two draws constitutes vision impairment attributable to refractive error (not presented in this publication).

Finally, we predict the prevalence of severe, moderate, and mild visual impairment using the predicted prevalences of blindness and MSVI, reversing the procedure described in Text C. Using the all survey data which reported multiple definitions of visual impairment described in Text C, we fit logistic regressions to predict the proportion of MSVI that is moderate visual impairment, and the proportion of mild and no visual impairment that is mild visual impairment. We fit the following equations (see Figures E, F, and G):

$$\text{logit} \left( \frac{\text{Prev(moderate)}}{\text{Prev(MSVI)}} \right) = \beta_0 + \beta_1 \text{logit}(\text{Prev(MSVI)}) + \beta_2 \text{logit}(\text{Prev(blind)})$$

$$\text{logit} \left( \frac{\text{Prev(mild)}}{1 - \text{Prev(blind)} - \text{Prev(MSVI)}} \right) = \beta_0 + \beta_1 \text{logit}(\text{Prev(MSVI)}) + \beta_2 \text{logit}(\text{Prev(blind)})$$

For the central estimate and for each bootstrap draw generated as described above, we predict the prevalence of severe, moderate, and mild visual impairment (*e.g.*, 501 values per age-sex-country-year unit). In order to propagate uncertainty, for the bootstrap draws, we predict each of these levels of vision impairment by sampling from the regression coefficients and error terms.

We present uncertainty intervals in summary estimates as the 2.5-97.5 percentiles of the distribution of draws, and the central estimate as the predictions from the model fitted with all study data. We also calculate trends in visual impairment and its uncertainty by creating (for each draw and for the central estimate) age-standardized total vision impairment estimates for all-ages and for ages 50 years and greater, for 1990 and 2010 and for all countries, regions, and the world. We then calculate the difference between the 1990 and 2010 prevalences, by draw and for the central estimate. We present the 2.5th percentile and 97.5th percentile of the difference from the draws as the upper and lower confidence intervals, respectively, for the time trend.

## References

1. R. Bourne, H. Price, and H. Taylor. The global burden of disease project: Rationale and methodology of the systematic review by the vision loss group. *Ophthalmic Epidemiology*, X(X):XX, 2012.
2. R Core Team. *R: A Language and Environment for Statistical Computing*. R Foundation for Statistical Computing, Vienna, Austria, 2012. URL <http://www.R-project.org>. ISBN 3-900051-07-0.
3. Douglas Bates, Martin Maechler, and Ben Bolker. *lme4: Linear mixed-effects models using Eigen and Eigen*, 2011. URL <http://CRAN.R-project.org/package=lme4>. R package version 0.999375-42.

Table A. Countries and territories in analysis regions.

| Subregion                        | Countries                                                                                                                                                                                                                                          |
|----------------------------------|----------------------------------------------------------------------------------------------------------------------------------------------------------------------------------------------------------------------------------------------------|
| <b>High-income region</b>        |                                                                                                                                                                                                                                                    |
| Asia-Pacific, high income        | Brunei Darussalam, Japan, Republic of Korea, Singapore                                                                                                                                                                                             |
| Australasia                      | Australia, New Zealand                                                                                                                                                                                                                             |
| North America, high income       | Canada, United States of America                                                                                                                                                                                                                   |
| Western Europe                   | Andorra, Austria, Belgium, Cyprus, Denmark, Finland, France, Germany, Greece, Iceland, Ireland, Israel, Italy, Luxembourg, Malta, Netherlands, Norway, Portugal, Spain, Sweden, Switzerland, United Kingdom                                        |
| <b>South Asia region</b>         |                                                                                                                                                                                                                                                    |
| South Asia                       | Afghanistan, Bangladesh, Bhutan, India, Nepal, Pakistan                                                                                                                                                                                            |
| <b>Sub-Saharan Africa region</b> |                                                                                                                                                                                                                                                    |
| Central Africa                   | Angola, Central African Republic, Congo, Democratic Republic of the Congo, Equatorial Guinea, Gabon                                                                                                                                                |
| East Africa                      | Burundi, Comoros, Djibouti, Eritrea, Ethiopia, Kenya, Madagascar, Malawi, Mauritius, Mozambique, Rwanda, Seychelles, Somalia, Sudan, Uganda, United Republic of Tanzania, Zambia                                                                   |
| Southern Africa                  | Botswana, Lesotho, Namibia, South Africa, Swaziland, Zimbabwe                                                                                                                                                                                      |
| West Africa                      | Benin, Burkina Faso, Cameroon, Cape Verde, Chad, Côte d'Ivoire, Gambia, Ghana, Guinea, Guinea-Bissau, Liberia, Mali, Mauritania, Niger, Nigeria, Senegal, Sierra Leone, São Tomé and Príncipe, Togo                                                |
| <b>Other regions</b>             |                                                                                                                                                                                                                                                    |
| Central Asia                     | Armenia, Azerbaijan, Georgia, Kazakhstan, Kyrgyzstan, Mongolia, Tajikistan, Turkmenistan, Uzbekistan                                                                                                                                               |
| East Asia                        | China, Hong Kong SAR (China), Macau SAR (China), Democratic People's Republic of Korea, Taiwan                                                                                                                                                     |
| Southeast Asia                   | Cambodia, Indonesia, Lao People's Democratic Republic, Malaysia, Maldives, Myanmar, Philippines, Sri Lanka, Thailand, Timor-Leste, Viet Nam                                                                                                        |
| Oceania                          | Fiji, Kiribati, Marshall Islands, Micronesia (Federated States of), Papua New Guinea, Samoa, Solomon Islands, Tonga, Vanuatu                                                                                                                       |
| Central Europe                   | Albania, Bosnia and Herzegovina, Bulgaria, Croatia, Czech Republic, Hungary, Montenegro, Poland, Romania, Serbia, Slovakia, Slovenia, Macedonia (Former Yugoslav Republic of)                                                                      |
| Eastern Europe                   | Belarus, Estonia, Latvia, Lithuania, Moldova, Russian Federation, Ukraine                                                                                                                                                                          |
| Andean Latin America             | Bolivia, Ecuador, Peru                                                                                                                                                                                                                             |
| Central Latin America            | Colombia, Costa Rica, El Salvador, Guatemala, Honduras, Mexico, Nicaragua, Panama, Venezuela (Bolivarian Republic of)                                                                                                                              |
| Southern Latin America           | Argentina, Chile, Uruguay                                                                                                                                                                                                                          |
| Tropical Latin America           | Brazil, Paraguay                                                                                                                                                                                                                                   |
| Caribbean                        | Antigua and Barbuda, Bahamas, Barbados, Belize, Cuba, Dominica, Dominican Republic, Grenada, Guyana, Haiti, Jamaica, Puerto Rico, Saint Lucia, Saint Vincent and the Grenadines, Suriname, Trinidad and Tobago                                     |
| North Africa and Middle East     | Algeria, Bahrain, Egypt, Iran (Islamic Republic of), Iraq, Jordan, Kuwait, Lebanon, Libyan Arab Jamahiriya, Morocco, Occupied Palestinian Territory, Oman, Qatar, Saudi Arabia, Syrian Arab Republic, Tunisia, Turkey, United Arab Emirates, Yemen |

**Table B. Characteristics of data sources used in the analysis.**

| GBD Region                | Country            | Coverage    | Years (NS = not specified) | Age range | Total examined | Urban / rural | Rapid | Presenting or best-corrected | Core visual acuity levels used | Reference                                                                                                                                                                                                                                         |
|---------------------------|--------------------|-------------|----------------------------|-----------|----------------|---------------|-------|------------------------------|--------------------------------|---------------------------------------------------------------------------------------------------------------------------------------------------------------------------------------------------------------------------------------------------|
| Andean Latin America      | Ecuador            | national    | 2009                       | 50-99     | 4012           | both          | Yes   | Both                         | blind, low vision              | Felipe Chiriboga, RAAB in Ecuador (2009) unpublished                                                                                                                                                                                              |
| Andean Latin America      | Peru               | local       | 2002                       | 50-99     | 4782           | rural         | Yes   | Both                         | blind, low vision              | Pongo Aguilu, L., R. Carrion, et al. (2005). Cataract blindness in people 50 years old or older in a semirural area of northern Peru. [Spanish]. Revista Panamericana de Salud Publica/Pan American Journal of Public Health 17(5-6): 387-393.    |
| Andean Latin America      | Peru               | national    | 2011                       | 50-99     | 4852           | both          | Yes   | Both                         | blind, low vision              | PERU RAPID DATA                                                                                                                                                                                                                                   |
| Asia-Pacific, high-income | Japan              | local       | 1997-2000                  | 40-79     | 2263           | urban         | No    | Best-corrected               | blind, low vision              | Iwano, M., H. Nomura, et al. (2004). Visual Acuity in a Community-dwelling Japanese Population and Factors Associated with Visual Impairment. Japanese Journal of Ophthalmology 48(1): 37-43.                                                     |
| Asia-Pacific, high-income | Japan              | local       | 2000-2001                  | 40-99     | 2977           | urban         | No    | Best-corrected               | blind, low vision              | Iwase, A., M. Araie, et al. (2006). Prevalence and causes of low vision and blindness in a Japanese adult population: the Tajimi Study. Ophthalmology 113(8): 1354-62.                                                                            |
| Asia-Pacific, high-income | Japan              | local       | 2005-2006                  | 40-99     | 3762           | rural         | No    | Presenting                   | blind, low vision              | Nakamura Y, Tomidokoro A, Sawaguchi S, Sakai H, Iwase A, Araie M. Prevalence and causes of low vision and blindness in a rural Southwest Island of Japan: the Kumejima study. Ophthalmology. 2010 Dec;117(12):2315-21                             |
| Asia-Pacific, high-income | Singapore          | local       | 1997-1998                  | 40-79     | 1152           | urban         | No    | Best-corrected               | blind, low vision              | Saw, S. M., P. J. Foster, et al. (2004). Causes of blindness, low vision, and questionnaire-assessed poor visual function in Singaporean Chinese adults: The Tanjong Pagar Survey. Ophthalmology 111(6): 1161-8.                                  |
| Asia-Pacific, high-income | Singapore          | subnational | NS                         | 3-6       | 3009           | urban         | No    | Presenting                   | low vision                     | Dirani M, Zhou B, Hornbeak D, Chang BC, Gazzard G, Chia A, Ling Y, Selvaraj P, Young TL, Varma R, Wong TY, Saw SM. Prevalence and causes of decreased visual acuity in Singaporean Chinese preschoolers. Br J Ophthalmol. 2010 Dec;94(12):1561-5. |
| Australasia               | Australia          | local       | 1992                       | 70-99     | 1446           | urban         | No    | Best-corrected               | blind, low vision              | Casson R, Giles L, Newland HS. Prevalence of blindness and visual impairment in an elderly urban population. Aust N Z J Ophthalmol. 1996 Aug;24(3):239-43.                                                                                        |
| Australasia               | Australia          | local       | 1992-1994                  | 49-99     | 3650           | urban         | No    | Both                         | blind, low vision              | Blue Mountains Sydney Microdata                                                                                                                                                                                                                   |
| Australasia               | Australia          | local       | 1992-1996                  | 40-99     | 4386           | urban         | No    | Both                         | blind, low vision              | Weih LM, VanNewkirk MR, McCarty CA, Taylor HR. Age-specific causes of bilateral visual impairment. Archives of Ophthalmology 2000; 118(2): 264-9.                                                                                                 |
| Australasia               | Australia          | local       | 1997-1999                  | 50-99     | 2614           | urban         | No    | Both                         | low vision                     | Foran S, Rose K, Wang JJ, Mitchell P. Correctable visual impairment in an older population: The Blue Mountains Eye Study. American Journal of Ophthalmology 2002; 134(5): 712-9.                                                                  |
| Australasia               | Australia          | local       | 2003-2005                  | 5-8       | 1738           | urban         | No    | Both                         | blind                          | Robaei D, Rose K, Ojaimi E, et al. Visual acuity and the causes of visual loss in a population-based sample of 6-year-old Australian children. 2005 JOphthalmology; 112(7): 1275-82                                                               |
| Australasia               | Australia          | local       | 2004-2005                  | 12        | 2353           | urban         | No    | Both                         | blind, low vision              | Robaei D, Huynh SC, Kifley A, Mitchell P. Correctable and Non-Correctable Visual Impairment in a Population-Based Sample of 12-Year-Old Australian Children. 2006; 142(1): 112-8.e1.                                                              |
| Australasia               | Australia          | subnational | 2007-2009                  | 4-6       | 1188           | urban         | No    | Presenting                   | low vision                     | Pai AS, Wang JJ, Samarawickrama C, Burlutsky G, Rose KA, Varma R, Wong TY, Mitchell P. Prevalence and risk factors for visual impairment in preschool children the sydney paediatric eye disease study. Ophthalmology. 2011 Aug;118(8):1495-500.  |
| Caribbean                 | Barbados           | national    | 1988-1992                  | 40-99     | 4068           | both          | No    | Best-corrected               | blind, low vision              | Hyman, L., S. Y. Wu, et al. (2001). Prevalence and causes of visual impairment in The Barbados Eye Study.[see comment]. Ophthalmology 108(10): 1751-6                                                                                             |
| Caribbean                 | Cuba               | local       | 2005                       | 50-99     | 2716           | urban         | Yes   | Both                         | blind, low vision              | Juan R. Hernández Silva, Marcelino Río Torres y Carmen Ma. Padilla González Resultados del RACSS en Ciudad de La Habana, Cuba, 2005 Rev Cubana Oftalmol 2006;19(1)                                                                                |
| Caribbean                 | Dominican Republic | national    | 2008                       | 50-99     | 3873           | both          | Yes   | Both                         | blind, low vision              | Diaz, Evelyn Garcia (2008) RAAB Dominican Republic, Unpublished                                                                                                                                                                                   |
| Central Africa            | Congo              | national    | 1988                       | 0-99      | 6185           | both          | No    | Best-corrected               | blind, low vision              | Annon Weekly Epidemiological Record, 1990:65:249-256 (N°33)                                                                                                                                                                                       |
| Central Asia              | Mongolia           | subnational | 1991-1992                  | 40-99     | 4345           | both          | No    | Both                         | blind                          | Baasanhu J, Johnson G J, Burendei G, Minassian D C : Prevalence and causes of blindness and visual impairment in Mongolia: a survey of populations aged 40 years and older. 1994. Bulletin of the World Health Organization. 72(5), 771-776       |
| Central Asia              | Mongolia           | subnational | 1995                       | 40-87     | 942            | both          | No    | Presenting                   | blind                          | Foster P J, Baasanhu J, Alsbirk P H, Munkhbayar D, Uranchimeg D, Johnson G J, : Glaucoma in Mongolia. A Population-Based Survey in Hovsgol Province, Northern Mongolia. 1996. Arch Ophthalmol. 114, 1235-1241                                     |
| Central Asia              | Turkmenistan       | national    | 2000-2001                  | 50-99     | 6011           | both          | Yes   | Presenting                   | blind, low vision              | Amansakhatov S, Volokhovskaya Z P, Afanas'yeva A N, Limburg H: Cataract blindness in Turkmenistan: results of a national survey. 2002. British Journal of Ophthalmology. 86, 1207-1210                                                            |

| GBD Region            | Country                            | Coverage    | Years (NS = not specified) | Age range | Total examined | Urban / rural | Rapid | Presenting or best-corrected | Core visual acuity levels used | Reference                                                                                                                                                                                                                                                                                                                                                                                                                                                                                               |
|-----------------------|------------------------------------|-------------|----------------------------|-----------|----------------|---------------|-------|------------------------------|--------------------------------|---------------------------------------------------------------------------------------------------------------------------------------------------------------------------------------------------------------------------------------------------------------------------------------------------------------------------------------------------------------------------------------------------------------------------------------------------------------------------------------------------------|
| Central Europe        | Bulgaria                           | local       | 1993                       | 50-99     | 6173           | both          | No    | Presenting                   | blind, low vision              | Vassileva, P., S. C. Gieser, et al. (1996). Blindness and visual impairment in western Bulgaria. Ophthalmic Epidemiology 3, 143-9.                                                                                                                                                                                                                                                                                                                                                                      |
| Central Latin America | El Salvador                        | national    | 2011                       | 50-99     | 3399           | both          | Yes   | Both                         | blind, low vision              | EL SALVADOR RAPID DATA                                                                                                                                                                                                                                                                                                                                                                                                                                                                                  |
| Central Latin America | Guatemala                          | subnational | 2004                       | 50-99     | 4806           | both          | Yes   | Both                         | blind, low vision              | Beltranena F, Casasola K, Silva JC, Limburg H. Cataract blindness in 4 regions in Guatemala: results of a population-based survey. Ophthalmology. 2007;114(8):1558-63. Pedro Gomez cited in Limburg et al. Cataract in Latin America Rev Panam Salud Publica/Pan Am J Public Health 25(5), 2009                                                                                                                                                                                                         |
| Central Latin America | Mexico                             | subnational | 2005-2006                  | 50-99     | 3764           | both          | Yes   | Both                         | blind, low vision              |                                                                                                                                                                                                                                                                                                                                                                                                                                                                                                         |
| Central Latin America | Mexico                             | subnational | 2010                       | 50-99     | 2864           | both          | Yes   | Both                         | blind, low vision              | Sarah Polack RAAB in Chiapas, Mexico (2010) unpublished                                                                                                                                                                                                                                                                                                                                                                                                                                                 |
| Central Latin America | Venezuela (Bolivarian Republic of) | national    | 2005                       | 50-99     |                | both          | Yes   | Presenting                   | blind, low vision              | Sisi F. Results of rapid assessment of cataract surgical services, national survey. 2004. Fundacion Venezolana para la prevencion de la ceguera. unpublished report                                                                                                                                                                                                                                                                                                                                     |
| East Africa           | Eritrea                            | national    | 2008                       | 50-99     | 3163           | both          | Yes   | Both                         | blind, low vision              | Andreas Mueller, RAAB in Eritrea (2008) unpublished                                                                                                                                                                                                                                                                                                                                                                                                                                                     |
| East Africa           | Ethiopia                           | subnational | NS                         | 7-99      | 11441          | both          | No    | Presenting                   | blind, low vision              | Cerulli, L., C. Cedrone, et al. (1984). Assessment of visual status of the population in seven regions of Ethiopia. Revue Internationale du Trachome et de Pathologie Oculaire Tropicale et Subtropicale et de Sante Publique(2-4): 127-42. Zerihun 1997 Blindness and low vision in Jimma zone, Ethiopia: results of a population based survey Ophthalmic Epidemiology p19-25                                                                                                                          |
| East Africa           | Ethiopia                           | local       | 1994-1995                  | 0-99      | 7423           | both          | No    | Presenting                   | blind, low vision              |                                                                                                                                                                                                                                                                                                                                                                                                                                                                                                         |
| East Africa           | Ethiopia                           | local       | NS                         | 40-99     | 2639           | rural         | No    | Presenting                   | blind, low vision              | Melese 2003 Low vision and blindness in adults in Gurage zone, Central Ethiopia Br J Ophth p677-680 National survey on blindness, low vision and trachoma in Ethiopia. Federal MOH of Ethiopia, The Carter Center, CBM, ITI, ORBIS Int. Ethiopia and LW, Ophthalmol Society of Ethiopia, Ethiopian Public Health Association. Addis Ababa, Ethiopia 2006.                                                                                                                                               |
| East Africa           | Ethiopia                           | national    | 2005-2006                  | 0-99      |                | both          | No    | Presenting                   | blind, low vision              |                                                                                                                                                                                                                                                                                                                                                                                                                                                                                                         |
| East Africa           | Ethiopia                           | subnational | 2009                       | 0-16      | 58480          | both          | No    | Presenting                   | blind                          | Demissie BS, Solomon AW. Magnitude and causes of childhood blindness and severe visual impairment in Sekoru District, Southwest Ethiopia: a survey using the key informant method. Trans R Soc Trop Med Hyg. 2011 Sep;105(9):507-11. Whitfield 1990 Blindness and eye disease in Kenya; ocular status survey results from the Kenya Rural Blindness Prevention Project Br J Ophth p333-344 Ndegwa 2006 Prevalence of visual impairment and blindness in a Nairobi urban population Ophthalmology p69-72 |
| East Africa           | Kenya                              | local       | NS                         | 0-99      |                | rural         | No    | Presenting                   | blind, low vision              |                                                                                                                                                                                                                                                                                                                                                                                                                                                                                                         |
| East Africa           | Kenya                              | local       | 2002-2003                  | 0-89      |                | urban         | No    | Presenting                   | blind, low vision              |                                                                                                                                                                                                                                                                                                                                                                                                                                                                                                         |
| East Africa           | Kenya                              | local       | 2005                       | 50-99     | 3503           | both          | Yes   | Presenting                   | blind, low vision              | Mathenge 2007 Rapid assessment of avoidable blindness in Nakuru district Kenya (Kenya -Nukuru RAAB) Ophthalmology p 599-605                                                                                                                                                                                                                                                                                                                                                                             |
| East Africa           | Kenya                              | local       | 2007                       | 50-99     | 3376           | rural         | Yes   | Presenting                   | blind, low vision              | Karimurio, Sheila, Gichangi, Adala and Huguet 2008 Rapid Assessment of Cataract Surgical Services in Embu District Kenya, East African Journal of Ophthalmology 13 p 19-25                                                                                                                                                                                                                                                                                                                              |
| East Africa           | Malawi                             | local       | 1983                       | 6-99      | 1664           | rural         | No    | Best-corrected               | blind, low vision              | Chirambo 1986 Blindness and visual impairment in southern Malawi Bulletin of the WHO p567-577 Kalua K, Lindfield R, Mtupanyama M, Mtumodzi D, Msiska V. Findings from a rapid assessment of avoidable blindness (RAAB) in Southern Malawi. PLoS One. 2011 Apr 25;6(4):e19226.                                                                                                                                                                                                                           |
| East Africa           | Malawi                             | local       | 2009-2010                  | 50-99     | 3583           | rural         | Yes   | Presenting                   | blind, low vision              | Mathenge 2007 Rapid assessment of avoidable blindness in Western Rwanda; Blindness in a postconflict setting PLoS Medicine p1187-1193                                                                                                                                                                                                                                                                                                                                                                   |
| East Africa           | Rwanda                             | subnational | 2006                       | 50-99     | 2206           | both          | Yes   | Presenting                   | blind, low vision              |                                                                                                                                                                                                                                                                                                                                                                                                                                                                                                         |
| East Africa           | Sudan                              | local       | 2005                       | 5-99      | 2499           | rural         | No    | Presenting                   | blind, low vision              | Ngondi 2006 Prevalence and causes of blindness and low vision in Southern Sudan PLoS Medicine p2416-2426 Mbulaiteye 2002 Evaluation of E optotypes as a screening test and the prevalence and causes of visual loss in a rural population of SW Uganda. Ophthalmic Epidemiology p251-262                                                                                                                                                                                                                |
| East Africa           | Uganda                             | local       | NS                         | 13-99     | 4076           | rural         | No    | Presenting                   | blind, low vision              | Uganda 2007 RACCS unpublished report, no authors, Masaka                                                                                                                                                                                                                                                                                                                                                                                                                                                |
| East Africa           | Uganda                             | local       | 2007                       | 50-99     |                | both          | Yes   | Presenting                   | blind, low vision              |                                                                                                                                                                                                                                                                                                                                                                                                                                                                                                         |
| East Africa           | United Republic of Tanzania        | local       | 1986                       | 7-99      | 1827           | rural         | No    | Best-corrected               | blind, low vision              | Rapoza 1991 Prevalence and causes of vision loss in central Tanzania International Ophthalmology p 123-9                                                                                                                                                                                                                                                                                                                                                                                                |
| East Africa           | United Republic of Tanzania        | subnational | 2007                       | 50-99     |                | both          | Yes   | Presenting                   | blind, low vision              | name(?) Rapid Assessment of avoidable blindness in Zanzibar. Submitted for MSc Community Eye Health at the London School of Hygiene and Tropical Medicine. 2007                                                                                                                                                                                                                                                                                                                                         |



| GBD Region  | Country                     | Coverage    | Years (NS = not specified) | Age range | Total examined | Urban / rural | Rapid | Presenting or best-corrected | Core visual acuity levels used | Reference                                                                                                                                                                                                                                           |
|-------------|-----------------------------|-------------|----------------------------|-----------|----------------|---------------|-------|------------------------------|--------------------------------|-----------------------------------------------------------------------------------------------------------------------------------------------------------------------------------------------------------------------------------------------------|
| East Africa | United Republic of Tanzania | local       | 2007                       | 50-99     |                | both          | Yes   | Presenting                   | blind, low vision              | Tanzania 2007 - RACSS unpublished report. Kyela District Habiakire, Kabona, Courtright, Lewallen (2010) Rapid Assessment of Avoidable Blindness and Cataract Surgical Services in Kilimanjaro Region, Tanzania Ophth Epi. 17(2):90-94               |
| East Africa | United Republic of Tanzania | local       | 2007                       | 50-99     | 3436           | rural         | Yes   | Best-corrected               | blind, low vision              | Zhang, et al. national epidemiological survey of blindness and low vision in China Chinese medical journal 1992;7:603-608                                                                                                                           |
| East Asia   | China                       | national    | 1987                       | 0-99      | 1579316        | both          | No    | Best-corrected               | blind, low vision              | Zhao J et al. prevalence of blindness and cataract surgery in Shunyi Country, China AJO 1998                                                                                                                                                        |
| East Asia   | China                       | local       | 1996                       | 50-99     | 5052           | rural         | No    | Presenting                   | blind, low vision              | S Li, J Xu, M He, et al. A Survey of Blindness and Cataract Surgery in Doumen County, China. Ophthalmology 1999;106:1602-1615                                                                                                                       |
| East Asia   | China                       | local       | 1997                       | 50-99     | 5342           | rural         | No    | Both                         | blind, low vision              | Gilbert CE et al. Prevalence and causes of functional low vision in school-age children: Results from standardized population surveys in Asia, Africa, and Latin America Investigative Ophthalmology & Visual Science, March 2008, Vol. 49, No. 3   |
| East Asia   | China                       | local       | 1998                       | 5-15      | 5882           | urban         | No    | Both                         | blind, low vision              | S Dunzhu, FS Wang, P Courtright et al. (2003) Blindness and eye diseases in Tibet: findings from a randomised, population based survey Br J Ophthalmol 2003;87:1443-1459                                                                            |
| East Asia   | China                       | subnational | 1999-2000                  | 0-99      | 12644          | rural         | No    | Presenting                   | blind                          | Beijing Eye Study microdata                                                                                                                                                                                                                         |
| East Asia   | China                       | subnational | 2001                       | 35-99     | 4438           | urban         | No    | Best-corrected               | blind, low vision              | Li L, Guan H, kun P, Zhou J, Gu H. Prevalence and causes of visual impairment among the elderly in Nantong, China. Eye, 2008; 22:1069-75.                                                                                                           |
| East Asia   | China                       | local       | 2003                       | 60-99     | 3040           | both          | No    | Best-corrected               | blind, low vision              | Gilbert CE et al. Prevalence and causes of functional low vision in school-age children: Results from standardized population surveys in Asia, Africa, and Latin America Investigative Ophthalmology & Visual Science, March 2008, Vol. 49, No. 3   |
| East Asia   | China                       | local       | 2002-2003                  | 5-15      | 4359           | urban         | No    | Both                         | blind, low vision              | Lu Q, Zheng Y, Sun B, Cui T, Congdon N, Hu A, Chen J, Shi J. A population-based study of visual impairment among pre-school children in Beijing: the Beijing study of visual impairment in children. Am J Ophthalmol. 2009 Jun;147(6):1075-81       |
| East Asia   | China                       | local       | 2004                       | 3-6       | 28738          | both          | No    | Presenting                   | blind, low vision              | He, M., W. Huang, et al. (2007). Refractive Error and Visual Impairment in School Children in Rural Southern China. Ophthalmology 114(2): 374-382.                                                                                                  |
| East Asia   | China                       | local       | 2005                       | 12-18     | 2454           | rural         | No    | Both                         | blind                          | N Congdon, Y Wang, Y Song, et al. (2008) Visual Disability, Visual Function, and Myopia among Rural Chinese Secondary School Children: The Xichang Pediatric Refractive Error Study (X-PRES)—Report 1. Invest Ophthalmol Vis Sci. 2008;49:2888-2894 |
| East Asia   | China                       | subnational | 2007                       | 11-17     | 1892           | rural         | No    | Both                         | blind                          | Zhao, J., L. B. Ellwein, et al. (2010). Prevalence of Vision Impairment in Older Adults in Rural China: The China Nine-Province Survey. Ophthalmology 117(3): 409-416.                                                                              |
| East Asia   | China                       | subnational | 2006-2007                  | 50-99     | 45747          | rural         | No    | Both                         | blind, low vision              | Song W, Sun X, Shao Z, Zhou X, Kang Y, Sui H, Yuan H. 2010. Prevalence and causes of visual impairment in a rural North-east China adult population: a population-based survey in Bin County, Harbin. Acta Ophthalmol. 2010 Sep;88(6):669-86        |
| East Asia   | China                       | local       | 2007                       | 40-99     | 4956           | rural         | No    | Both                         | blind                          | Xiao B, Kuper H, Guan C, Bailey K, Limburg H. Rapid assessment of avoidable blindness in three counties, Jiangxi Province, China. Br J Ophthalmol 2010;94 1437-1504                                                                                 |
| East Asia   | China                       | local       | 2007                       | 50-99     | 3839           | urban         | Yes   | Both                         | blind, low vision              | Xiao B, Kuper H, Guan C, Bailey K, Limburg H. Rapid assessment of avoidable blindness in three counties, Jiangxi Province, China. Br J Ophthalmol 2010;94 1437-1450                                                                                 |
| East Asia   | China                       | local       | 2007                       | 50-99     | 2861           | urban         | Yes   | Both                         | blind, low vision              | Xiao B, Kuper H, Guan C, Bailey K, Limburg H. Rapid assessment of avoidable blindness in three counties, Jiangxi Province, China. Br J Ophthalmol 2010;94 1437-1442                                                                                 |
| East Asia   | China                       | local       | 2007                       | 50-99     |                | urban         | Yes   | Both                         | blind, low vision              | Li Z, Cui H, Liu P, Zhang L, Yang H, Zhang L. Prevalence and causes of blindness and visual impairment among the elderly in rural southern Harbin, China. Ophthalmic Epidemiol, 2008; 15:334-8.                                                     |
| East Asia   | China                       | local       | 2006-2007                  | 50-96     | 5057           | rural         | No    | Presenting                   | blind, low vision              | Liang YB, Friedman DS, Wong TY, et al. (2008). Prevalence and Causes of Low Vision and Blindness in a Rural Chinese Adult Population The Handan Eye Study. Ophthalmology 115(11):1965-72.                                                           |
| East Asia   | China                       | local       | 2006-2007                  | 30-97     | 6830           | rural         | No    | Both                         | blind, low vision              | Min Wu, RAAB in Luliang County, China (2008) unpublished                                                                                                                                                                                            |
| East Asia   | China                       | subnational | 2008                       | 50-99     | 2842           | both          | Yes   | Both                         | blind, low vision              |                                                                                                                                                                                                                                                     |

| GBD Region                   | Country                        | Coverage    | Years (NS = not specified) | Age range | Total examined | Urban / rural | Rapid | Presenting or best-corrected | Core visual acuity levels used | Reference                                                                                                                                                                                                                                                   |
|------------------------------|--------------------------------|-------------|----------------------------|-----------|----------------|---------------|-------|------------------------------|--------------------------------|-------------------------------------------------------------------------------------------------------------------------------------------------------------------------------------------------------------------------------------------------------------|
| East Asia                    | China                          | local       | 2009                       | 0-15      | 23675          | both          | No    | Presenting                   | blind                          | Xiao B, Fan J, Deng Y, Ding Y, Muhit M, Kuper H. Using key informant method to assess the prevalence and causes of childhood blindness in Xiu'shui County, Jiangxi Province, Southeast China. <i>Ophthalmic Epidemiol.</i> 2011 Feb;18(1):30-5.             |
| East Asia                    | China                          | local       | 2010                       | 50-99     | 939            | both          | Yes   | Both                         | blind, low vision              | CHINA INNER MONGOLIA TUOKETUO RAPID DATA                                                                                                                                                                                                                    |
| East Asia                    | China                          | local       | 2010                       | 50-99     | 980            | both          | Yes   | Both                         | blind, low vision              | CHINA INNER MONGOLIA SHANGDU RAPID DATA                                                                                                                                                                                                                     |
| East Asia                    | China                          | local       | 2011                       | 50-99     | 1723           | both          | Yes   | Both                         | blind, low vision              | CHINA SICHUAN DECHANG RAPID DATA                                                                                                                                                                                                                            |
| East Asia                    | China                          | local       | 2011                       | 50-99     | 2865           | both          | Yes   | Both                         | blind, low vision              | CHINA SICHUAN MIANNING RAPID DATA                                                                                                                                                                                                                           |
| East Asia                    | China, Hong Kong SAR           | local       | 1998                       | 60-99     | 3441           | urban         | No    | Both                         | blind, low vision              | Michon, Lau, Chan, Ellwein, prevalence of visual impairment, blindness, and cataract surgery in the Hong Kong elderly BJO 2002;86:133-139                                                                                                                   |
| East Asia                    | Taiwan                         | local       | 1993-1995                  | 50-99     | 2038           | urban         | No    | Best-corrected               | low vision                     | J Liu, C Cheng, S Chen, F Lee. Visual impairment in a Taiwanese population: Prevalence, causes, and socioeconomic factors. <i>Ophthalmic epidemiology.</i> 2001;8:339-355                                                                                   |
| East Asia                    | Taiwan                         | national    | 2002                       | 65-99     | 3160           | both          | No    | Best-corrected               | blind, low vision              | Tsai, C. Y., L. C. Woung, et al. (2005). The current status of visual disability in the elderly population of Taiwan. <i>Japanese Journal of Ophthalmology</i> 49(2): 166-172.                                                                              |
| Eastern Europe               | Estonia                        | local       | NS                         | 65-99     | 910            | urban         | No    | Best-corrected               | blind, low vision              | Seland, Vingerling, Augood, Bentham, Chakravarthy et al. (2009) Visual Impairment and quality of life in the Older European Population, the EUREYE study Act Ophth 2009                                                                                     |
| Eastern Europe               | Russian Federation             | local       | 2008                       | 50-99     |                | urban         | Yes   | Presenting                   | blind, low vision              | Branchevskiy S. 2008, RAAB Samara district Russia - unpublished report                                                                                                                                                                                      |
| North Africa and Middle East | Egypt                          | subnational | 1994                       | 7-15      | 5839           | urban         | No    | Both                         | low vision                     | El-Bayoumy, B. M., A. Saad, et al. (2007). Prevalence of refractive error and low vision among schoolchildren in Cairo. <i>Eastern Mediterranean Health Journal</i> 13(3): 575-9.                                                                           |
| North Africa and Middle East | Egypt                          | local       | 2009                       | 50-99     | 2905           | rural         | Yes   | Both                         | blind, low vision              | EGYPT FAYOUM KASR BASEAL RAPID ASSESSMENT                                                                                                                                                                                                                   |
| North Africa and Middle East | Egypt                          | local       | 2009                       | 50-99     | 2918           | rural         | Yes   | Both                         | blind, low vision              | EGYPT KAFARELSHEAKHSHABAS RAPID ASSESSMENT                                                                                                                                                                                                                  |
| North Africa and Middle East | Egypt                          | local       | 2010                       | 50-99     | 2811           | rural         | Yes   | Both                         | blind, low vision              | EGYPT BANISWEILF MAZORA RAPID ASSESSMENT                                                                                                                                                                                                                    |
| North Africa and Middle East | Egypt                          | local       | 2010                       | 50-99     | 2706           | rural         | Yes   | Both                         | blind, low vision              | EGYPT MENYA QALTA RAPID ASSESSMENT                                                                                                                                                                                                                          |
| North Africa and Middle East | Egypt                          | local       | 2010                       | 50-99     | 2953           | rural         | Yes   | Both                         | blind, low vision              | EGYPT SOHAG BAGA RAPID ASSESSMENT                                                                                                                                                                                                                           |
| North Africa and Middle East | Iran (Islamic Republic of)     | local       | 2002                       | 1-99      | 4565           | urban         | No    | Both                         | blind, low vision              | Fotouhi, A., H. Hashemi, et al. (2004). The prevalence and causes of visual impairment in Tehran: the Tehran Eye Study. <i>British Journal of Ophthalmology</i> 88(6): 740-5.                                                                               |
| North Africa and Middle East | Iran (Islamic Republic of)     | local       | 2005                       | 7-15      | 5544           | both          | No    | Both                         | blind                          | Fotouhi, A., H. Hashemi, et al. (2007). The prevalence of refractive errors among schoolchildren in Dezrul, Iran. <i>British Journal of Ophthalmology</i> 91(3): 287-292.                                                                                   |
| North Africa and Middle East | Iran (Islamic Republic of)     | local       | NS                         | 0-15      | 136000         | both          | No    | Presenting                   | blind                          | Razavi H, Kuper H, Rezvan F, Amelie K, Mahboobi-Pur H, Oladi MR, Muhit M, Hashemi H. 2010. Prevalence and causes of severe visual impairment and blindness among children in the lorestan province of iran, using the key informant method. <i>Ophthalm</i> |
| North Africa and Middle East | Iran (Islamic Republic of)     | local       | 2009                       | 50-99     | 2819           | both          | Yes   | Presenting                   | blind, low vision              | Rajavi Z, Katibeh M, Ziaei H, Fardesmaeilpour N, Sehat M, Ahmadi H, Javadi MA. Rapid assessment of avoidable blindness in Iran. <i>Ophthalmology.</i> 2011 Sep;118(9):1812-8                                                                                |
| North Africa and Middle East | Iran (Islamic Republic of)     | local       | 2008-2009                  | 40-64     | 5190           | urban         | No    | Presenting                   | low vision                     | Emamian MH, Zeraati H, Majdzadeh R, Shariati M, Hashemi H, Fotouhi A. The gap of visual impairment between economic groups in Shahrud, Iran: a Blinder-Oaxaca decomposition. <i>Am J Epidemiol.</i> 2011 Jun 15;173(12):1463-7.                             |
| North Africa and Middle East | Lebanon                        | national    | 1995                       | 3-98      | 10148          | both          | No    | Presenting                   | blind, low vision              | Mansour, A. M., K. Kassak, et al. (1997). National survey of blindness and low vision in Lebanon. <i>British Journal of Ophthalmology</i> 81(10): 905-6.                                                                                                    |
| North Africa and Middle East | Morocco                        | national    | 1992                       | 0-99      | 8878           | both          | No    | Best-corrected               | blind, low vision              | Annon (1994). Prevention of blindness (PBL) : prevalence and causes of blindness and low vision. <i>Weekly Epidemiological Record</i> 69(18): 129-161.                                                                                                      |
| North Africa and Middle East | Occupied Palestinian Territory | national    | 2008                       | 50-99     | 3579           | both          | Yes   | Presenting                   | blind, low vision              | Chiang F, Kuper H, Lindfield R, Keenan T, Seyam N, Magauran D, Khallia N, Batta H, Abdeen Z, Sargent N. Rapid assessment of avoidable blindness in the Occupied Palestinian Territories. <i>PLoS One.</i> 2010 Jul 29;5(7):e11854.                          |

| GBD Region                   | Country                  | Coverage    | Years (NS = not specified) | Age range | Total examined | Urban / rural | Rapid | Presenting or best-corrected | Core visual acuity levels used | Reference                                                                                                                                                                                                                                            |
|------------------------------|--------------------------|-------------|----------------------------|-----------|----------------|---------------|-------|------------------------------|--------------------------------|------------------------------------------------------------------------------------------------------------------------------------------------------------------------------------------------------------------------------------------------------|
| North Africa and Middle East | Oman                     | national    | 1996-1997                  | 0-99      | 11417          | both          | No    | Presenting                   | blind                          | Khandekar, R., A. J. Mohammed, et al. (2004). Coverage of cataract surgery per person and per eye: review of a community-based blindness survey in Oman. <i>Ophthalmic Epidemiology</i> 11(4): 291-9.                                                |
| North Africa and Middle East | Qatar                    | national    | 2009                       | 50-99     | 2433           | both          | Yes   | Best-corrected               | blind, low vision              | Al Gamra H, Al Mansouri F, Khandekar R, Elshafei M, Al Qahtani O, Singh R, Hashim SP, Mujahed A, Makled A, Pai A. Prevalence and causes of blindness, low vision and status of cataract in 50 years and older citizen of Qatar-a community based sur |
| North Africa and Middle East | Tunisia                  | national    | 1993                       | 0-99      | 3547           | both          | No    | Presenting                   | blind, low vision              | Ayed S, Négrel A-D, Nabli M, Jebri A M, Siddhom J. Prevalence et causes de la cécité en République Tunisienne. <i>Cahiers Sante</i> 1998;8:275-282.                                                                                                  |
| North Africa and Middle East | Turkey                   | subnational | 1989                       | 0-99      | 7497           | both          | No    | Presenting                   | blind, low vision              | Négrel, A. D., D. C. Minassian, et al. (1996). Blindness and low vision in southeast Turkey. <i>Ophthalmic Epidemiology</i> 3(3): 127-34.                                                                                                            |
| North Africa and Middle East | Yemen                    | local       | 2009                       | 50-99     | 1789           | rural         | Yes   | Both                         | blind, low vision              | YEMEN AMRAN RAPID ASSESSMENT                                                                                                                                                                                                                         |
| North Africa and Middle East | Yemen                    | local       | 2009                       | 50-99     | 1836           | rural         | Yes   | Both                         | blind, low vision              | YEMEN LAHJ RAPID ASSESSMENT                                                                                                                                                                                                                          |
| North America, high-income   | United States of America | local       | 1985-1988                  | 40-99     | 5308           | urban         | No    | Best-corrected               | blind, low vision              | BALTIMORE EYE STUDY                                                                                                                                                                                                                                  |
| North America, high-income   | United States of America | local       | 1988-1990                  | 40-89     | 4916           | rural         | No    | Best-corrected               | blind, low vision              | Klein R, Klein BEK, Lee KE. Changes in visual acuity in a population. The Beaver Dam Eye Study. <i>Ophthalmology</i> 1996;103:1169-78.                                                                                                               |
| North America, high-income   | United States of America | local       | 1993-1995                  | 65-84     | 2519           | urban         | No    | Best-corrected               | blind, low vision              | Salisbury ES                                                                                                                                                                                                                                         |
| North America, high-income   | United States of America | local       | 1999-2000                  | 40-99     | 4766           | urban         | No    | Best-corrected               | blind, low vision              | Proyecto VER                                                                                                                                                                                                                                         |
| Oceania                      | Fiji                     | national    | 2006-2007                  | 0-15      |                | both          | No    | Best-corrected               | low vision                     | Cama AT, Sikivou BT, Keeffe JE. Childhood visual impairment in Fiji. <i>Arch Ophthalmol.</i> 2010 May;128(5):608-12.                                                                                                                                 |
| Oceania                      | Fiji                     | subnational | 2009                       | 40-99     | 1381           | both          | No    | Presenting                   | blind, low vision              | Brian G, Pearce MG, Ramke J. Refractive error and presbyopia among adults in Fiji. <i>Ophthalmic Epidemiol.</i> 2011 Apr;18(2):75-82.                                                                                                                |
| Oceania                      | Papua New Guinea         | local       | 2004-2005                  | 50-99     | 1174           | both          | Yes   | Presenting                   | blind, low vision              | Garap, J. N., S. Sheeladevi, et al. (2006). Blindness and vision impairment in the elderly of Papua New Guinea. <i>Clinical and Experimental Ophthalmology</i> 34(4): 335-341.                                                                       |
| Oceania                      | Tonga                    | subnational | 1991                       | 20-99     | 4056           | both          | No    | Best-corrected               | blind, low vision              | Newland, Woodward, et al. (1994). Epidemiology of blindness and visual impairment in the kingdom of Tonga. <i>British Journal of Ophthalmology</i> 78(5): 344-8.                                                                                     |
| Oceania                      | Vanuatu                  | national    | 1989                       | 6-99      | 3520           | both          | No    | Best-corrected               | blind                          | Newland, H. S., M. F. Harris, et al. (1992). Epidemiology of blindness and visual impairment in Vanuatu. <i>Bulletin of the World Health Organization</i> 70(3): 369-72.                                                                             |
| South Asia                   | Bangladesh               | national    | 1999-2000                  | 30-99     | 11624          | both          | No    | Both                         | blind, low vision              | Bourne Bangladesh National Eye Survey Microdata (1999)                                                                                                                                                                                               |
| South Asia                   | Bangladesh               | local       | 2005                       | 50-99     | 4868           | rural         | Yes   | Presenting                   | blind, low vision              | Wadud, Z., H. Kuper, et al. (2006). Rapid assessment of avoidable blindness and needs assessment of cataract surgical services in Satkhira District, Bangladesh. <i>British Journal of Ophthalmology</i> 90(10): 1225-9.                             |
| South Asia                   | India                    | national    | 1986-1989                  | 0-99      |                | both          | No    | Presenting                   | blind                          | Mohan, Survey of blindness in India 1986-1989, National Programme for control of blindness Ministry of Health of Govt of India                                                                                                                       |
| South Asia                   | India                    | local       | 1993-1995                  | 3-18      | 3669           | urban         | No    | Both                         | blind, low vision              | Kalivayai, V., T. J. Naduvilath, et al. (1997). Visual impairment in school children in southern India.[erratum appears in <i>Indian J Ophthalmol</i> 1997 Sep;45(3):168]. <i>Indian Journal of Ophthalmology</i> 45(2): 129-34.                     |
| South Asia                   | India                    | local       | 1995-1997                  | 6-99      | 9012           | rural         | No    | Both                         | blind                          | Thulasiraj, R. D., P. K. Nirmalan, et al. (2003). Blindness and vision impairment in a rural South Indian population: The Aravind Comprehensive Eye Survey. <i>Ophthalmology</i> 110(8): 1491-1498.                                                  |
| South Asia                   | India                    | local       | 1996                       | 0-99      | 10293          | both          | No    | Presenting                   | blind, low vision              | Dandona, R., L. Dandona, et al. (2002). Moderate visual impairment in India: the Andhra Pradesh Eye Disease Study. <i>British Journal of Ophthalmology</i> 86(4): 373-7.                                                                             |
| South Asia                   | India                    | local       | NS                         | 50-99     | 4284           | rural         | No    | Both                         | blind, low vision              | Murthy, G. V. S., L. B. Ellwein, et al. (2001). A population-based eye survey of older adults in a rural district of Rajasthan: I. Central vision impairment, blindness, and cataract surgery. <i>Ophthalmology</i> 108(4): 679-685.                 |
| South Asia                   | India                    | local       | 1999                       | 50-99     | 4642           | both          | No    | Both                         | blind, low vision              | Thulasiraj, R. D., R. Rahamathulla, et al. (2002). The Sivaganga eye survey: I. Blindness and cataract surgery. <i>Ophthalmic Epidemiology</i> 9(5): 299-353                                                                                         |

| GBD Region | Country | Coverage    | Years (NS = not specified) | Age range | Total examined | Urban / rural | Rapid | Presenting or best-corrected | Core visual acuity levels used | Reference                                                                                                                                                                                                                                                                              |
|------------|---------|-------------|----------------------------|-----------|----------------|---------------|-------|------------------------------|--------------------------------|----------------------------------------------------------------------------------------------------------------------------------------------------------------------------------------------------------------------------------------------------------------------------------------|
| South Asia | India   | local       | 2000                       | 50-99     | 5411           | rural         | No    | Presenting                   | blind                          | Nirmalan PK, Thulasiraj RD, Maneksha V, Rahmathullah R, Ramakrishnan R, Padmavathi A and others. 2002. A population based eye survey of older adults in Tirunelveli district of south India: blindness, cataract surgery, and visual outcomes. <i>Briti</i>                            |
| South Asia | India   | subnational | 1999-2001                  | 50-99     | 63337          | both          | No    | Both                         | blind, low vision              | Murthy, G. V., S. K. Gupta, et al. (2005). Current estimates of blindness in India. <i>British Journal of Ophthalmology</i> 89(3): 257-60.                                                                                                                                             |
| South Asia | India   | local       | 2000-2001                  | 5-15      | 4973           | both          | No    | Both                         | blind, low vision              | Gilbert CE et al. Prevalence and causes of functional low vision in school-age children: Results from standardized population surveys in Asia, Africa, and Latin America Investigative Ophthalmology & Visual Science, March 2008, Vol. 49, No. 3                                      |
| South Asia | India   | local       | 2002                       | 50-99     | 1505           | rural         | No    | Presenting                   | blind                          | Chandrashekhara TS, Bhat HV, Pai RP, Nair SK.: Prevalence of blindness and its causes among those aged 50 years and above in rural Karnataka, South India. 2007. <i>Tropical Doctor</i> . 37, 18-21.                                                                                   |
| South Asia | India   | local       | 2002                       | 0-15      | 10605          | rural         | No    | Both                         | blind, low vision              | Nirmalan, P. K., P. Vijayalakshmi, et al. (2003). The Kariapatti pediatric eye evaluation project: Baseline ophthalmic data of children aged 15 years or younger in Southern India. <i>American Journal of Ophthalmology</i> 136(4): 703-709.                                          |
| South Asia | India   | local       | 2001-2003                  | 40-99     | 3924           | rural         | No    | Both                         | blind, low vision              | Vijaya, L., R. George, et al. (2006). Prevalence and causes of blindness in the rural population of the Chennai Glaucoma Study. <i>British Journal of Ophthalmology</i> 90(4): 407-10.                                                                                                 |
| South Asia | India   | local       | NS                         | 0-15      | 8684           | rural         | No    | Best-corrected               | blind                          | Dorairaj SK, Bandrakalli P, Shetty C, Vathsala R, Misquith D, Ritch R.: Childhood blindness in a rural population of Southern India: Prevalence and etiology. 2008. <i>Ophthalmic Epidemiology</i> . 15(3), 176-182.                                                                   |
| South Asia | India   | subnational | 2007                       | 50-99     | 40447          | both          | Yes   | Presenting                   | blind, low vision              | Neena, J., J. Rachel, et al. (2008). Rapid Assessment of Avoidable Blindness in India. <i>PLoS ONE [Electronic Resource]</i> 3(8): e2867.                                                                                                                                              |
| South Asia | India   | local       | 2009                       | 50-99     | 2004           | both          | Yes   | Best-corrected               | blind, low vision              | Dhake PV, Dole K, Khandekar R, Deshpande M. Prevalence and causes of avoidable blindness and severe visual impairment in a tribal district of Maharashtra, India. <i>Oman J Ophthalmol</i> . 2011 Sep;4(3):129-34.                                                                     |
| South Asia | India   | local       | 2011                       | 50-99     | 2907           | both          | Yes   | Both                         | blind, low vision              | KOLAR KARNATAKA RAPID ASSESSMENT Brilliant LB, Pokhrel RP, Grasset NC, Lepkowski JM, Kolstad A, Hawks W, Pararajasegaram R, Brilliant GE, Gilbert S, Shrestha SR, Juo J.: Epidemiology of blindness in Nepal. 1985. <i>Bulletin of the World Health Organisation</i> . 63(2), 375-386. |
| South Asia | Nepal   | national    | 1980-1981                  | 0-99      | 39887          | both          | No    | Best-corrected               | blind                          | Pokharel GP, Negrel AD, Munoz SR, Ellwein LB. 2000. Refractive error study in children: Results from Mechi Zone, Nepal. <i>American Journal of Ophthalmology</i> 129(4):436-444.                                                                                                       |
| South Asia | Nepal   | subnational | 1997                       | 5-15      | 4803           | both          | No    | Both                         | low vision                     | Gilbert CE et al. Prevalence and causes of functional low vision in school-age children: Results from standardized population surveys in Asia, Africa, and Latin America Investigative Ophthalmology & Visual Science, March 2008, Vol. 49, No. 3                                      |
| South Asia | Nepal   | local       | 1998                       | 5-15      | 4802           | rural         | No    | Both                         | blind, low vision              | Sapkota, Y. D., G. P. Pokharel, et al. (2006). Prevalence of blindness and cataract surgery in Gandaki Zone, Nepal. <i>British Journal of Ophthalmology</i> 90(4): 411-6.                                                                                                              |
| South Asia | Nepal   | local       | 2002                       | 45-99     | 5002           | rural         | No    | Both                         | blind                          | Sapkota YD, Sunuwar M, Naito T, Akura J, Adhikari HK. The prevalence of blindness and cataract surgery in rautahat district, Nepal. <i>Ophthalmic Epidemiol</i> . 2010 Mar;17(2):82-9.                                                                                                 |
| South Asia | Nepal   | local       | 2006                       | 50-99     | 4717           | rural         | Yes   | Both                         | blind, low vision              | Sherchan A, Kandel RP, Sharma MK, Sapkota YD, Aghajanian J, Bassett KL. Blindness prevalence and cataract surgical coverage in Lumbini Zone and Chetwan District of Nepal. <i>Br J Ophthalmol</i> . 2010 Feb;94(2):161-6.                                                              |
| South Asia | Nepal   | local       | 2006                       | 50-99     | 5138           | rural         | Yes   | Both                         | blind, low vision              | Thapa SS, Berg RV, Khanal S, Paudyal I, Pandey P, Maharjan N, Twyana SN, Paudyal G, Gurung R, Ruit S, Rens GH. 2011. Prevalence of visual impairment, cataract surgery and awareness of cataract and glaucoma in Bhaktapur district of Nepal: the Bh                                   |
| South Asia | Nepal   | local       | NS                         | 40-99     | 4003           | both          | No    | Both                         | blind, low vision              |                                                                                                                                                                                                                                                                                        |
| South Asia | Nepal   | local       | 2008                       | 50-99     | 2914           | rural         | Yes   | Both                         | blind, low vision              | NEPAL SAGARMATA ZONE RAPID DATA                                                                                                                                                                                                                                                        |
| South Asia | Nepal   | local       | 2008                       | 50-99     | 2895           | both          | Yes   | Both                         | blind, low vision              | NEPAL KOSHI ZONE RAPID DATA                                                                                                                                                                                                                                                            |
| South Asia | Nepal   | subnational | 2008                       | 50-99     | 3613           | both          | Yes   | Both                         | blind, low vision              | Reeta Gurung (2008), RAAAB in Bagmati and Janakpur zone, Nepal. Unpublished                                                                                                                                                                                                            |
| South Asia | Nepal   | local       | 2008                       | 50-99     | 2513           | rural         | Yes   | Both                         | blind, low vision              | NEPAL SETI & MAHAKALI ZONES RAPID DATA                                                                                                                                                                                                                                                 |
| South Asia | Nepal   | local       | 2008                       | 50-99     | 1171           | rural         | Yes   | Both                         | blind, low vision              | NEPAL KARNALI ZONE RAPID DATA                                                                                                                                                                                                                                                          |

| GBD Region     | Country     | Coverage    | Years (NS = not specified) | Age range | Total examined | Urban / rural | Rapid | Presenting or best-corrected | Core visual acuity levels used | Reference                                                                                                                                                                                                                                            |
|----------------|-------------|-------------|----------------------------|-----------|----------------|---------------|-------|------------------------------|--------------------------------|------------------------------------------------------------------------------------------------------------------------------------------------------------------------------------------------------------------------------------------------------|
| South Asia     | Nepal       | local       | 2009                       | 50-99     | 3041           | rural         | Yes   | Both                         | blind, low vision              | NEPAL MECI ZONE RAPID DATA                                                                                                                                                                                                                           |
| South Asia     | Nepal       | local       | 2009                       | 50-99     | 2993           | rural         | Yes   | Both                         | blind, low vision              | NEPAL BHERI ZONE RAPID DATA                                                                                                                                                                                                                          |
| South Asia     | Nepal       | local       | 2010                       | 50-99     | 2990           | rural         | Yes   | Both                         | blind, low vision              | NEPAL DHAULAGIRI ZONE RAPID DATA                                                                                                                                                                                                                     |
| South Asia     | Nepal       | local       | 2010                       | 50-99     | 2921           | rural         | Yes   | Both                         | blind, low vision              | NEPAL RAPTI ZONE RAPID DATA                                                                                                                                                                                                                          |
| South Asia     | Pakistan    | local       | 1998                       | 40-99     | 1106           | rural         | No    | Presenting                   | blind, low vision              | Ahmad K, Khan MD, Qureshi MB, Munami S, Shah RA, Rasheed H, Jamali B, Baluch A, Khan MA.; Prevalence and causes of blindness and low vision in a rural setting in Pakistan. 2005. Ophthalmic Epidemiology. 12(1), 19-23.                             |
| South Asia     | Pakistan    | local       | NS                         | 50-99     | 1505           | both          | Yes   | Both                         | blind, low vision              | Haider S, Hussain A, Limburg H, 2003. Cataract blindness in Chakwal District, Pakistan: results of a survey. Ophthalmic Epidemiology 10(4):249-58.                                                                                                   |
| South Asia     | Pakistan    | national    | 2001-2003                  | 30-99     | 16507          | both          | No    | Presenting                   | blind, low vision              | Bourne Pakistan national Eye Survey Microdata (2001)                                                                                                                                                                                                 |
| South Asia     | Pakistan    | local       | NS                         | 50-99     | 1549           | rural         | Yes   | Best-corrected               | blind                          | Anjum KM, Qureshi MB, Khan MA, Jan N, Ali A, Ahmad K, Khan MD.: Cataract blindness and visual outcome of cataract surgery in a tribal area in Pakistan. 2006. British Journal of Ophthalmology. 90, 135-138.                                         |
| South Asia     | Pakistan    | local       | 2003                       | 5-15      | 5110           | urban         | No    | Presenting                   | blind, low vision              | Shaikh, S. P. and T. M. Aziz (2005). Pattern of eye diseases in children of 5-15 years at Bazzertaline area (South Karachi) Pakistan. Journal of the College of Physicians and Surgeons Pakistan 15(5): 291-294.                                     |
| Southeast Asia | Cambodia    | subnational | 1996                       | 0-99      | 5803           | both          | No    | Presenting                   | blind, low vision              | Rutzen, A. R., N. J. Elish, et al. (2007). Blindness and eye disease in Cambodia. Ophthalmic Epidemiology 14(6): 360-6.                                                                                                                              |
| Southeast Asia | Cambodia    | subnational | 2002                       | 50-99     |                | both          | Yes   | Presenting                   | blind, low vision              | Sub-Committee for the Prevention of Blindness, Cambodia. Results of rapid assessment of cataract surgical services. Cambodia: Battambang. 2002.                                                                                                      |
| Southeast Asia | Cambodia    | national    | 2007                       | 50-99     |                | both          | Yes   | Presenting                   | blind, low vision              | Cambodia 2007 - contact: Dr. Do Seiha RAAB unpublished report without authors                                                                                                                                                                        |
| Southeast Asia | Indonesia   | local       | 2001-2002                  | 21-99     | 989            | both          | No    | Presenting                   | blind, low vision              | Saw, S. M., R. Husain, et al. (2003). Causes of low vision and blindness in rural Indonesia. British Journal of Ophthalmology 87(9): 1075-8.                                                                                                         |
| Southeast Asia | Indonesia   | local       | 2004                       | 50-99     |                | both          | Yes   | Presenting                   | blind, low vision              | Indonesia 2004 - RACSS unpublished report, not sure of principal investigator, Lombok                                                                                                                                                                |
| Southeast Asia | Malaysia    | local       | 1993-1994                  | 18-99     | 282            | rural         | No    | Best-corrected               | blind, low vision              | Zainal, M., L. Masran, et al. (1998). Blindness and visual impairment amongst rural Malays in Kuala Selangor, Selangor. Medical Journal of Malaysia 53(1): 46-50.                                                                                    |
| Southeast Asia | Malaysia    | national    | 1996-1997                  | 0-99      | 18027          | both          | No    | Presenting                   | blind, low vision              | Zainal, M., S. M. Ismail, et al. (2002). Prevalence of blindness and low vision in Malaysian population: results from the National Eye Survey 1996. British Journal of Ophthalmology 86(9): 951-6.                                                   |
| Southeast Asia | Malaysia    | local       | 2000                       | 40-99     | 311            | rural         | No    | Presenting                   | blind, low vision              | Reddy, S. C., L. Rampal, et al. (2004). Prevalence and causes of visual impairment and blindness in a rural population in Sepang district, Selangor. Medical Journal of Malaysia 59(2): 212-7.                                                       |
| Southeast Asia | Malaysia    | local       | 2003                       | 7-15      | 4629           | urban         | No    | Both                         | blind, low vision              | Goh PP, Abqariyah Y, Pokharell GP, Ellwein LB.: Refractive error and visual impairment in school-age children in Gombak district, Malaysia. 2005. American Academy of Ophthalmology. 112, 678-685.                                                   |
| Southeast Asia | Malaysia    | local       | 2004-2006                  | 40-80     | 3280           | urban         | No    | Both                         | blind, low vision              | Wong, T. Y., E. W. Chong, et al. (2008). Prevalence and causes of low vision and blindness in an urban Malay population: the Singapore Malay Eye Study. Archives of Ophthalmology 126(8): 1091-9.                                                    |
| Southeast Asia | Myanmar     | local       | 2001                       | 50-99     |                | both          | Yes   | Presenting                   | blind, low vision              | Limburg H, Maung N, Khin Aye Soe, Mynt Than Win. Study report on rapid assessment of cataract surgical services in Hinthada Township, Union of Myanmar. Ministry of Health, Department of Health, Trachoma Control and Prevention of Blindness Progr |
| Southeast Asia | Myanmar     | local       | 2005                       | 40-99     | 2076           | rural         | No    | Both                         | blind, low vision              | Casson, R. J., H. S. Newland, et al. (2007). Prevalence and Causes of Visual Impairment in Rural Myanmar. The Meiktila Eye Study. Ophthalmology 114(12): 2302-2308.                                                                                  |
| Southeast Asia | Philippines | local       | 2005                       | 50-99     | 2774           | rural         | Yes   | Presenting                   | blind, low vision              | Eusebio, C., H. Kuper, et al. (2007). Rapid assessment of avoidable blindness in Negros Island and Antique District, Philippines. British Journal of Ophthalmology 91(12): 1588-1592.                                                                |
| Southeast Asia | Philippines | local       | 2006                       | 50-99     | 3177           | rural         | Yes   | Presenting                   | blind, low vision              | Eusebio, C., H. Kuper, et al. (2007). Rapid assessment of avoidable blindness in Negros Island and Antique District, Philippines. British Journal of Ophthalmology 91(12): 1588-1592.                                                                |

| GBD Region             | Country      | Coverage    | Years (NS = not specified) | Age range | Total examined | Urban / rural | Rapid | Presenting or best-corrected | Core visual acuity levels used | Reference                                                                                                                                                                                                                                                     |
|------------------------|--------------|-------------|----------------------------|-----------|----------------|---------------|-------|------------------------------|--------------------------------|---------------------------------------------------------------------------------------------------------------------------------------------------------------------------------------------------------------------------------------------------------------|
| Southeast Asia         | Sri Lanka    | local       | 2006-2007                  | 40-99     | 1375           | rural         | No    | Best-corrected               | blind, low vision              | Edussuriya K, Sennanayake S, Senaratne T, Marshall D, Sullivan T, Selva D, Casson RJ. The prevalence and causes of visual impairment in central Sri Lanka the Kandy Eye study. <i>Ophthalmology</i> . 2009 Jan;116(1):52-6.                                   |
| Southeast Asia         | Thailand     | national    | 1994-1995                  | 0-99      |                | both          | No    | Presenting                   | blind, low vision              | Prompubesara and Wongwetsawat Third National Survey on blindness and low vision in Thailand 1994 UNPUBLISHED                                                                                                                                                  |
| Southeast Asia         | Thailand     | local       | 1997-1998                  | 40-99     | 2092           | urban         | No    | Best-corrected               | blind, low vision              | Singalavanija, A., A. Metheetrairut, et al. (2001). Ocular diseases and blindness in elderly Thais. <i>Journal of the Medical Association of Thailand</i> 84(10): 1383-8.                                                                                     |
| Southeast Asia         | Thailand     | local       | 1997-1999                  | 50-99     | 701            | urban         | No    | Both                         | blind                          | Bourne, R. R., P. Sukodom, et al. (2003). Prevalence of glaucoma in Thailand: a population based survey in Rom Klao District, Bangkok. <i>British Journal of Ophthalmology</i> 87(9): 1069-74.                                                                |
| Southeast Asia         | Timor-Leste  | subnational | 2005                       | 40-99     | 1414           | both          | Yes   | Presenting                   | blind, low vision              | Ramke, J., R. du Toit, et al. (2007). Correction of refractive error and presbyopia in Timor-Leste.[see comment]. <i>British Journal of Ophthalmology</i> 91(7): 860-6.                                                                                       |
| Southeast Asia         | Viet Nam     | subnational | 2000-2002                  | 50-99     | 14138          | both          | Yes   | Both                         | blind, low vision              | Limburg (2008): Results of Rapid Assessment for Avoidable blindness (RAAB) in 16 provinces of Vietnam                                                                                                                                                         |
| Southeast Asia         | Viet Nam     | subnational | 2007                       | 50-99     | 28033          | both          | Yes   | Both                         | blind, low vision              | Limburg (2008): Results of Rapid Assessment for Avoidable blindness (RAAB) in 16 provinces of Vietnam                                                                                                                                                         |
| Southern Africa        | Botswana     | national    | 1998                       | 60-99     | 372            | both          | No    | Presenting                   | blind                          | Clausen T, Romoren TI, Ferriera M, Kristensen P, Ingstad B, Holmboe-Ottensen G. Chronic diseases and health inequalities in older persons in Botswana (southern Africa): A national survey. 2005. <i>The Journal of Nutrition, Health and Aging</i> . 9 (6)   |
| Southern Africa        | South Africa | local       | NS                         | 0-99      | 6090           | rural         | No    | Presenting                   | blind, low vision              | Cook CD, Knight SE, Crofton-Briggs I.: Prevalence and causes of low vision and blindness in northern Kwazulu. 1993. <i>SAMJ</i> . 83 590-593.                                                                                                                 |
| Southern Africa        | South Africa | local       | 1992                       | 40-99     | 987            | rural         | No    | Presenting                   | blind                          | Salmon JF, Mermoud A, Ivey A, Swanevelder SA, Hoffman M.: The prevalence of primary angle closure glaucoma, and open angle glaucoma in Mamre, Western Cape, South Africa. 1993. <i>Arch Ophthalmol</i> . 111 1263-1269.                                       |
| Southern Africa        | South Africa | local       | 1998-1999                  | 40-99     | 1005           | rural         | No    | Presenting                   | blind                          | Rotchford AP, Johnson GJ.: Glaucoma in Zulus. A Population-Based Cross-sectional Survey in a Rural District in South Africa. 2002. <i>Arch Ophthalmol</i> . 120. 471-478.                                                                                     |
| Southern Africa        | South Africa | local       | 2002                       | 5-15      | 4679           | both          | No    | Both                         | blind, low vision              | Gilbert CE et al.(2008) Prevalence and causes of functional low vision in school-age children: Results from standardized population surveys in Asia, Africa, and Latin America <i>Investigative Ophthalmology &amp; Visual Science</i> , Vol. 49, No. 3       |
| Southern Africa        | Zimbabwe     | local       | NS                         | 60-99     | 278            | both          | No    | Presenting                   | blind                          | Allain TJ, Wilson AO, Gomo ZAR, Mushangi E, Senzanje B, Adamchak DJ, Matenga JA.: Morbidity and disability in elderly Zimbabweans. 1997. <i>Age and Ageing</i> . 26 115-121.                                                                                  |
| Southern Latin America | Argentina    | local       | 2005                       | 50-99     | 4302           | urban         | Yes   | Both                         | blind, low vision              | Nano, M. E., H. D. Nano, et al. (2006). Rapid assessment of visual impairment due to cataract and cataract surgical services in urban Argentina. <i>Ophthalmic Epidemiology</i> 13(3): 191-197.                                                               |
| Southern Latin America | Chile        | local       | 1998                       | 5-15      | 5284           | urban         | No    | Both                         | blind, low vision              | Gilbert CE et al. Prevalence and causes of functional low vision in school-age children: Results from standardized population surveys in Asia, Africa, and Latin America <i>Investigative Ophthalmology &amp; Visual Science</i> , March 2008, Vol. 49, No. 3 |
| Southern Latin America | Chile        | local       | 2006-2007                  | 50-99     | 2915           | both          | Yes   | Both                         | blind, low vision              | Fernando Barrã-, Arcg, Chil. <i>Oftal</i> 2007 Análisis de las barreras, cobertura y resultados postoperatorios de cirugía de catarata determinados mediante encuesta rápida de ceguera evitable en la VIII región, Chile                                     |
| Southern Latin America | Uruguay      | local       | 2011                       | 50-99     | 3729           | both          | Yes   | Both                         | blind, low vision              | URUGUAY RAPID DATA                                                                                                                                                                                                                                            |
| Tropical Latin America | Brazil       | local       | 2002                       | 0-99      | 801            | urban         | No    | Both                         | blind, low vision              | Araujo Filho, A., S. R. Salomao, et al. (2008). Prevalence of visual impairment, blindness, ocular disorders and cataract surgery outcomes in low-income elderly from a metropolitan region of Sao Paulo--Brazil. <i>Arquivos Brasileiros de Oftalmologia</i> |
| Tropical Latin America | Brazil       | local       | 2003                       | 50-99     | 2224           | urban         | Yes   | Both                         | blind, low vision              | Arieta, C. E. L., D. F. de Oliveira, et al. (2009). Cataract remains an important cause of blindness in Campinas, Brazil. <i>Ophthalmic Epidemiology</i> 16(1): 58-63.                                                                                        |
| Tropical Latin America | Brazil       | local       | 2004                       | 0-99      | 3678           | urban         | No    | Both                         | blind, low vision              | Salomao, S. R., R. W. Cinoto, et al. (2008). Prevalence and causes of vision impairment and blindness in older adults in Brazil: the sao paulo eye study. <i>Ophthalmic Epidemiology</i> 15(3): 167-75.                                                       |

| GBD Region             | Country    | Coverage    | Years (NS = not specified) | Age range | Total examined | Urban / rural | Rapid | Presenting or best-corrected | Core visual acuity levels used | Reference                                                                                                                                                                                                                                           |
|------------------------|------------|-------------|----------------------------|-----------|----------------|---------------|-------|------------------------------|--------------------------------|-----------------------------------------------------------------------------------------------------------------------------------------------------------------------------------------------------------------------------------------------------|
| Tropical Latin America | Brazil     | local       | NS                         | 0-99      | 2485           | urban         | No    | Both                         | blind, low vision              | Schellini SA, Durkin SR, Hoyama E, Hirai F, Cordeiro R, Casson RJ, Selya D, Padovani CR. Prevalence and causes of visual impairment in a Brazilian population: the Botucatu Eye Study. BMC Ophthalmol. 2009 Aug 19;9:8.                             |
| Tropical Latin America | Paraguay   | national    | 1999                       | 50-99     | 2136           | both          | Yes   | Both                         | blind, low vision              | Duerksen R, Limburg H, Carron JE, Foster A. Cataract blindness in Paraguay—results of a national survey. Ophthalmic Epidemiol. 2003; 10(5):349–57.                                                                                                  |
| Tropical Latin America | Paraguay   | national    | 2011                       | 50-99     | 2862           | both          | Yes   | Both                         | blind, low vision              | PARAGUAY 2011 RAPID DATA                                                                                                                                                                                                                            |
| West Africa            | Benin      | national    | 1990                       | 0-99      | 7047           | both          | No    | Best-corrected               | blind                          | Negrel AD, Avognon Z, Minassian DC, Babagbeto M, Oussa G, Bassabi S.: Blindness in Benin. 1995. Med Trop (Mars) 55 (4 Pt 2) 409-414.                                                                                                                |
| West Africa            | Cameroon   | subnational | 1992                       | 6-99      | 10647          | both          | No    | Presenting                   | blind, low vision              | Wilson, M. R., M. Mansour, et al. (1996). Prevalence and causes of low vision and blindness in the Extreme North Province of Cameroon, West Africa. Ophthalmic Epidemiology 3(1): 23-33.                                                            |
| West Africa            | Cameroon   | local       | NS                         | 40-99     | 1787           | rural         | Yes   | Presenting                   | blind, low vision              | Oye JE, Kuper H, Dineen B, Befidi-Mengue R, Foster A.: Prevalence ad causes of blindness and visual impairment in Muyuka: a rural health distric in South West Province, Cameroon. 2006. British Journal of Ophthalmology. 90 (5) 538-542.          |
| West Africa            | Cameroon   | local       | NS                         | 40-99     | 2215           | urban         | Yes   | Presenting                   | blind, low vision              | Oye JE, Kuper H.: Prevalence and causes of blindness and visual impairment in Limbe urban area, South West Province, Cameroon. 2007. British Journal of Ophthalmology. 91 1435-1439.                                                                |
| West Africa            | Cape Verde | subnational | 1998                       | 0-99      | 3374           | both          | No    | Presenting                   | blind, low vision              | Schemann JF, Inocencio F, Monteiro ML, Andrade J, Auzemery A, Guelfi Y. :Blindness and Low Vision in cape Verde Islands: Results of a National Eye Survey. 2006. Ophthalmic Epidemiology. 13(4), 219-226.                                           |
| West Africa            | Gambia     | national    | 1986                       | 0-99      | 8174           | both          | No    | Presenting                   | blind, low vision              | Faal H, Minassian D, Sowa S, Foster A.: National survey of blindness and low vision in The Gambia. 1989. British Journal of Ophthalmology 73 82-87.                                                                                                 |
| West Africa            | Gambia     | national    | 1996                       | 5-99      | 13046          | both          | No    | Presenting                   | blind, low vision              | Faal H, Minassian DC, dolin PJ, Mohamed AA, Ajewole J, Johnson G.J.: Evaluation of a national eye care programme: re-survey after 10 years. 2000. British Journal of Ophthalmology. 84 948-951.                                                     |
| West Africa            | Gambia     | subnational | 2007                       | 50-99     |                | both          | Yes   | Presenting                   | blind, low vision              | Gambia 2007                                                                                                                                                                                                                                         |
| West Africa            | Ghana      | local       | 2001                       | 40-99     | 2298           | both          | No    | Both                         | blind, low vision              | Guzek JP, Anyomi FK, Fiadoyor S, Nyonator F.: Prevalence of blindness in people over 40 years in the Volta region of Ghana. 2005. Ghana Medical Journal. 39 (2) 55-62.                                                                              |
| West Africa            | Mali       | local       | 1990                       | 0-99      | 5871           | rural         | No    | Best-corrected               | blind                          | Kortlang C, Koster JCA, Coulibaly S, Dubbeldam RP.: Prevalence of blindness and visual impairment in the region of Segou, Mali. A baseline survey for a primary eye care programme. 1996. Tropical medicine and International Health. 1 (3) 314-319 |
| West Africa            | Mali       | subnational | 2002                       | 50-99     |                | both          | Yes   | Presenting                   | blind, low vision              | Cecon JF: Results of rapid assessment of cataract surgical services in Koulikoro, Mali. 2002. Institute of African Tropical Ophthalmology, Bamako Mali.                                                                                             |
| West Africa            | Mauritania | local       | 2002                       | 50-99     |                | urban         | Yes   | Presenting                   | blind, low vision              | Ahmedou SE. Results of rapid assessment of cataract surgical services in urban Nouackchott, Mauritania. 2001. Service Ophthalmologie, MOH, Nouackchott, Mauritania.                                                                                 |
| West Africa            | Nigeria    | local       | 1991                       | 0-99      | 2921           | rural         | No    | Both                         | blind                          | Adeoye A.: Survey of blindness in rural communities of south-western Nigeria. 1996. Tropical Medicine and International Health. 1 (5) 672-676.                                                                                                      |
| West Africa            | Nigeria    | subnational | 1992                       | 0-99      | 1752           | both          | No    | Best-corrected               | blind, low vision              | Ezepue UF.: Magnitude and causes of blindness and low vision in Anambra State of Nigeria (results of 1992 point prevalence survey). 1997. Public Health. 111 305-309.                                                                               |
| West Africa            | Nigeria    | local       | 1995                       | 0-99      | 3332           | both          | No    | Presenting                   | blind, low vision              | Abdu L.: Prevalence and causes of blindness and low vision in Dambatta local government area, Kano State Nigeria. Remainder of reference details not available on abstract.                                                                         |
| West Africa            | Nigeria    | subnational | 1999                       | 40-99     | 1461           | rural         | Yes   | Presenting                   | blind, low vision              | Rabiu, M. (2001). Cataract blindness and barriers to uptake of cataract surgery in a rural community of northern Nigeria. British Medical Journal 85(7): 776.                                                                                       |
| West Africa            | Nigeria    | local       | NS                         | 50-99     | 477            | rural         | Yes   | Presenting                   | blind                          | Oluleye TS.: Cataract Blindness and Barriers to Cataract Surgical Intervention in Three Rural Communities of Oyo State, Nigeria. 2004 13 (2) 156-160.                                                                                               |
| West Africa            | Nigeria    | local       | NS                         | 0-99      | 3204           | rural         | No    | Presenting                   | blind                          | Adeoti CO.: Prevalence and causes of blindness in a tropical African population. 2004. WAJM. 23 (3). 249-252.                                                                                                                                       |
| West Africa            | Nigeria    | local       | 2001                       | 50-99     | 684            | both          | Yes   | Presenting                   | blind                          | Patrick-Ferife G, Ashaye AO, Osuntokun OO. : Rapid assessment of cataract blindness among Ughelli clan in an urban/rural district of Delta State, Nigeria. 2005. Annals of African Medicine. 4 (2) 52-57.                                           |
| West Africa            | Nigeria    | local       | 2002                       | 8-92      | 2201           | rural         | No    | Presenting                   | blind                          | Adegbehingbe BO, Majengbasan TO.: Ocular health status of rural dwellers in south-western Nigeria. 2007. Aust J Rural Health. 15 269-272.                                                                                                           |

| GBD Region                   | Country                        | Coverage    | Years (NS = not specified) | Age range | Total examined | Urban / rural | Rapid | Presenting or best-corrected | Core visual acuity levels used | Reference                                                                                                                                                                                                                                                                       |
|------------------------------|--------------------------------|-------------|----------------------------|-----------|----------------|---------------|-------|------------------------------|--------------------------------|---------------------------------------------------------------------------------------------------------------------------------------------------------------------------------------------------------------------------------------------------------------------------------|
| West Africa                  | Nigeria                        | local       | 2002                       | 4-24      | 1144           | both          | No    | Presenting                   | blind, low vision              | Ajaiyeoba AI, Isawumi MA, Adeoye AO, Oluleye TS.: Pattern of eye disease and visual impairment among students in southwestern Nigeria. 2007. Int Ophthalmol. 27 287-292.                                                                                                        |
| West Africa                  | Nigeria                        | local       | NS                         | 0-99      | 1248           | rural         | No    | Presenting                   | blind, low vision              | Onakpoya OH, Adeoye AO, Akinsola FB, Adegbehingbe.: Prevalence of blindness and visual impairment in Atakunmosa West Local Government Area of southwestern Nigeria. 2007. Tanzania Health Research Bulletin. 9 (2) 126-131.                                                     |
| West Africa                  | Nigeria                        | local       | 2005                       | 0-99      | 4848           | rural         | No    | Presenting                   | blind, low vision              | Muhammad N, Mansur RM, Dantani AM, Elhassan E, Isiyaku S. Prevalence and causes of blindness and visual impairment in sokoto state, Nigeria: baseline data for vision 2020: the right to sight eye care programme.. Middle East Afr J Ophthalmol. 20                            |
| West Africa                  | Nigeria                        | subnational | 2006                       | 1-97      | 3357           | rural         | No    | Presenting                   | blind                          | Mpyet C, Ogoshi C, Goyol M. : Prevalence of Trachoma in Yobe State, North-Eastern Nigeria. 2008. Ophthalmic Epidemiology. 15, 303-307.                                                                                                                                          |
| West Africa                  | Nigeria                        | national    | 2007                       | 40-99     | 13599          | both          | No    | Both                         | blind, low vision              | Kyari, F., M. V. S. Gudlavalleti, et al. (2009). Prevalence of Blindness and Visual Impairment in Nigeria: The national blindness and visual impairment survey. Investigative Ophthalmology & Visual Science 50(5): 2033                                                        |
| West Africa                  | Sierra Leone                   | national    | 2010-2011                  | 50-99     | 2976           | both          | Yes   | Both                         | blind, low vision              | SIERRA LEONE RAPID DATA<br>Buch, H., T. Vinding, et al. (2001). Prevalence and causes of visual impairment according to World Health Organization and United States criteria in an aged, urban Scandinavian population: the Copenhagen City Eye Study. Ophthalmology 108(12): 2 |
| Western Europe               | Denmark                        | local       | 1986-1988                  | 60-80     | 946            | urban         | No    | Both                         | blind, low vision              | Laitinen, A., S. Koskinen, et al. (2005). A nationwide population-based survey on visual acuity, near vision, and self-reported visual function in the adult population in Finland. Ophthalmology 112, 2227-2237.                                                               |
| Western Europe               | Finland                        | national    | 2000-2001                  | 30-99     | 6663           | both          | No    | Presenting                   | blind                          |                                                                                                                                                                                                                                                                                 |
| Western Europe               | France                         | local       | NS                         | 65-99     | 702            | urban         | No    | Best-corrected               | blind, low vision              | Seland, Vingerling, Augood, Bentham, Chakravarthy et al. (2009) Visual Impairment and quality of life in the Older European Population, the EUREYE study Act Ophth 2009                                                                                                         |
| Western Europe               | Greece                         | local       | NS                         | 65-99     | 586            | urban         | No    | Best-corrected               | blind, low vision              | Seland, Vingerling, Augood, Bentham, Chakravarthy et al. (2009) Visual Impairment and quality of life in the Older European Population, the EUREYE study Act Ophth 2009                                                                                                         |
| Western Europe               | Iceland                        | local       | 1996                       | 50-99     | 1635           | urban         | No    | Best-corrected               | blind, low vision              | Gunnlaugsdottir E, Arnarsson A, Jonasson F. Prevalence and causes of visual impairment and blindness in Icelanders aged 50 years and older: the Reykjavik Eye Study. Acta Ophthalmol. 2008 Nov;86(7):778-85.                                                                    |
| North Africa and Middle East | Occupied Palestinian Territory | local       | 1982-1983                  | 0-99      | 9054           | both          | No    | Presenting                   | blind, low vision              | Thomson I M, Chumbley L C. Eye disease in the West Bank and Gaza strip. Br J Ophthalmol 1984;68:598-602                                                                                                                                                                         |
| Western Europe               | Italy                          | local       | 1988                       | 40-87     | 538            | rural         | No    | Best-corrected               | blind, low vision              | Cedrone, C., F. Ricci, et al. (2007). Age-specific changes in the prevalence of best-corrected visual impairment in an Italian population. Ophthalmic Epidemiology 14(5): 320-326.                                                                                              |
| Western Europe               | Italy                          | local       | 2000                       | 40-99     | 845            | urban         | No    | Both                         | blind, low vision              | Cedrone, C., C. Nucci, et al. (2005). Prevalence of blindness and low vision in an Italian population: a comparison with other European studies. Eye 20(6): 661-667.                                                                                                            |
| Western Europe               | Italy                          | local       | NS                         | 65-99     | 601            | urban         | No    | Best-corrected               | blind, low vision              | Seland, Vingerling, Augood, Bentham, Chakravarthy et al. (2009) Visual Impairment and quality of life in the Older European Population, the EUREYE study Act Ophth 2009                                                                                                         |
| Western Europe               | Netherlands                    | local       | 1990-1993                  | 55-99     |                | urban         | No    | Best-corrected               | blind, low vision              | Klaver, C. C., R. C. Wolfs, et al. (1998). Age-specific prevalence and causes of blindness and visual impairment in an older population: the Rotterdam Study. Archives of Ophthalmology 116(5): 653-8.                                                                          |
| Western Europe               | Netherlands                    | local       | 1997-1999                  | 85-99     | 459            | both          | No    | Presenting                   | low vision                     | Gussekloo, J., A. J. de Craen, et al. (2005). Sensory impairment and cognitive functioning in oldest-old subjects: the Leiden 85+ Study. American Journal of Geriatric Psychiatry 13, 781-6.                                                                                    |
| Western Europe               | Norway                         | local       | NS                         | 65-99     | 737            | urban         | No    | Best-corrected               | blind, low vision              | Seland, Vingerling, Augood, Bentham, Chakravarthy et al. (2009) Visual Impairment and quality of life in the Older European Population, the EUREYE study Act Ophth 2009                                                                                                         |
| Western Europe               | Spain                          | local       | NS                         | 64-97     | 1144           | both          | No    | Best-corrected               | blind, low vision              | Esteban, J. J., M. S. Martinez, et al. (2008). Visual impairment and quality of life: gender differences in the elderly in Cuenca, Spain. Quality of Life Research 17, 37-45.                                                                                                   |
| Western Europe               | Spain                          | local       | 2007                       | 40-79     | 510            | urban         | No    | Best-corrected               | blind, low vision              | Anton A et al. Epidemiology of Refractive Errors in an Adult European Population: The Segovia Study (Spain) 2009 Ophth Epi, Vol. 16, No. 4, Pages 231-237                                                                                                                       |
| Western Europe               | United Kingdom                 | national    | 1980                       | 10-12     | 12853          | both          | No    | Presenting                   | low vision                     | Stewart-Brown, S. and N. Butler (1985). Visual acuity in a national sample of 10 year old children. Journal of Epidemiology & Community Health 39(2): 107-12.                                                                                                                   |



| GBD Region     | Country        | Coverage | Years (NS = not specified) | Age range | Total examined | Urban / rural | Rapid | Presenting or best-corrected | Core visual acuity levels used | Reference                                                                                                                                                                       |
|----------------|----------------|----------|----------------------------|-----------|----------------|---------------|-------|------------------------------|--------------------------------|---------------------------------------------------------------------------------------------------------------------------------------------------------------------------------|
| Western Europe | United Kingdom | local    | 1982-1984                  | 75-99     | 529            | both          | No    | Best-corrected               | blind, low vision              | Gibson, J. M., J. R. Lavery, et al. (1986). Blindness and partial sight in an elderly population. <i>British Journal of Ophthalmology</i> 70, 700-5.                            |
| Western Europe | United Kingdom | local    | NS                         | 65-99     | 207            | urban         | No    | Presenting                   | blind, low vision              | Wormald, R. P., L. A. Wright, et al. (1992). Visual problems in the elderly population and implications for services.[see comment]. <i>BMJ</i> 304, 1226-9.                     |
| Western Europe | United Kingdom | national | 1994-1995                  | 65-99     | 1362           | both          | No    | Presenting                   | low vision                     | van der Pols, J. C., C. J. Bates, et al. (2000). Visual acuity measurements in a national sample of British elderly people. <i>British Journal of Ophthalmology</i> 84, 165-70. |
| Western Europe | United Kingdom | local    | NS                         | 65-99     | 629            | urban         | No    | Best-corrected               | blind, low vision              | Seland, Vingerling, Augood, Bentham, Chakravarthy et al. (2009) Visual Impairment and quality of life in the Older European Population, the EUREYE study <i>Act Ophth</i> 2009  |

Table C. Coefficients for conversion to core levels of vision impairment.

|                                                      | Intercept |                | Coefficient |                | N    | Adjusted R-squared |
|------------------------------------------------------|-----------|----------------|-------------|----------------|------|--------------------|
|                                                      | Value     | Standard error | Value       | Standard error |      |                    |
| <i>Conversion to blind (&lt;3/60)</i>                |           |                |             |                |      |                    |
| from <6/60                                           | -1.024    | 0.032          | 0.911       | 0.010          | 944  | 0.895              |
| from ≤6/60                                           | -1.213    | 0.139          | 0.813       | 0.030          | 76   | 0.905              |
| <i>Conversion to low vision (&lt;6/18 and ≥3/60)</i> |           |                |             |                |      |                    |
| from <6/18                                           | -0.524    | 0.014          | 0.898       | 0.005          | 1270 | 0.965              |
| from <6/12                                           | -1.280    | 0.057          | 0.837       | 0.021          | 85   | 0.951              |

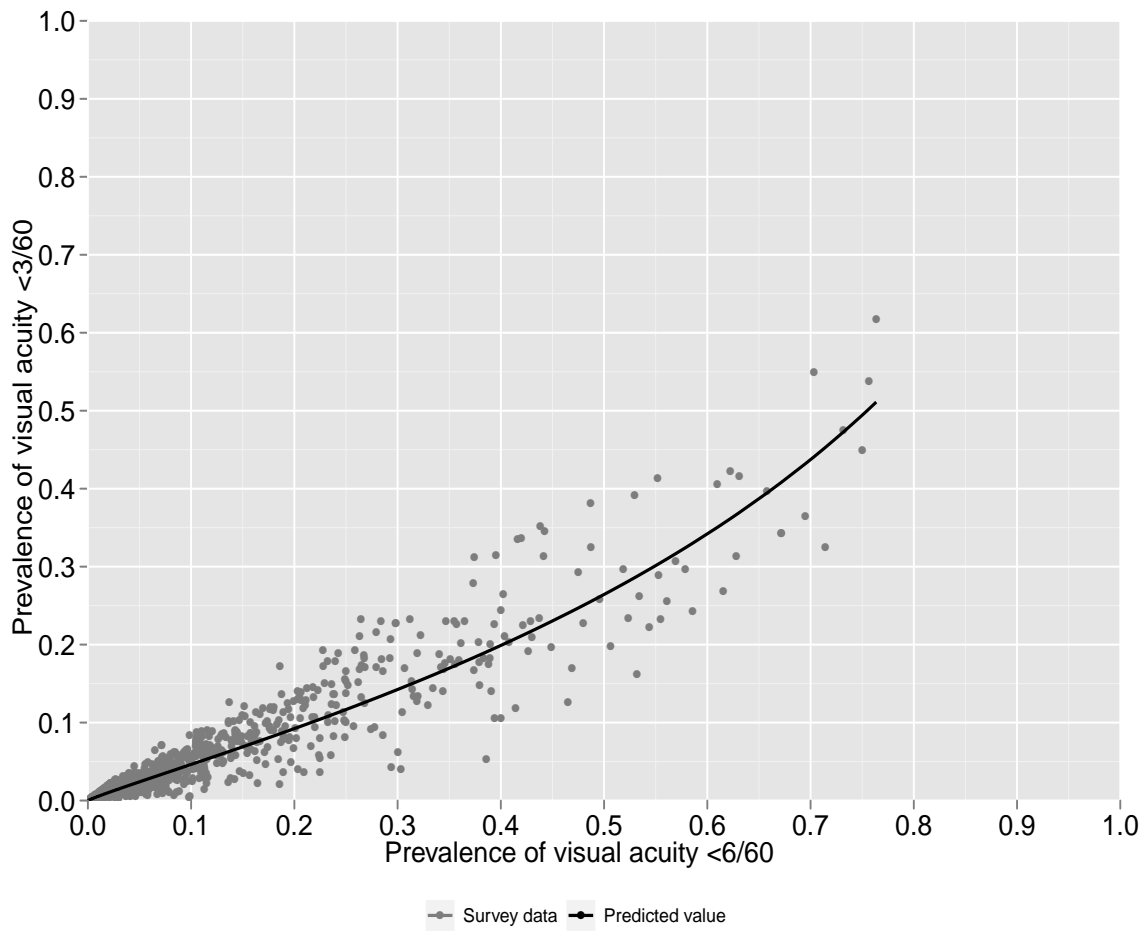

Figure A: Conversion from visual acuity < 6/60 to blind (< 3/60)

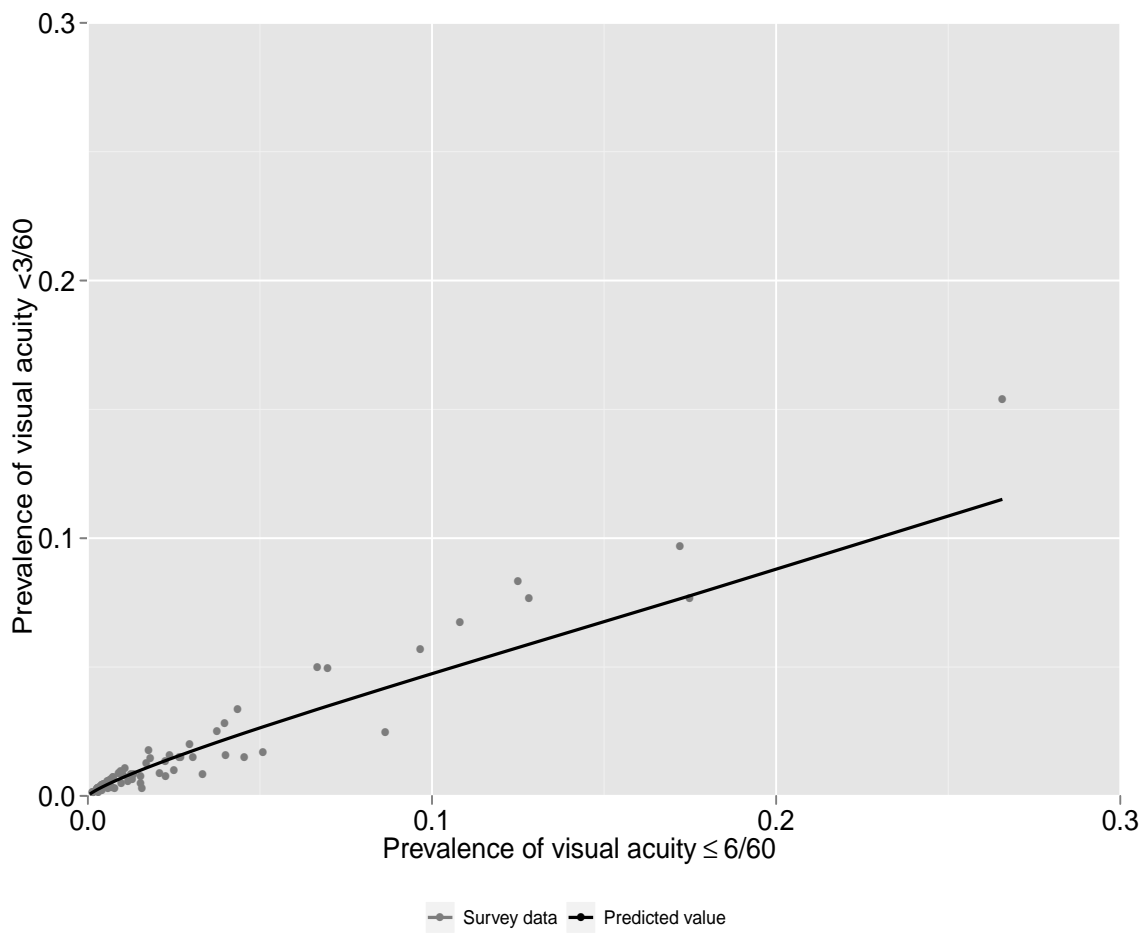

Figure B: Conversion from visual acuity  $\leq$  6/60 to blind (< 3/60)

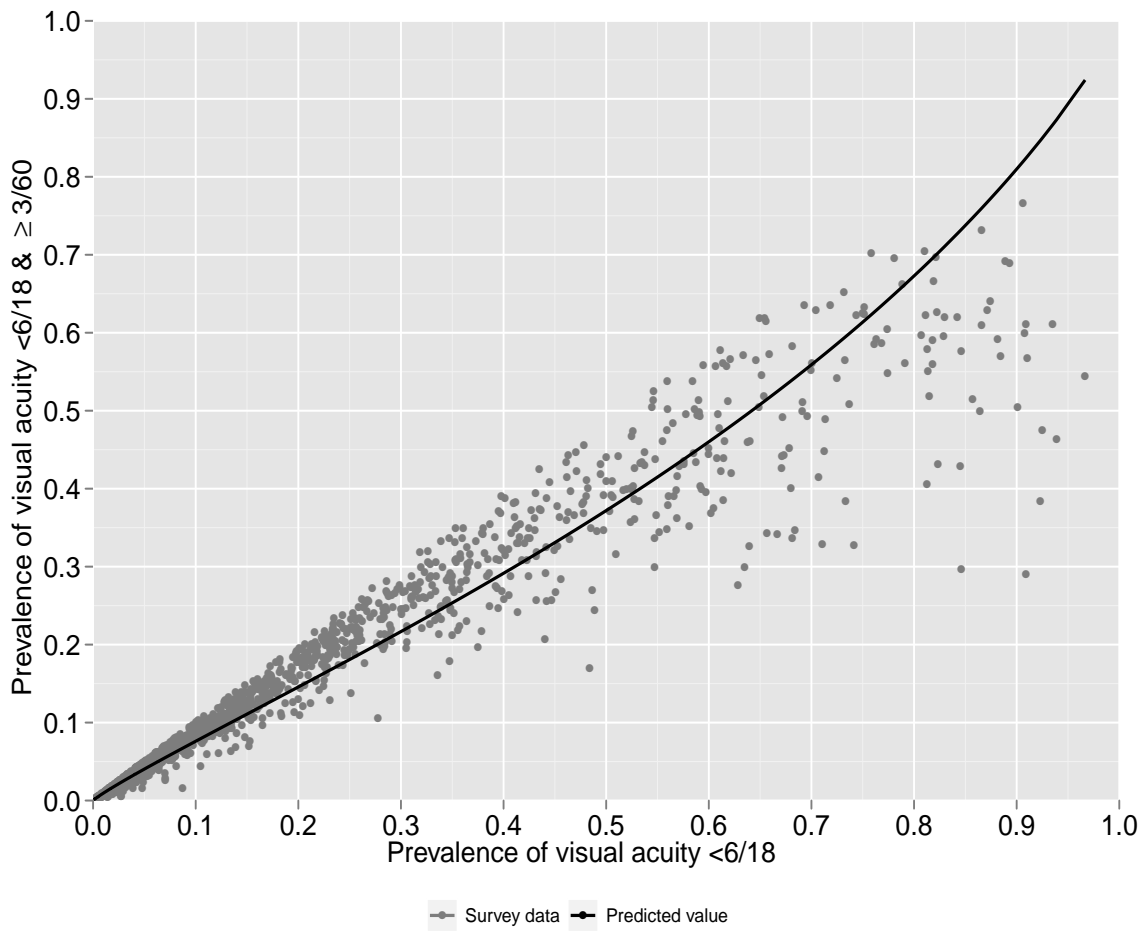

Figure C: Conversion from visual acuity  $<6/18$  to MSVI ( $<6/18$  and  $\geq 3/60$ )

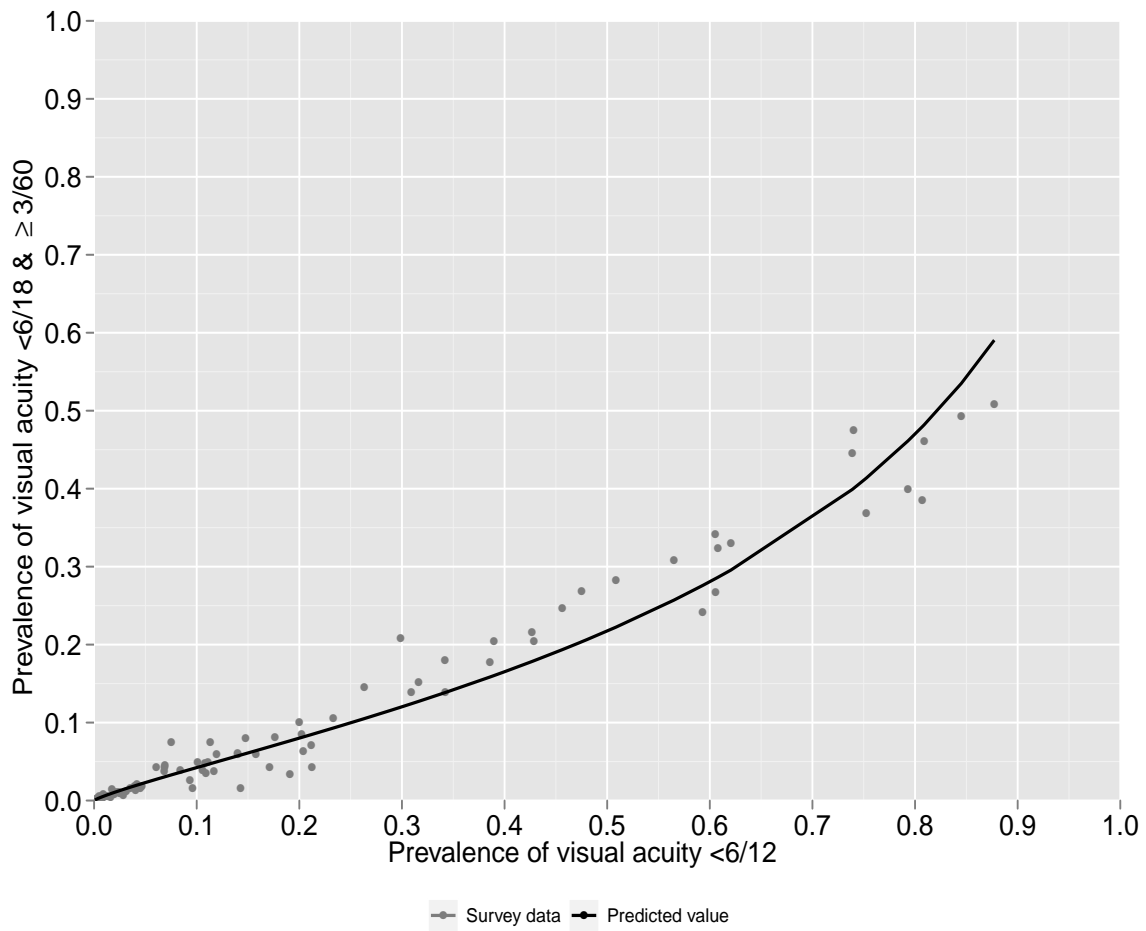

Figure D: Conversion from visual acuity <6/12 to MSVI (< 6/18 and  $\geq$ 3/60)

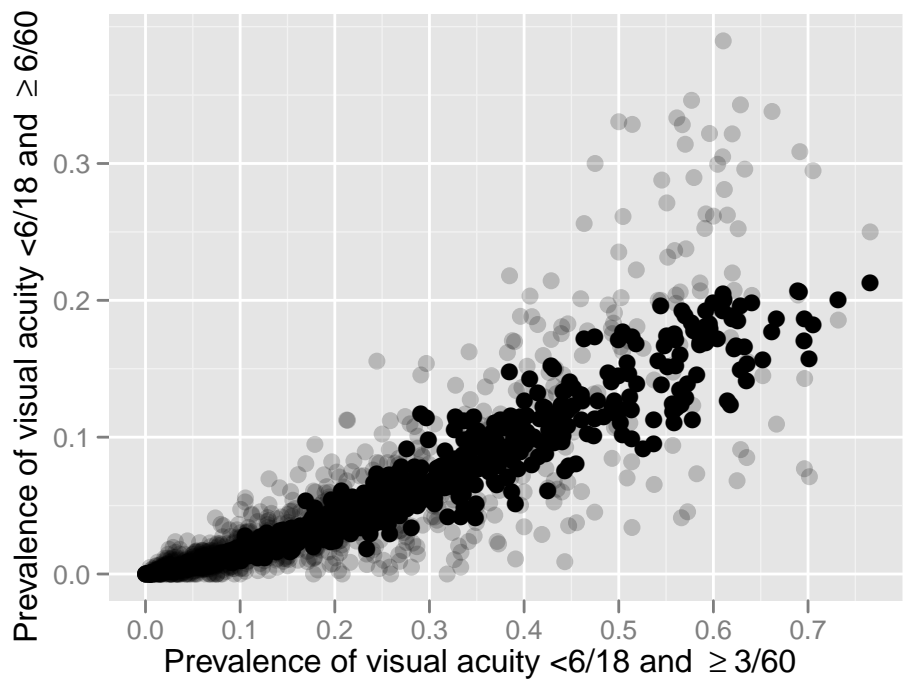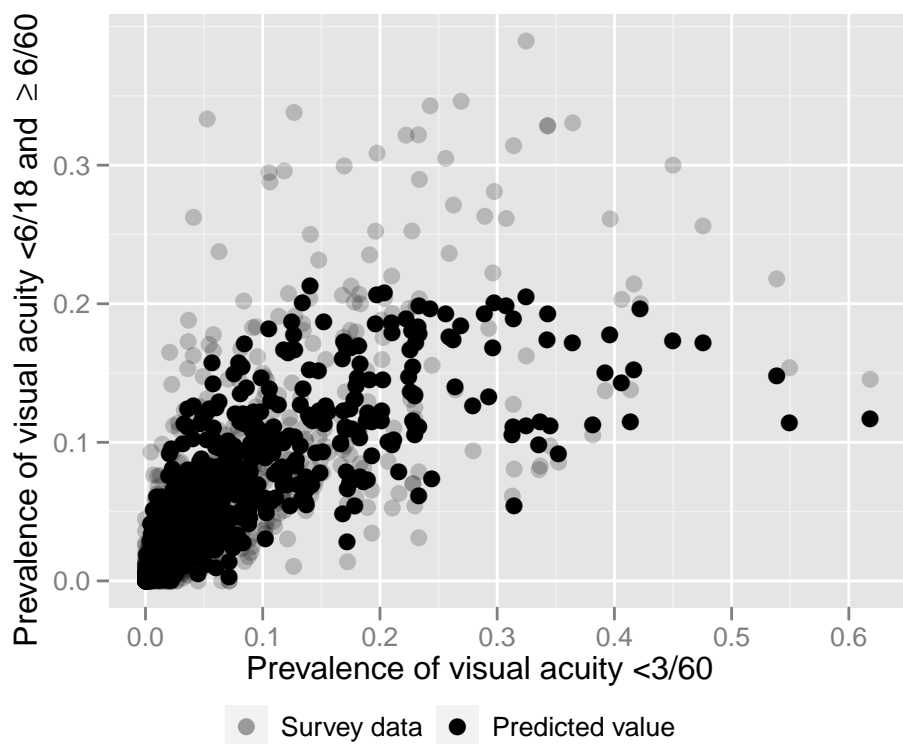

Figure E: Prediction of severe vision impairment prevalence from MSVI and blind prevalence

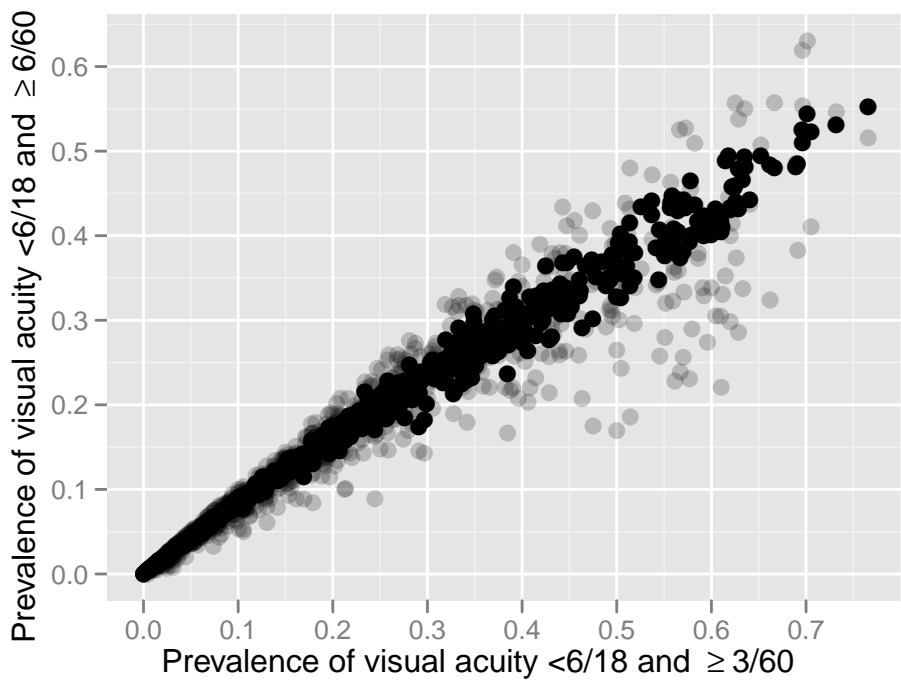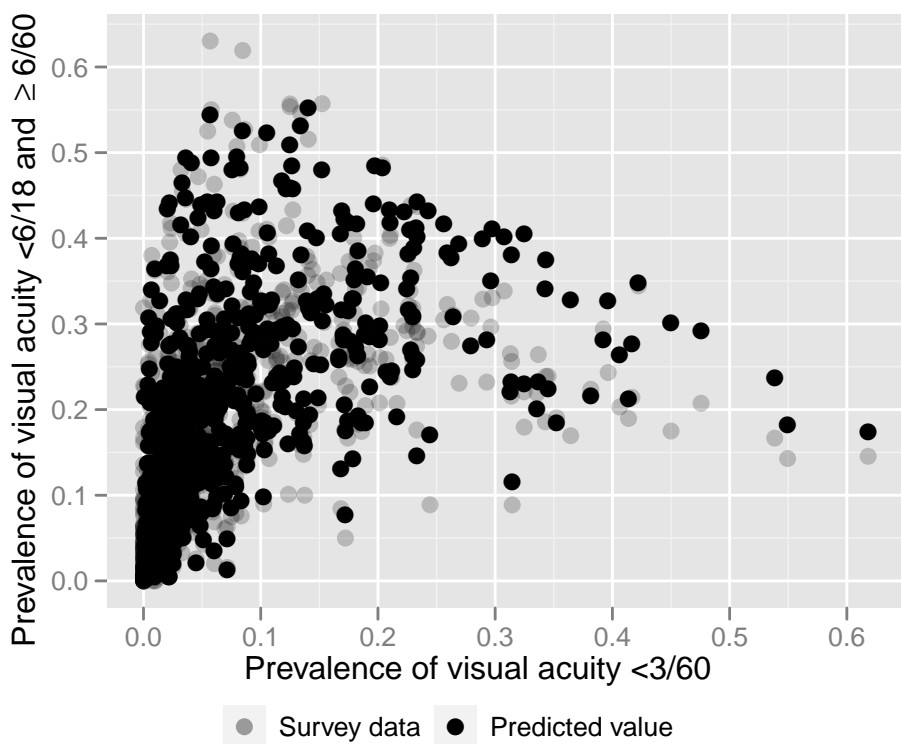

Figure F: Prediction of moderate vision impairment prevalence from MSVI and blind prevalence



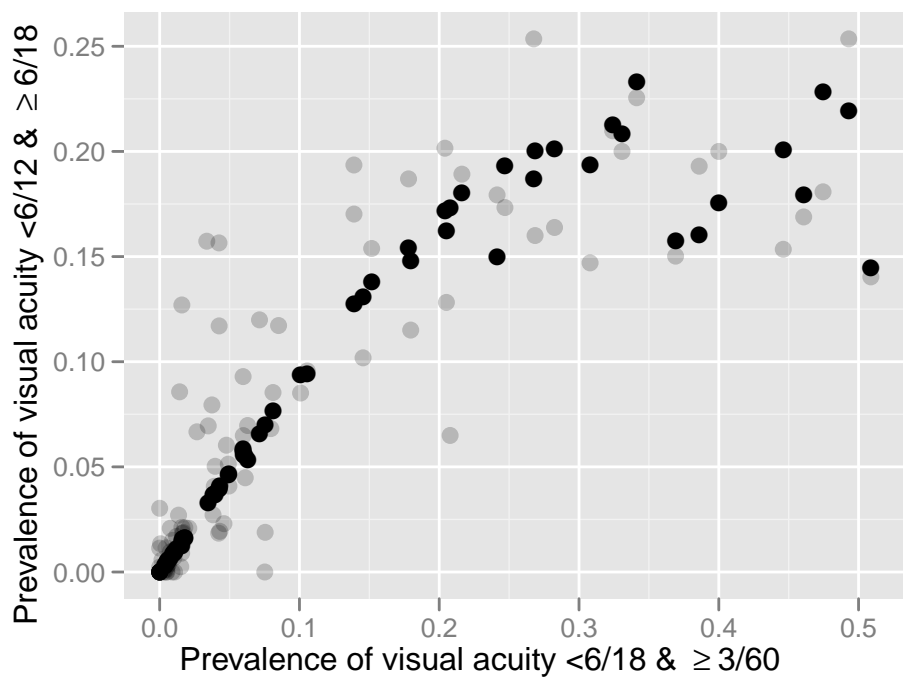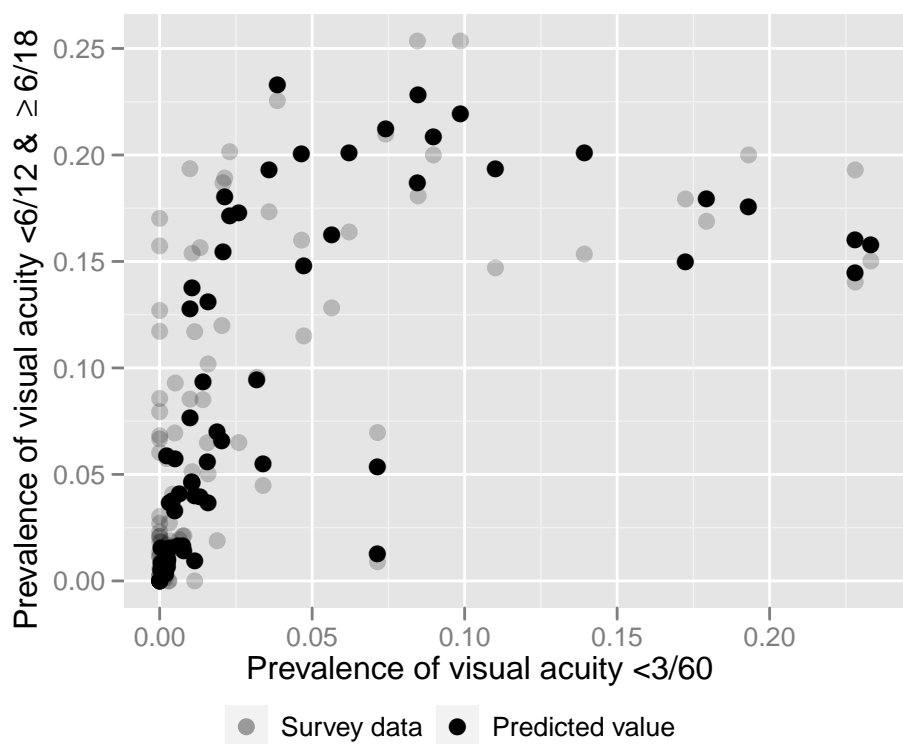

Figure G: Prediction of mild vision impairment prevalence from MSVI and blind prevalence

Figure H Survey data and model estimates. The model's central estimate is shown in red, and the shaded grey area shows the 95% uncertainty interval.

+ Presenting  
+ Best corrected

— National  
— Sub-national

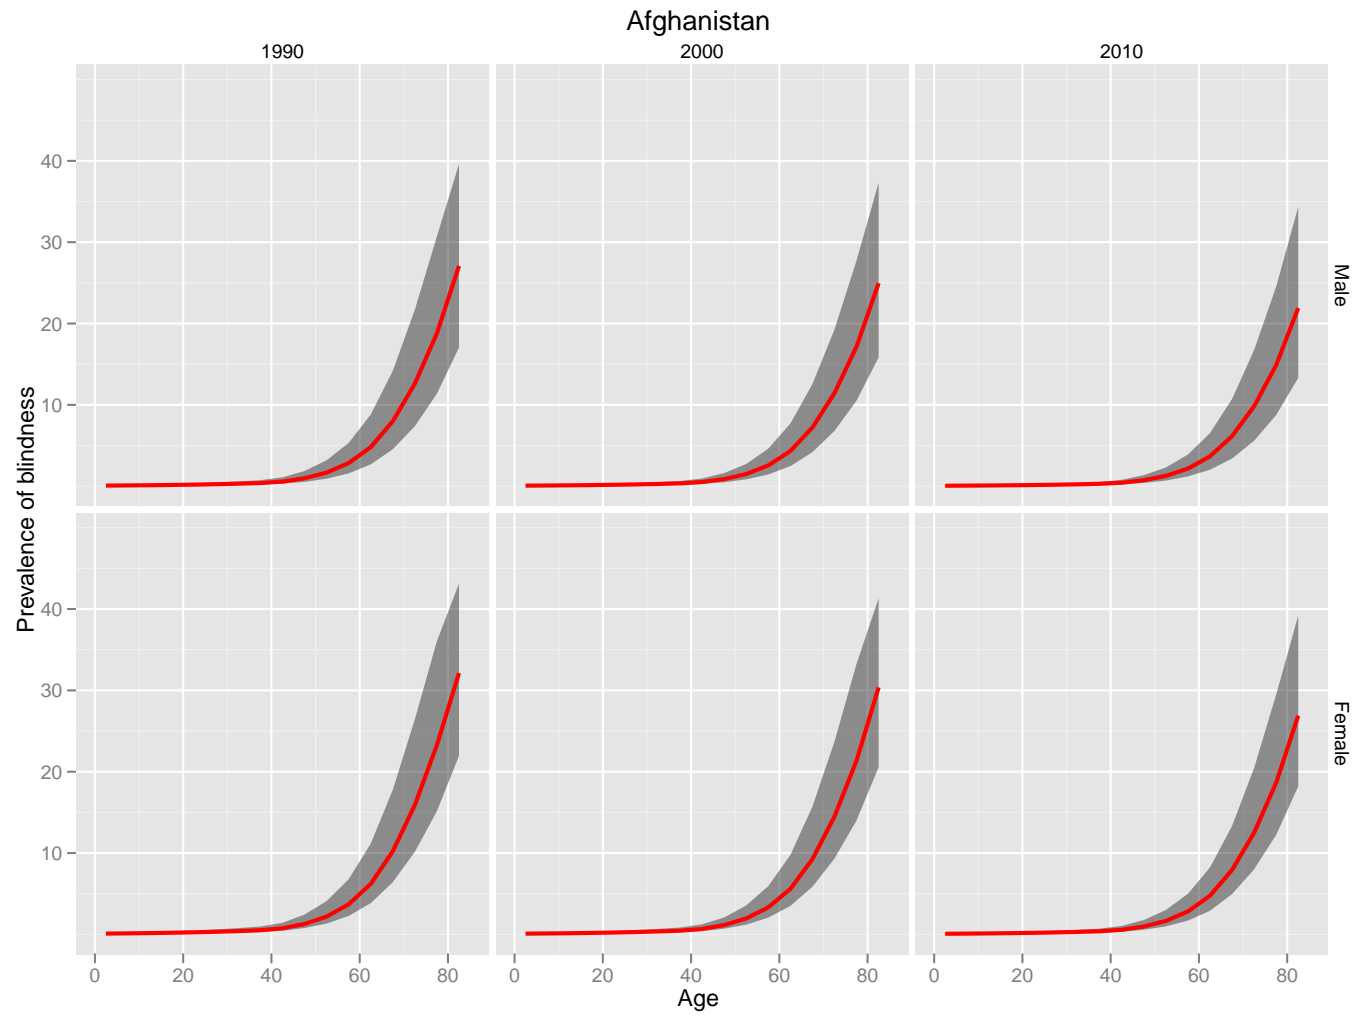

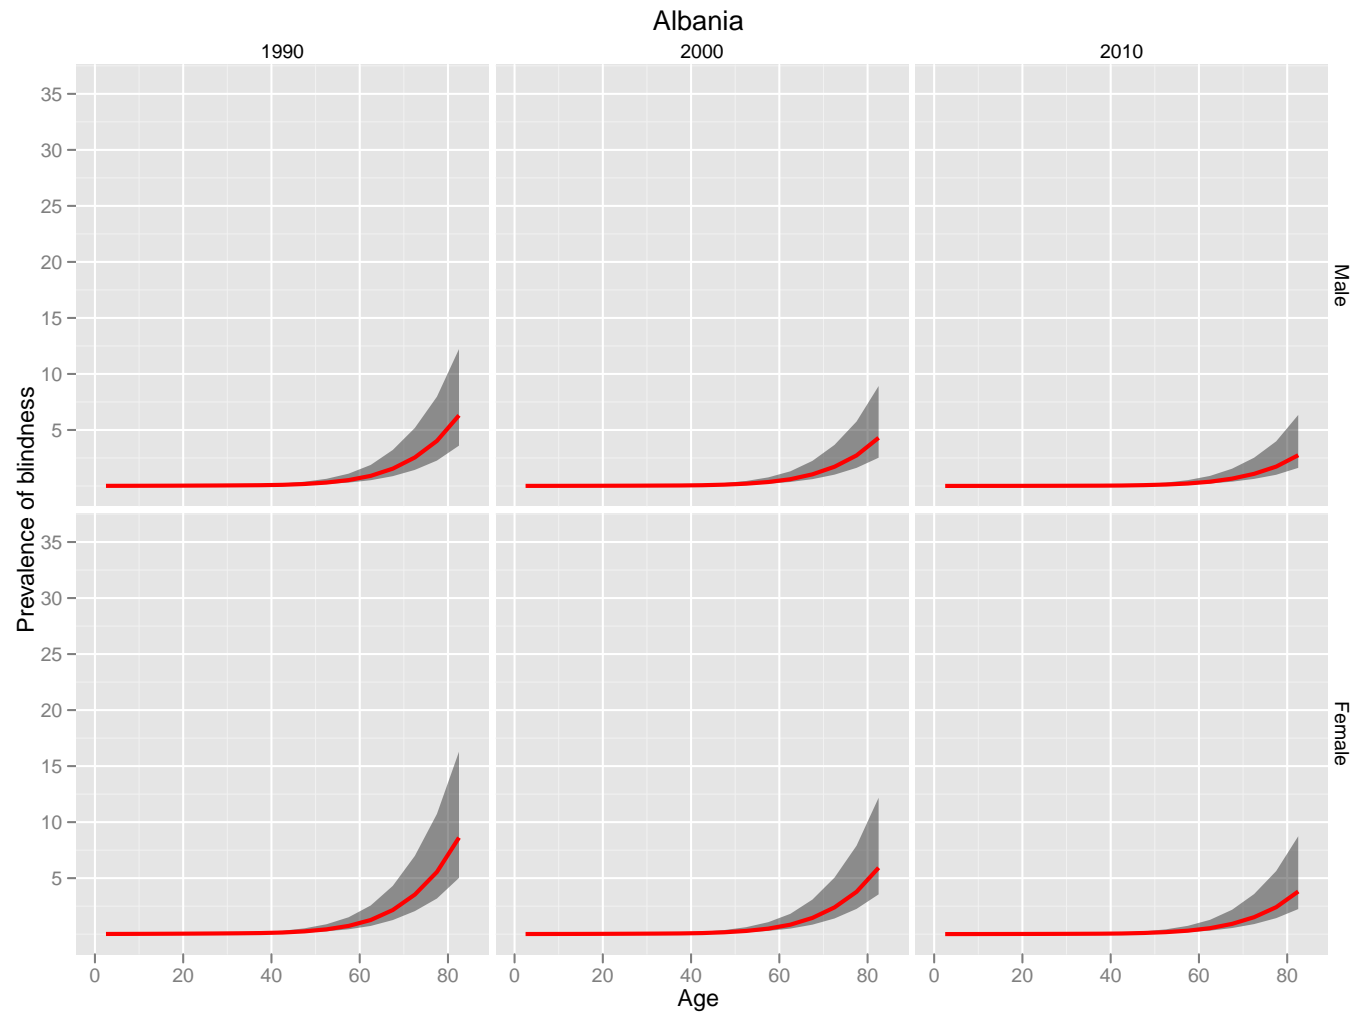

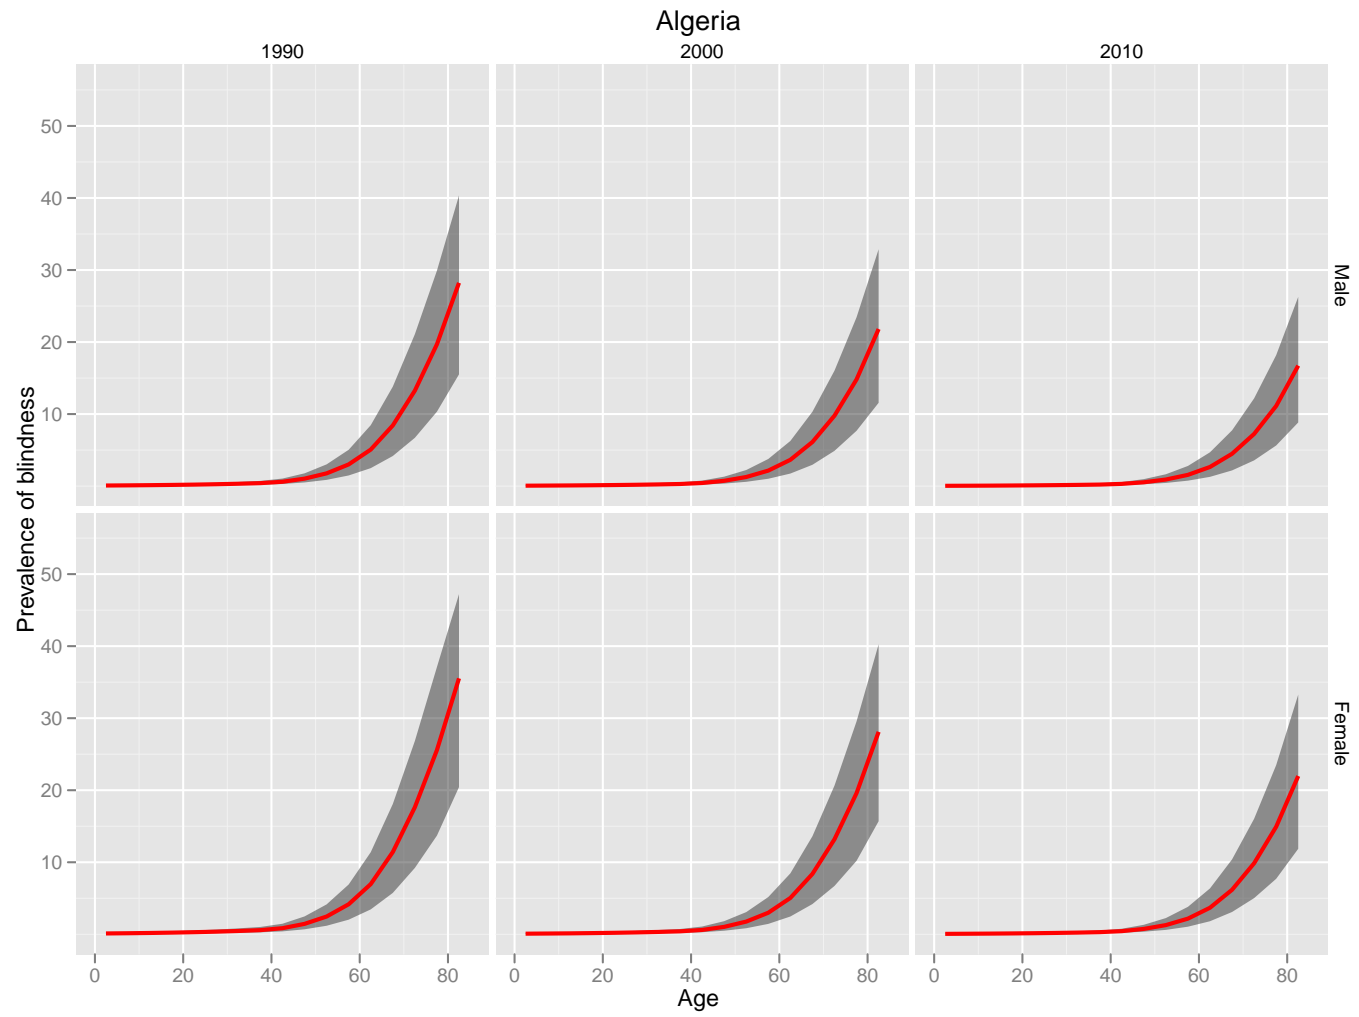

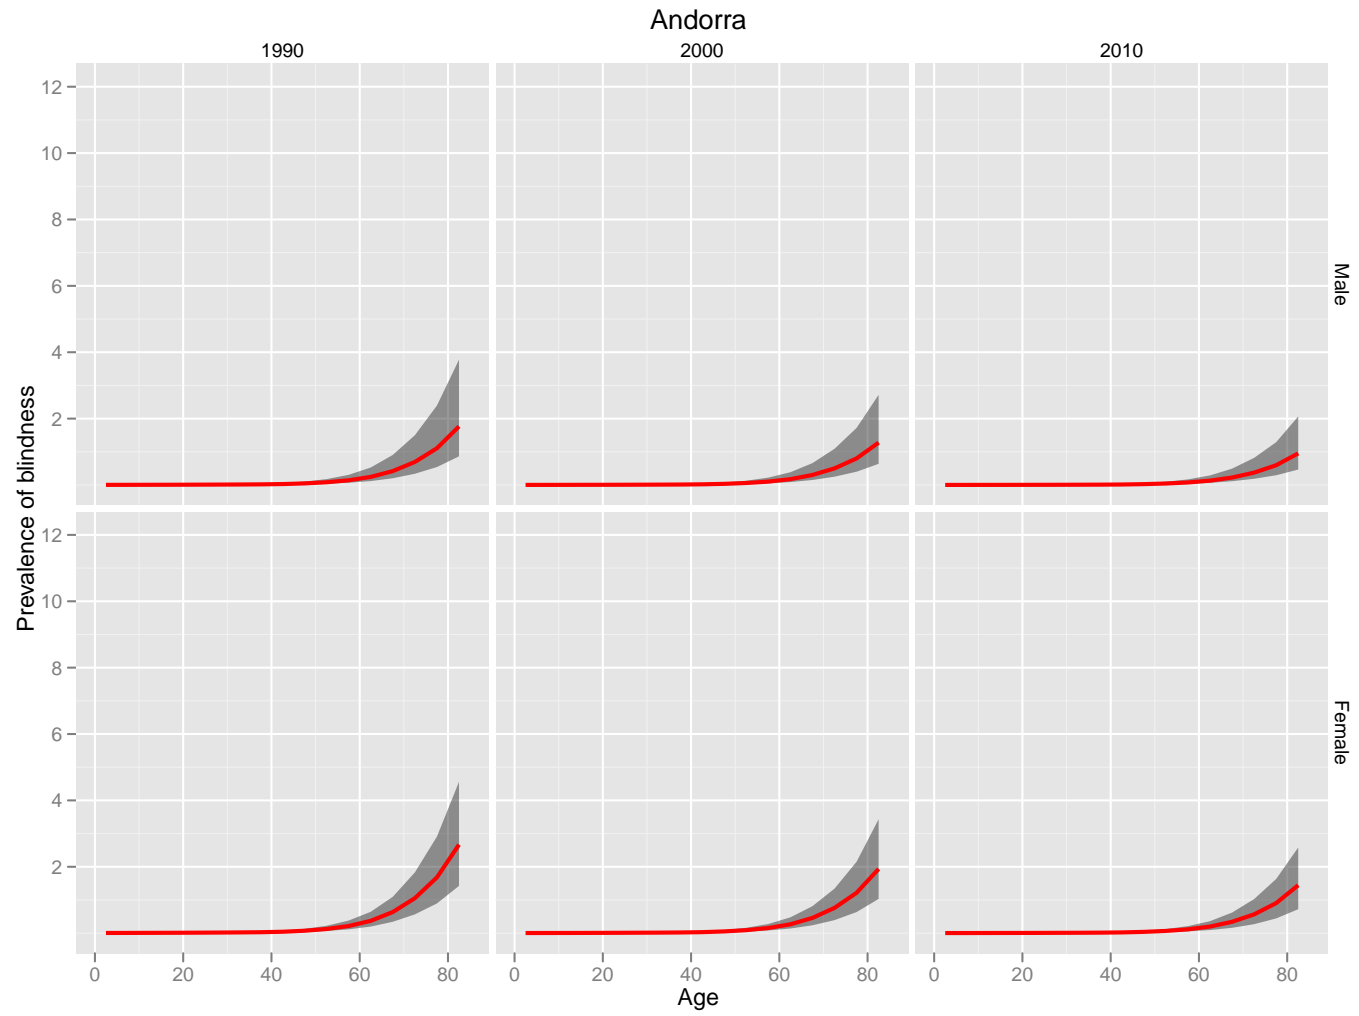

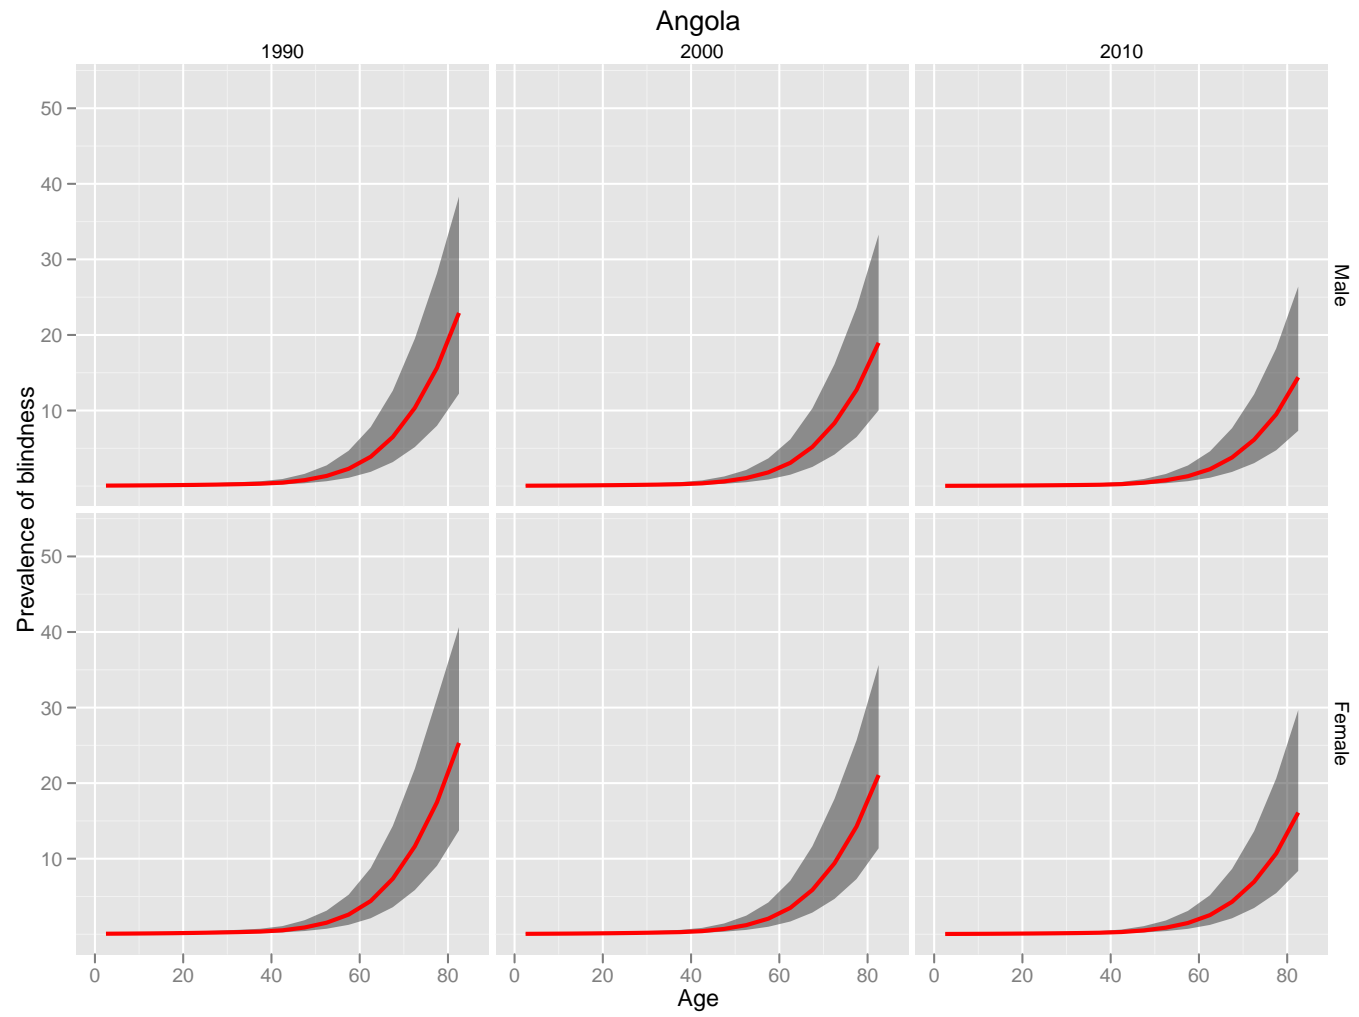



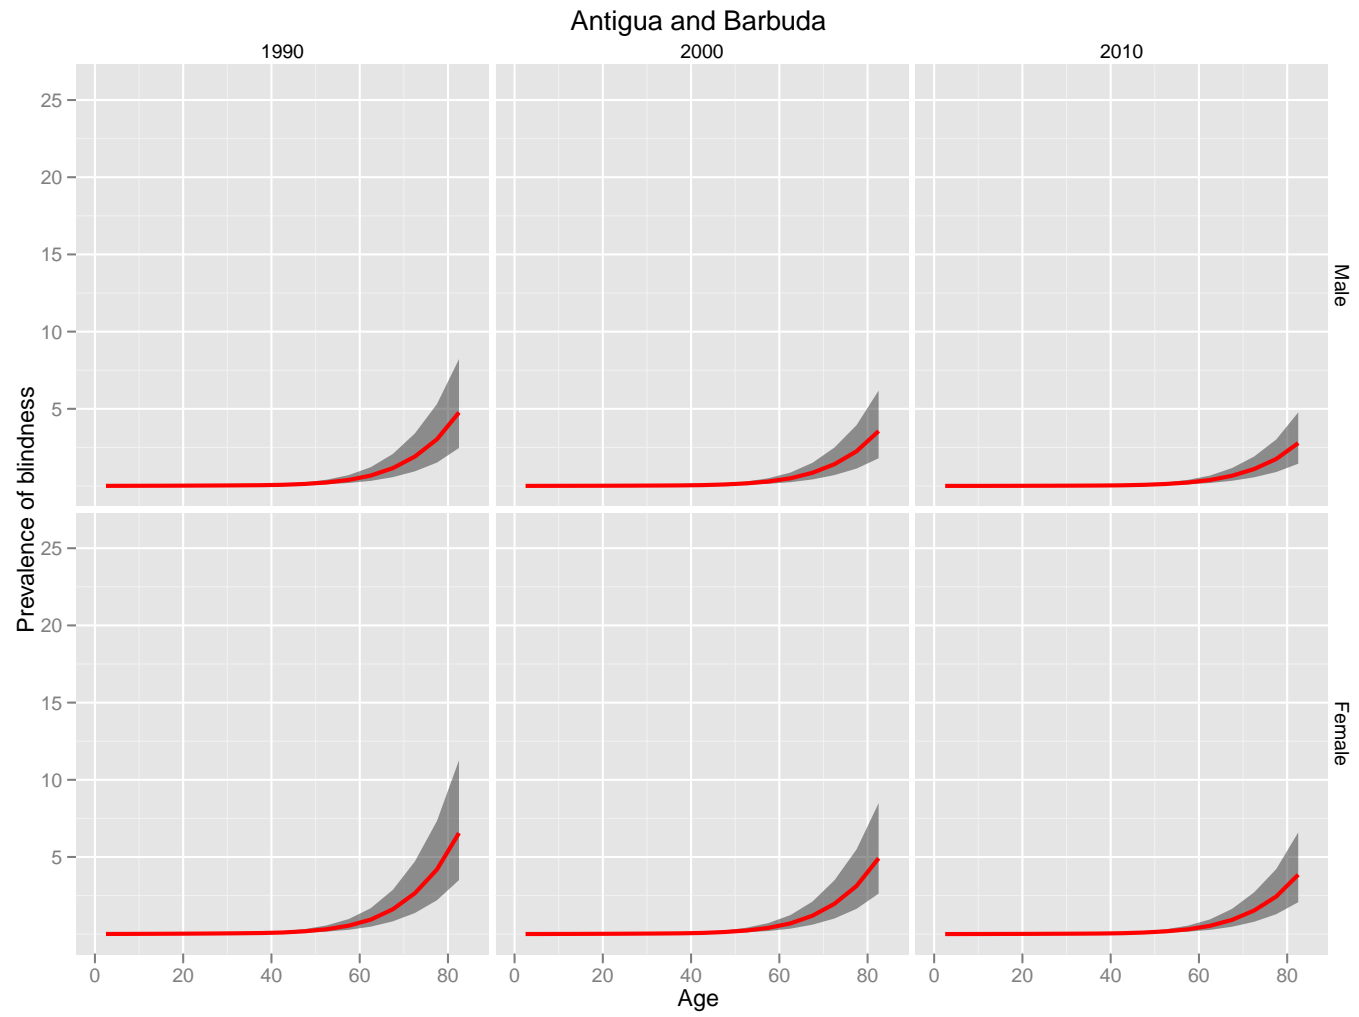

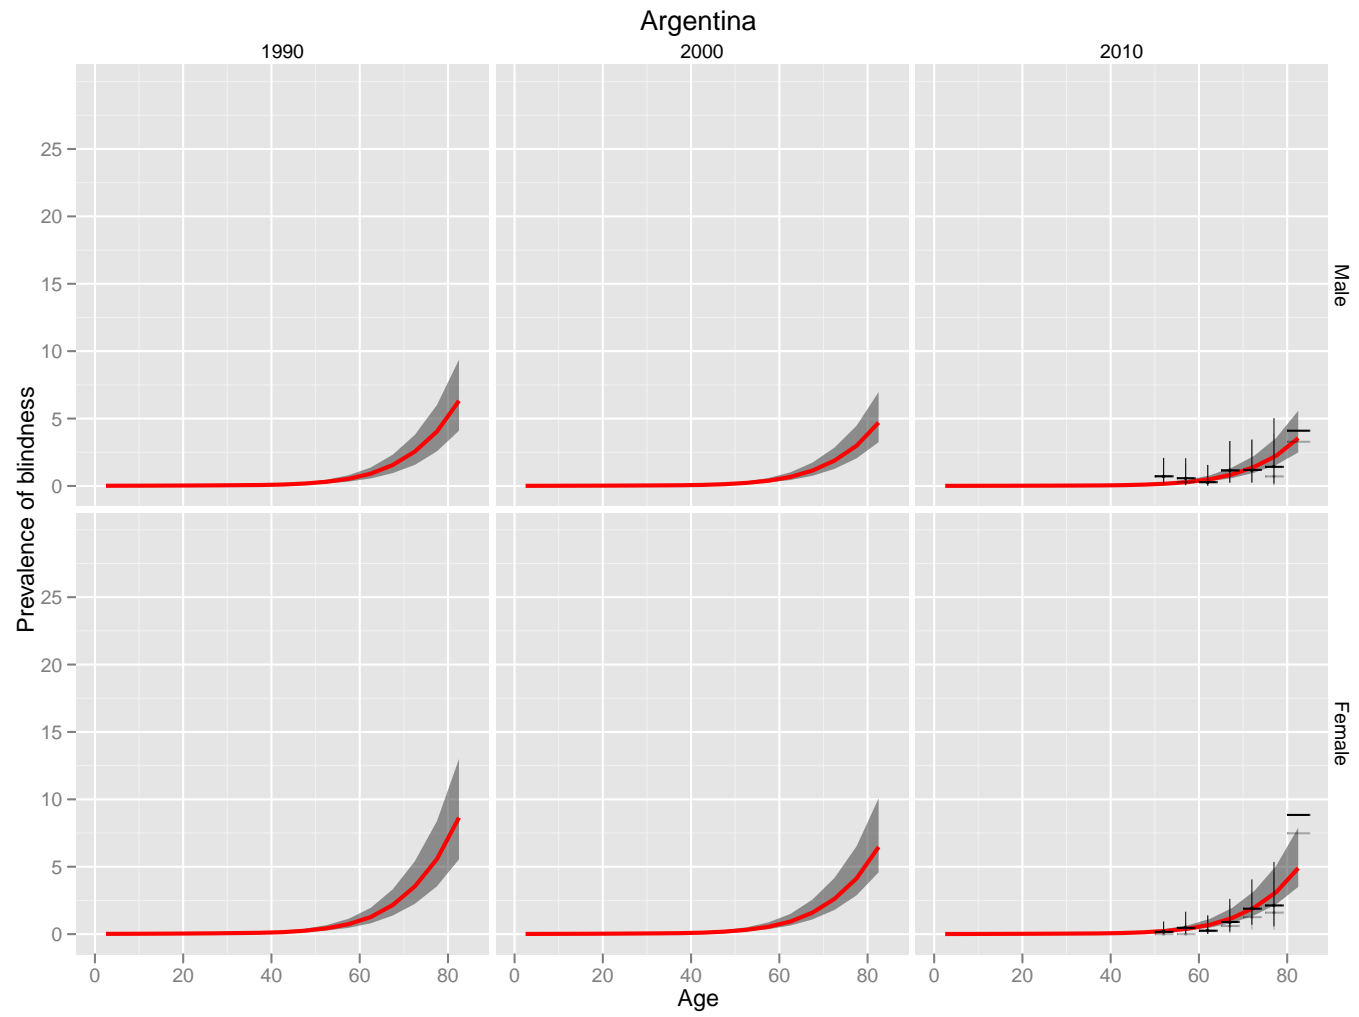

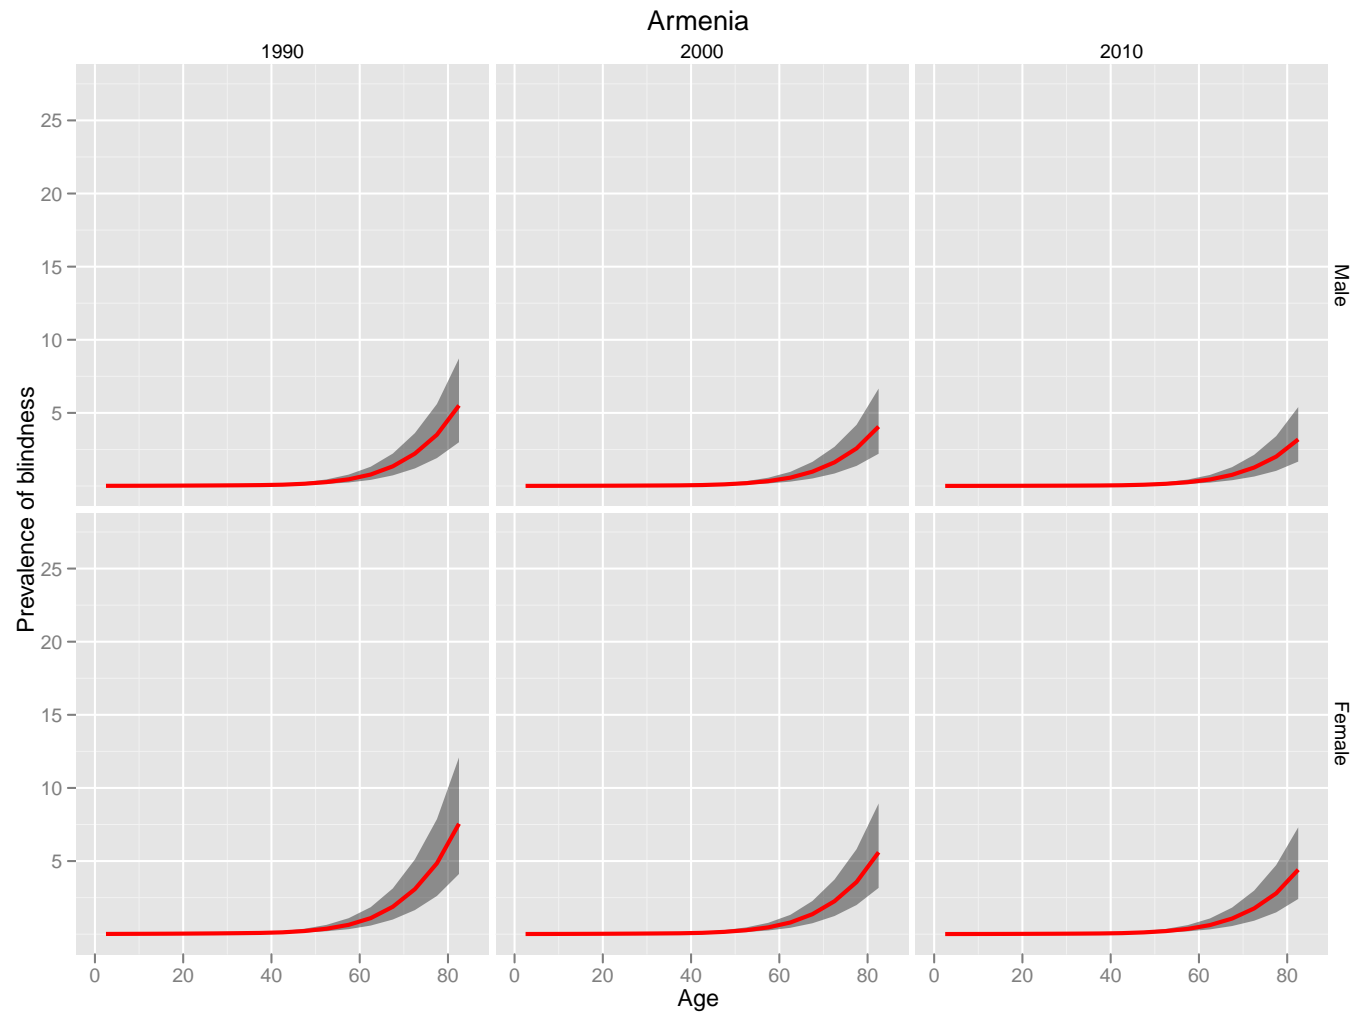

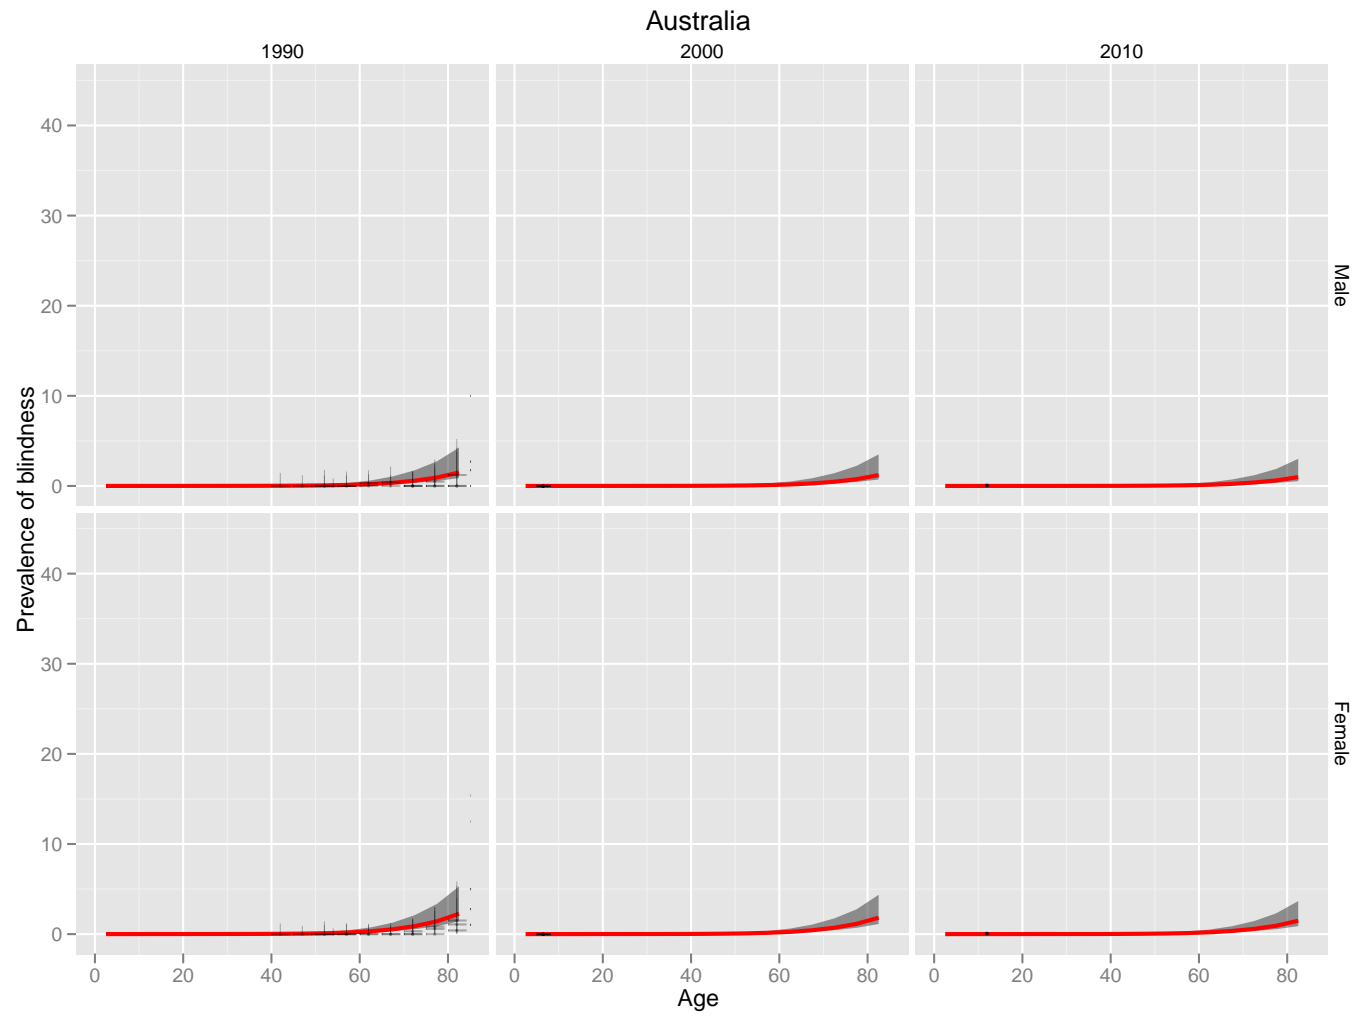

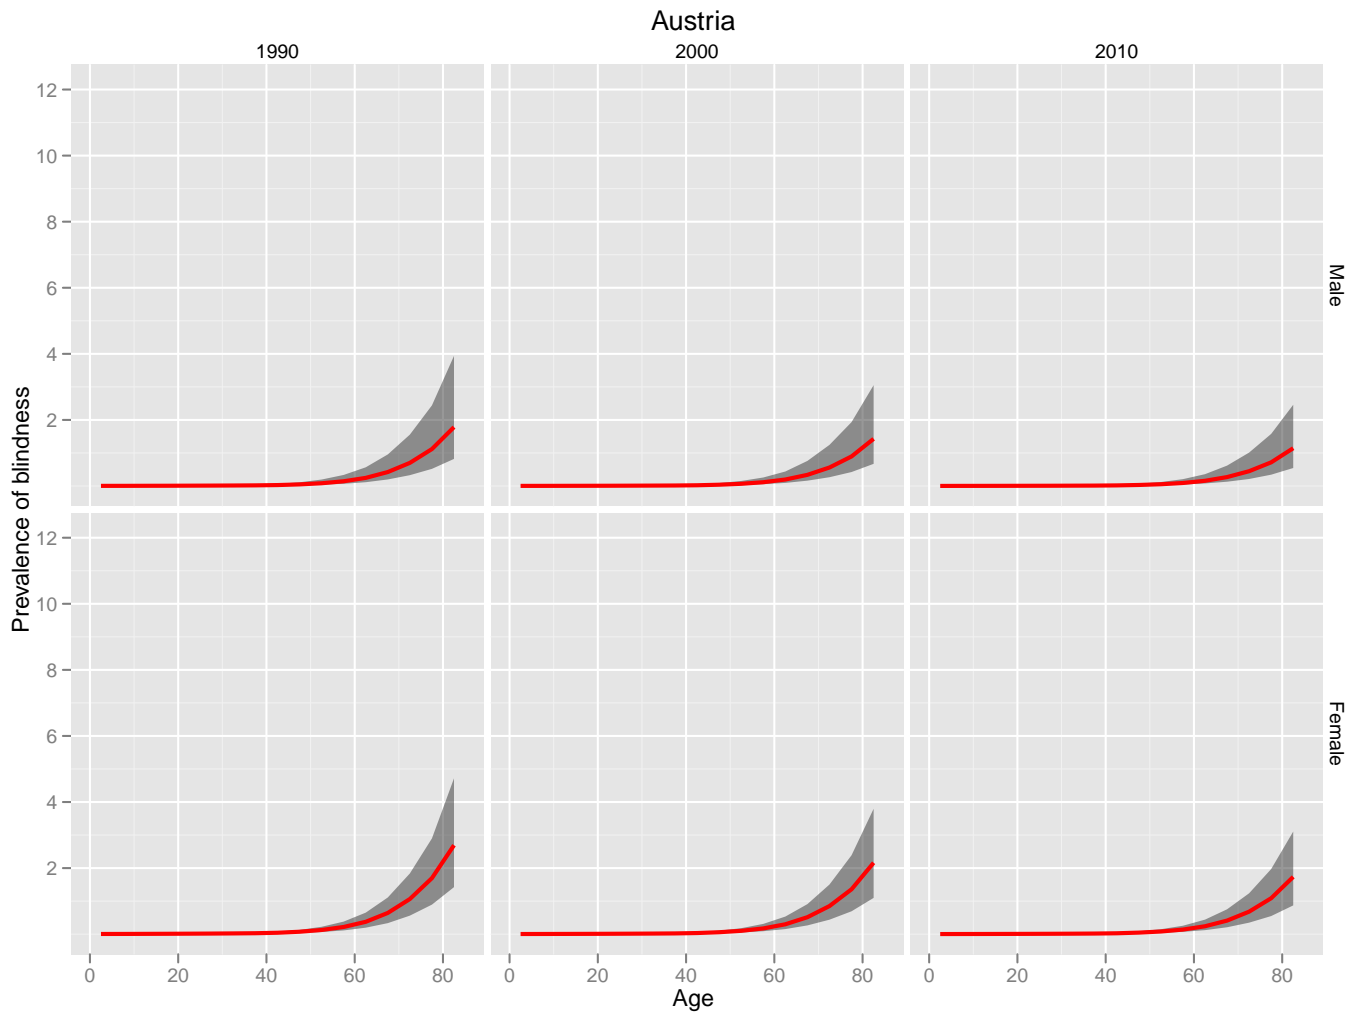

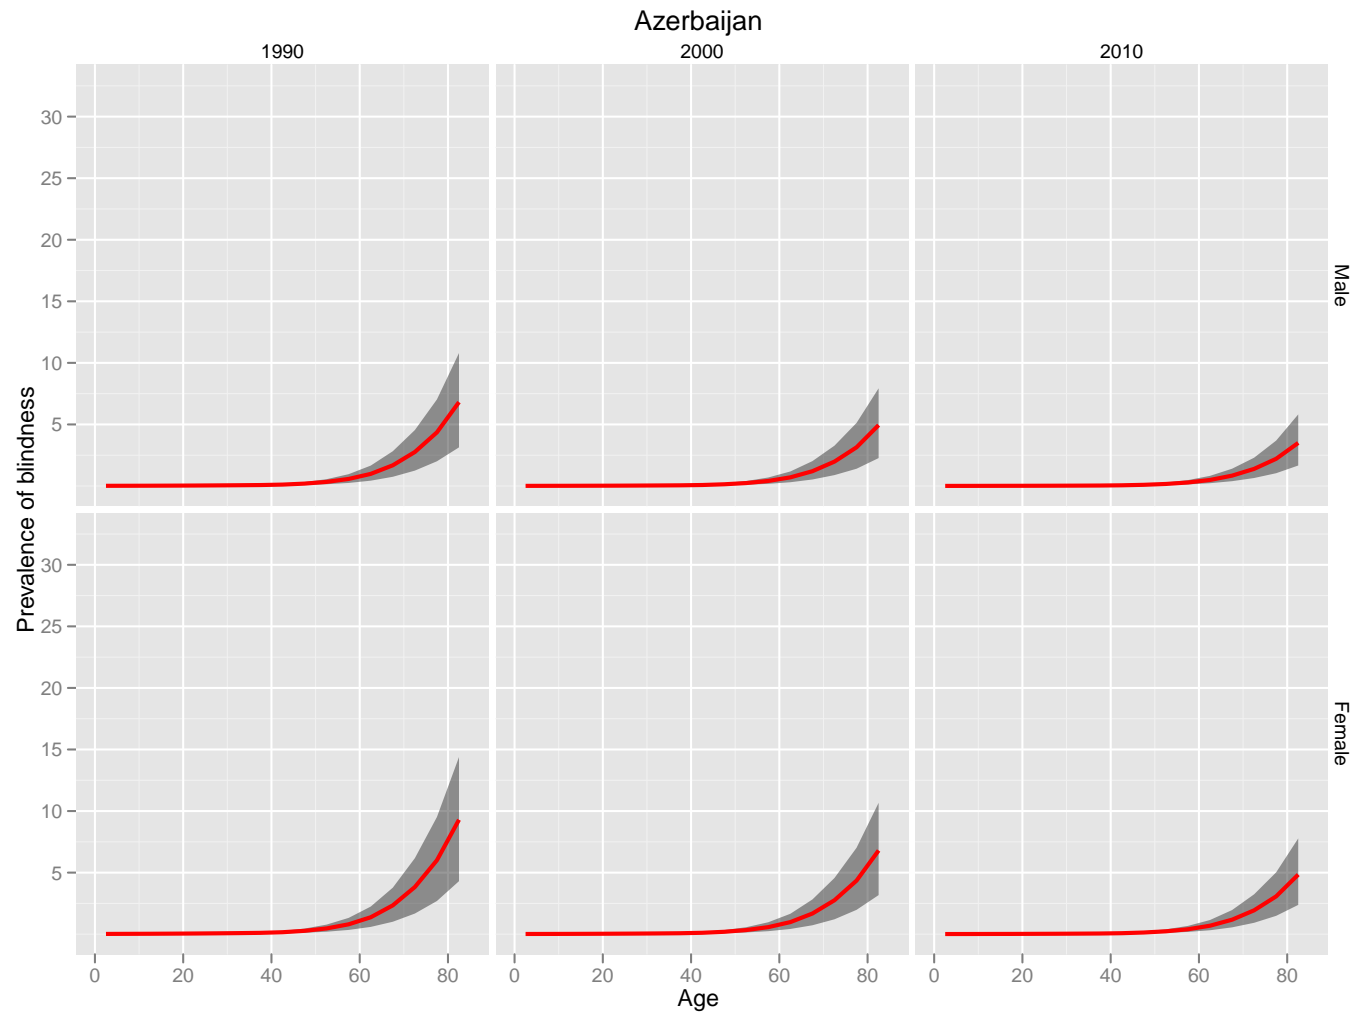

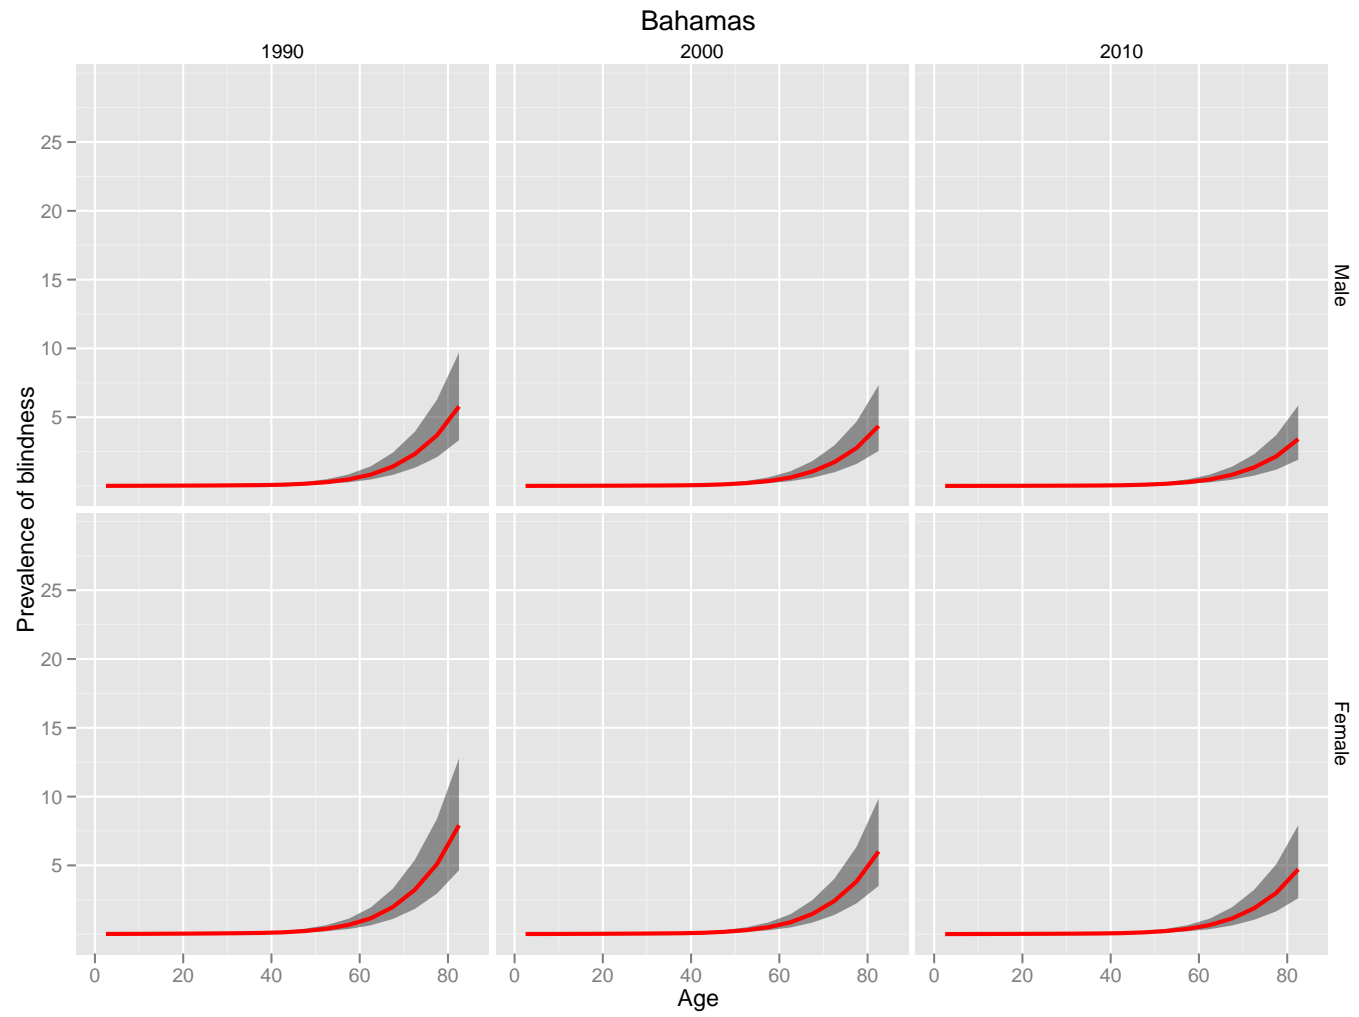

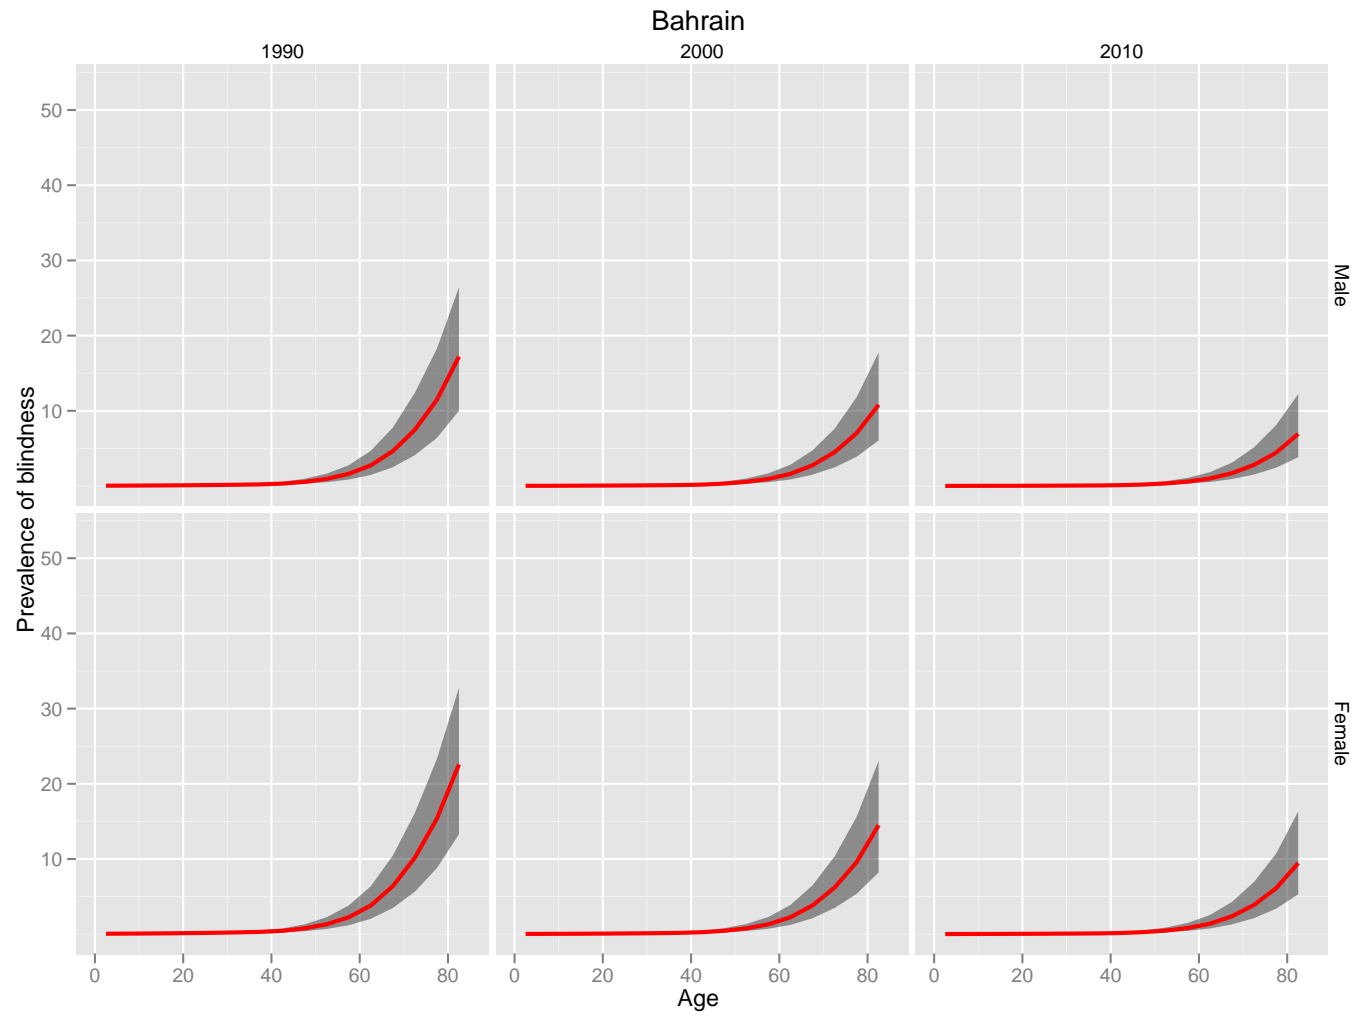



Bangladesh

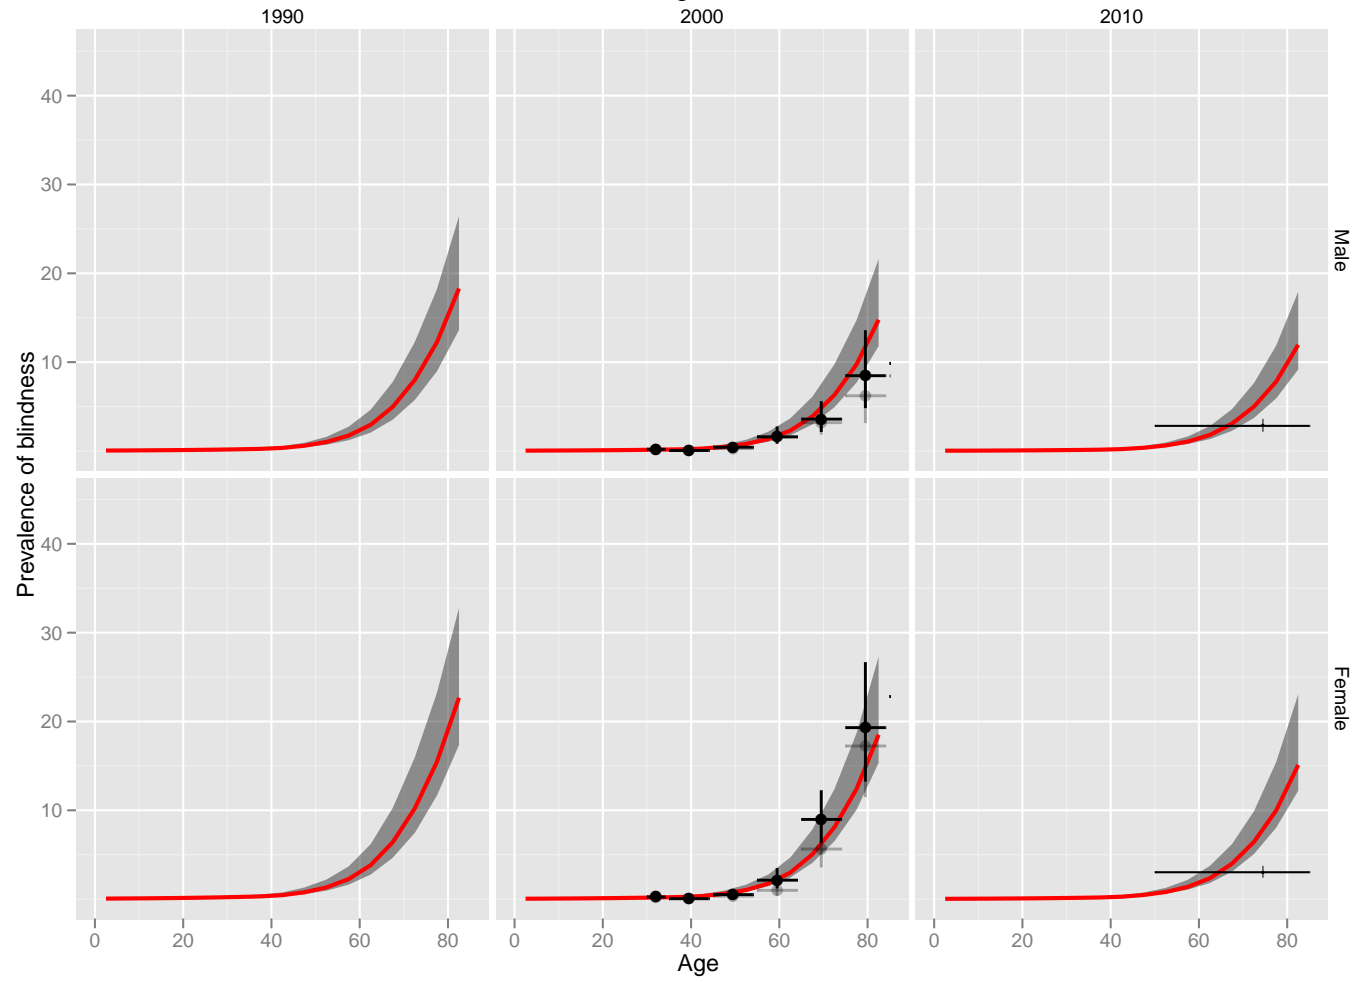

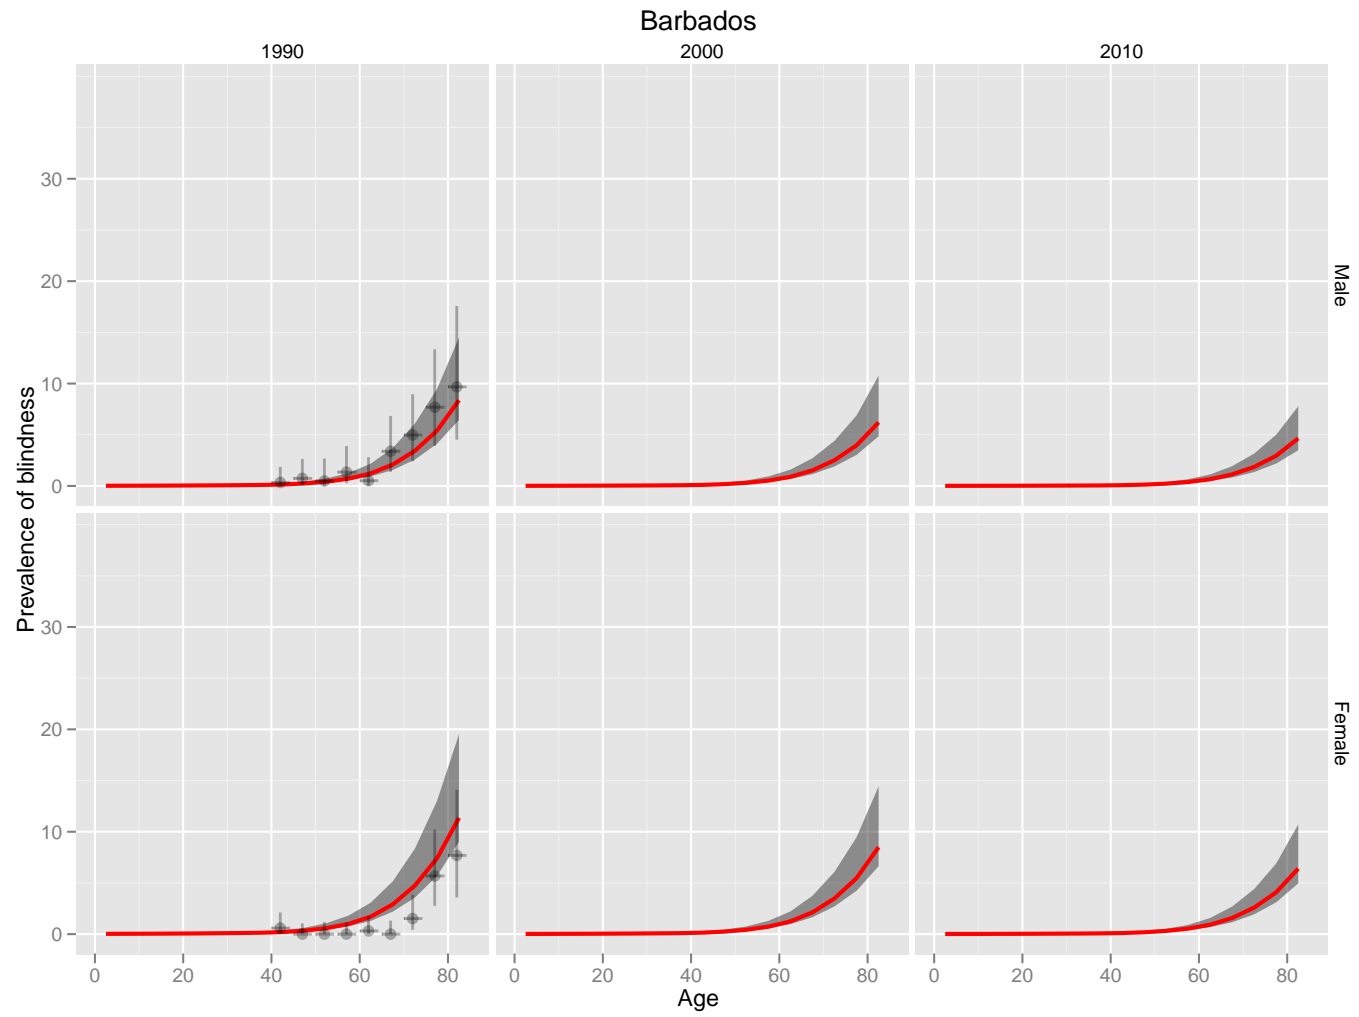

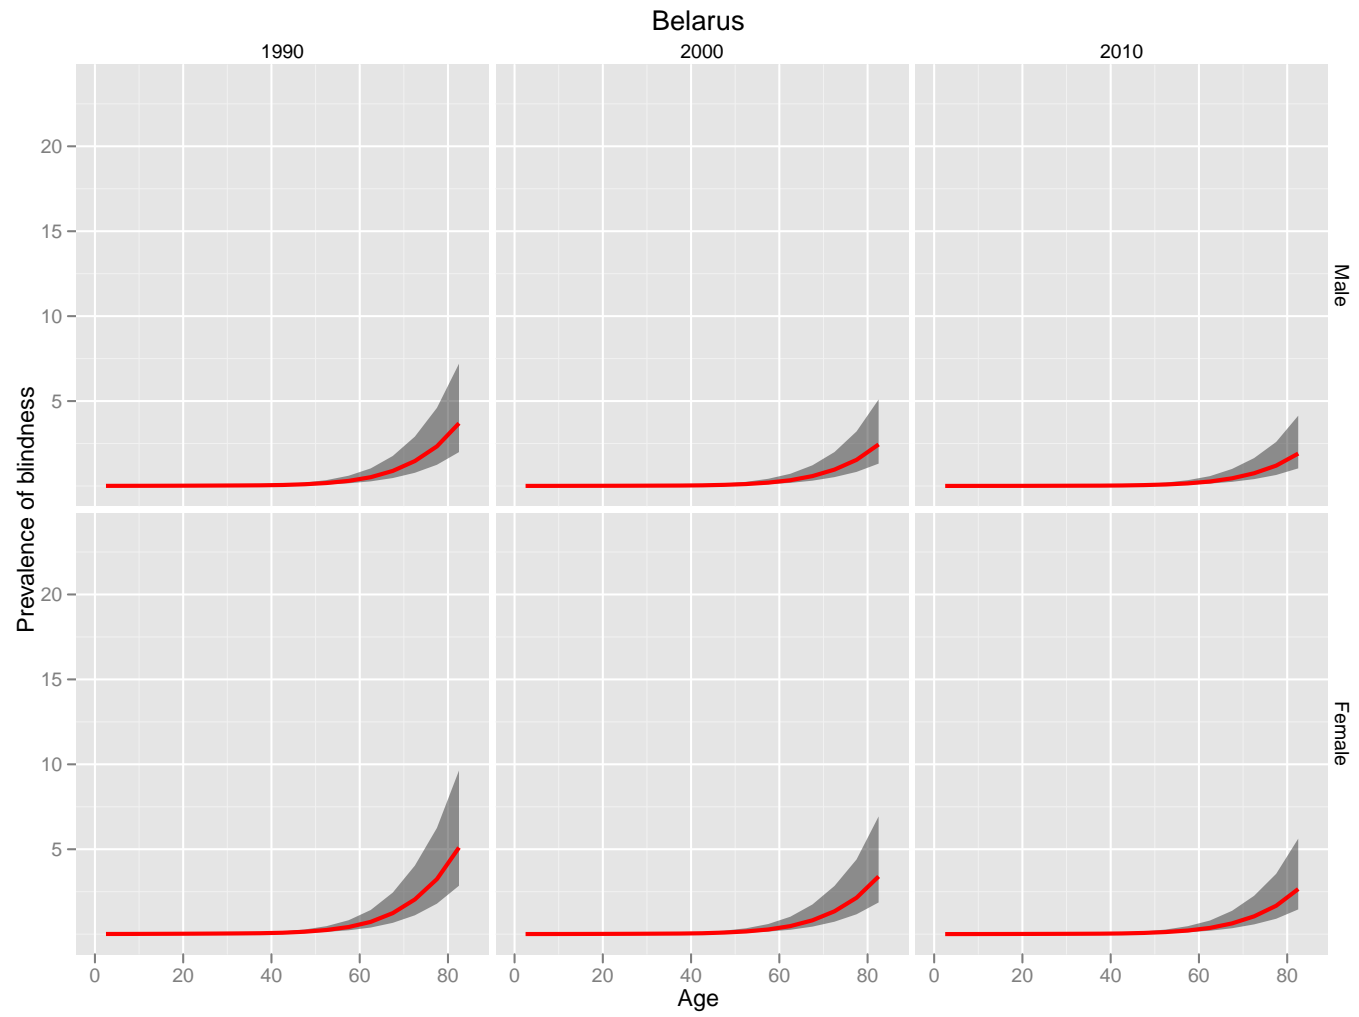

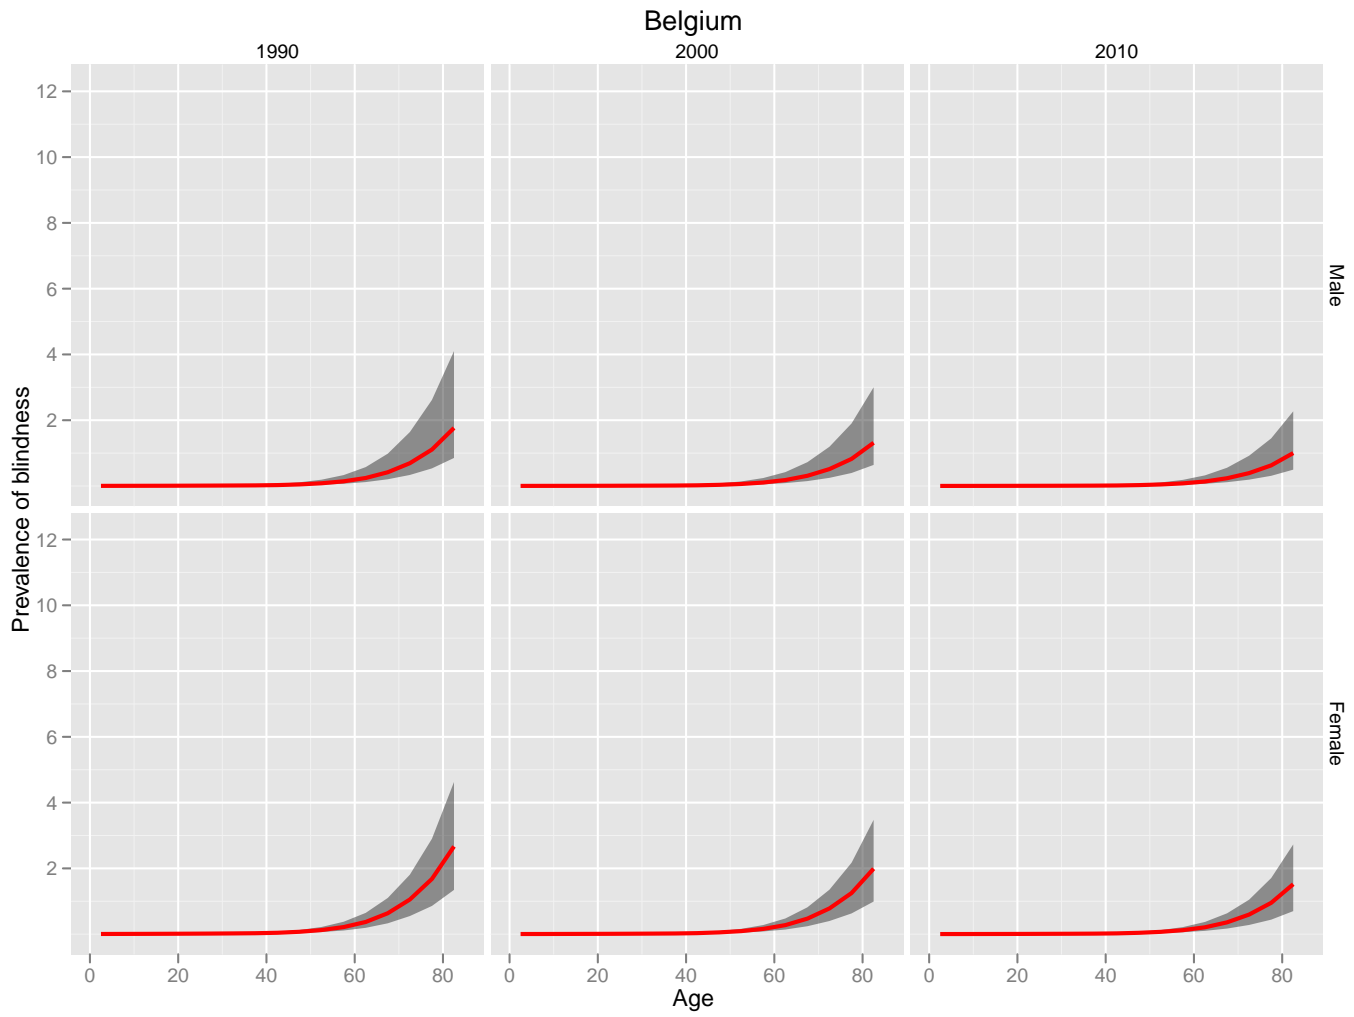

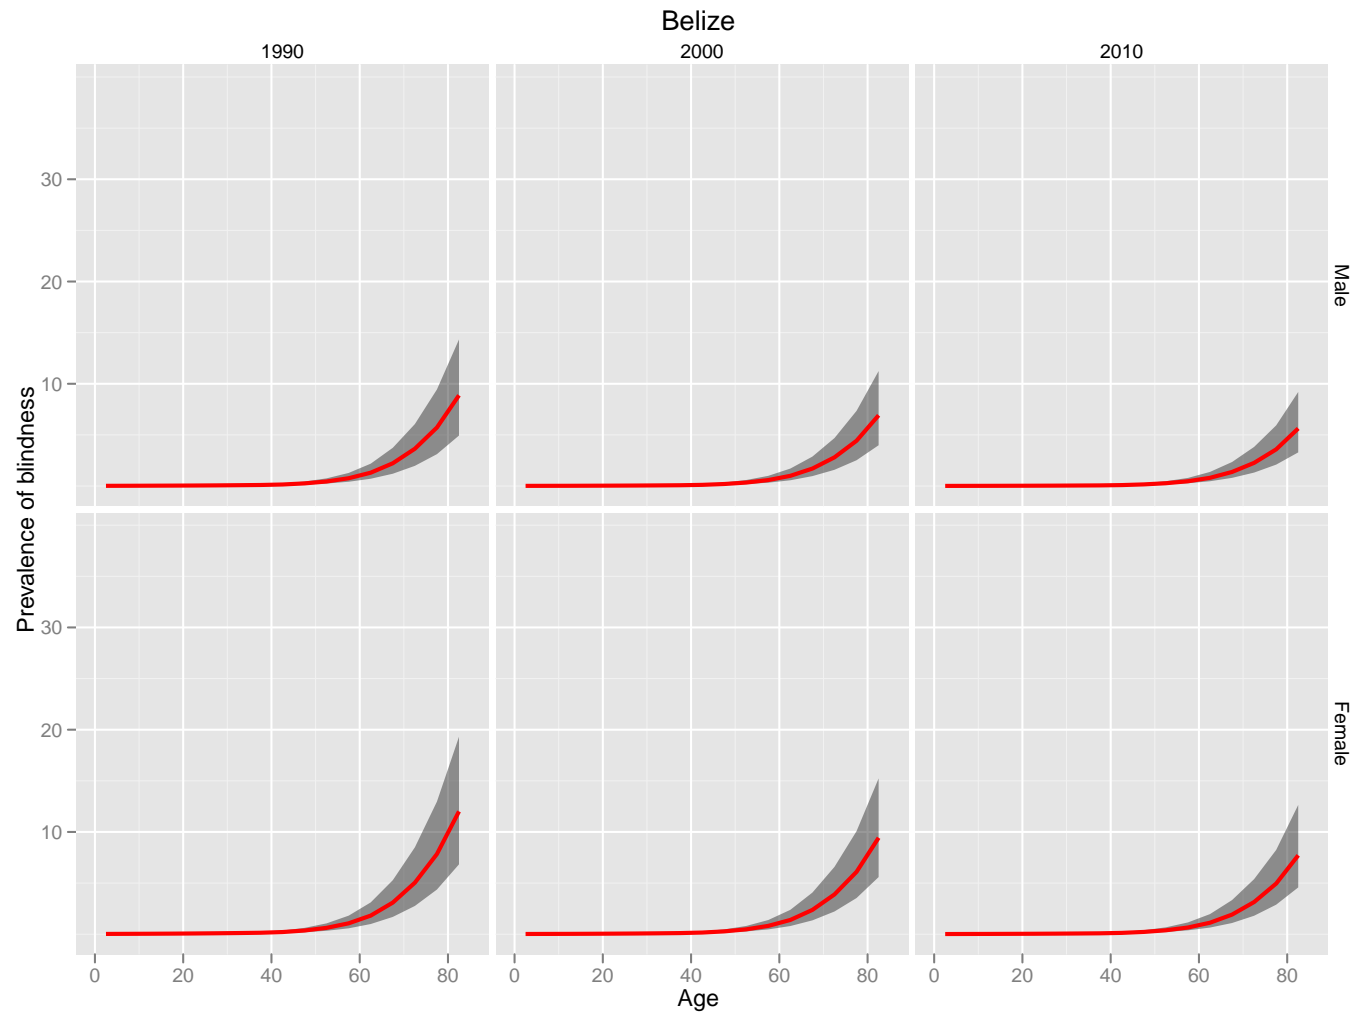

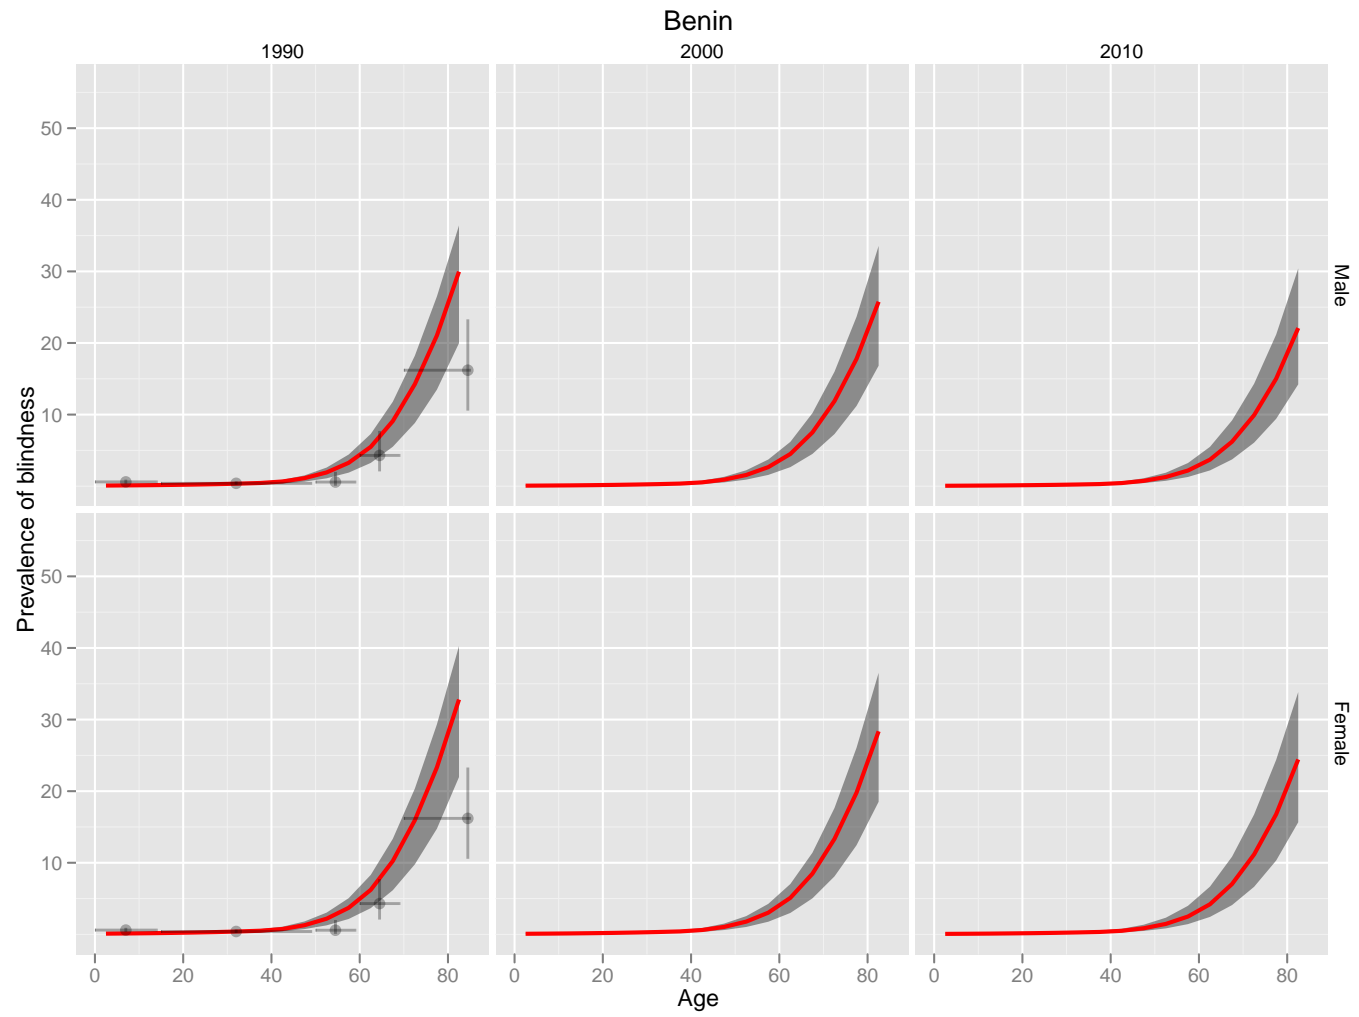

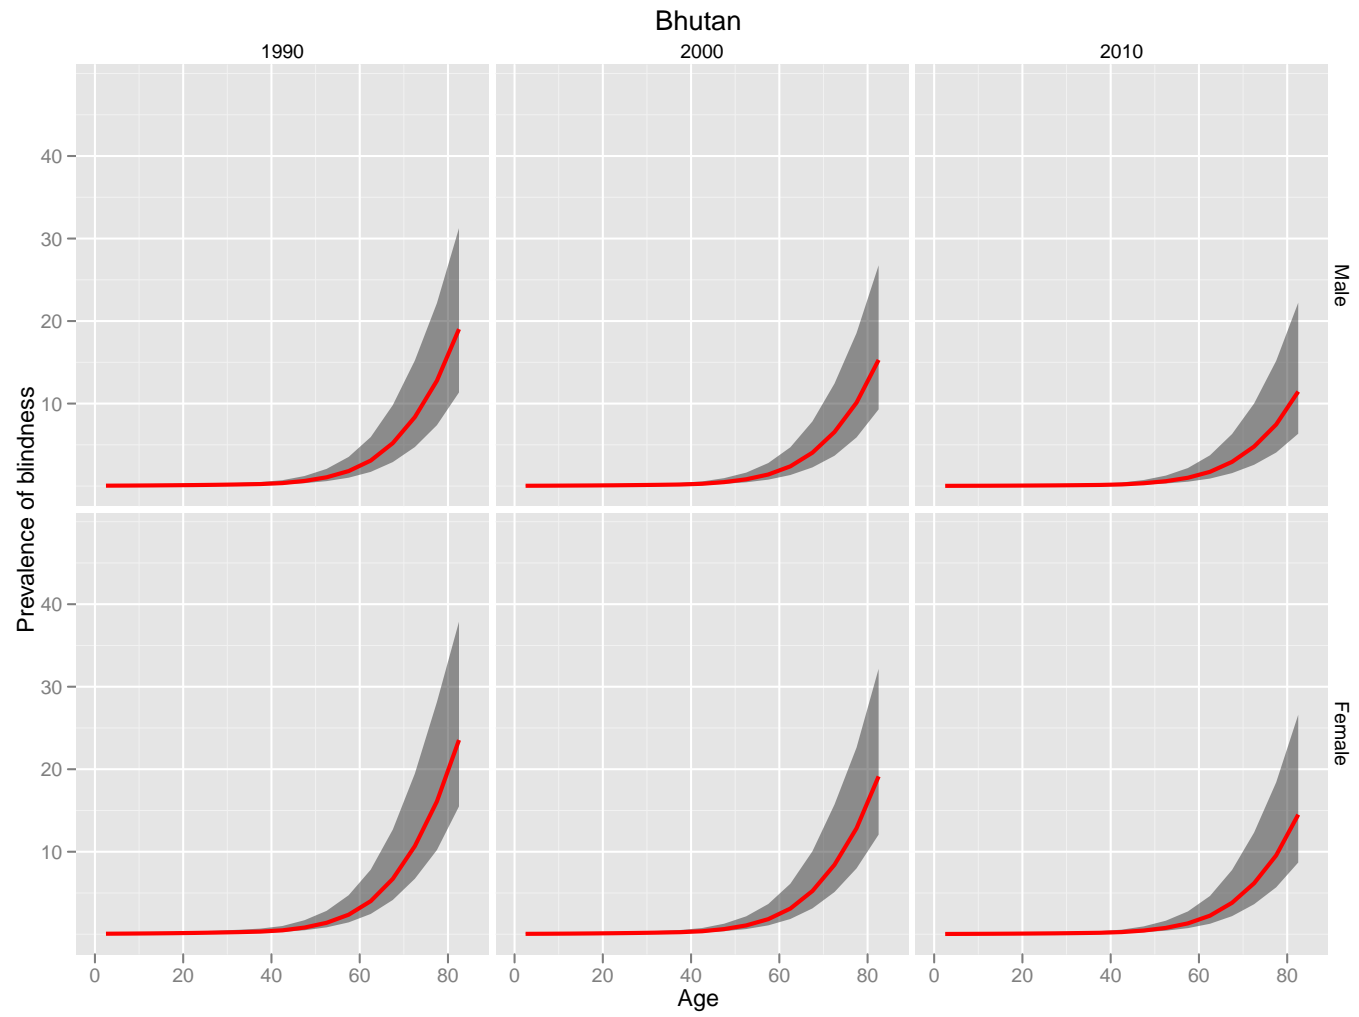

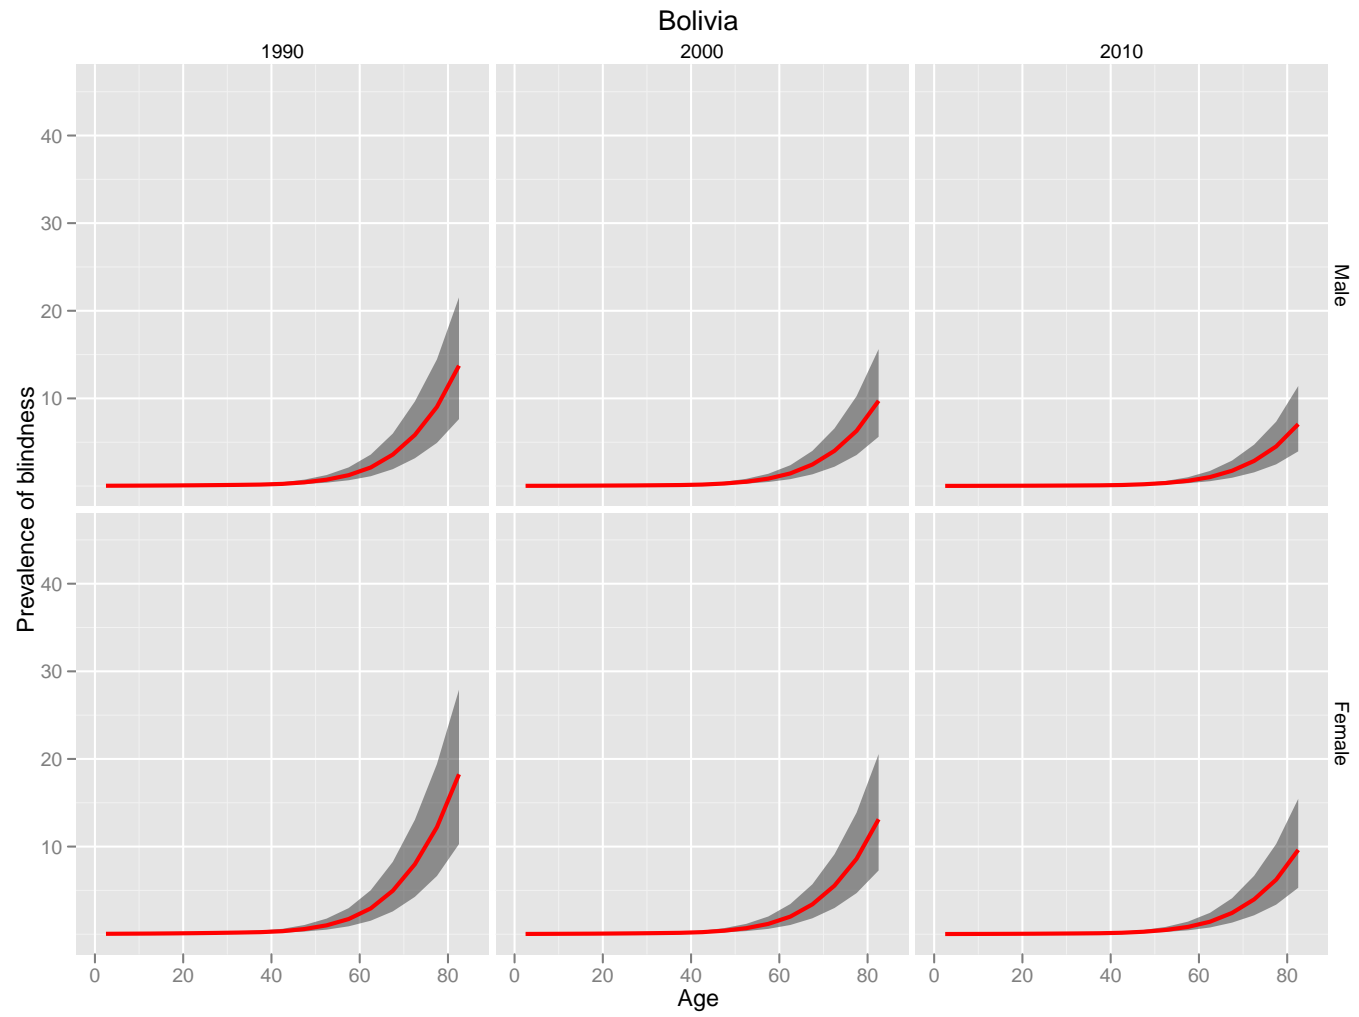



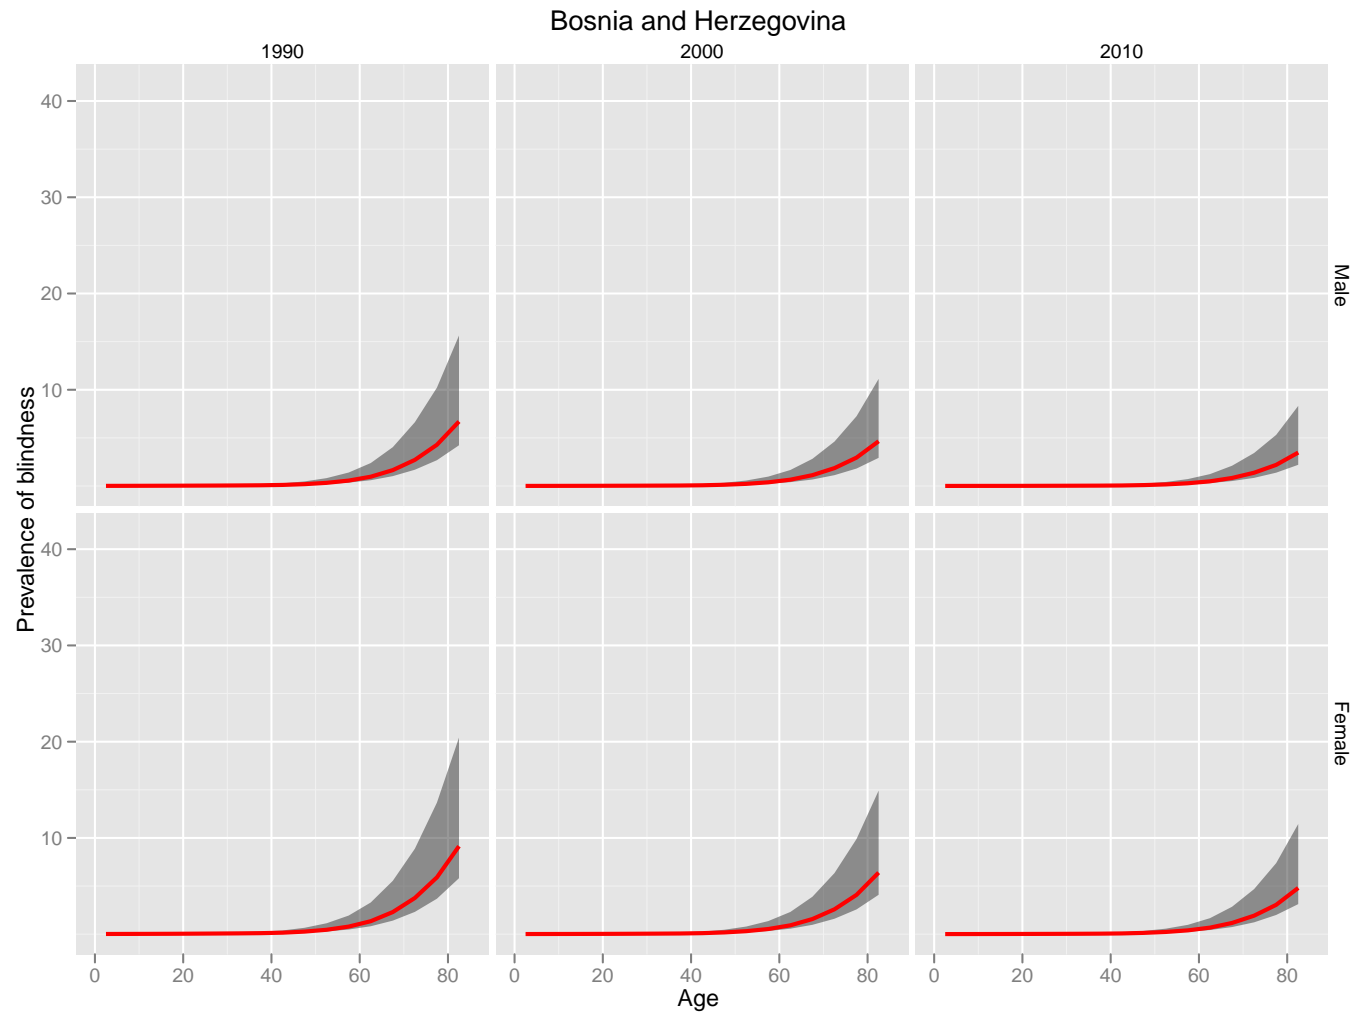

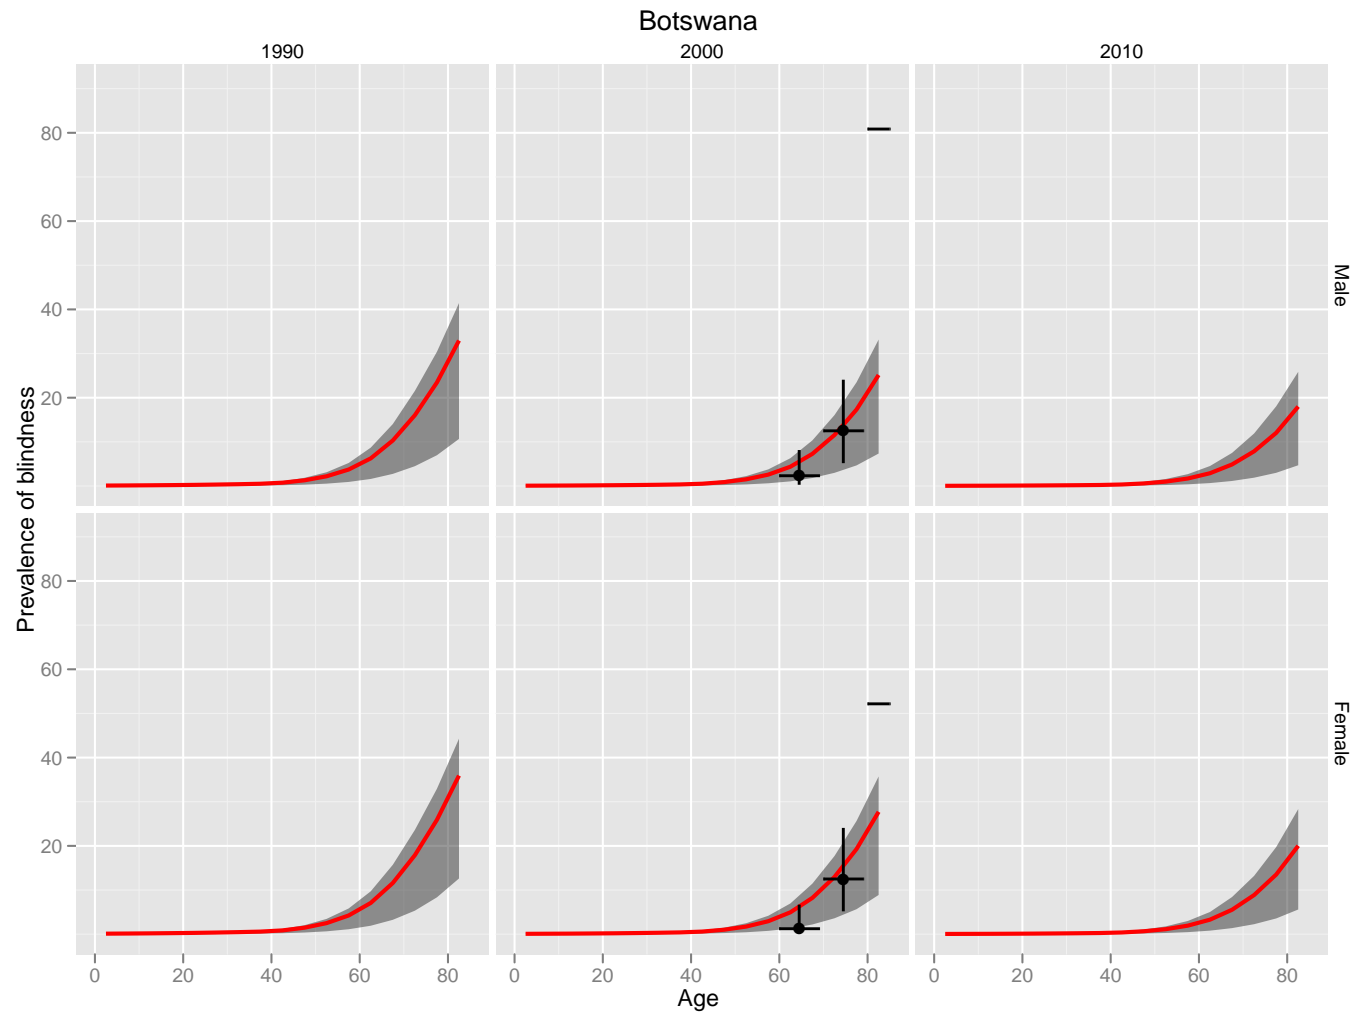

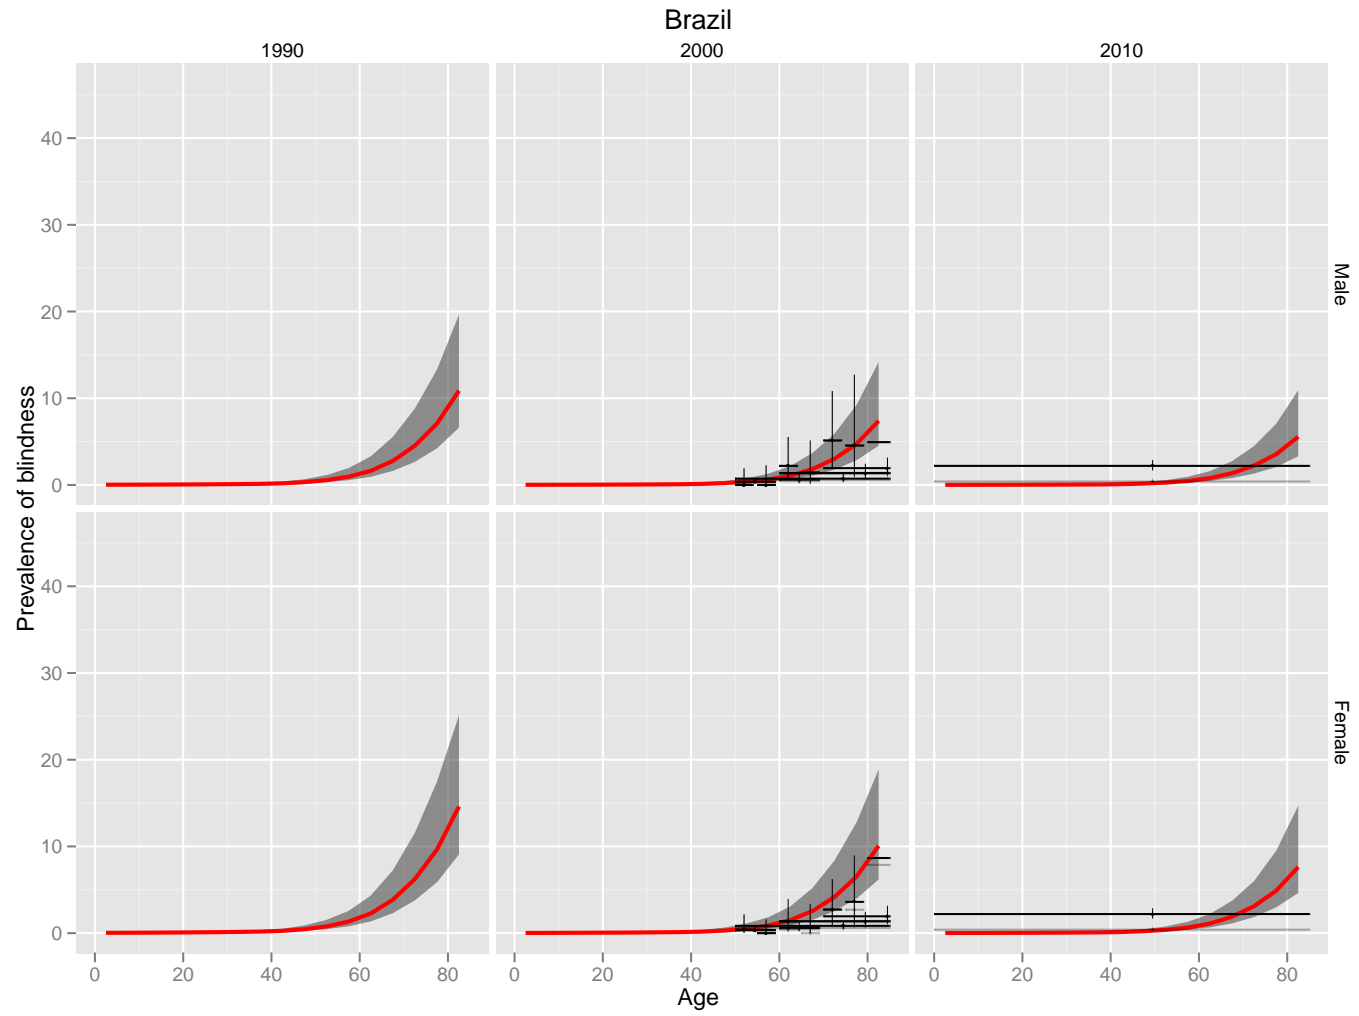

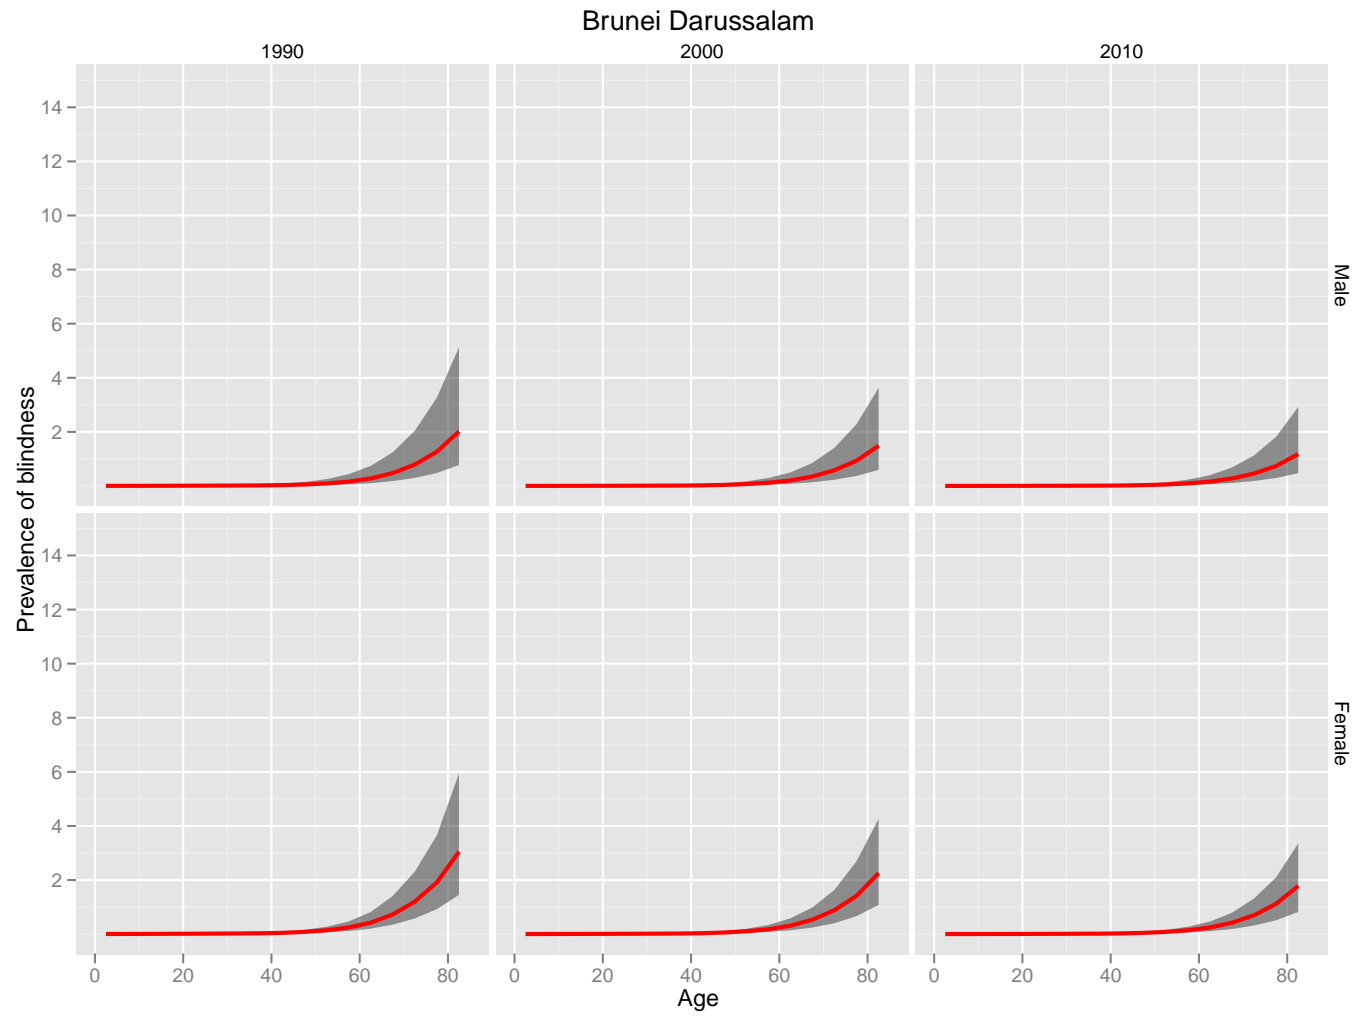

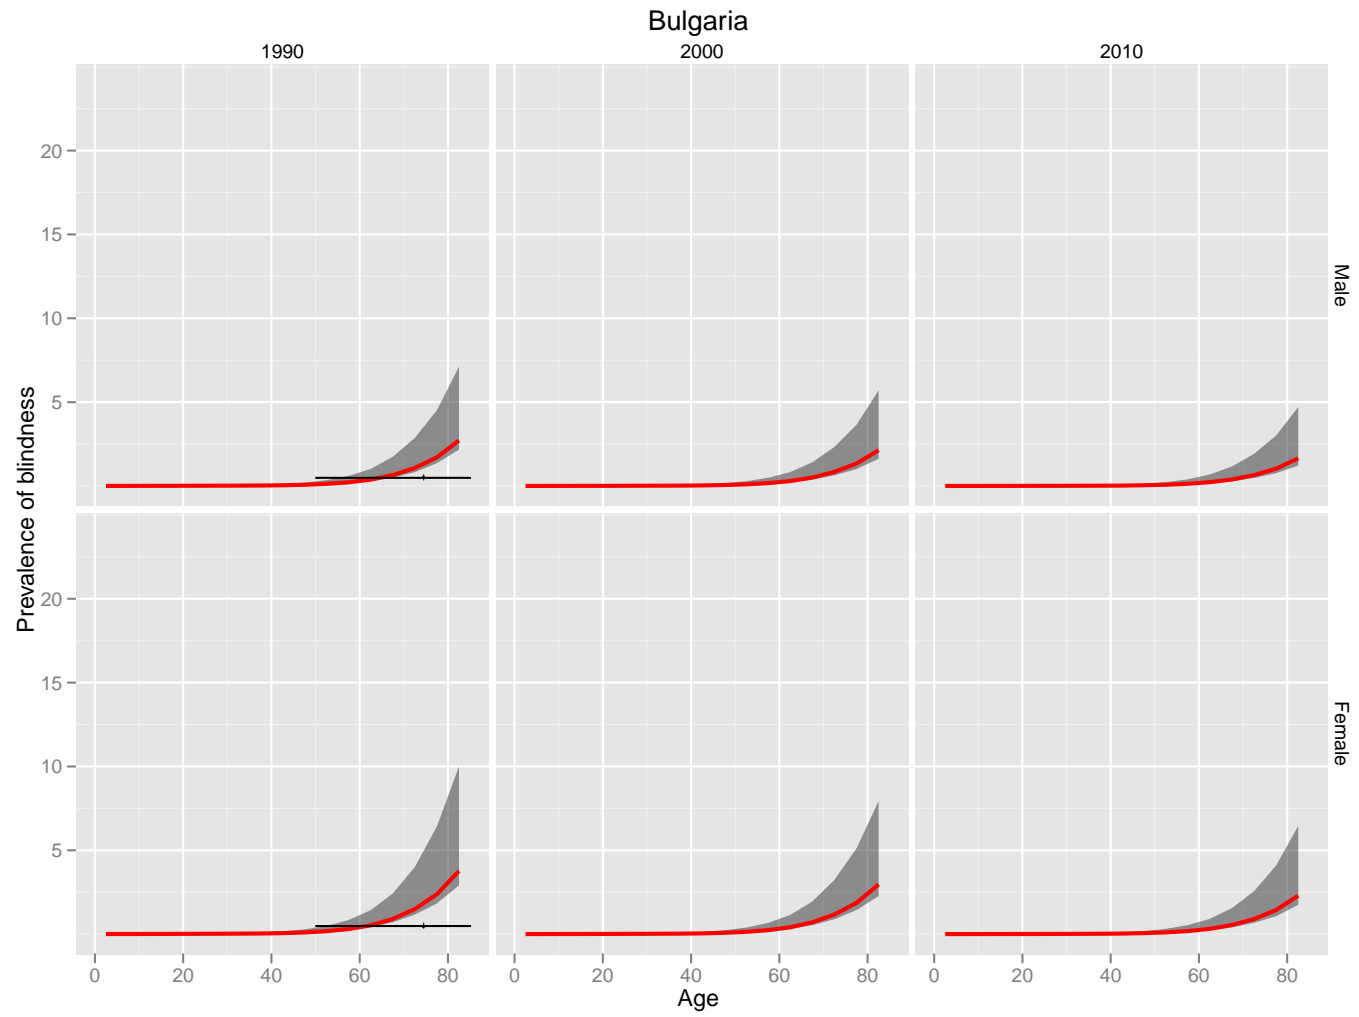

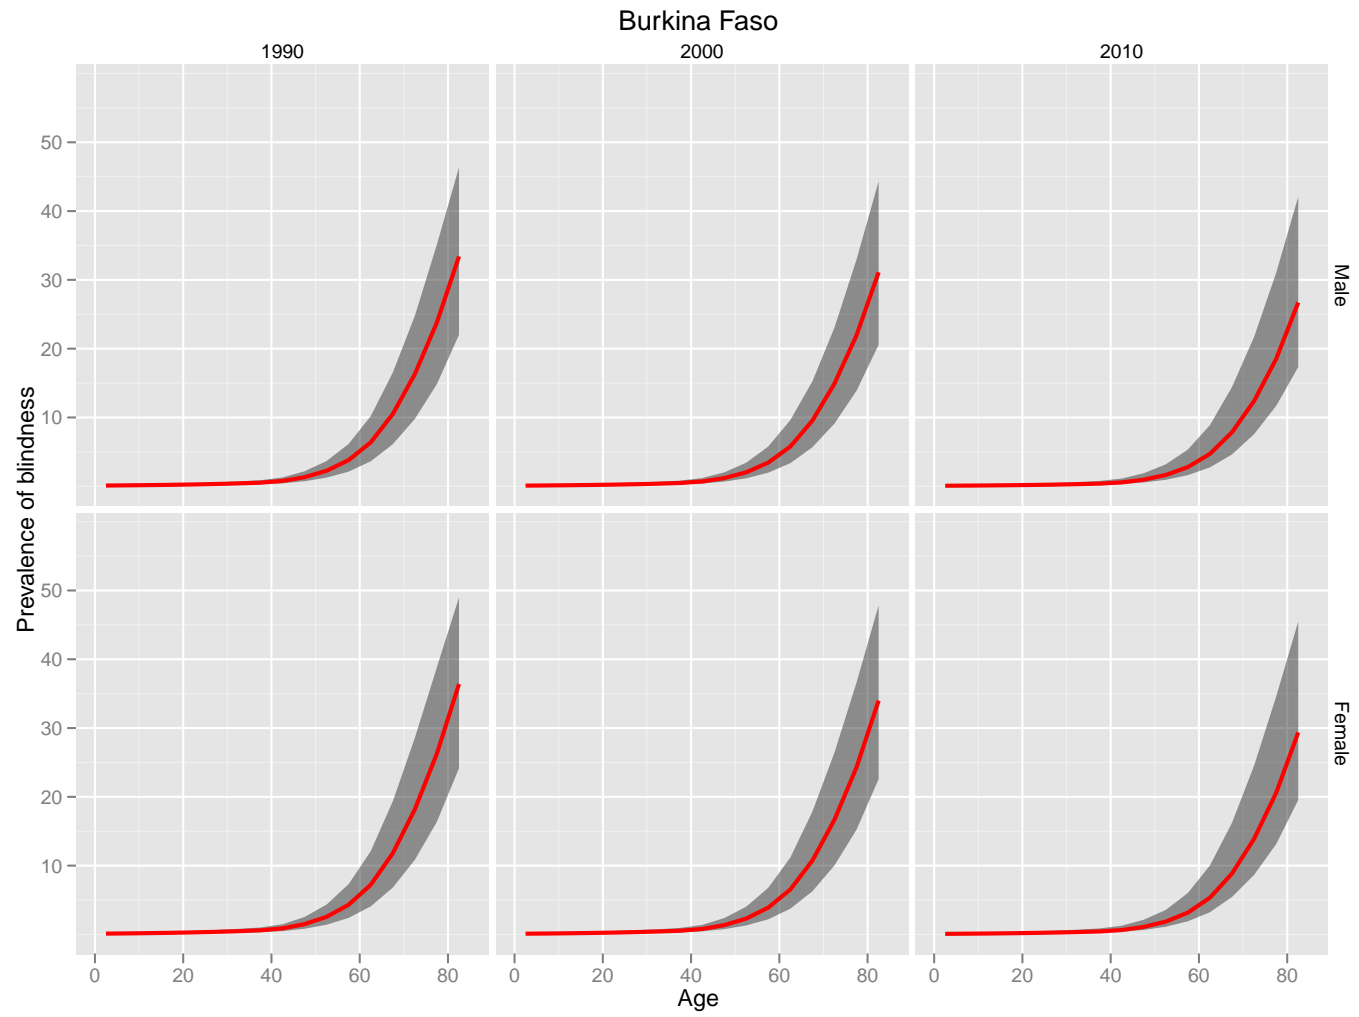

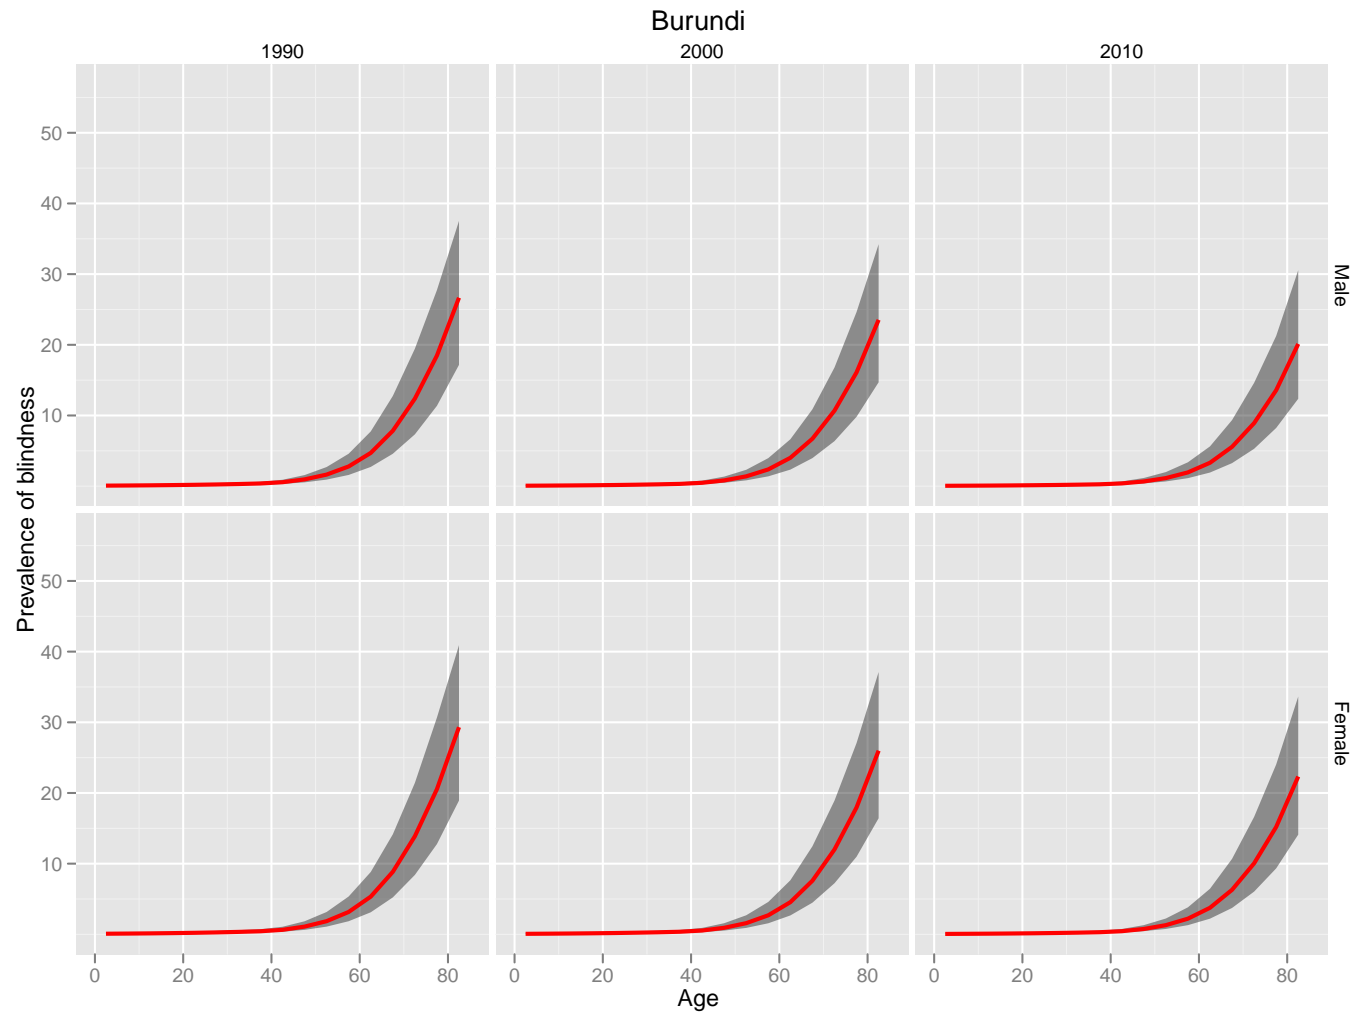

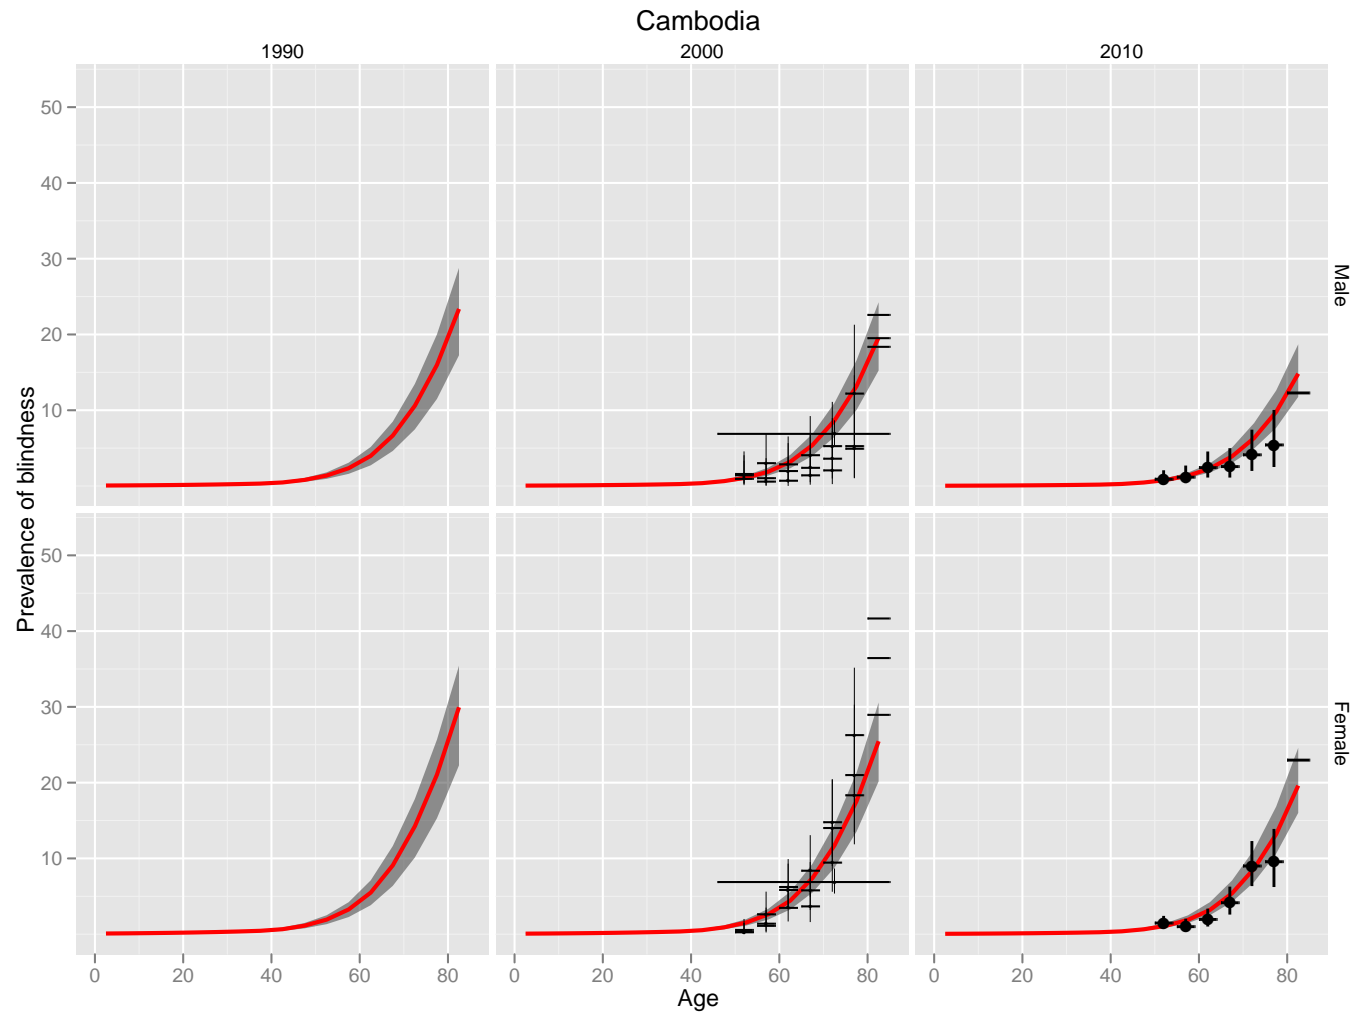



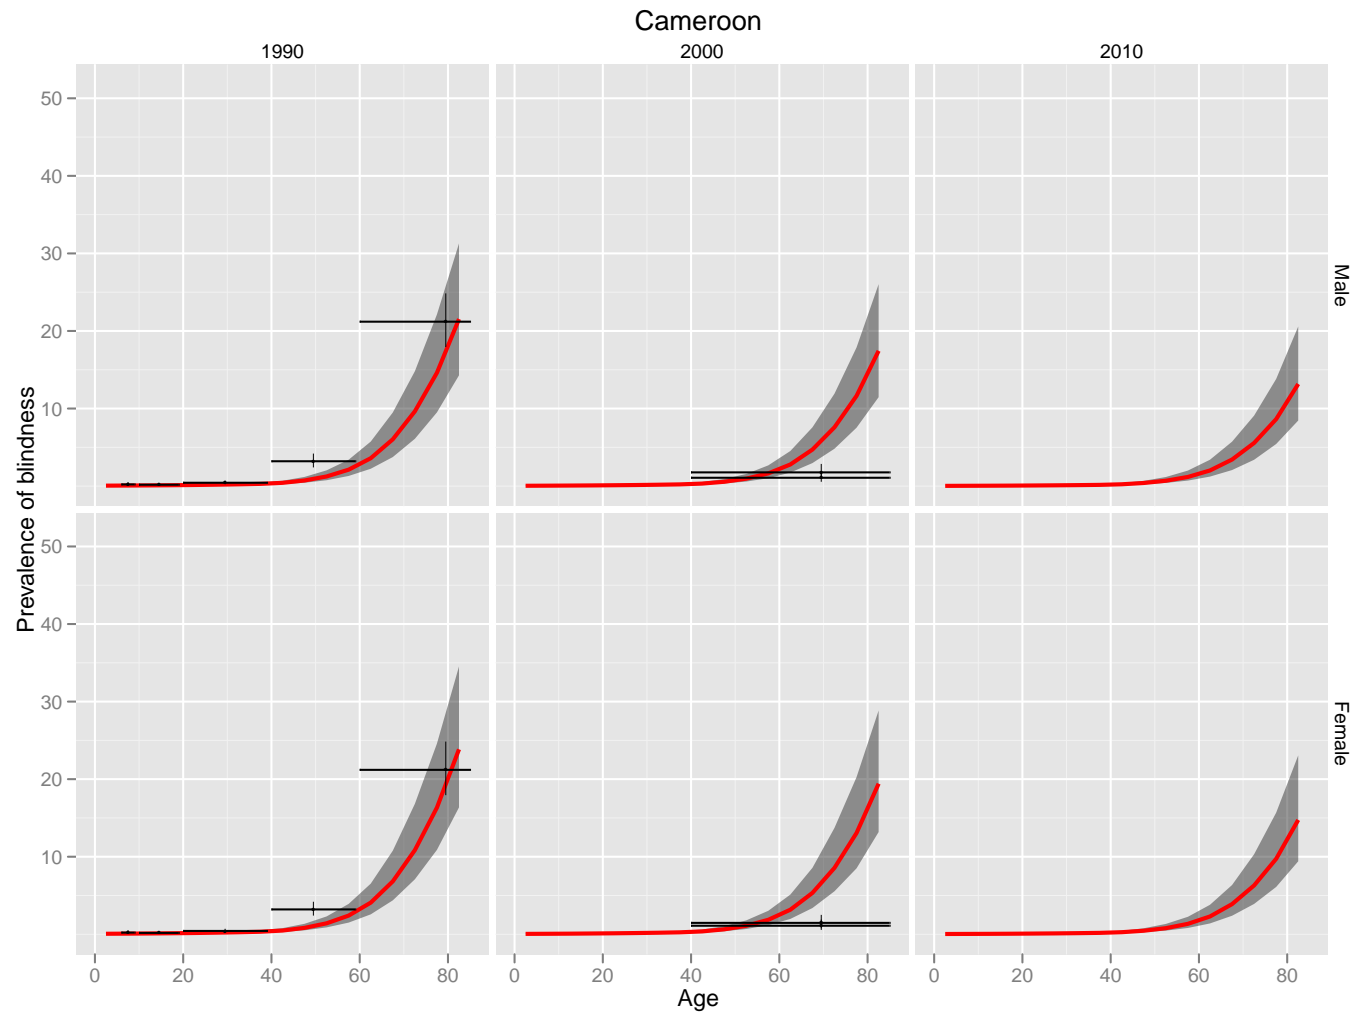

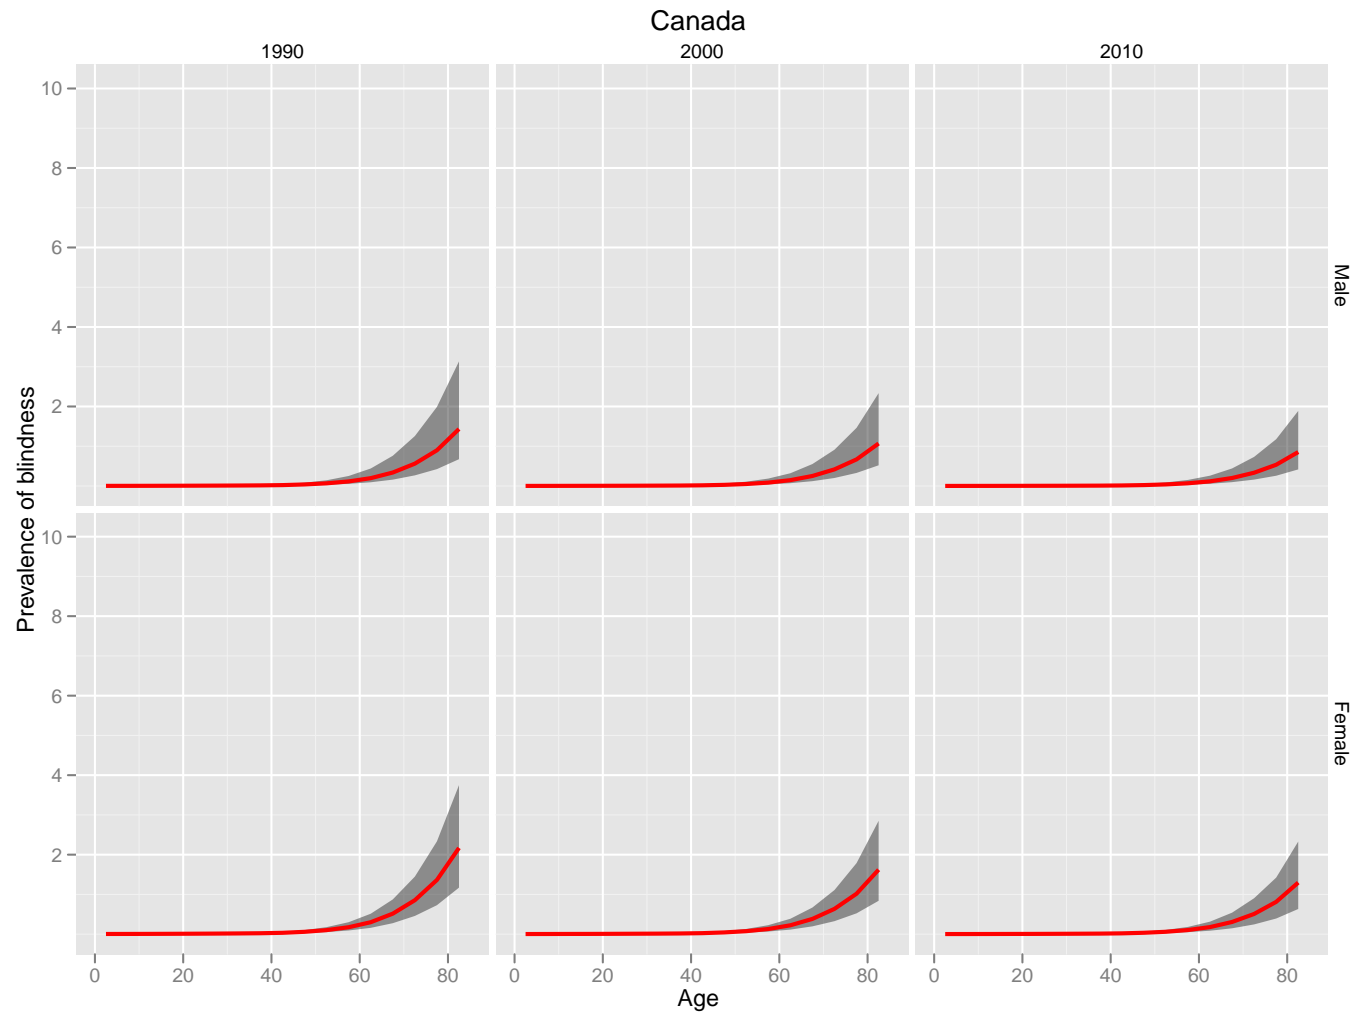

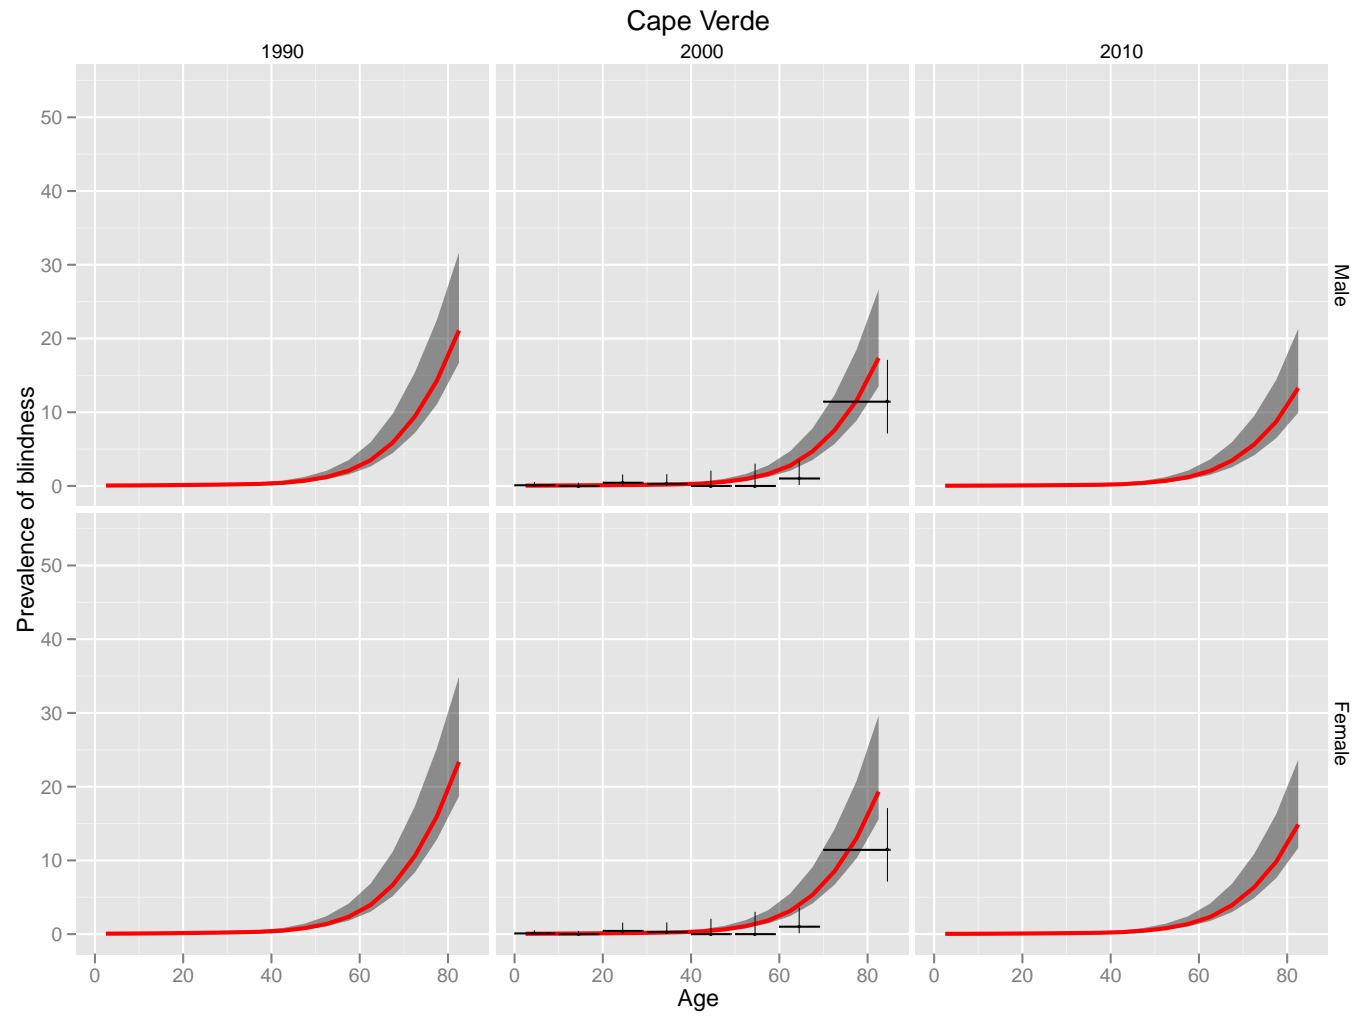

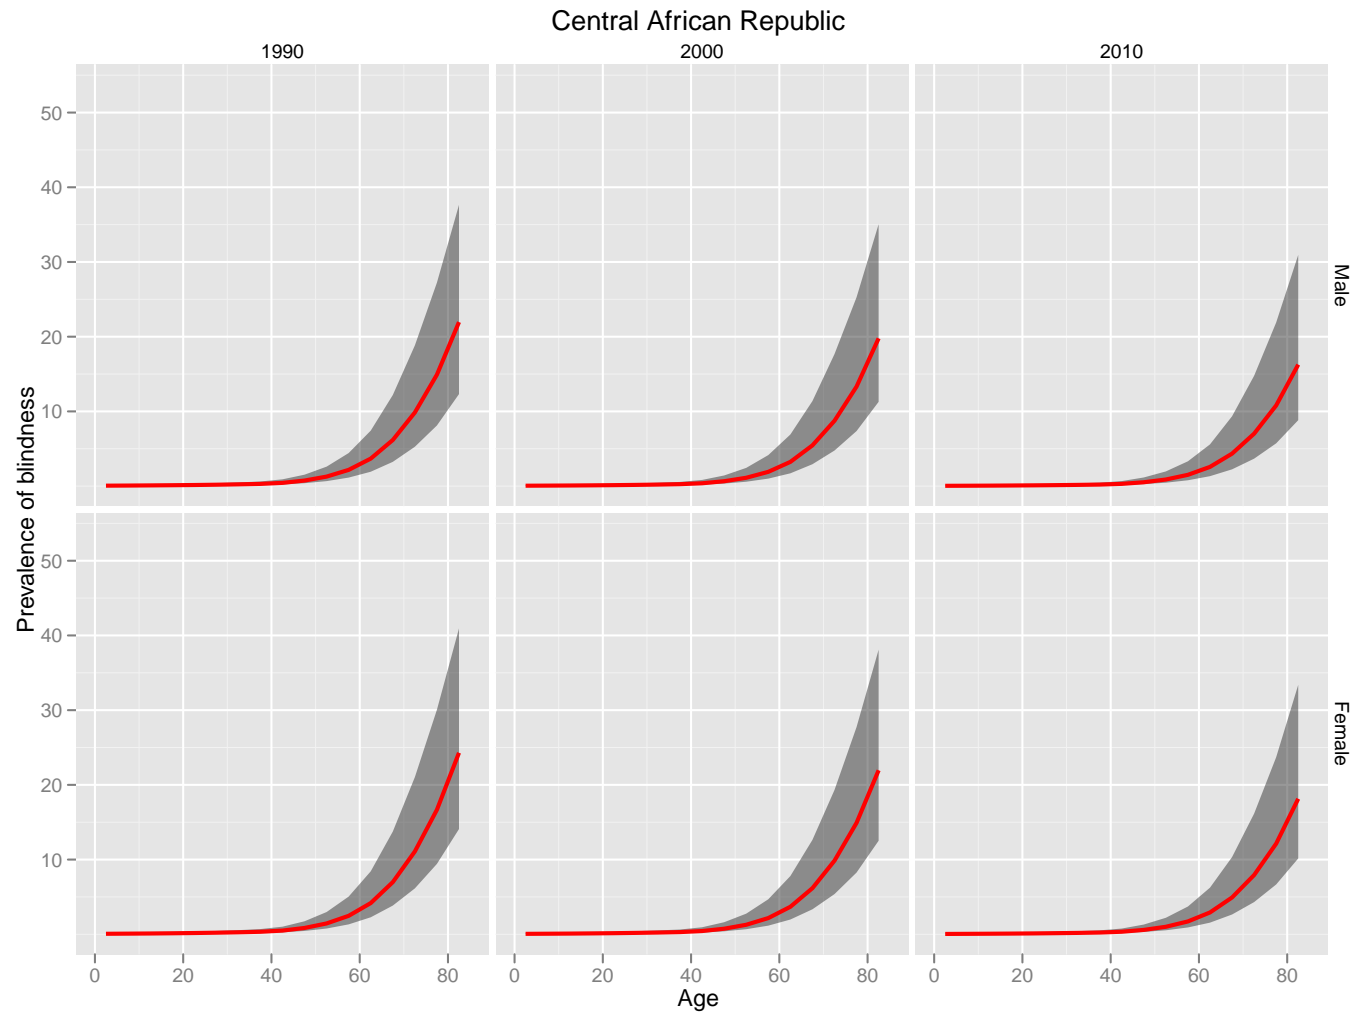

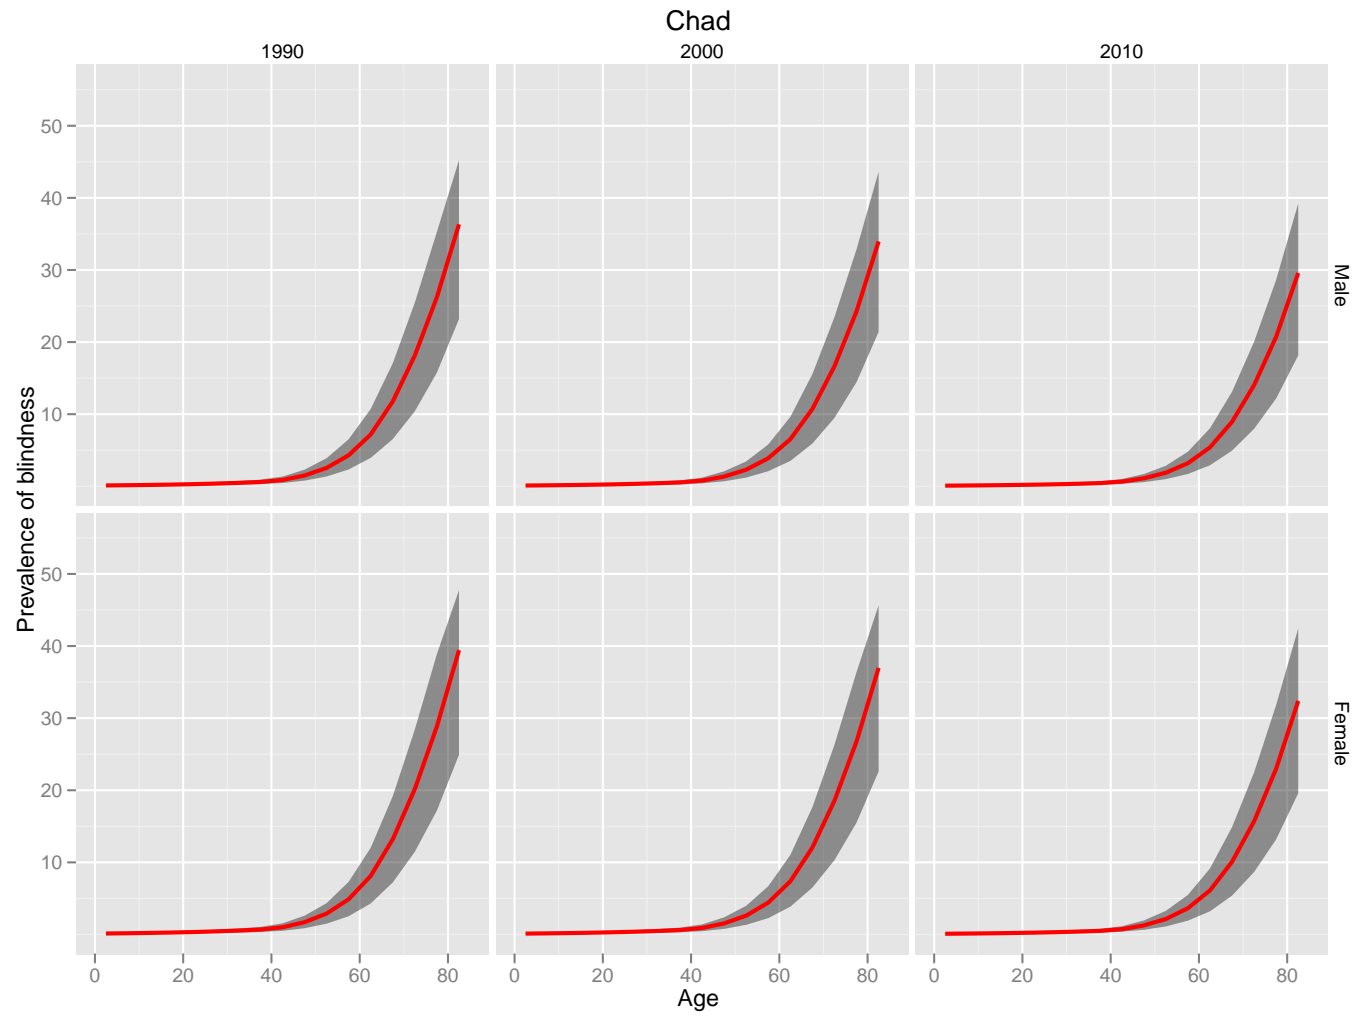

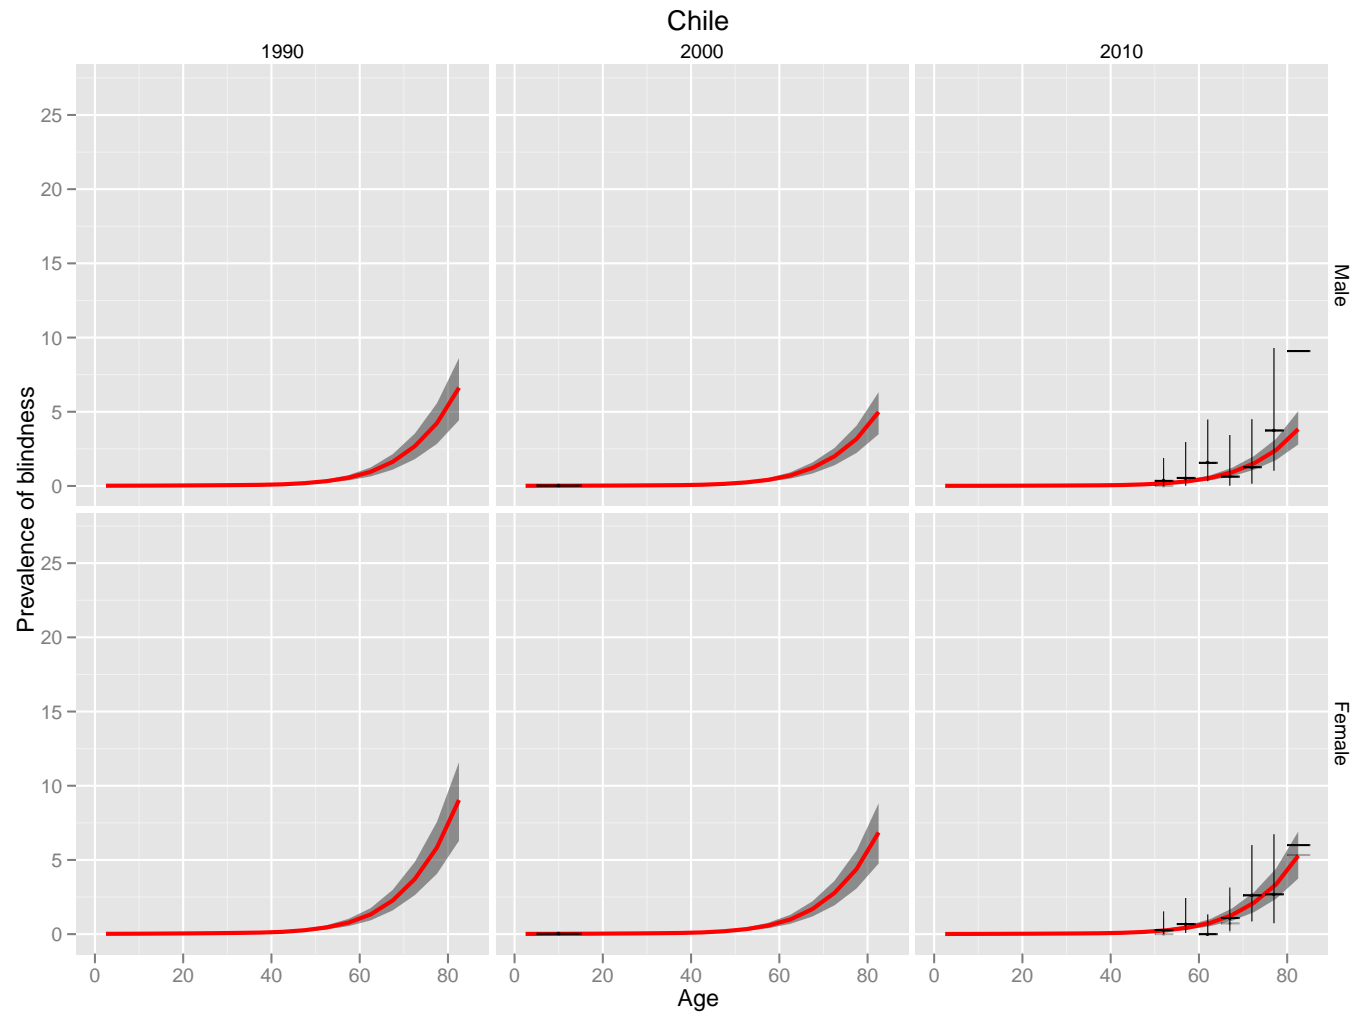

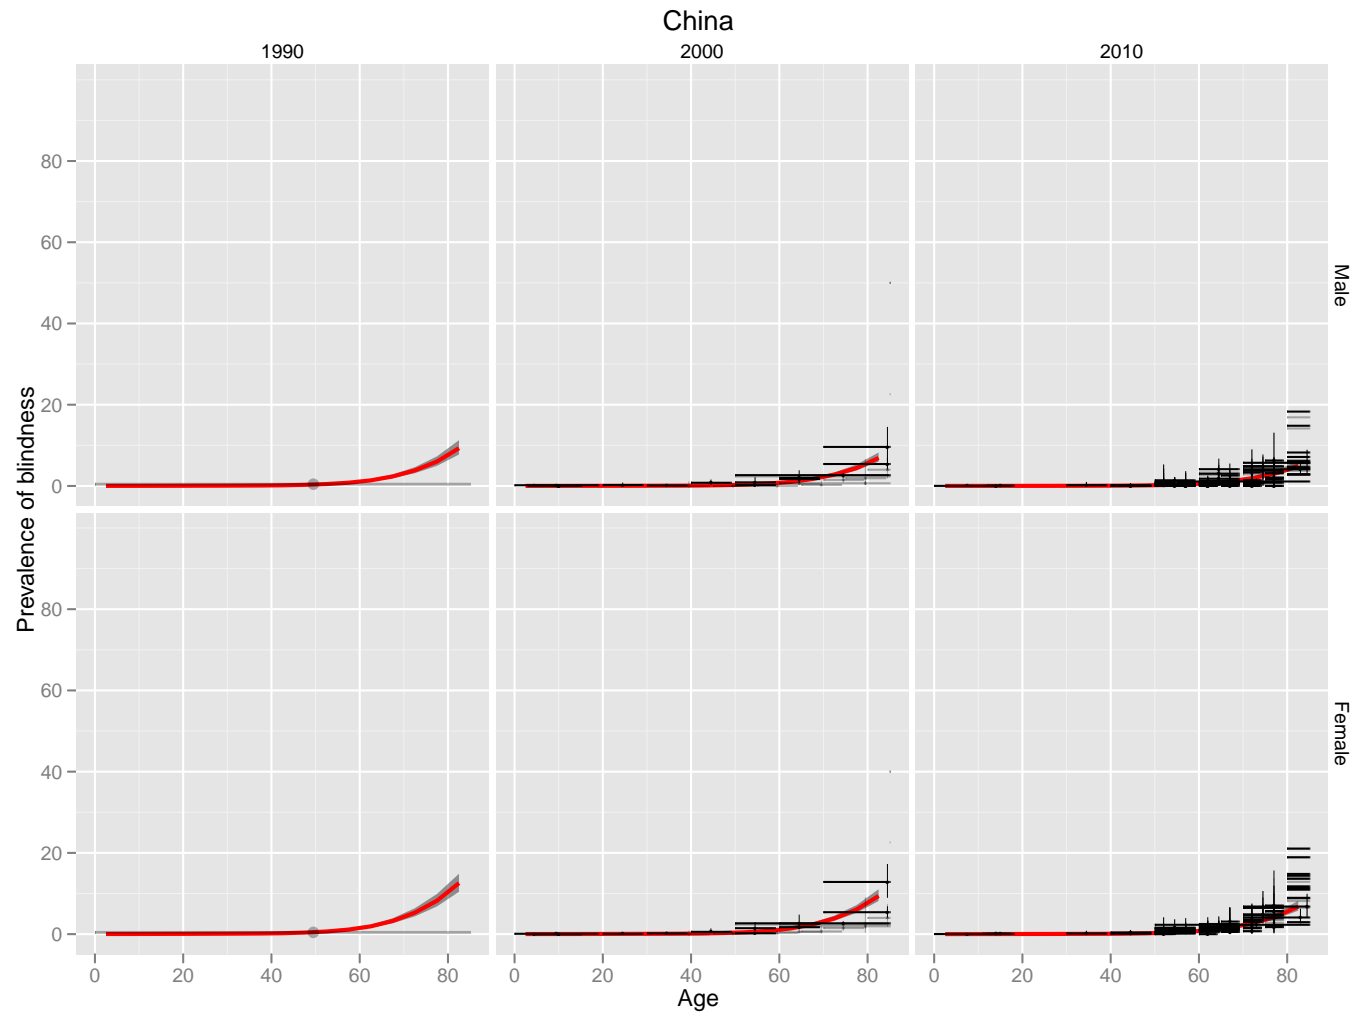

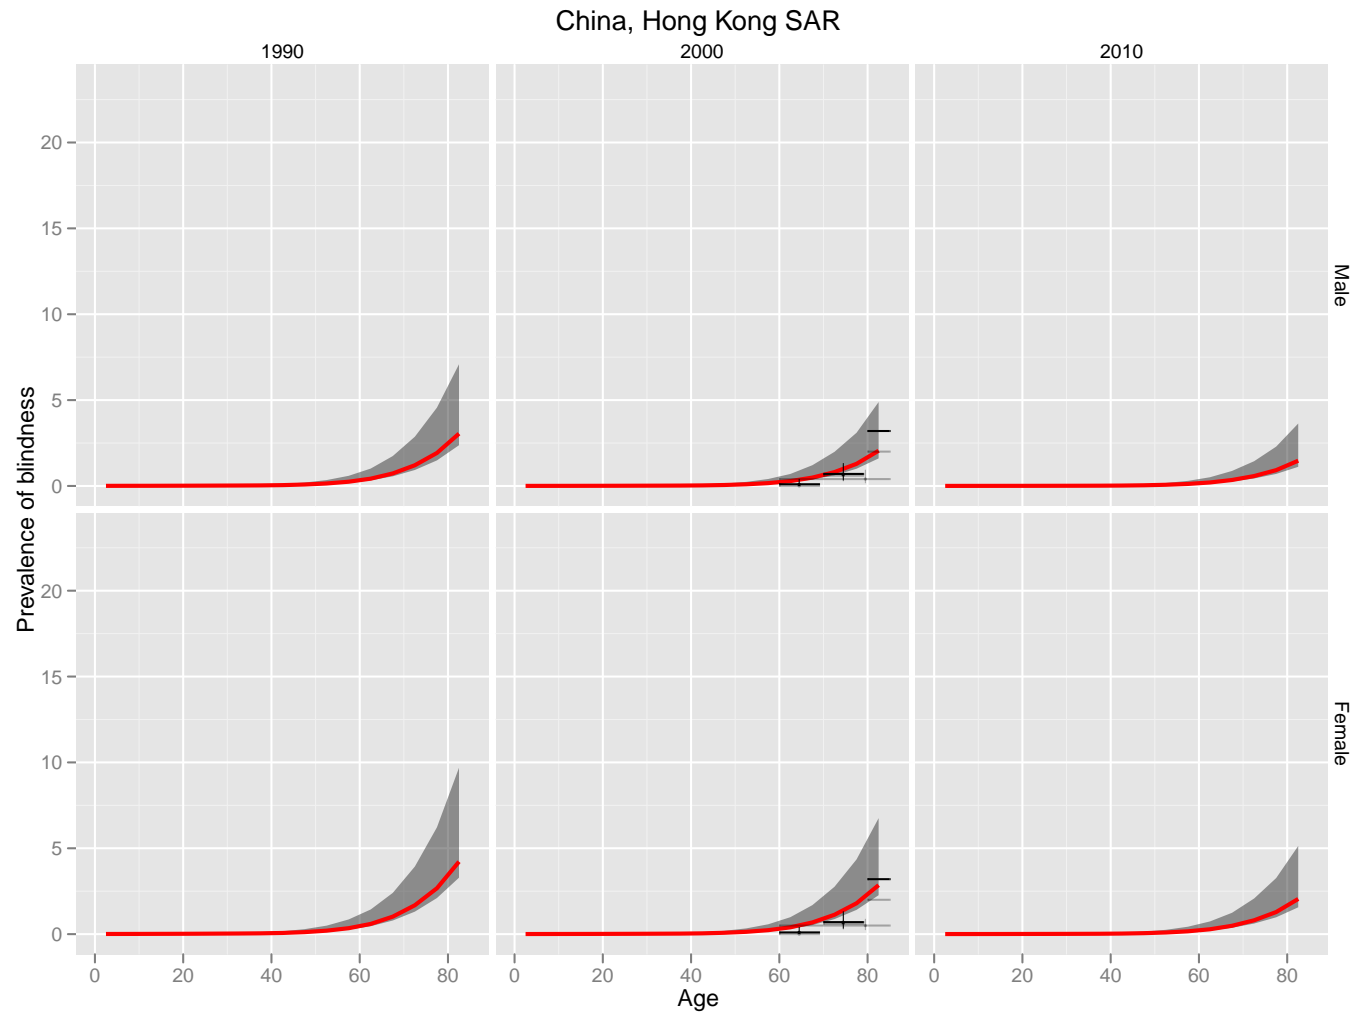



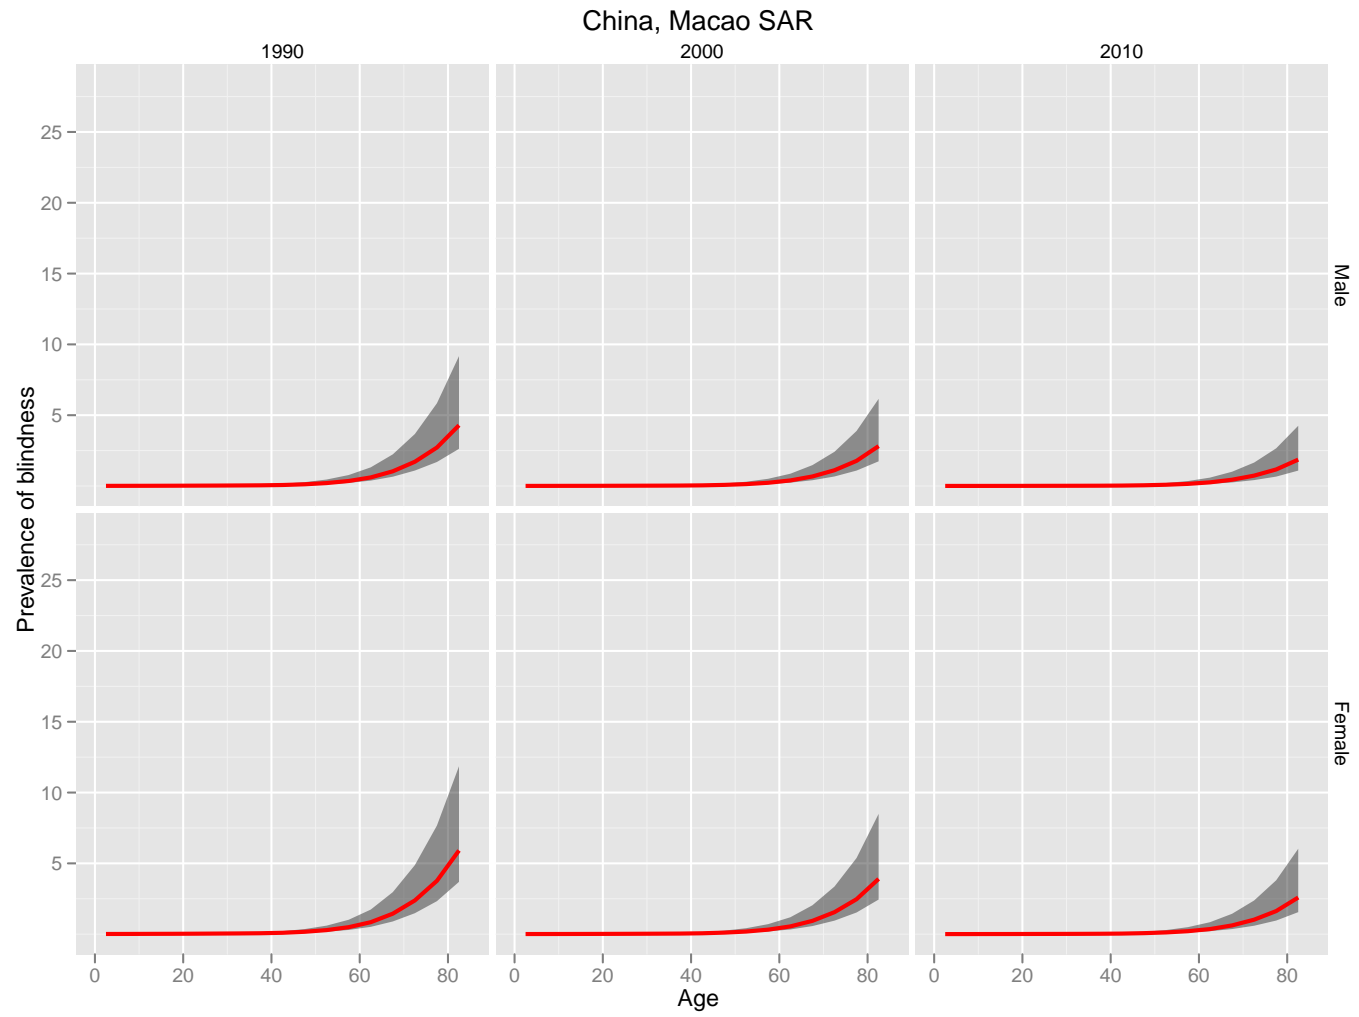

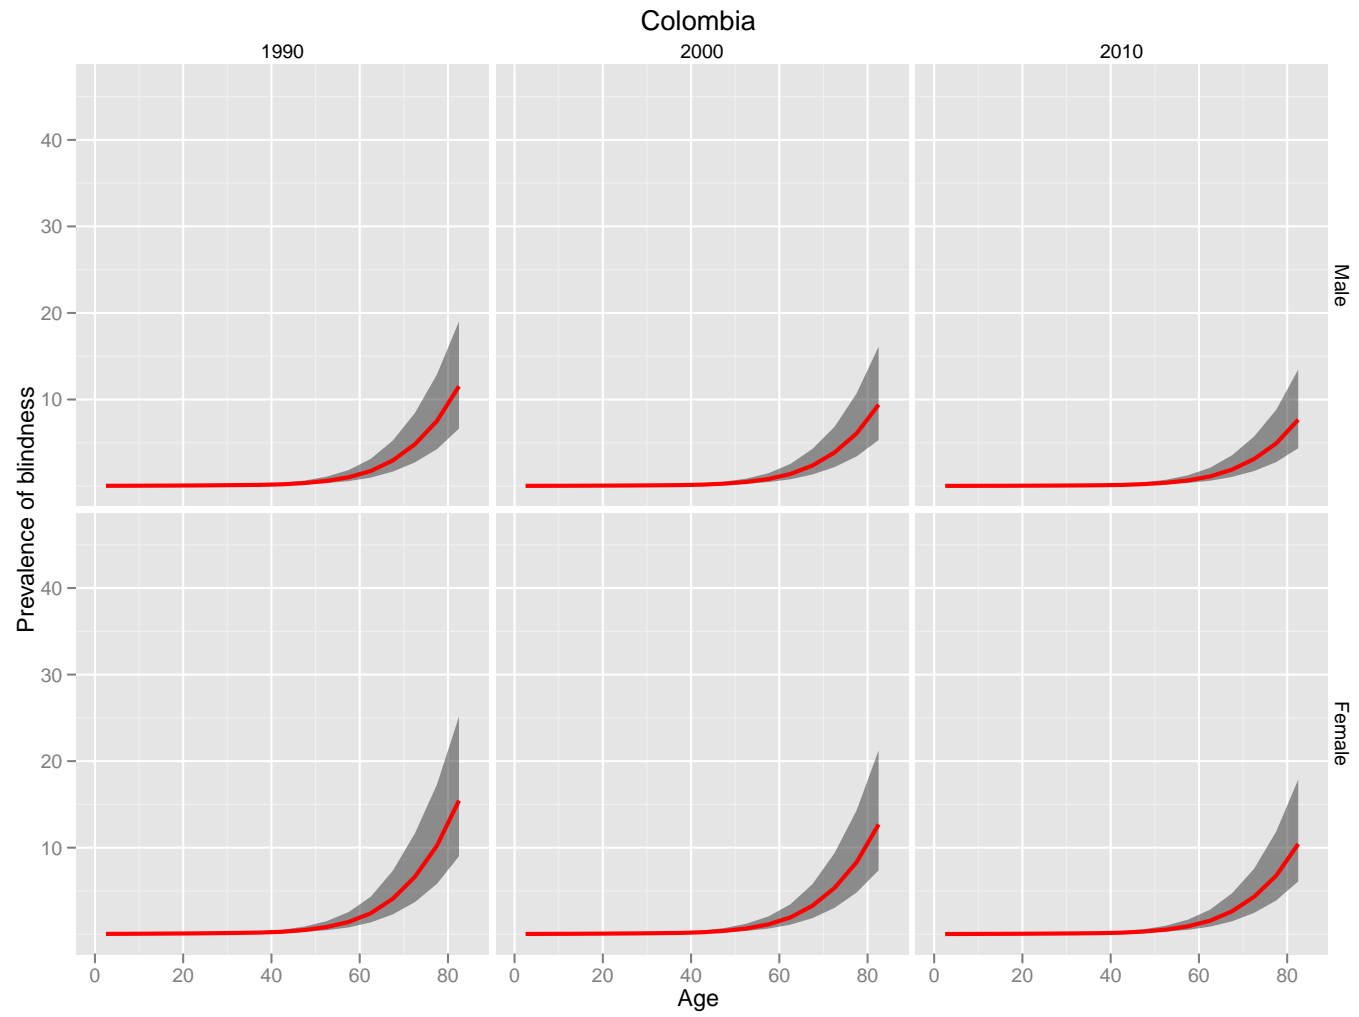

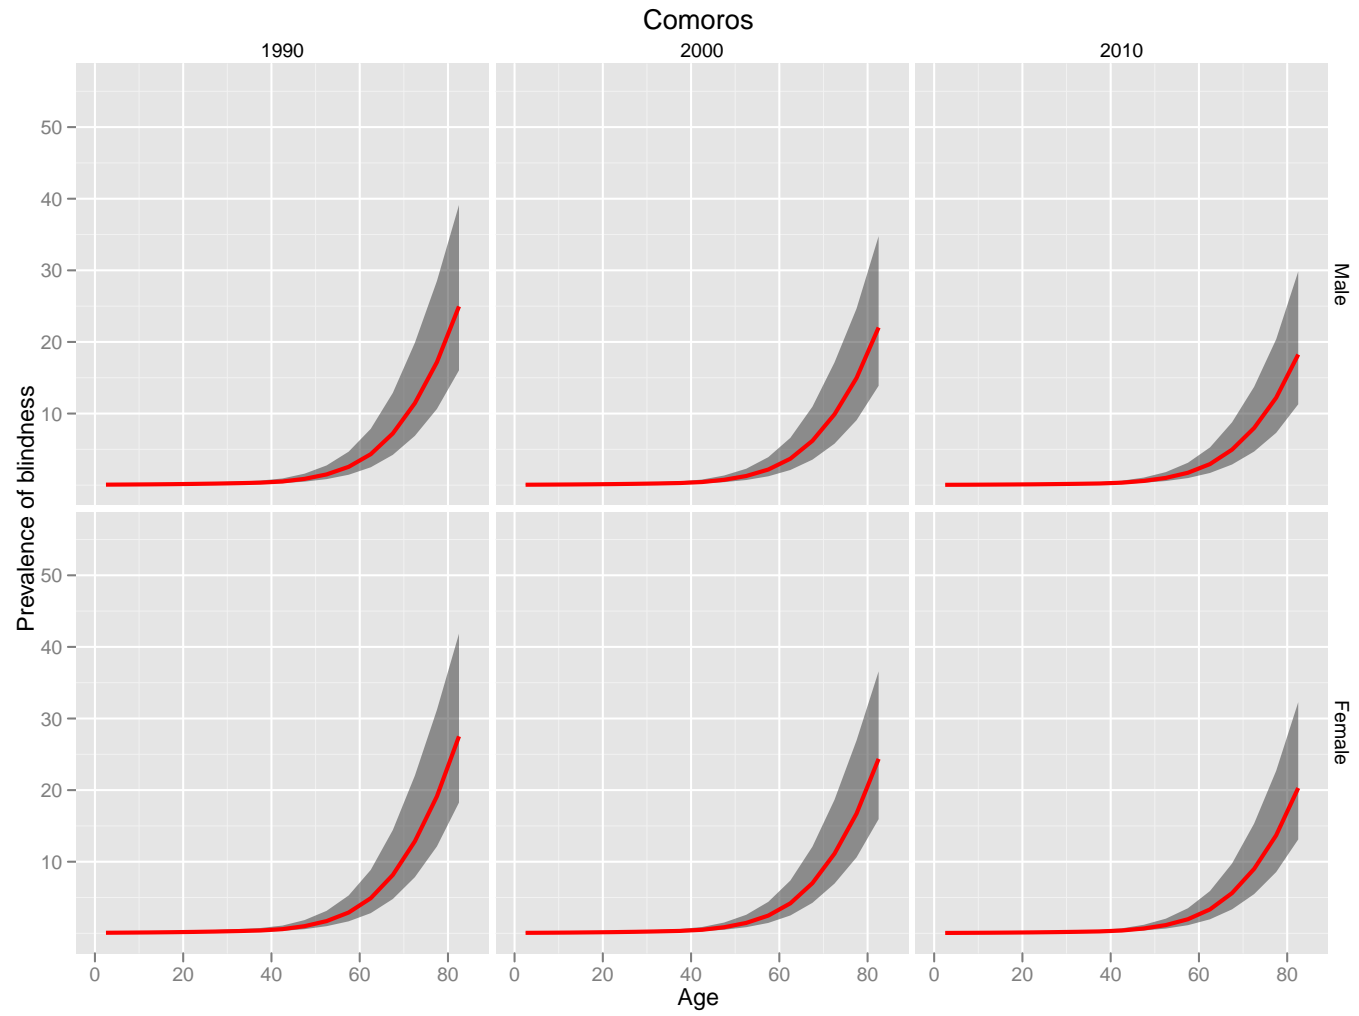

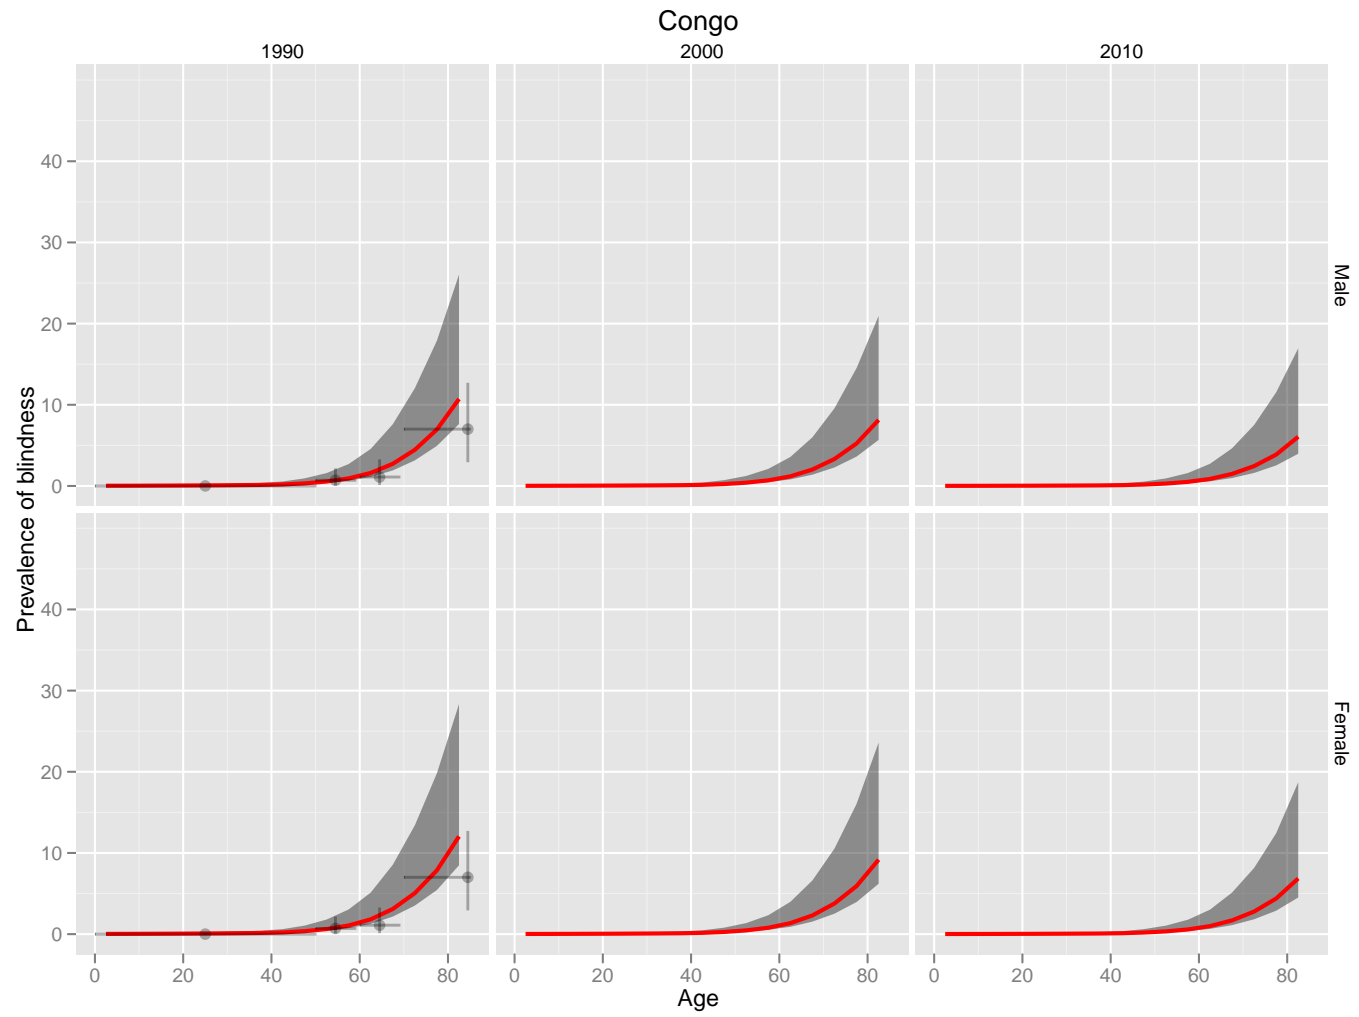

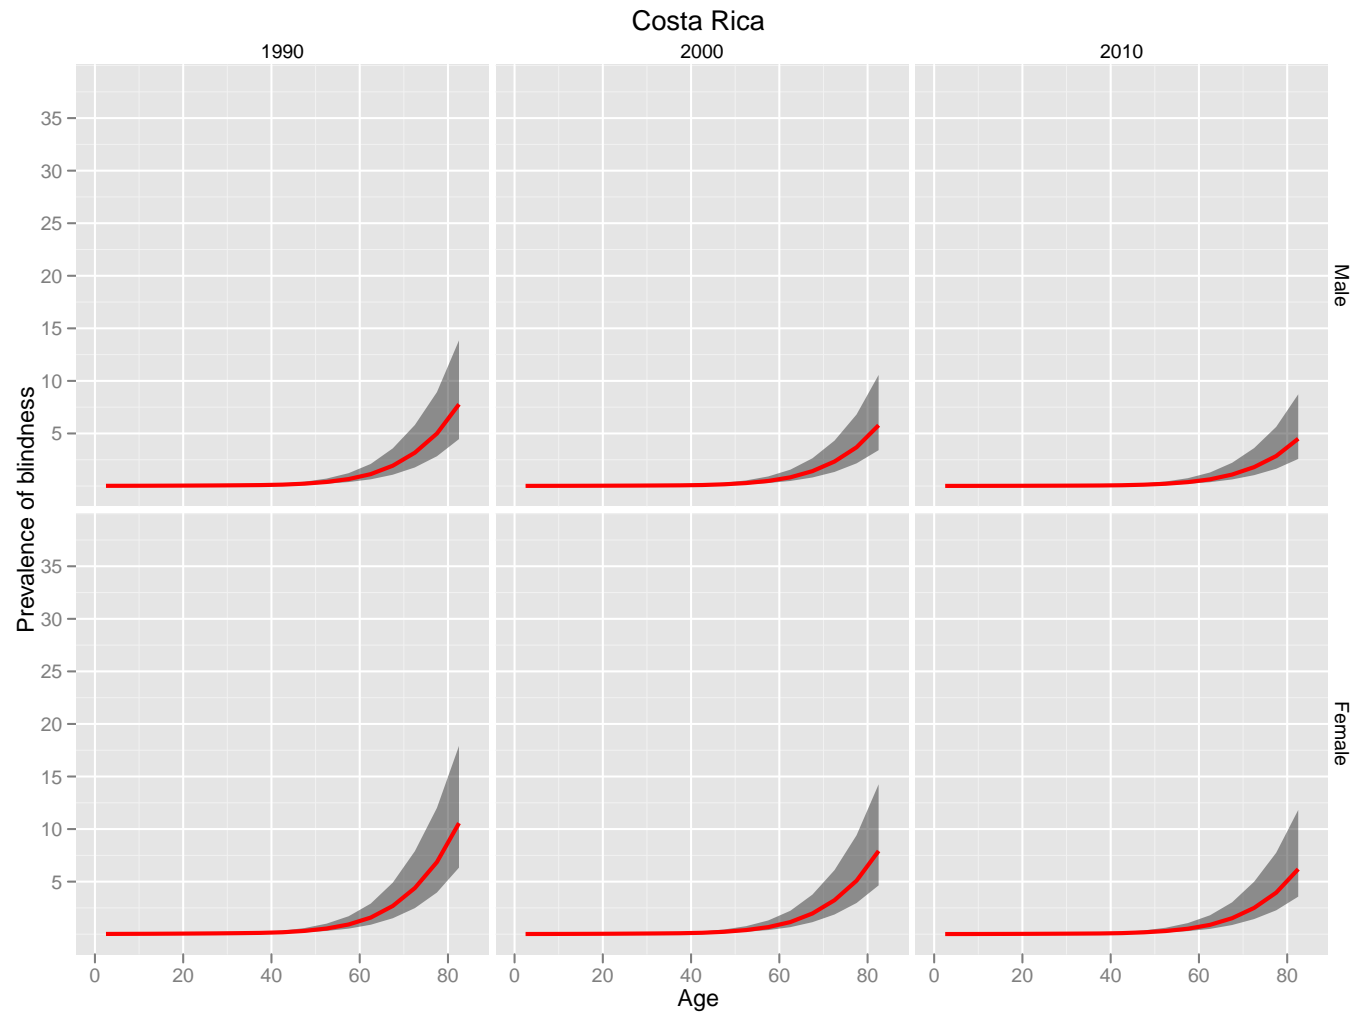

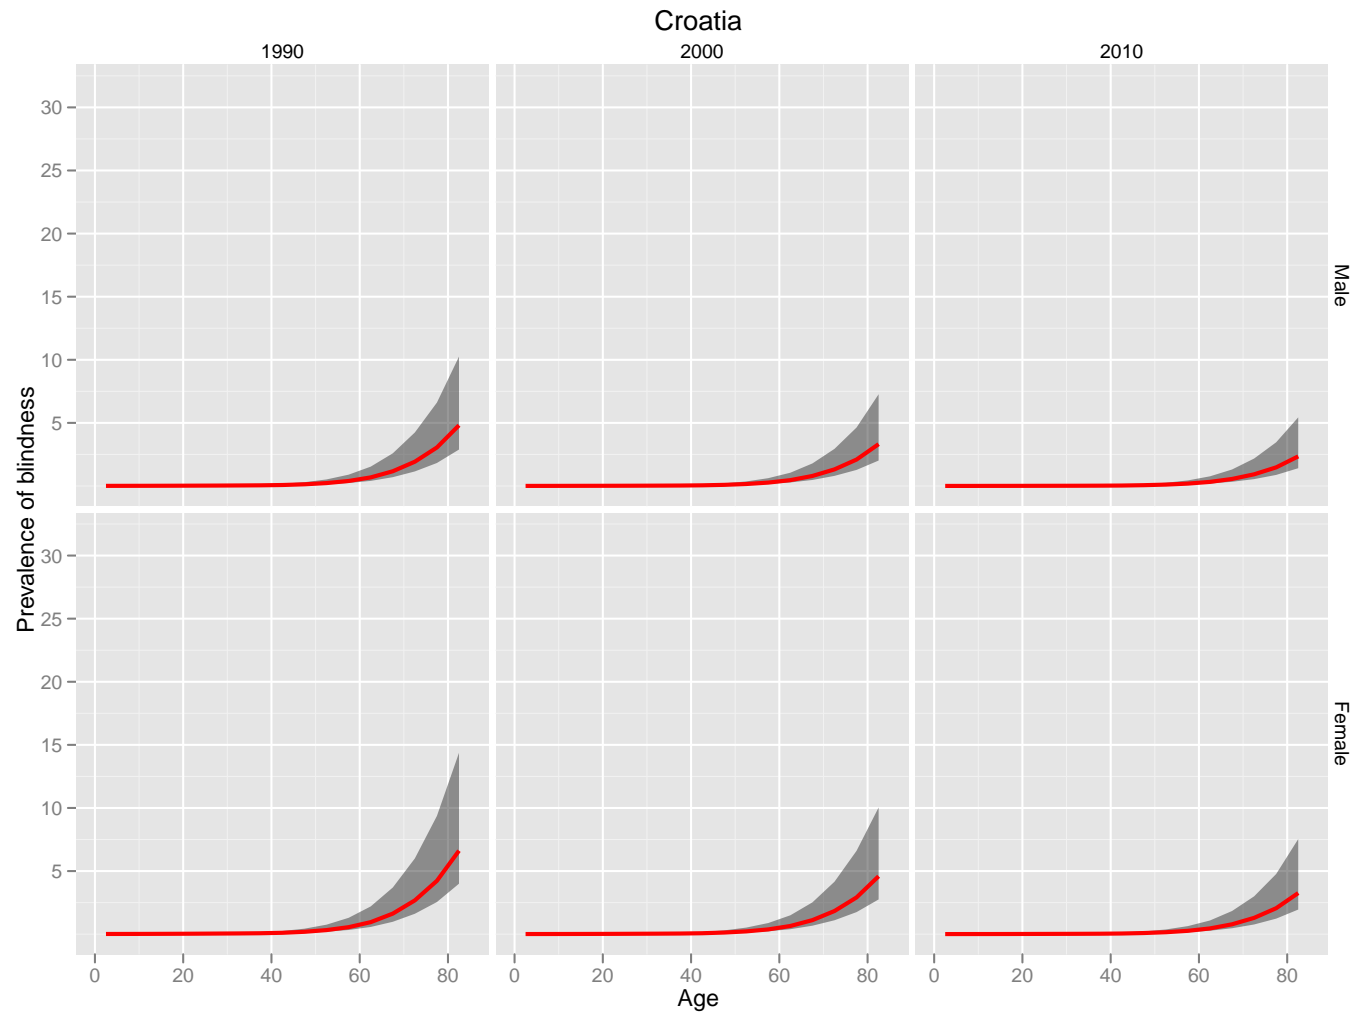

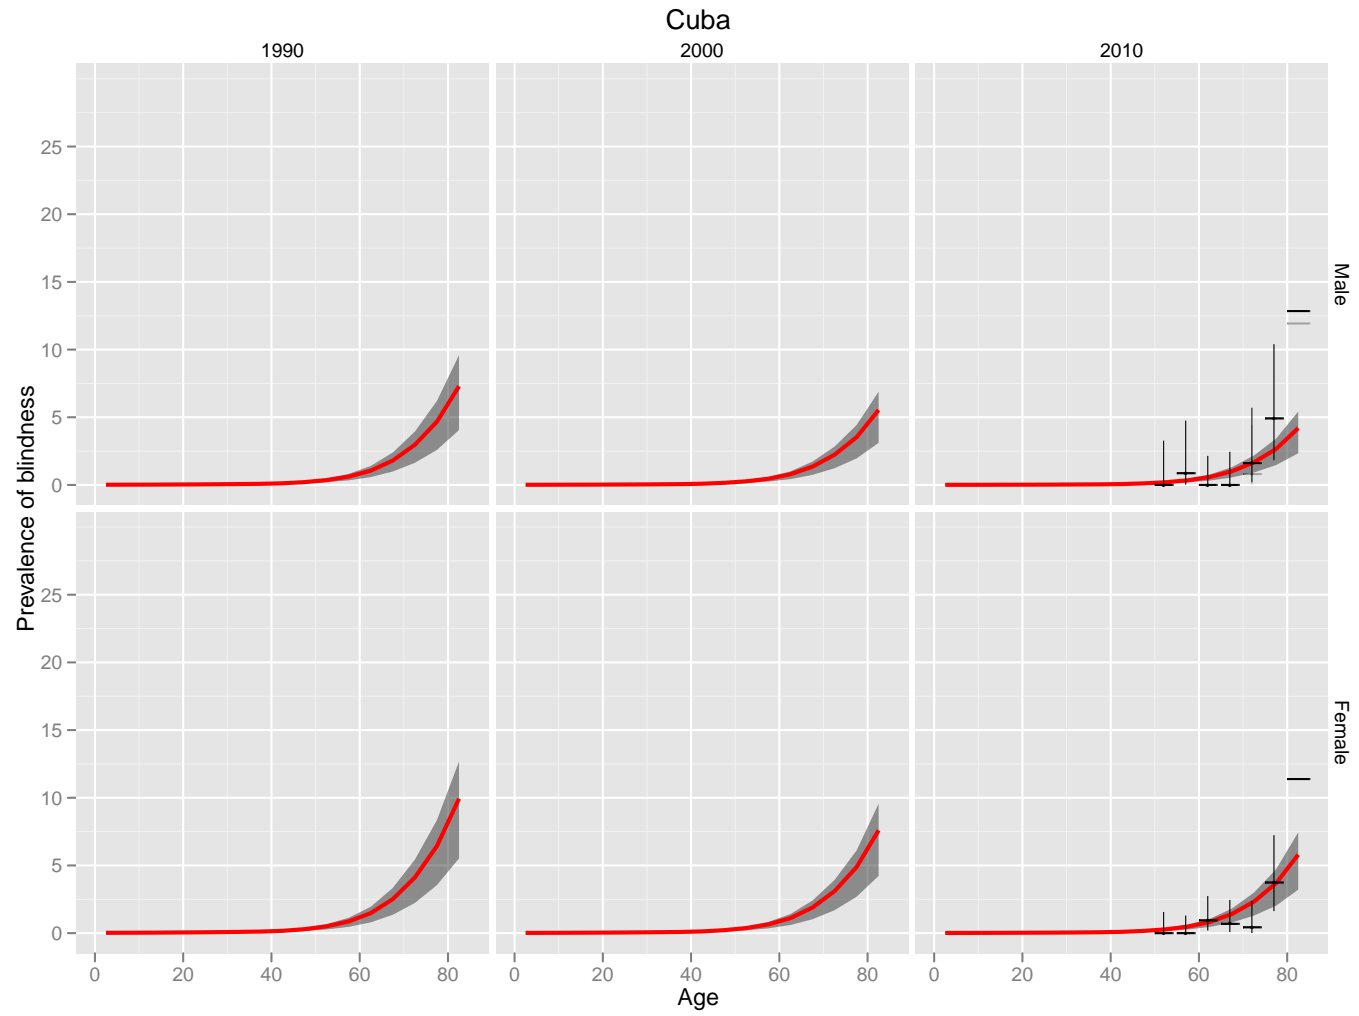

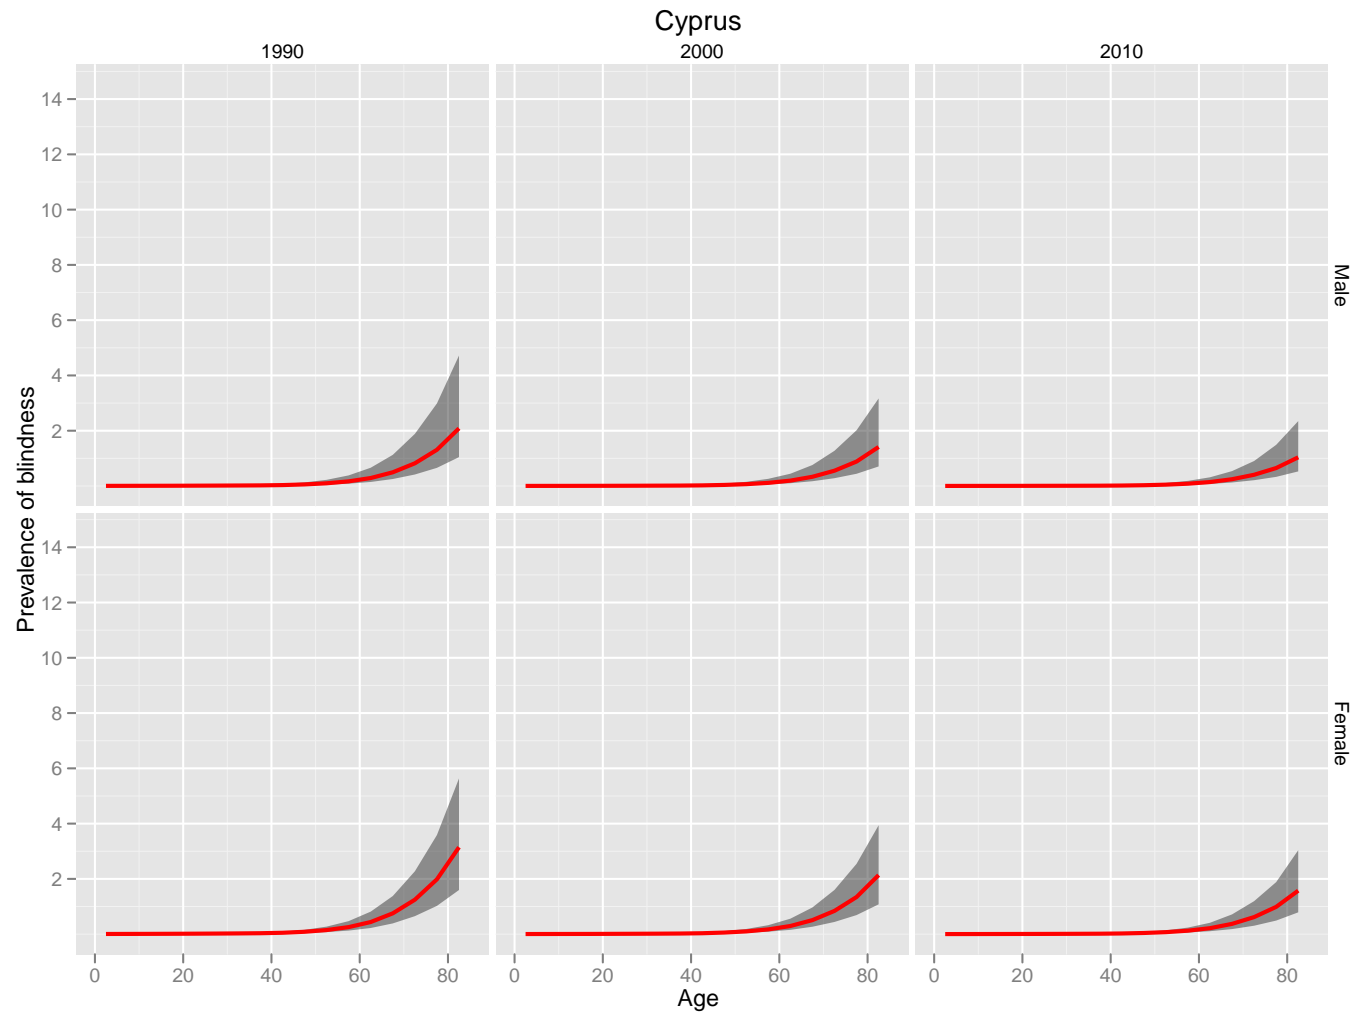



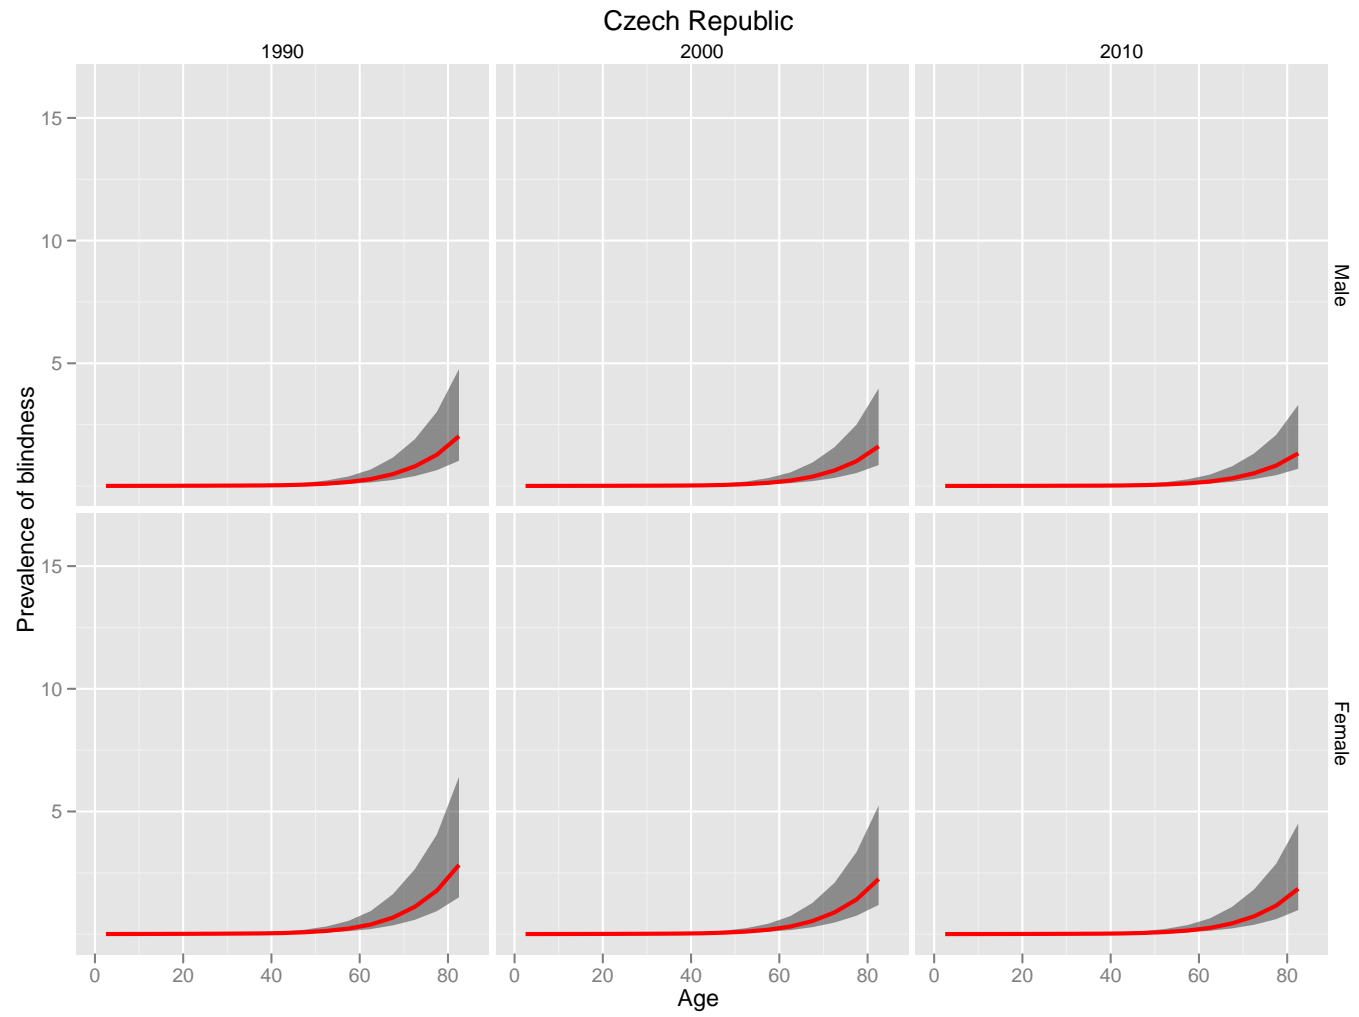

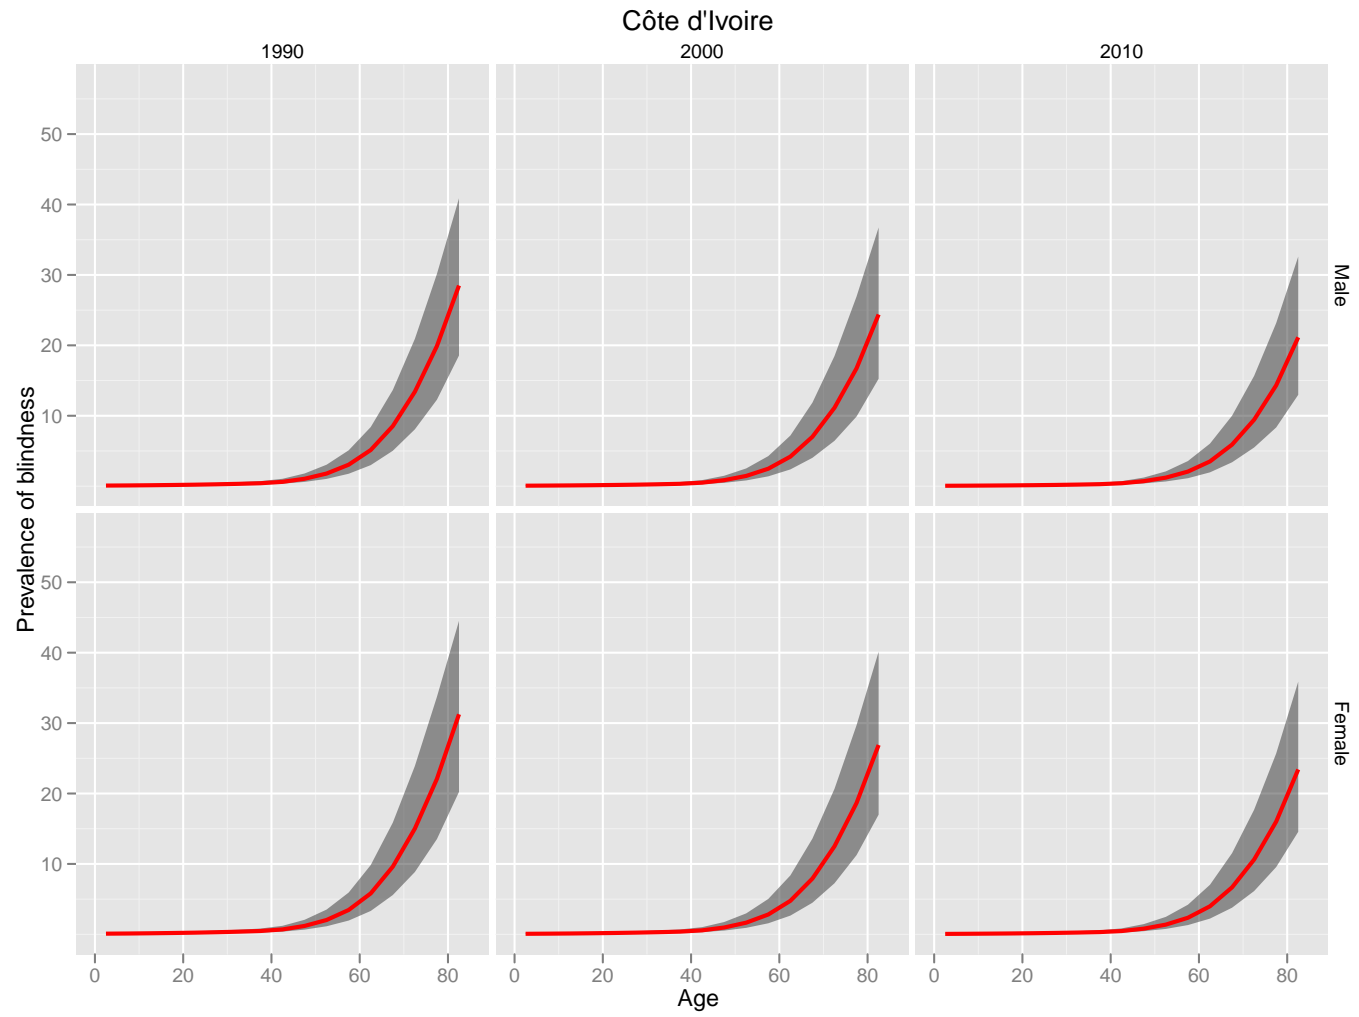

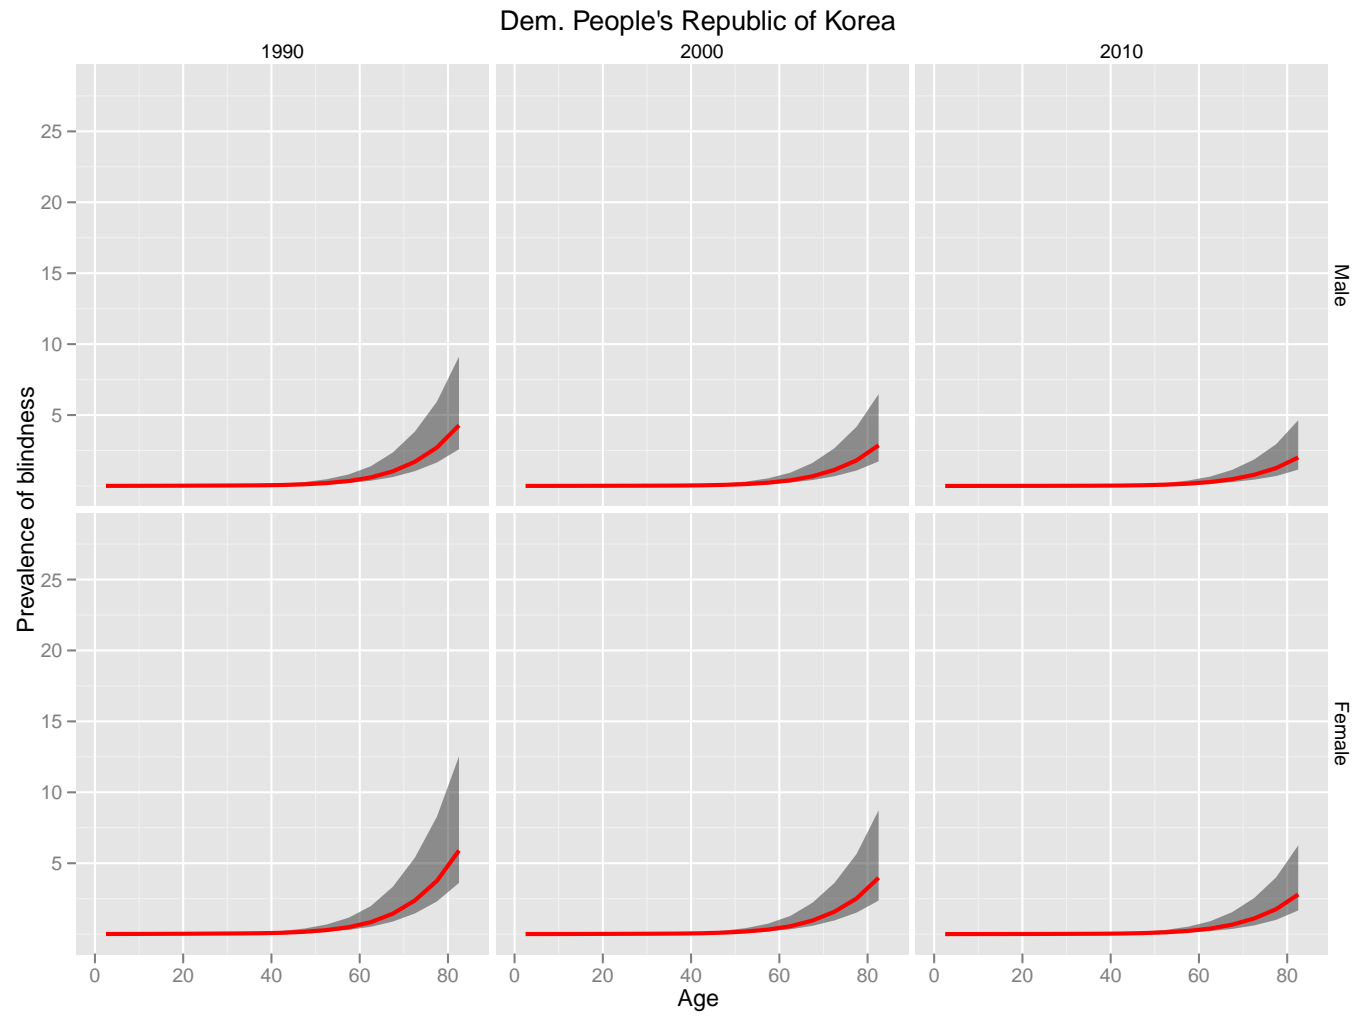

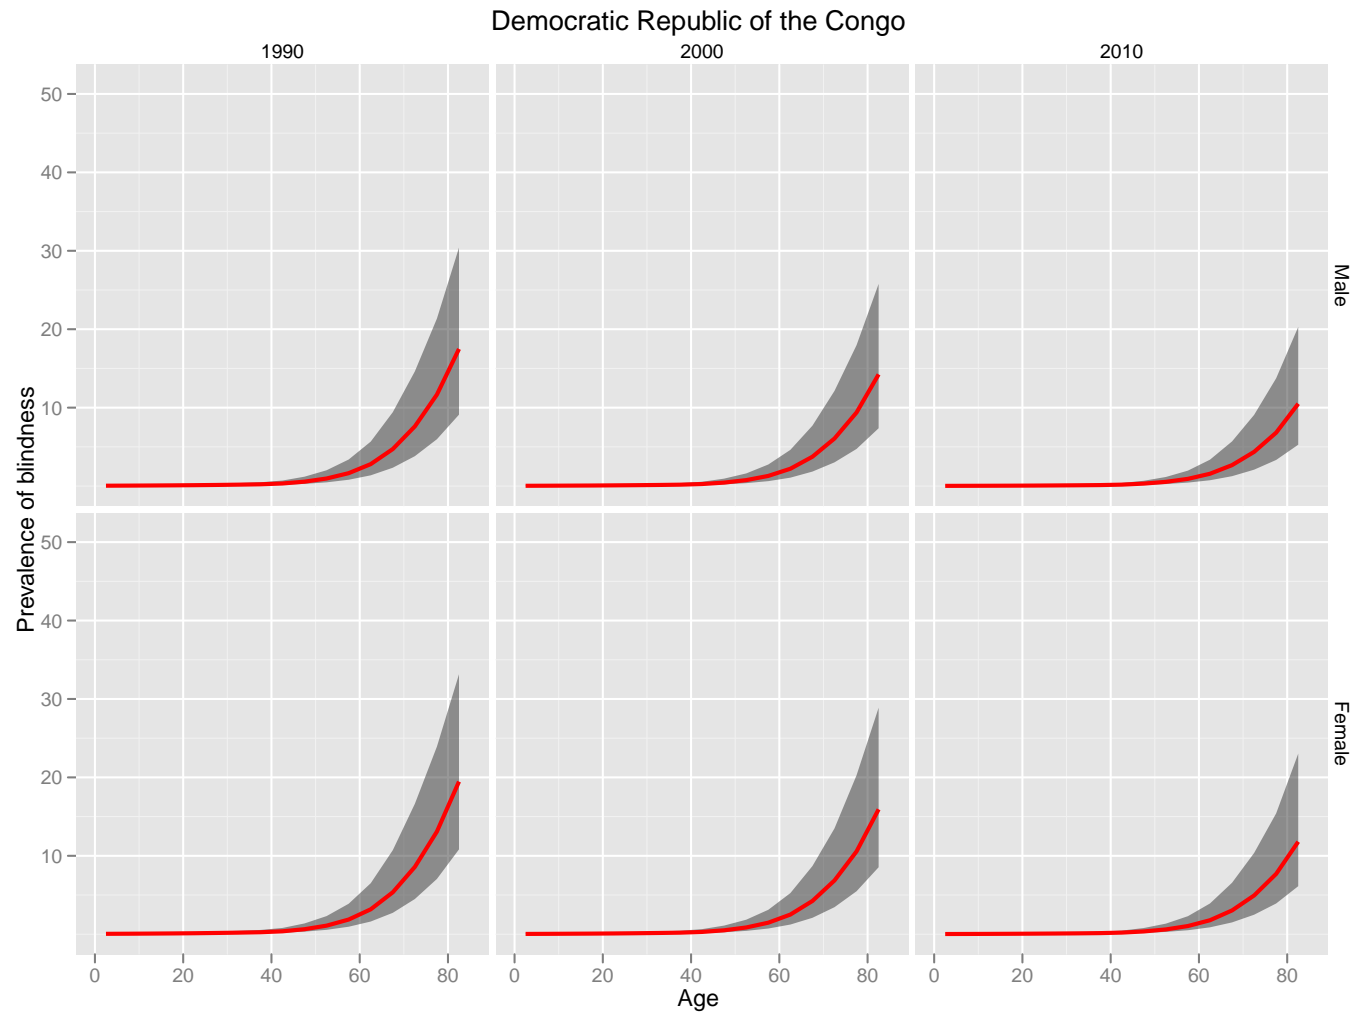

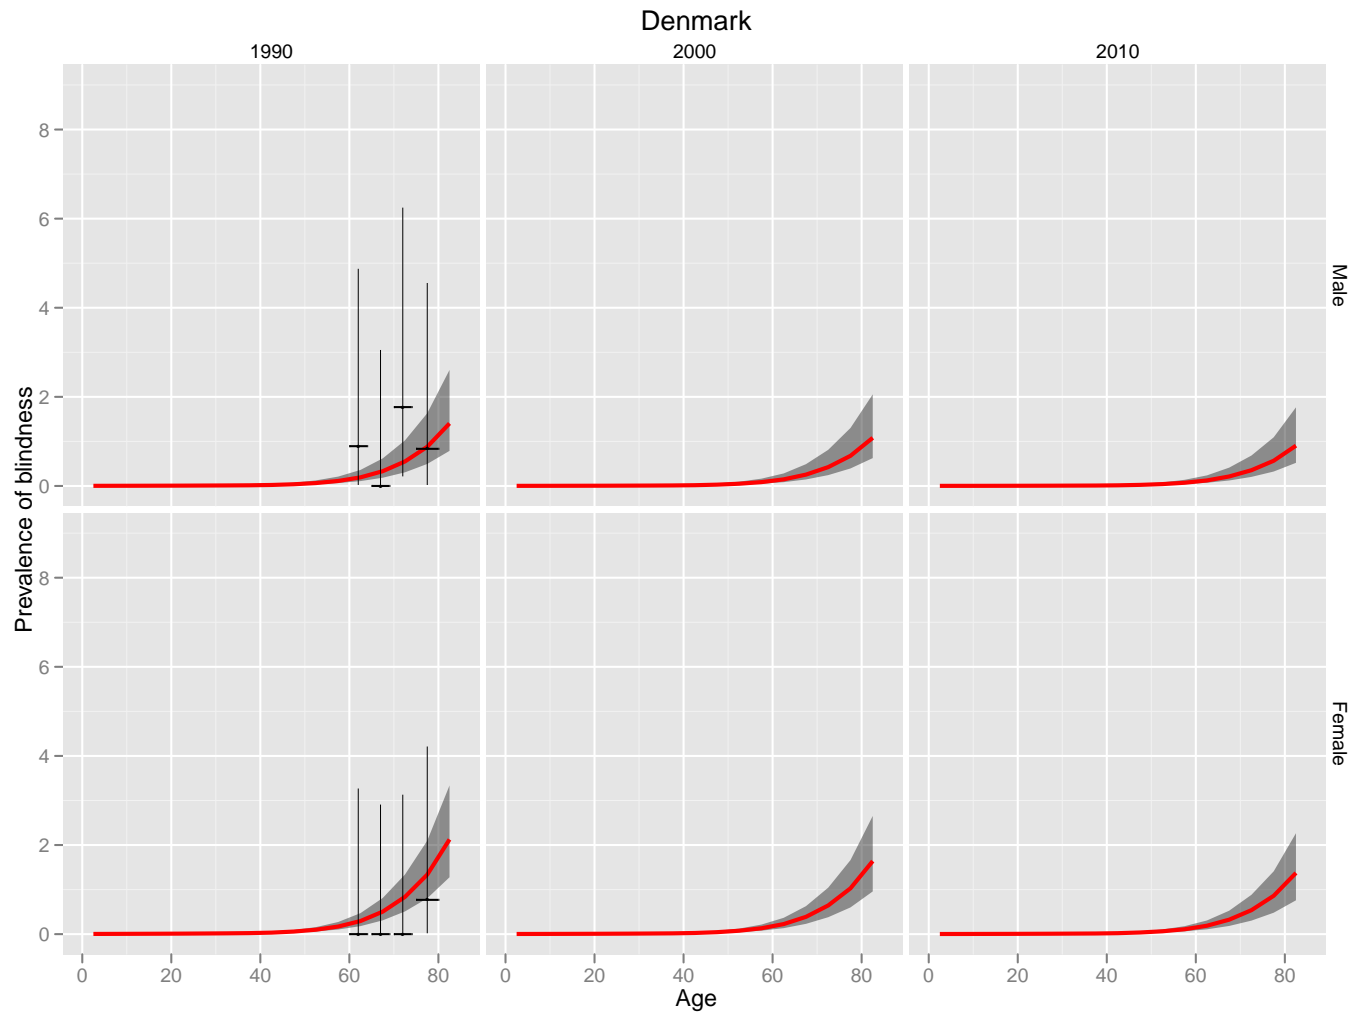

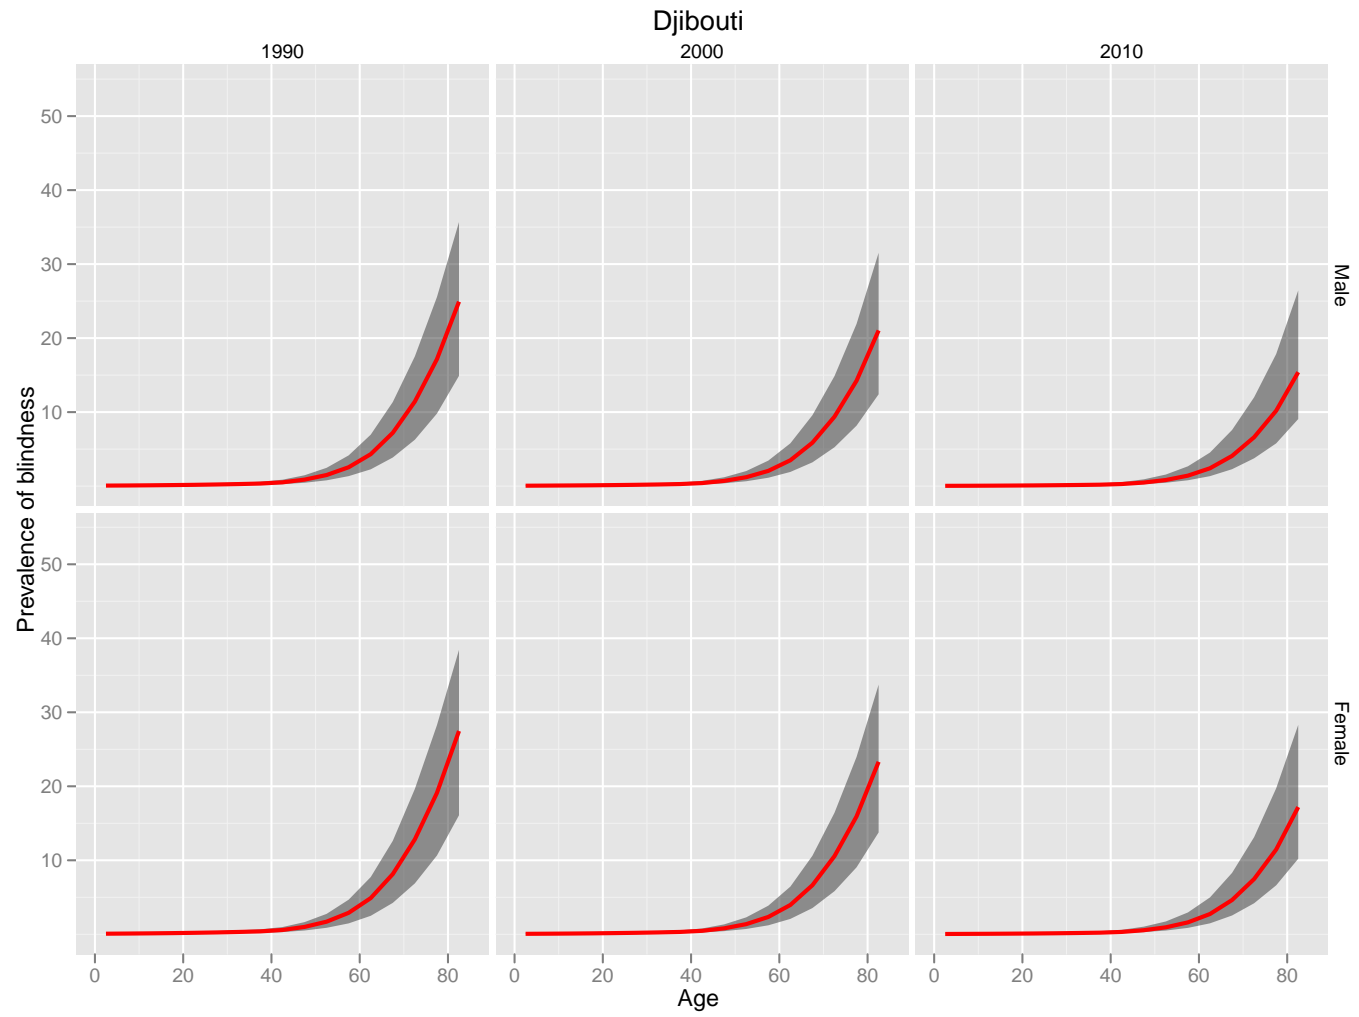

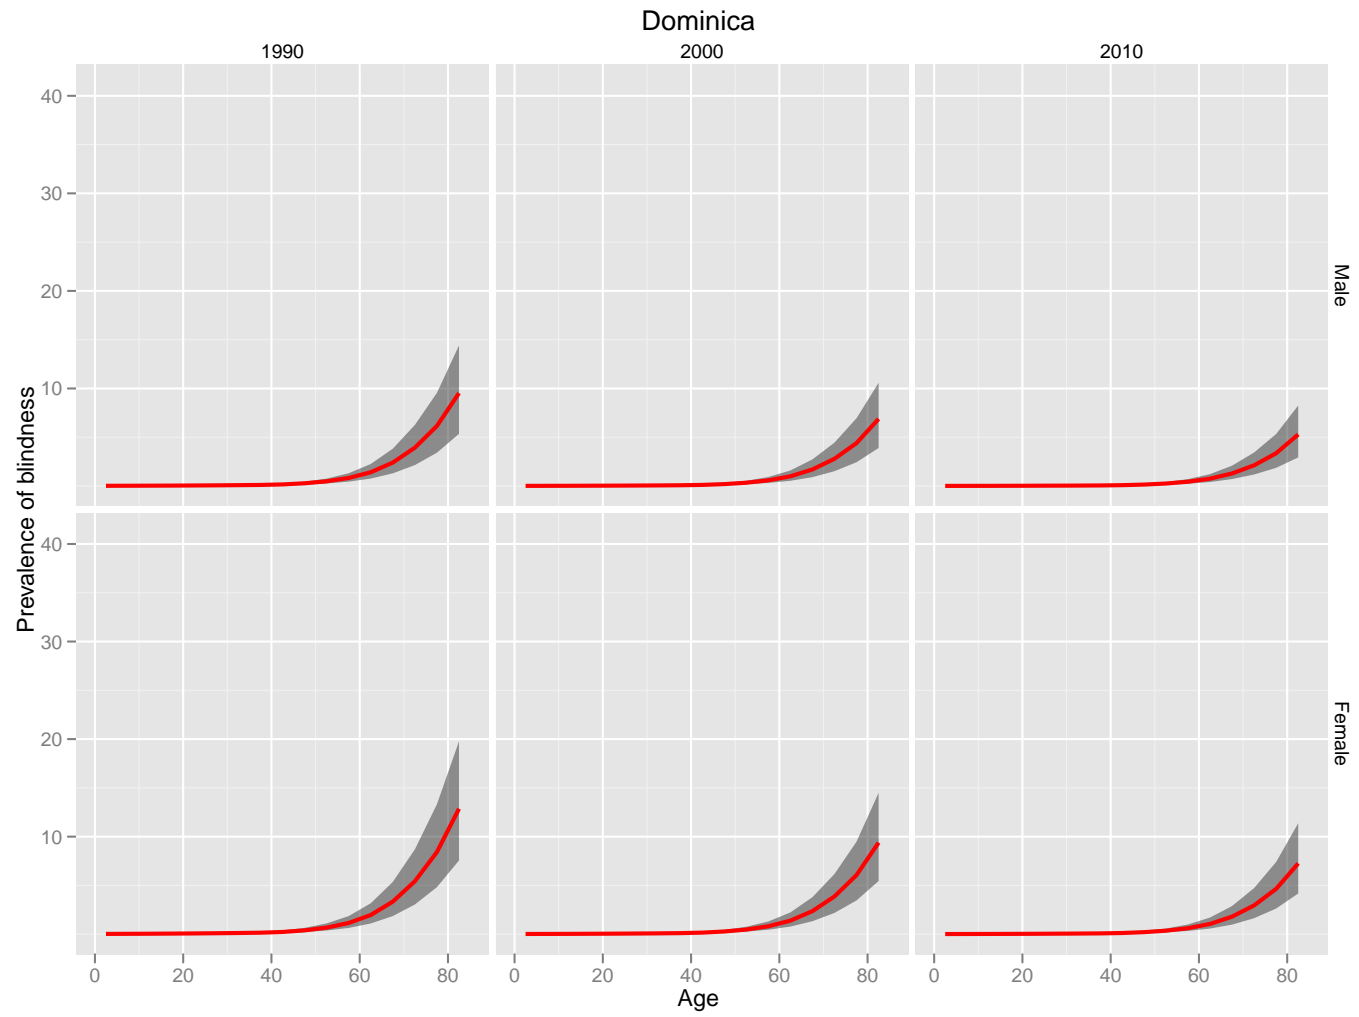

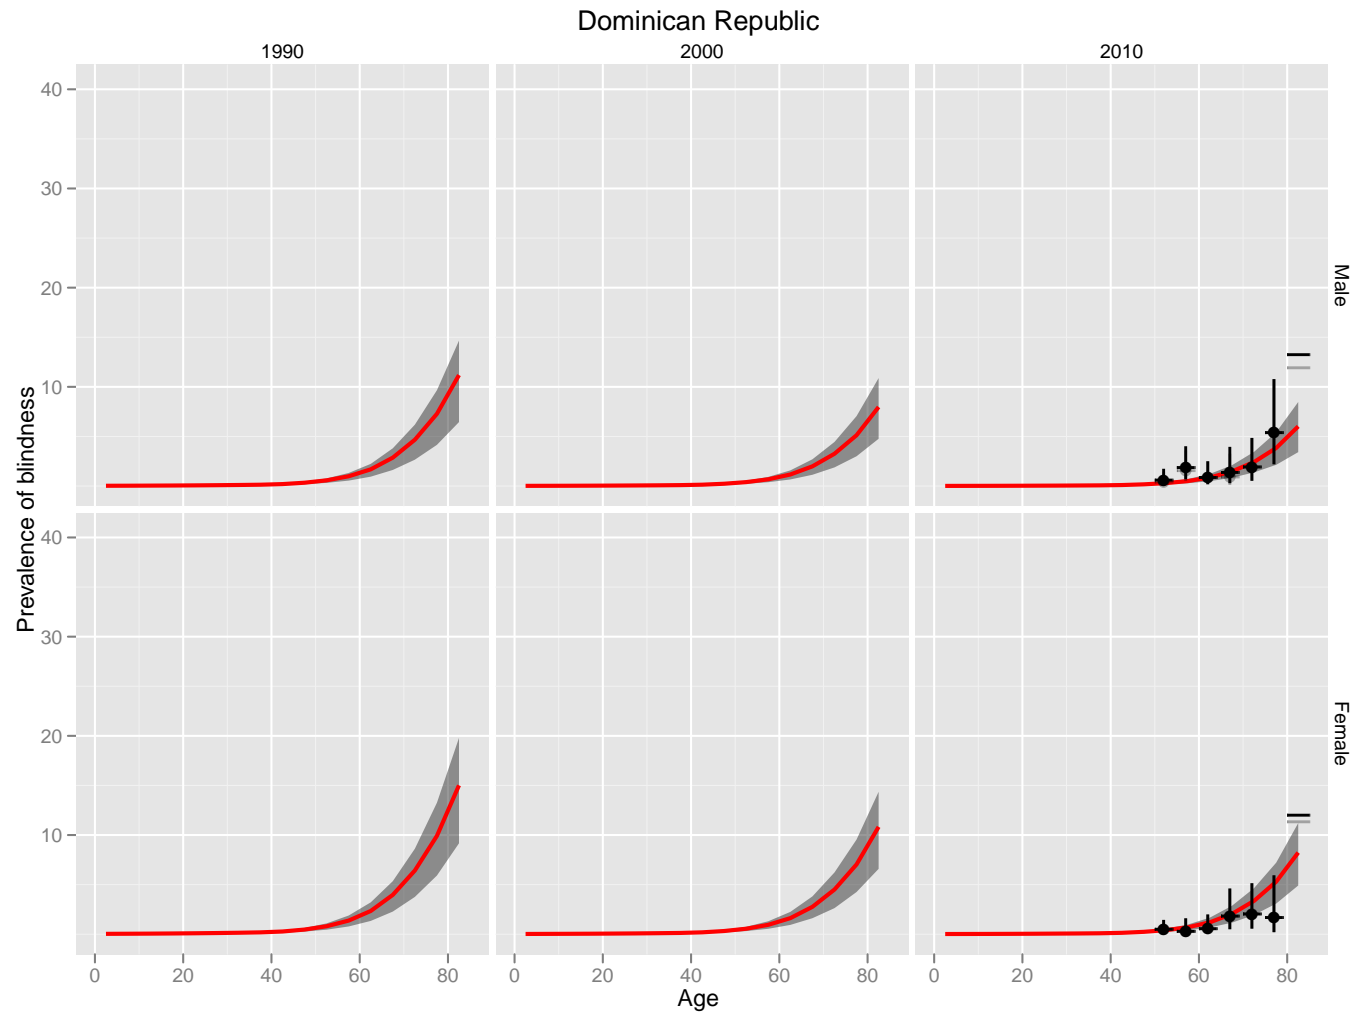



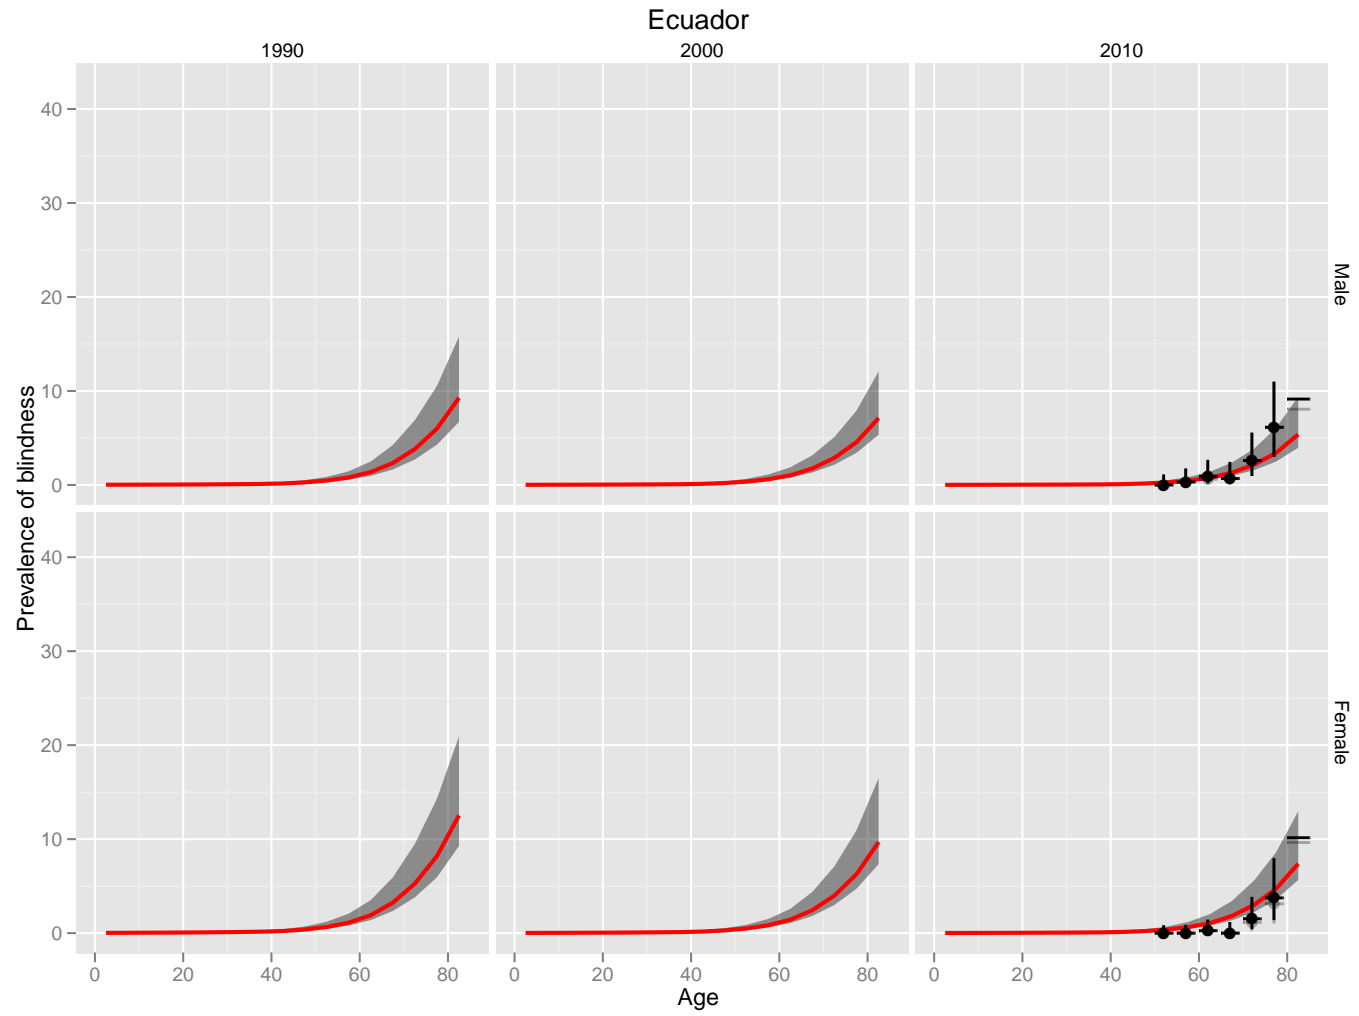

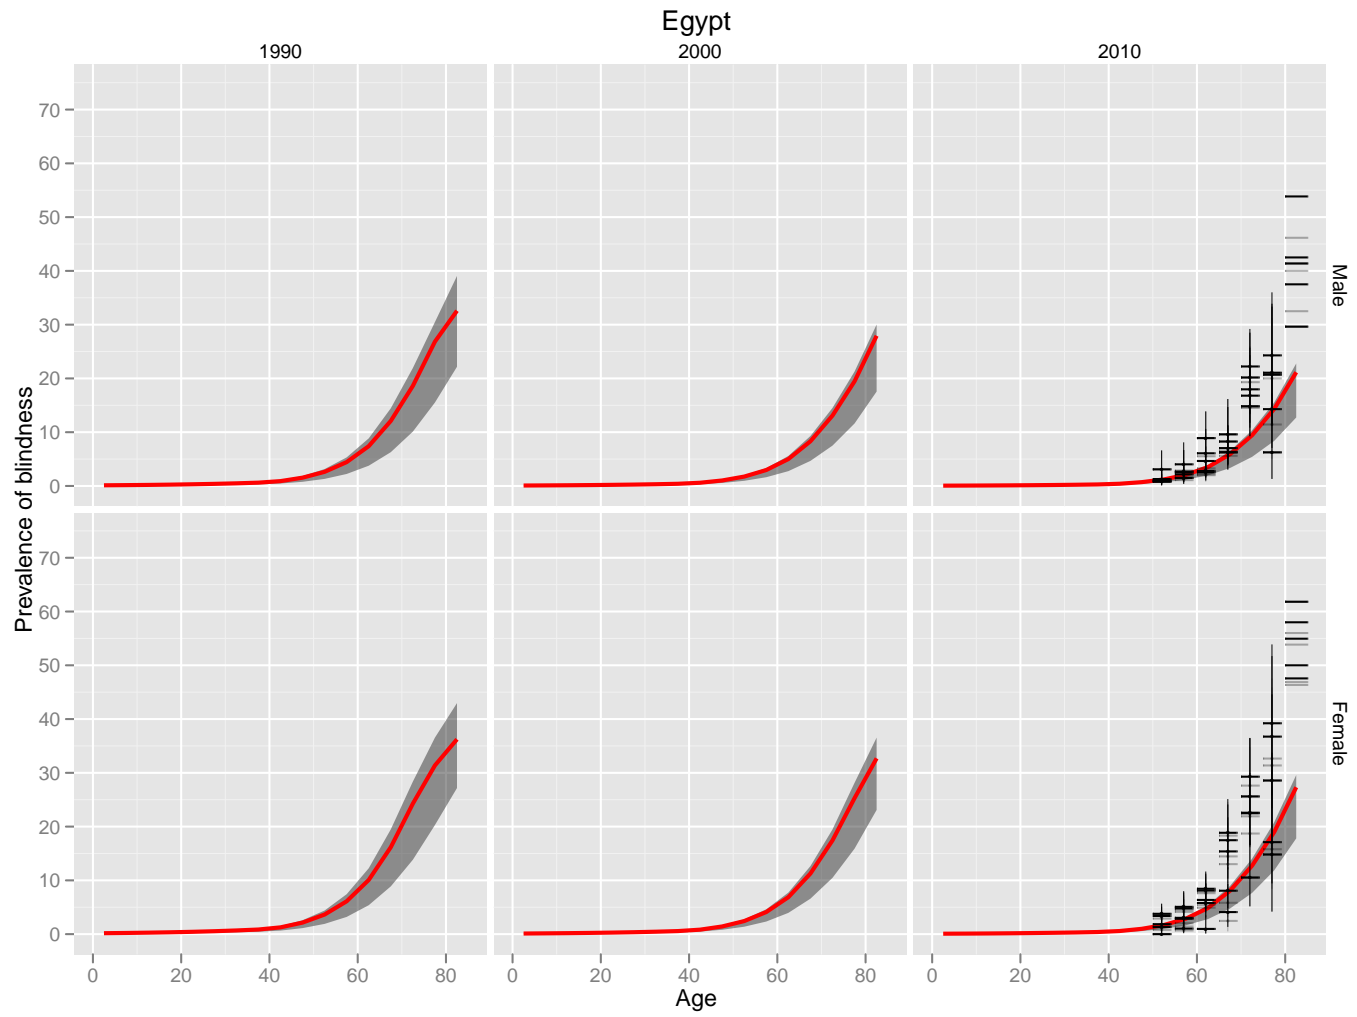

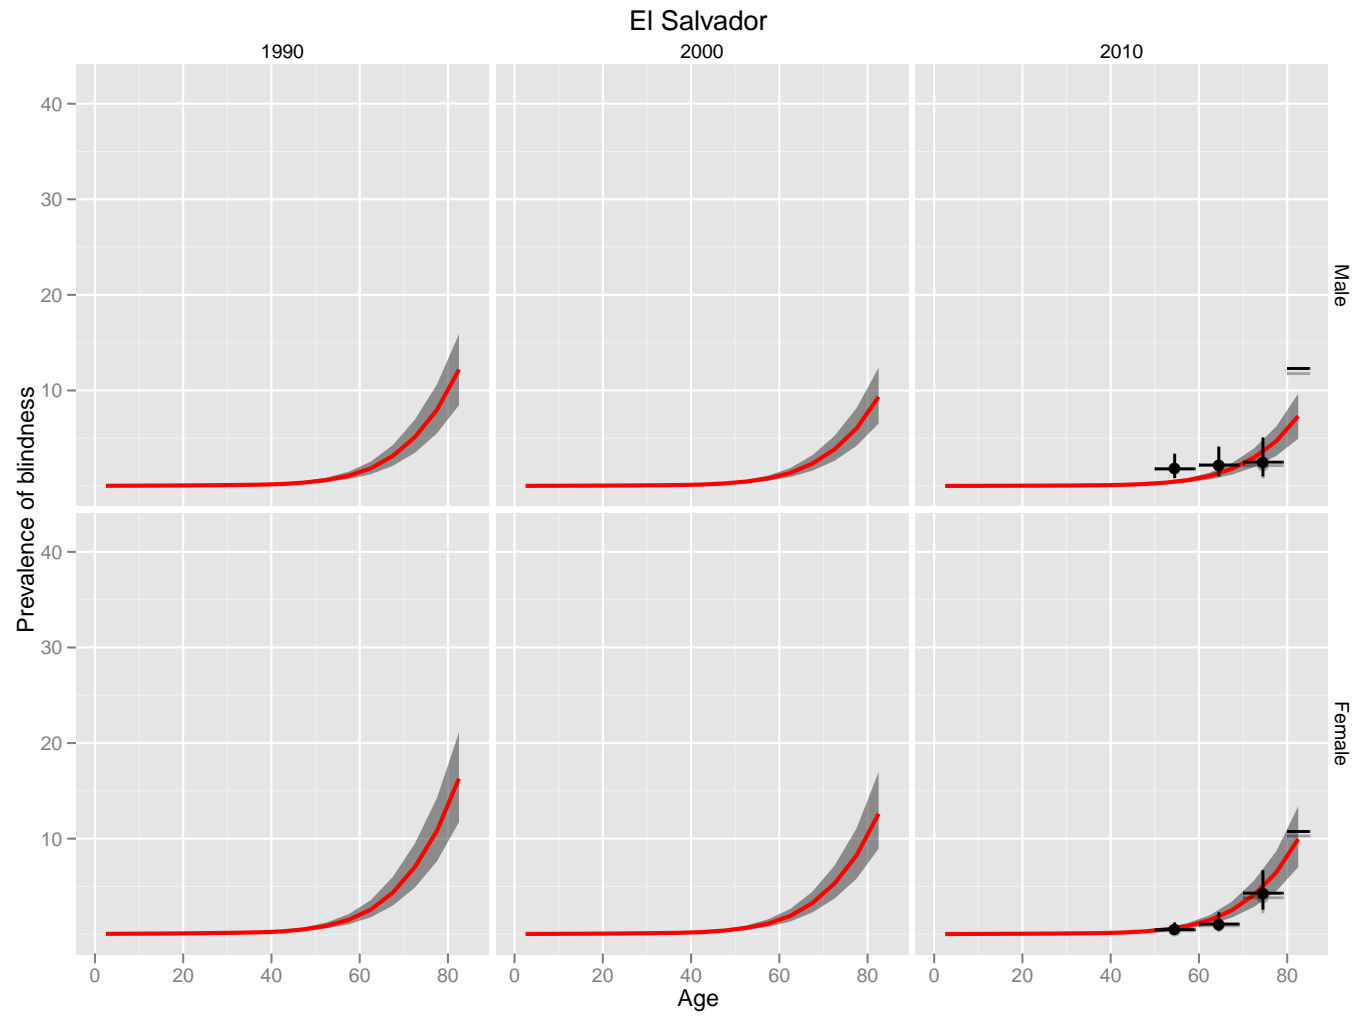

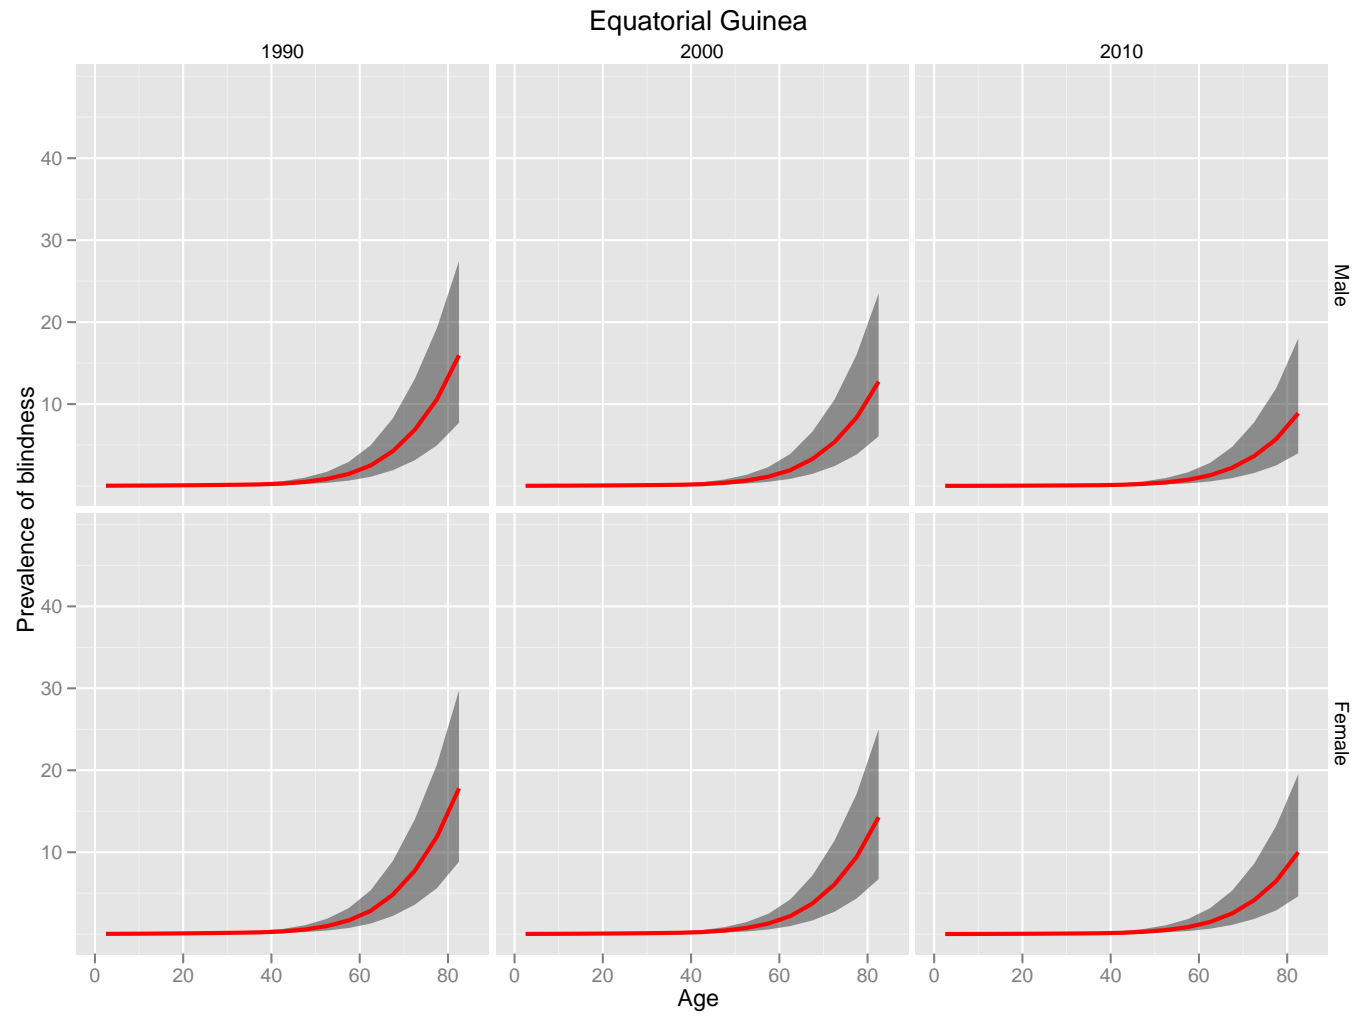

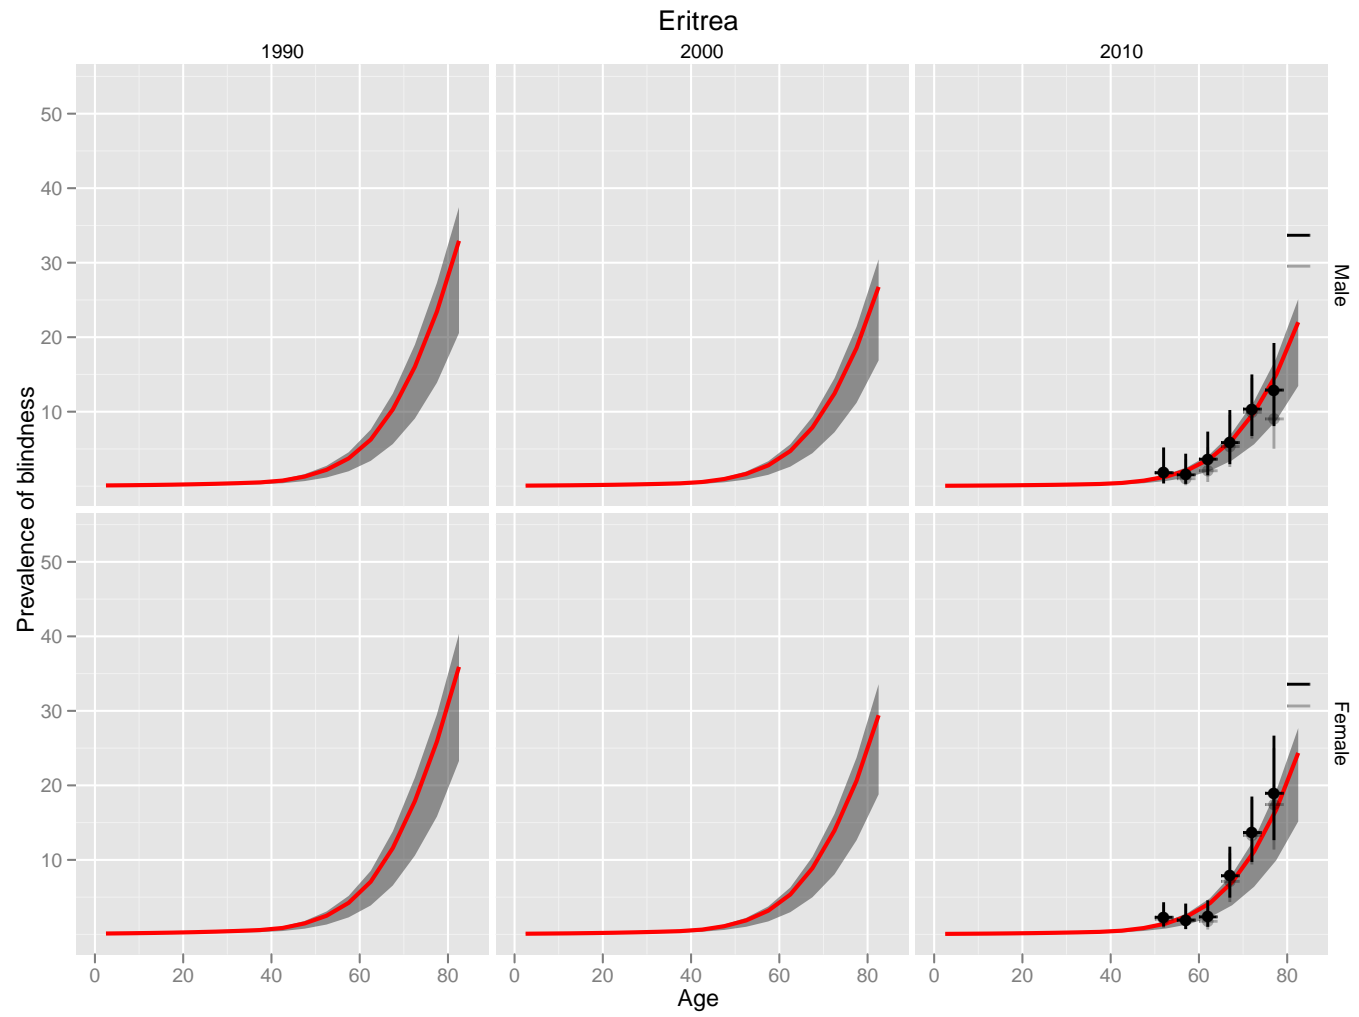

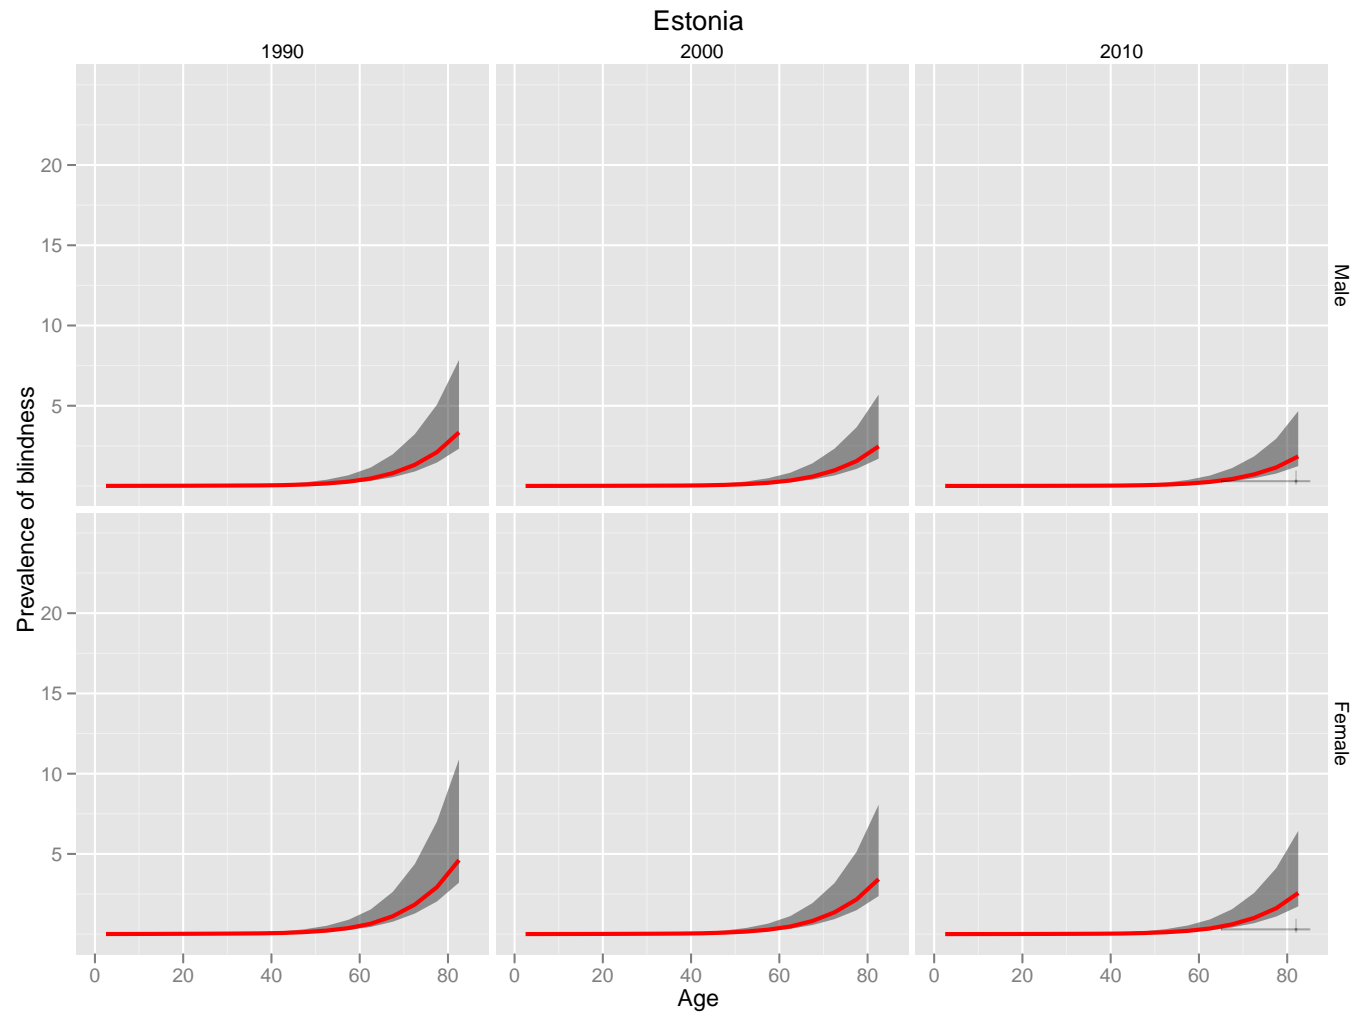

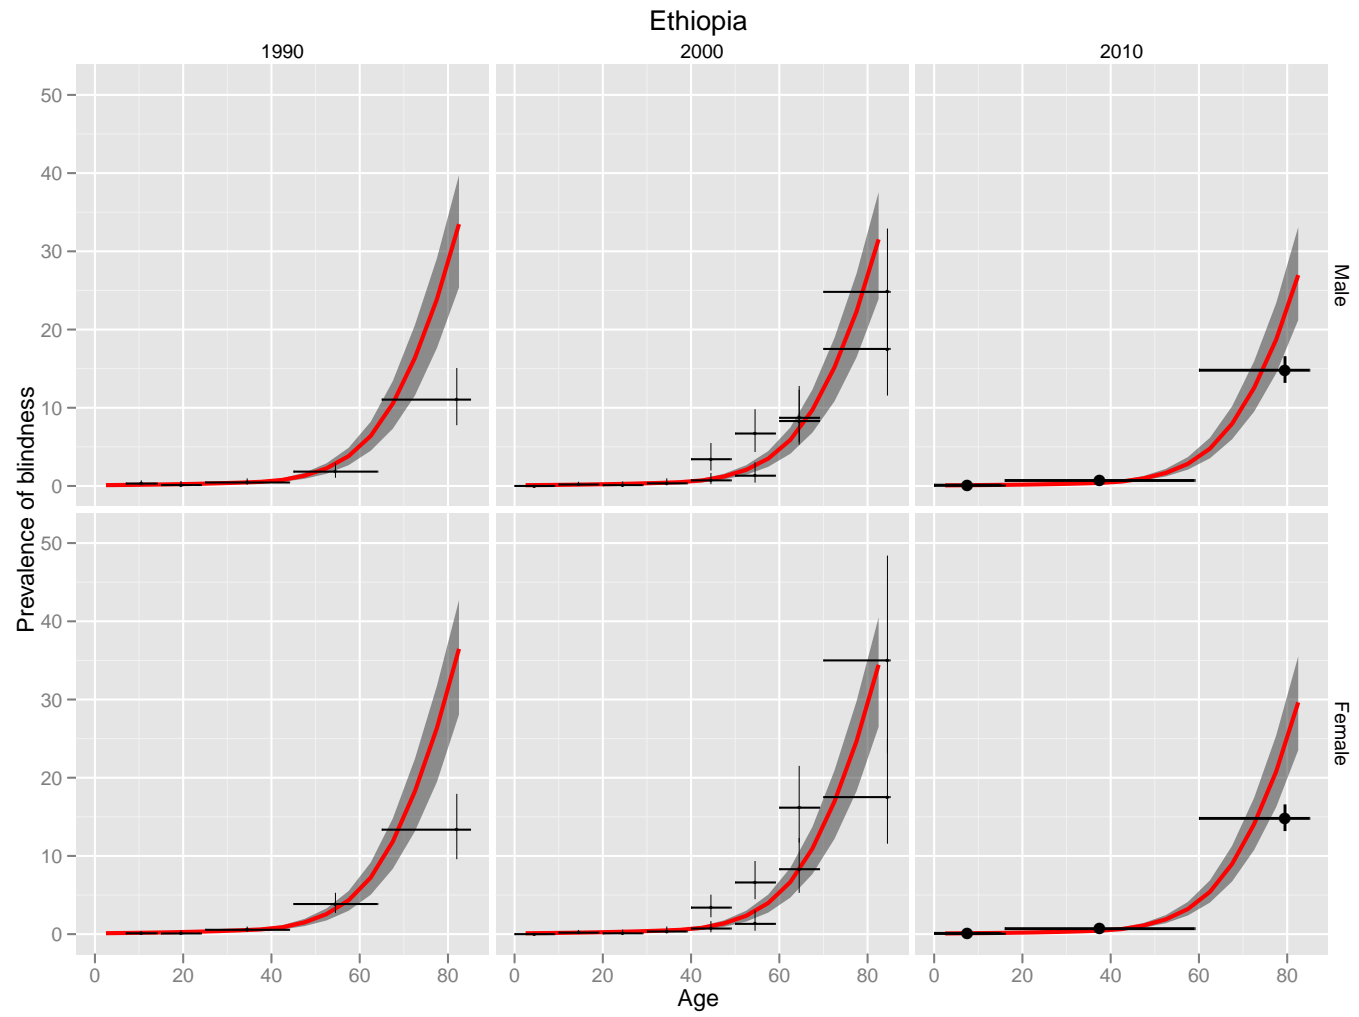

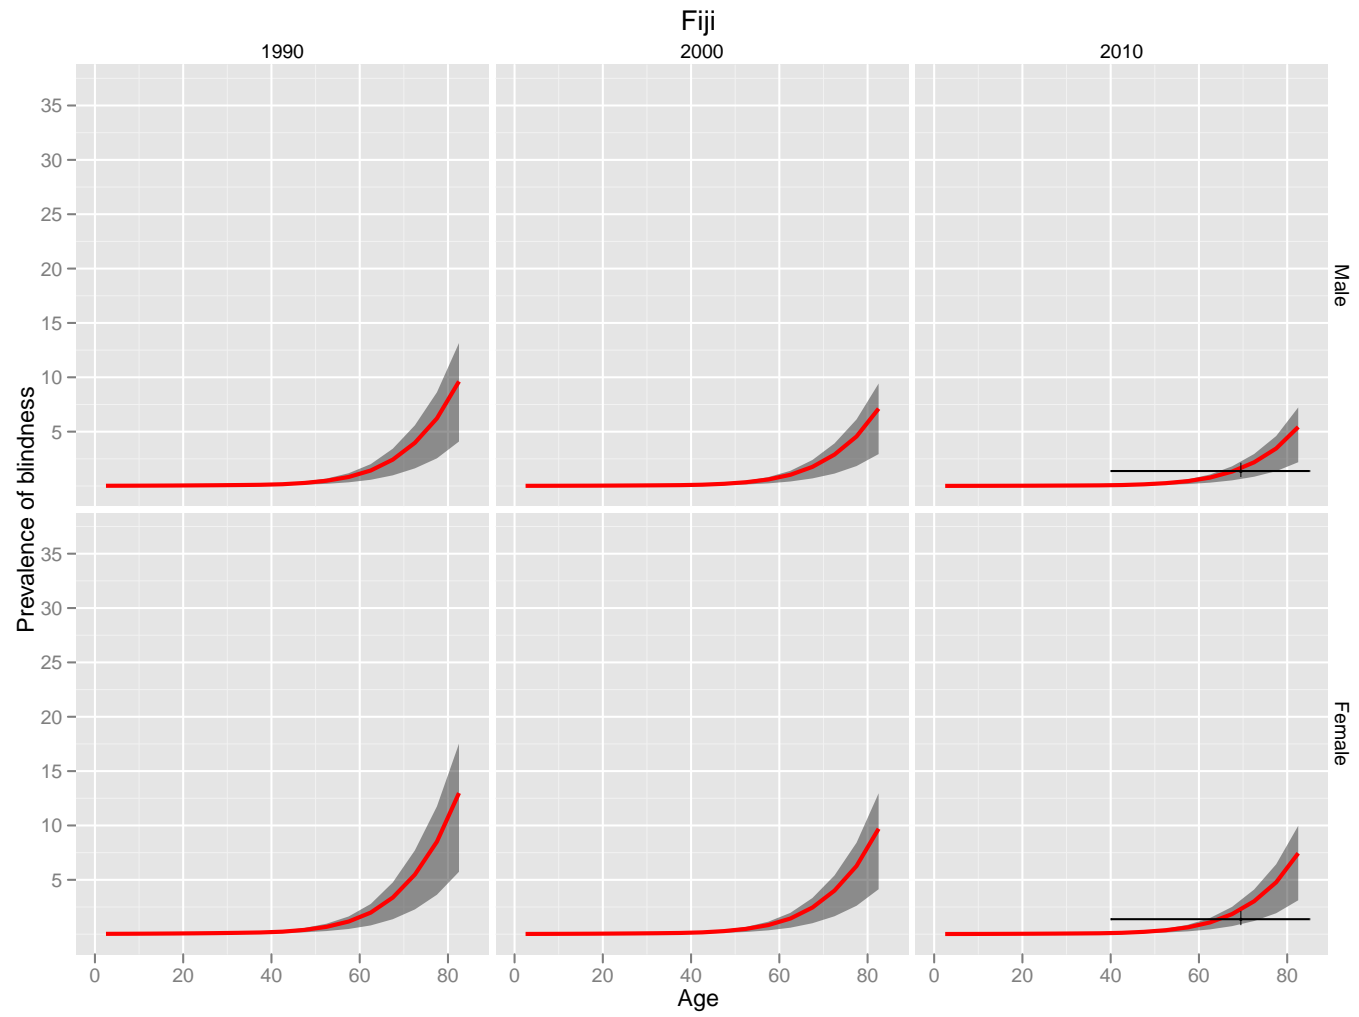



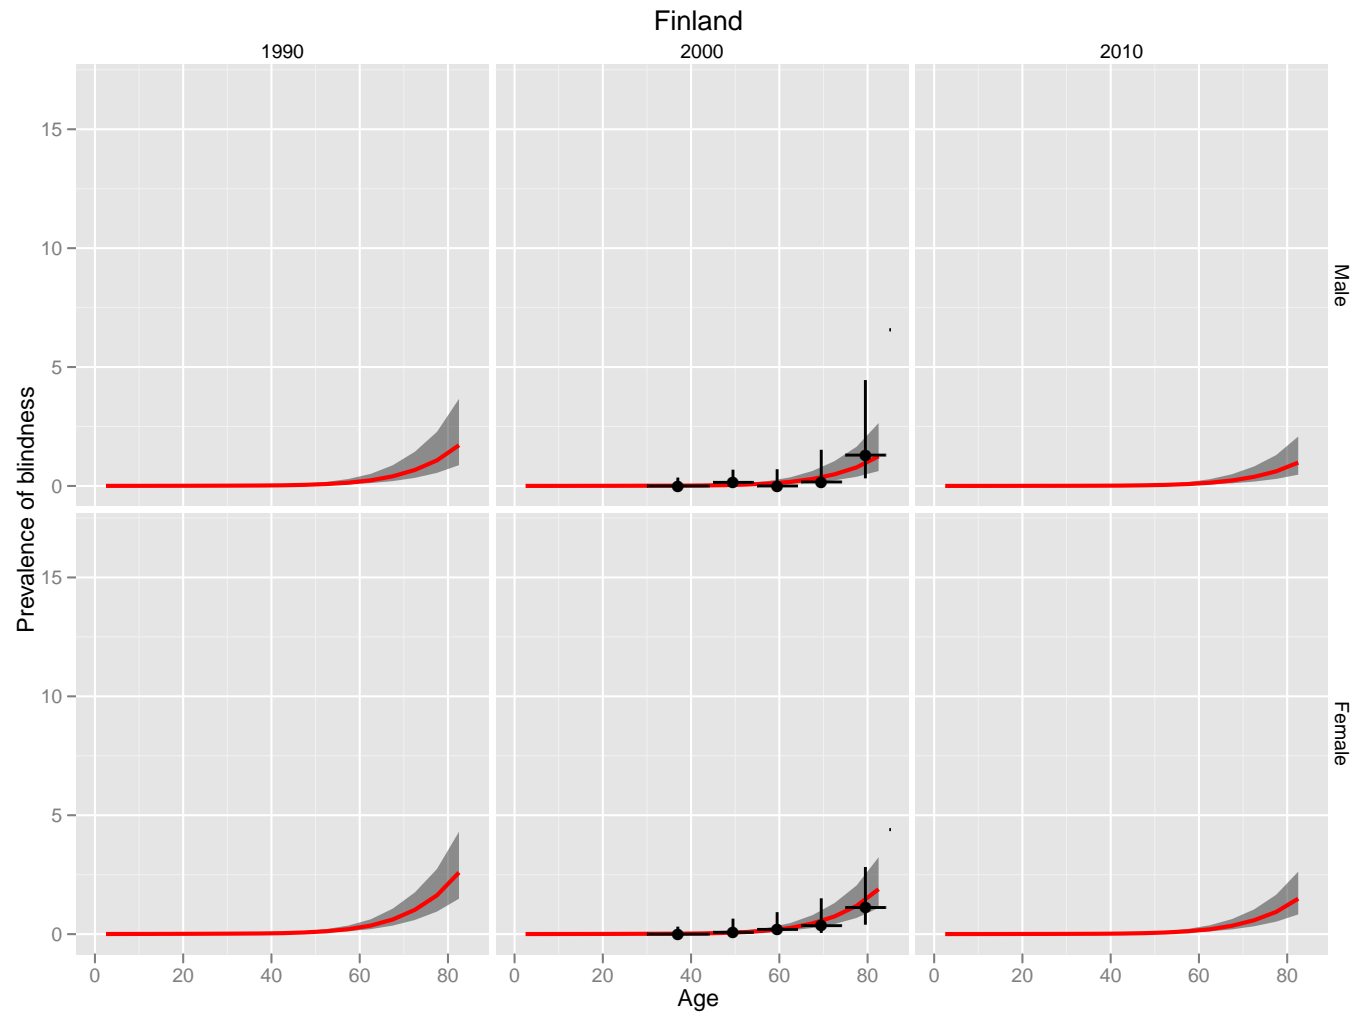

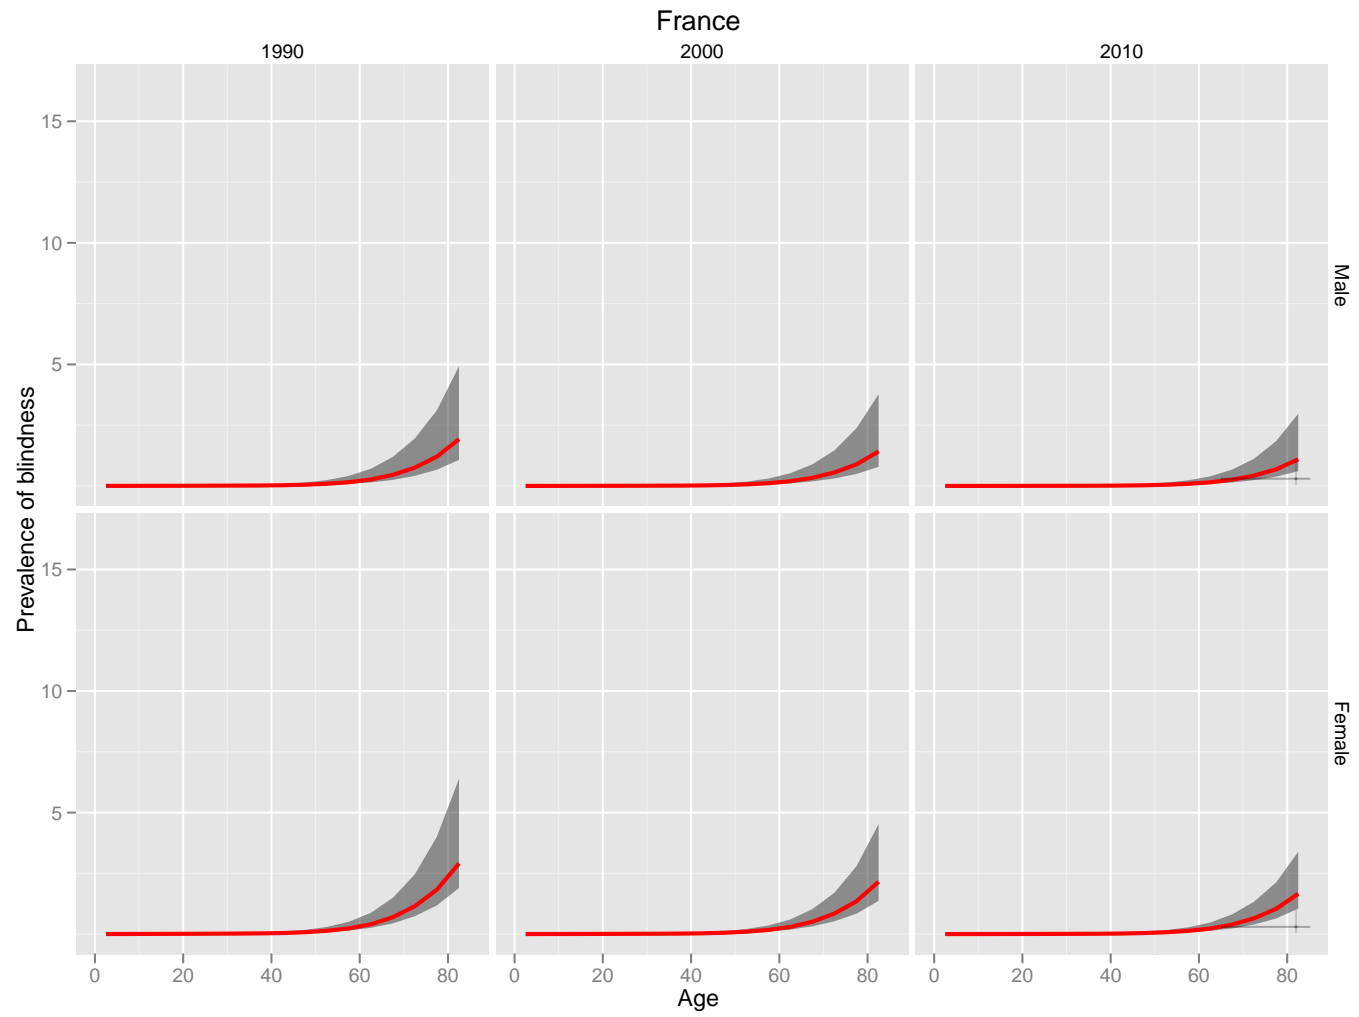

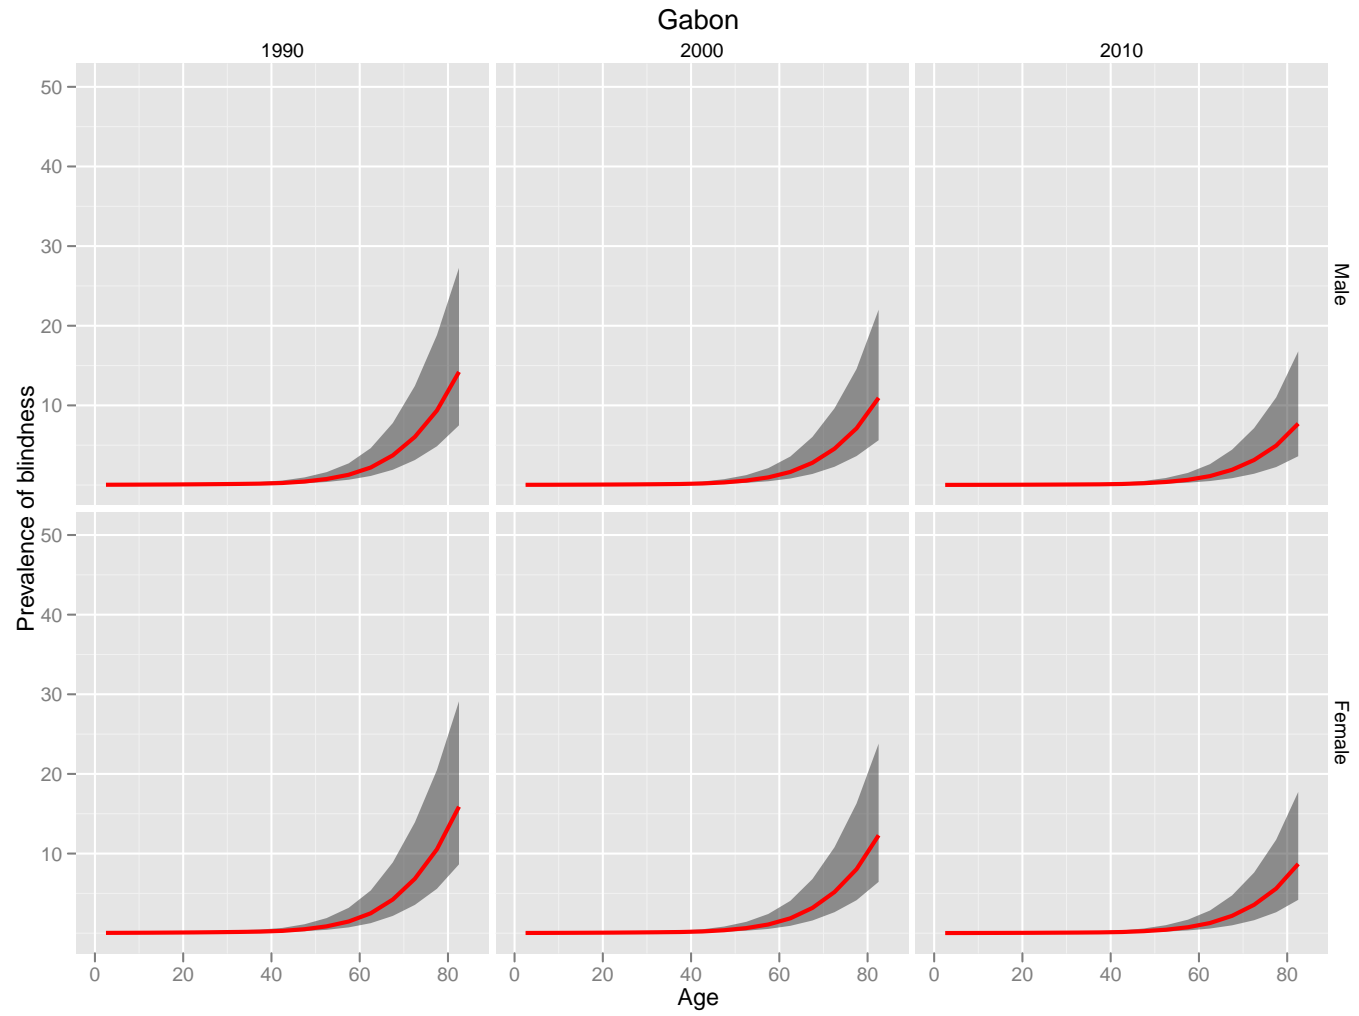

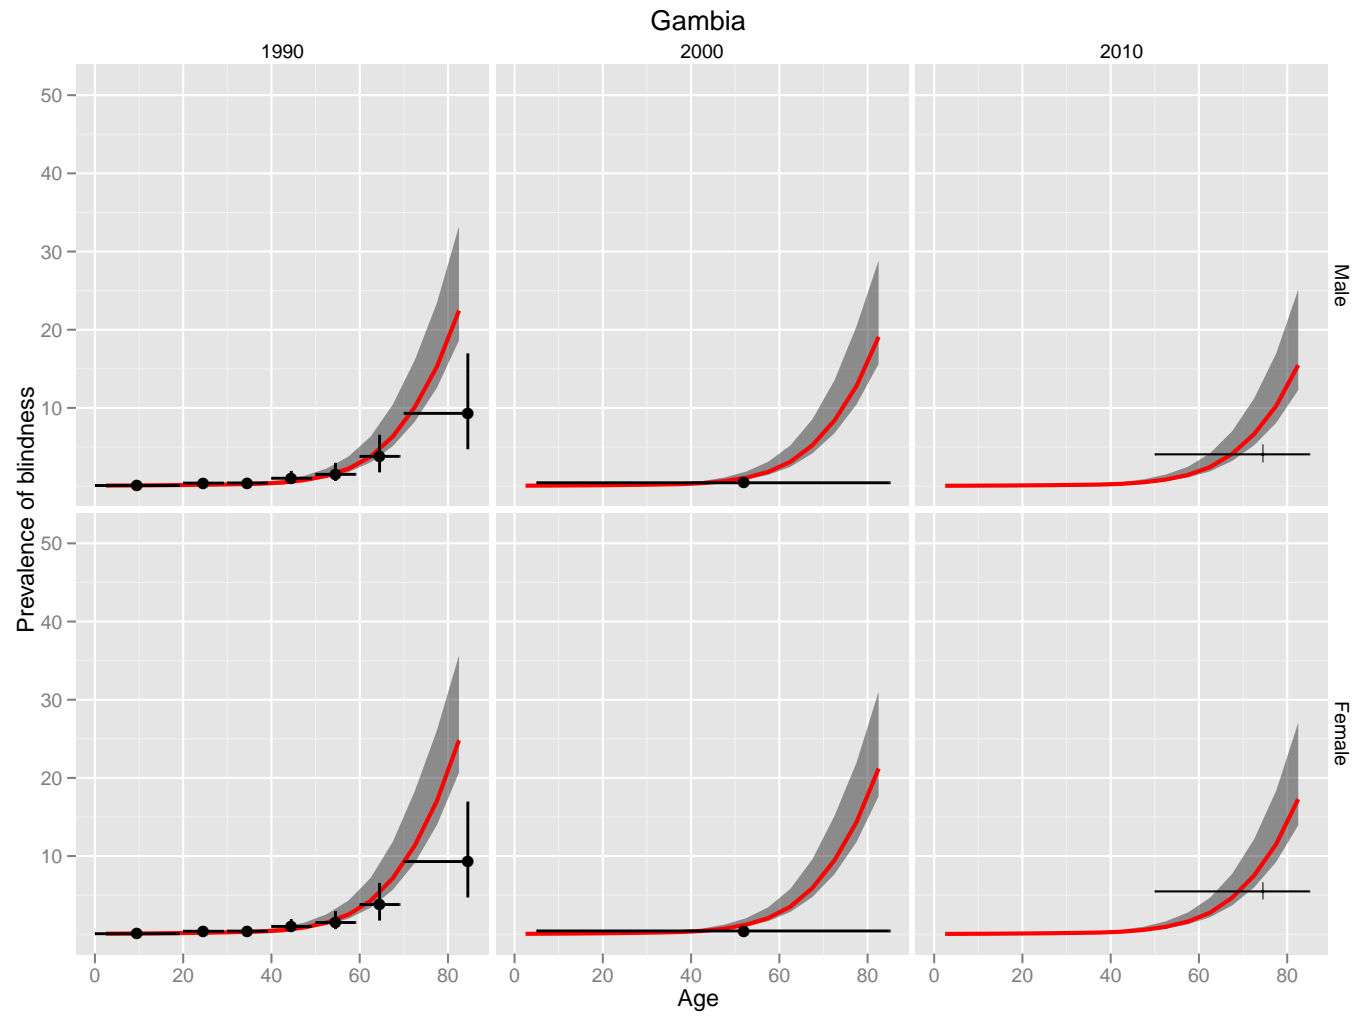

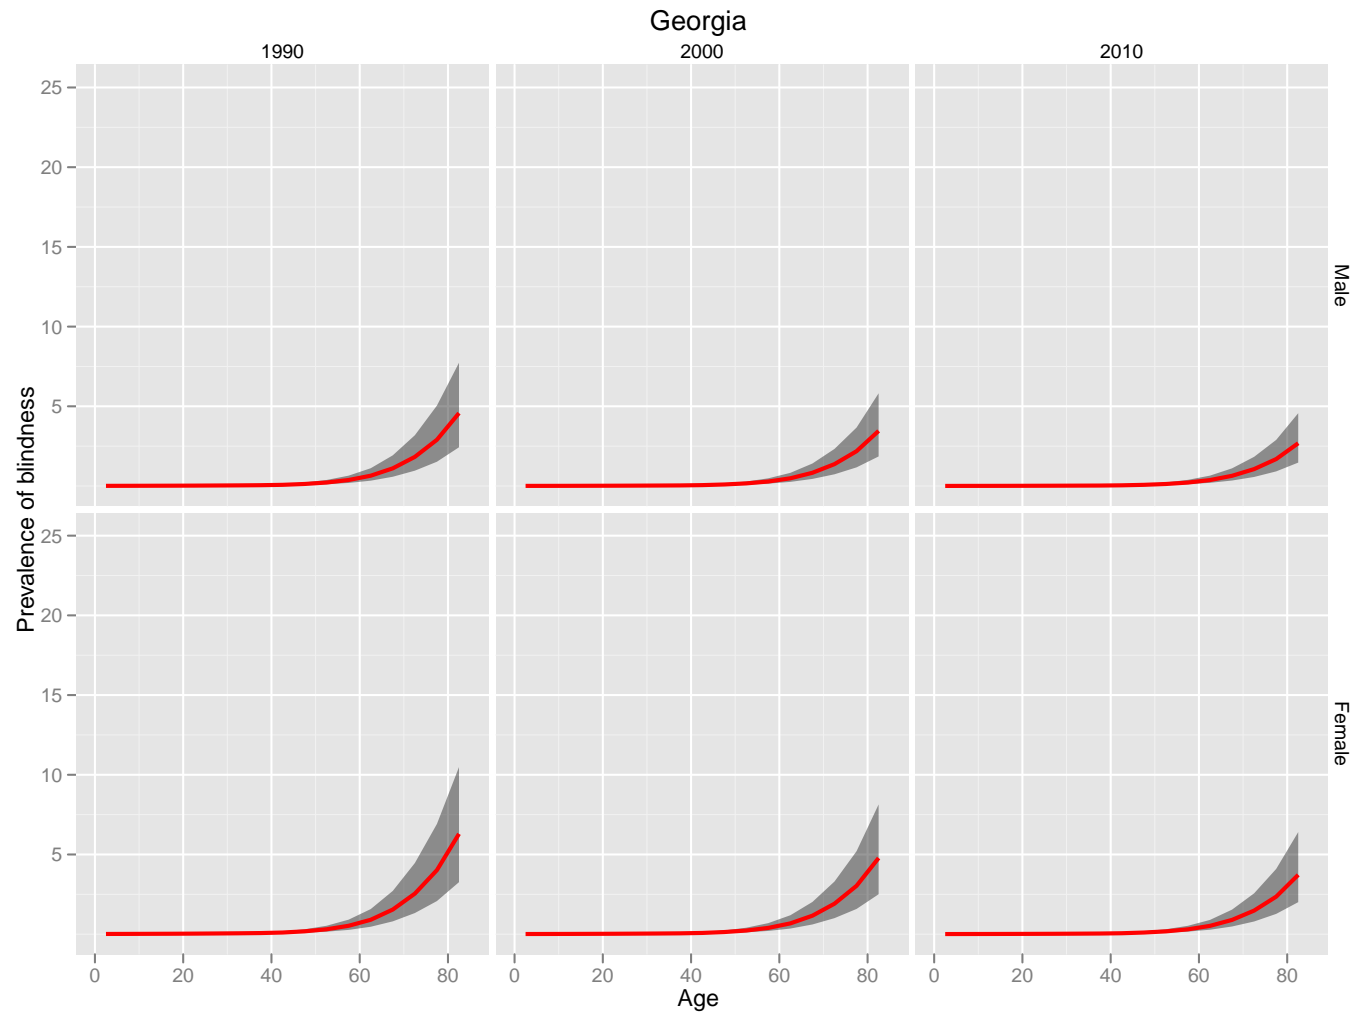

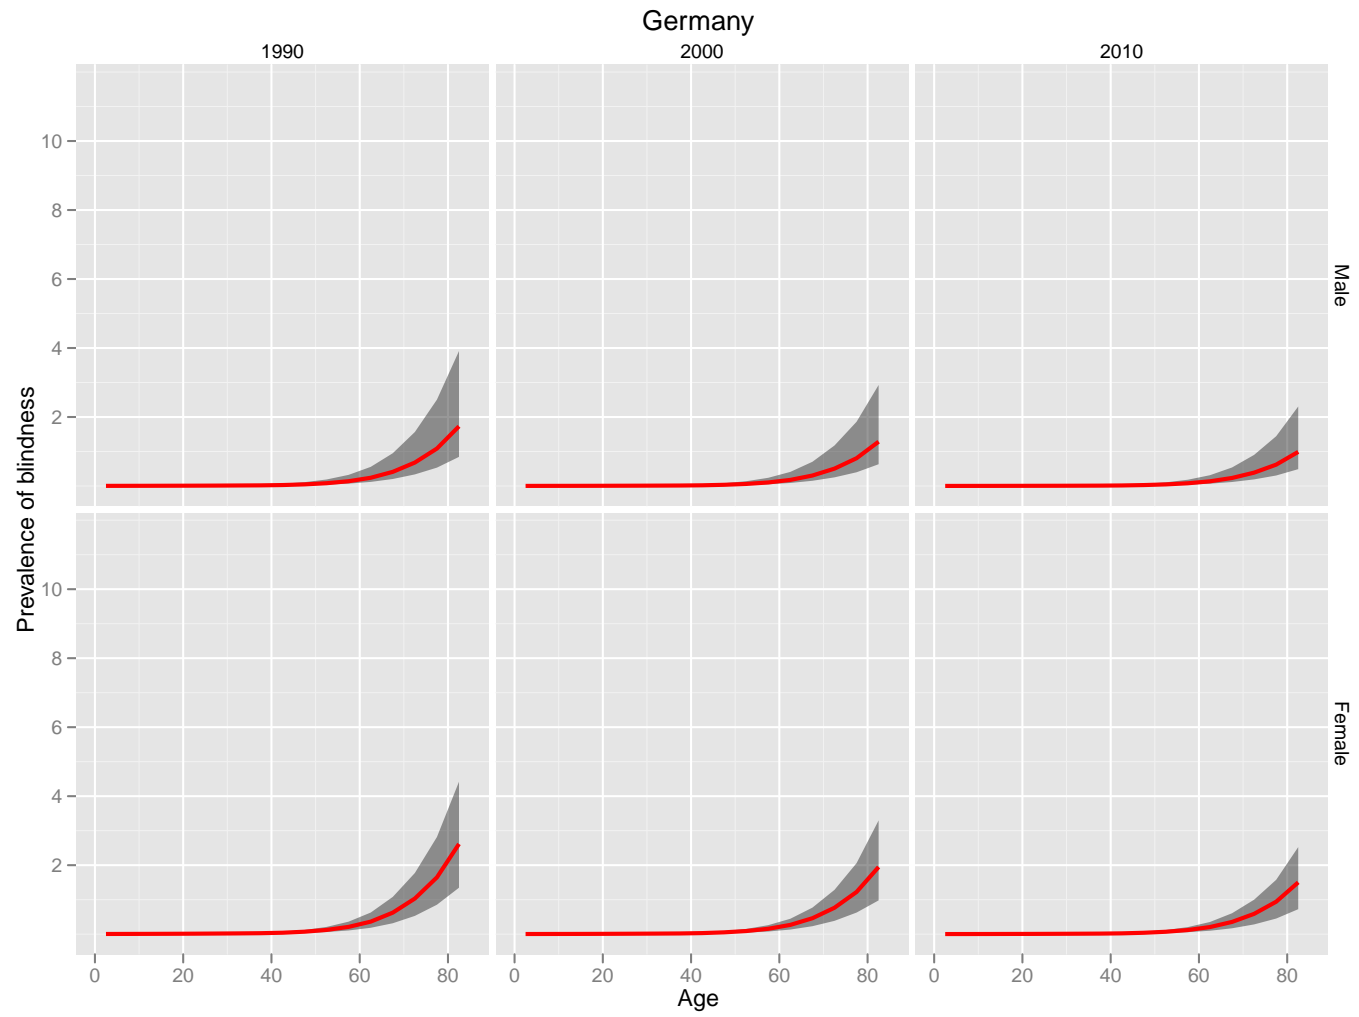

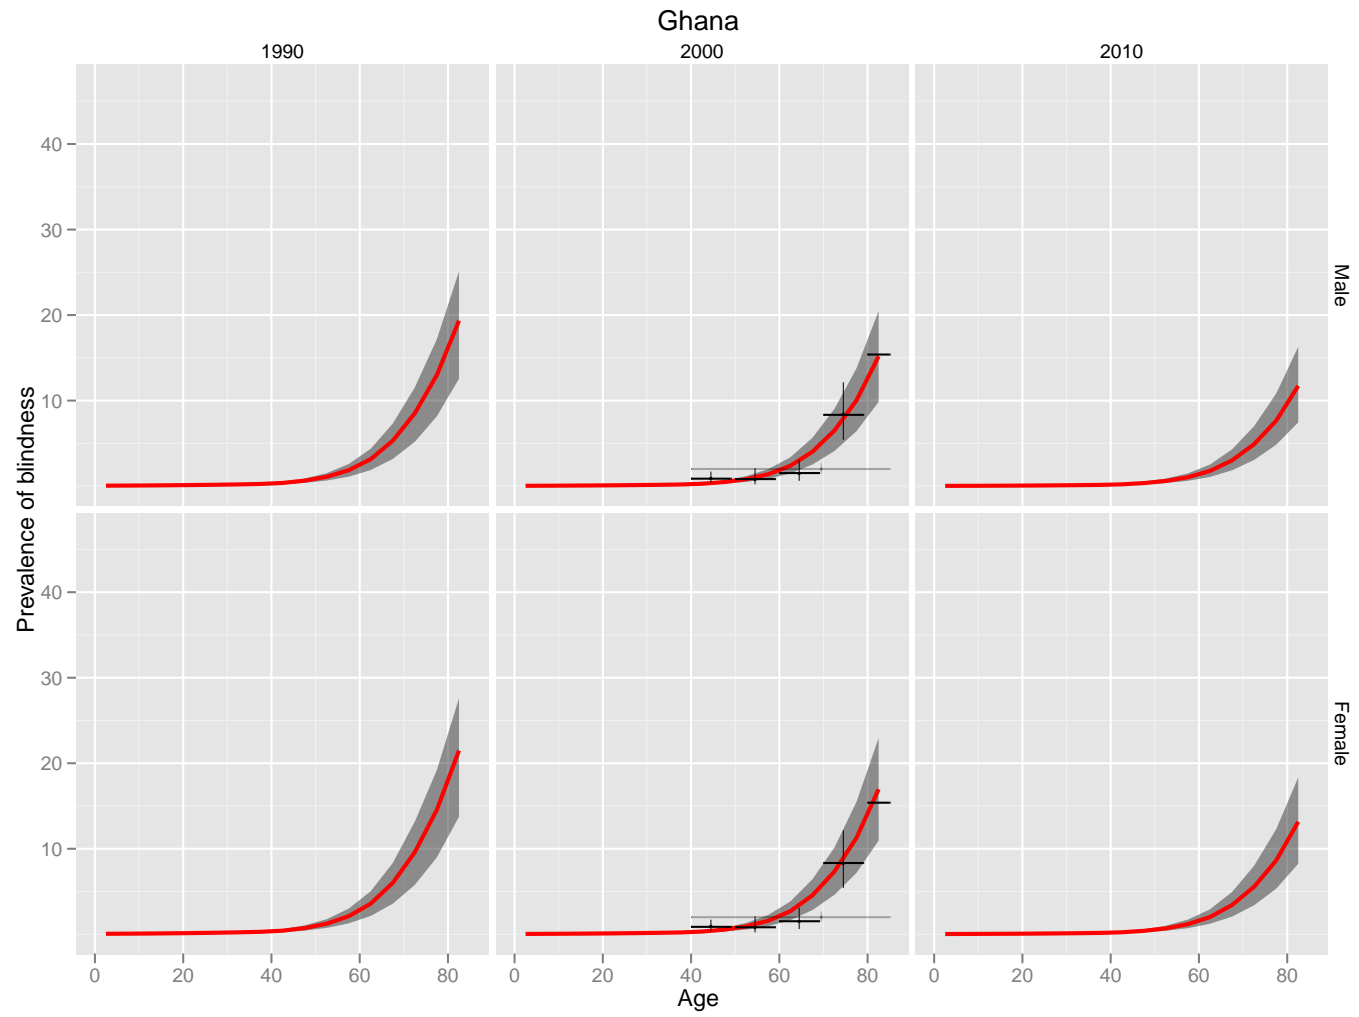

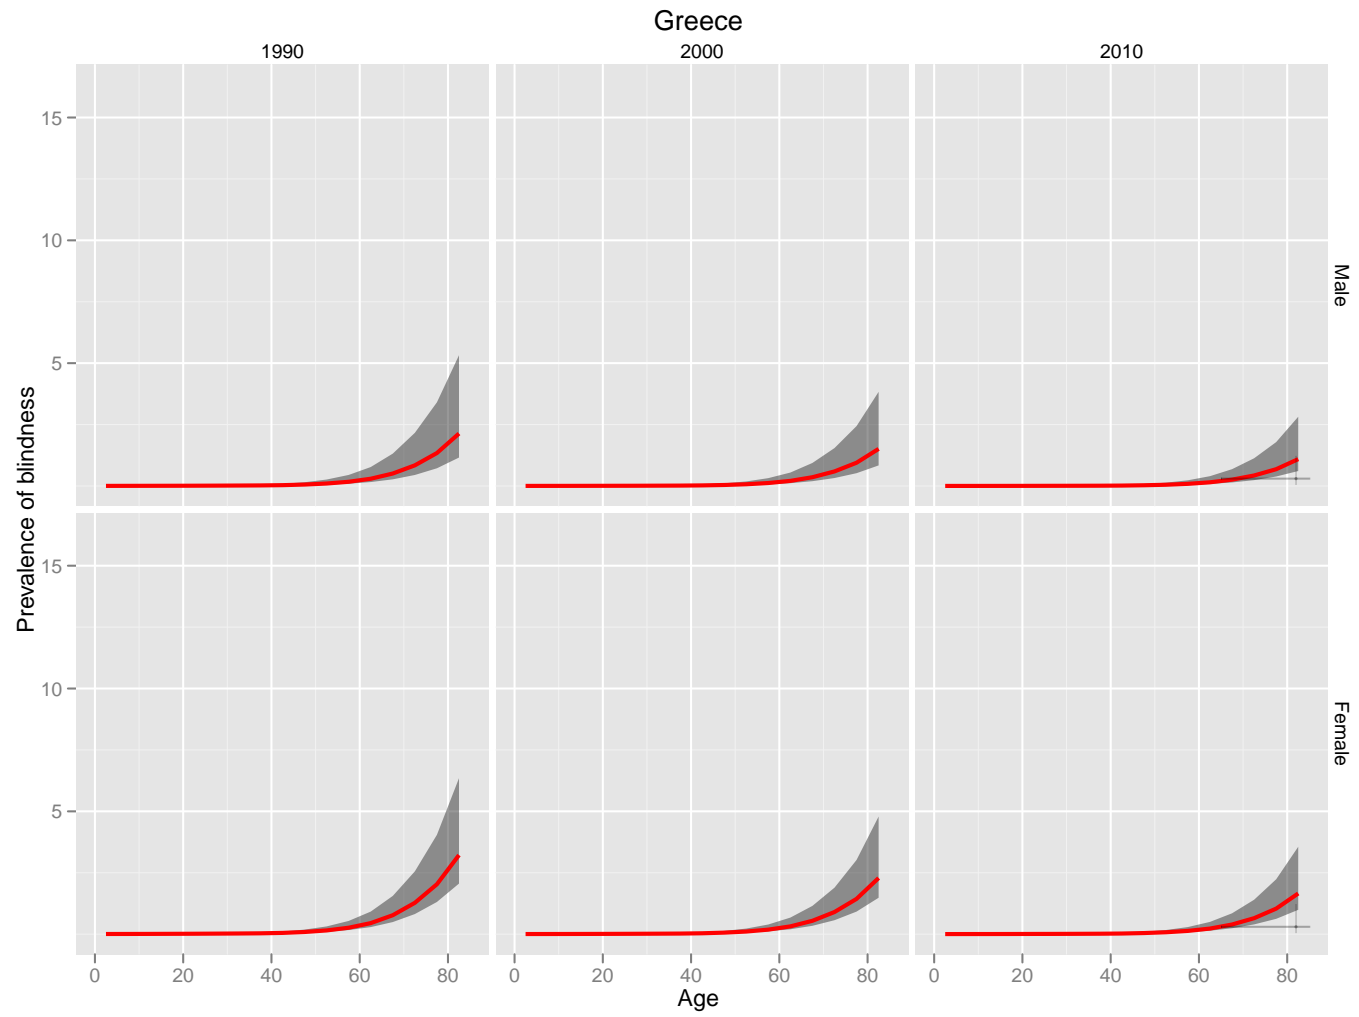



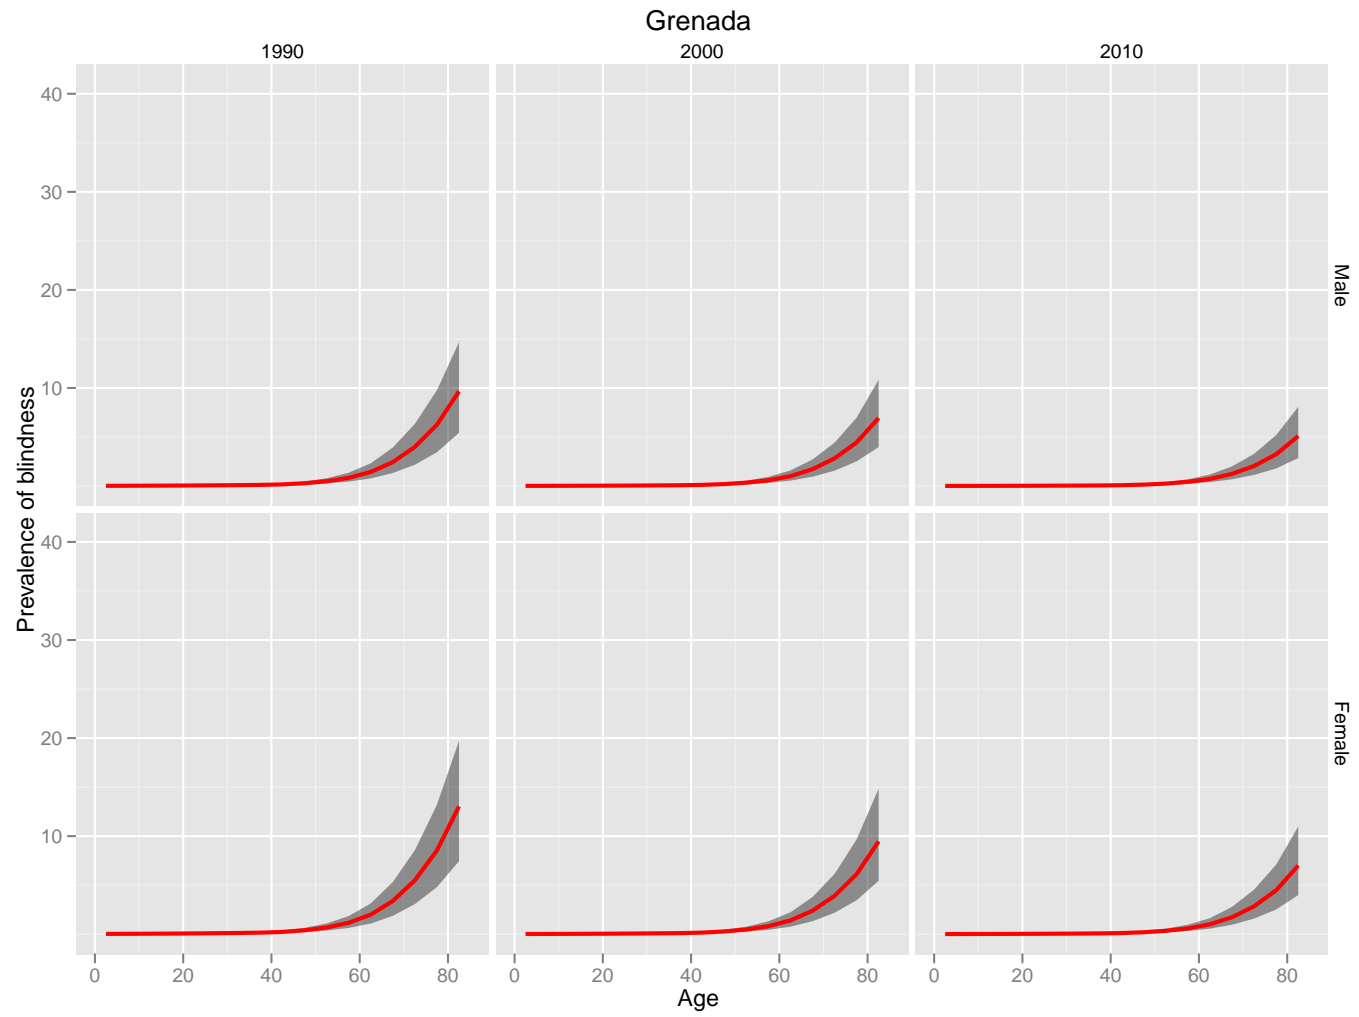

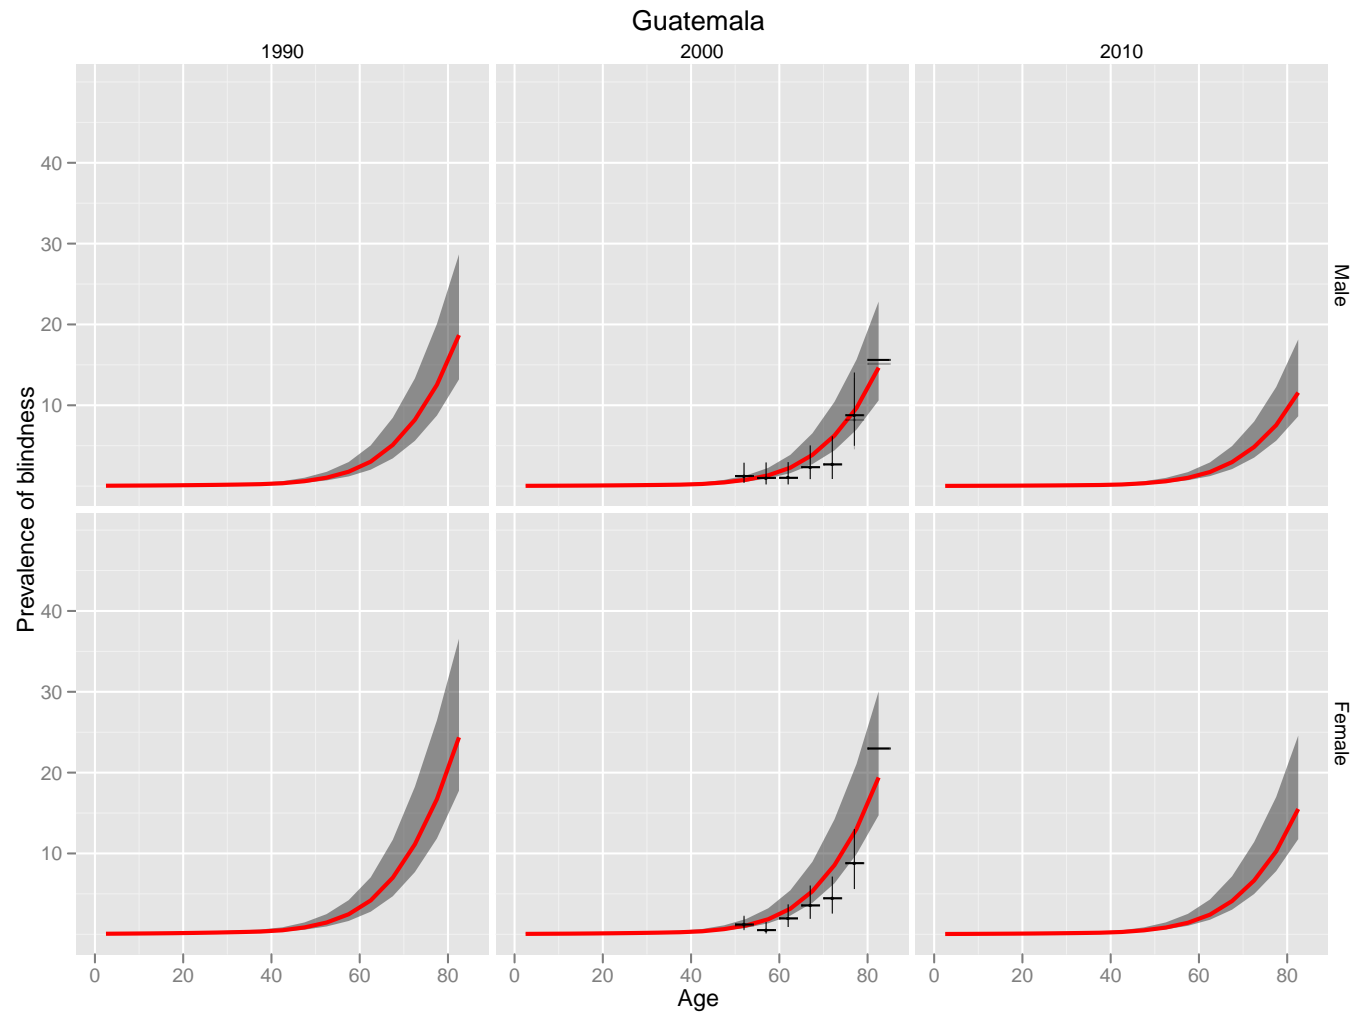

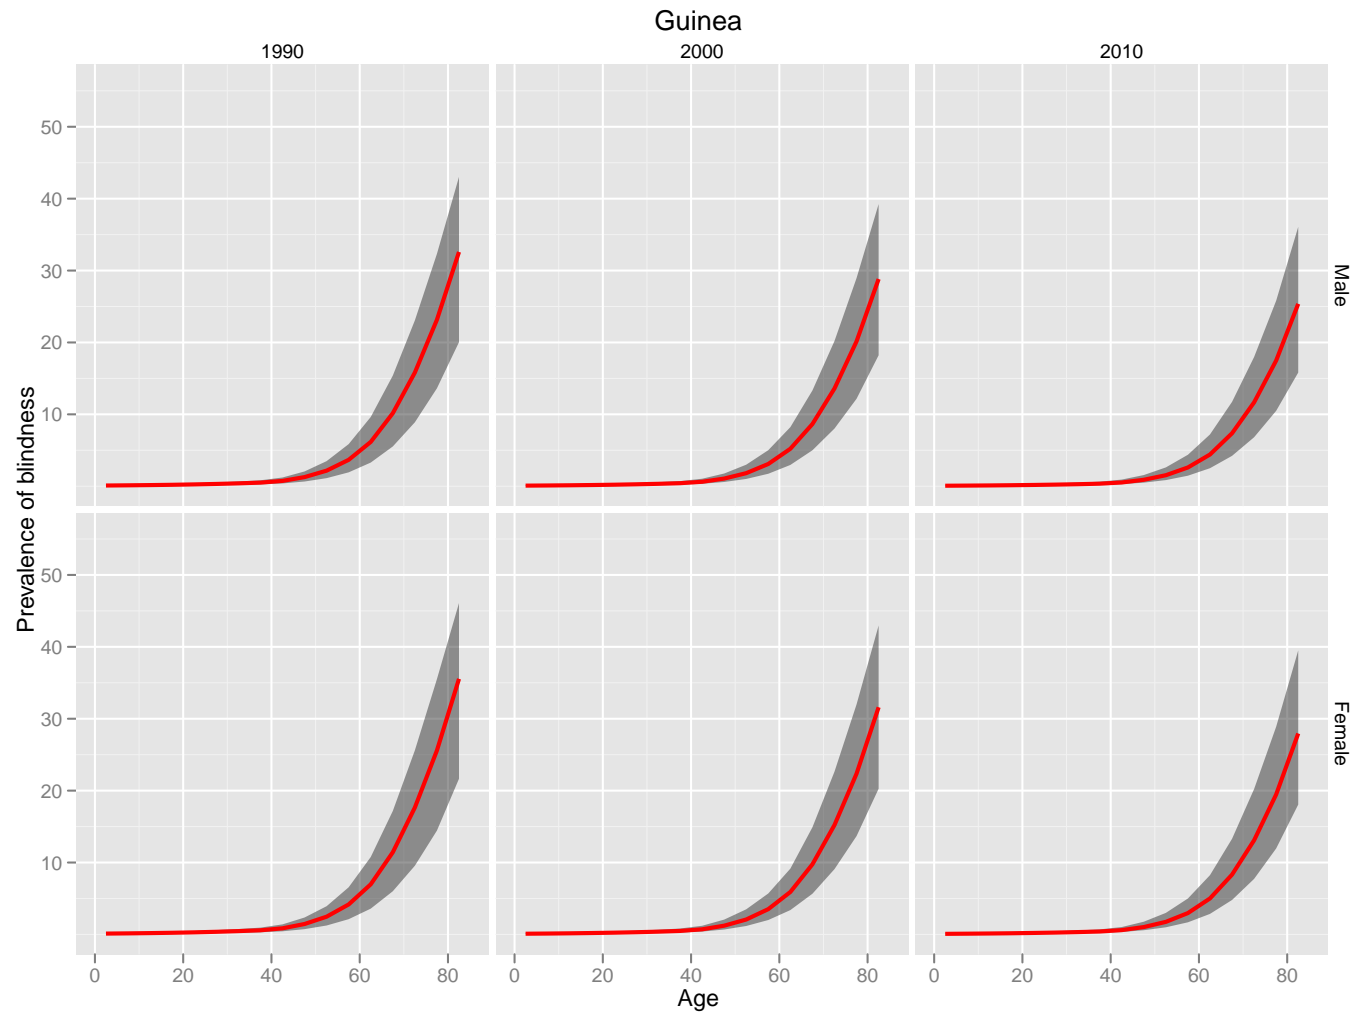

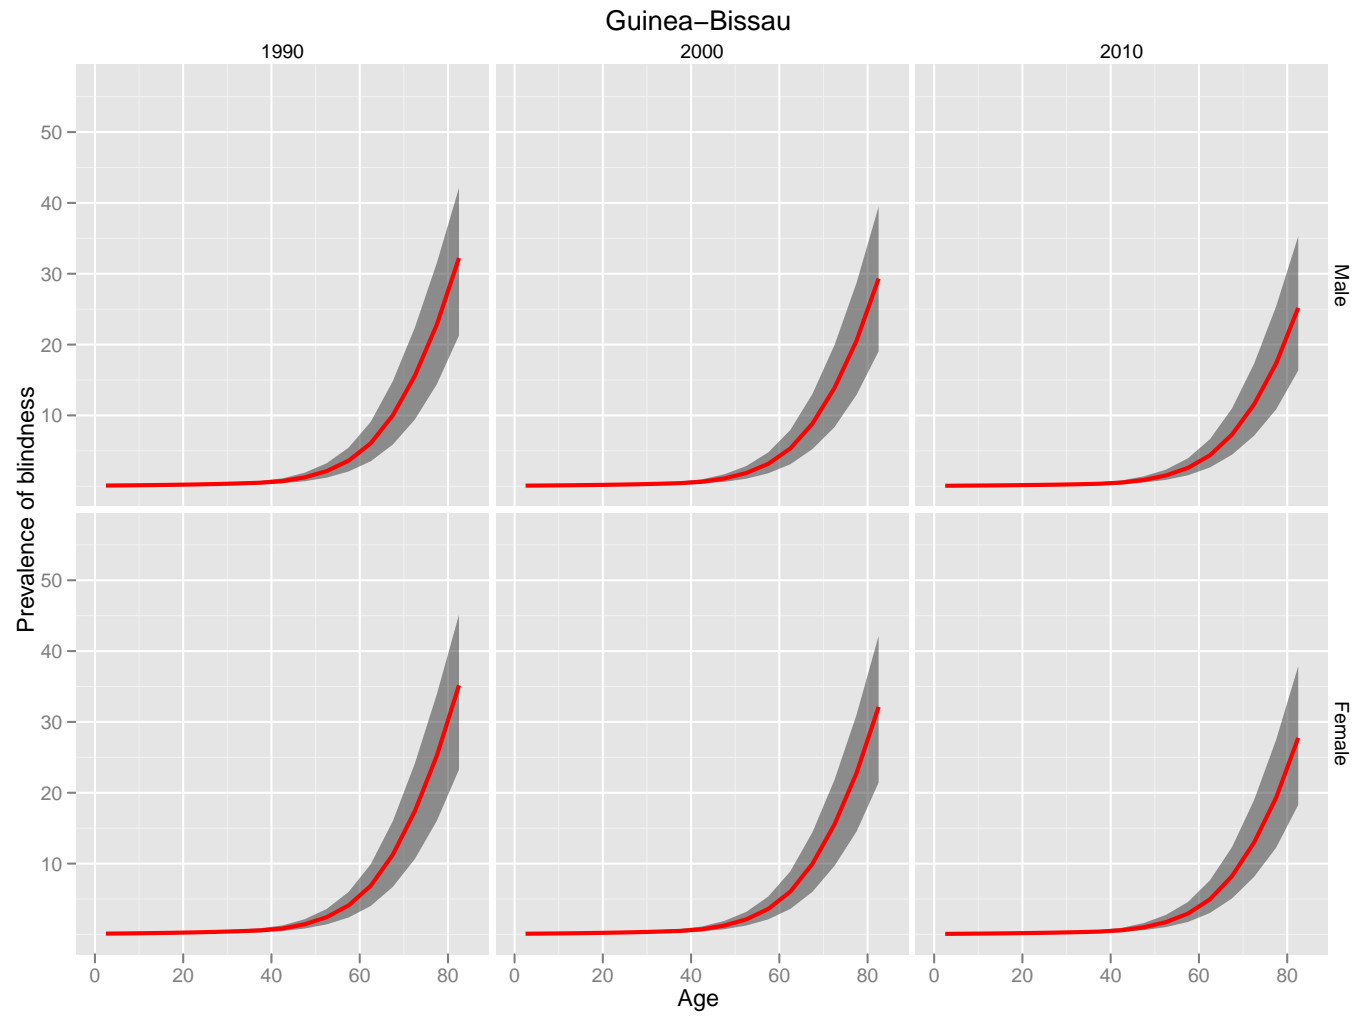

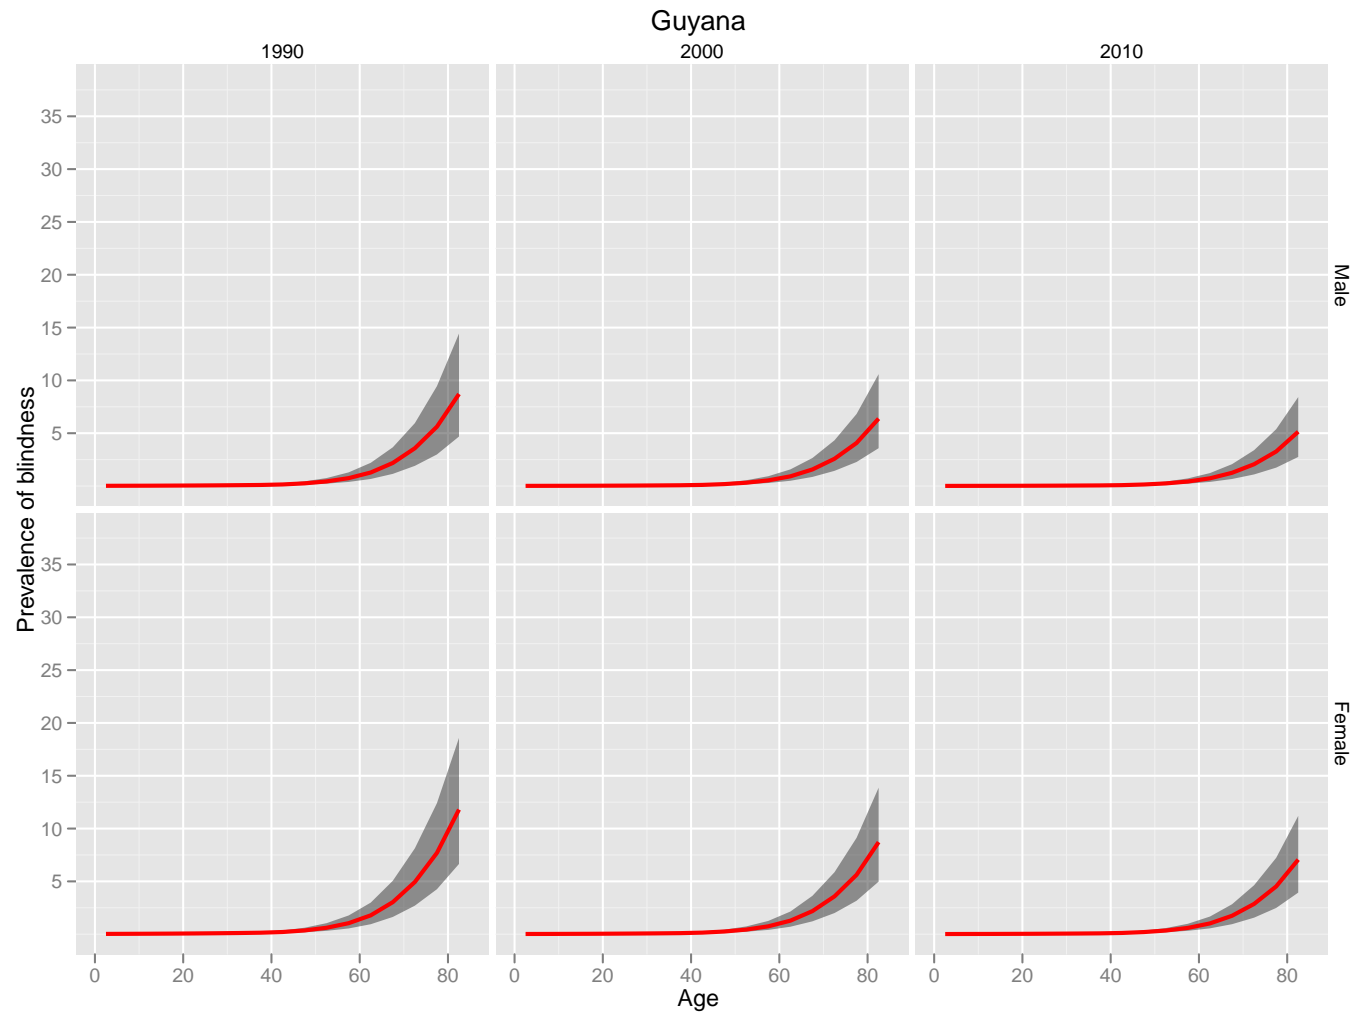

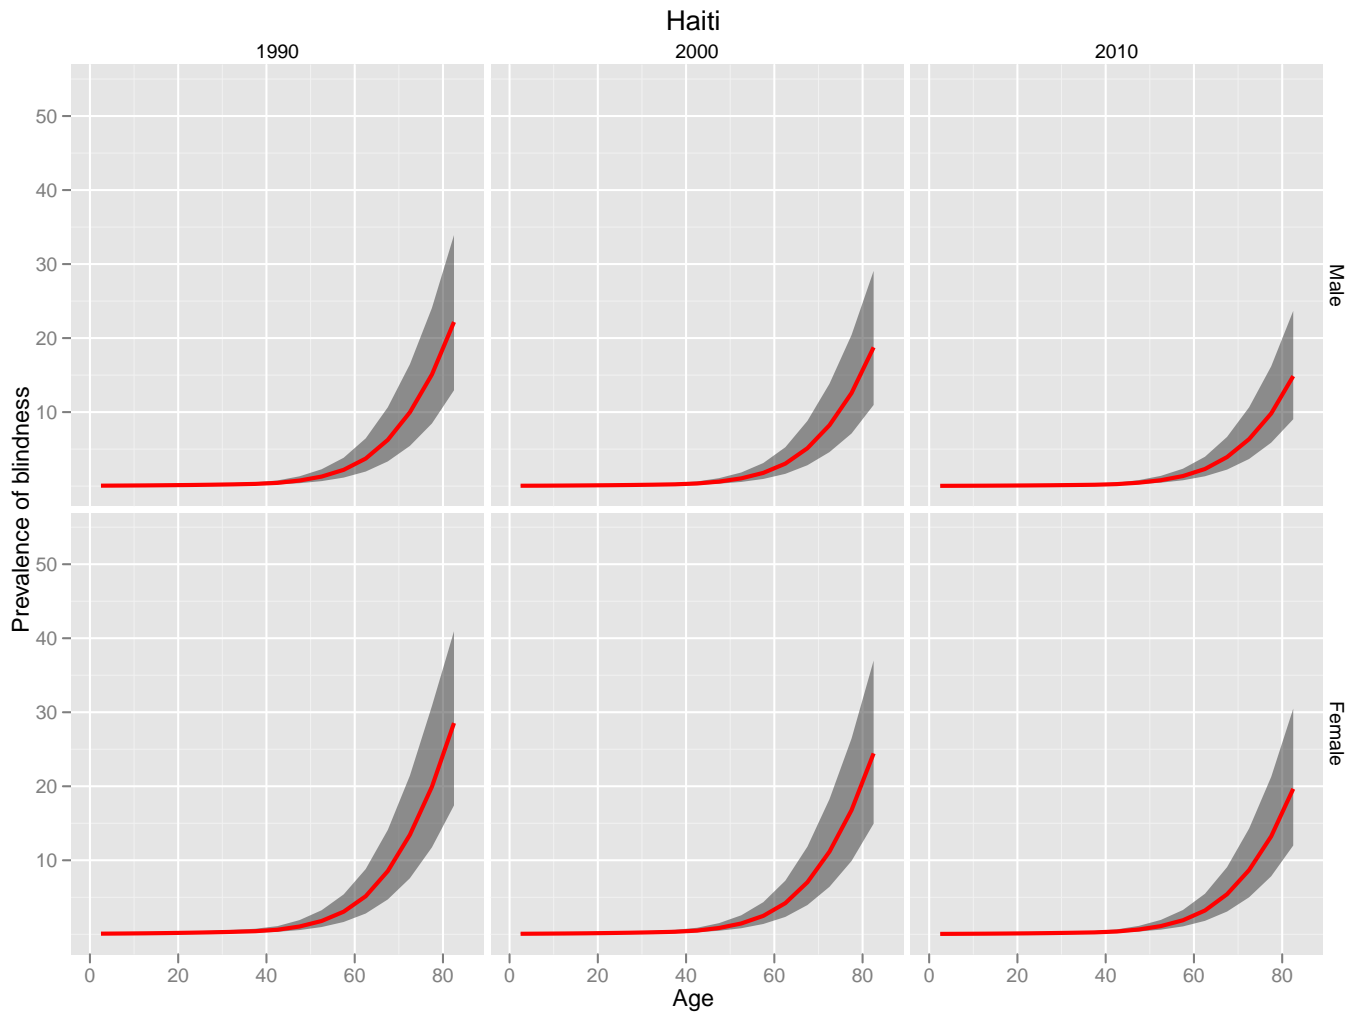

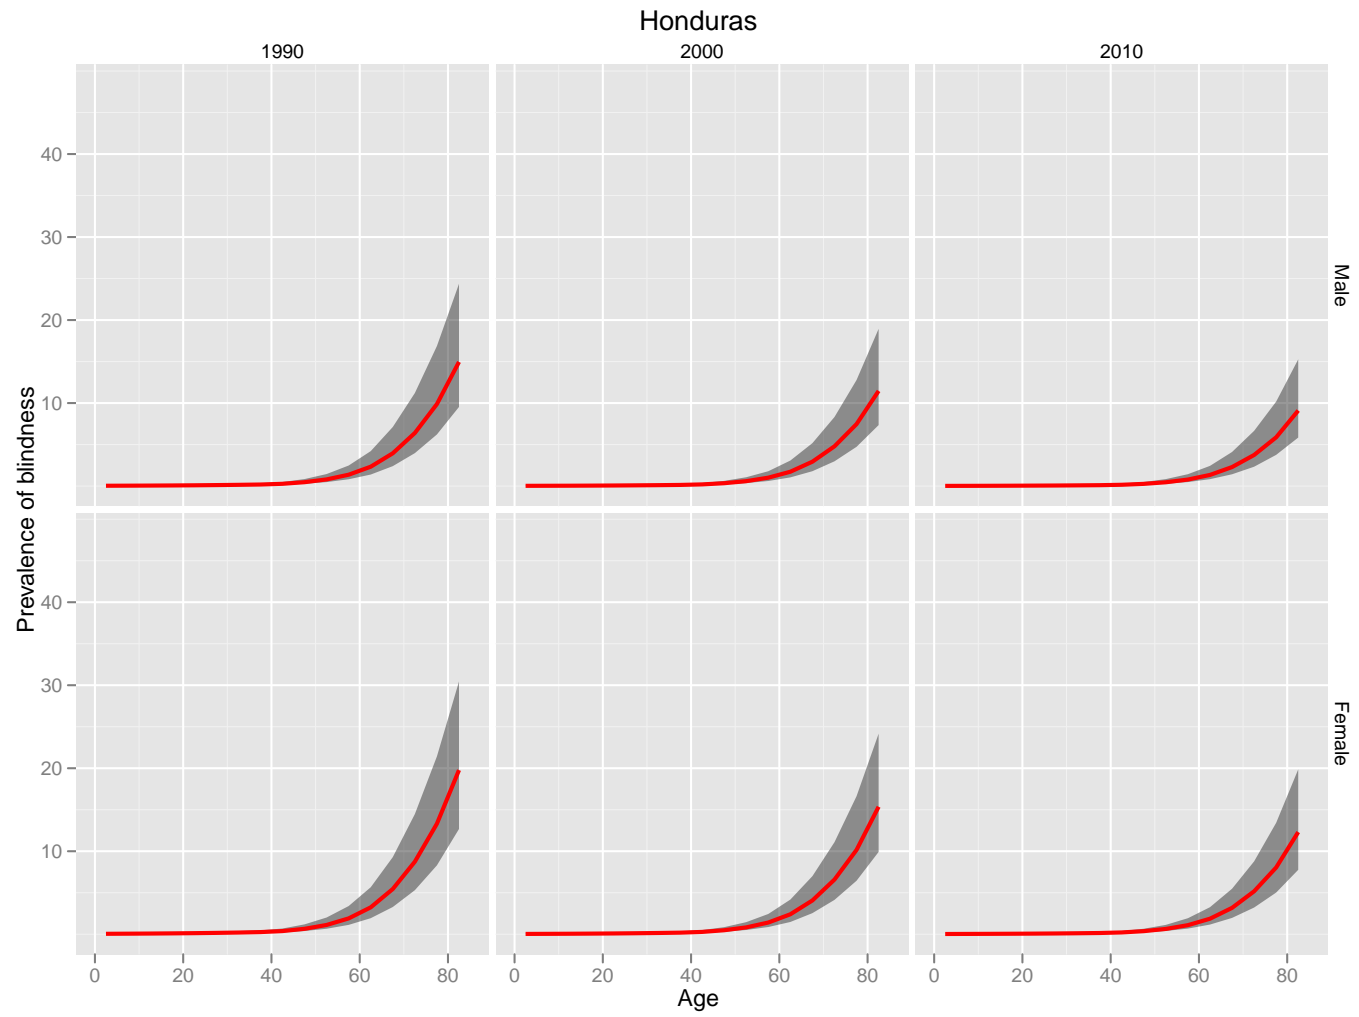

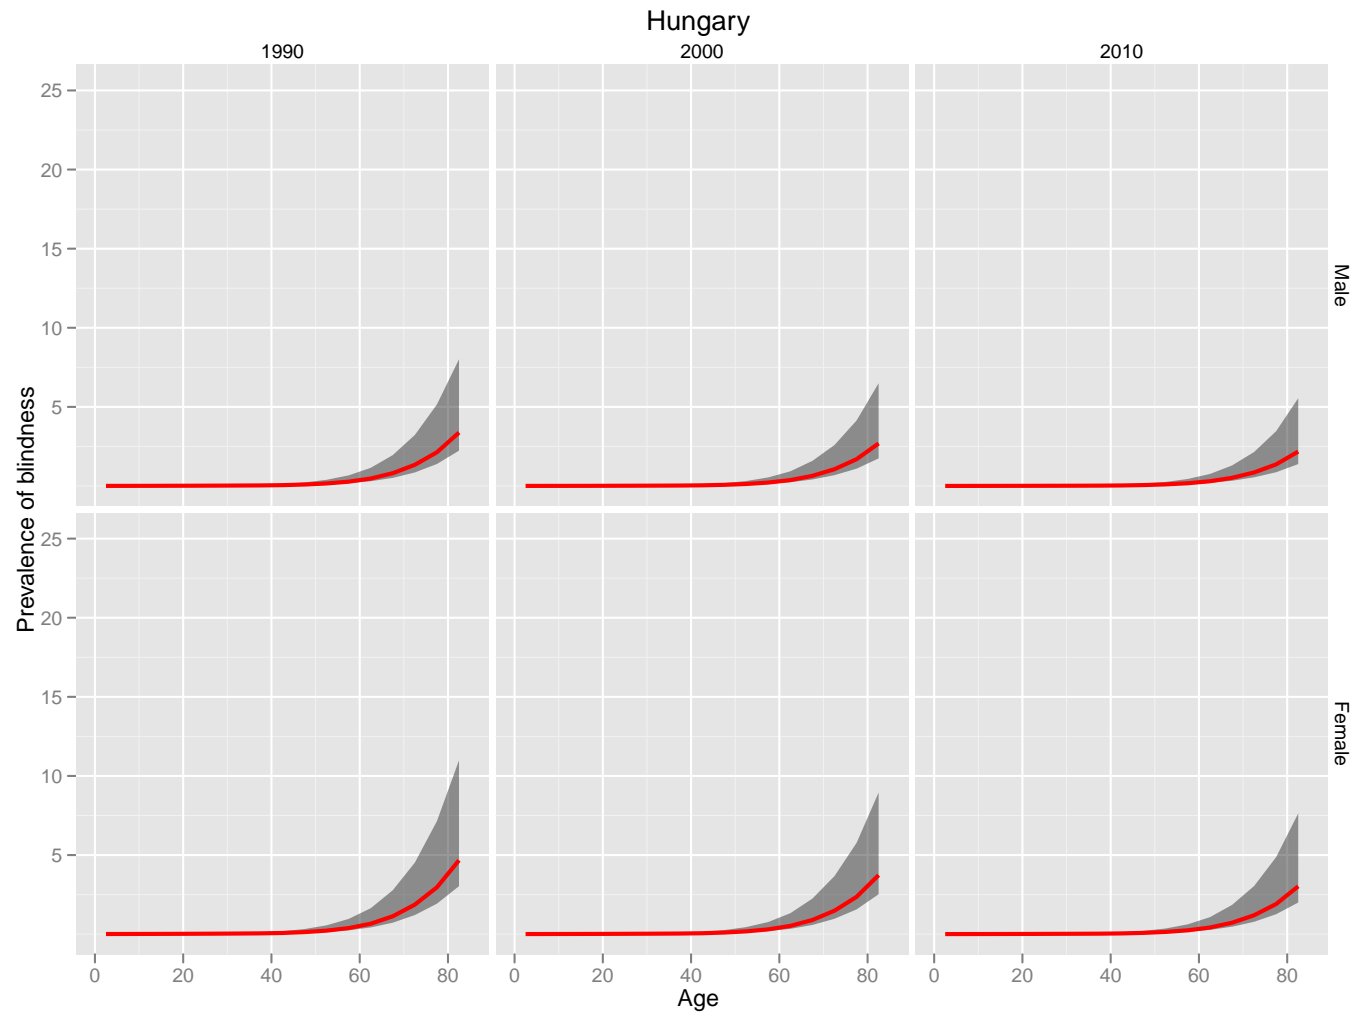



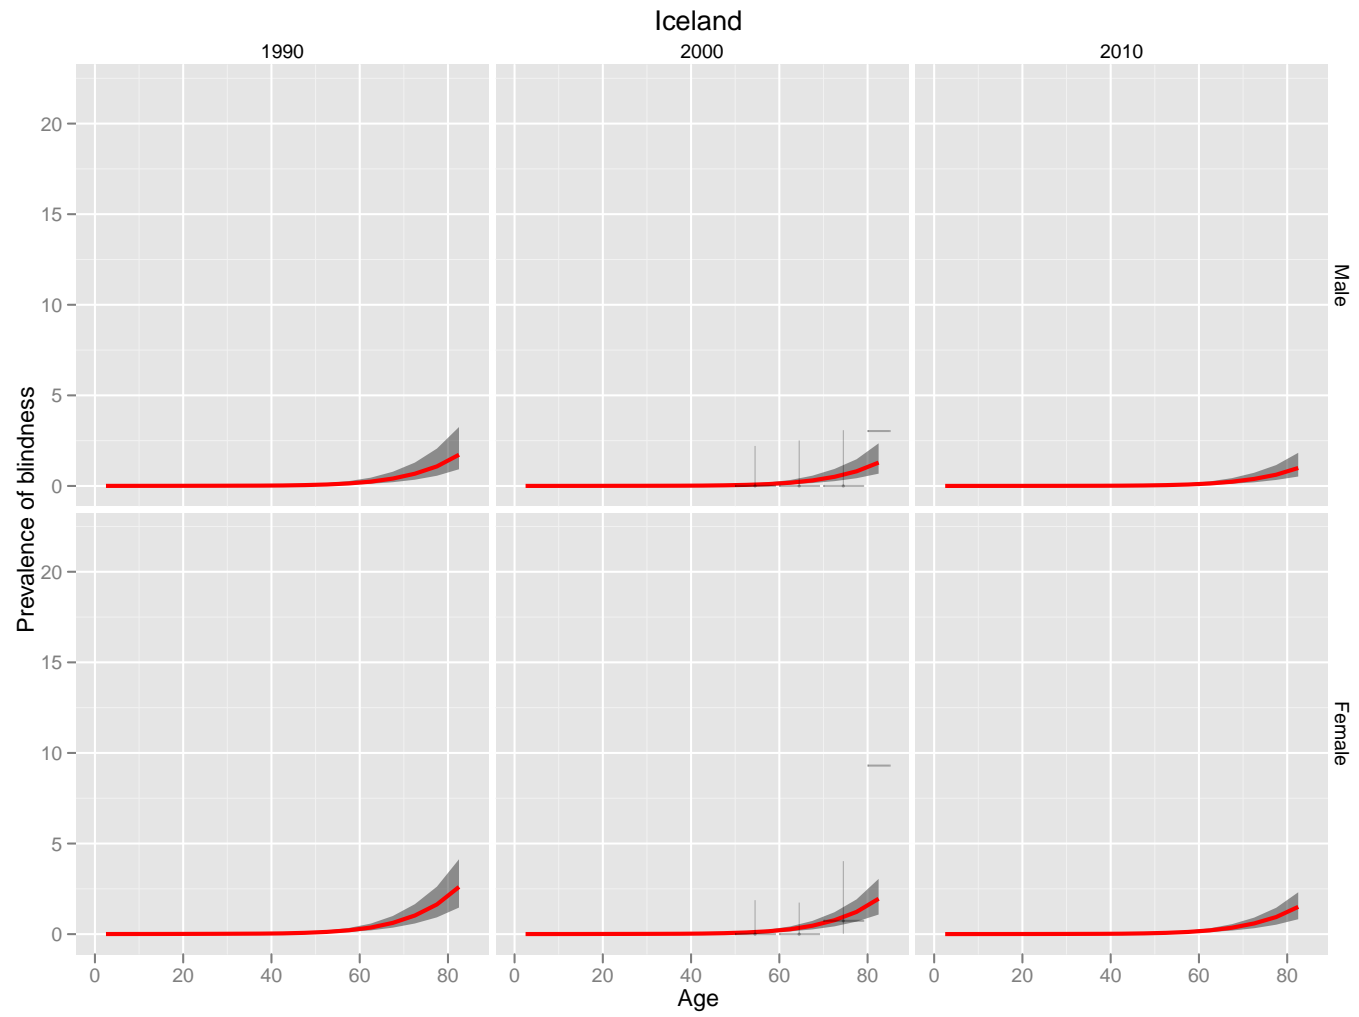

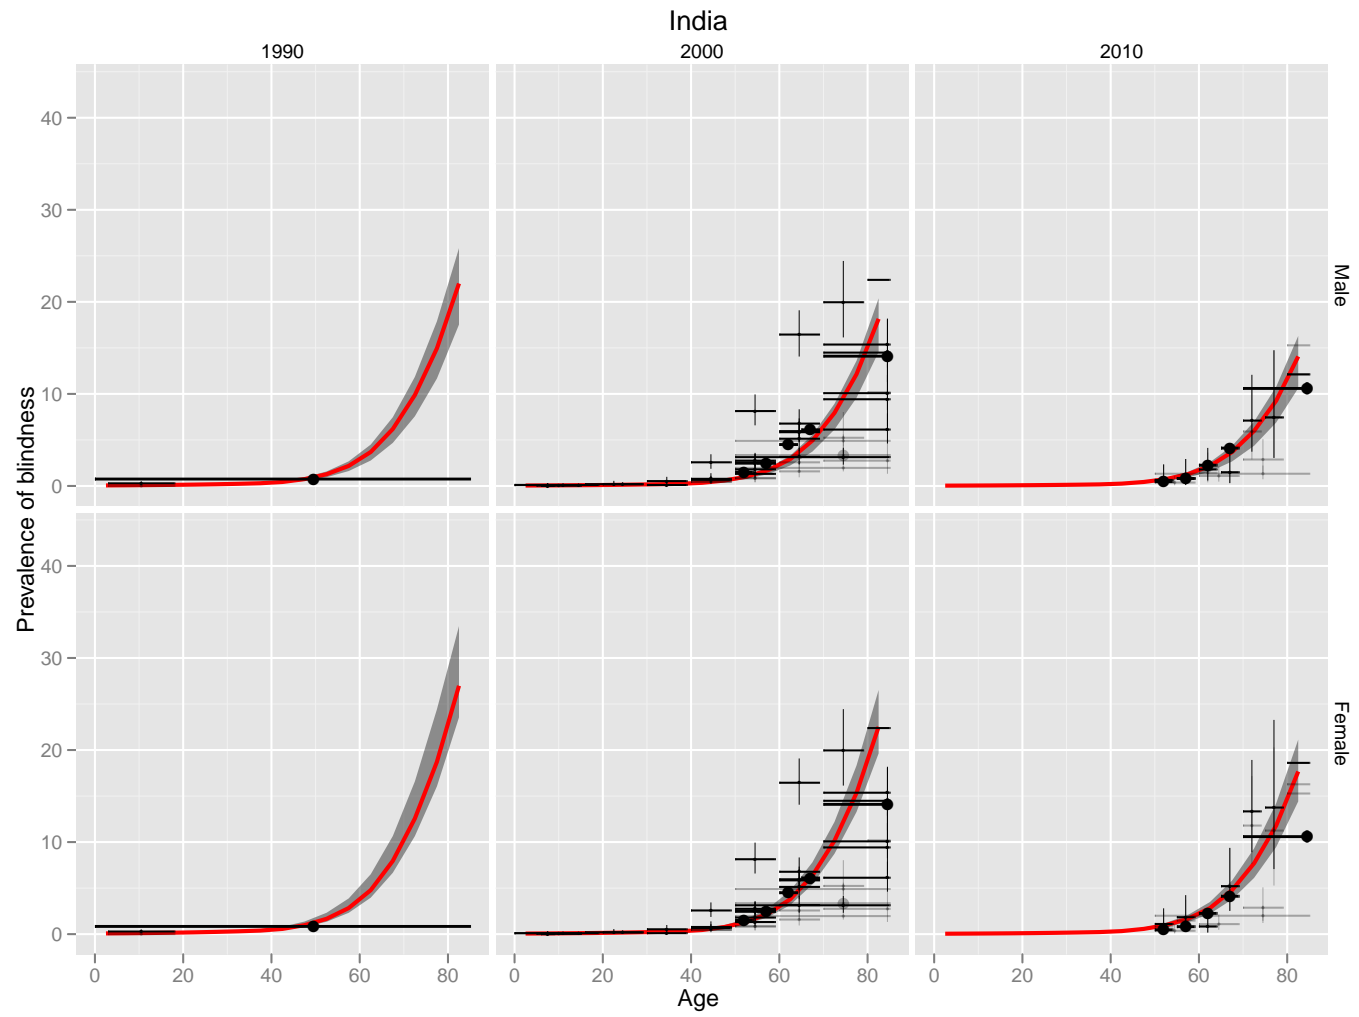

Indonesia

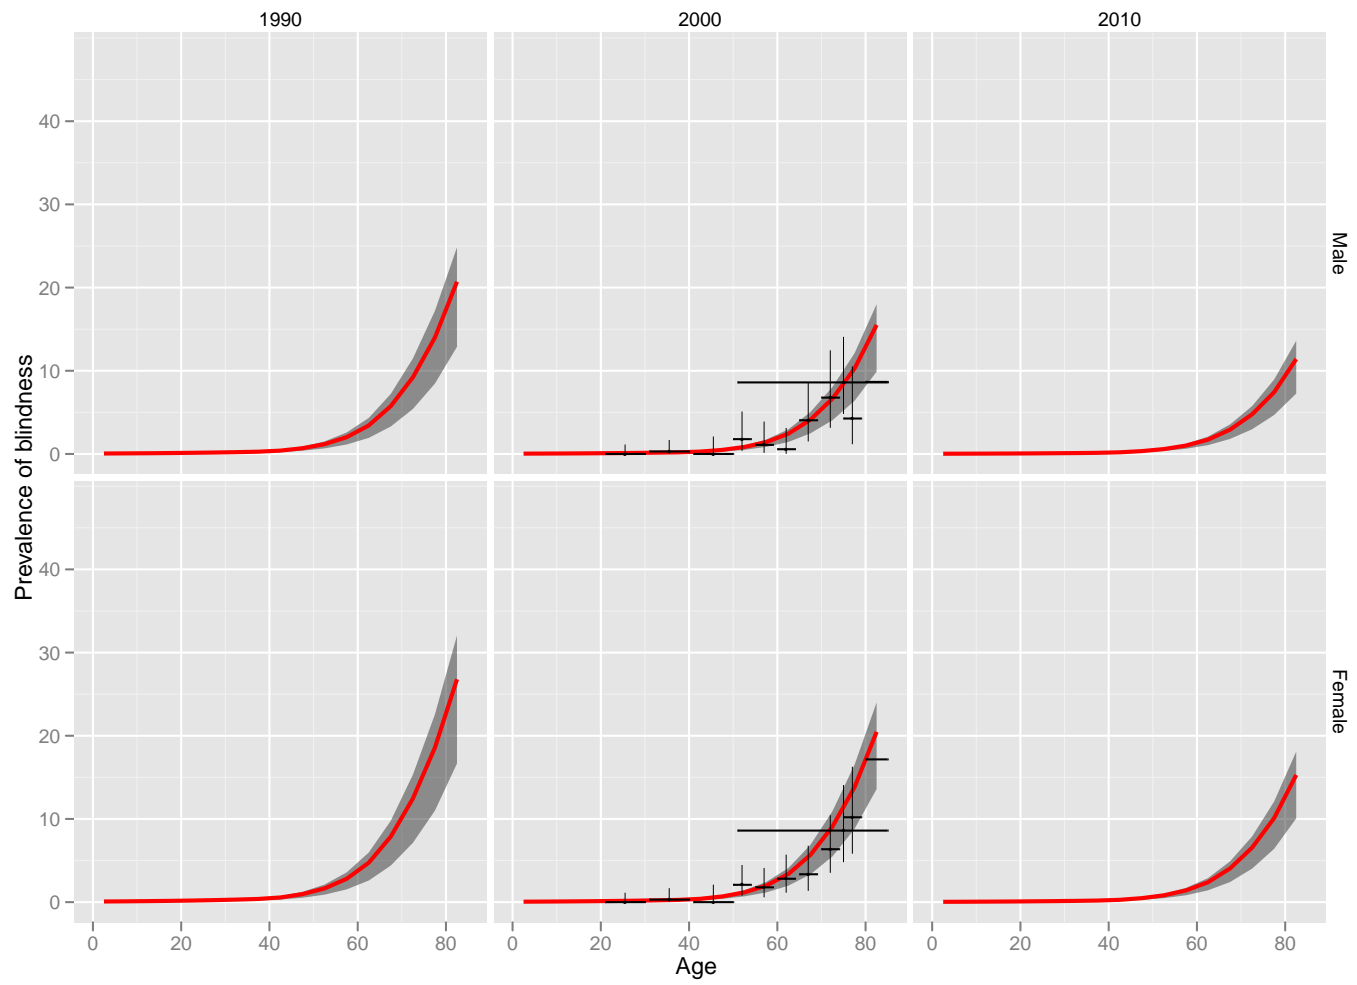

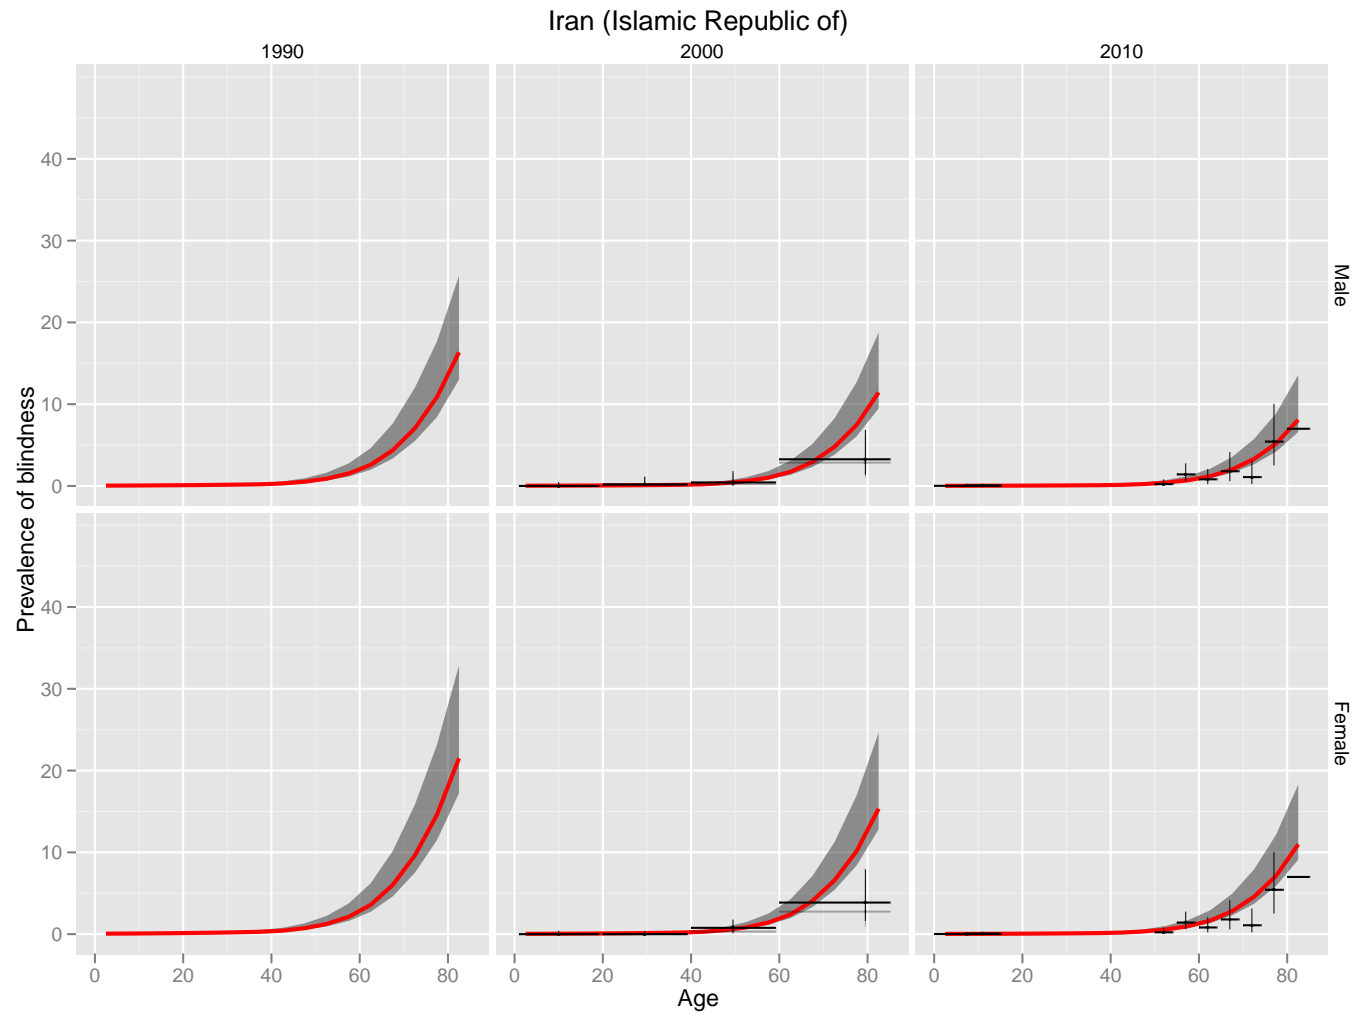

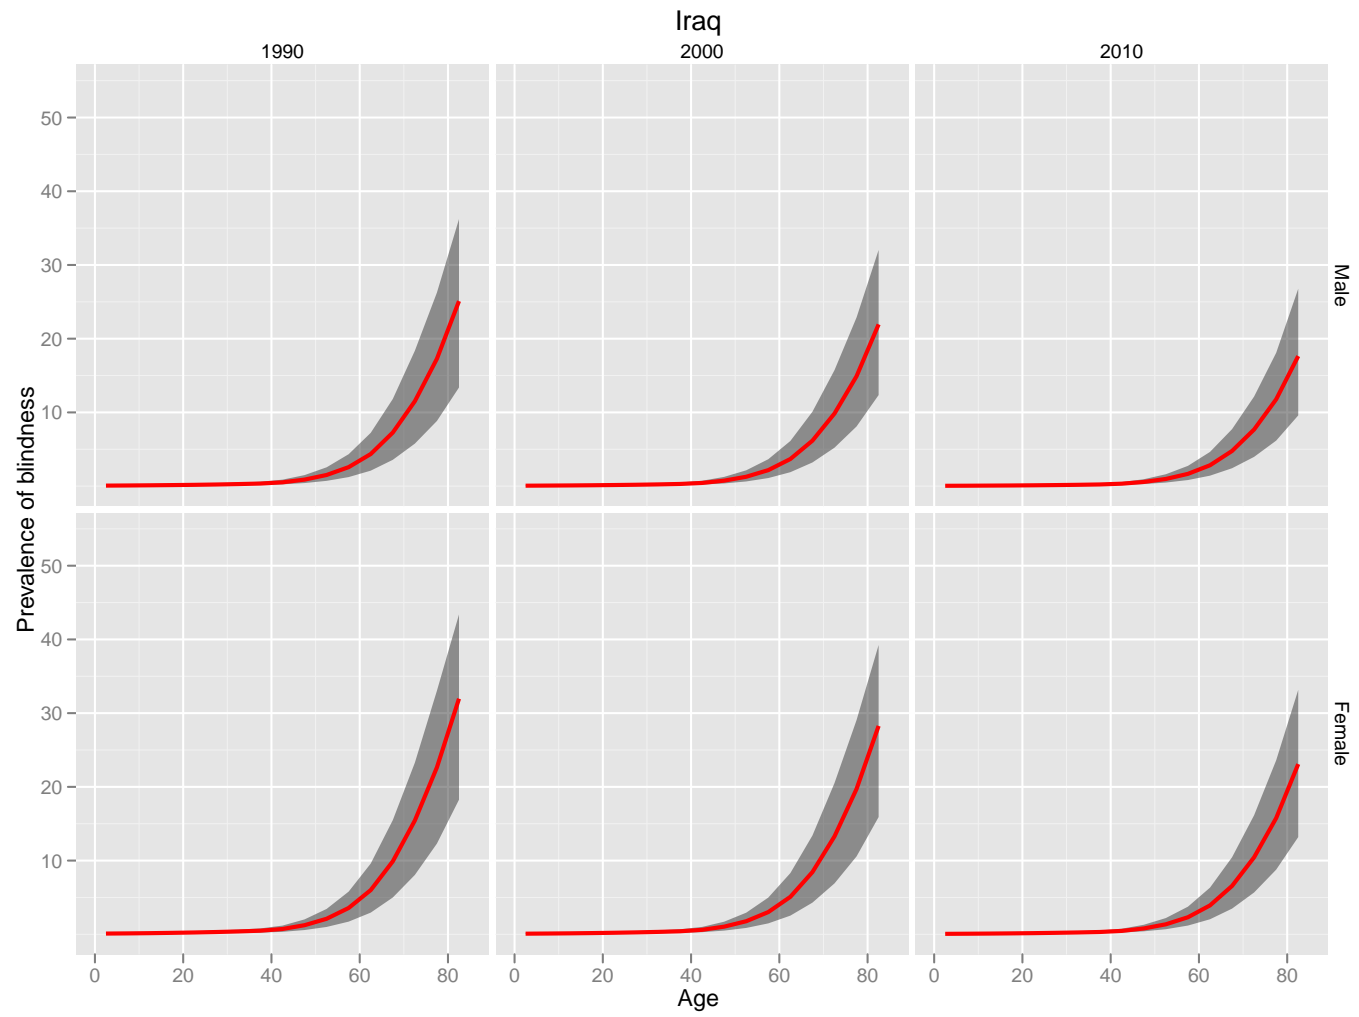

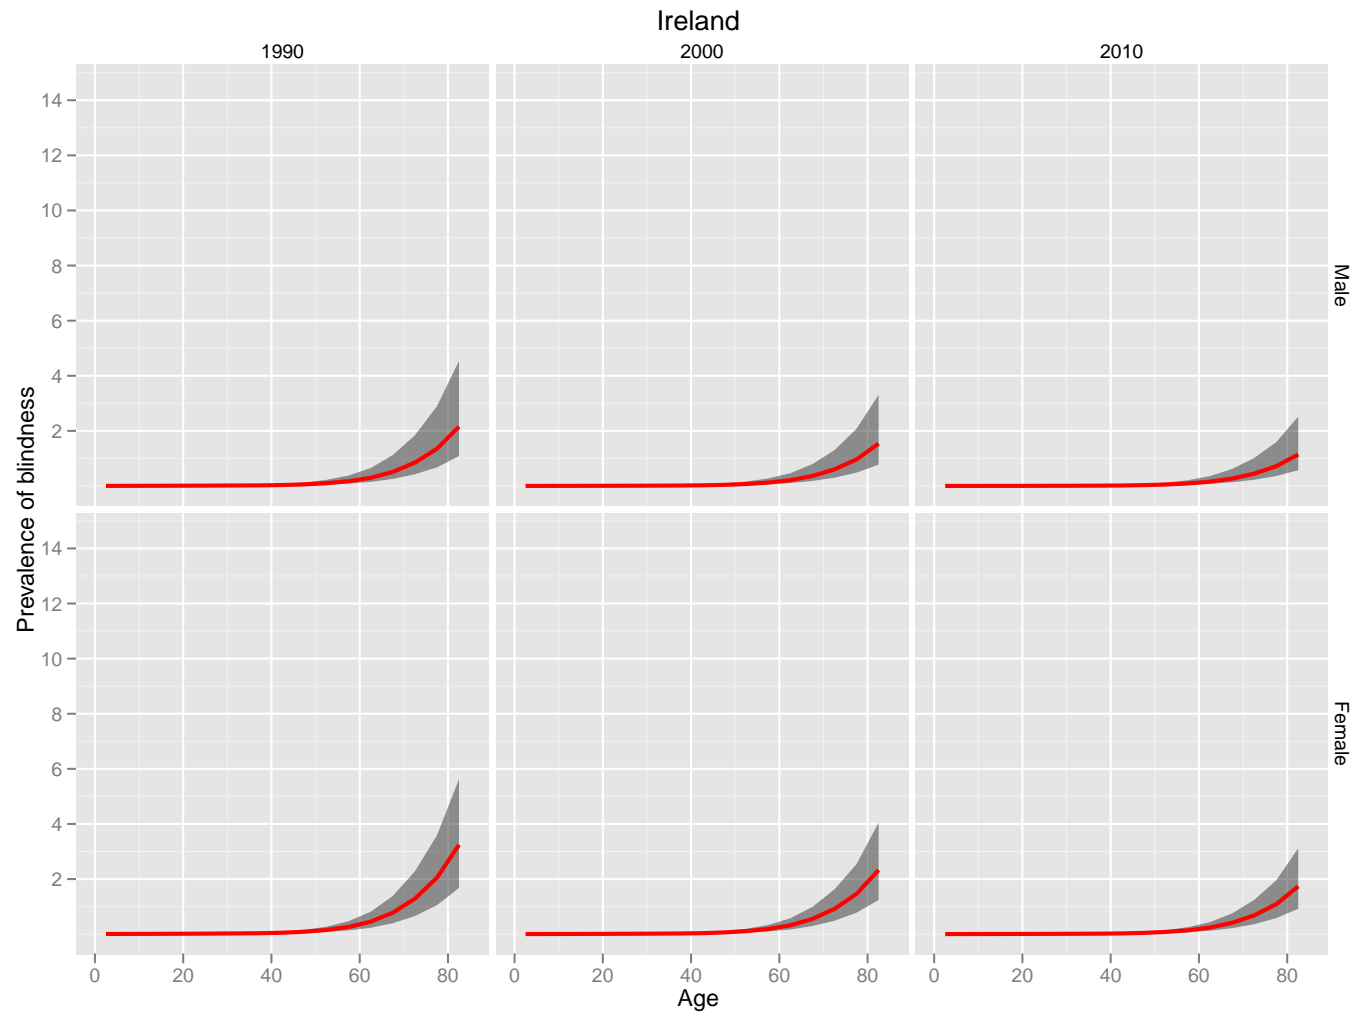

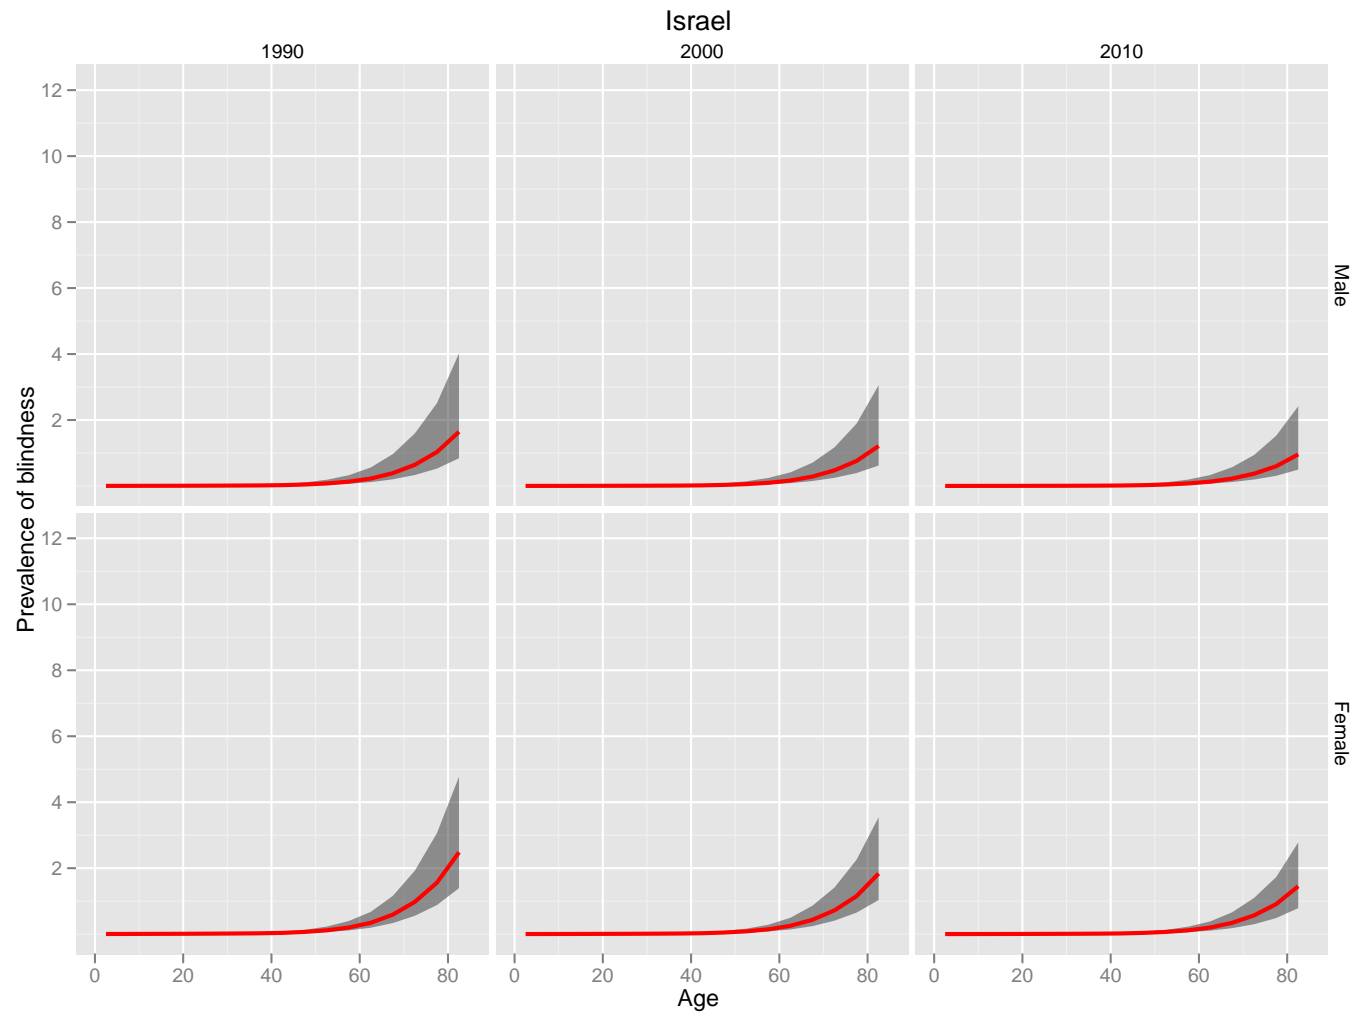

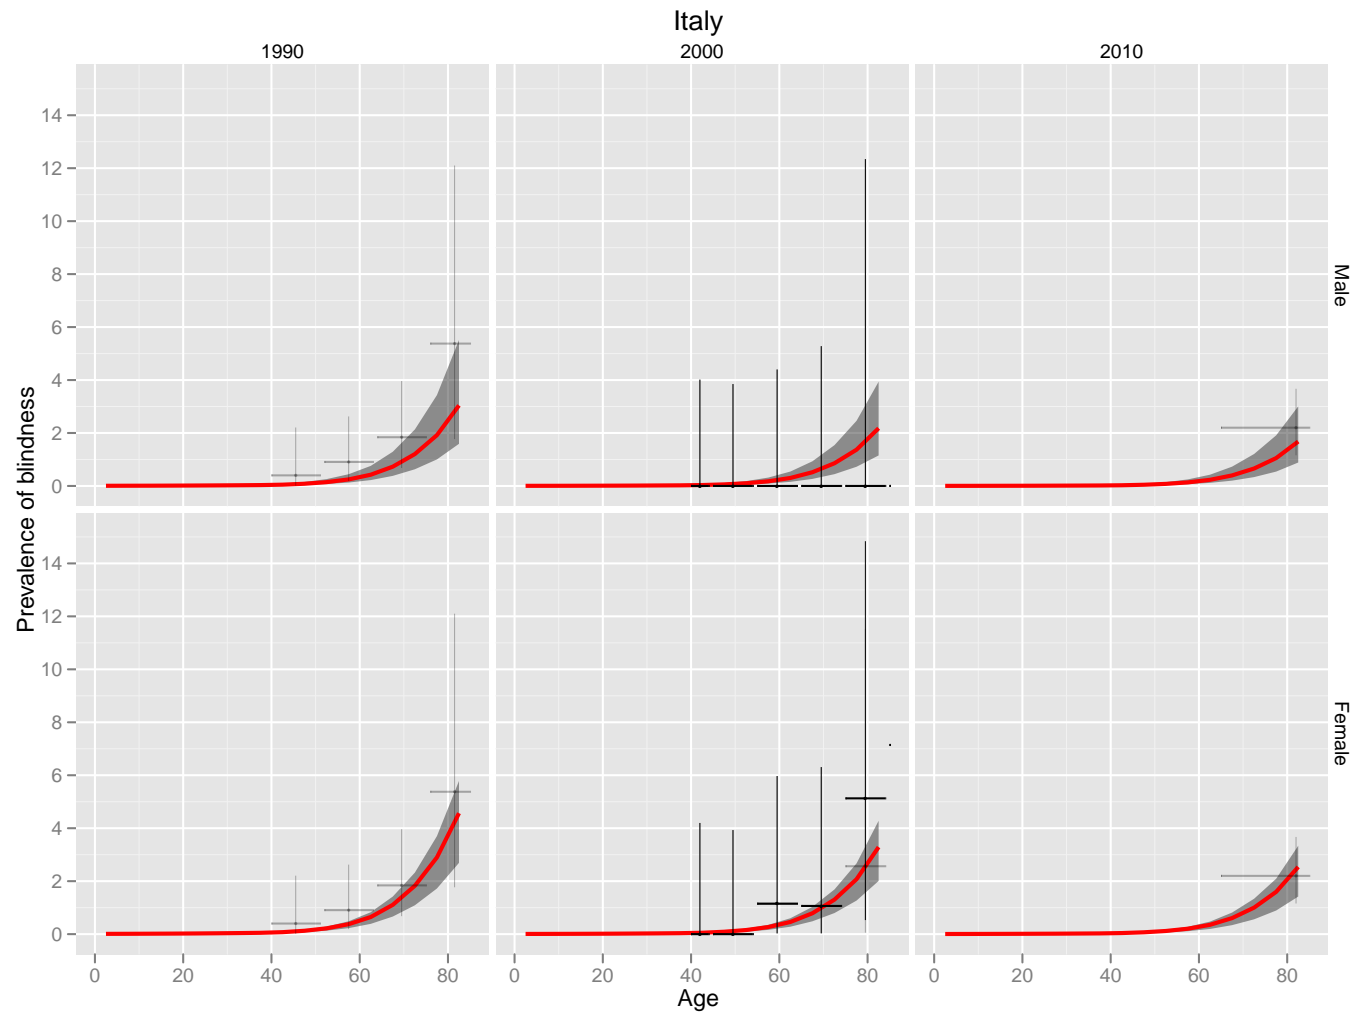



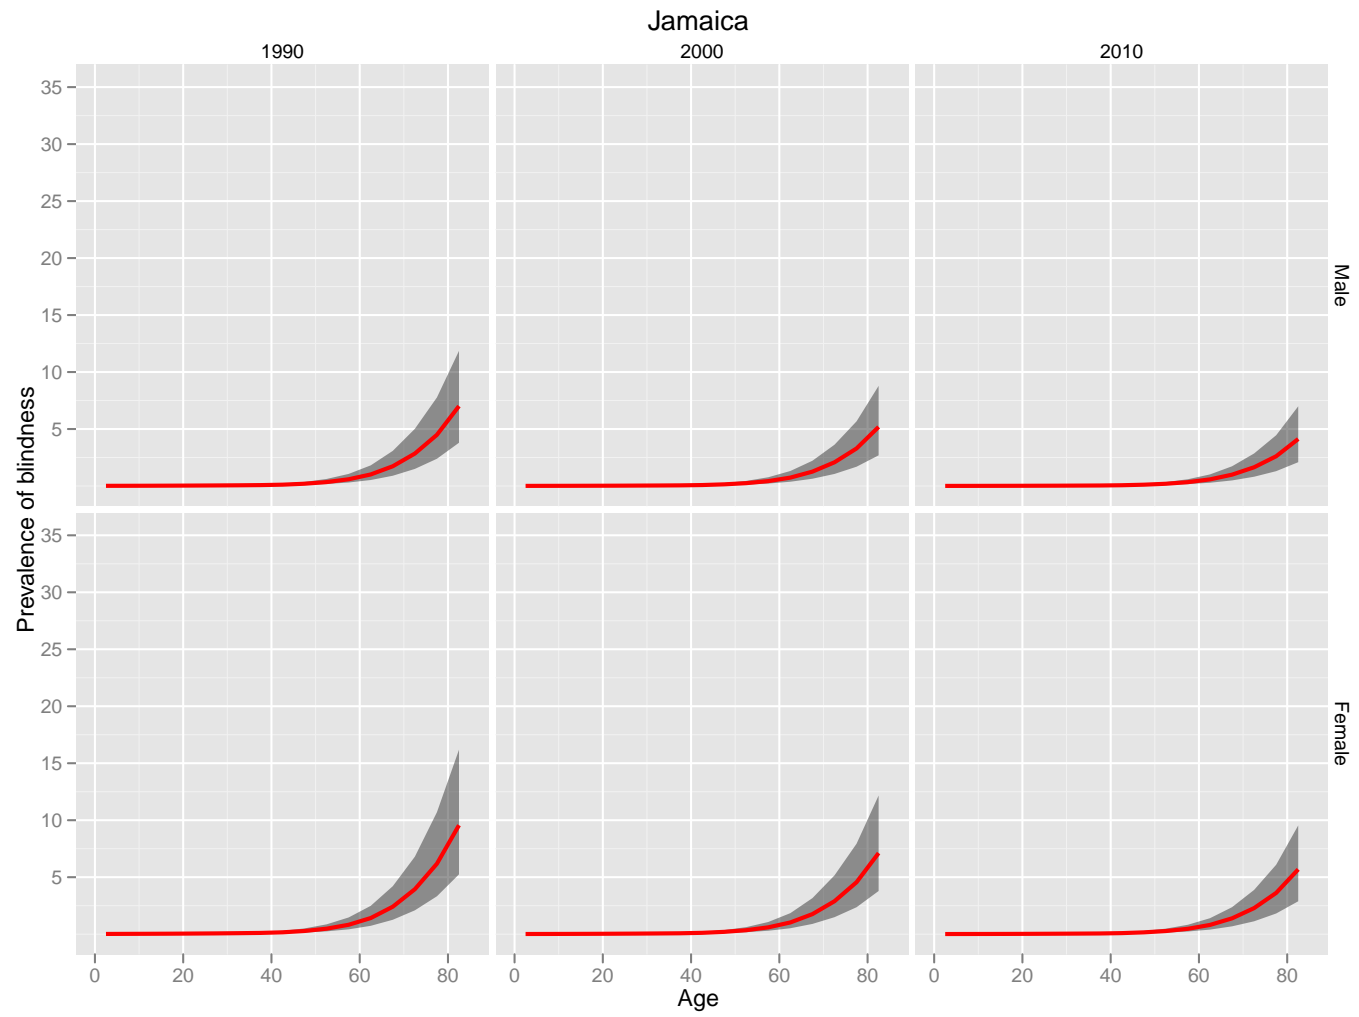

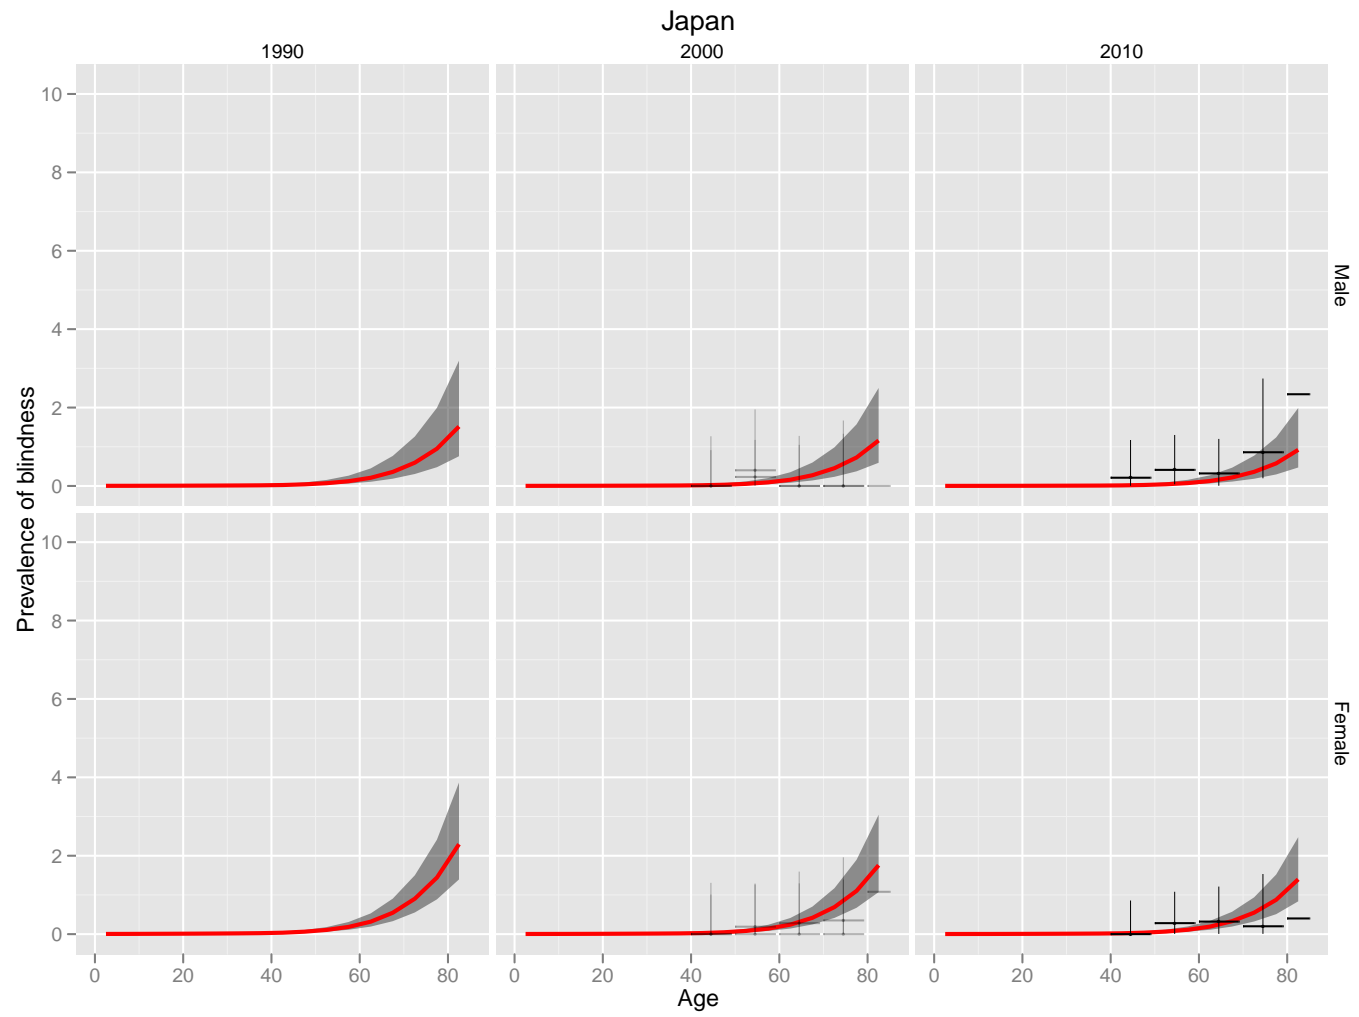

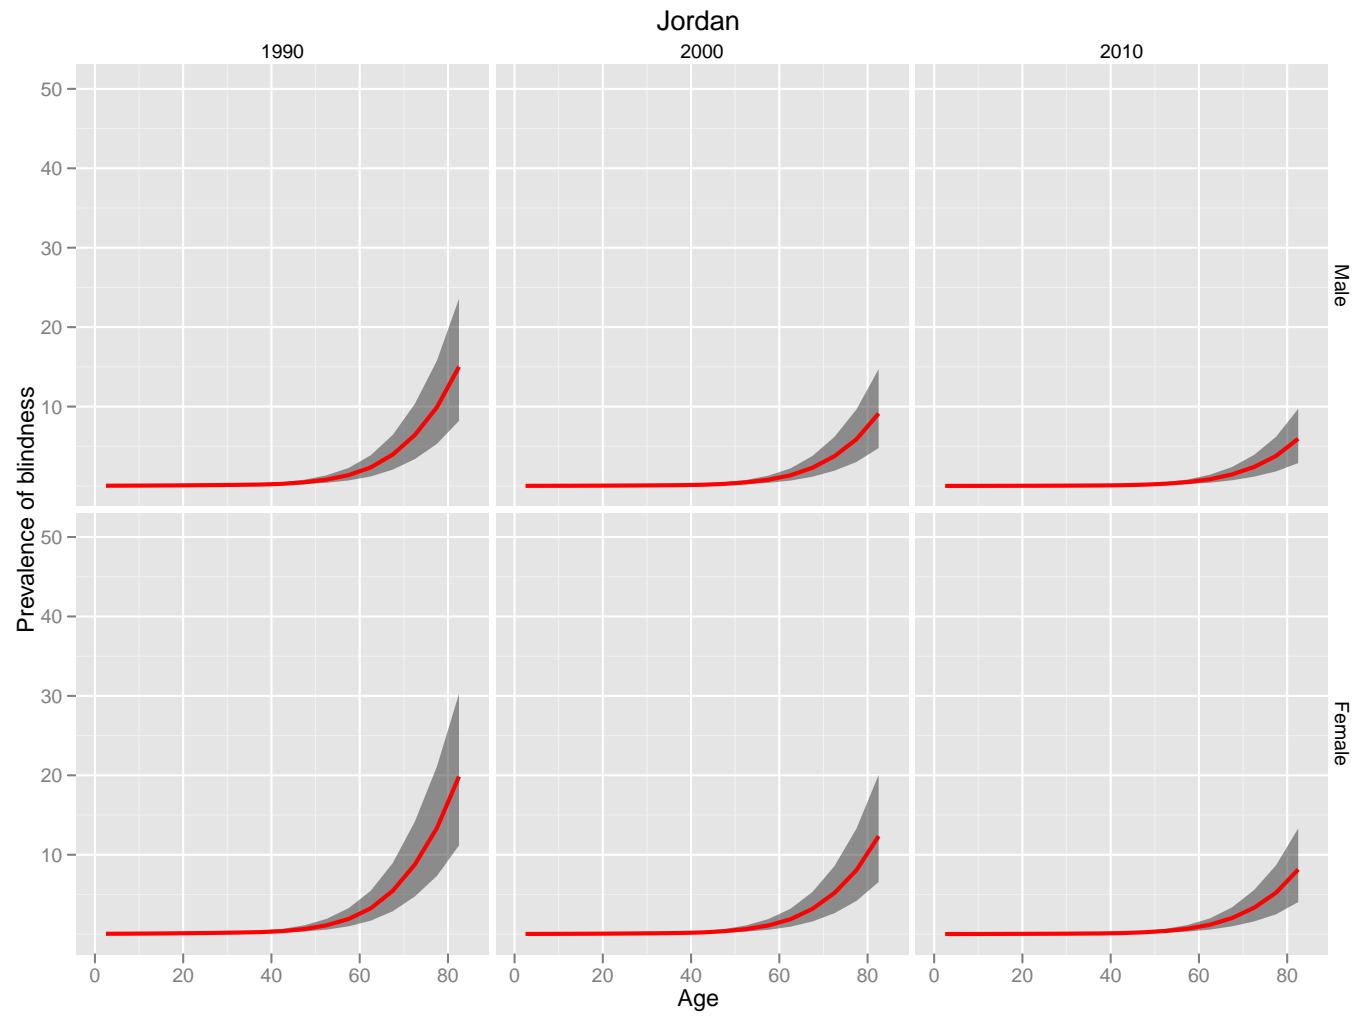

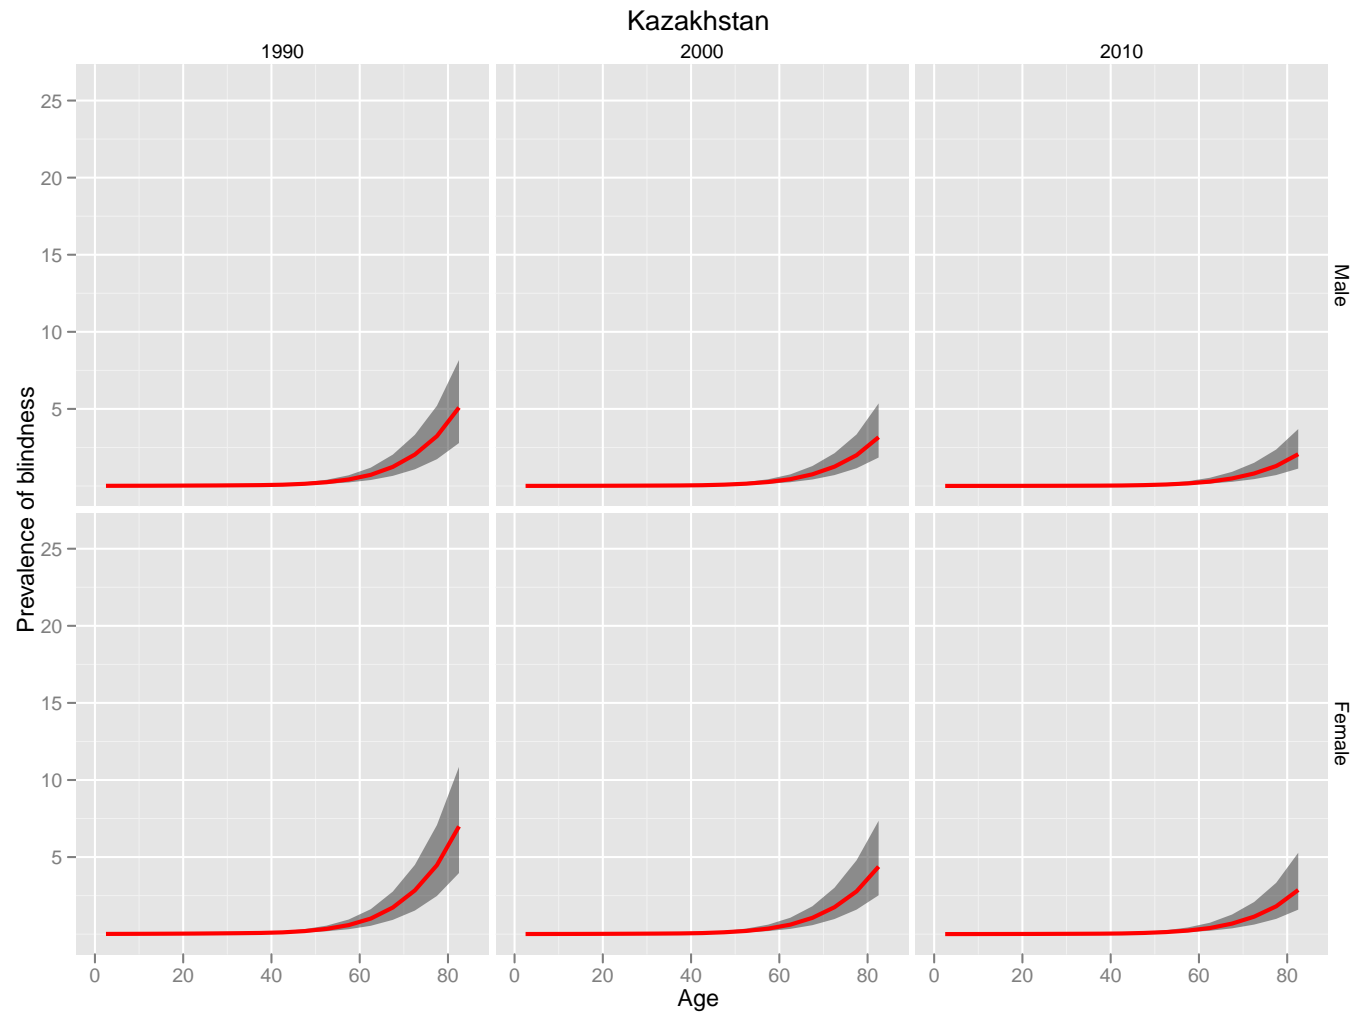

Kenya

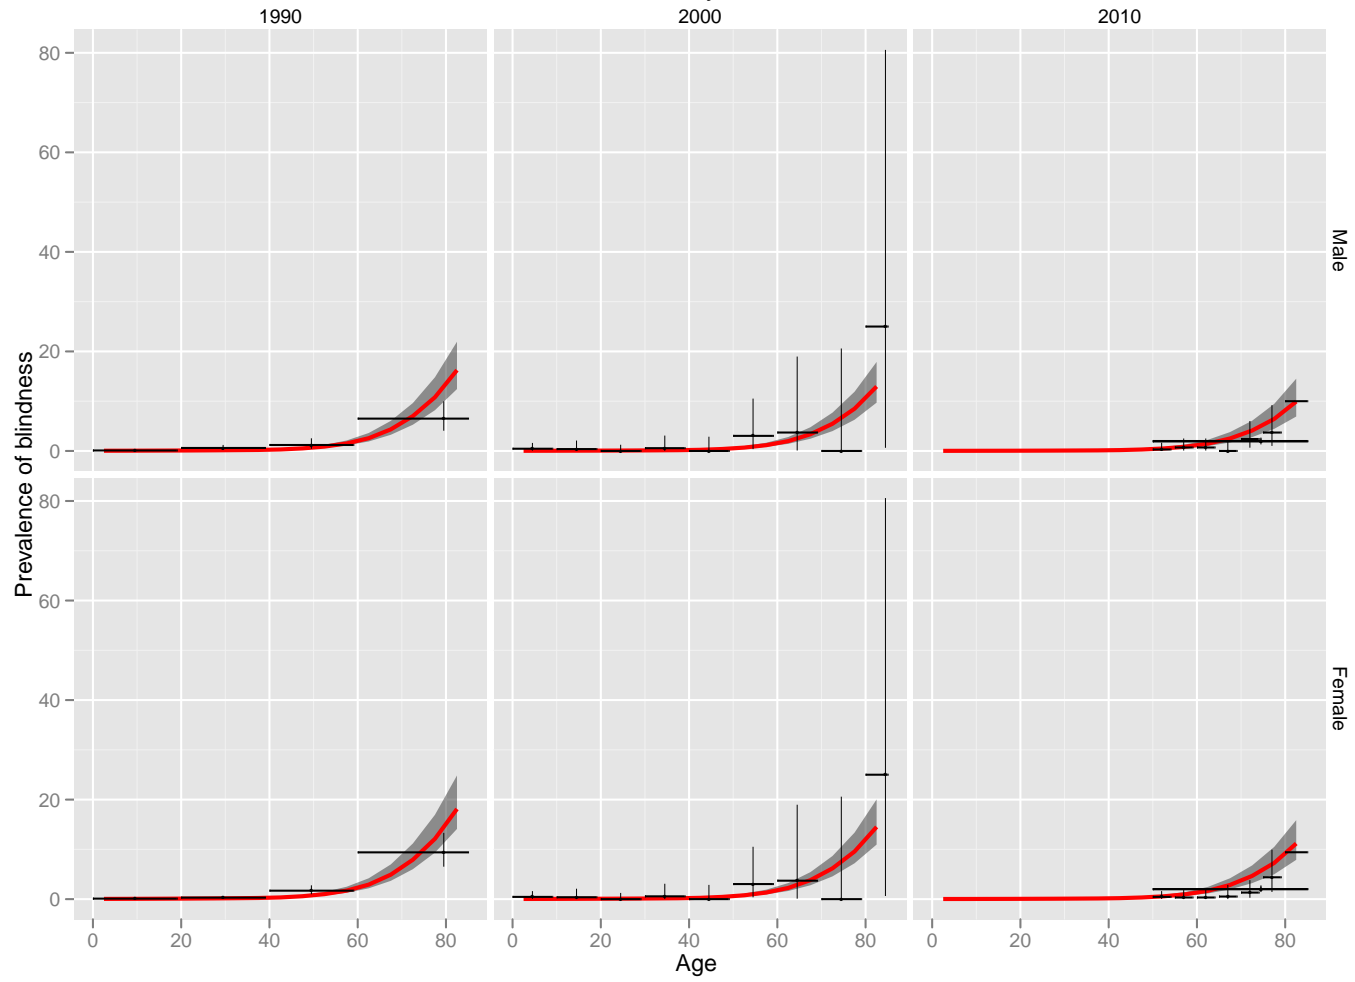

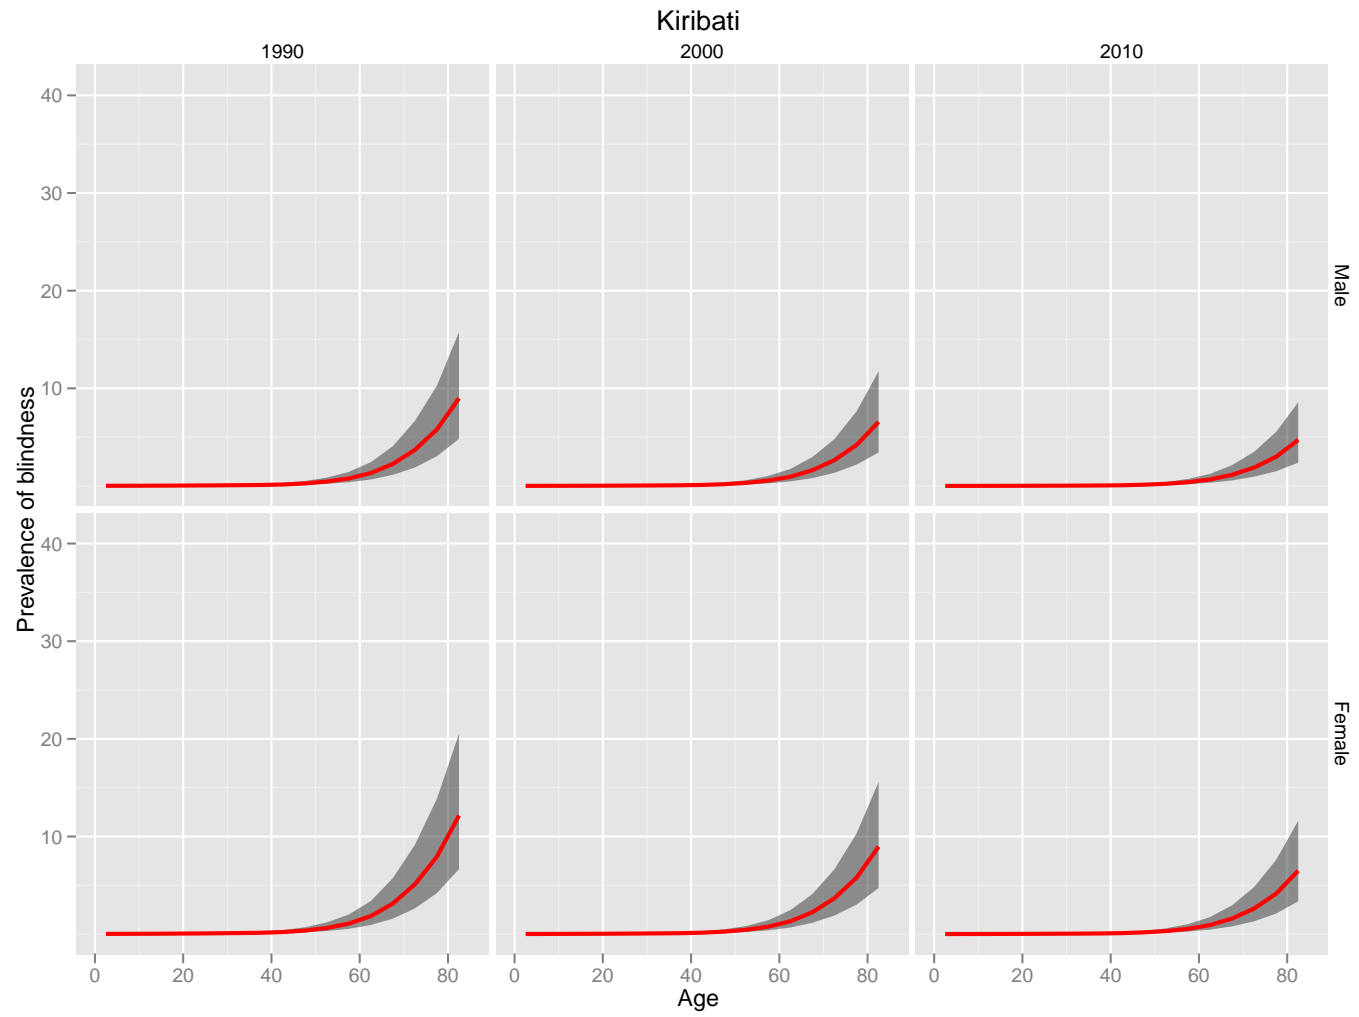

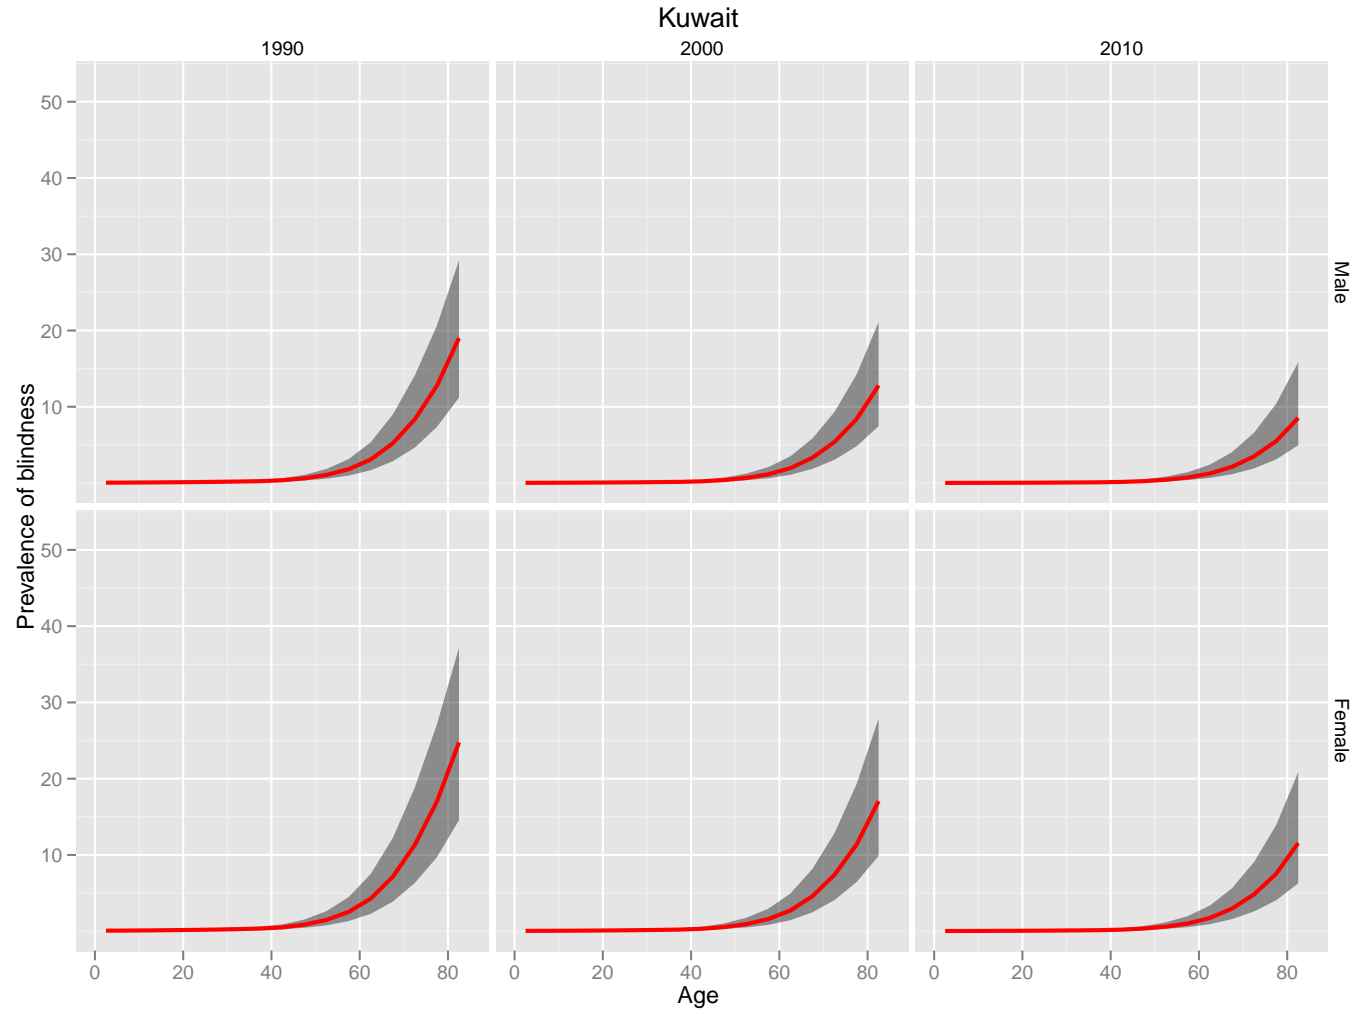

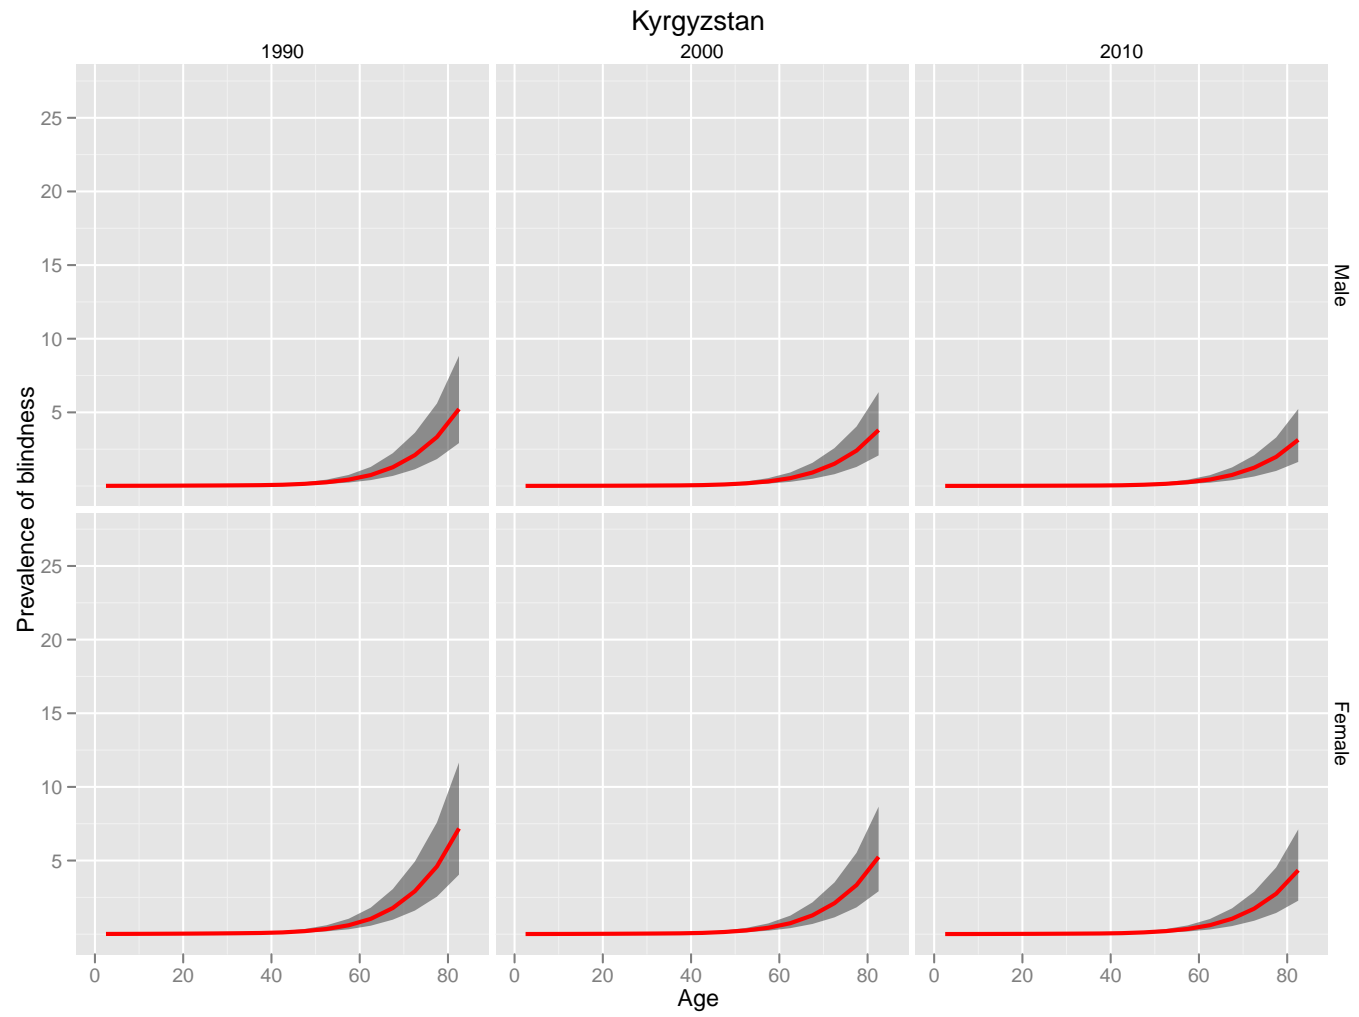



Lao People's Democratic Republic

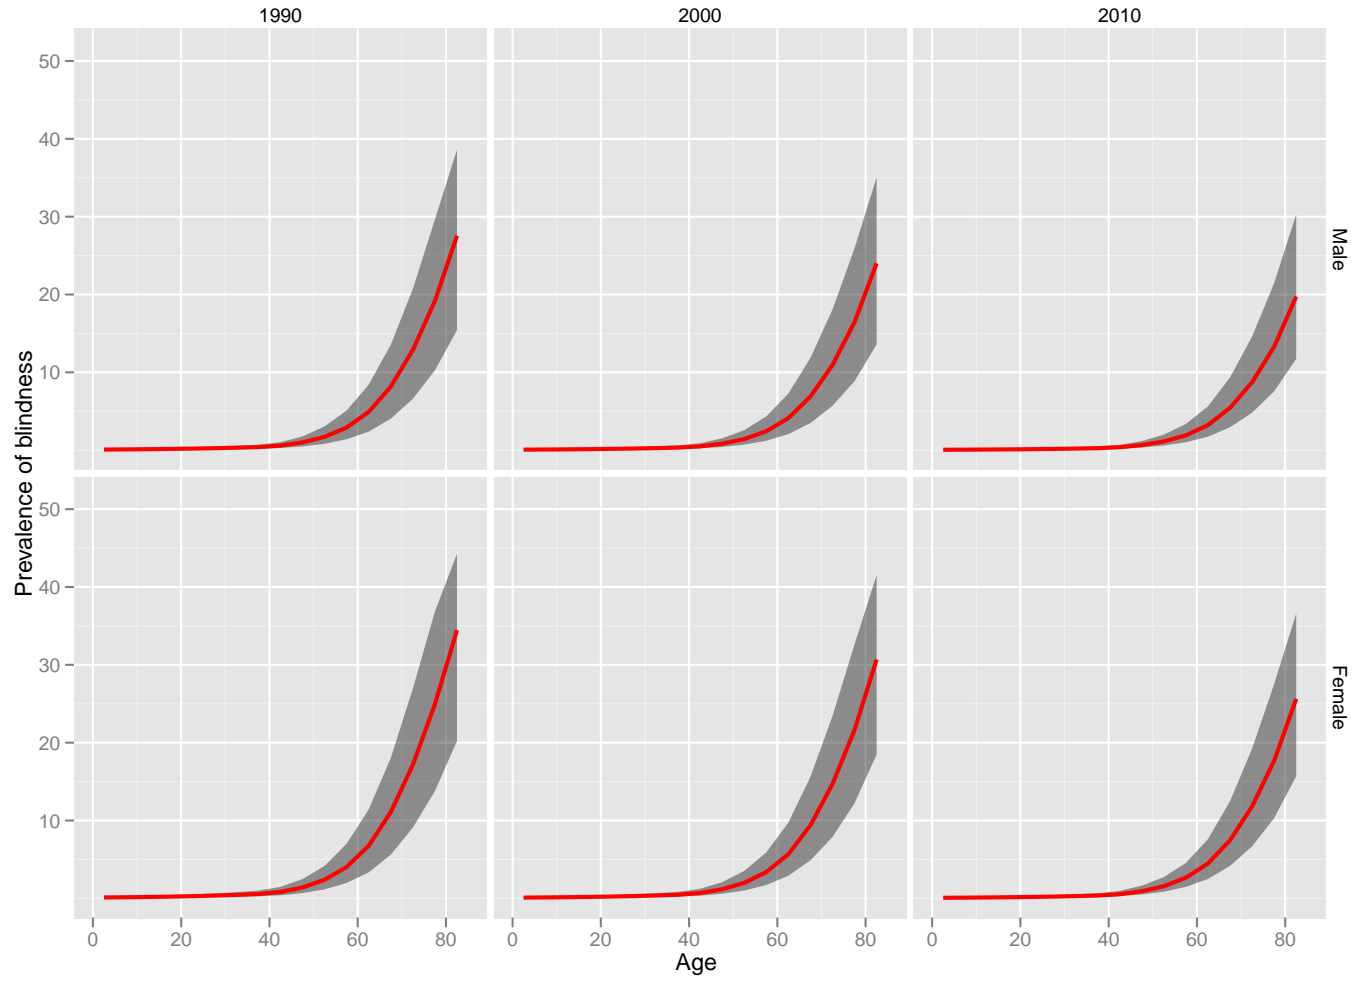

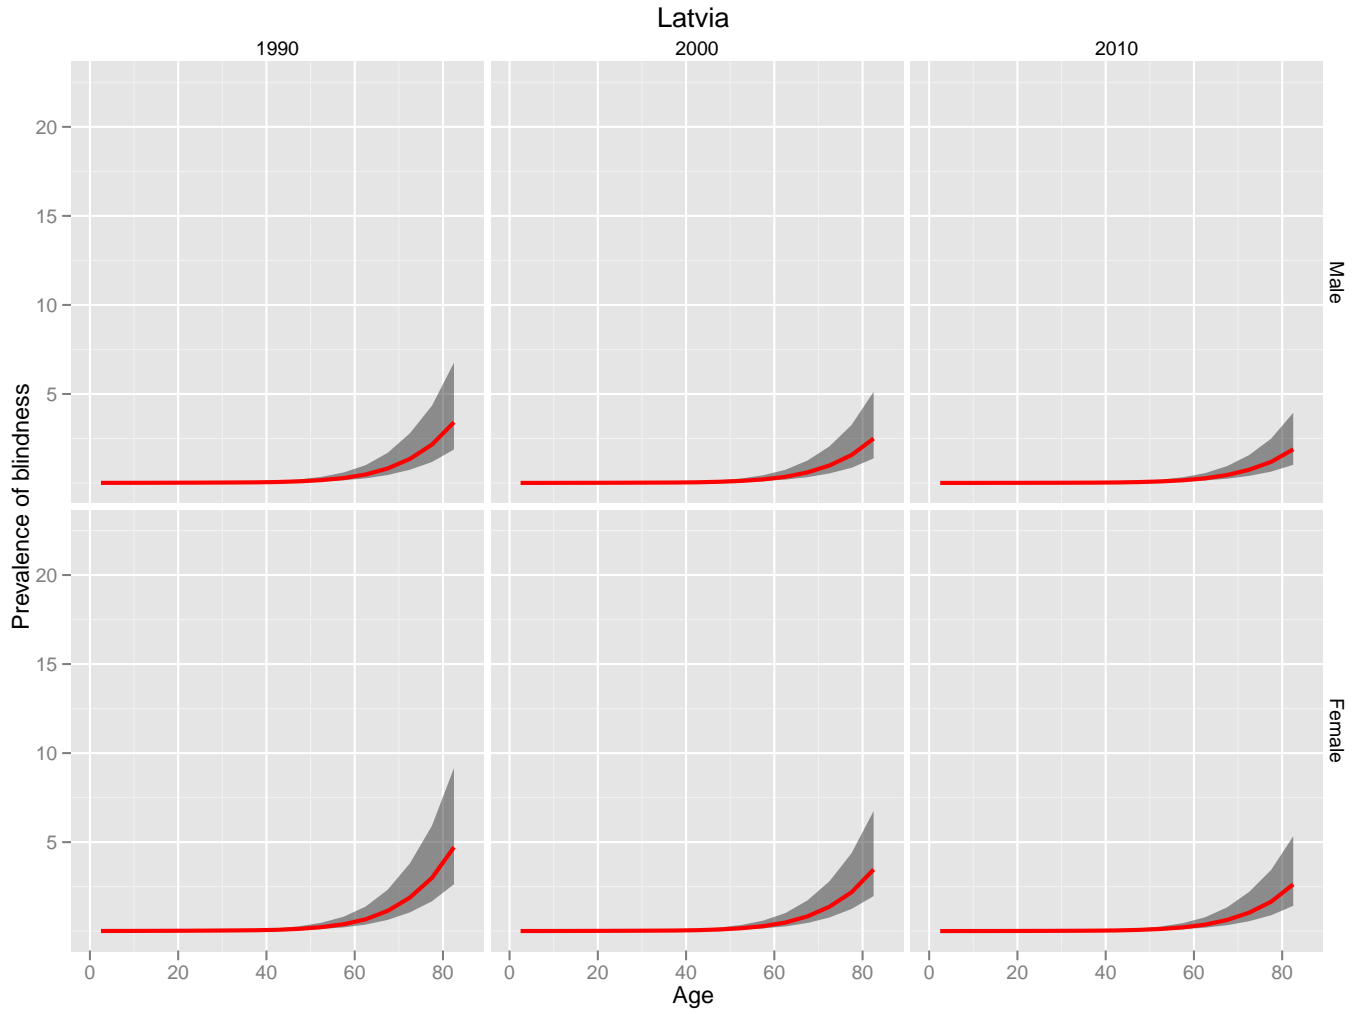

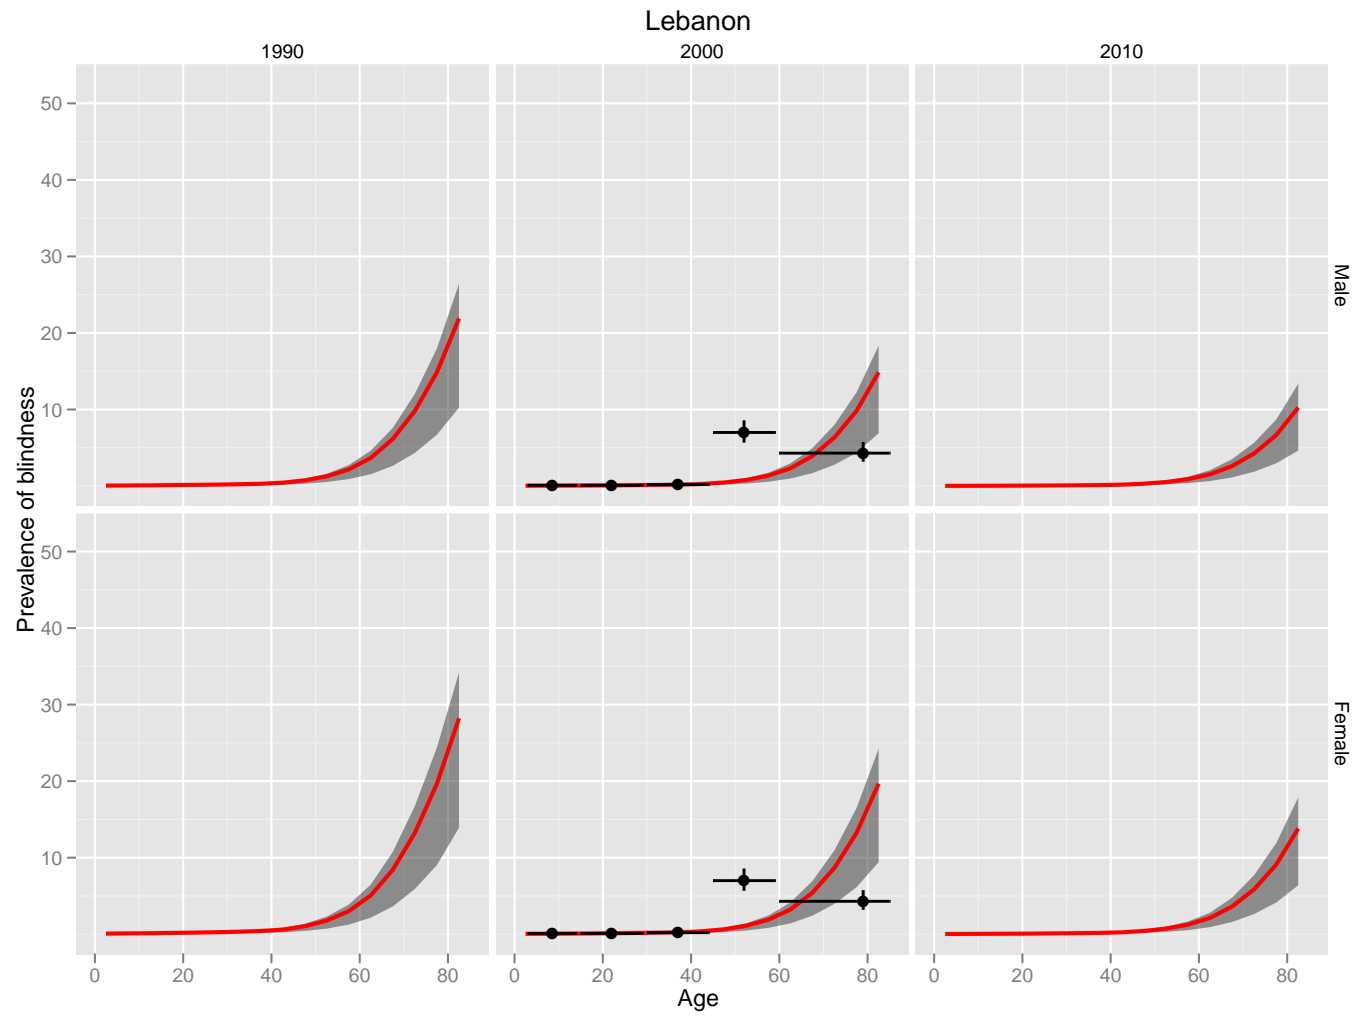

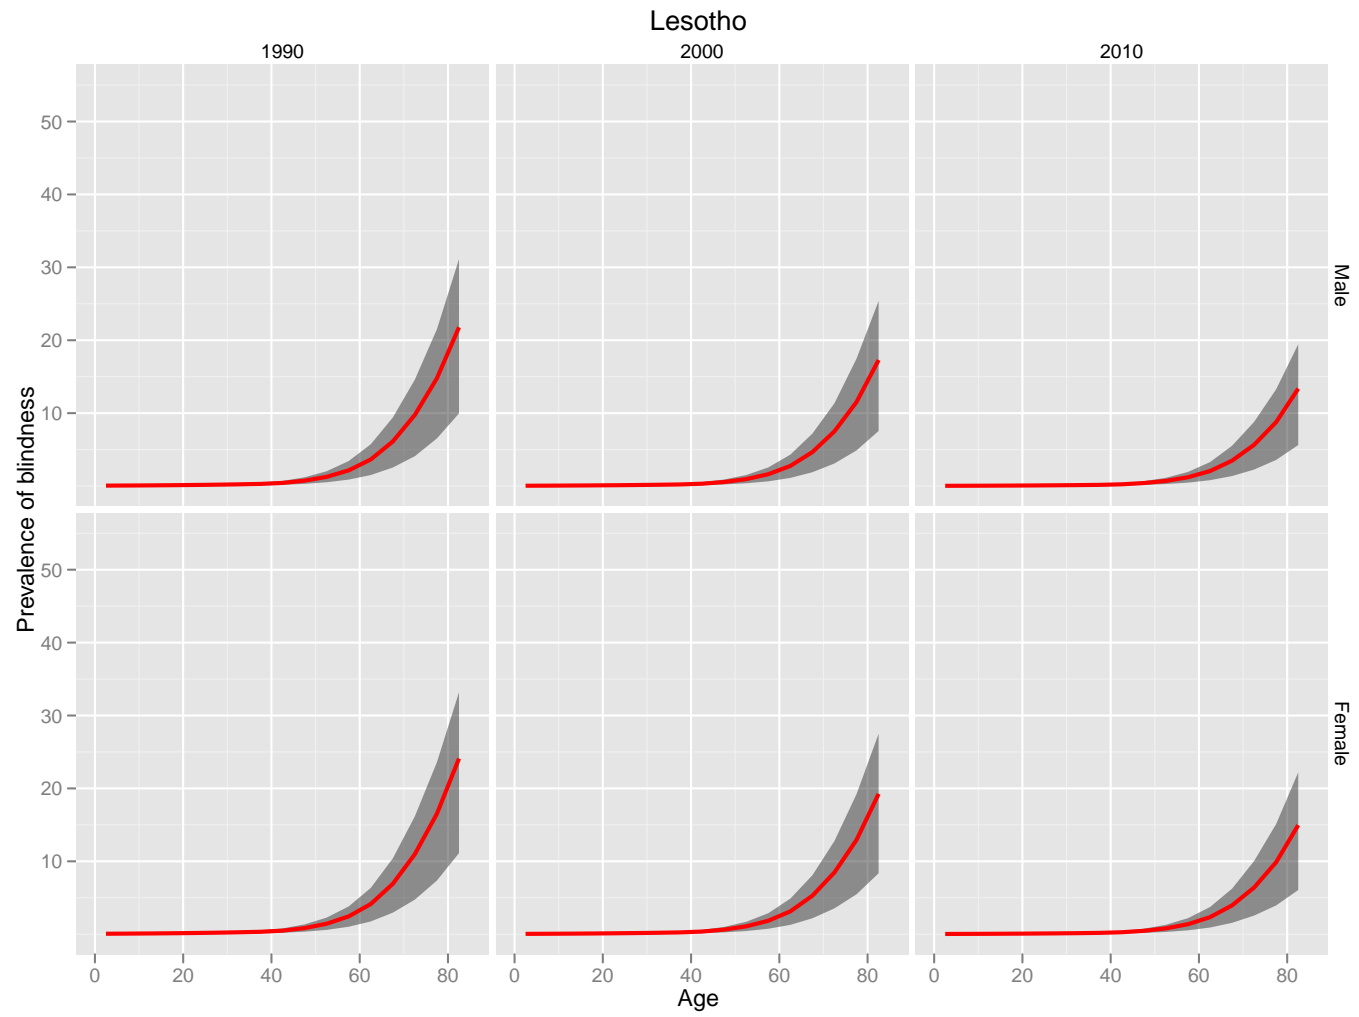

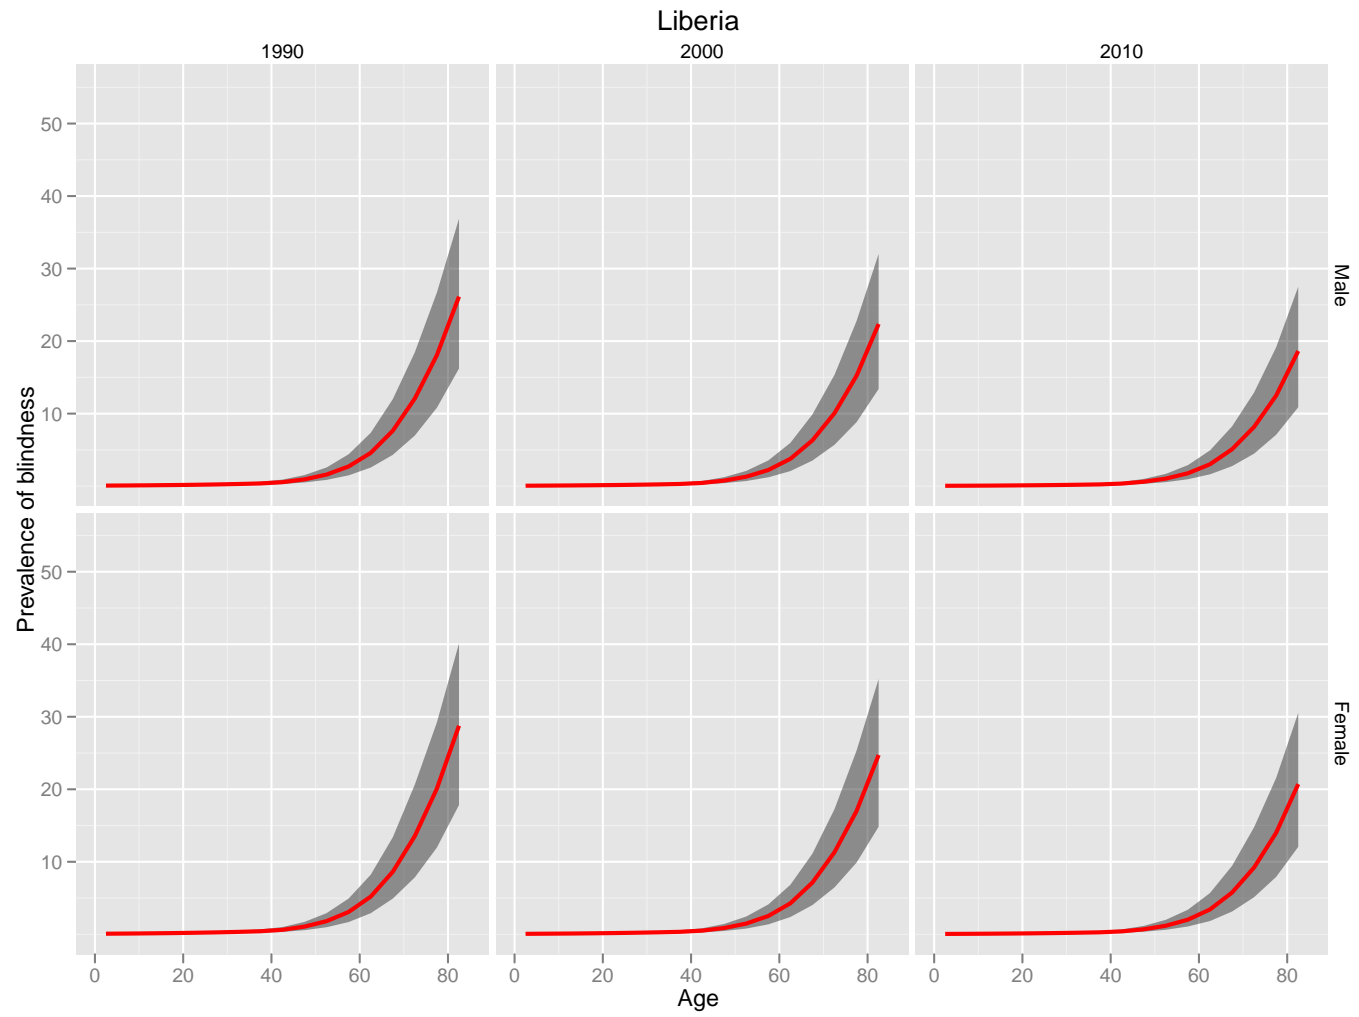

Libyan Arab Jamahiriya

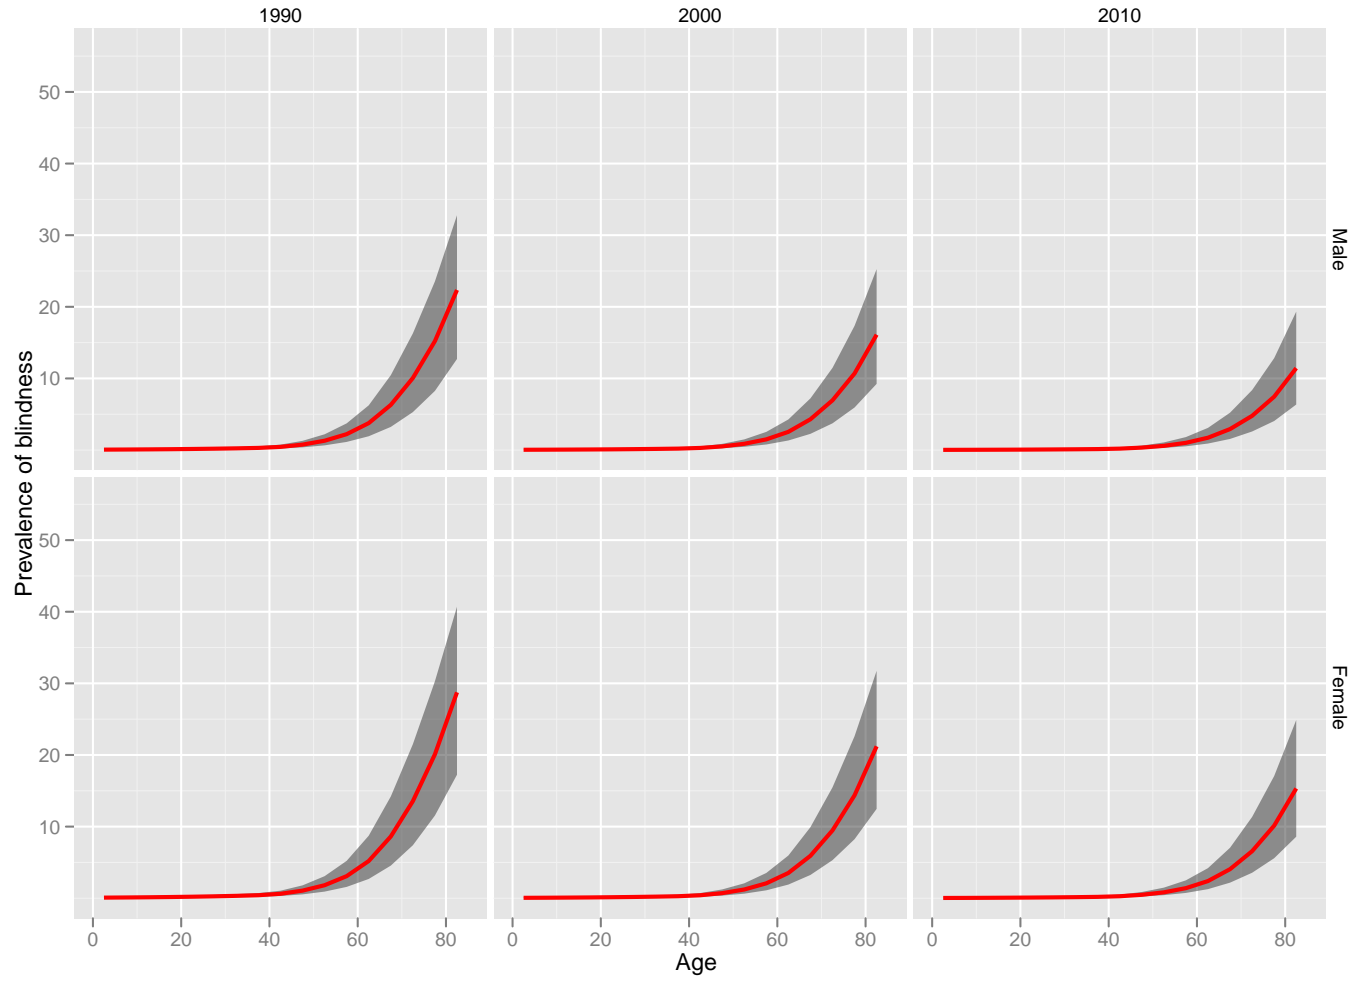

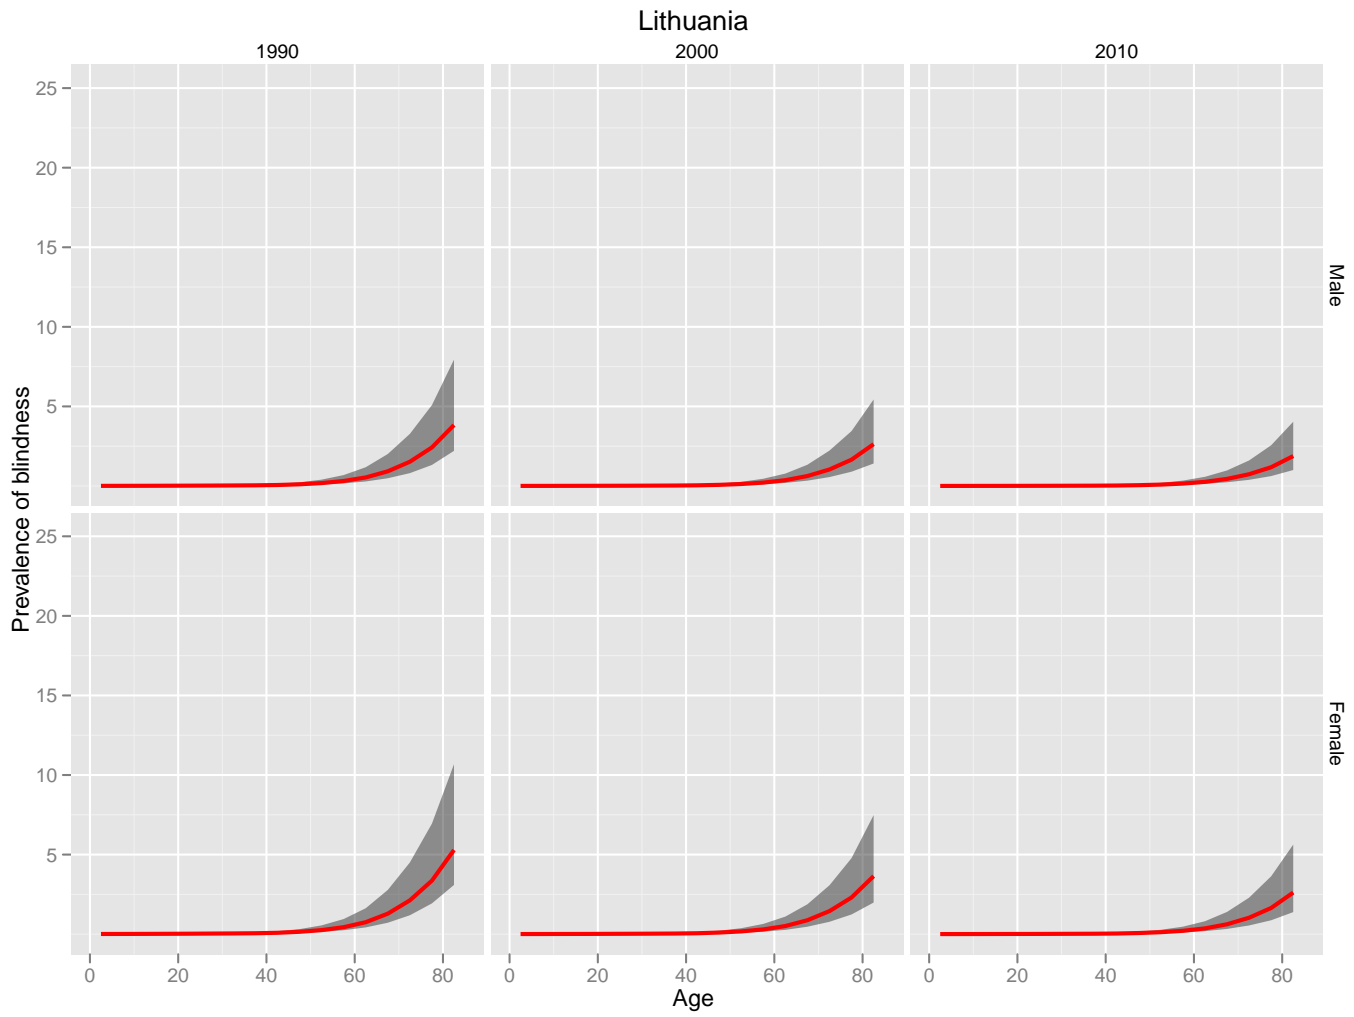

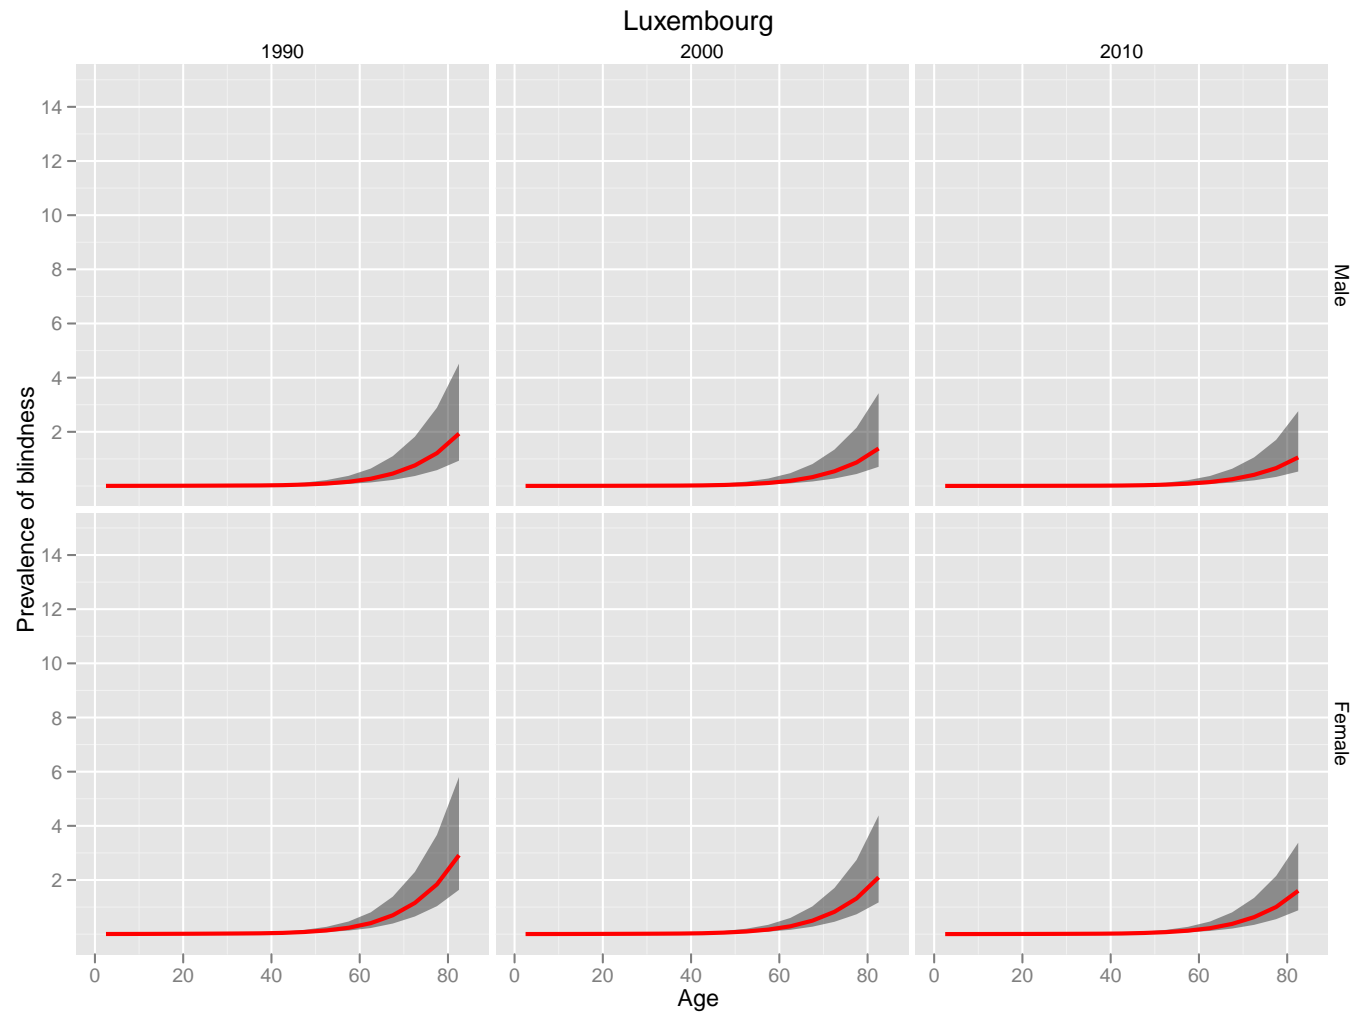



Madagascar

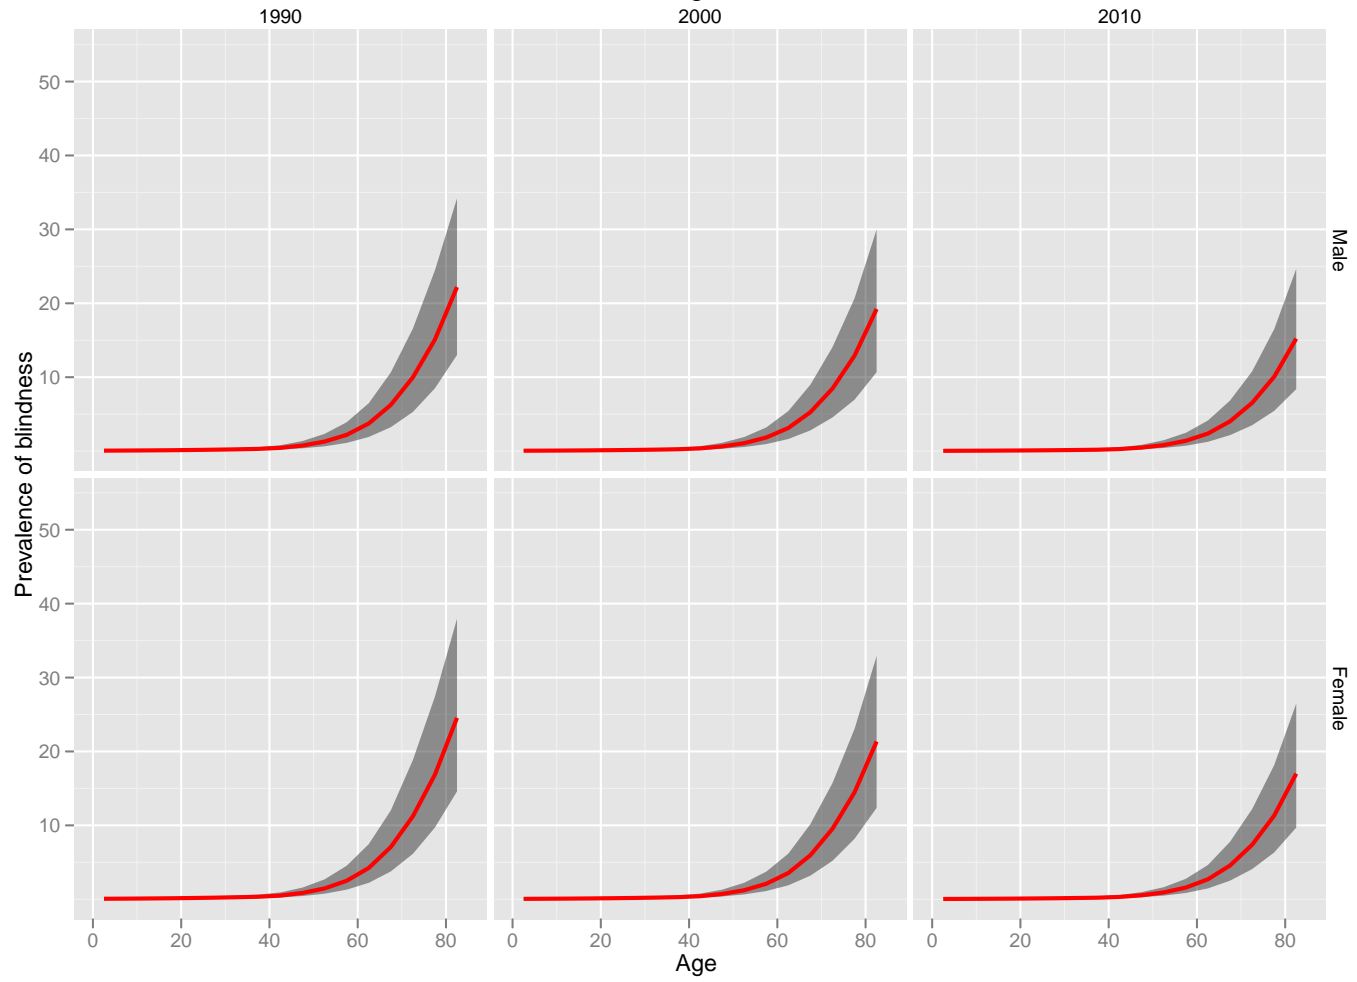

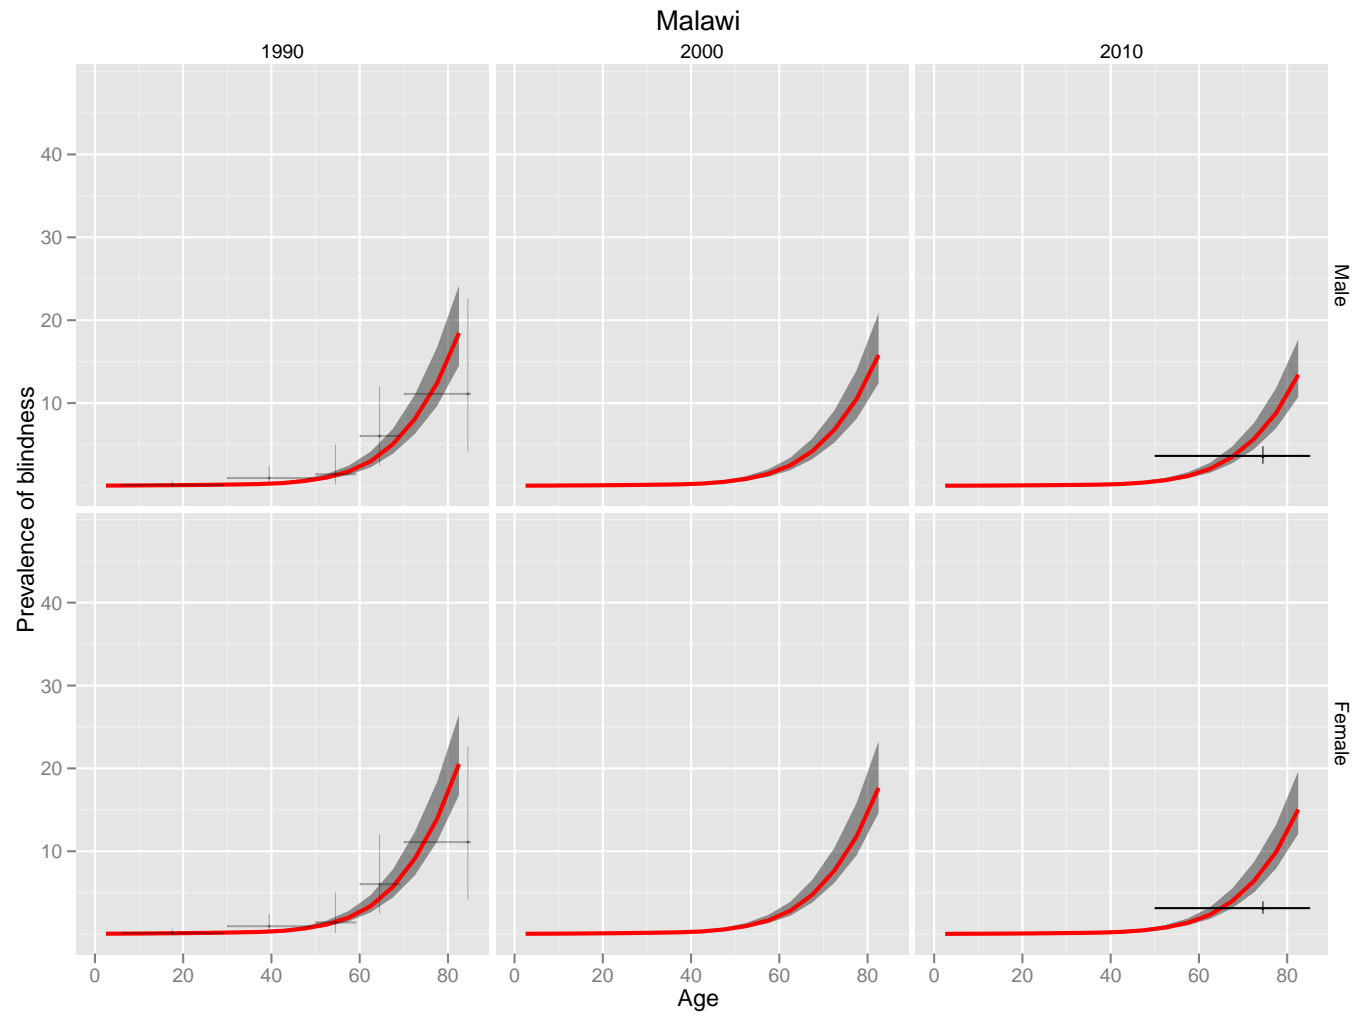

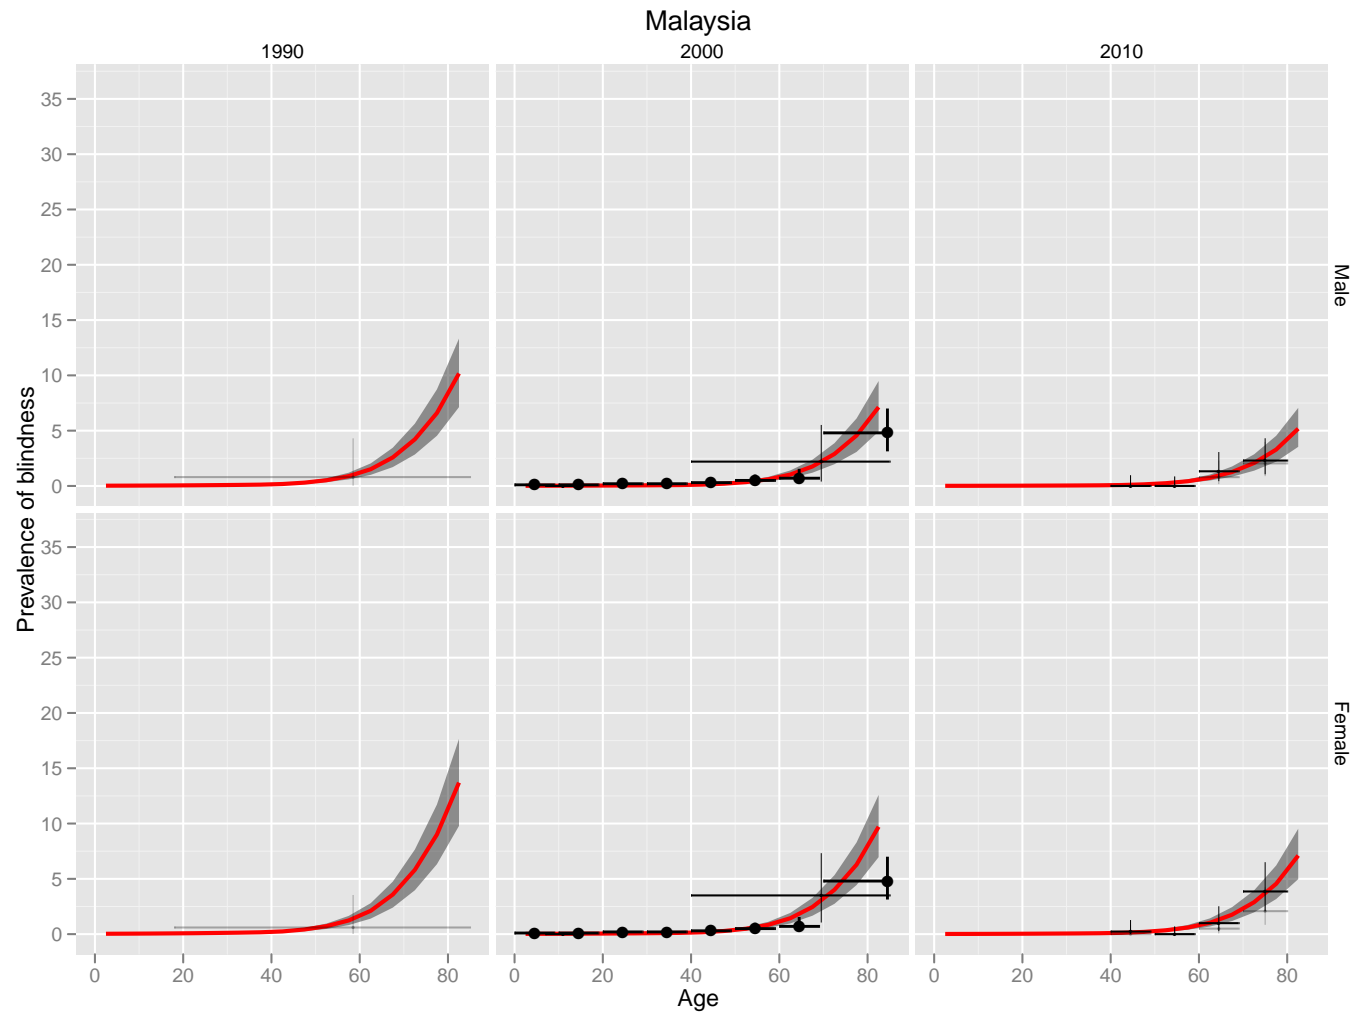

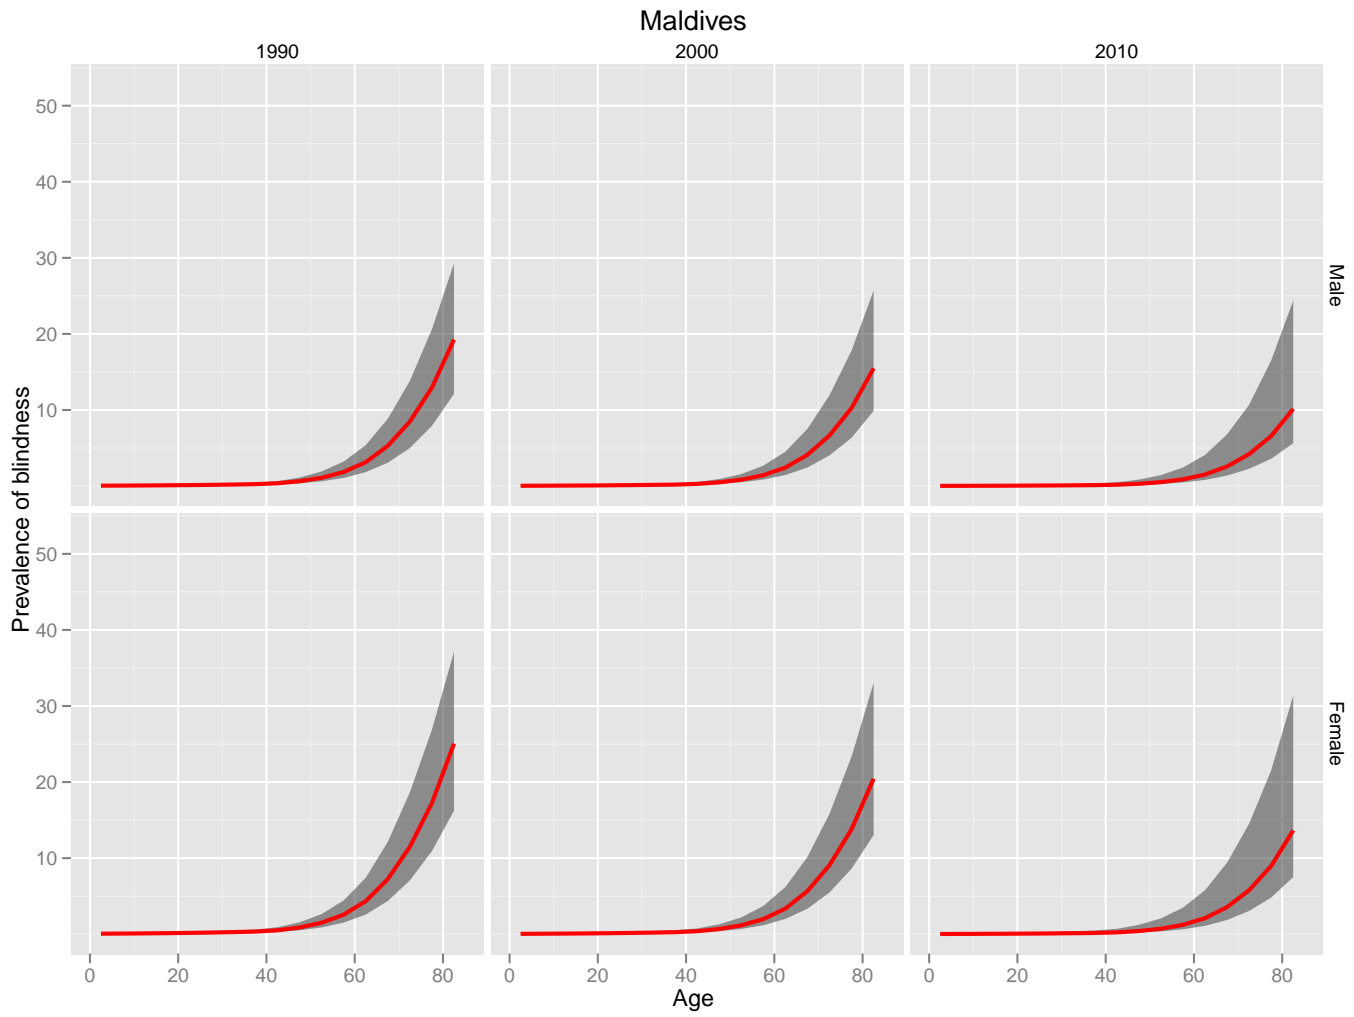

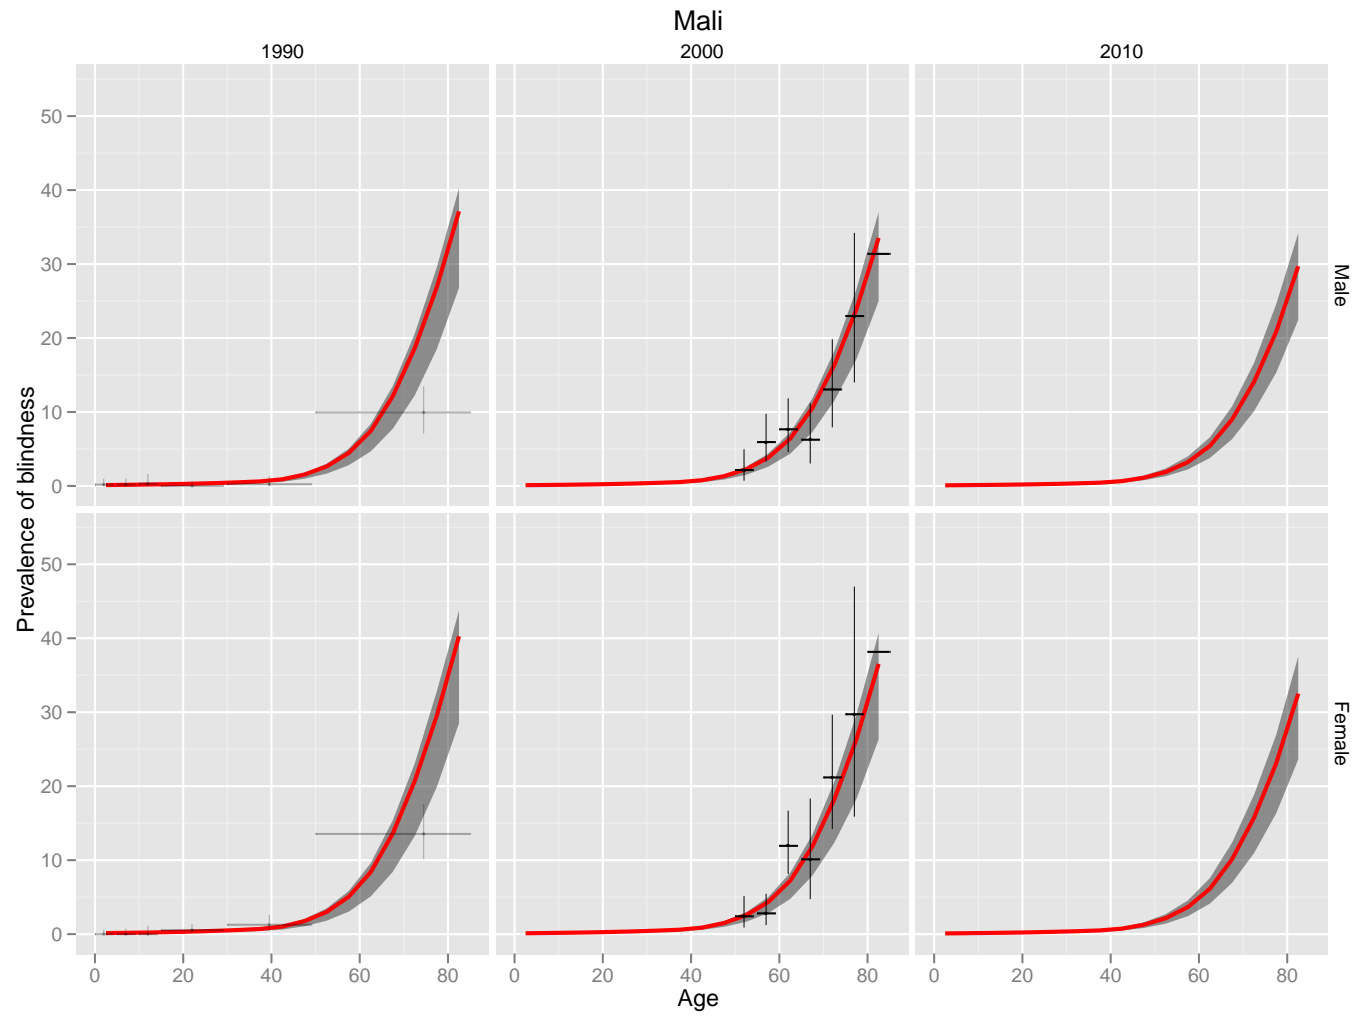

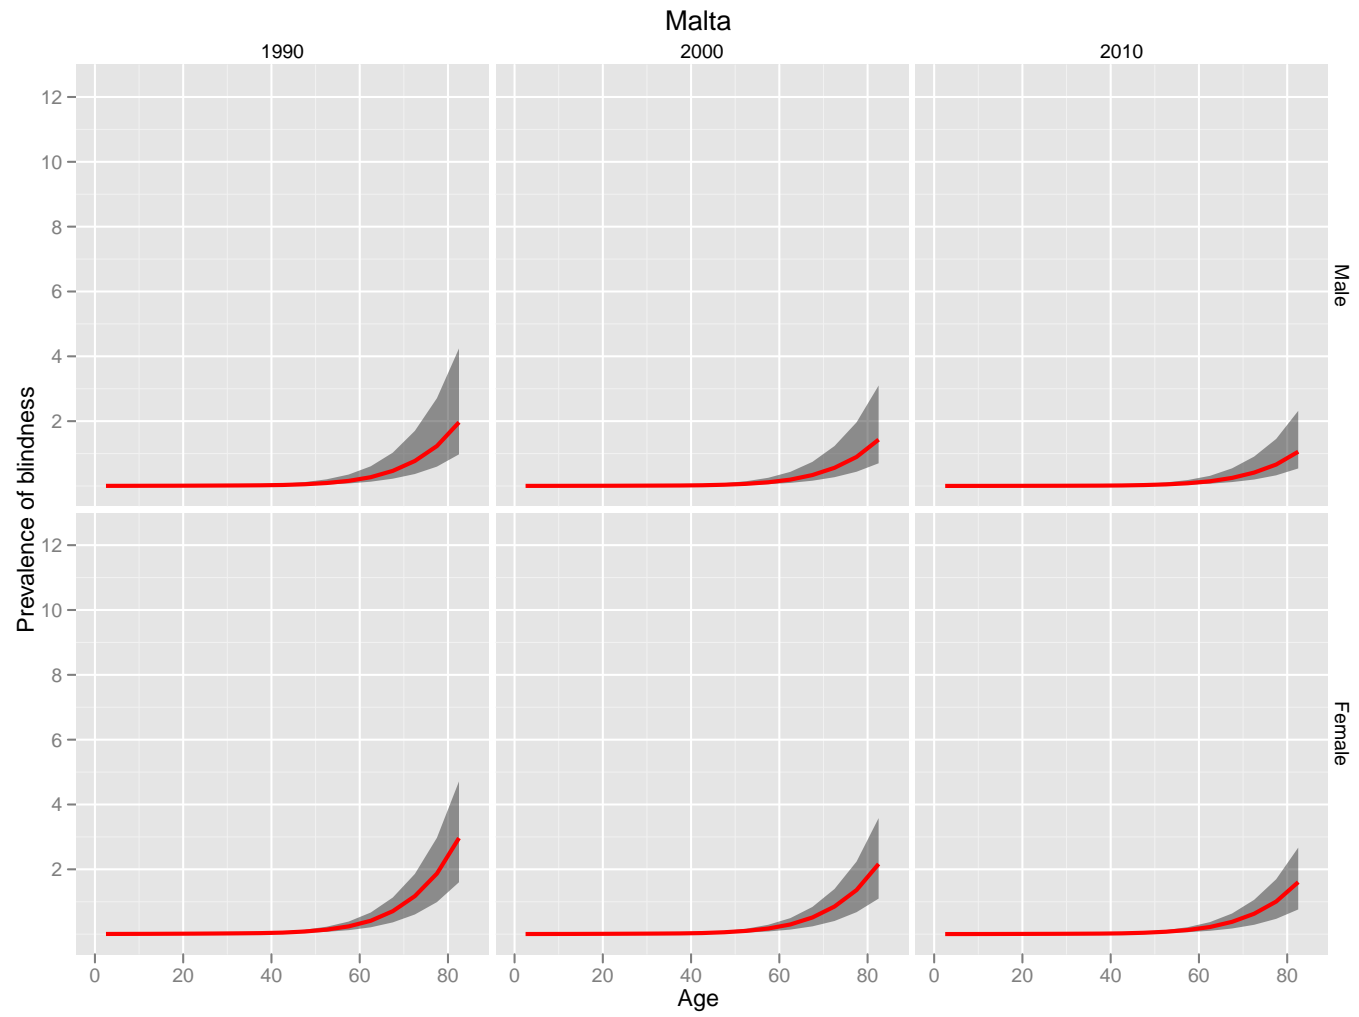

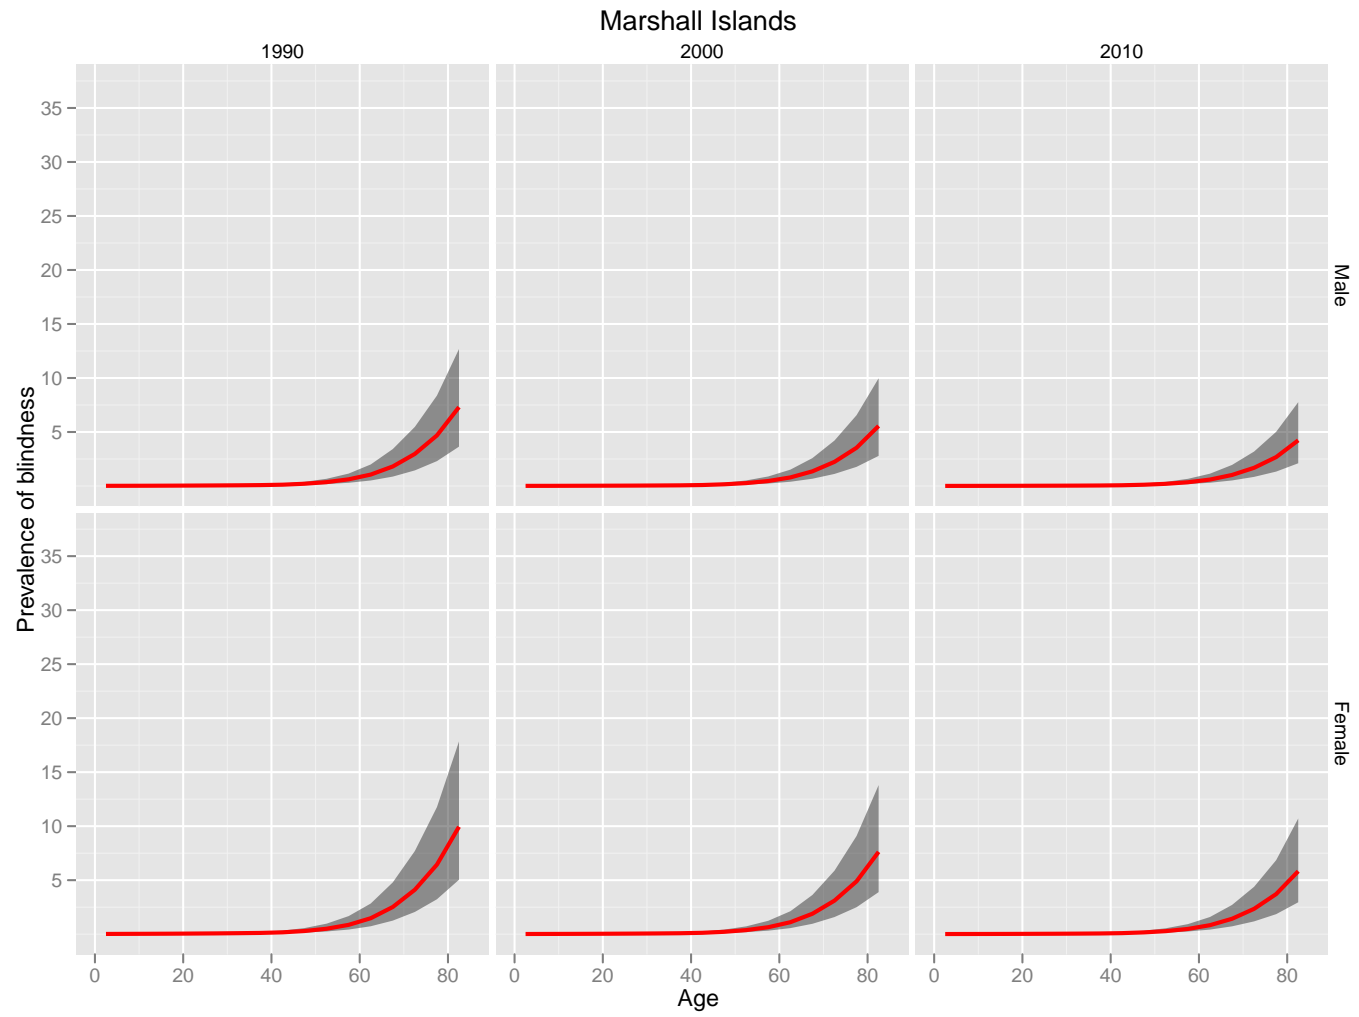

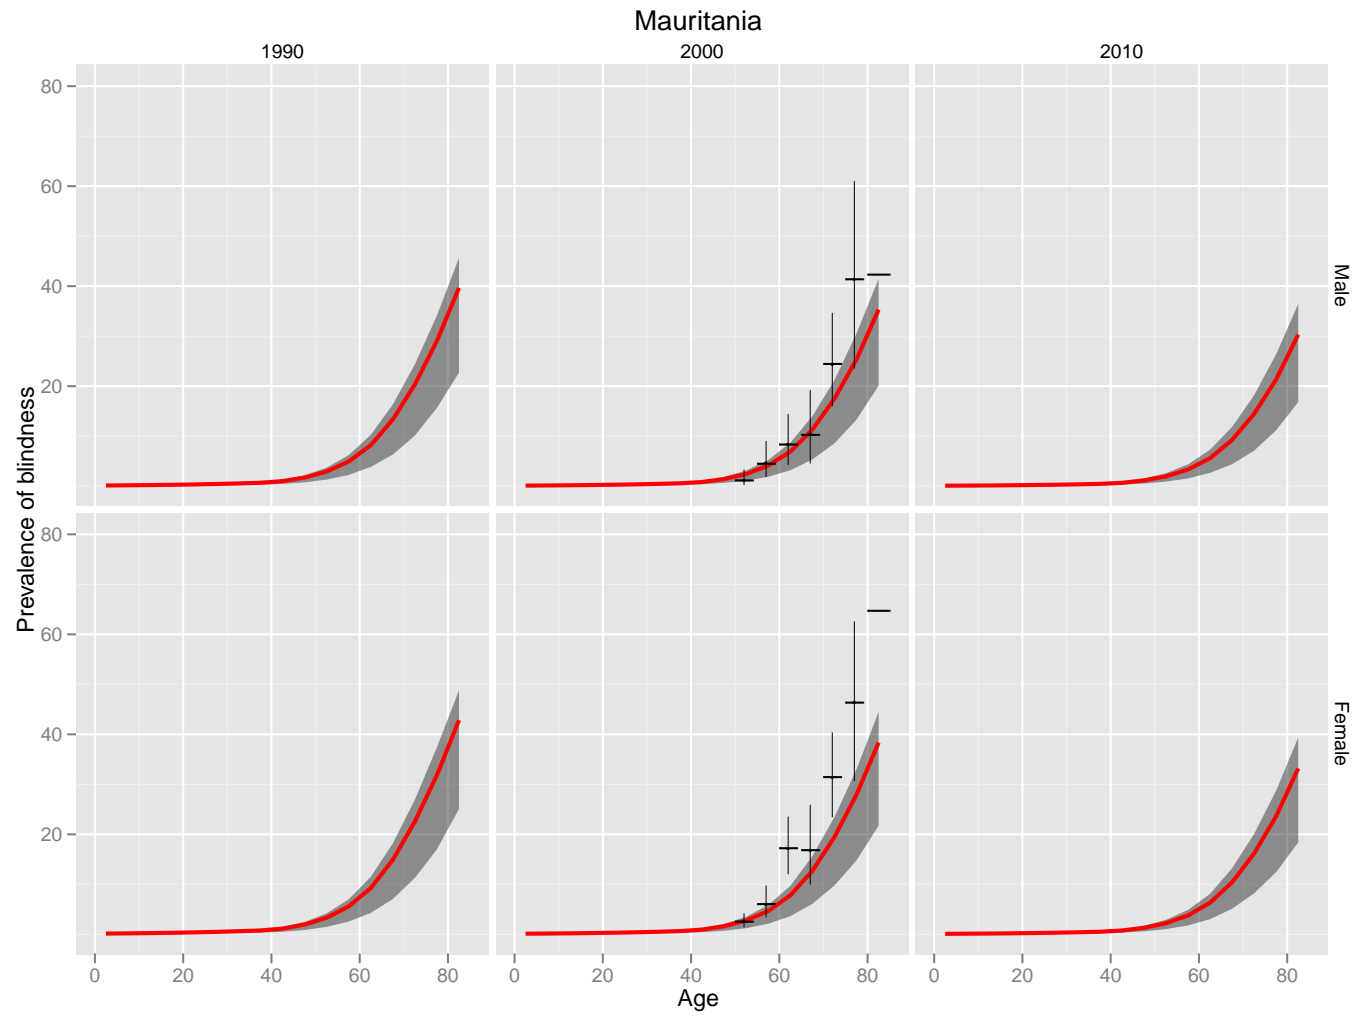



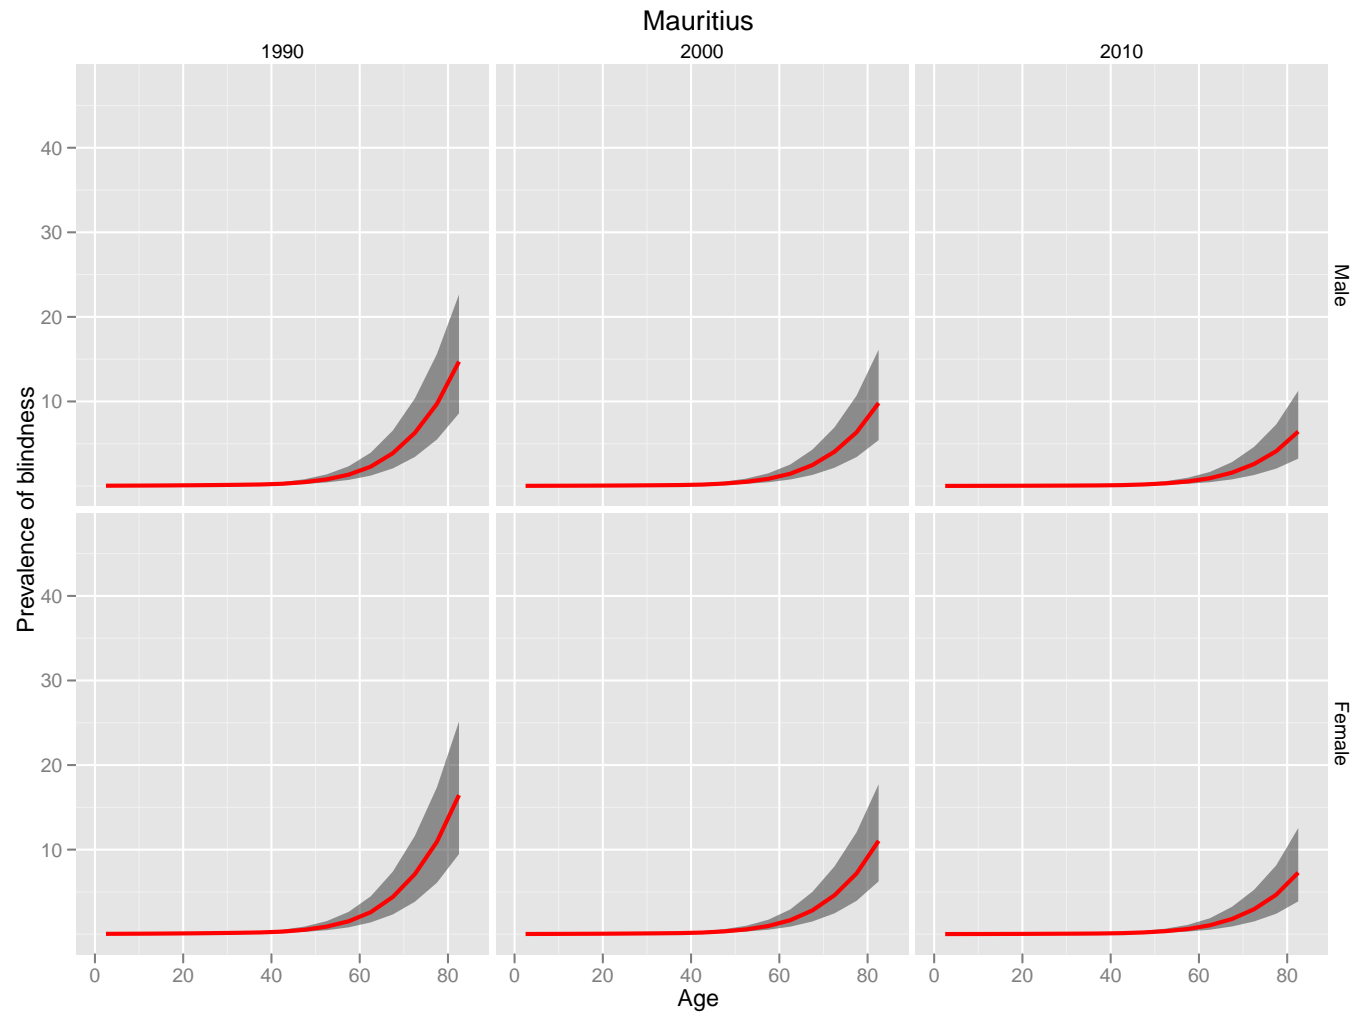

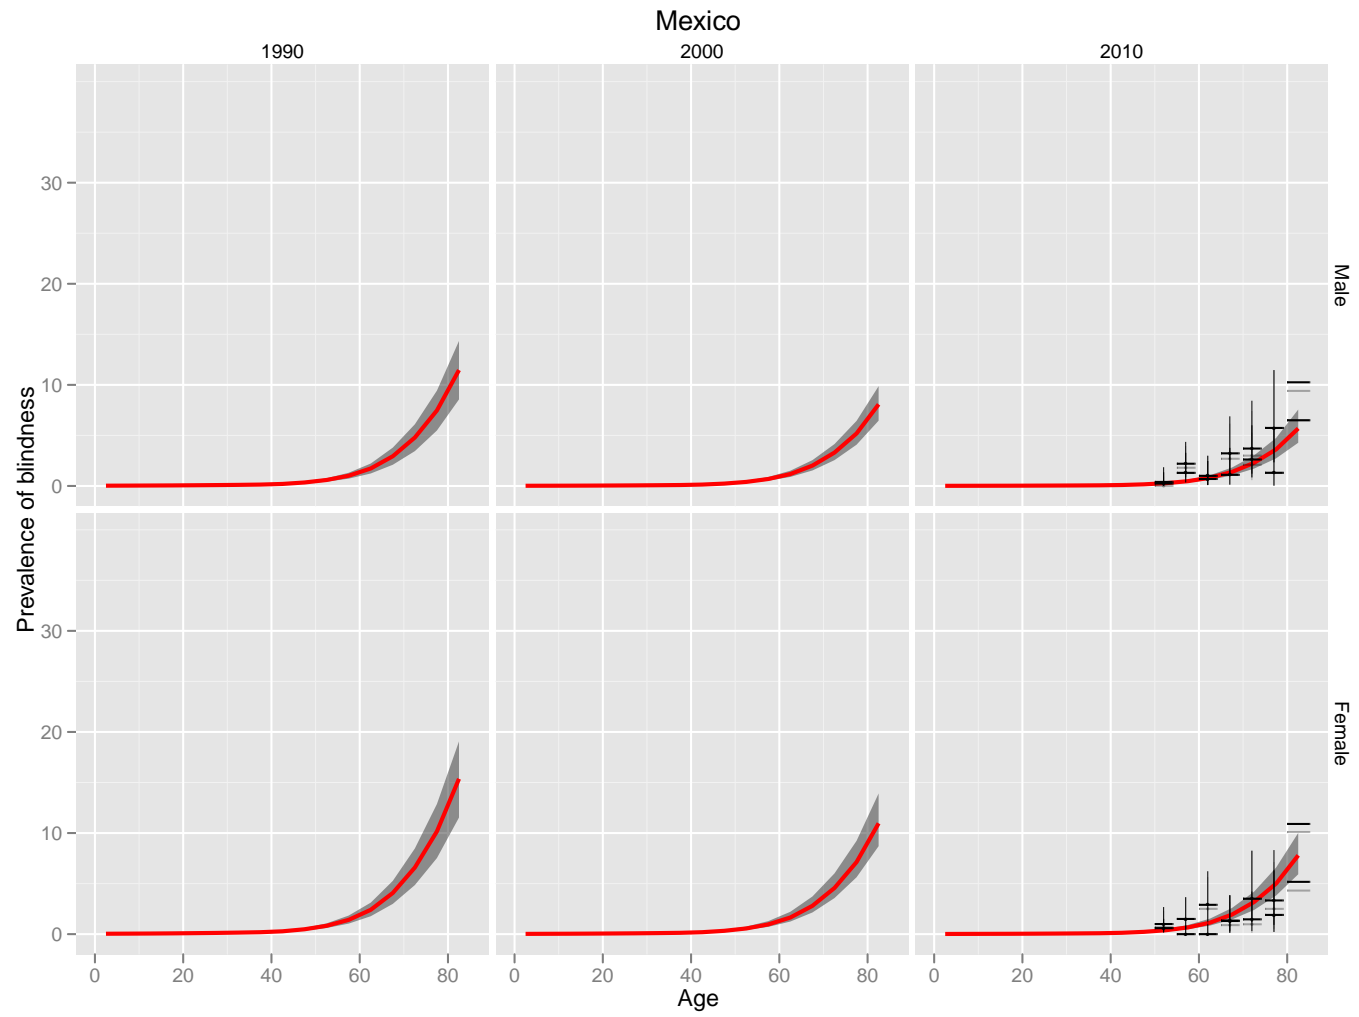

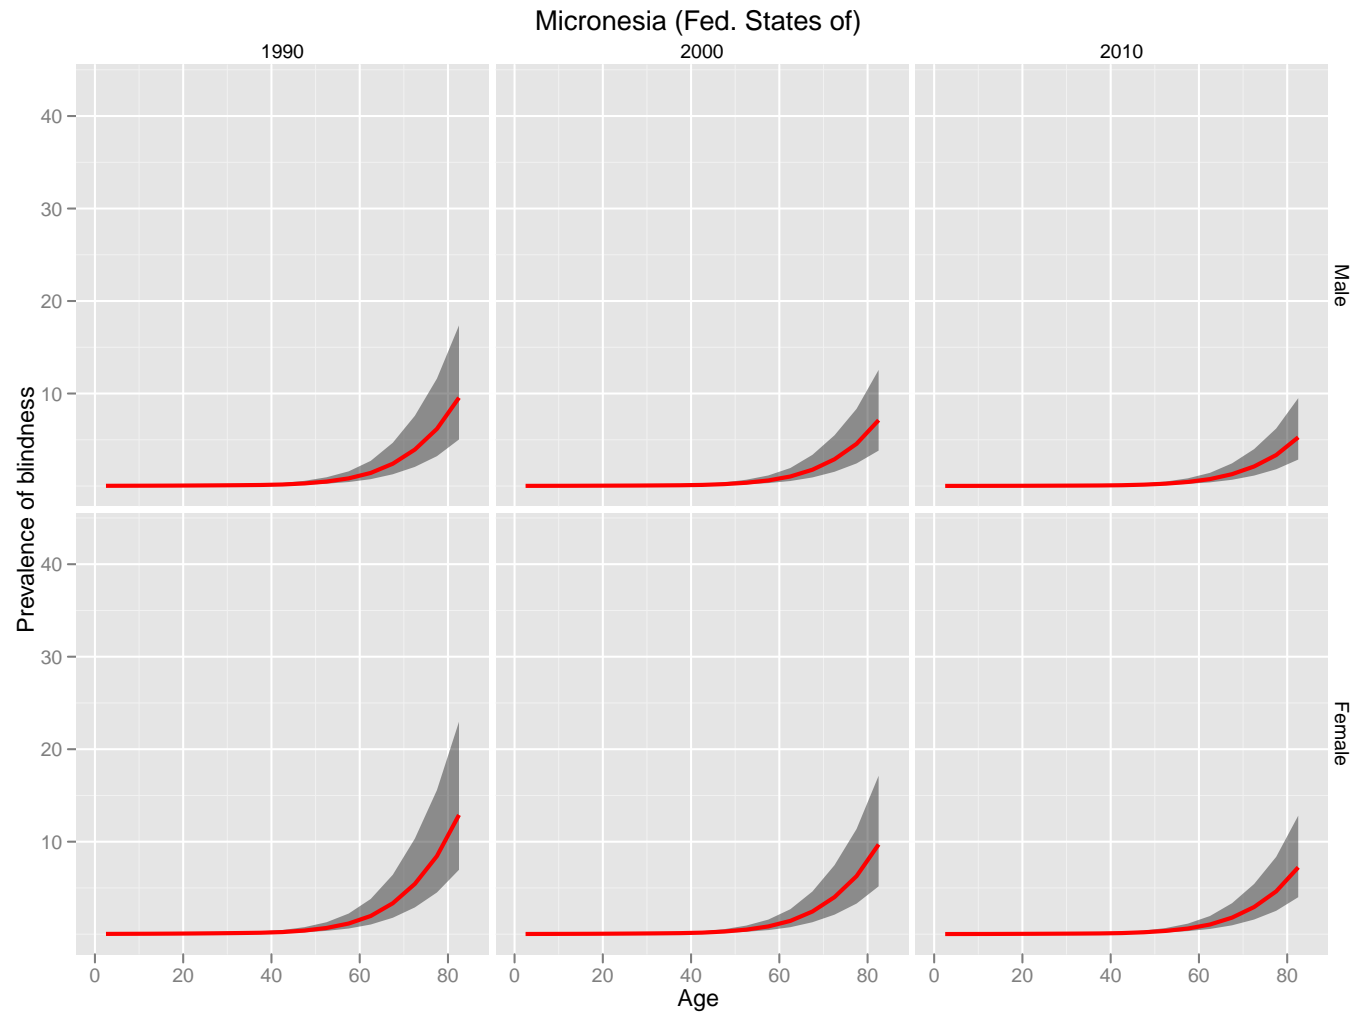

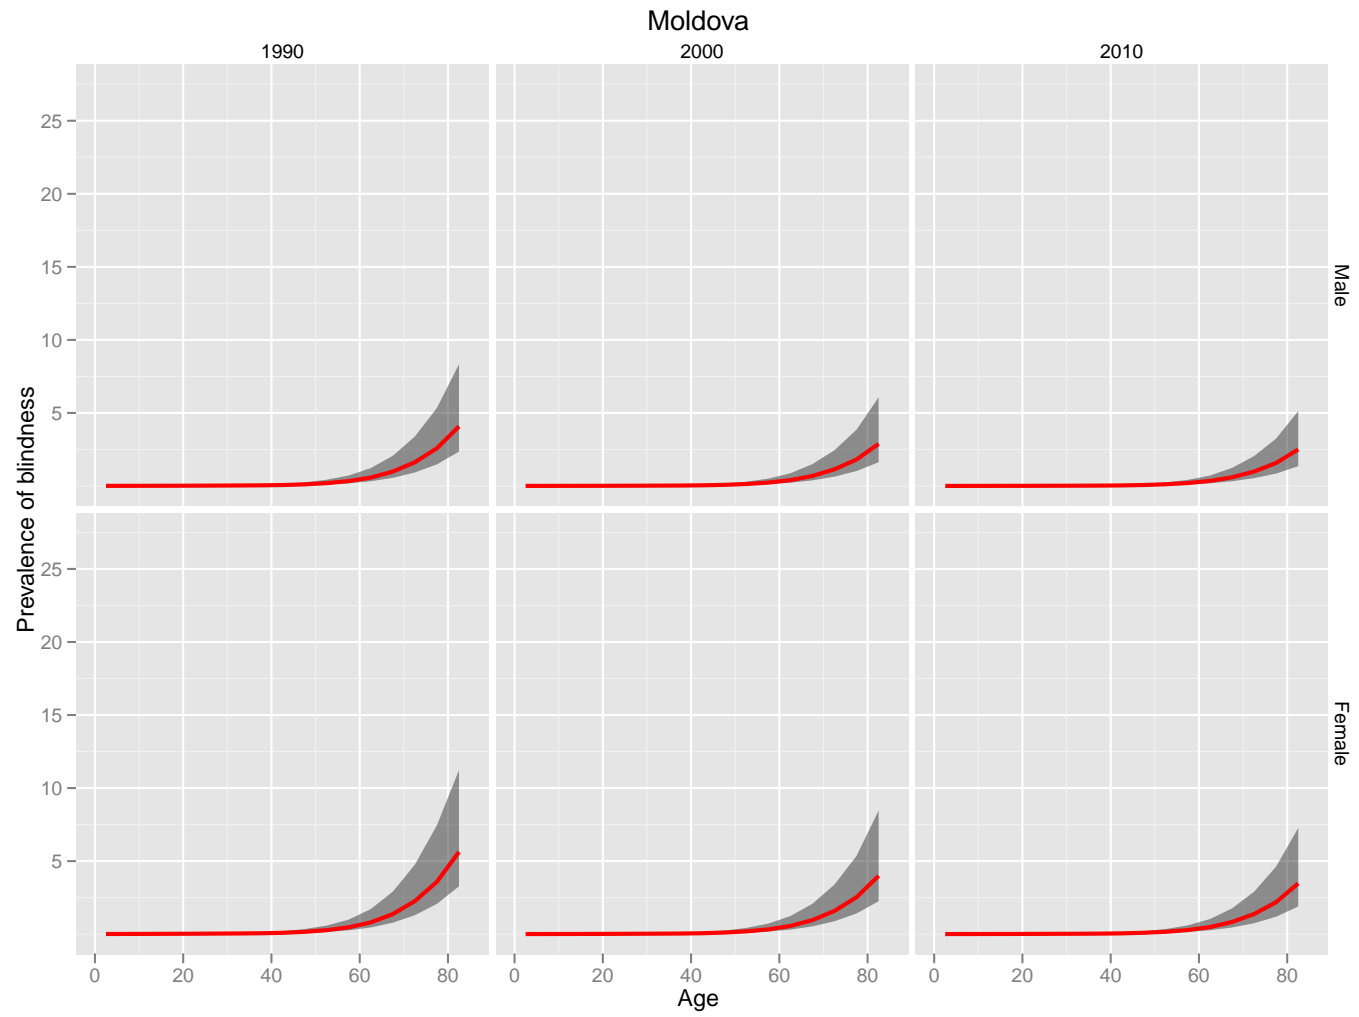

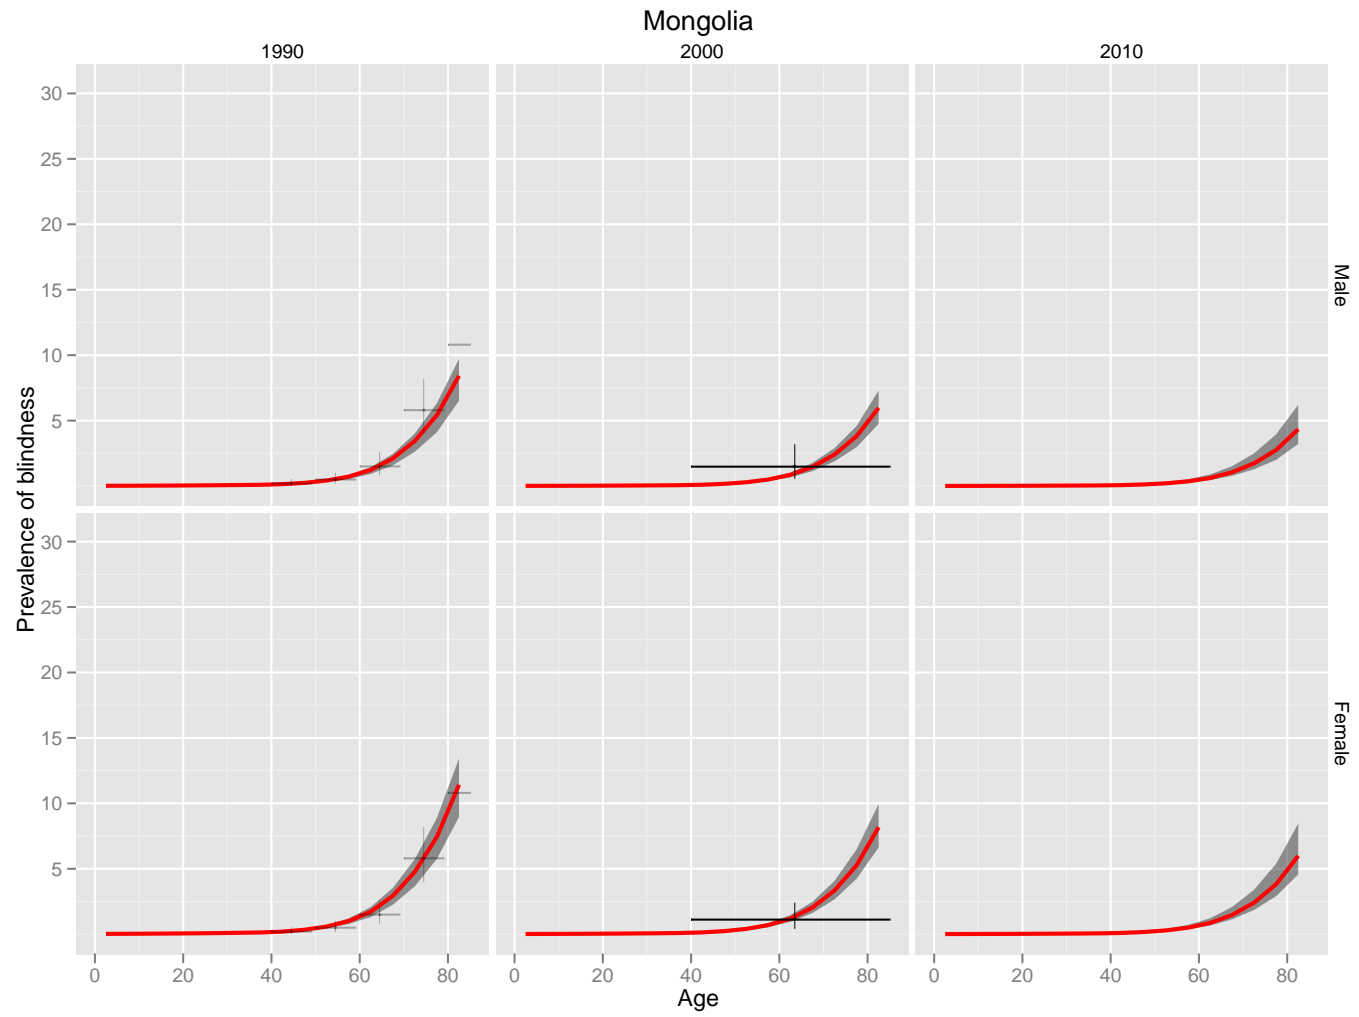

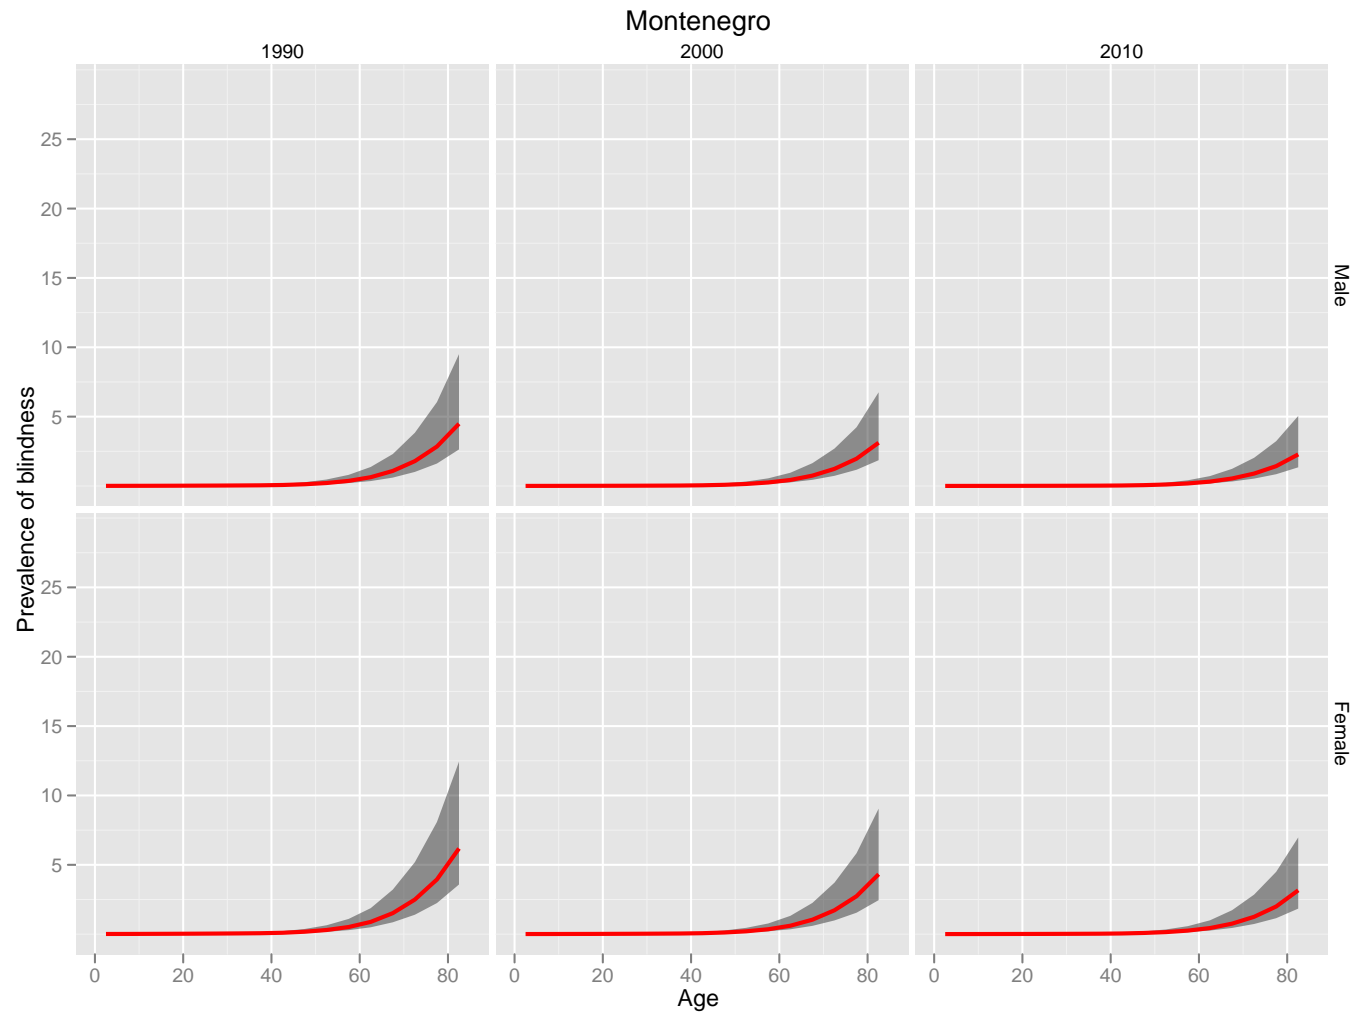

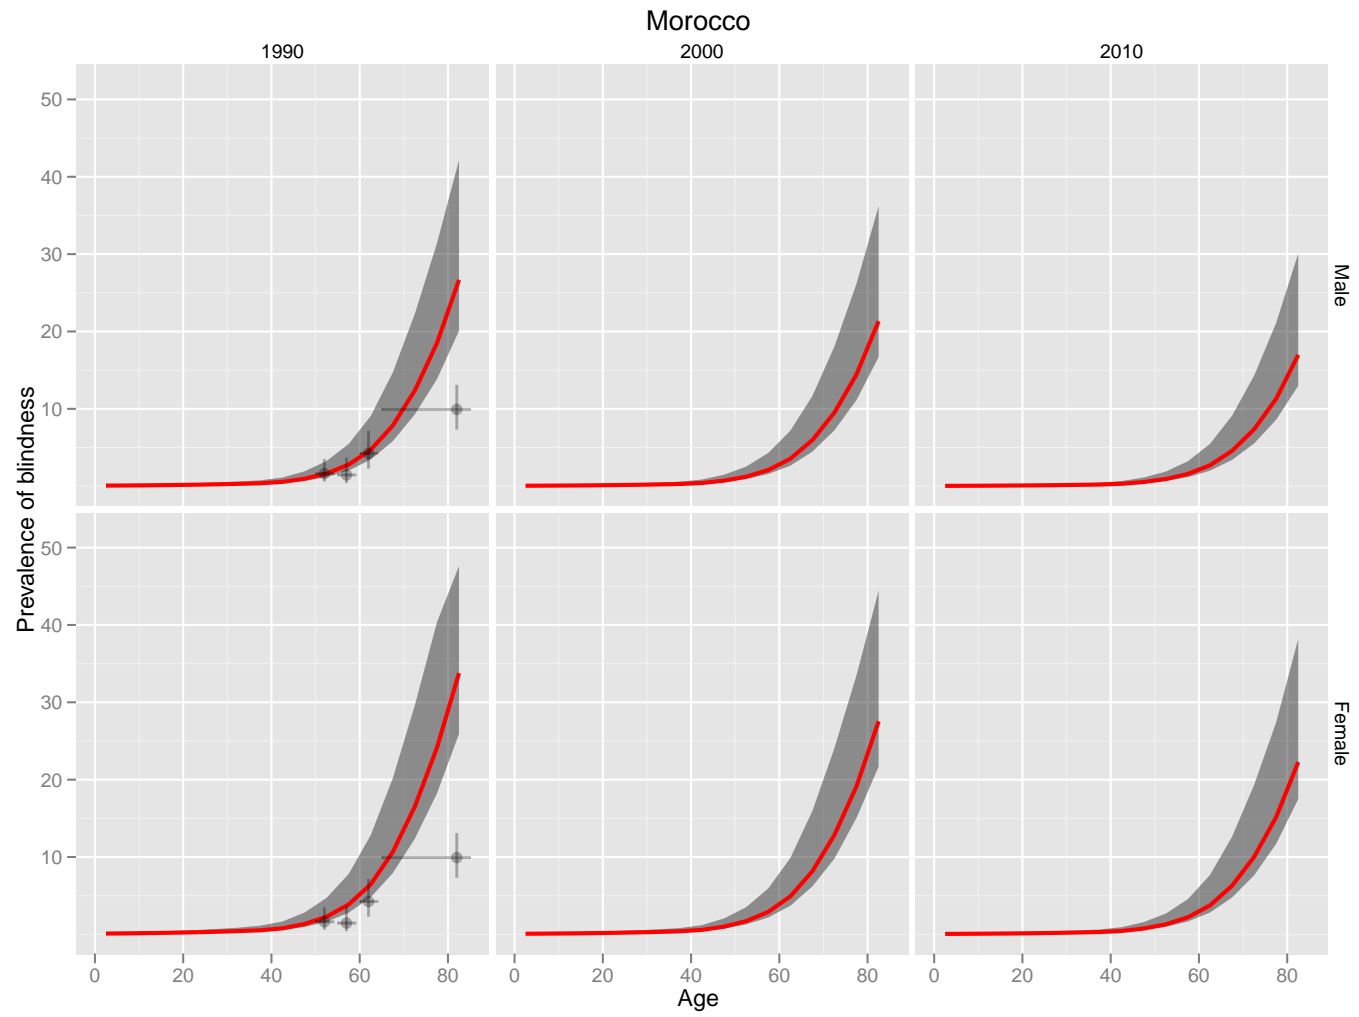

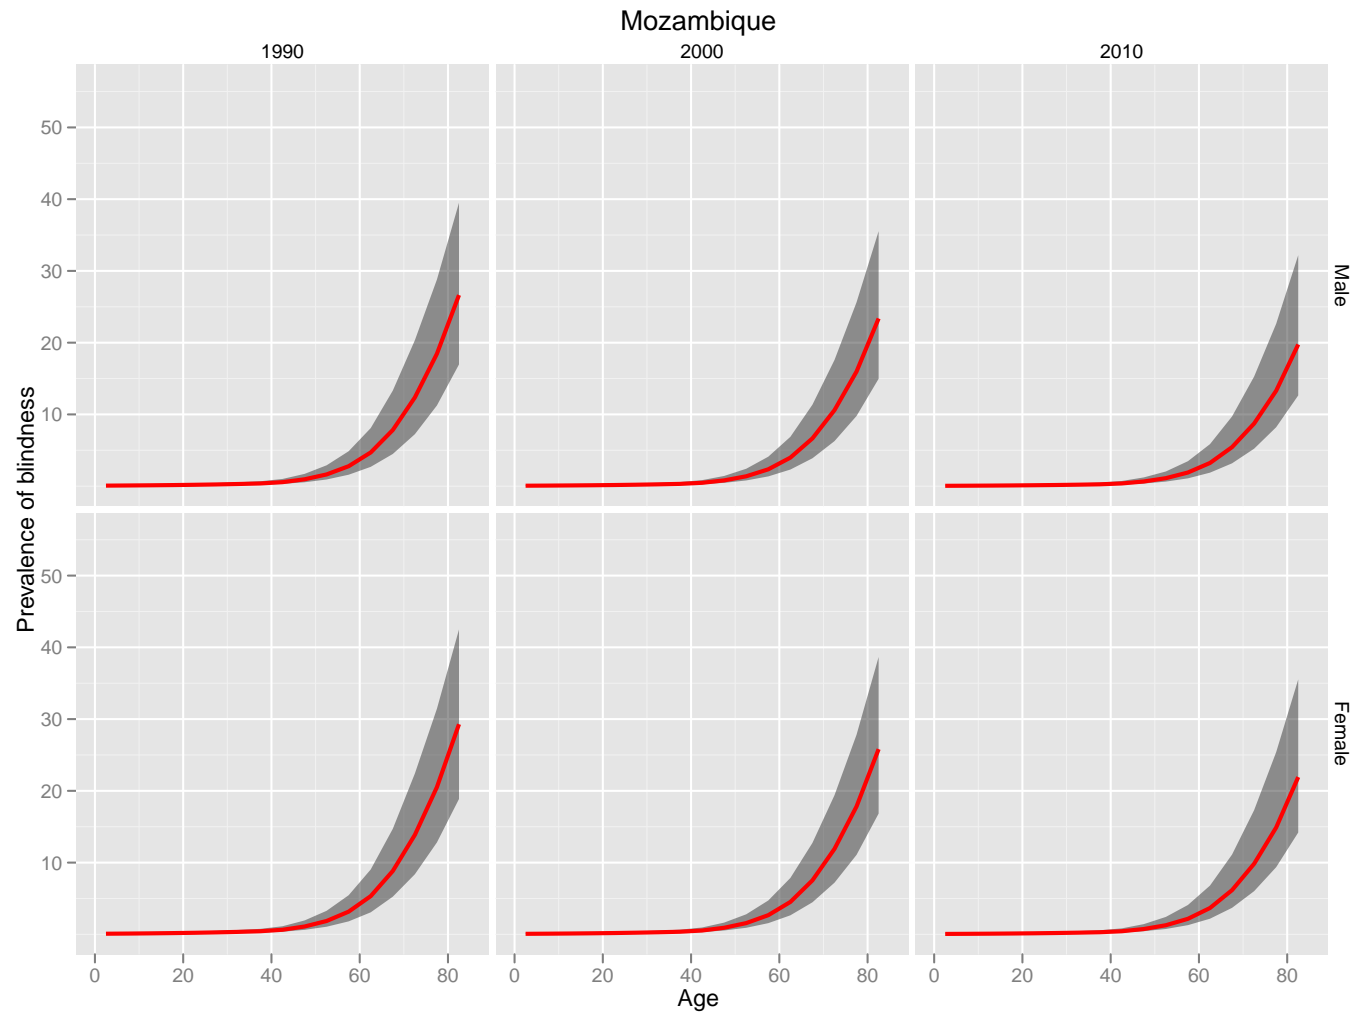



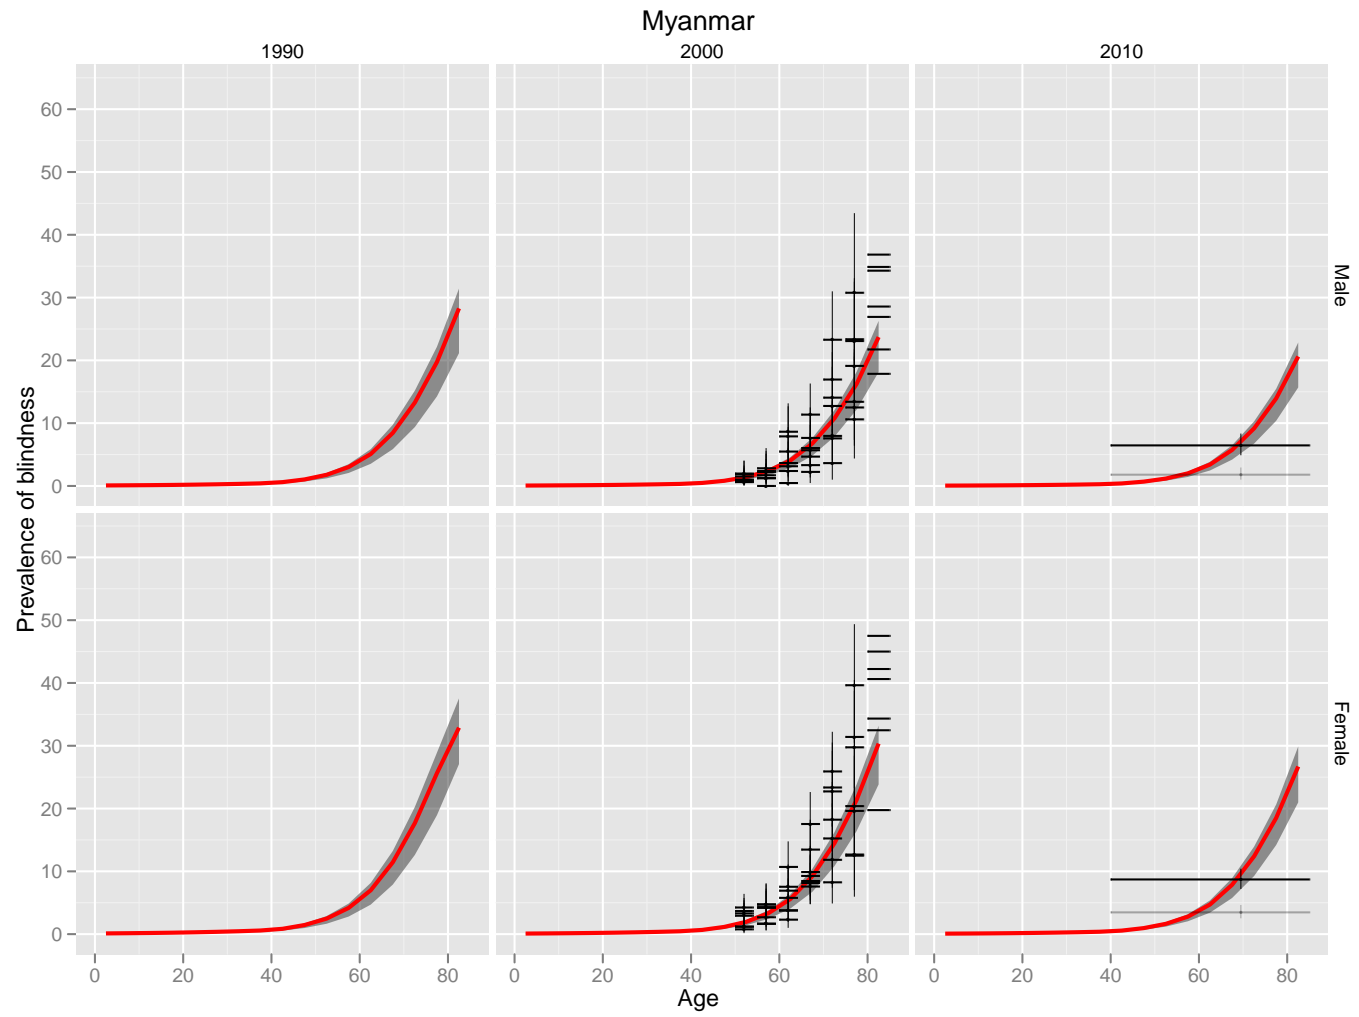

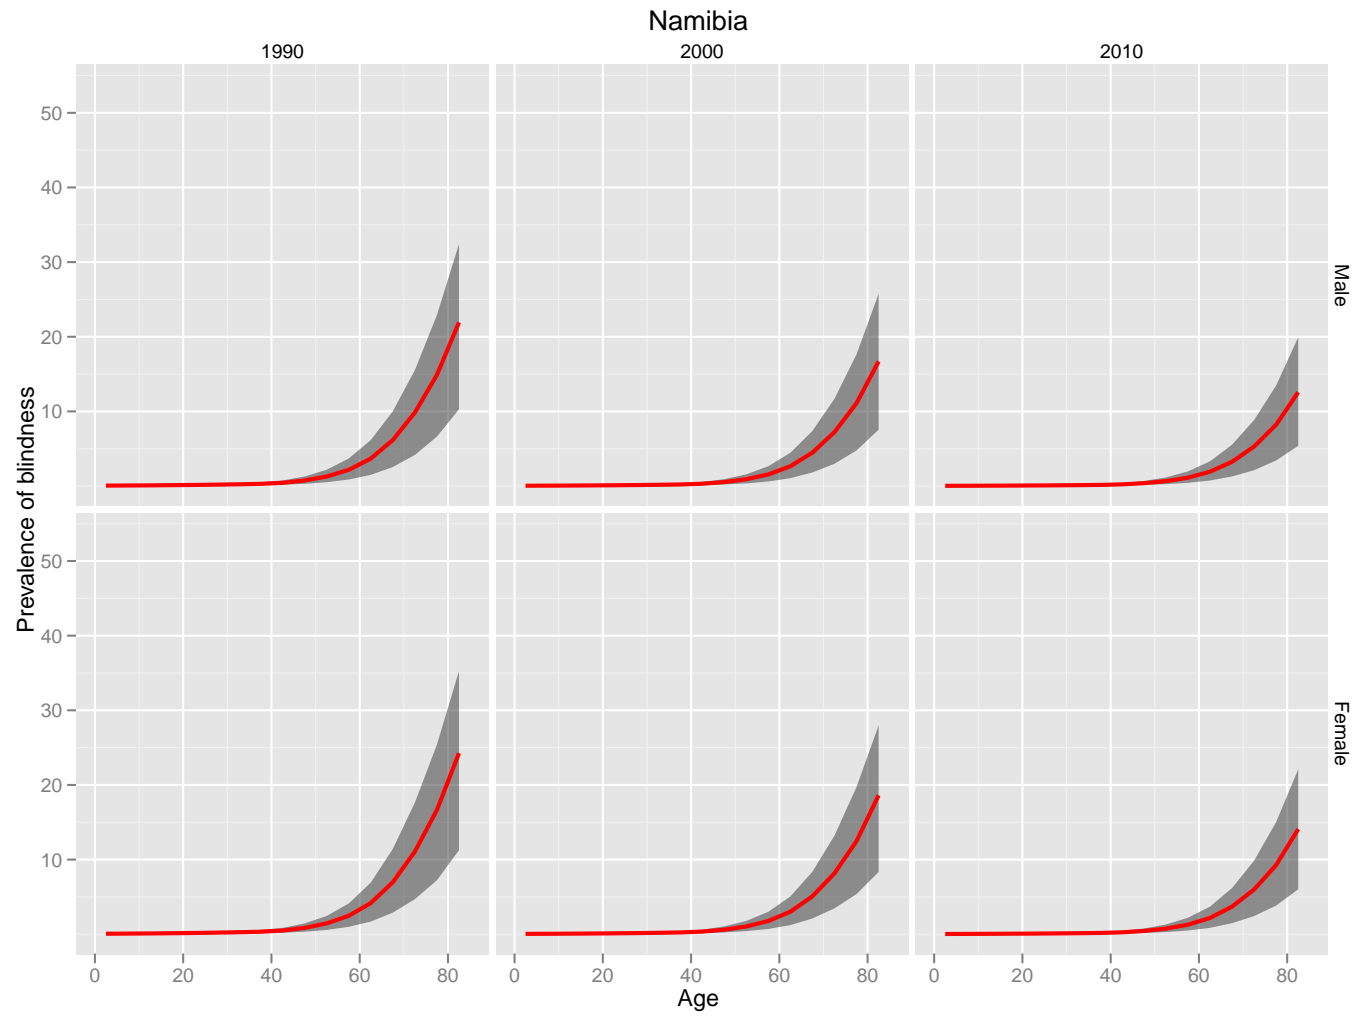

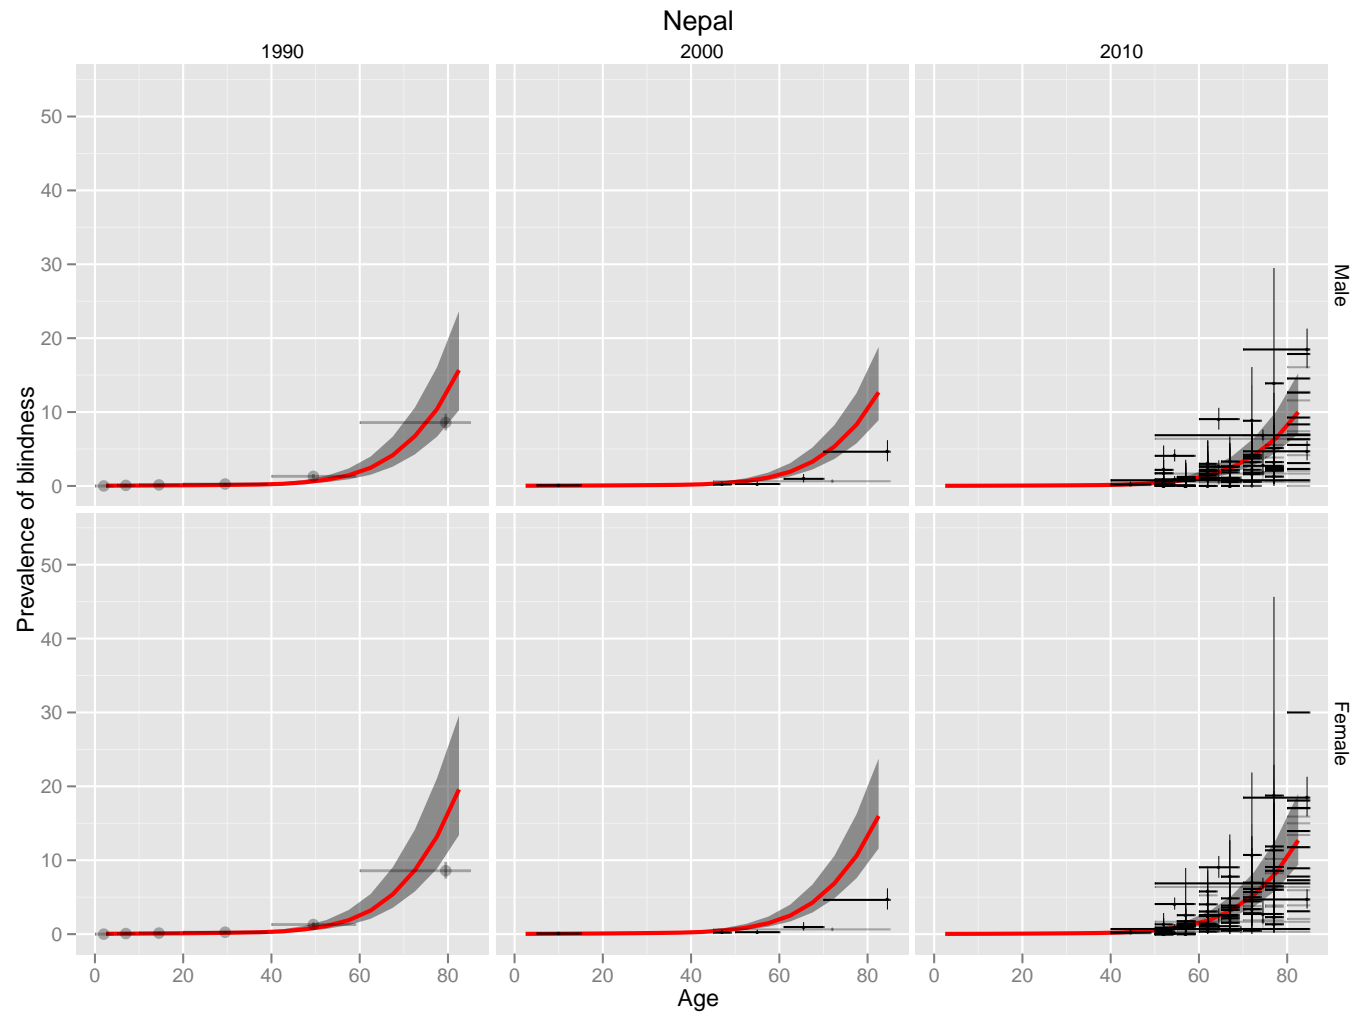

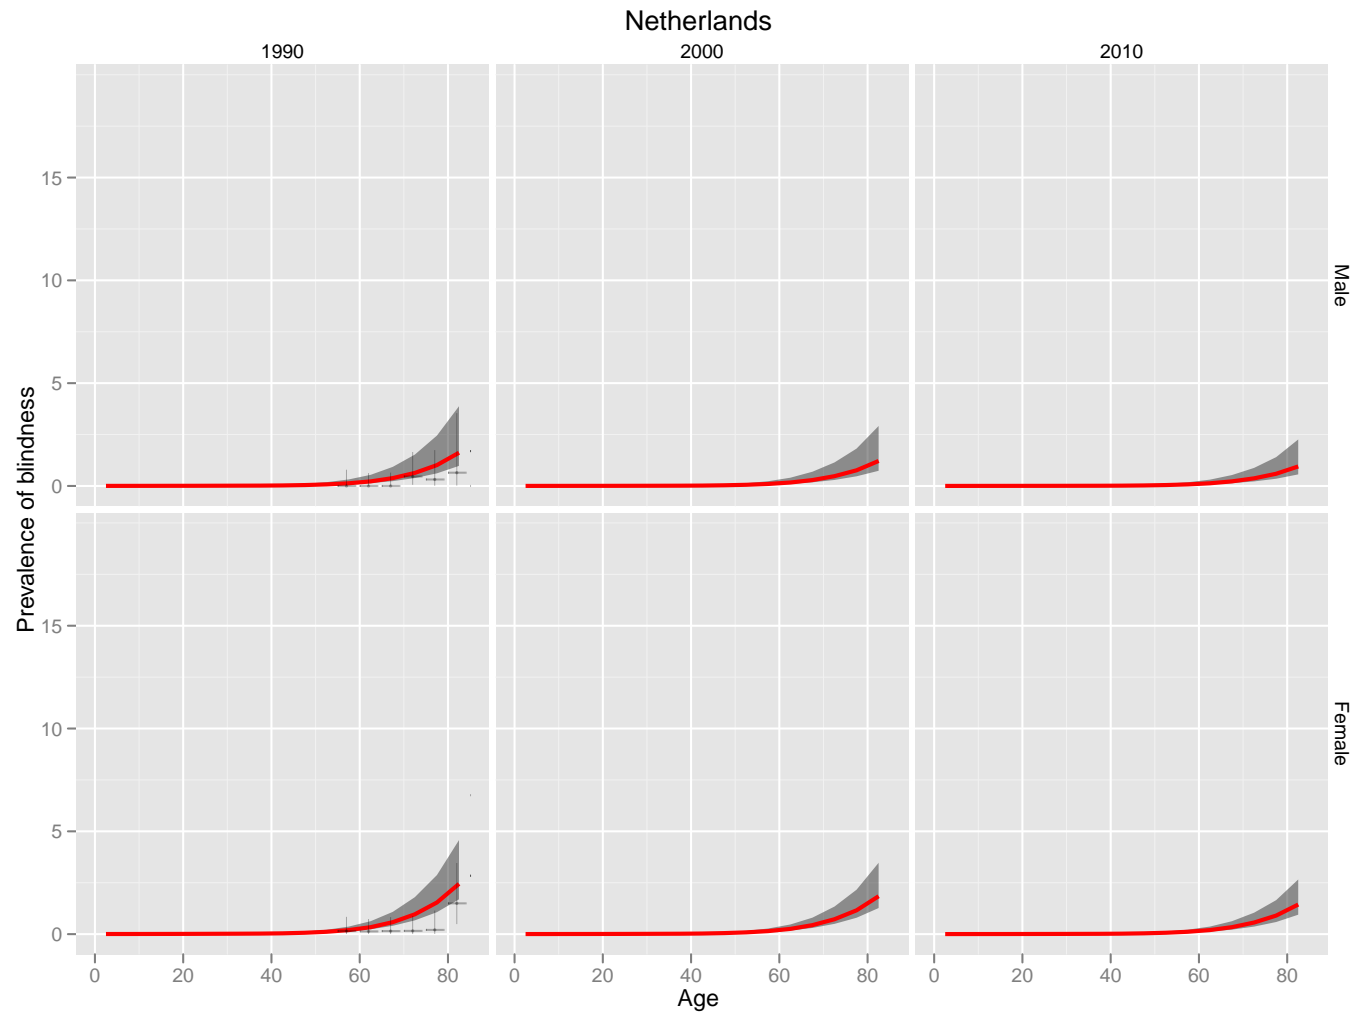

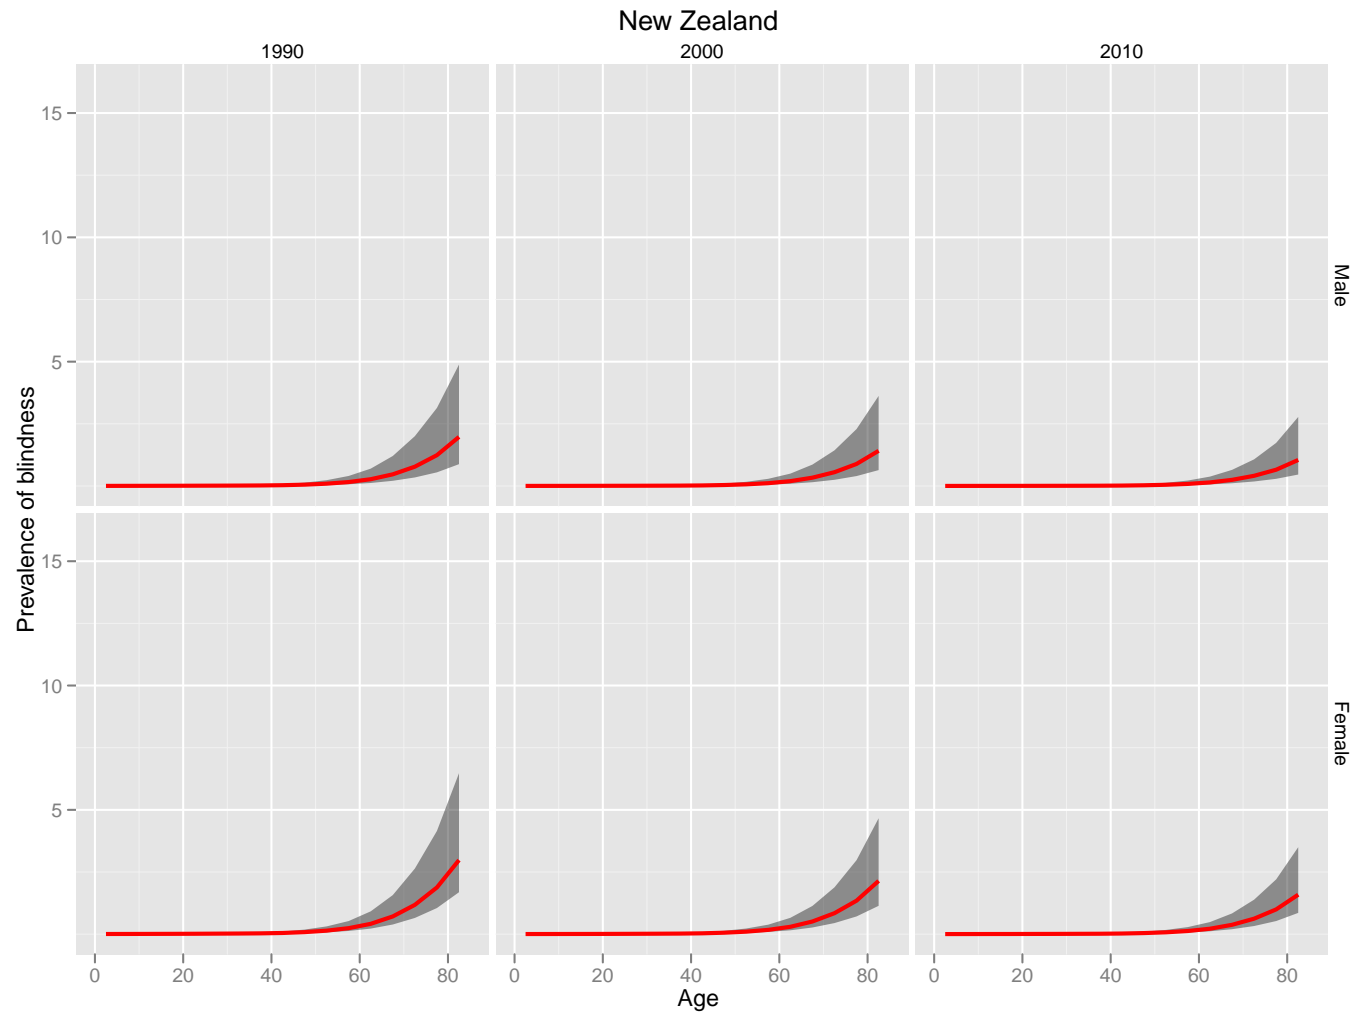

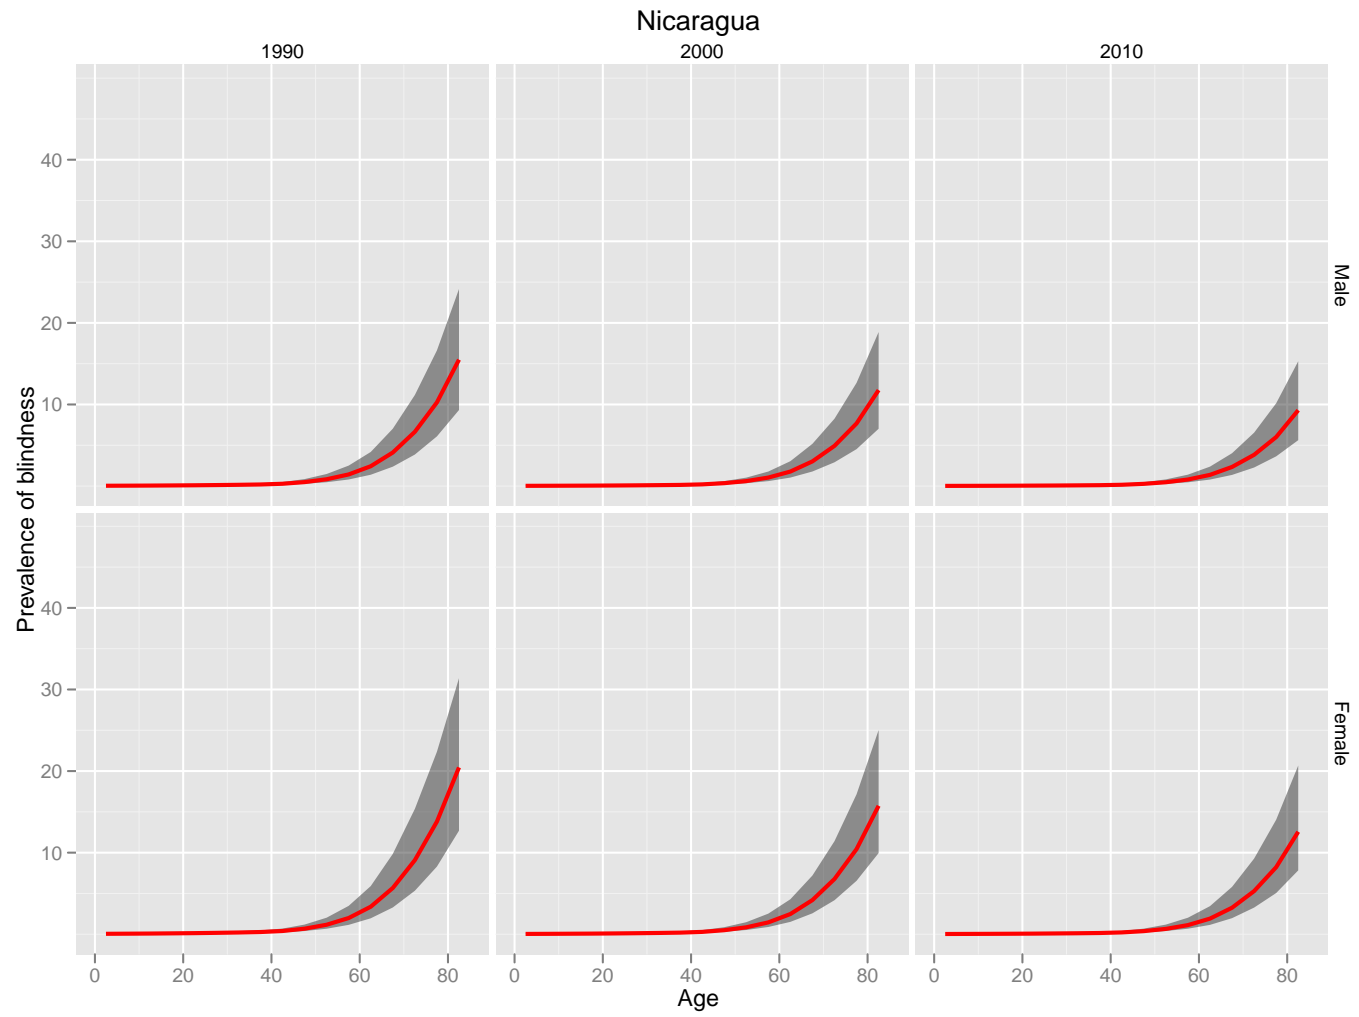

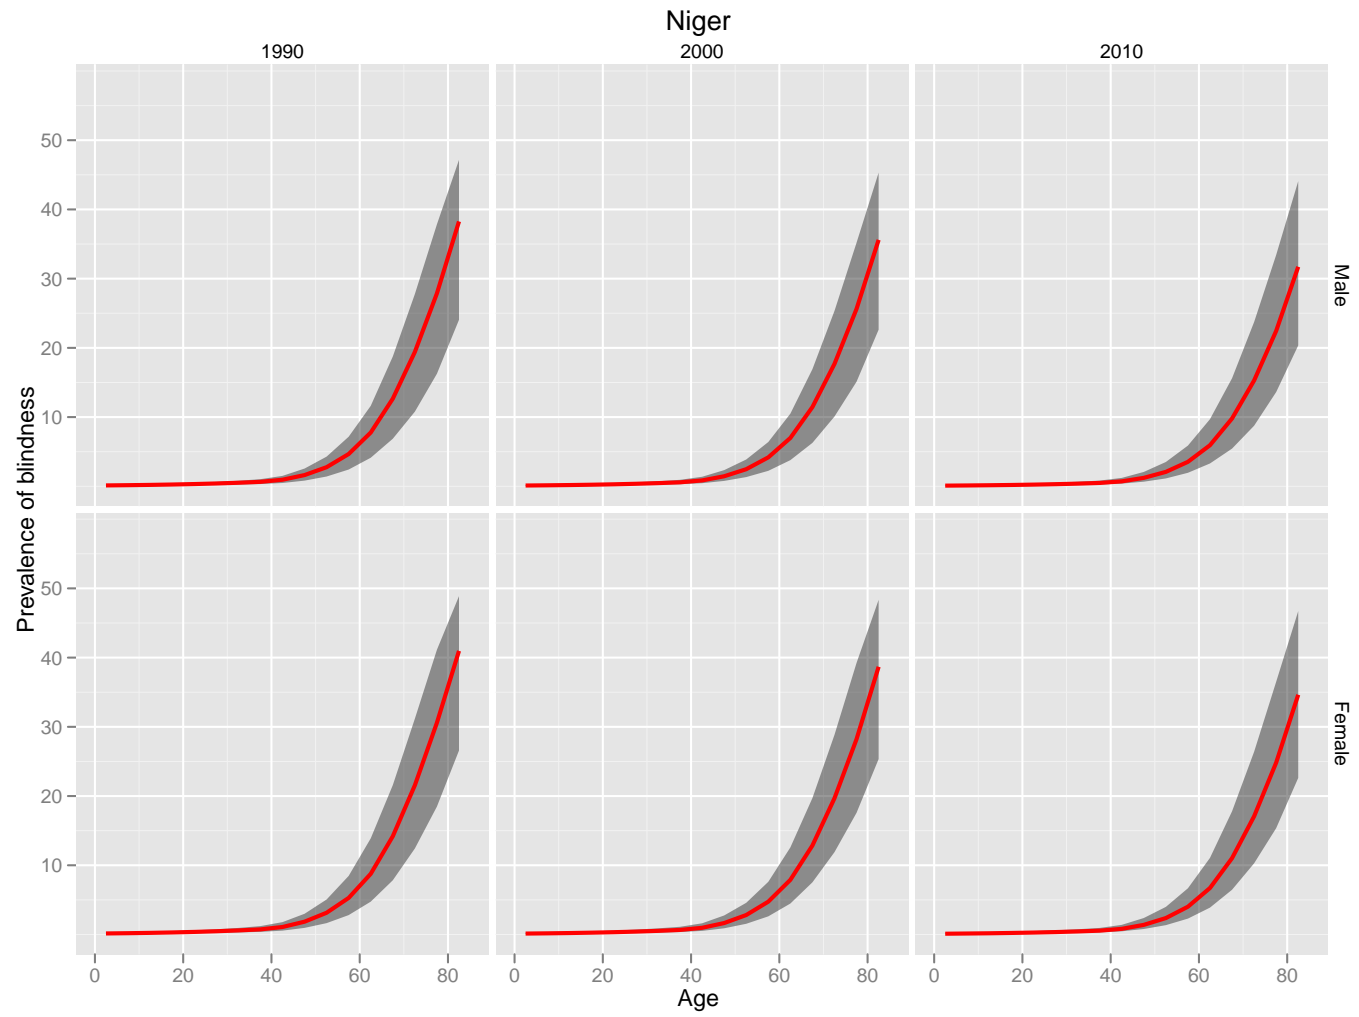

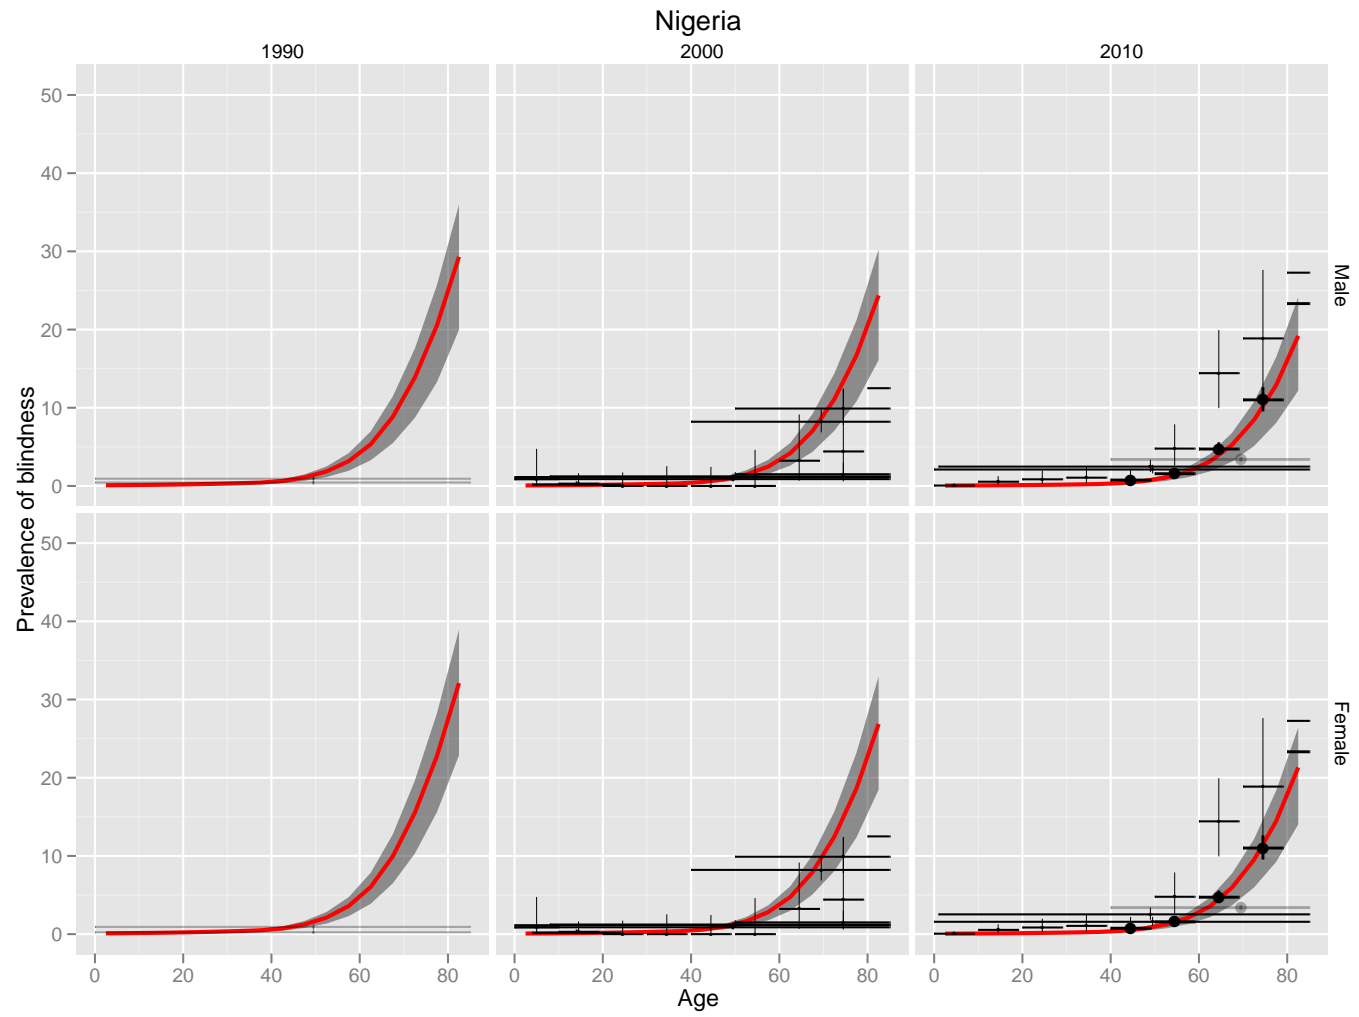



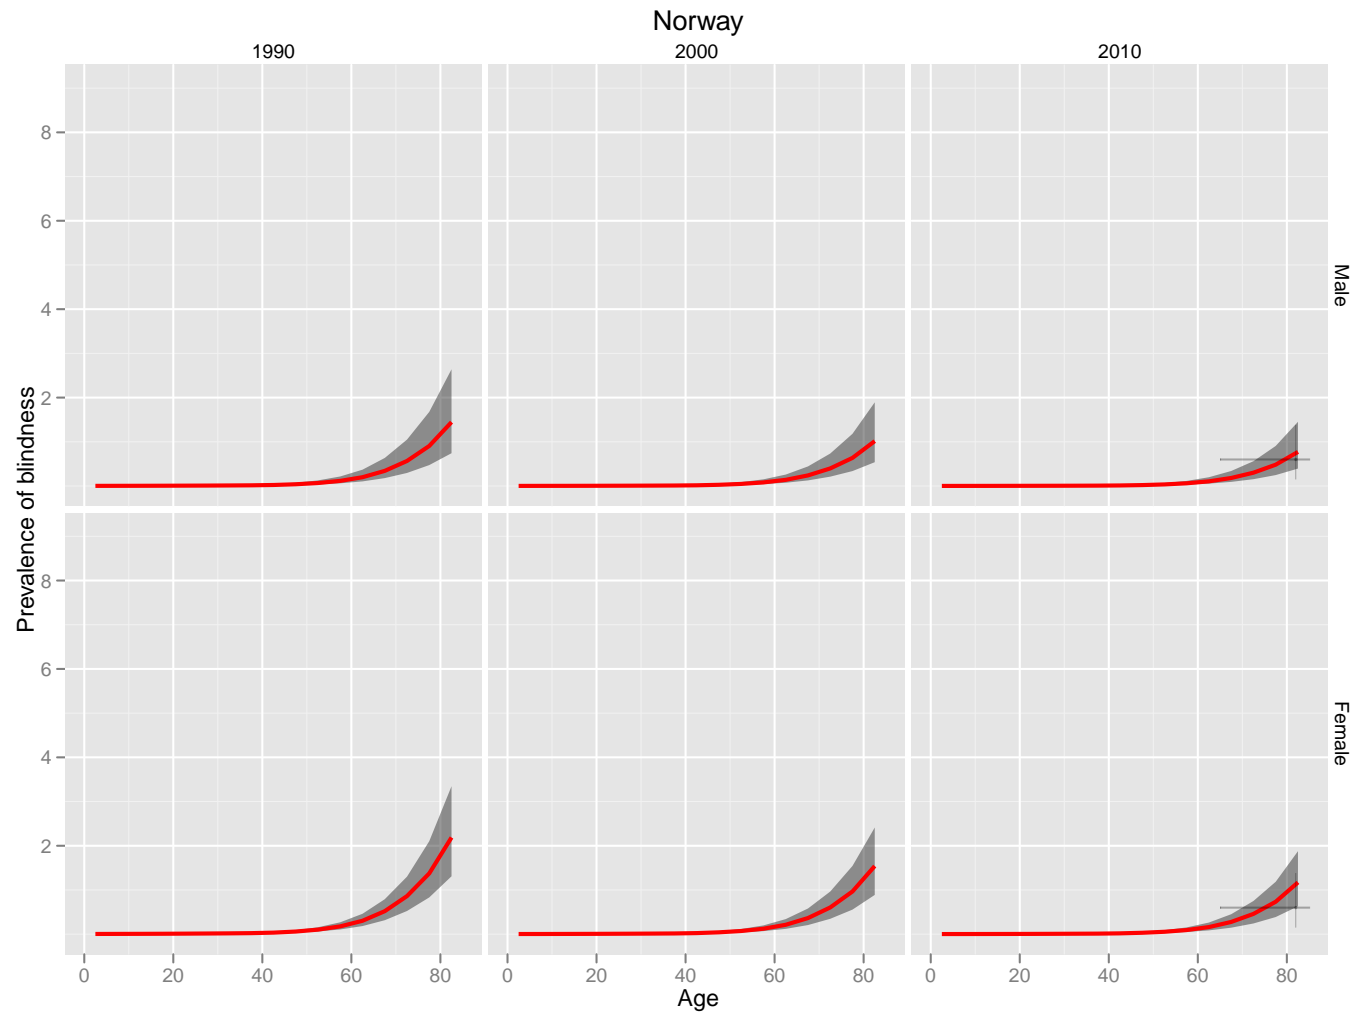

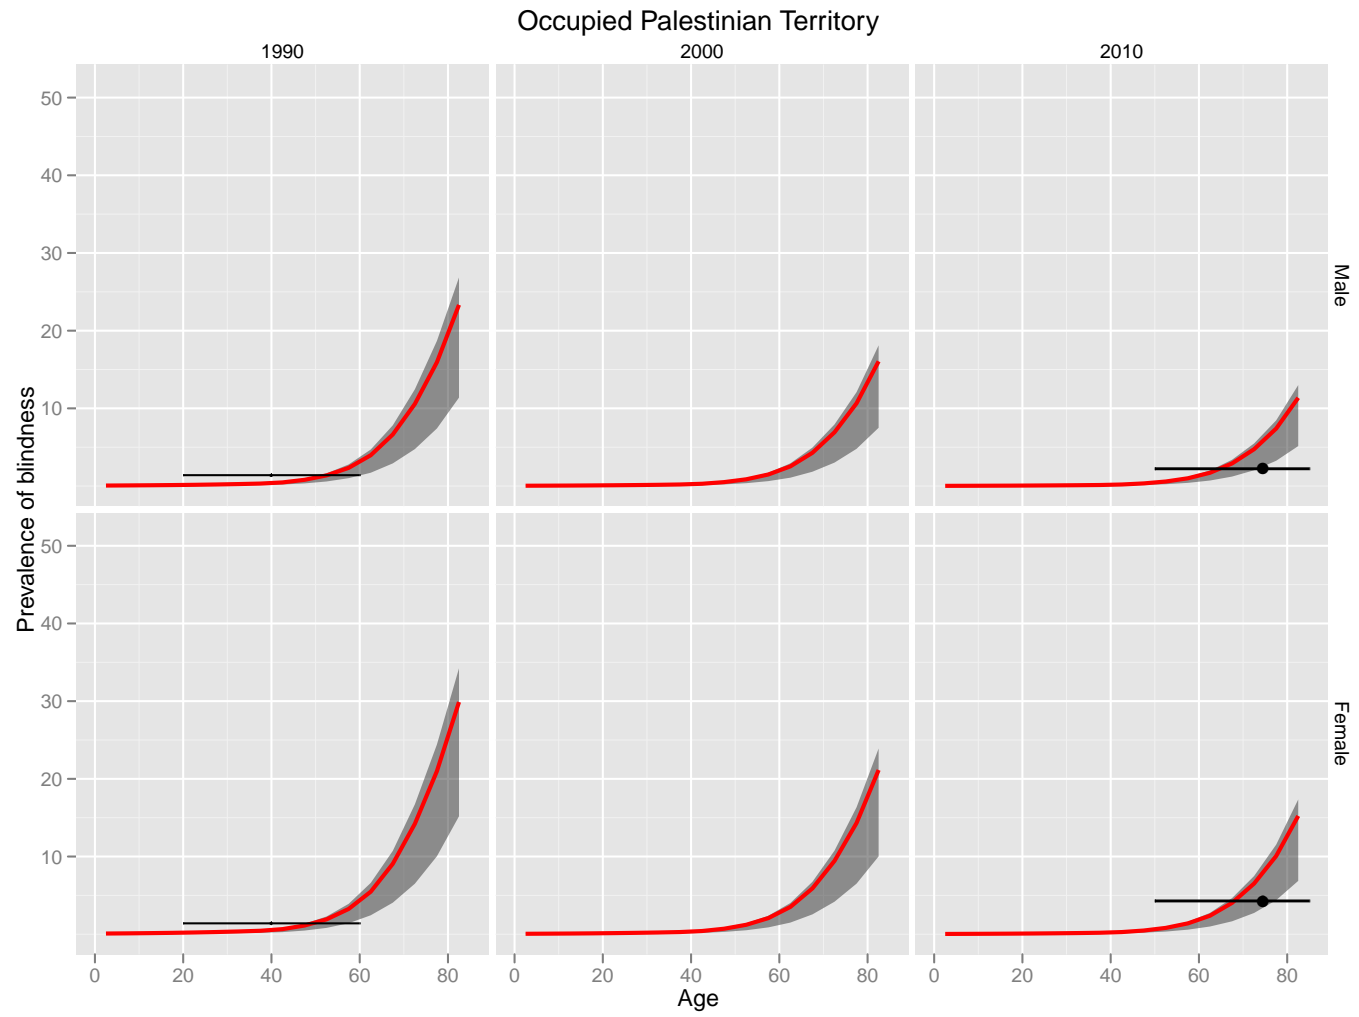

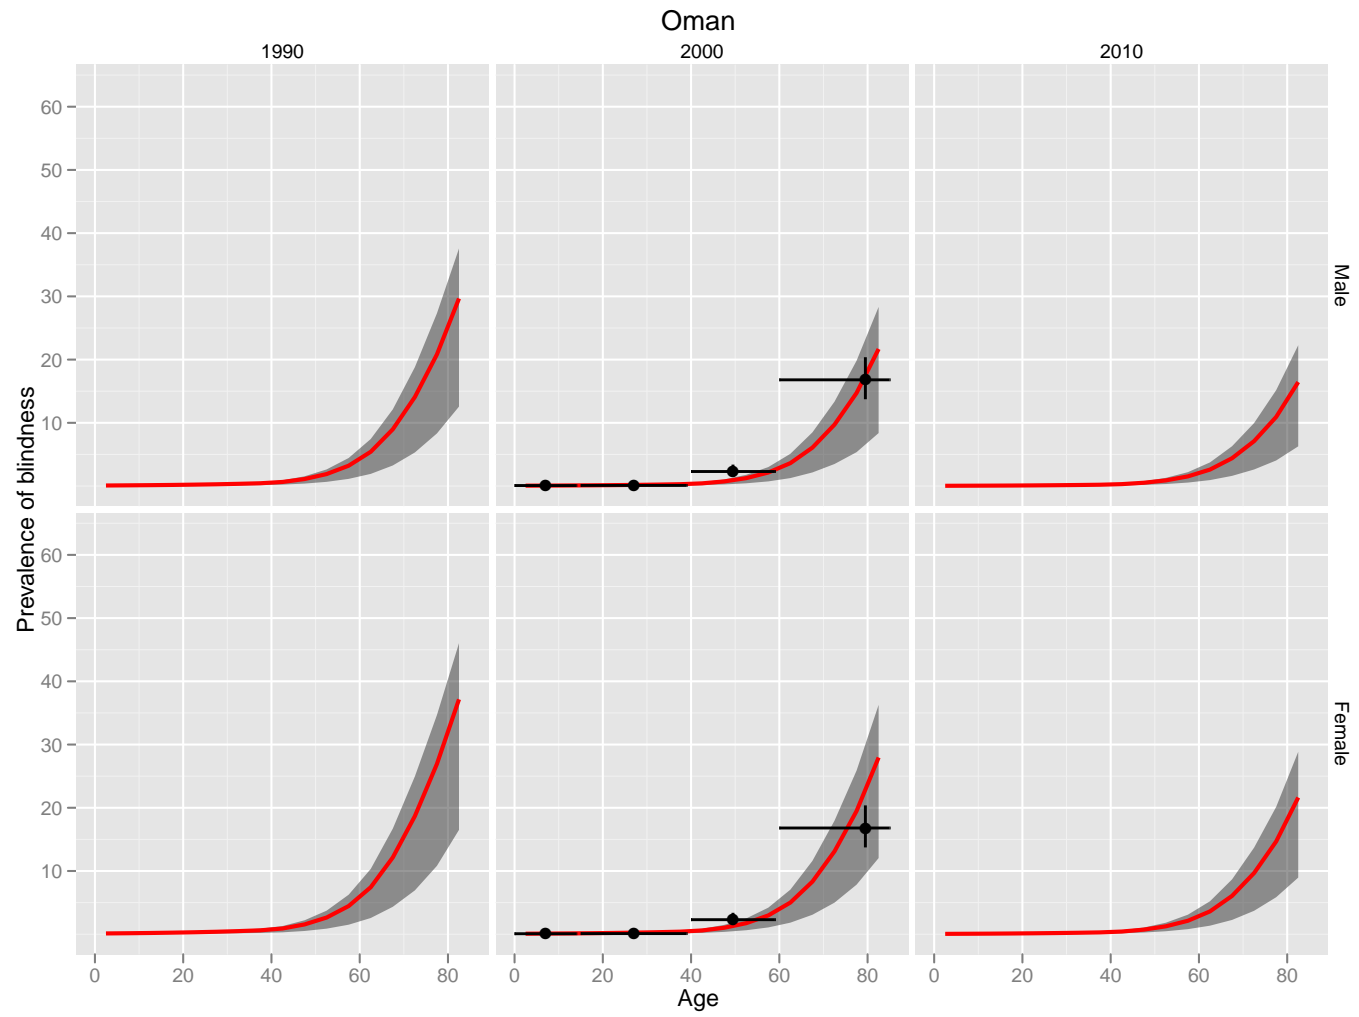

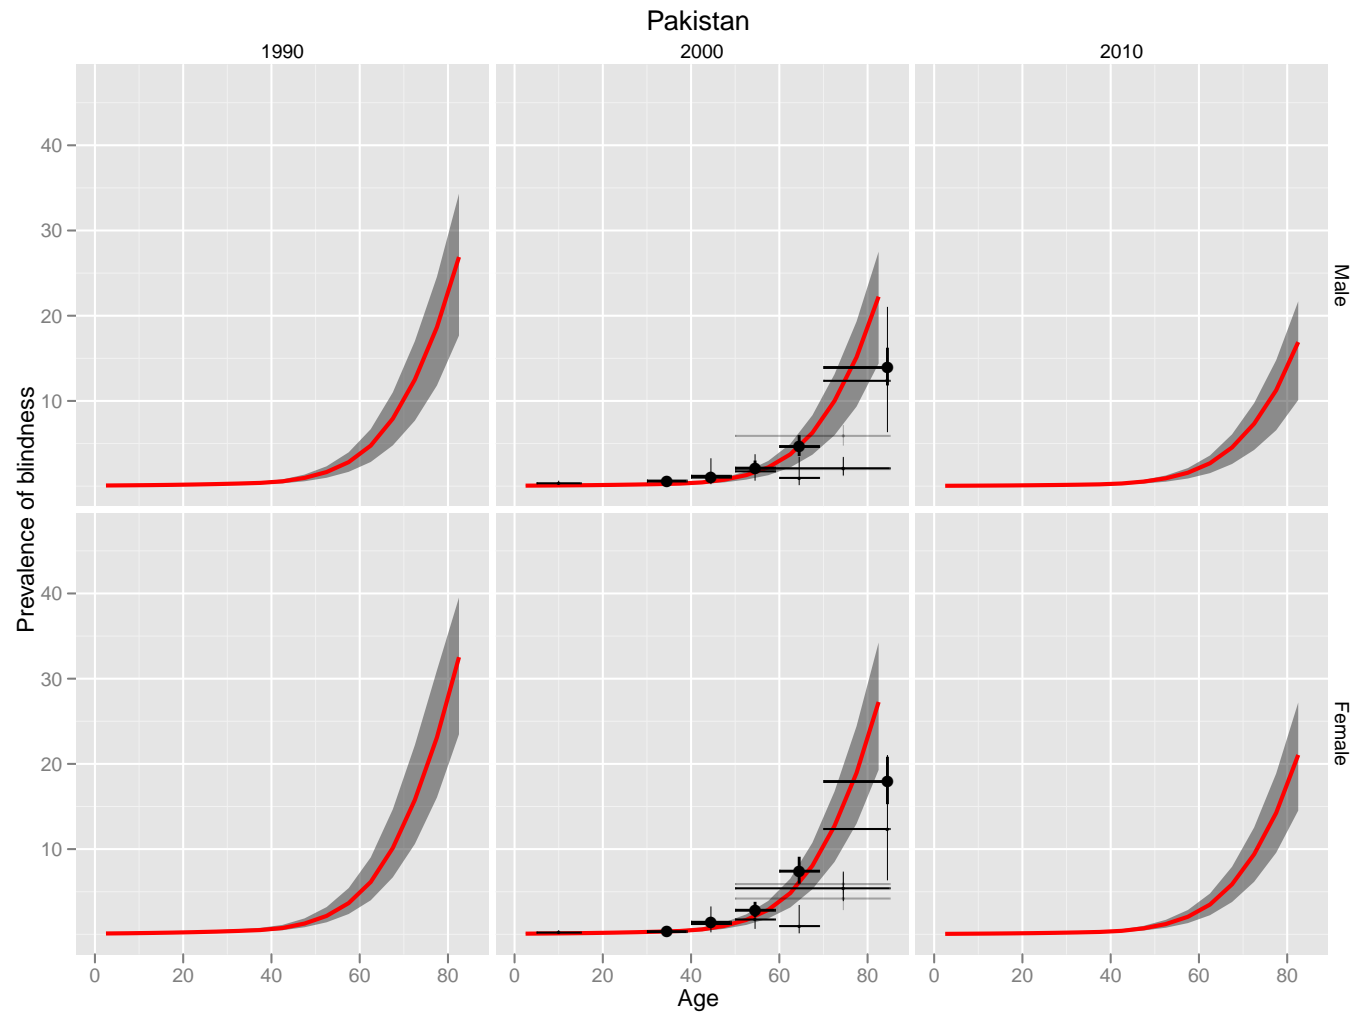

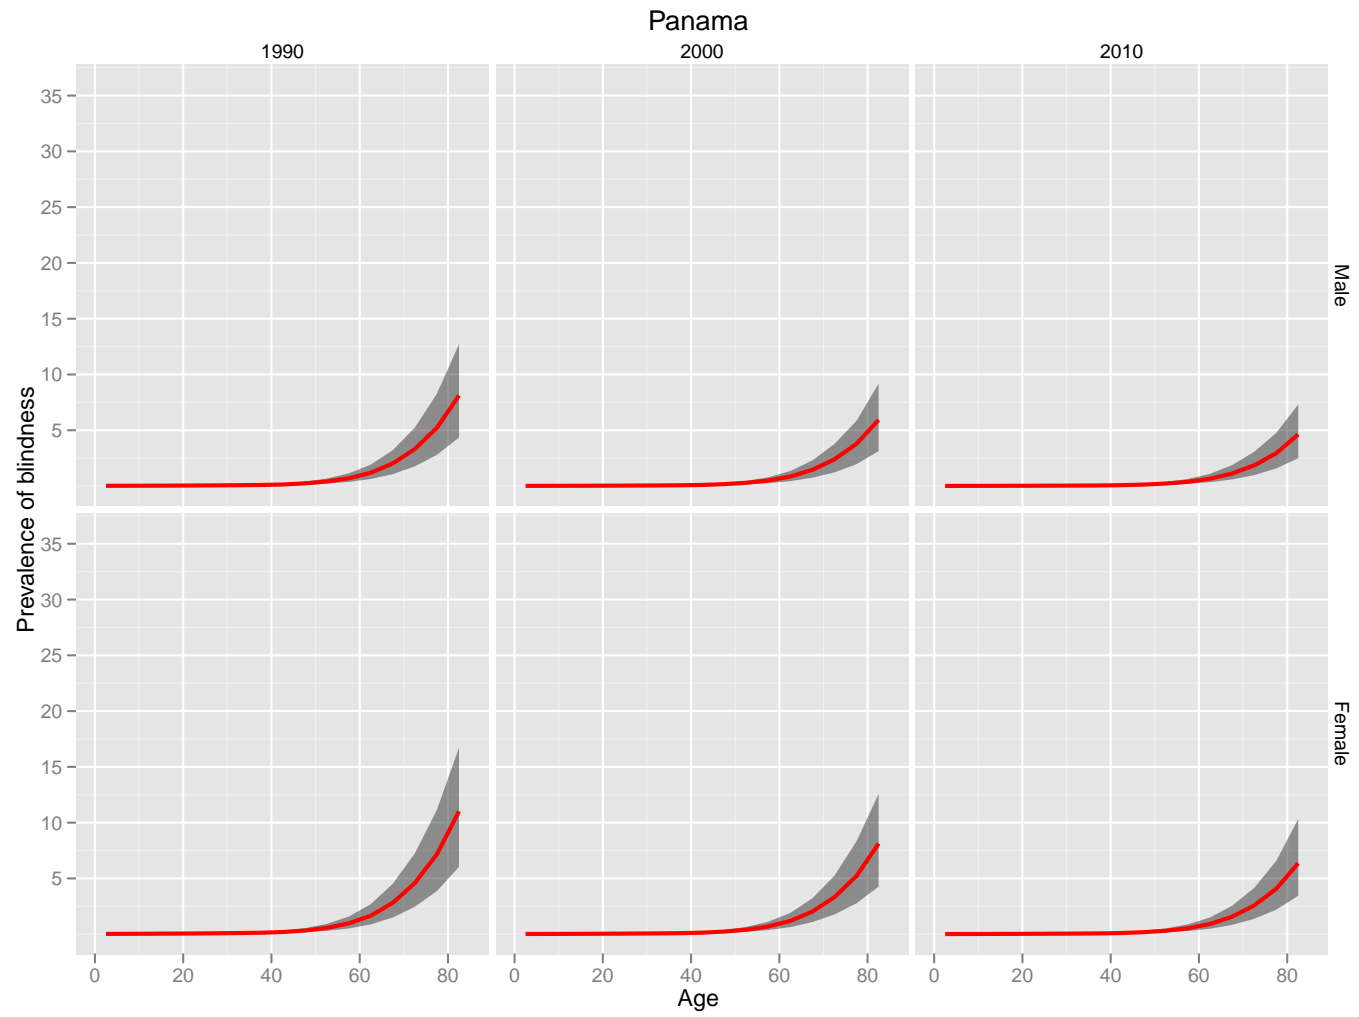

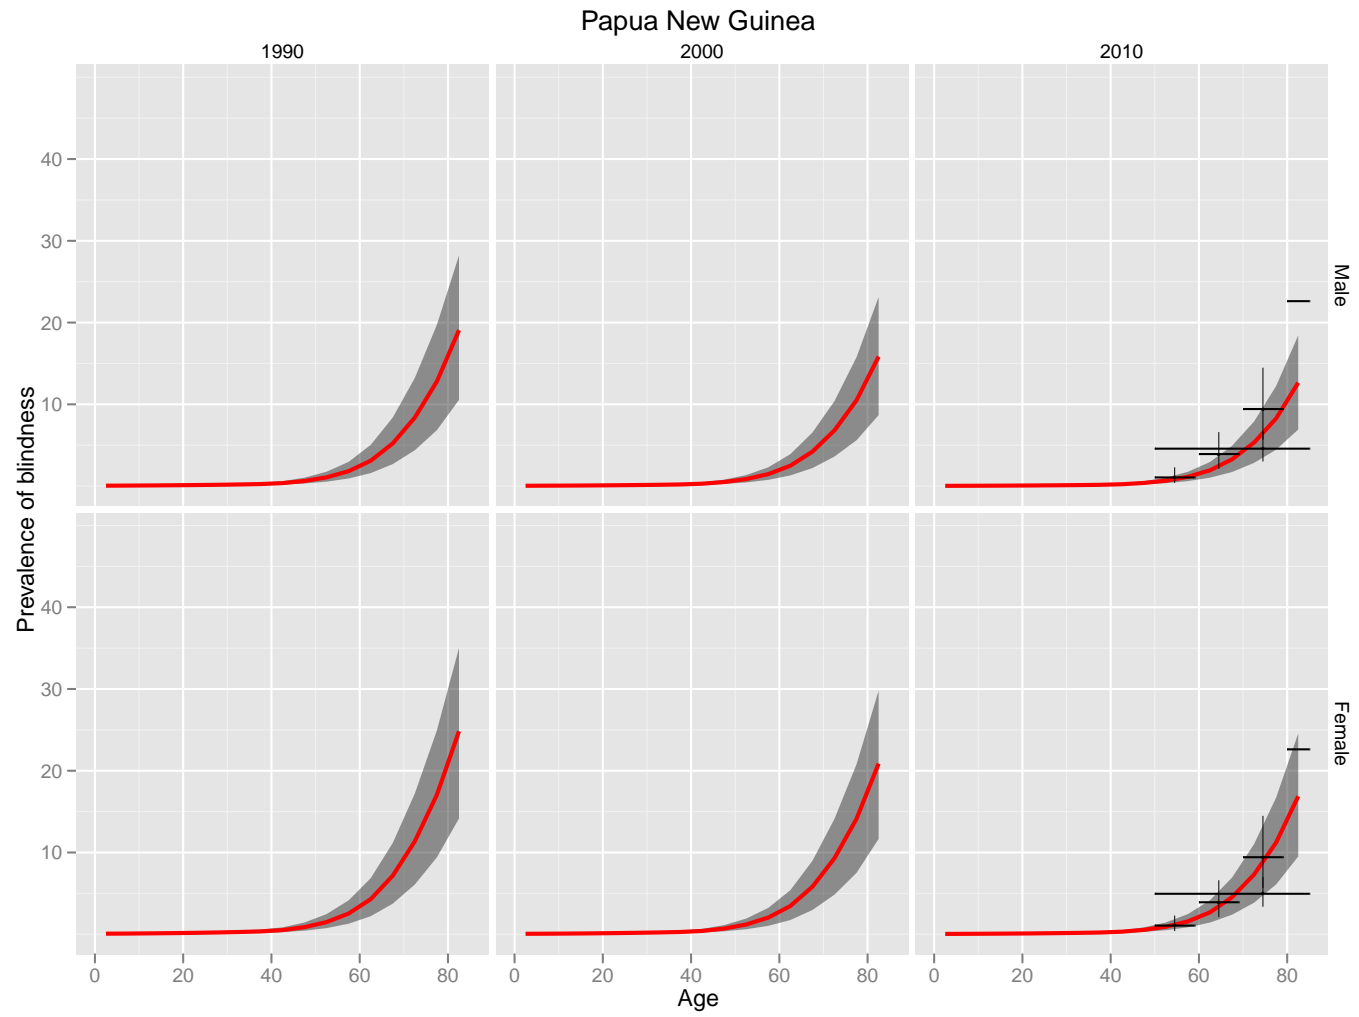

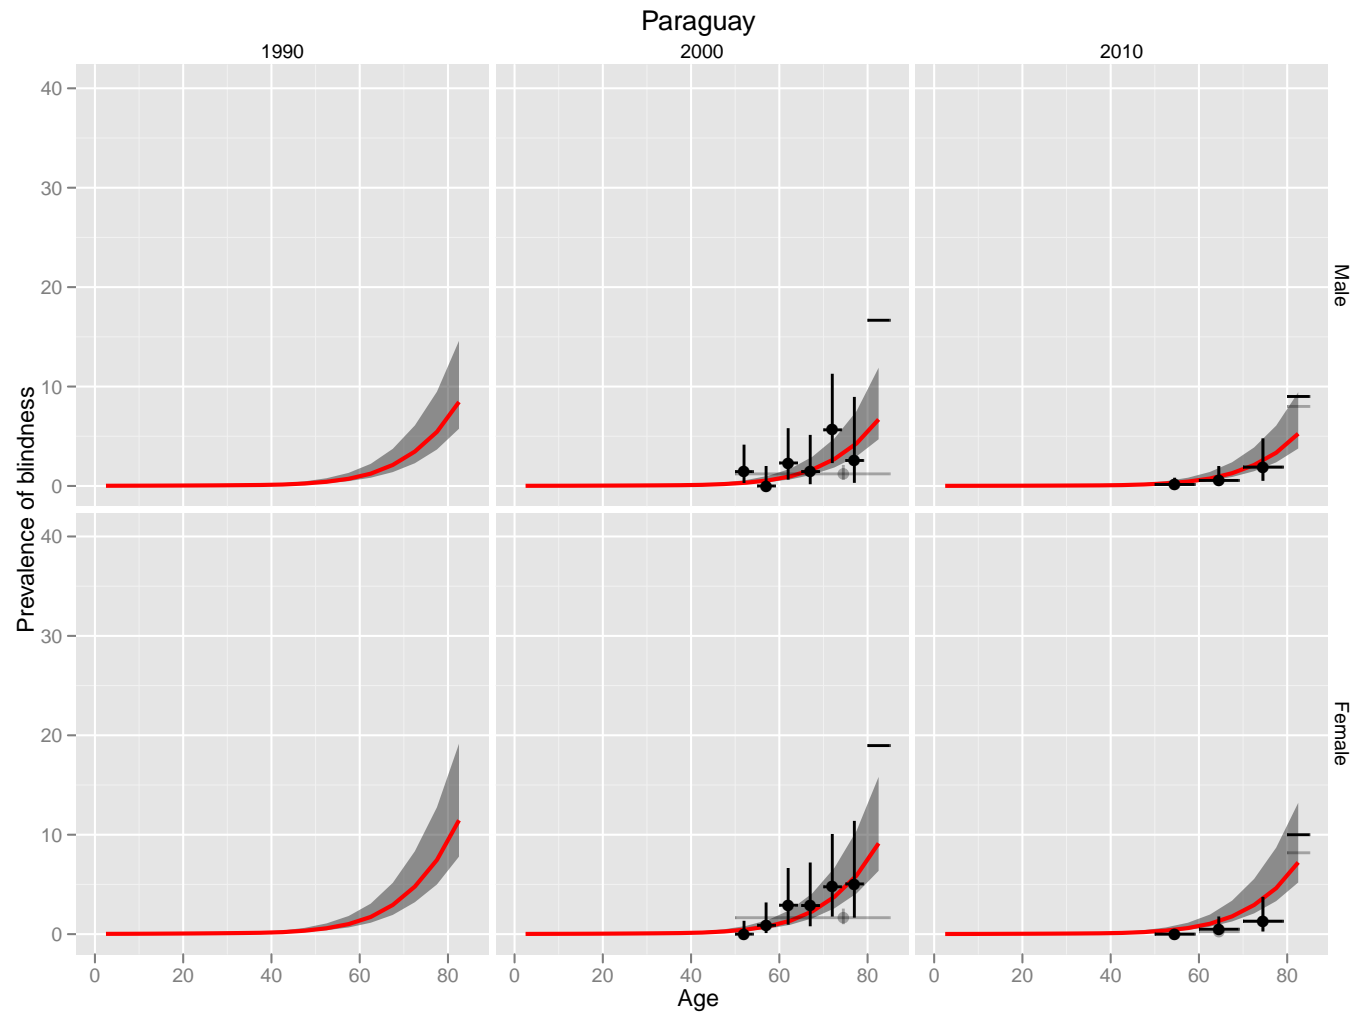

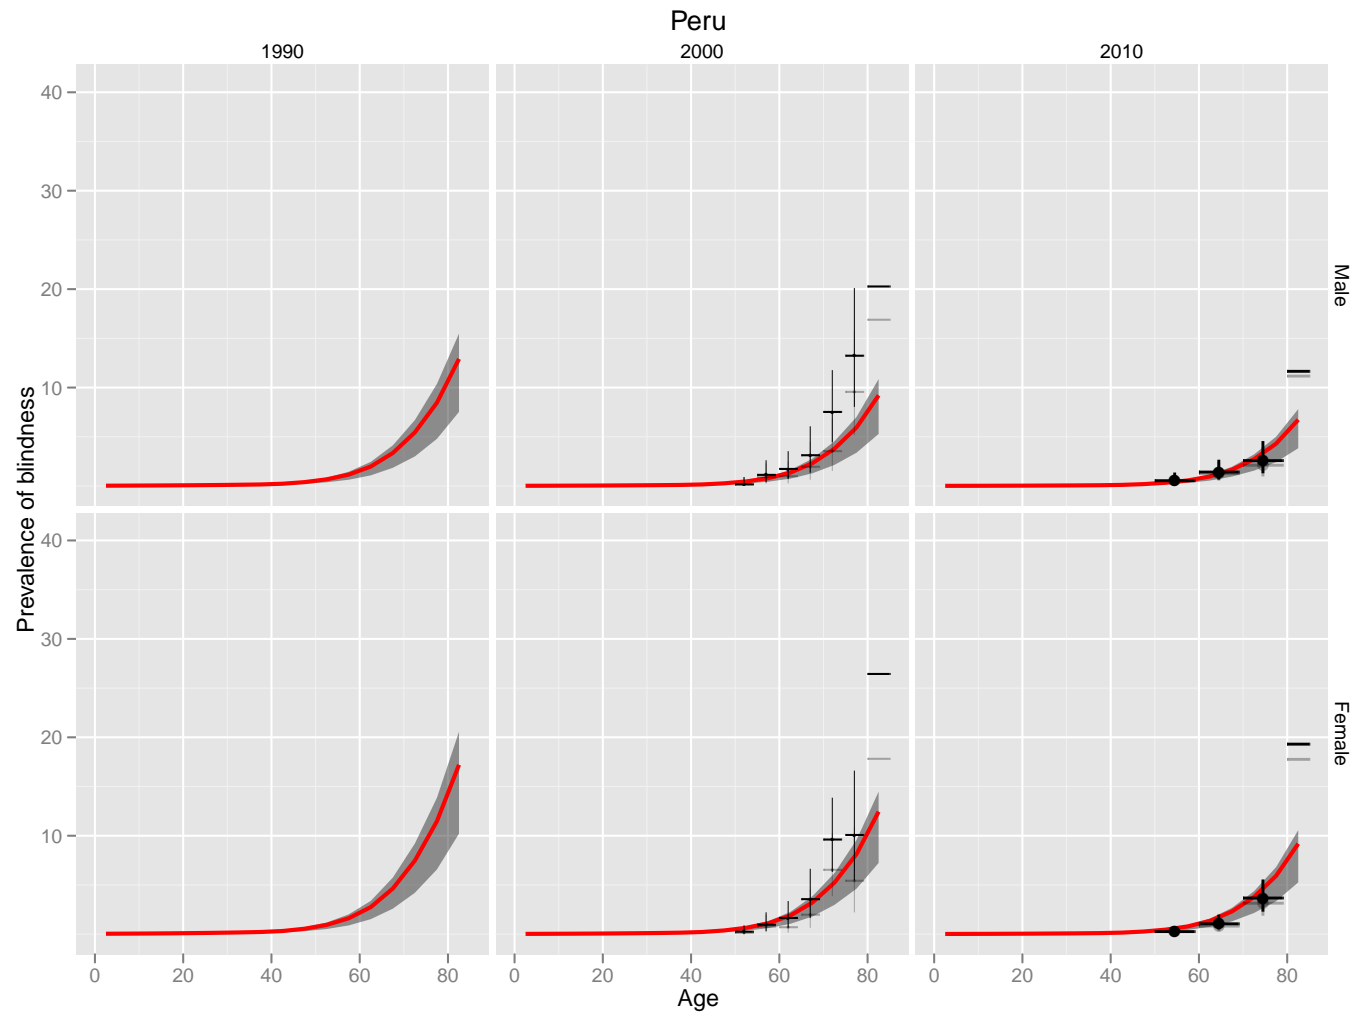



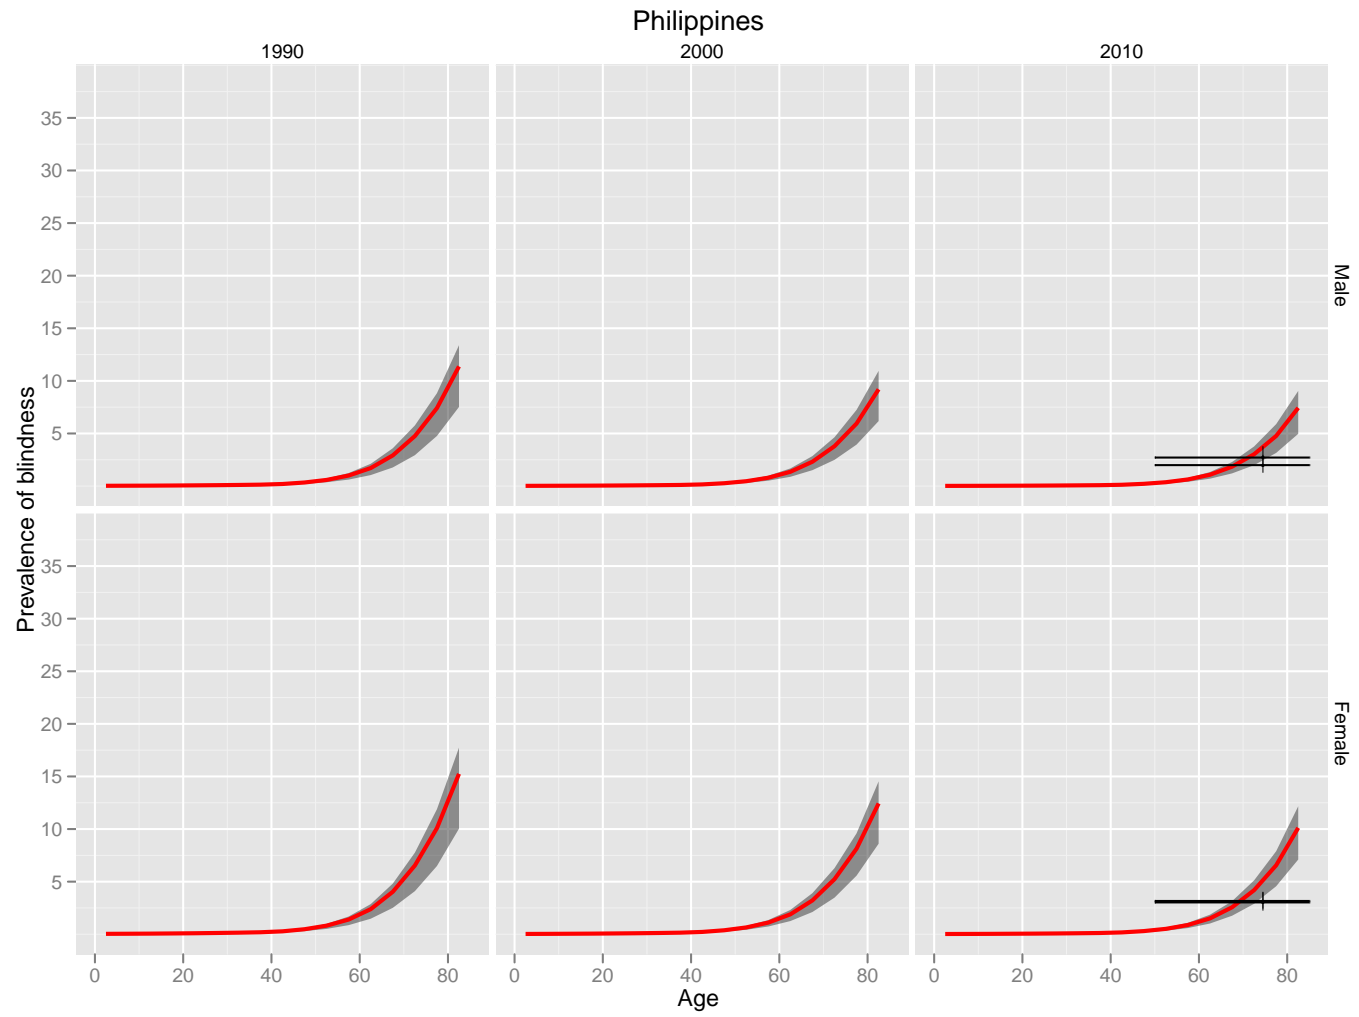

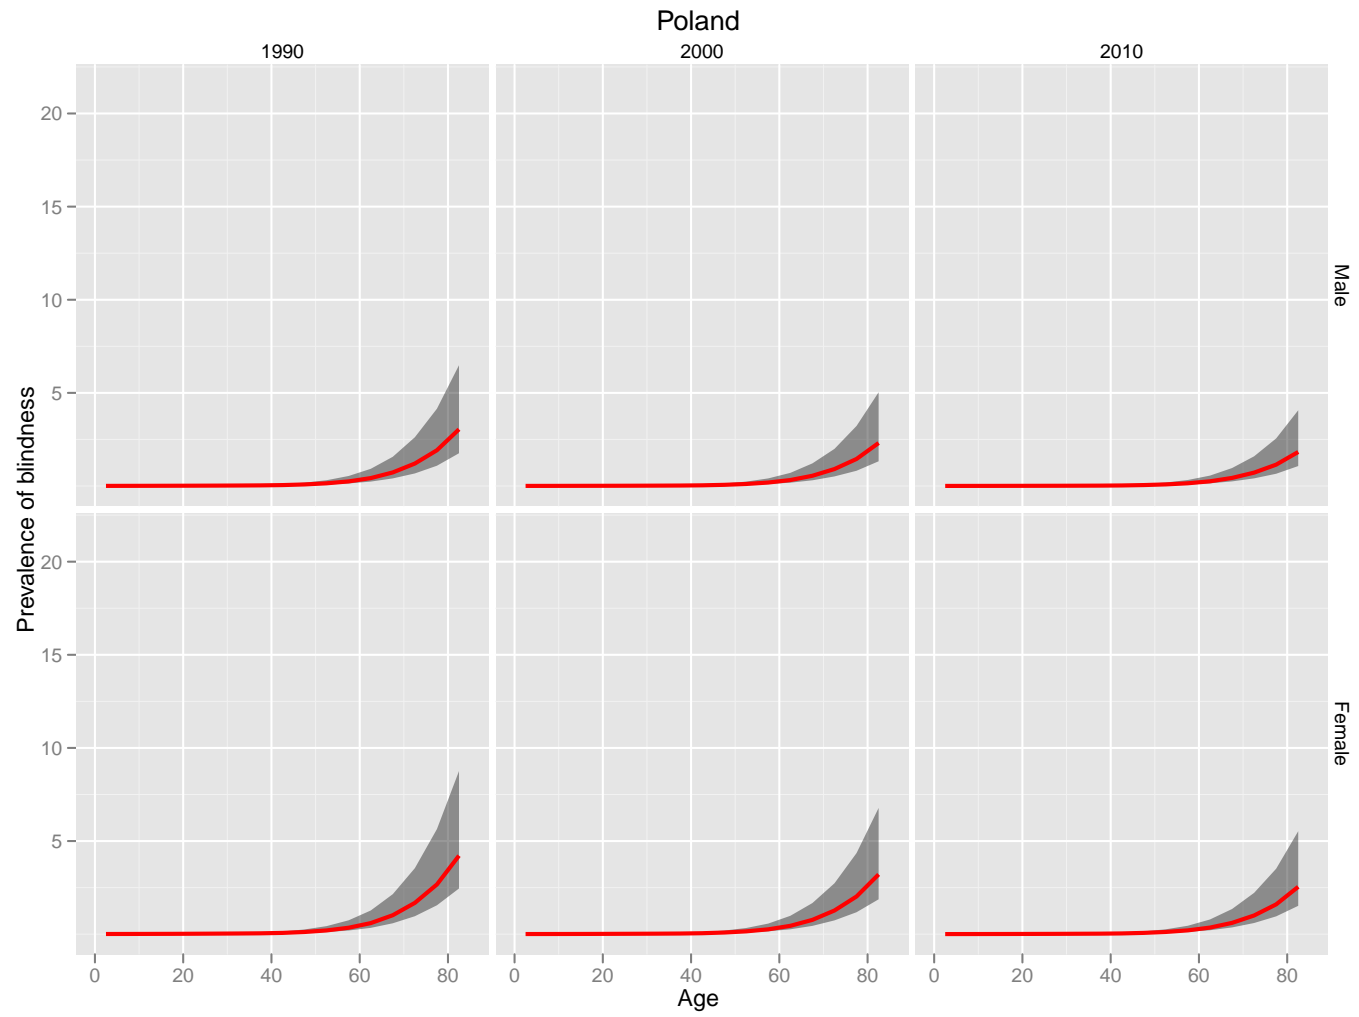

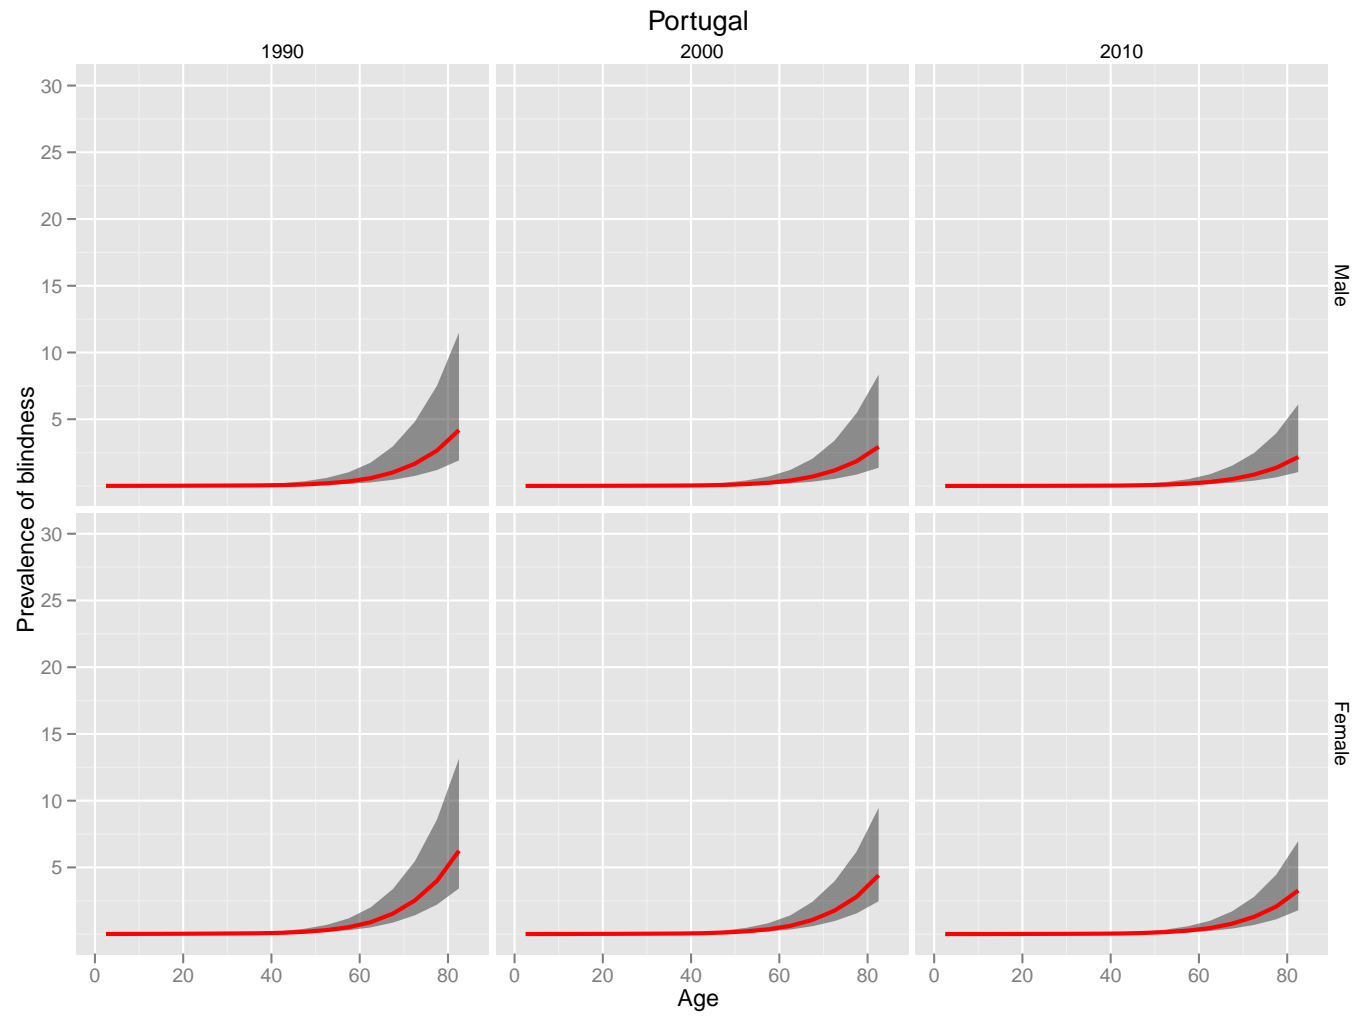

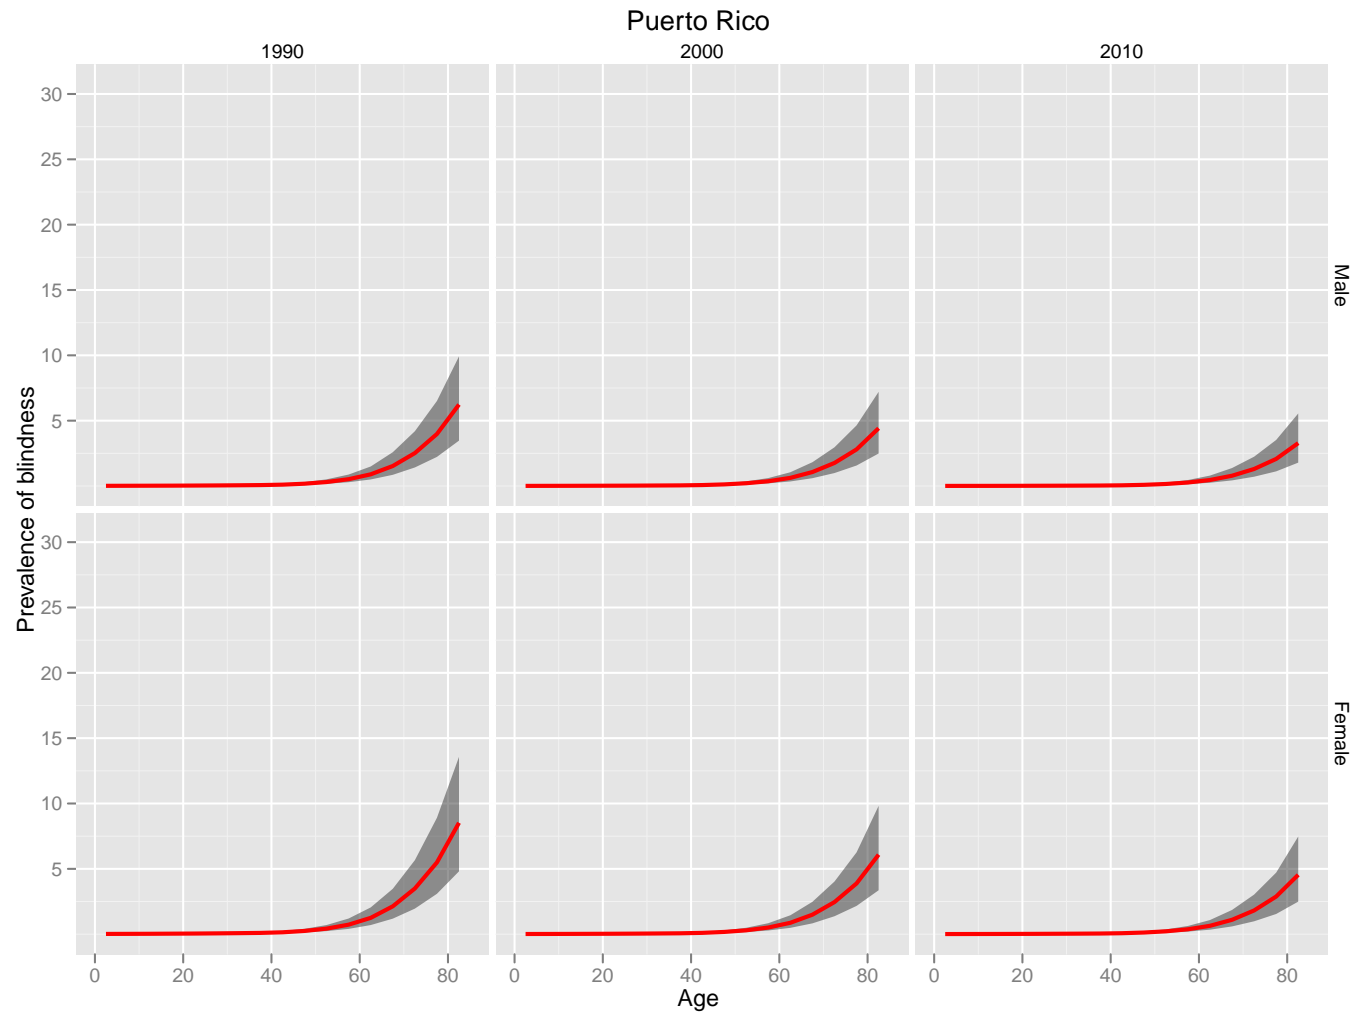

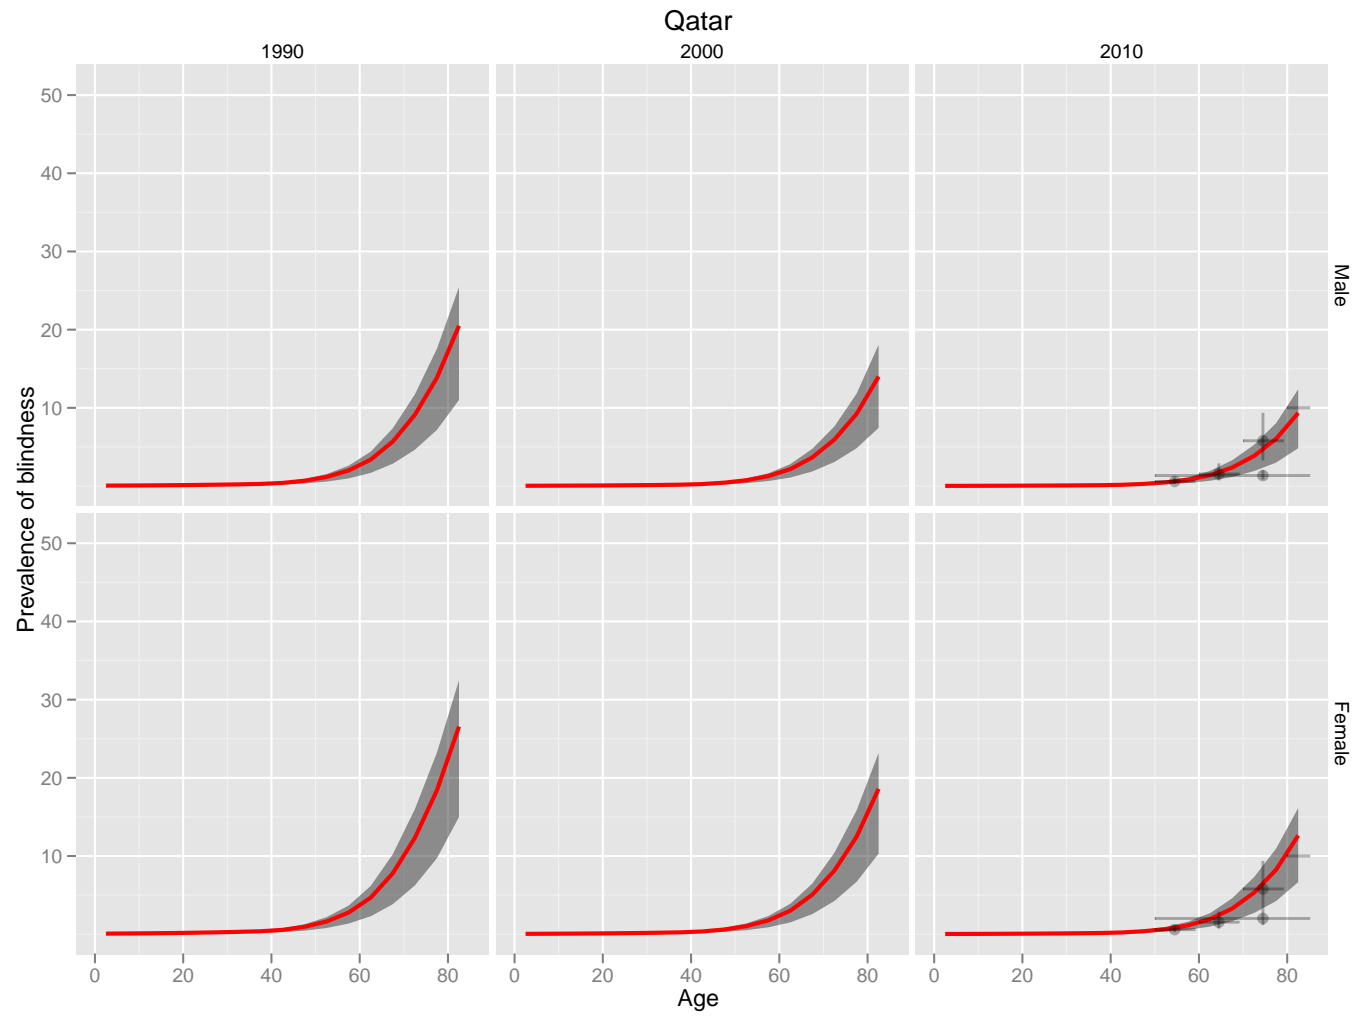

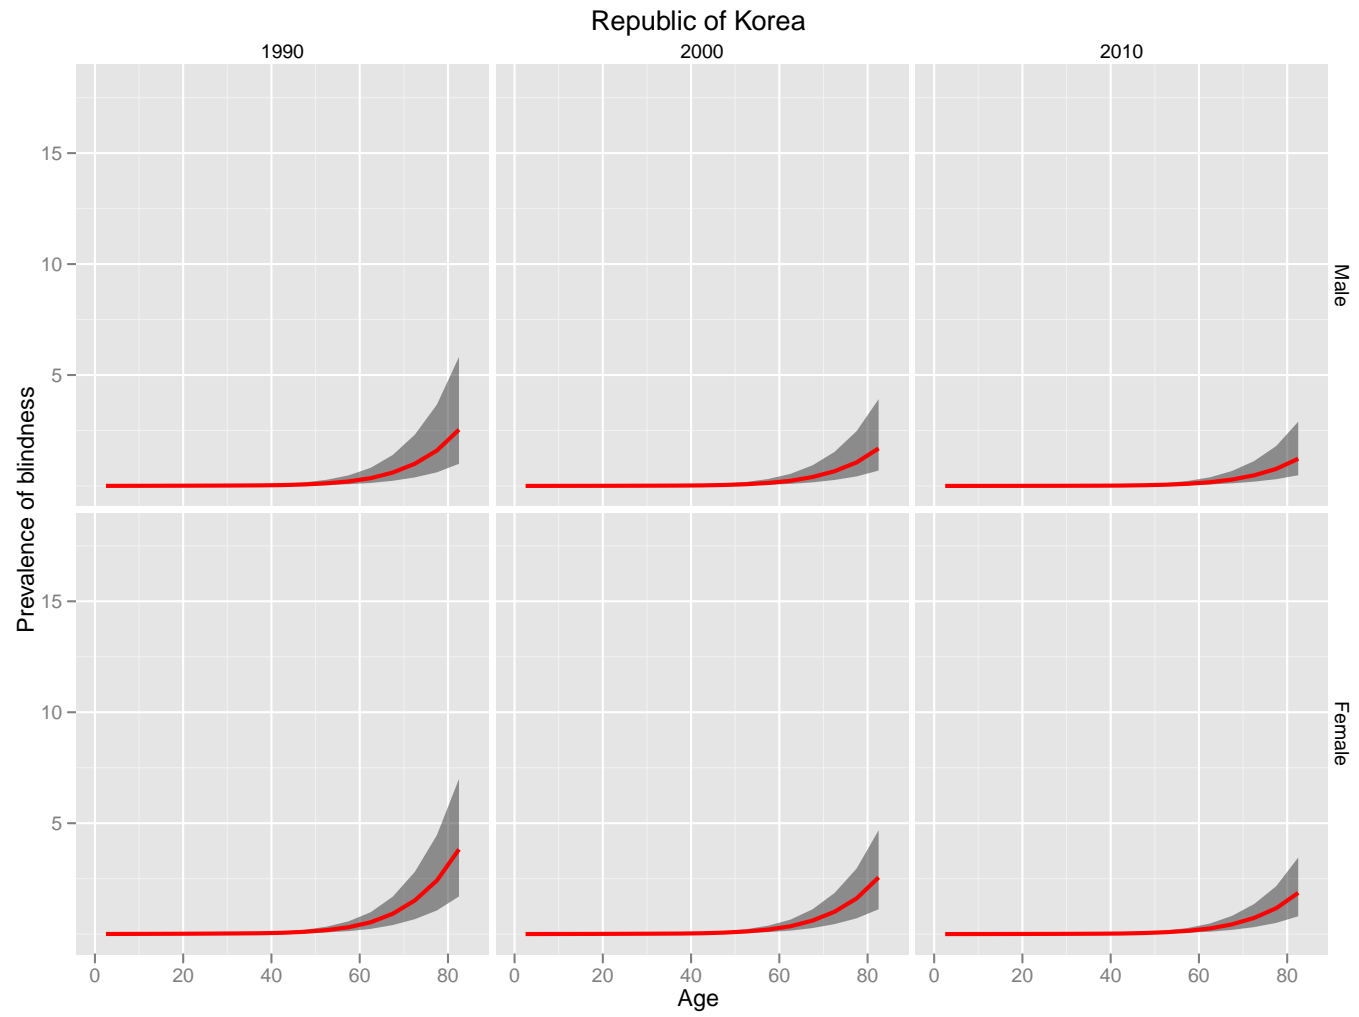

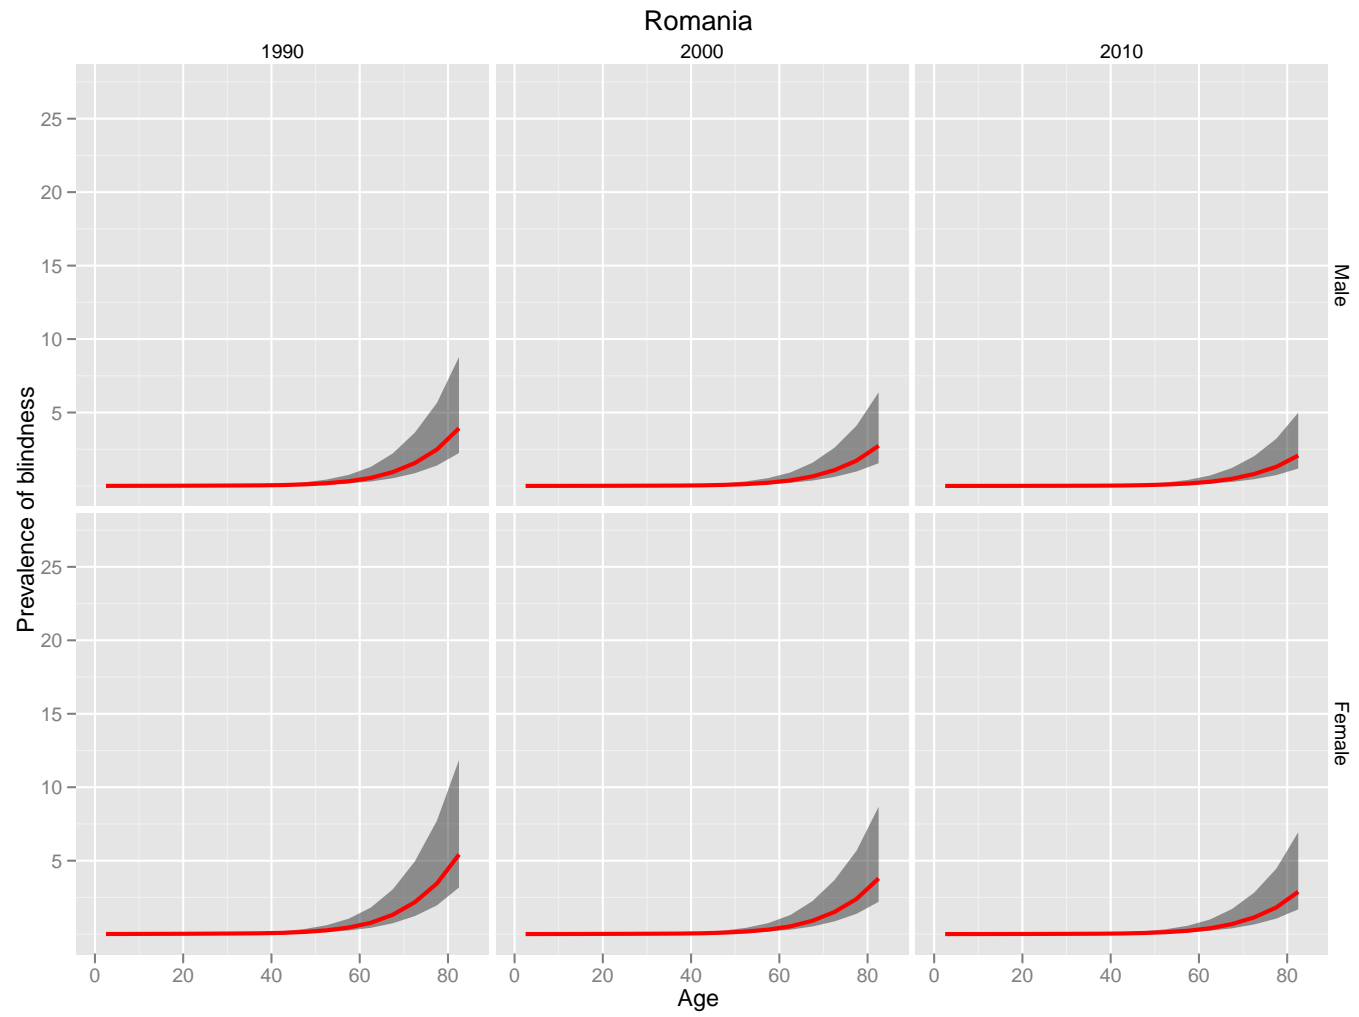

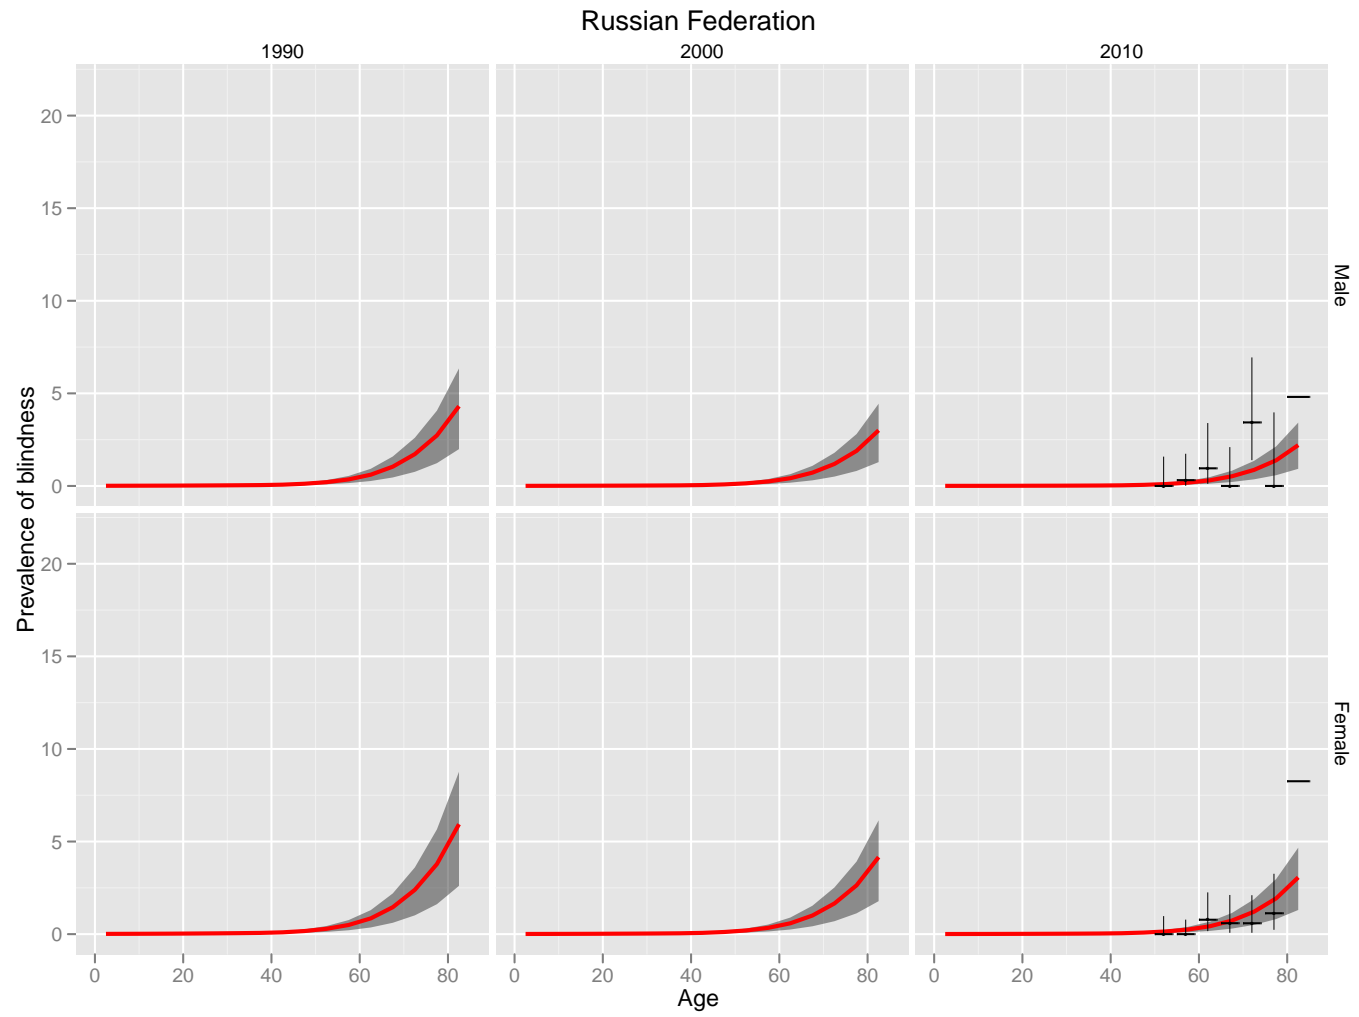



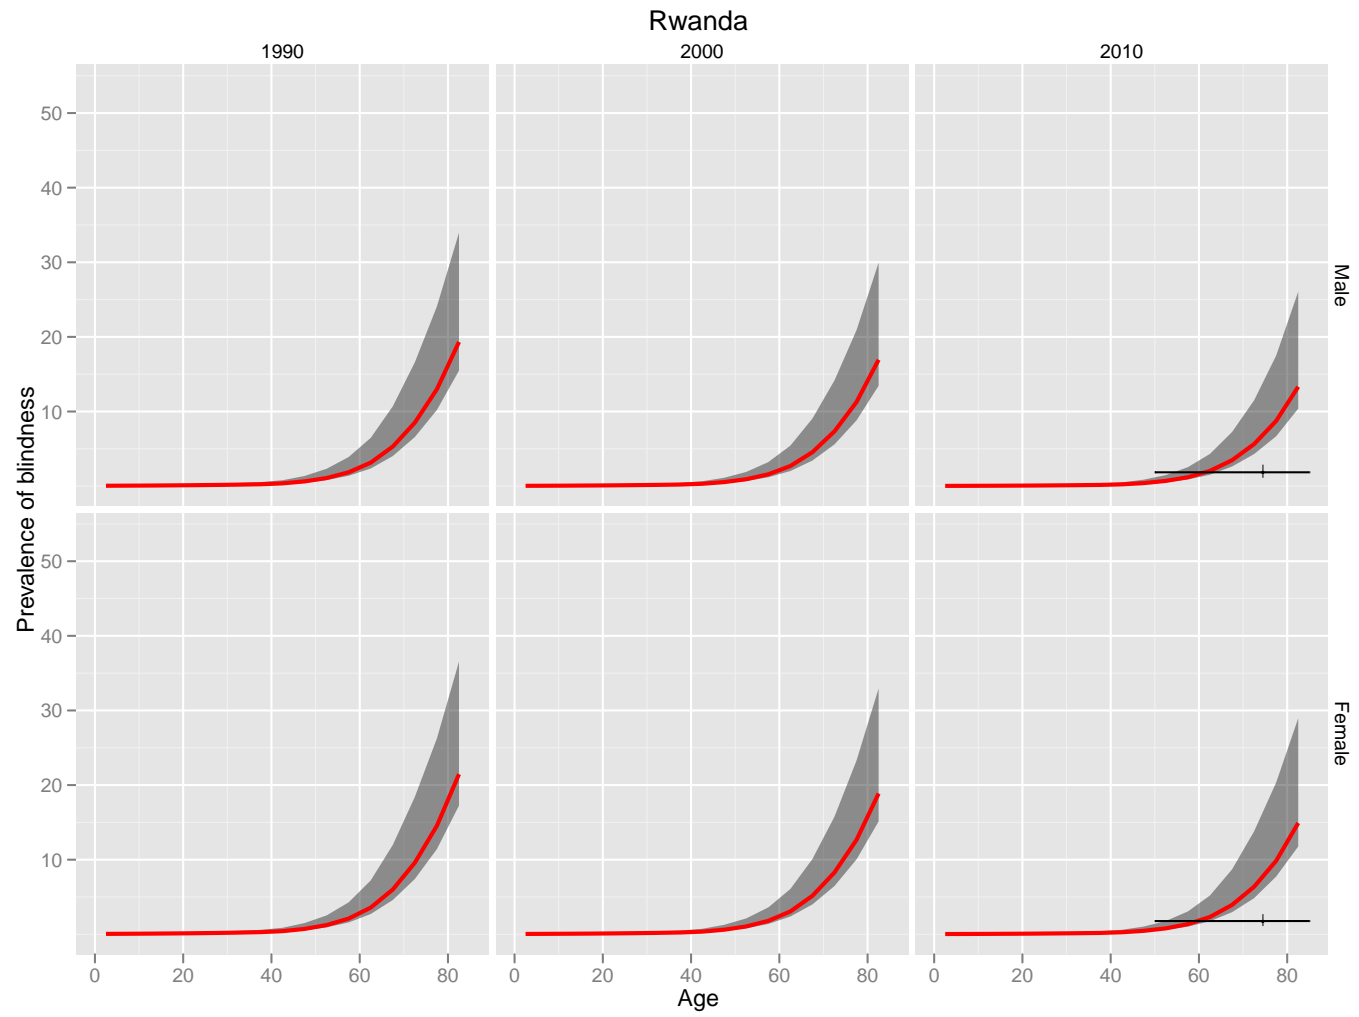

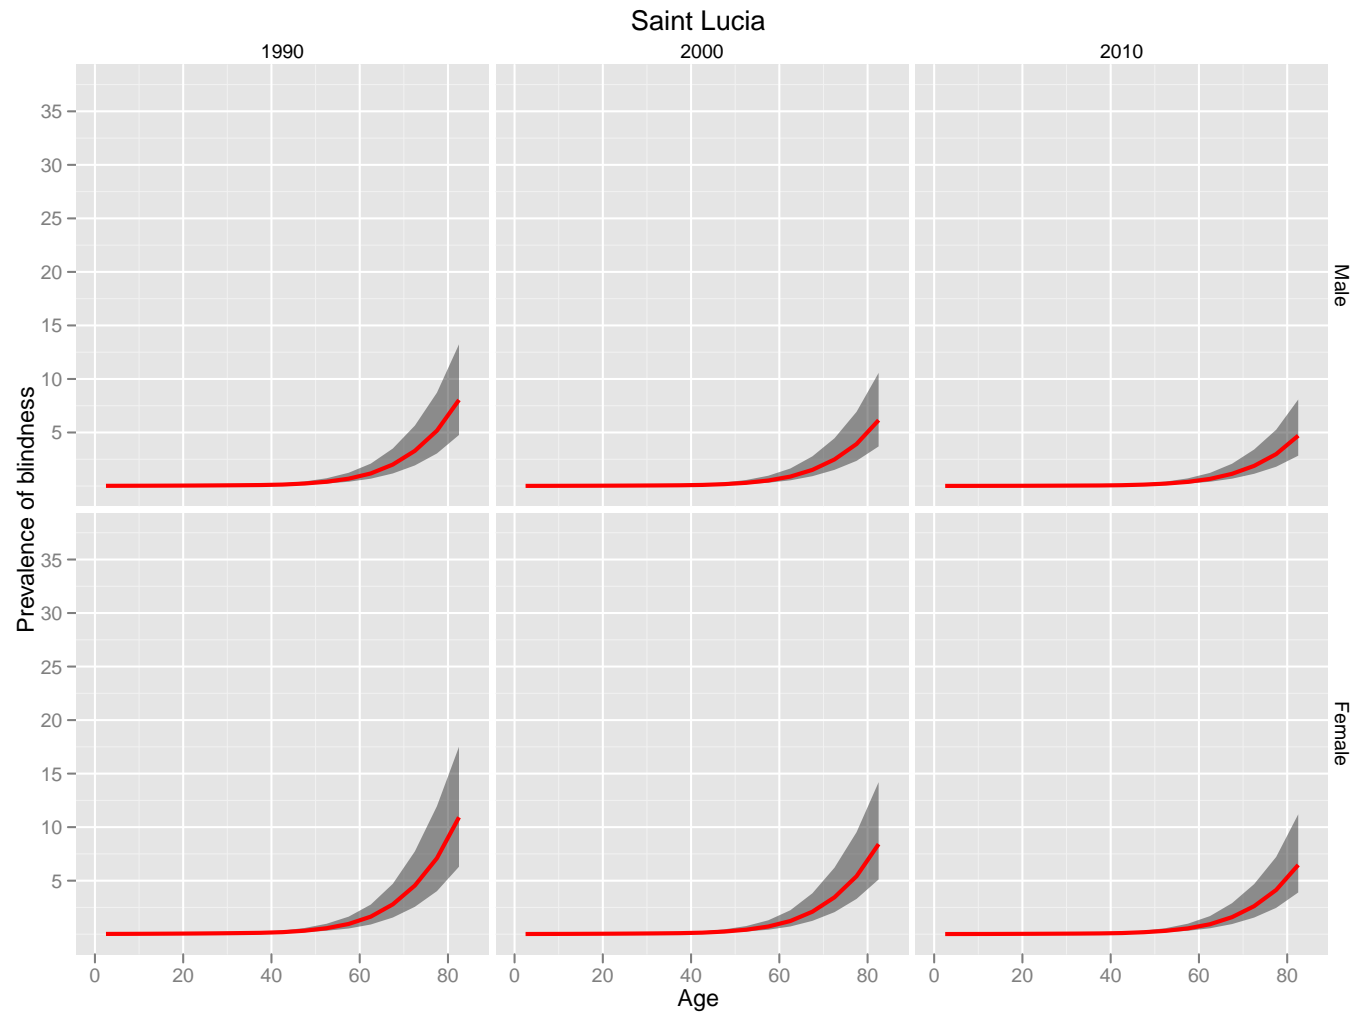

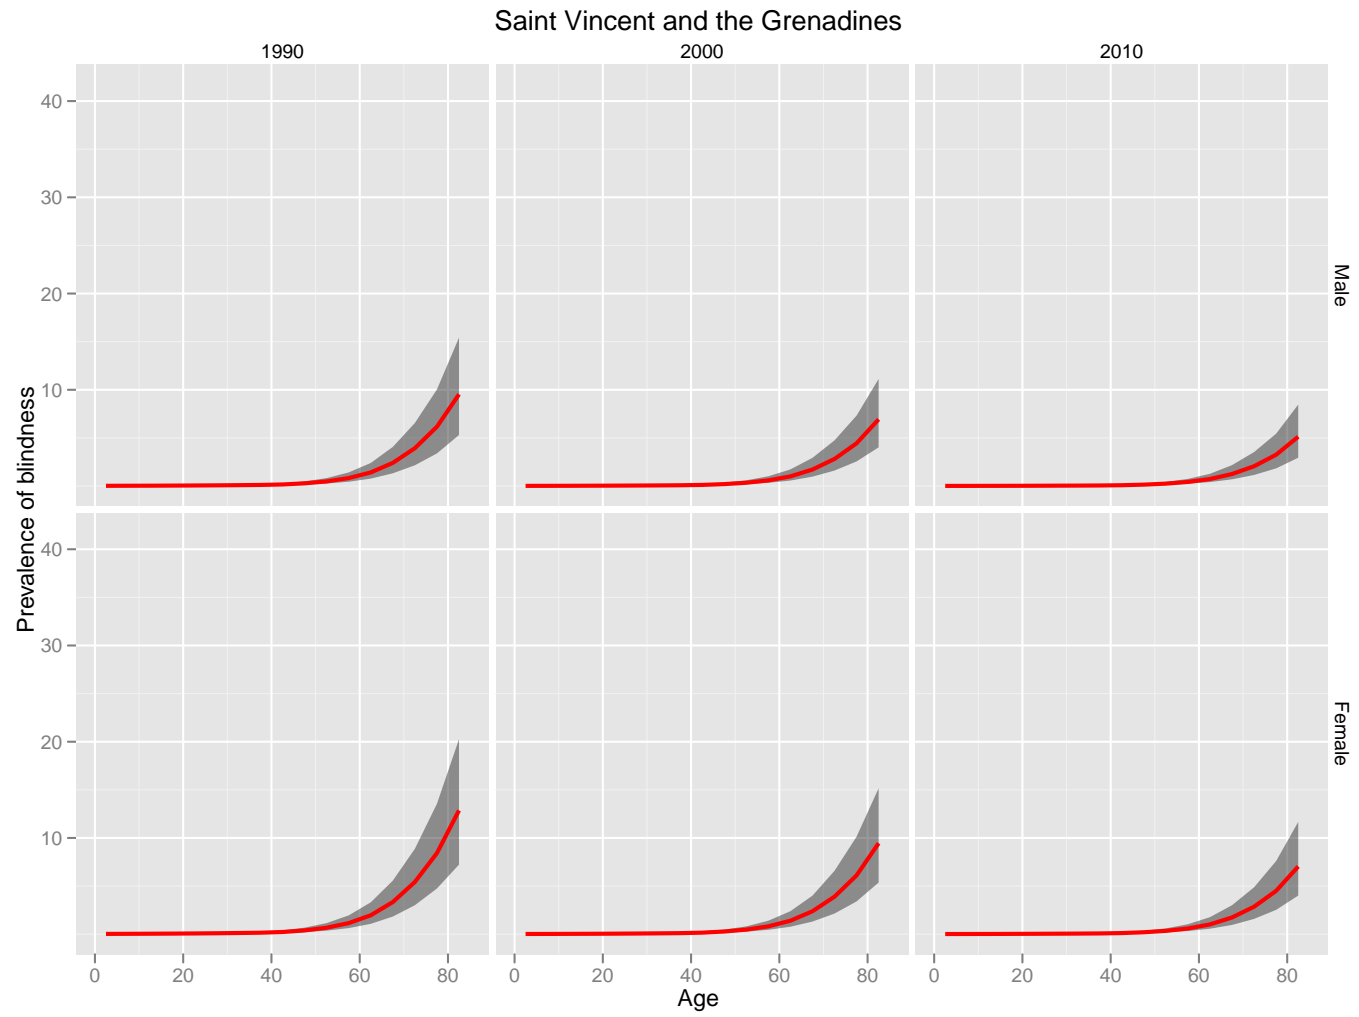

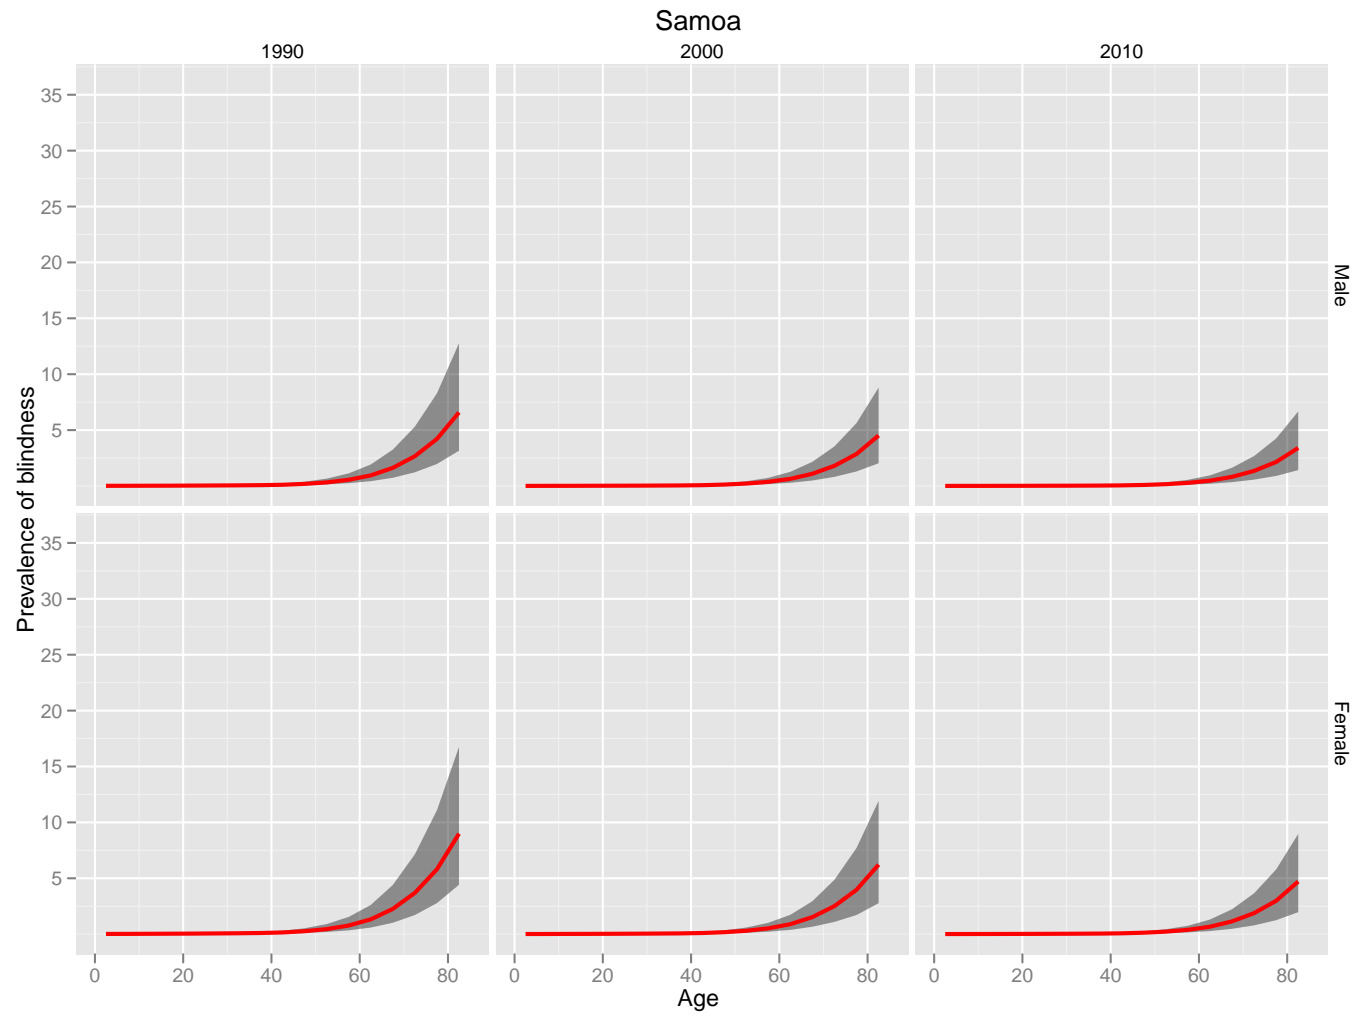

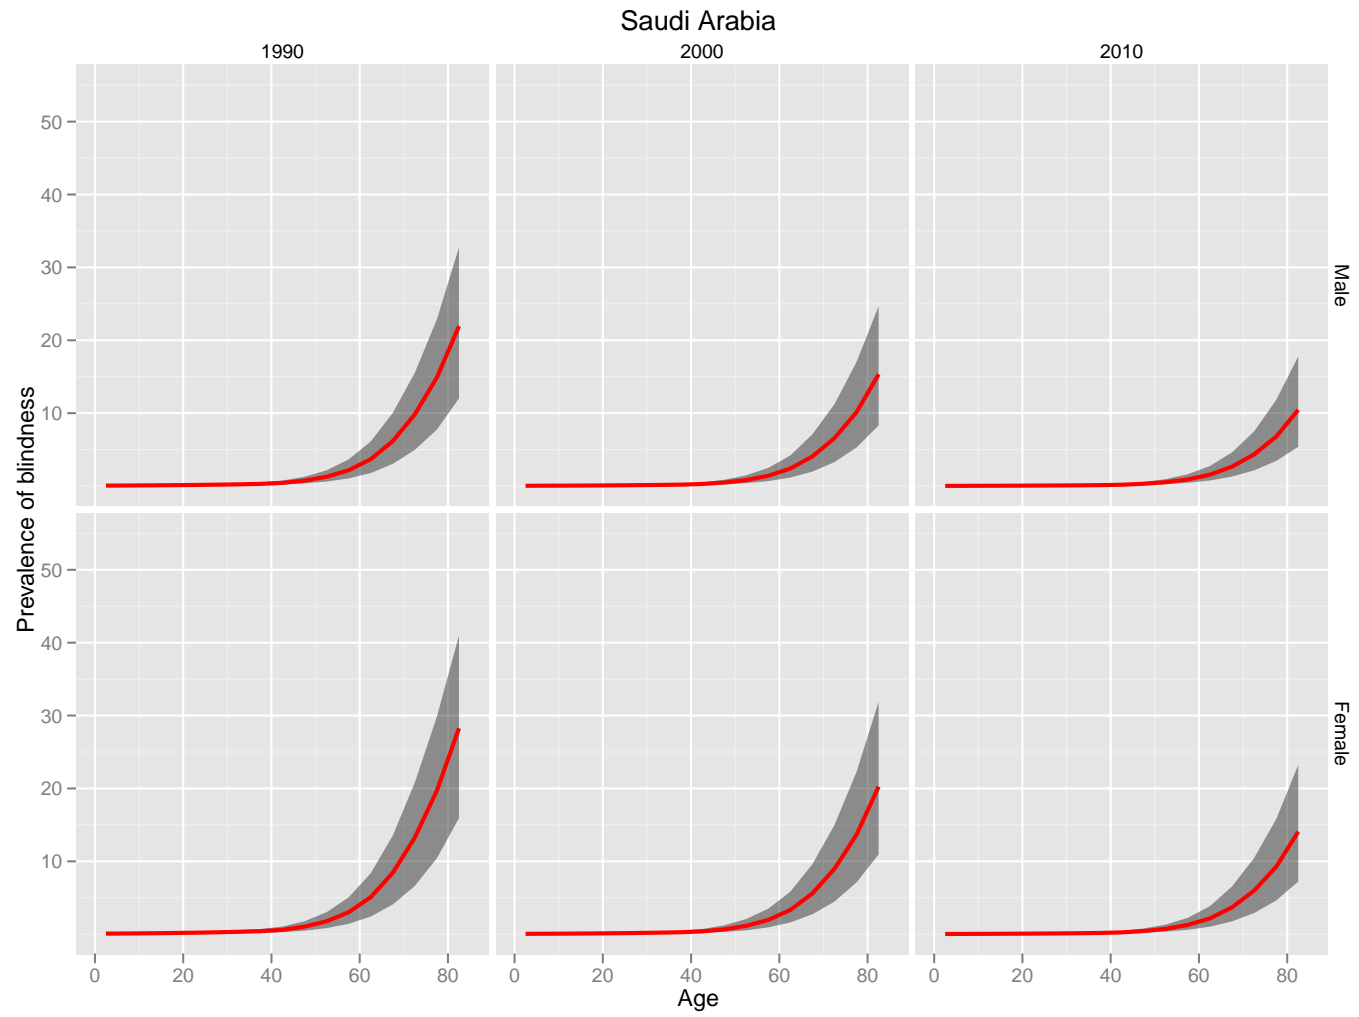

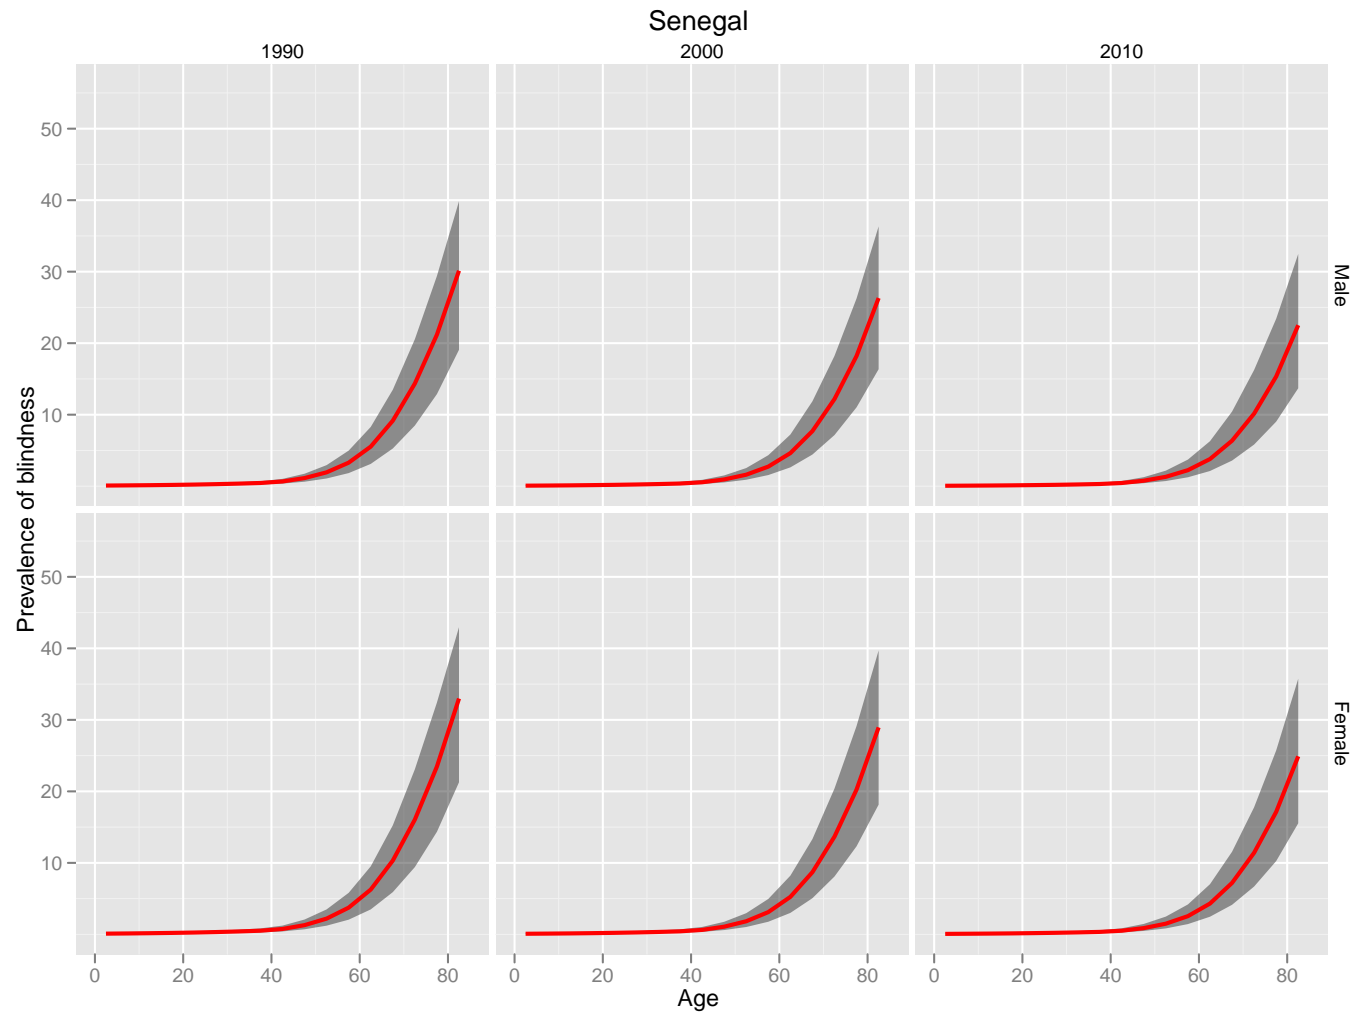

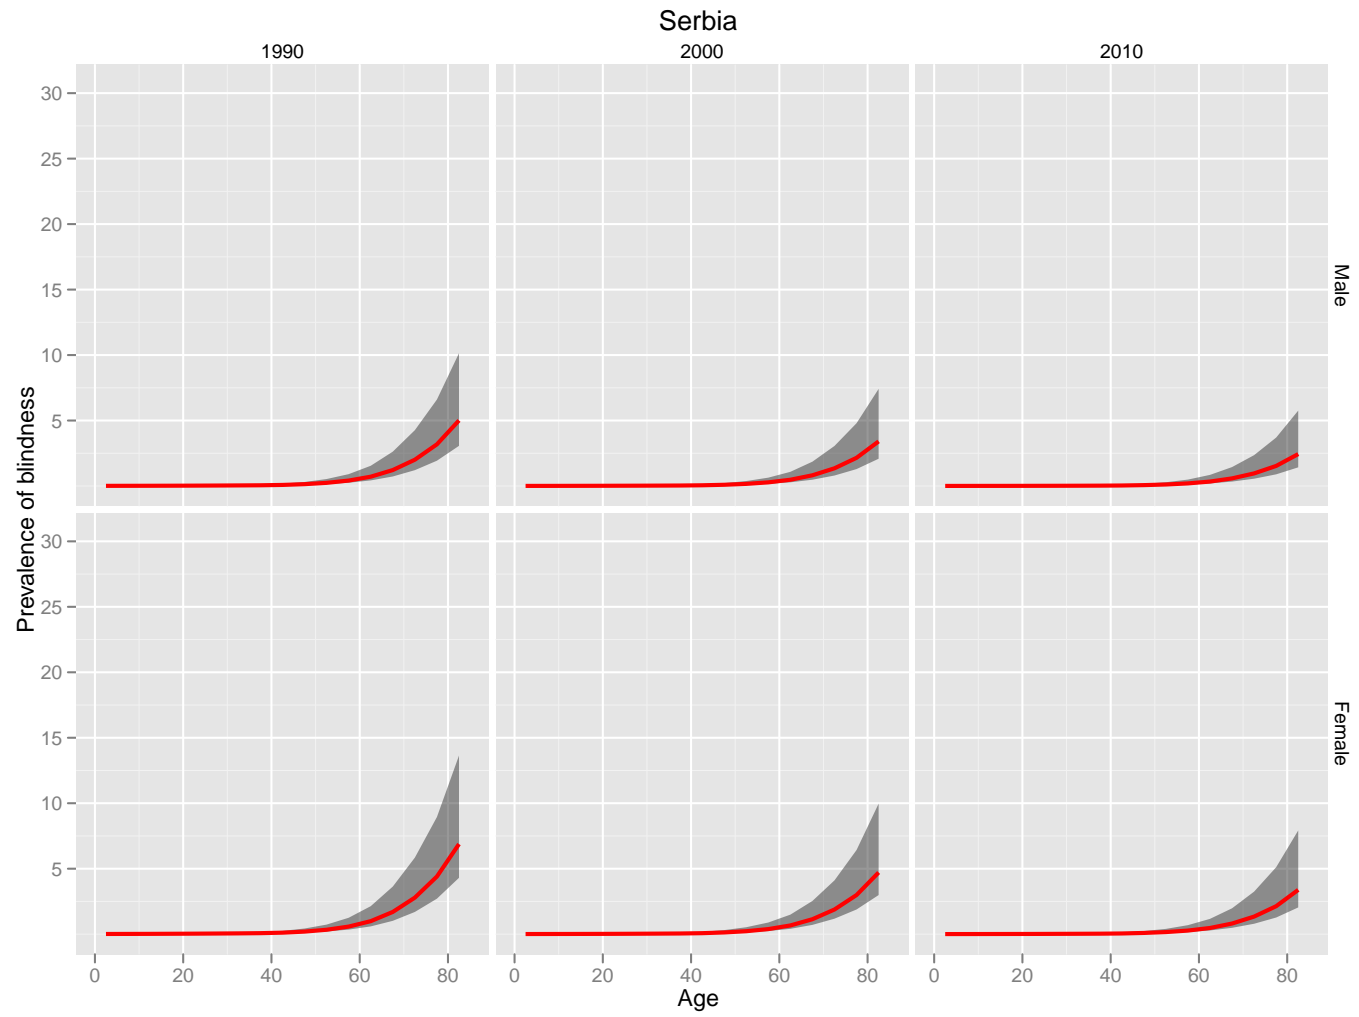

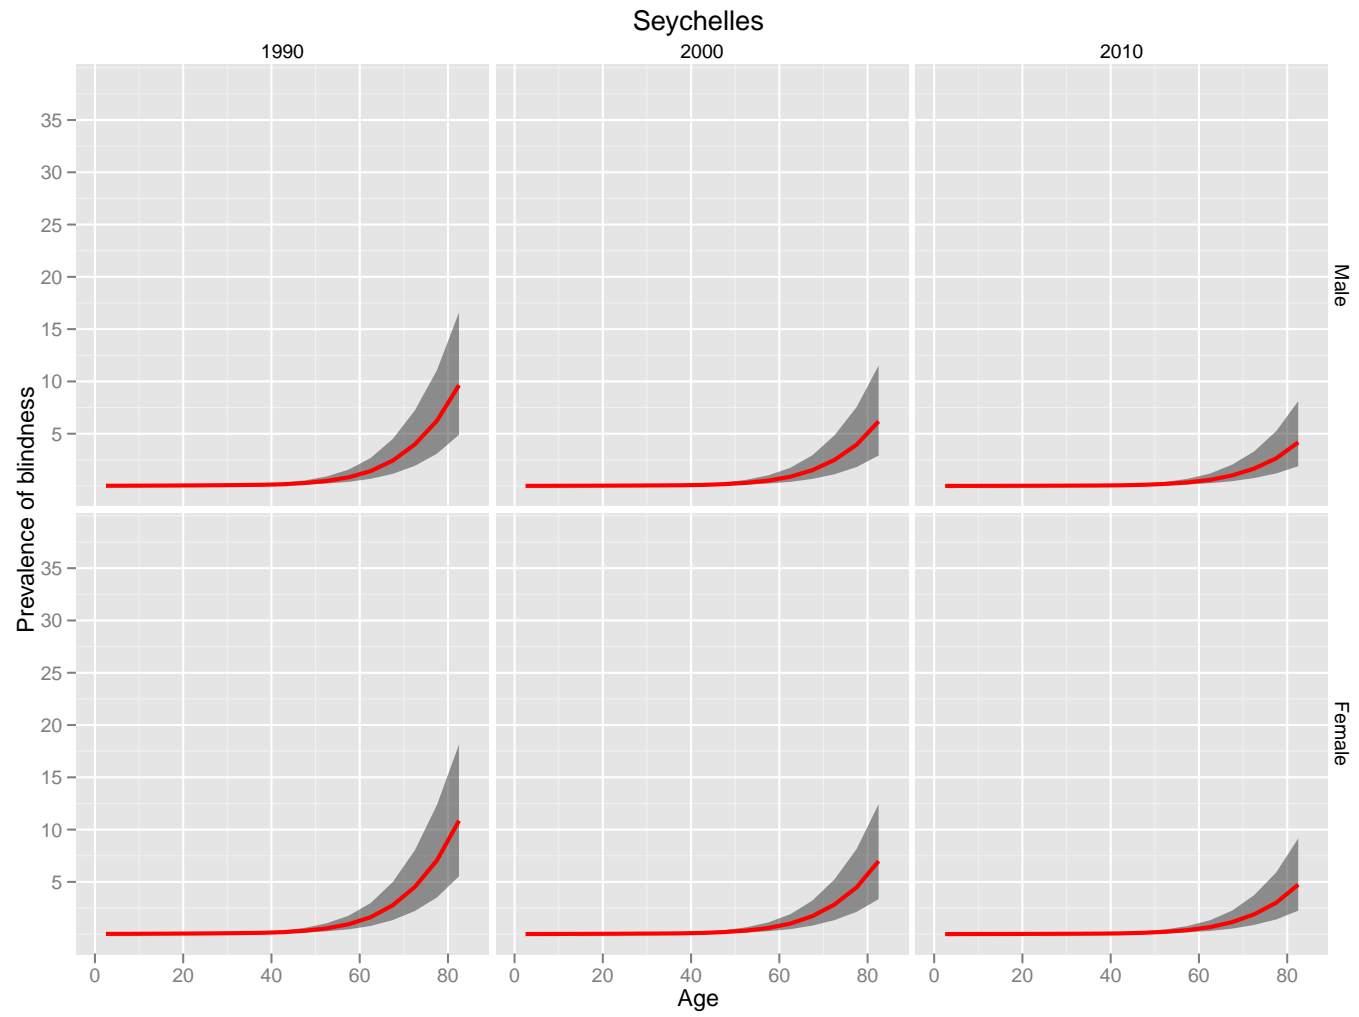



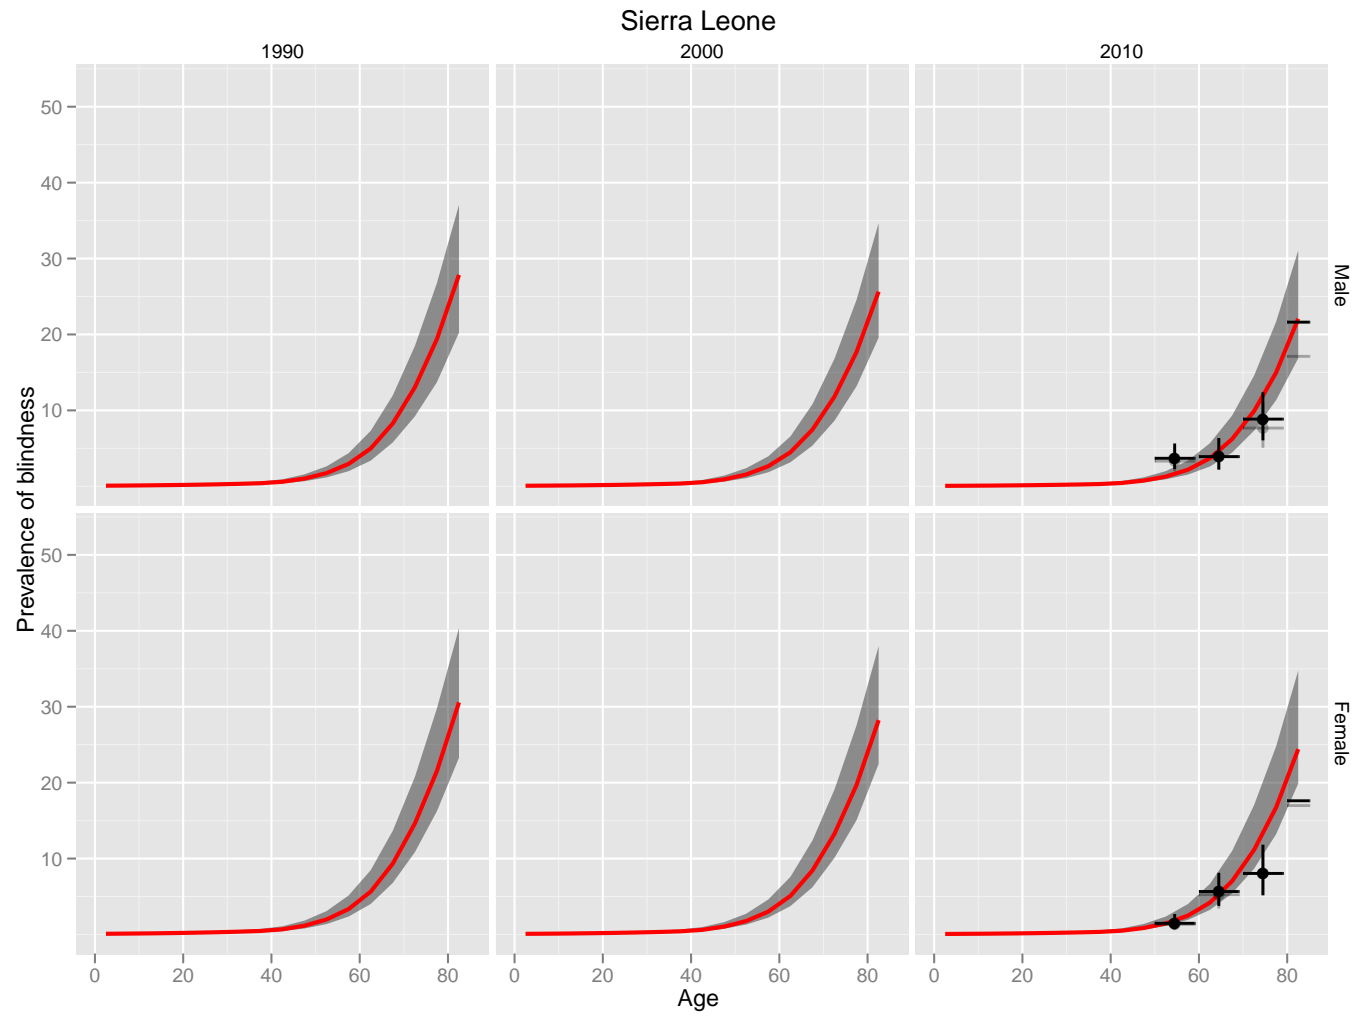

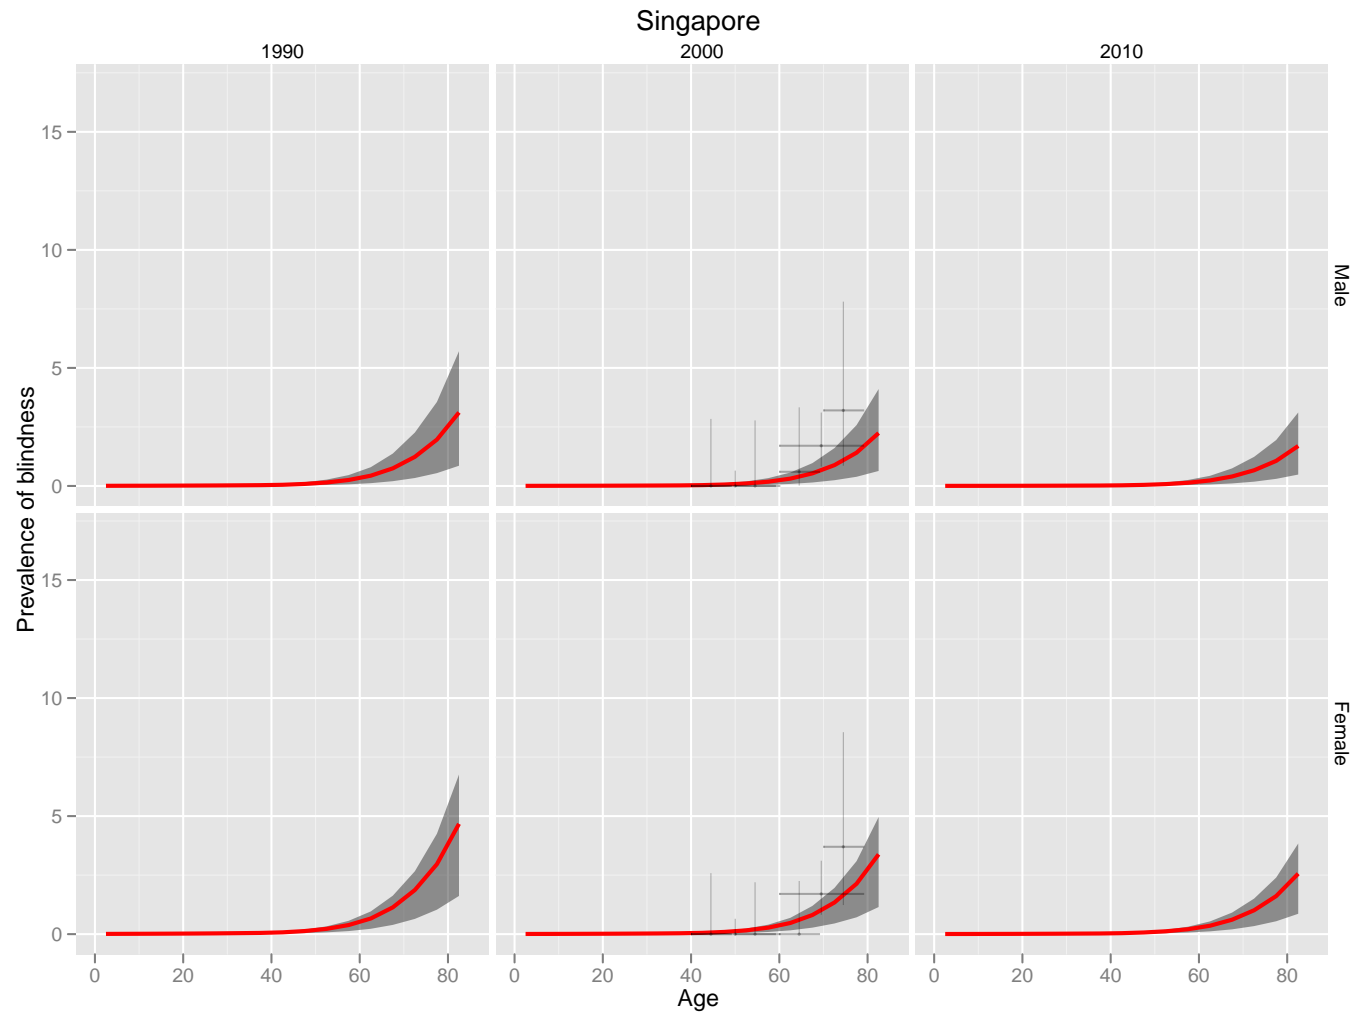

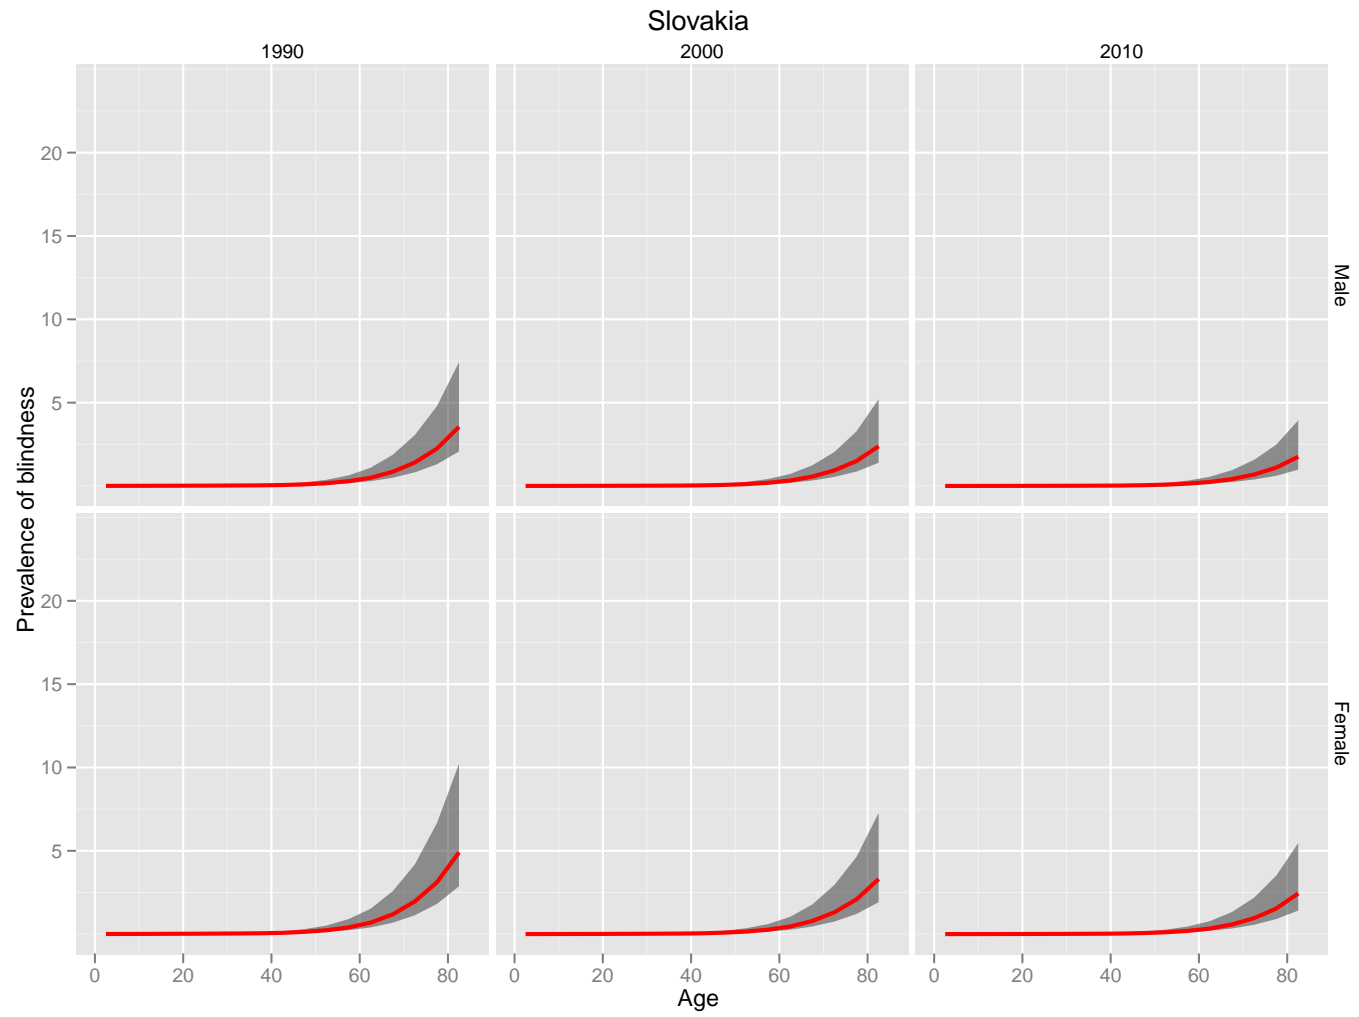

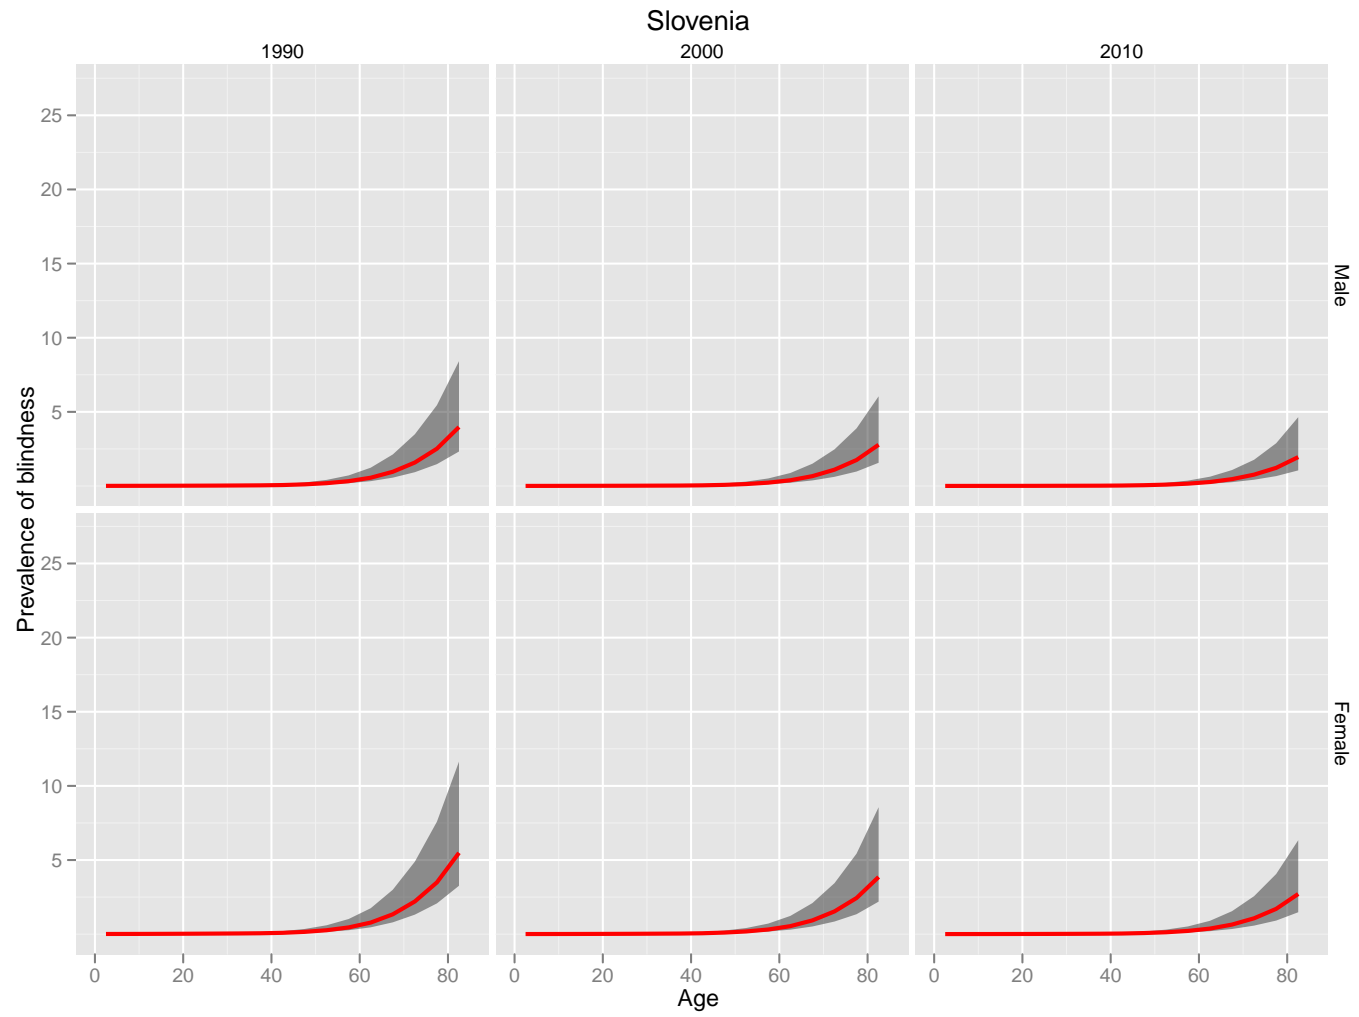

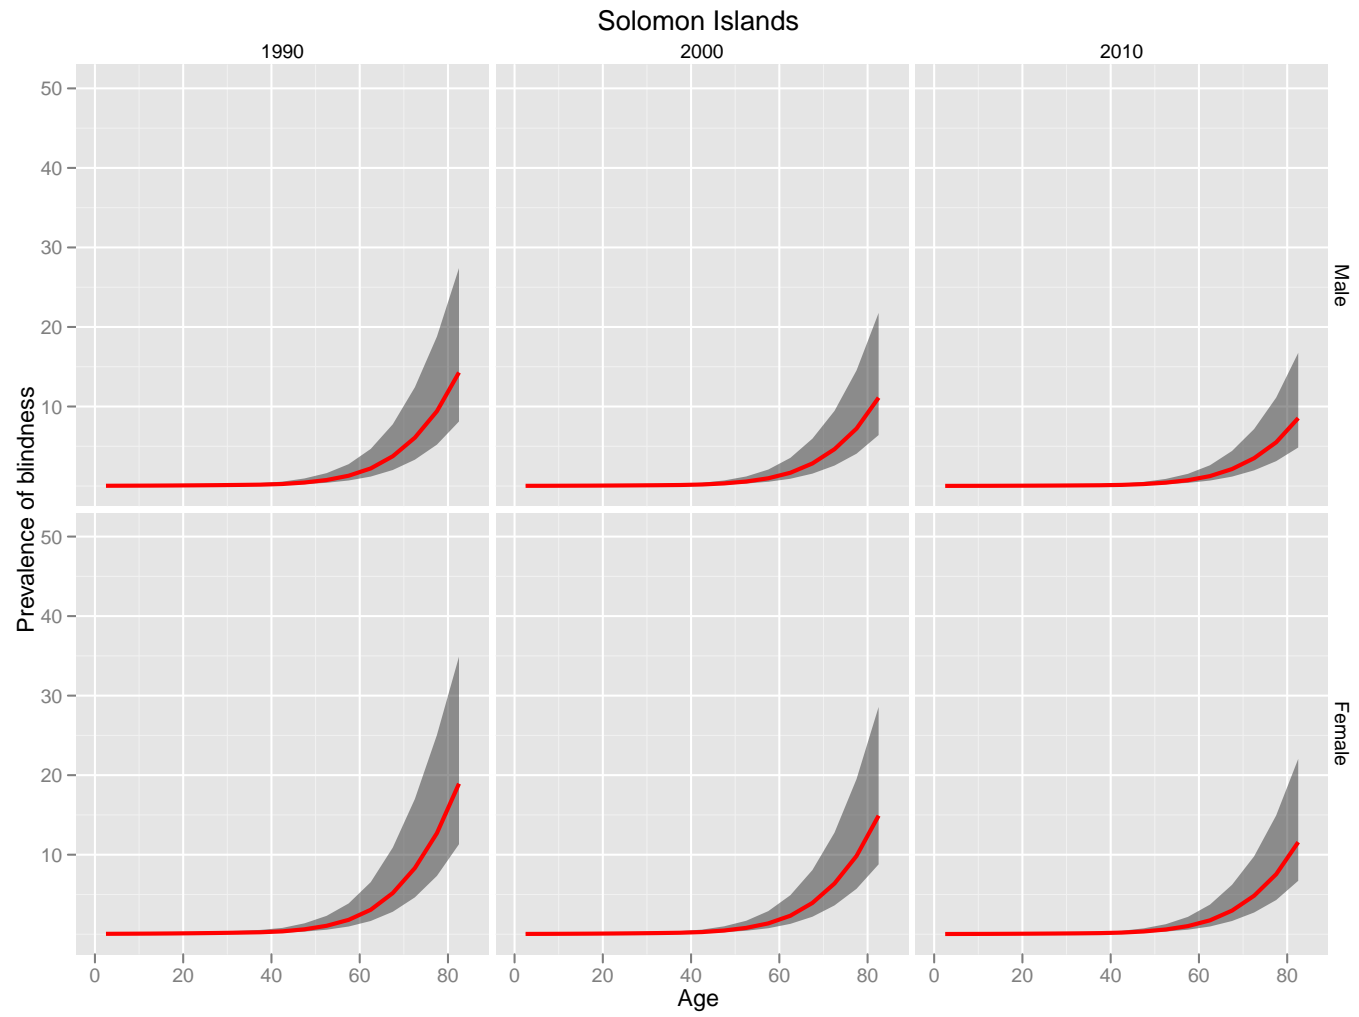

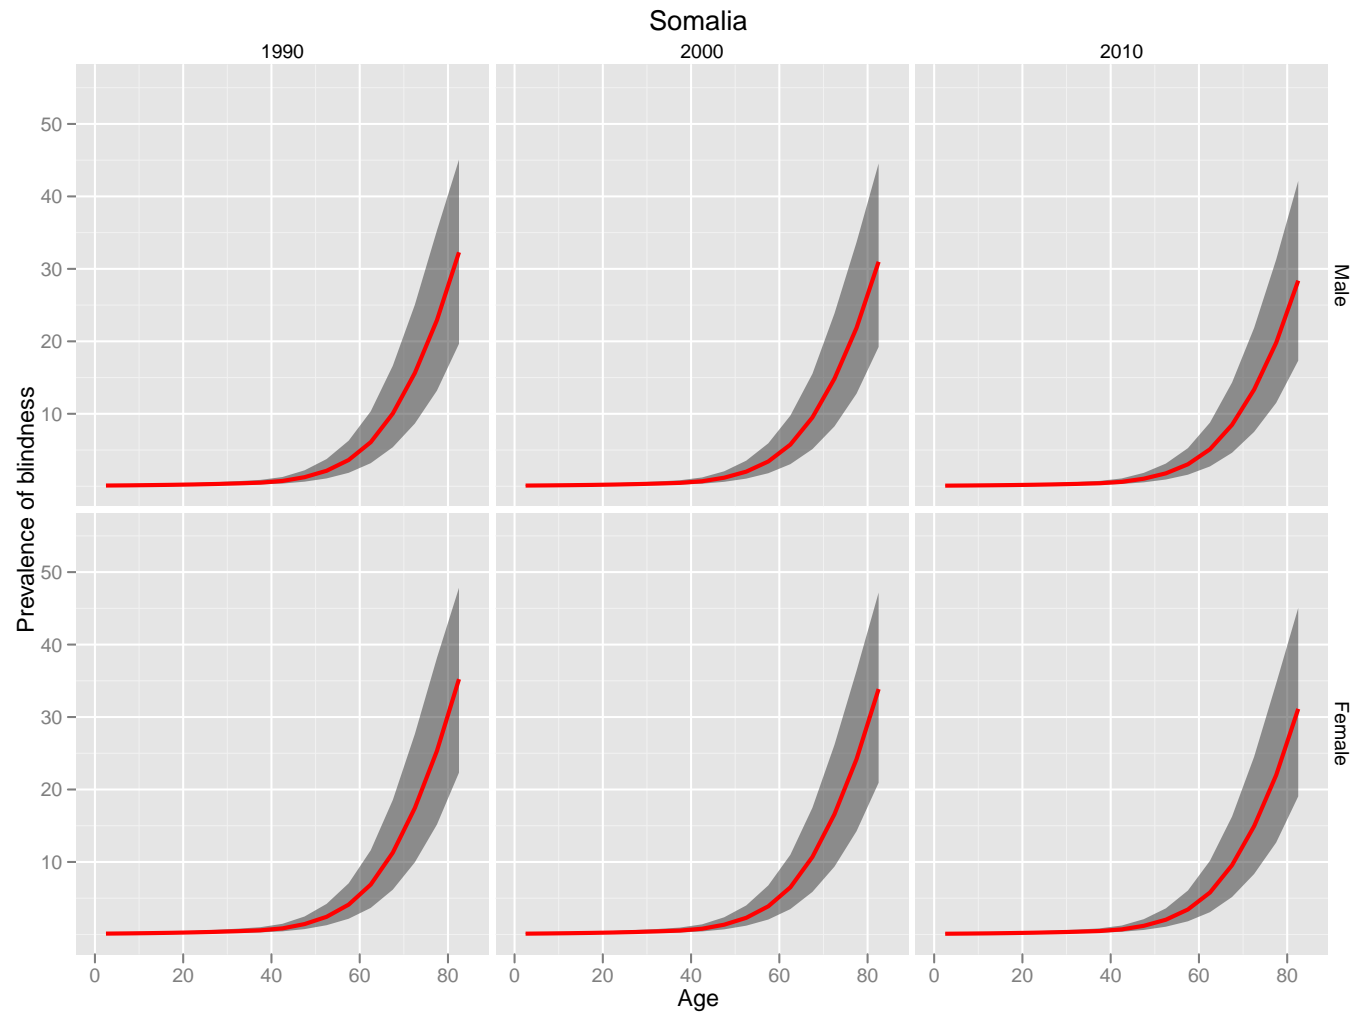

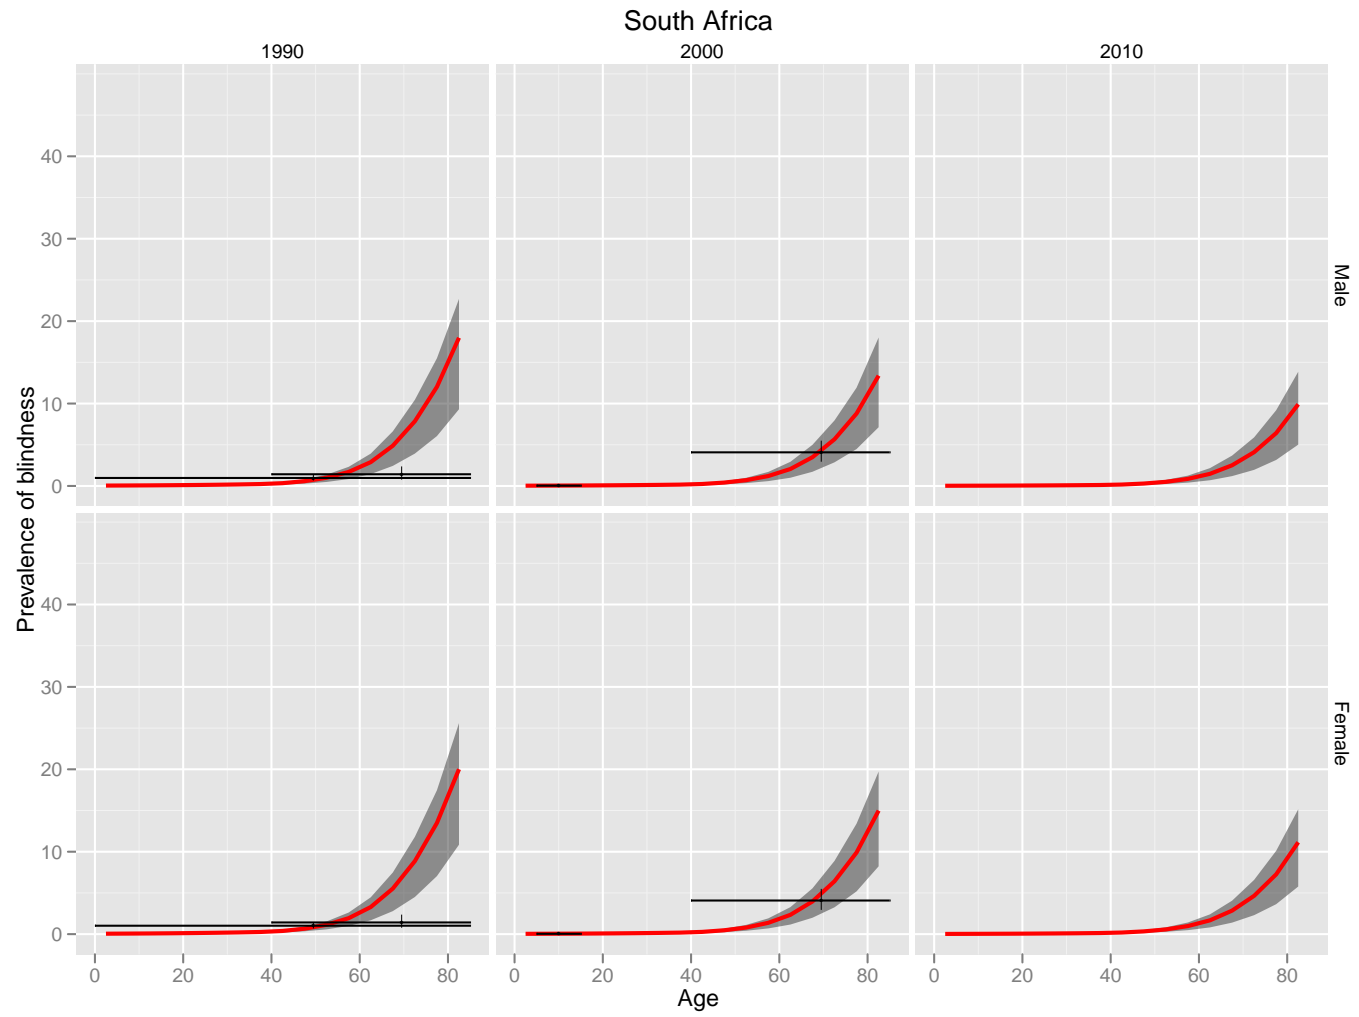

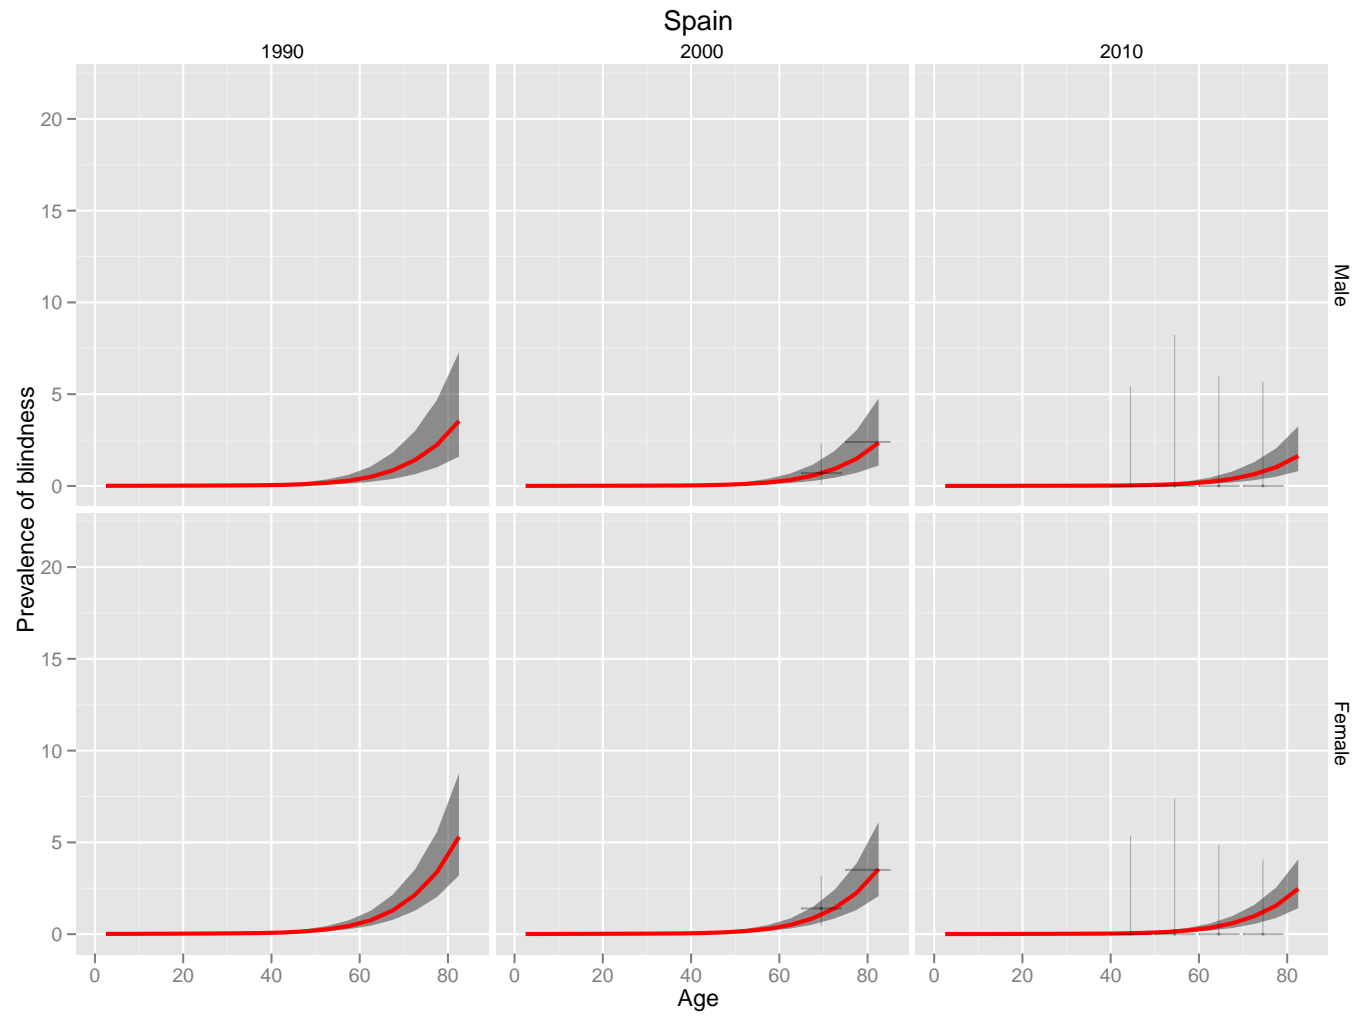



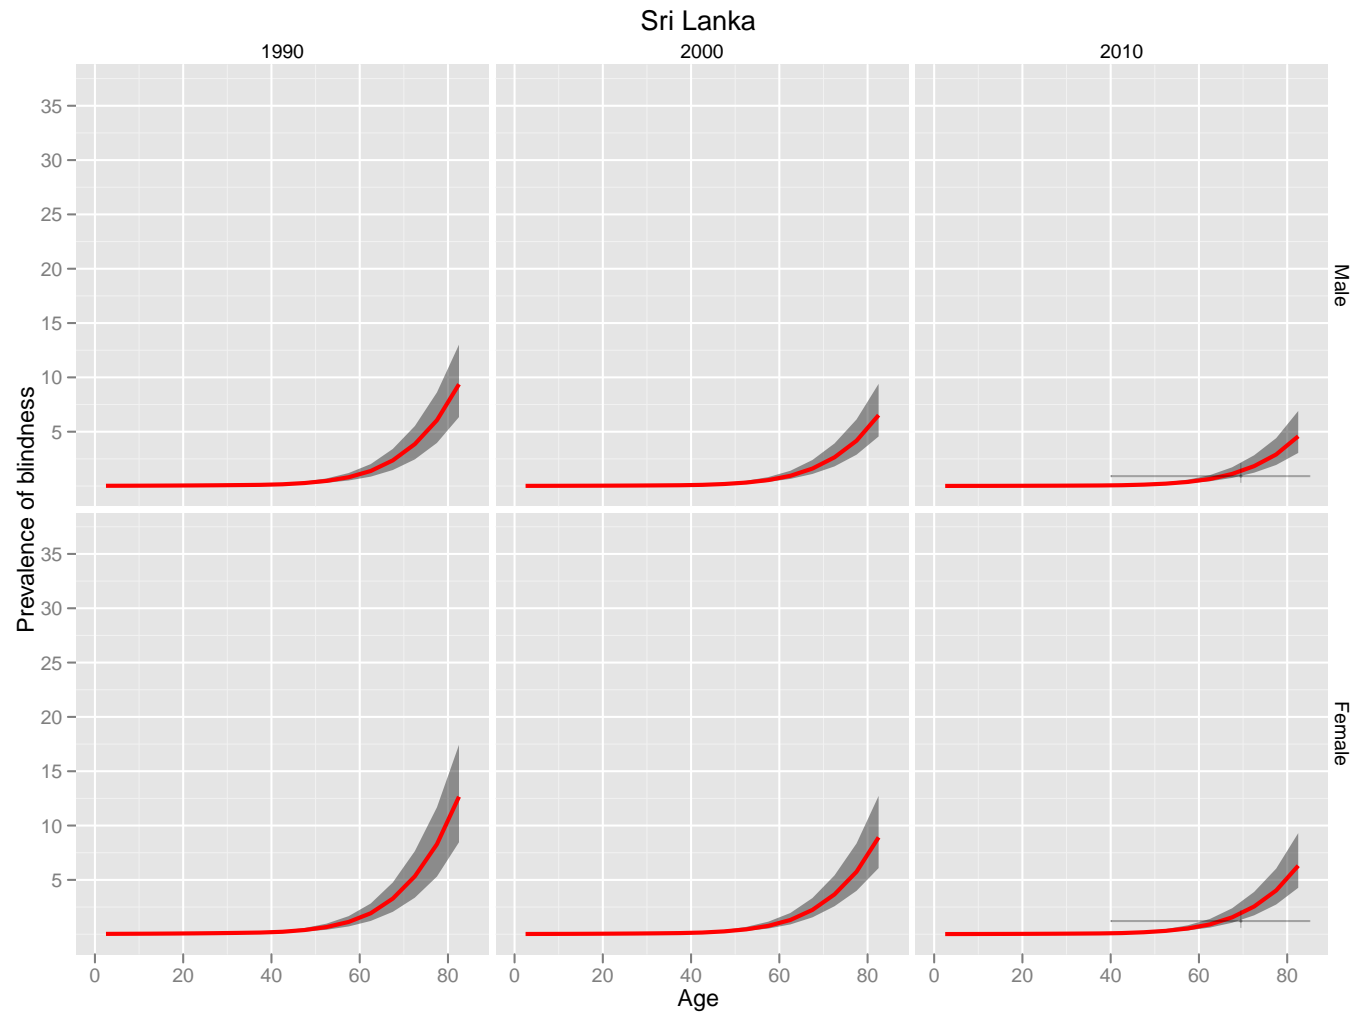

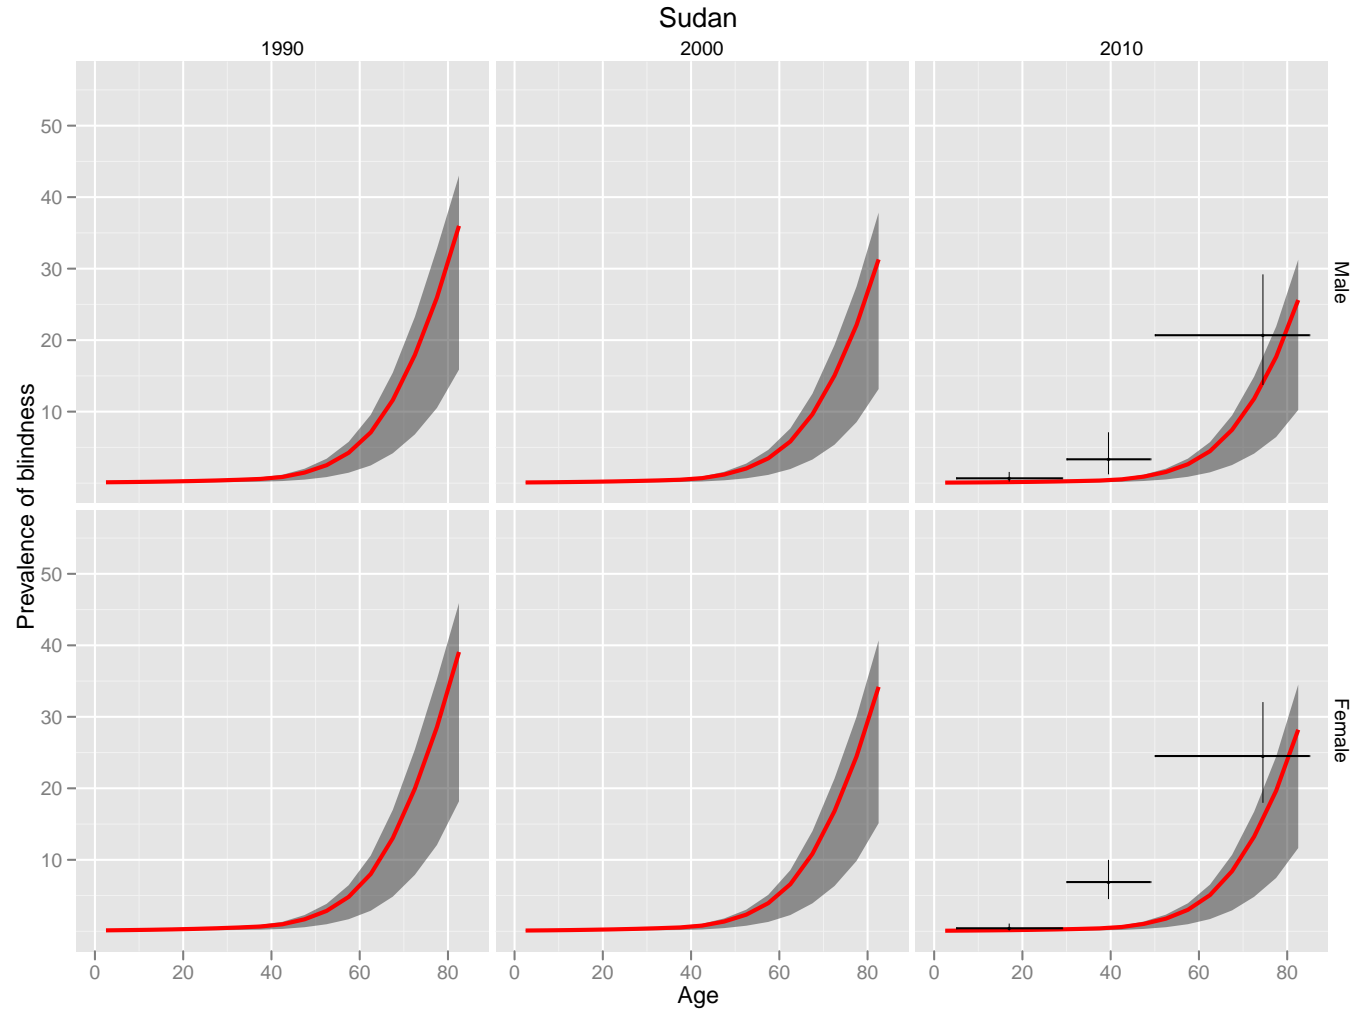

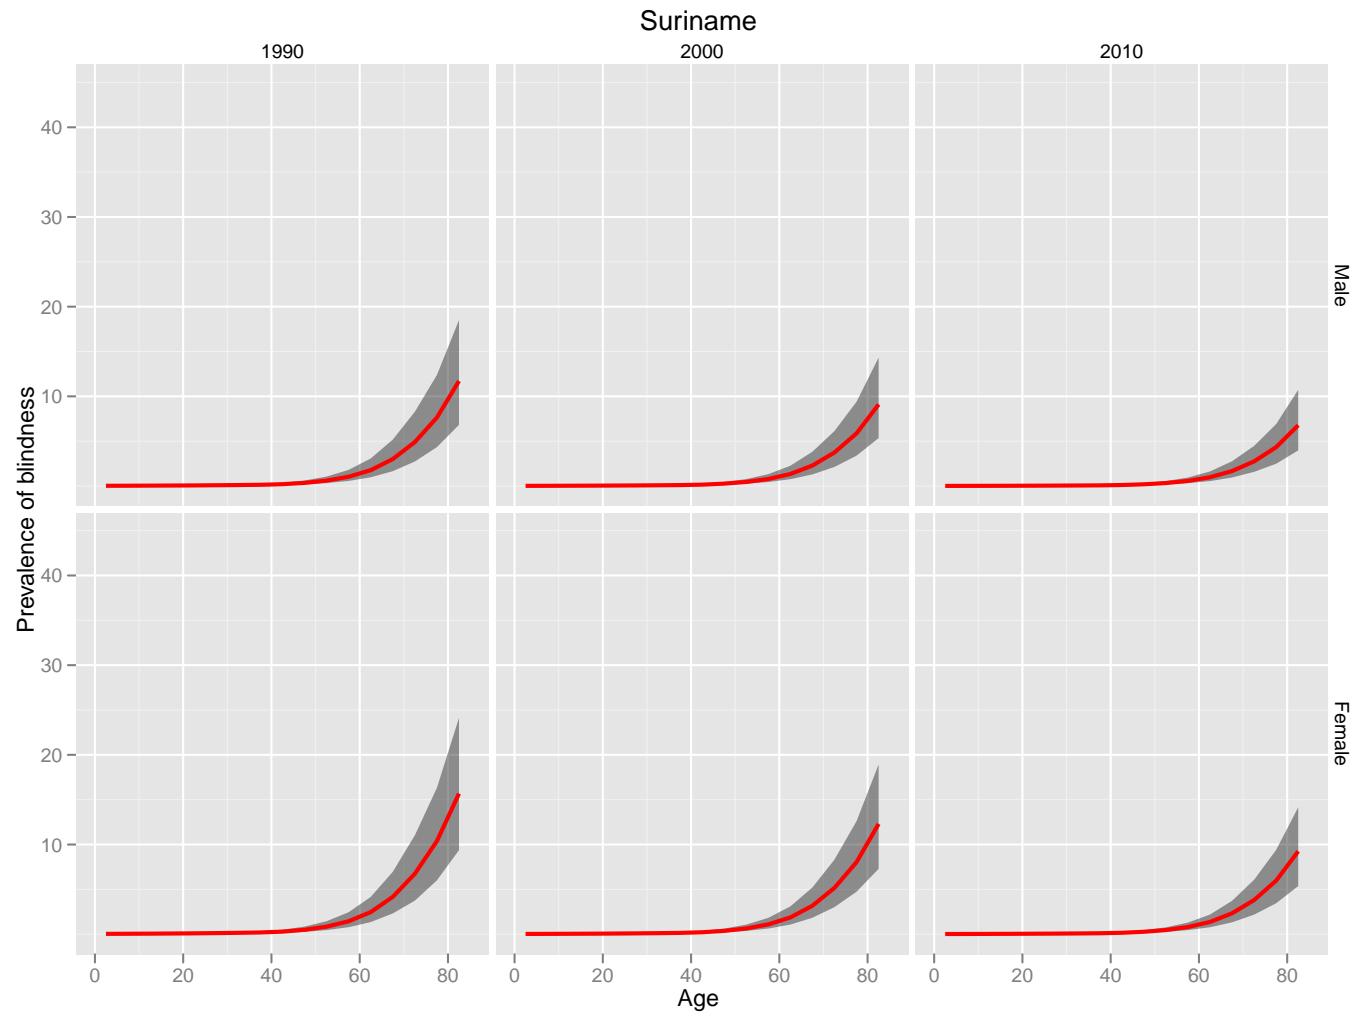

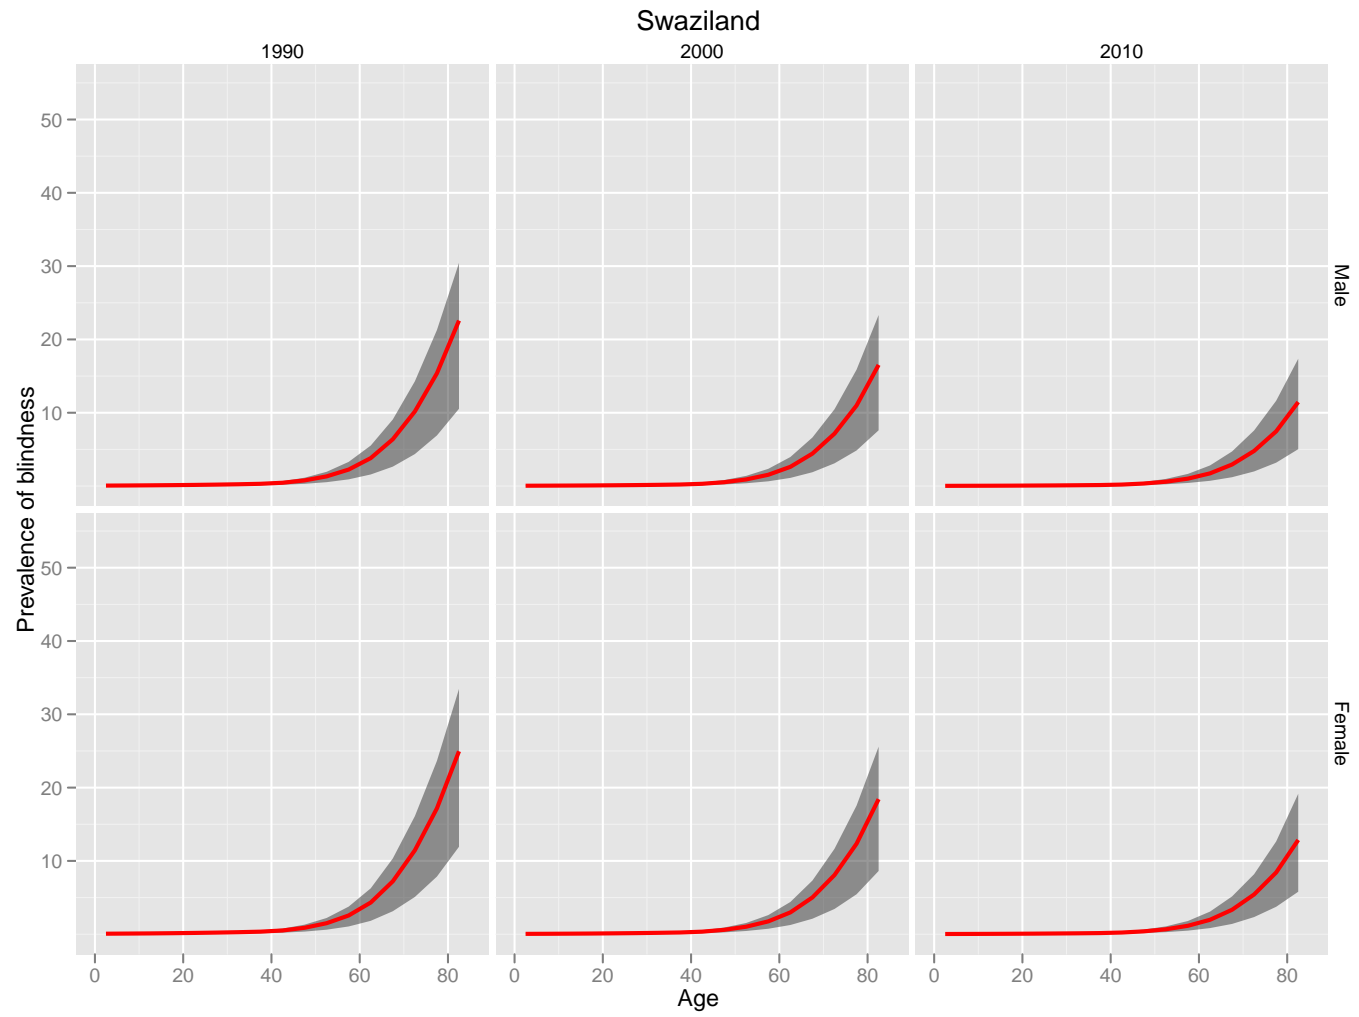

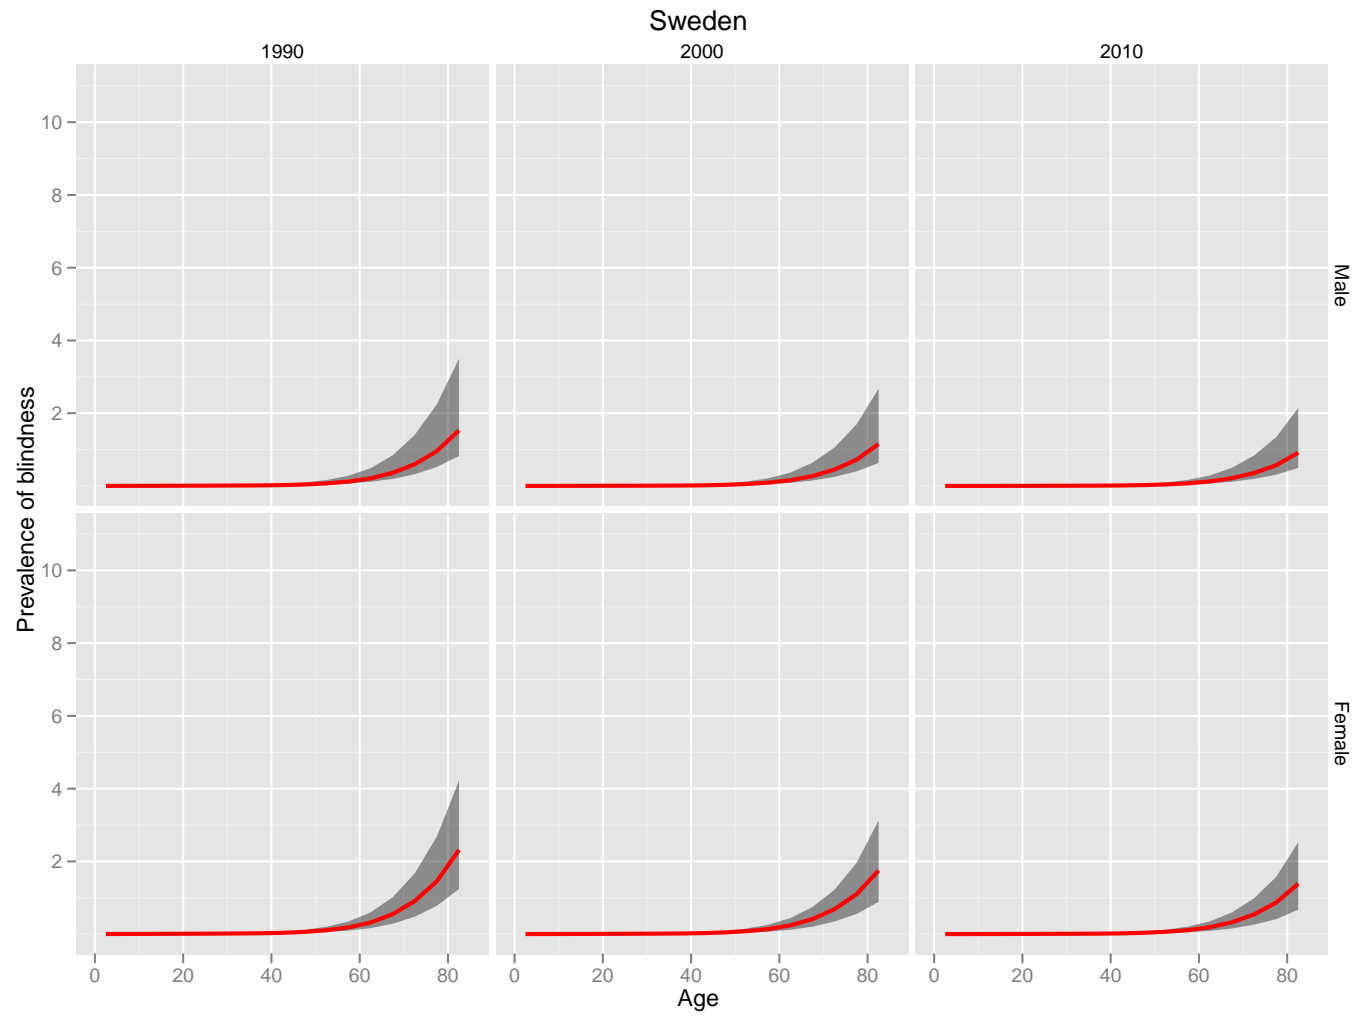

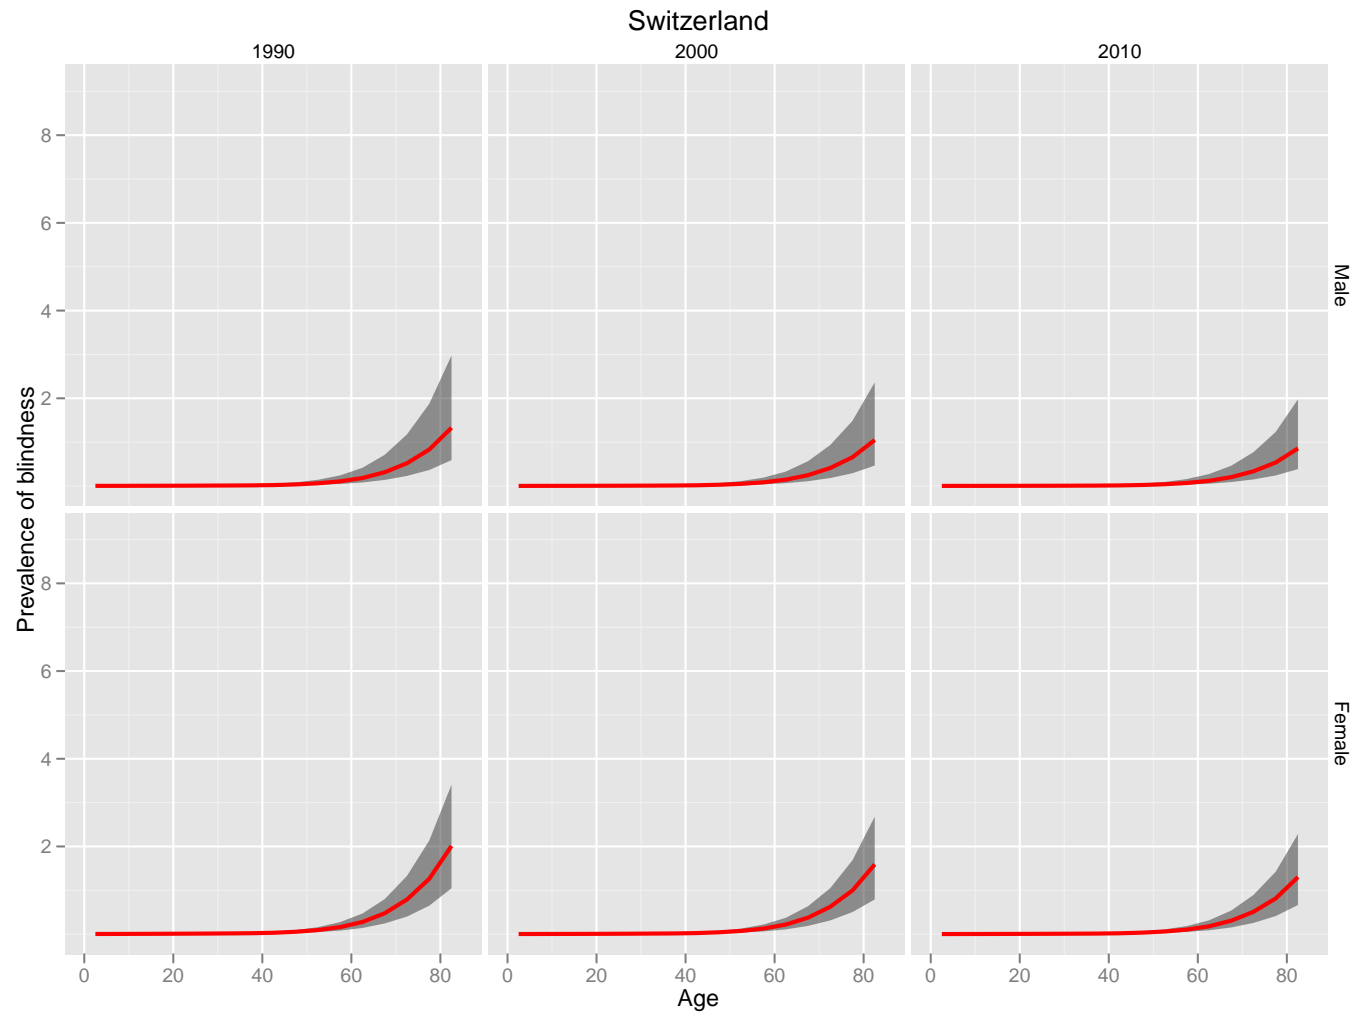

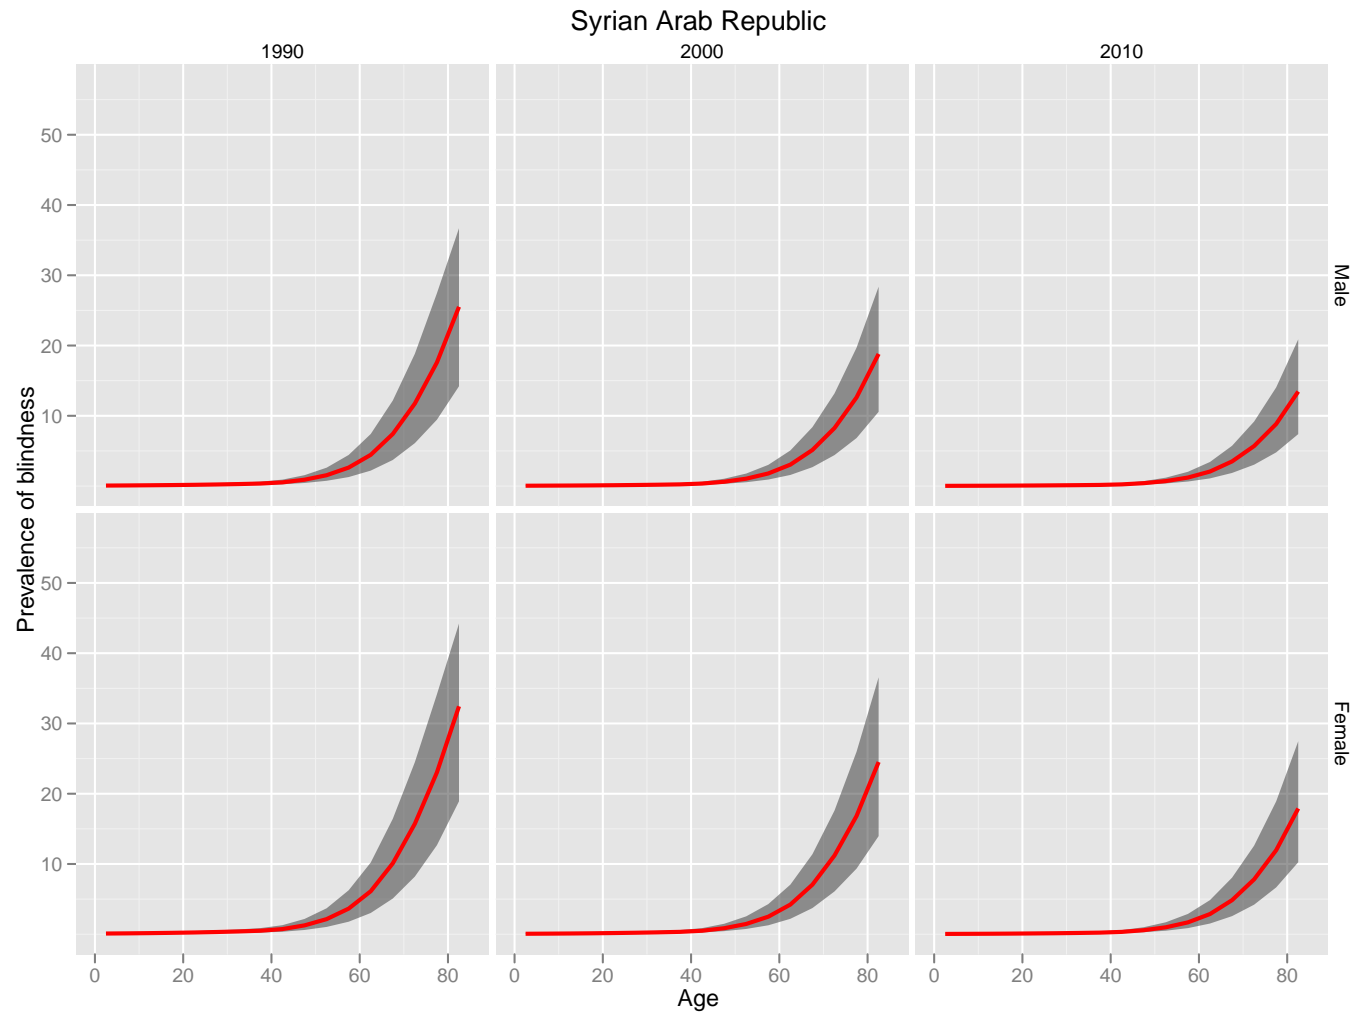

# São Tomé and Príncipe

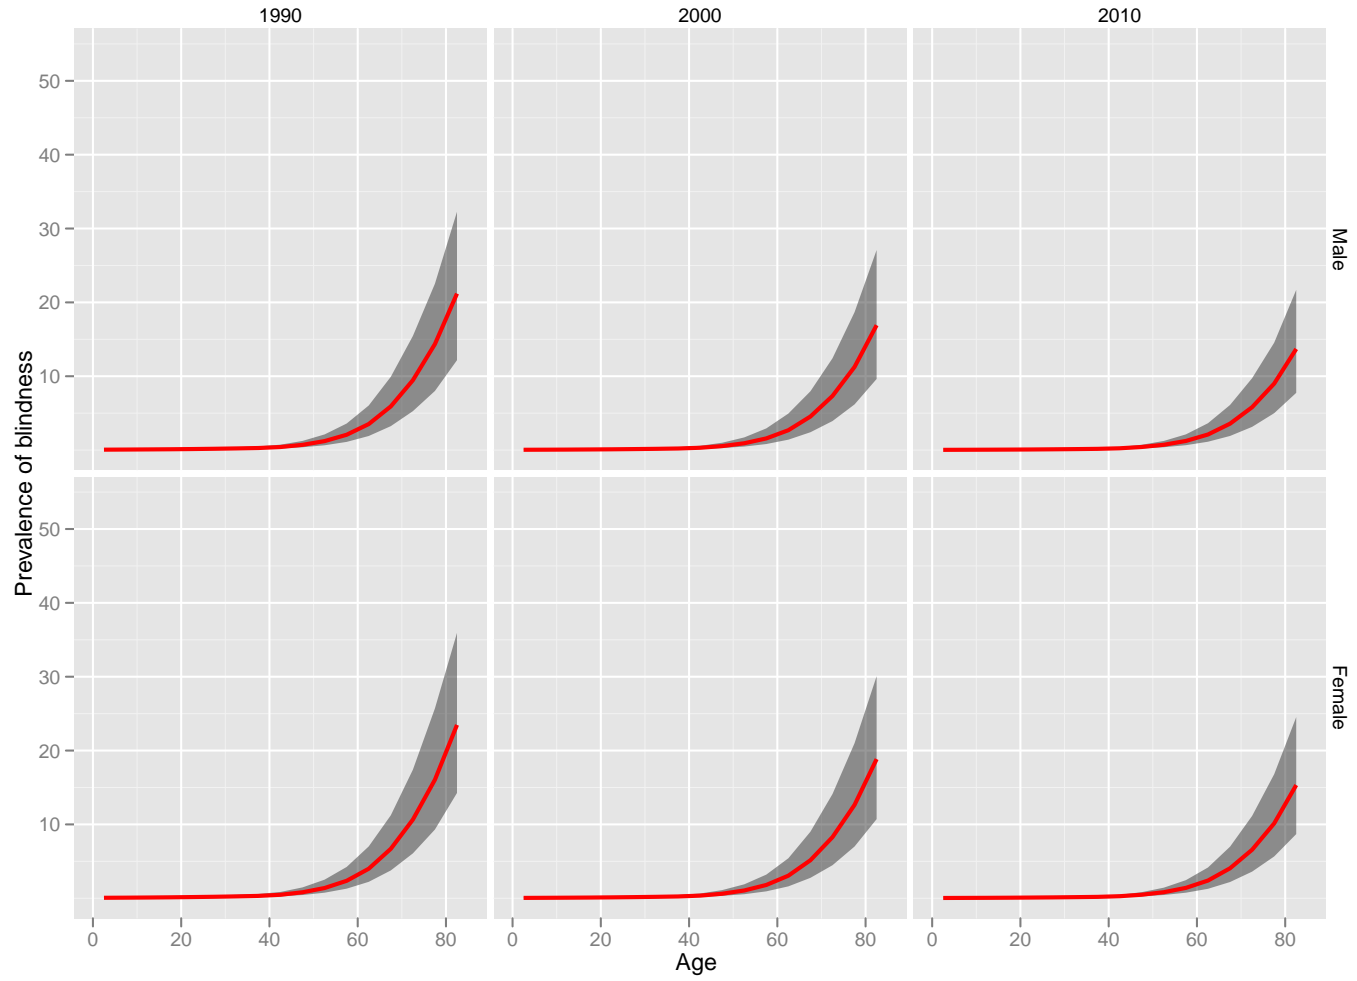



TFYR Macedonia

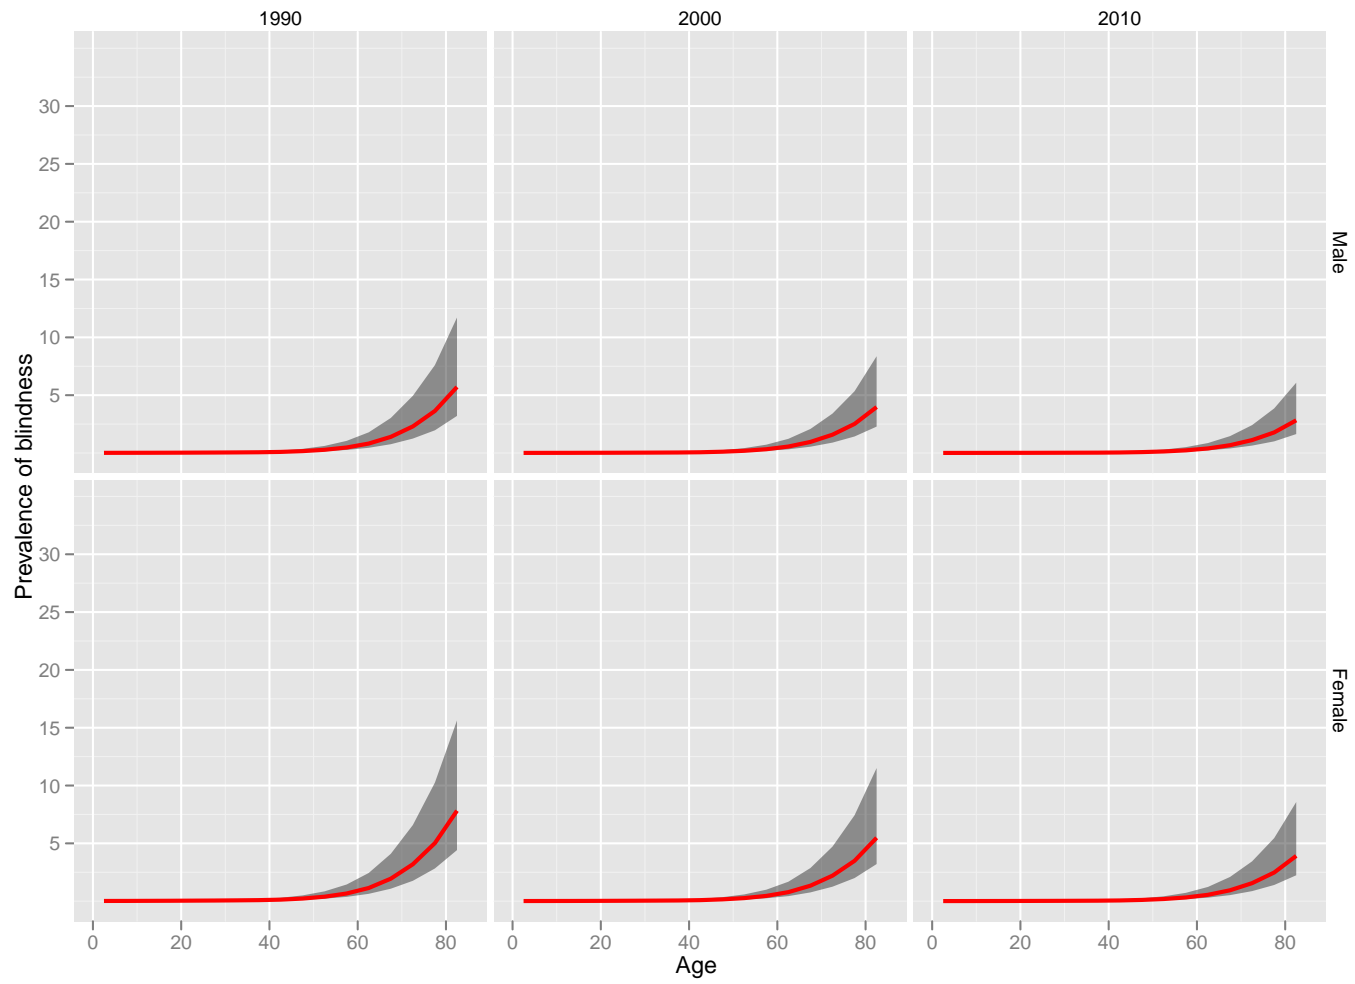

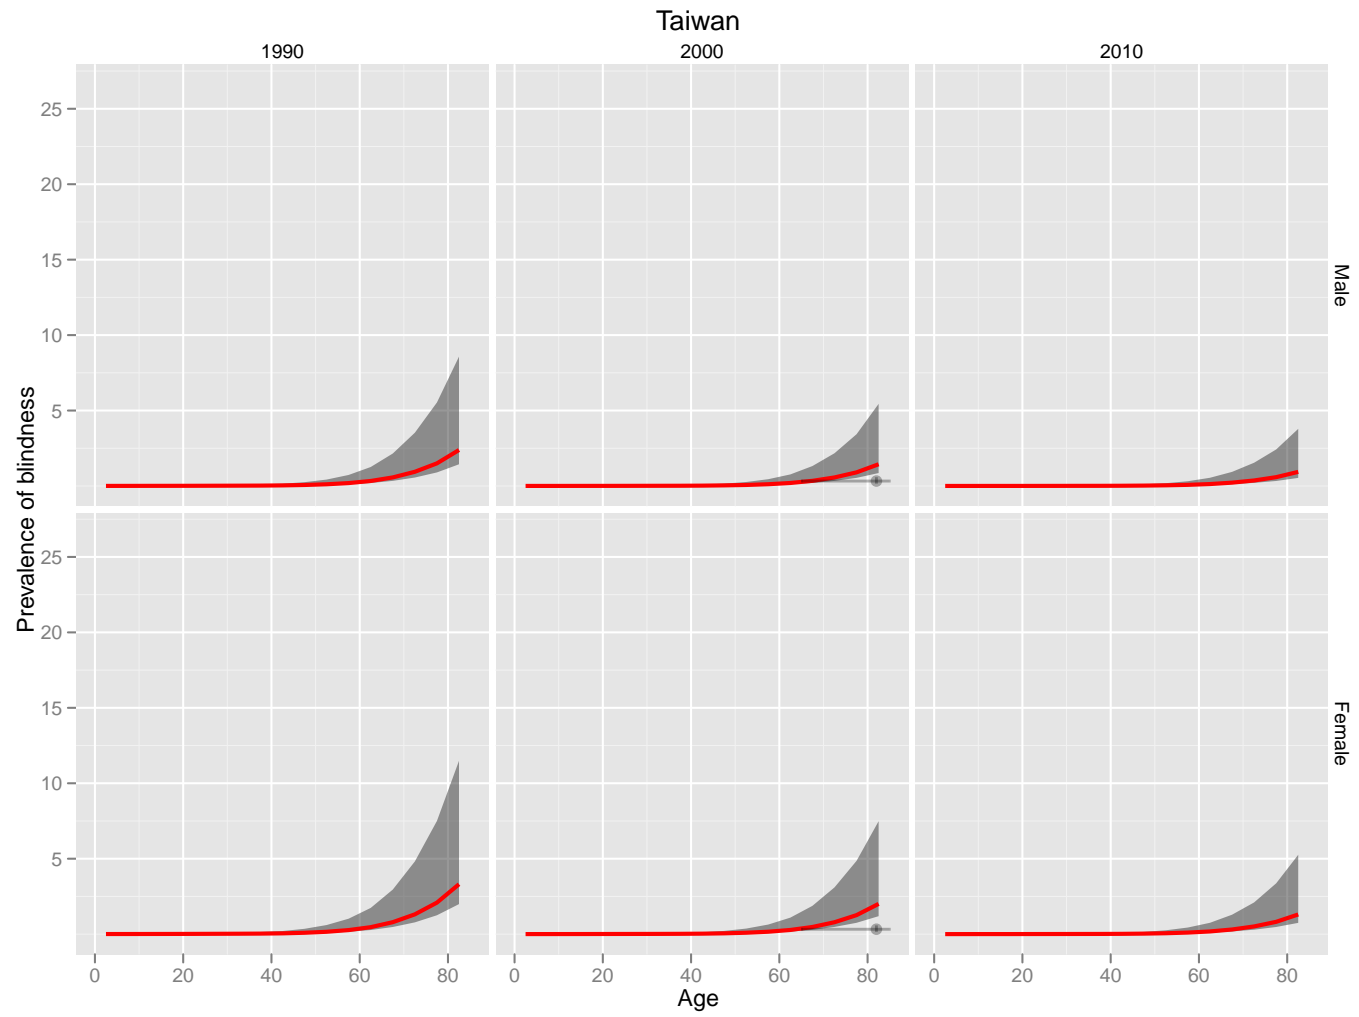

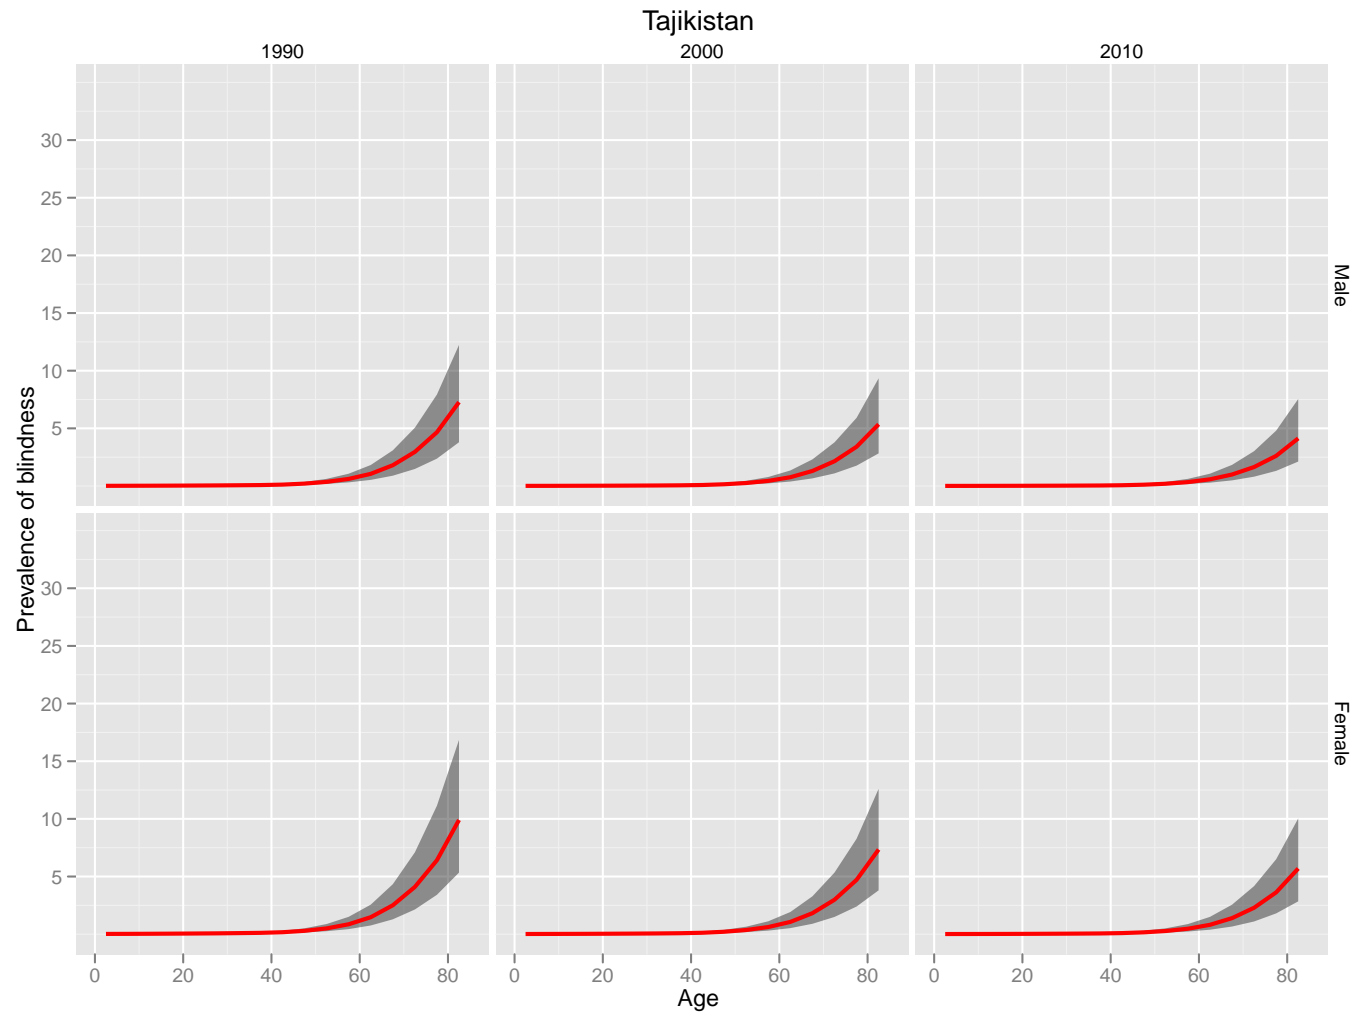

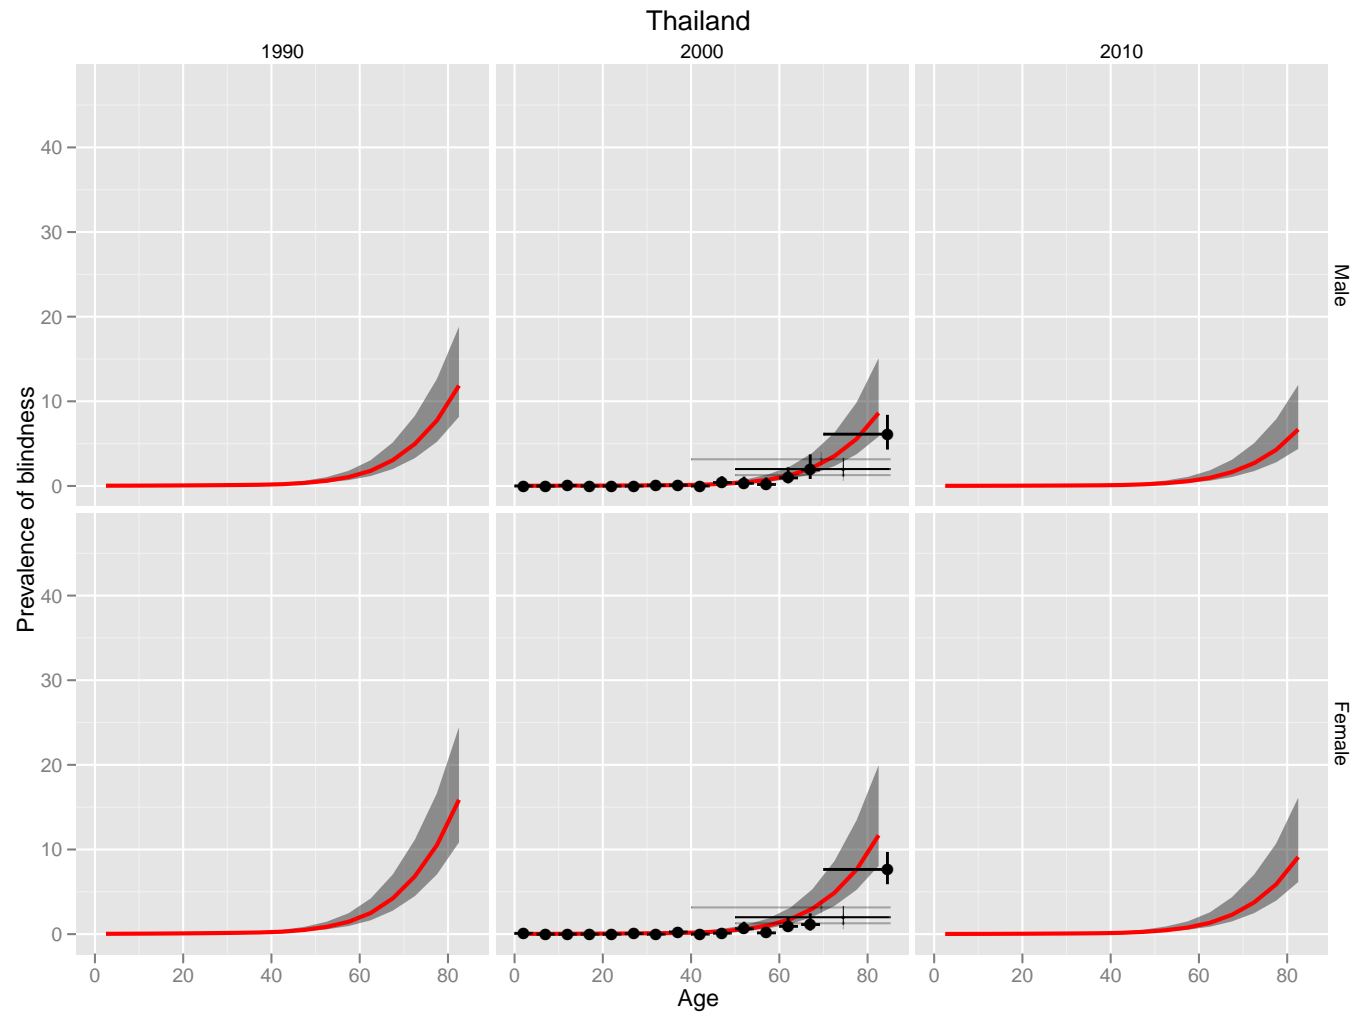

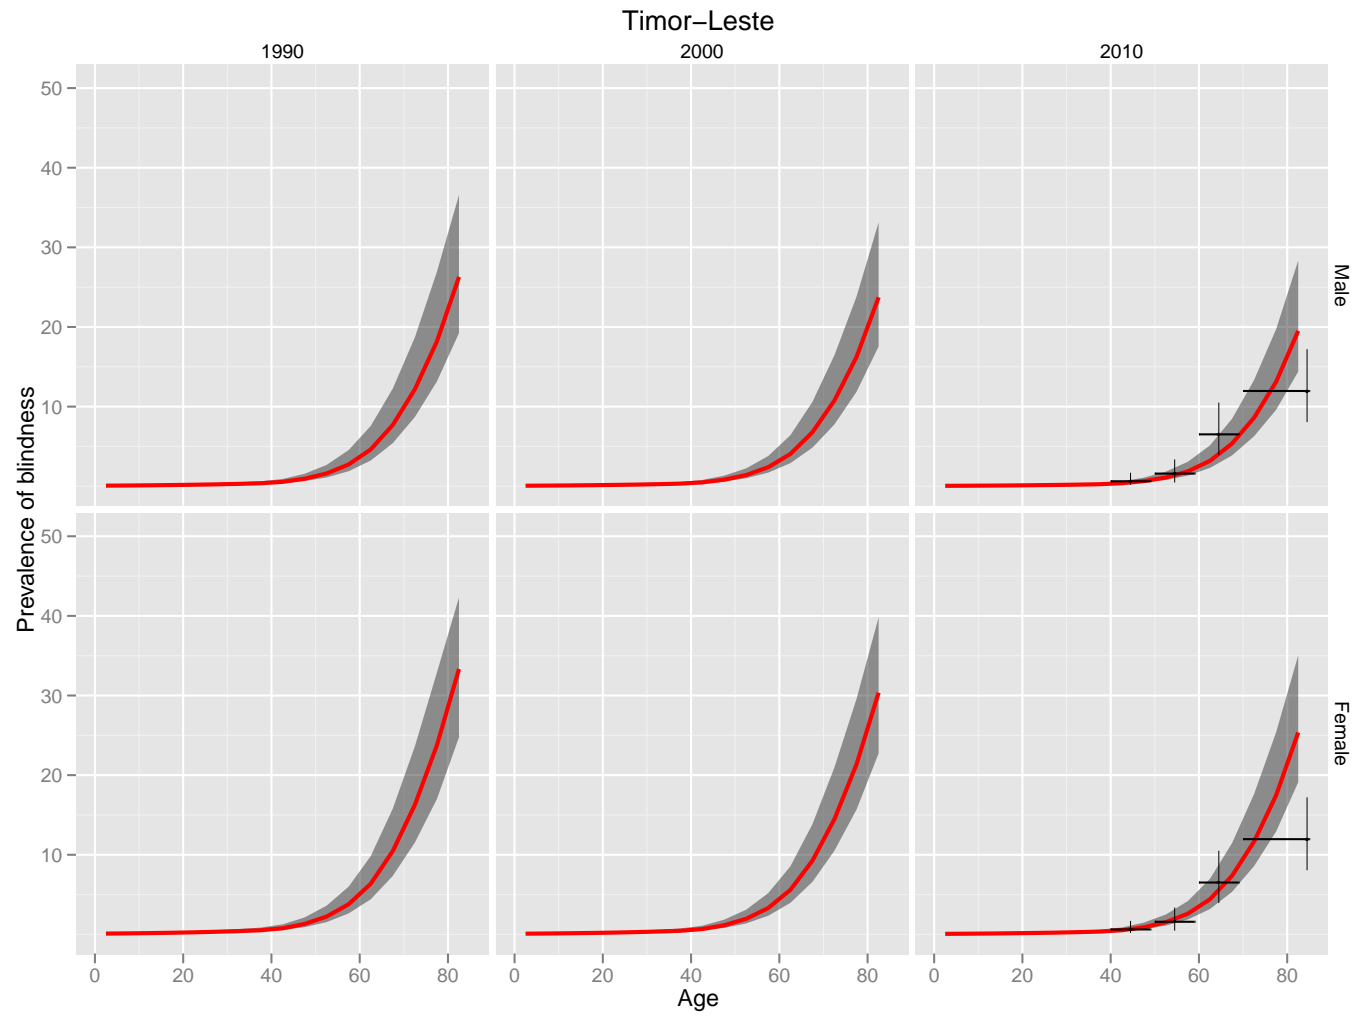

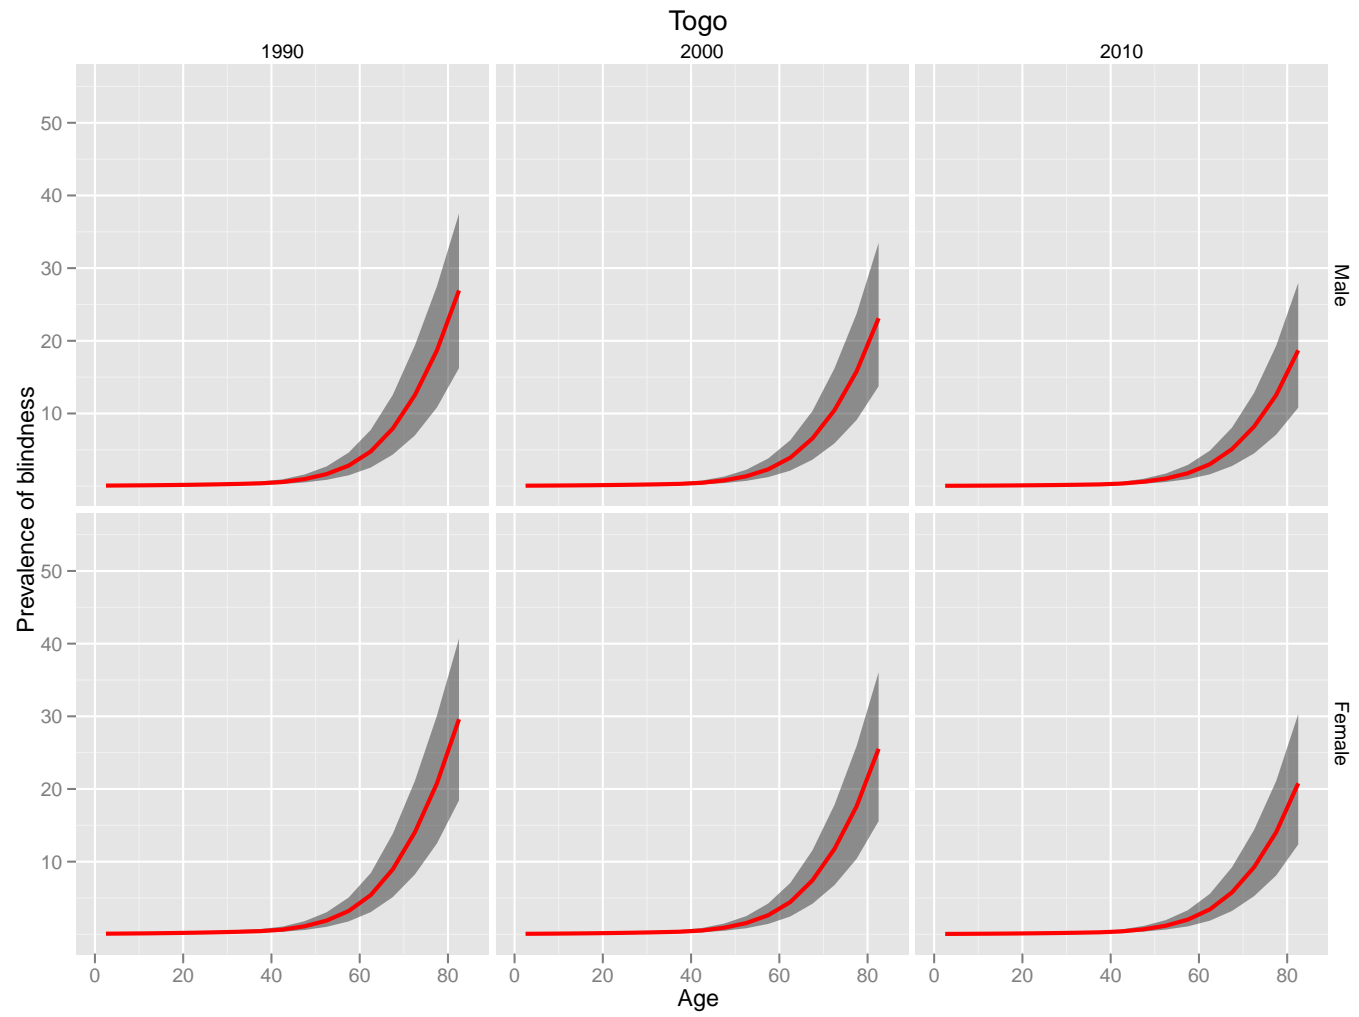

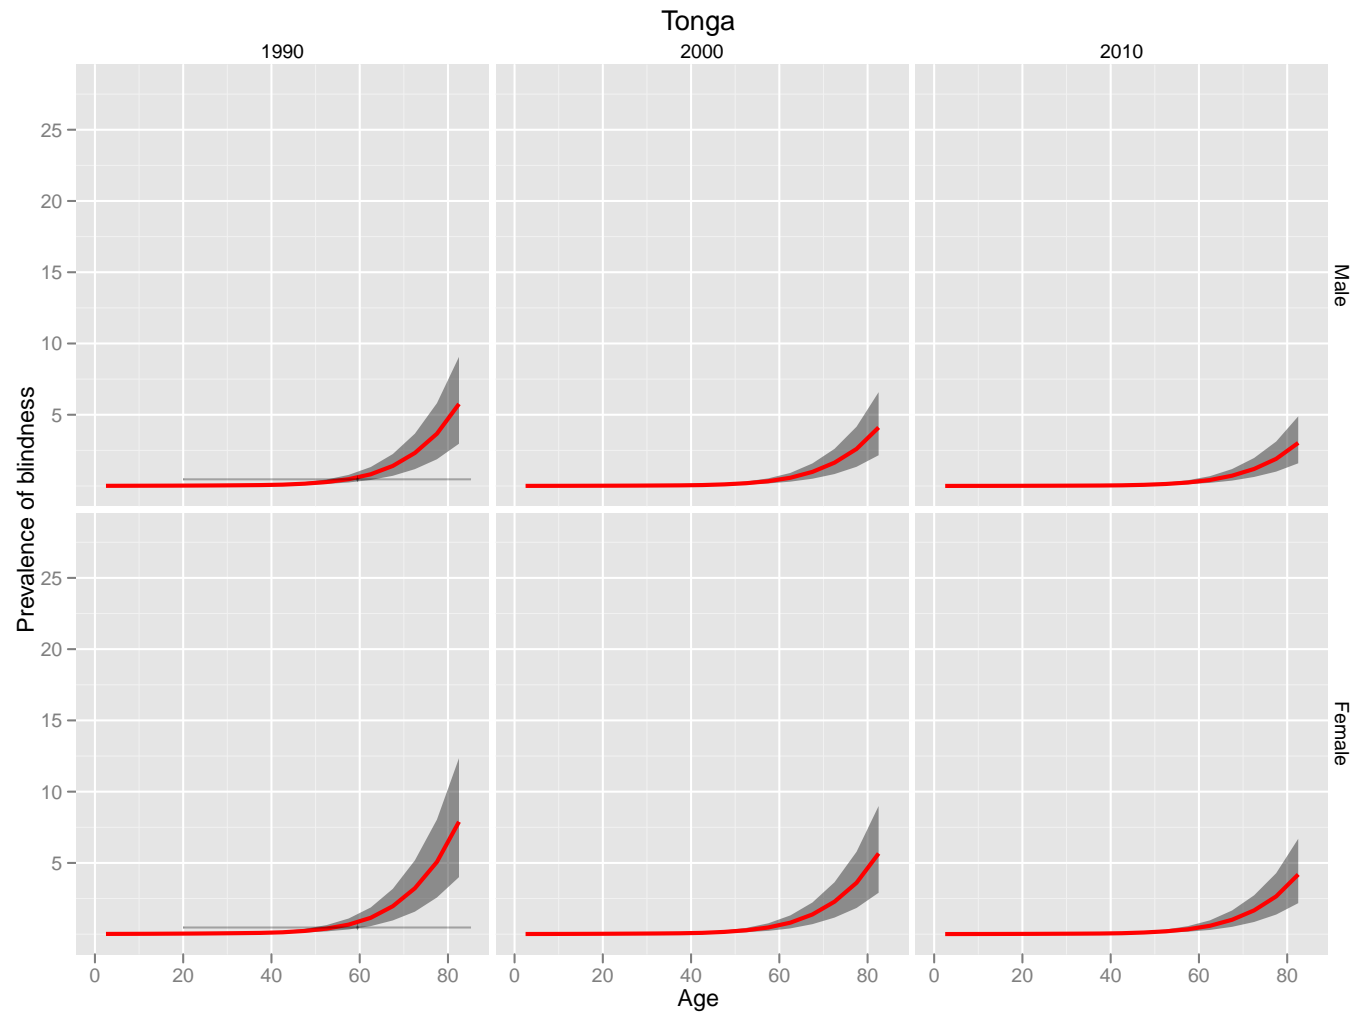

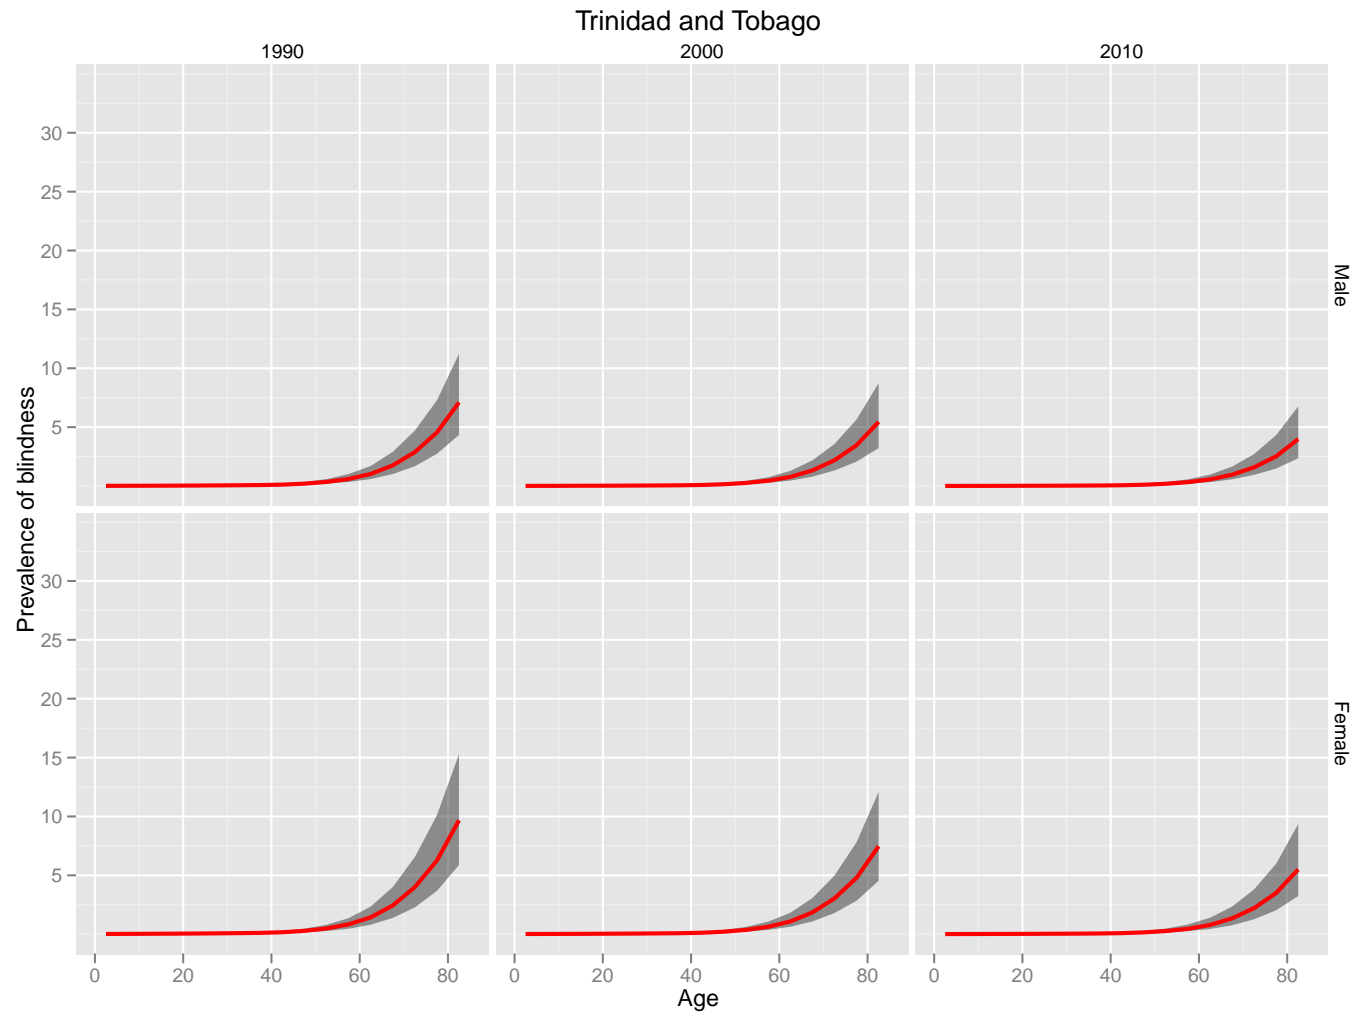



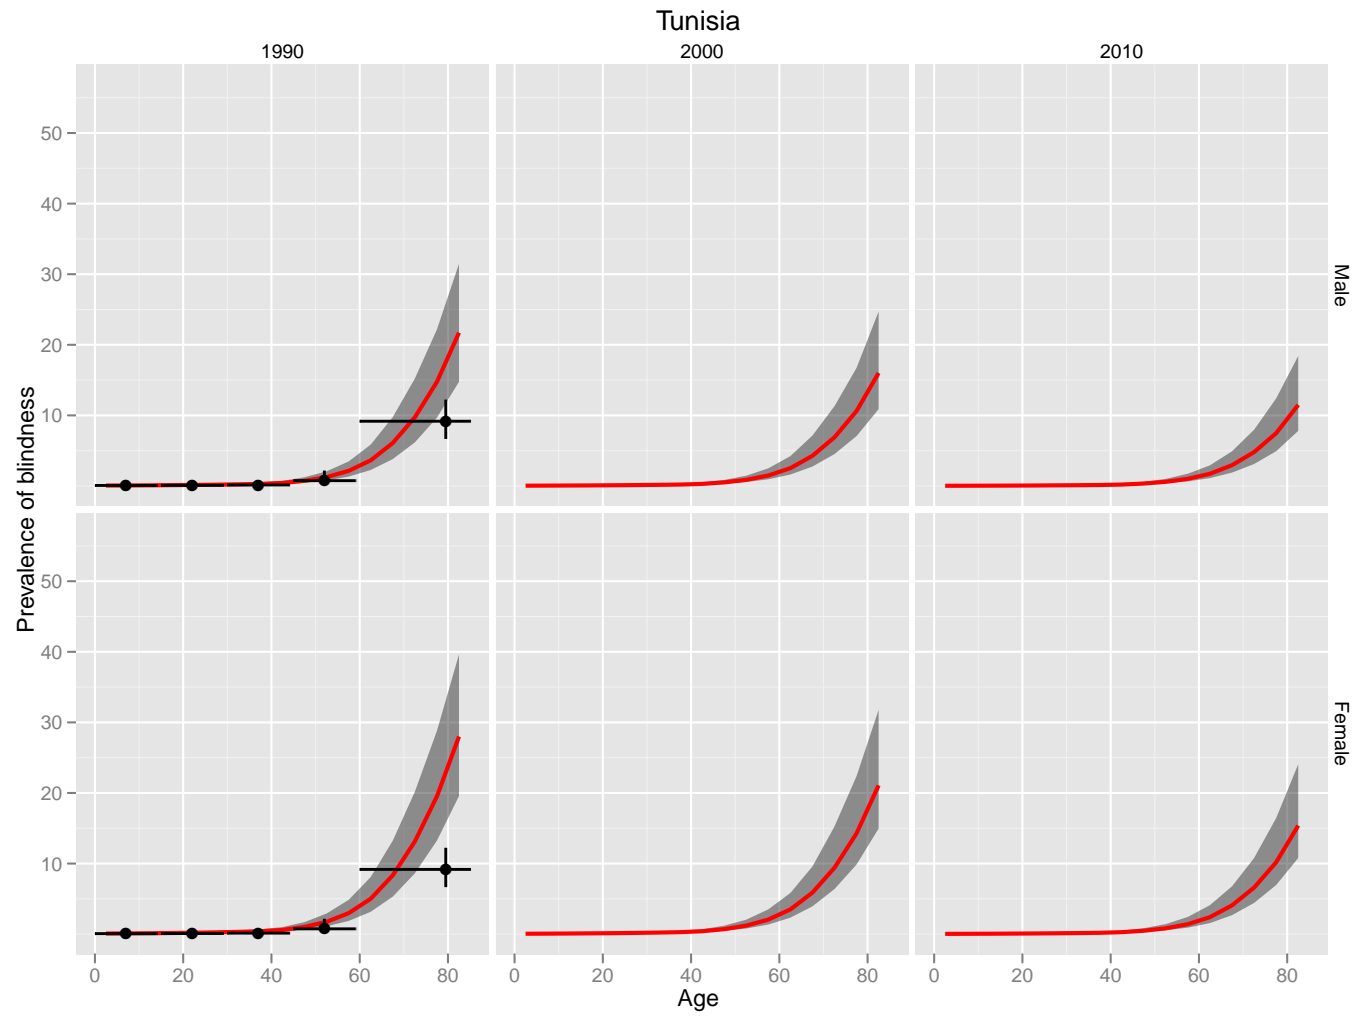

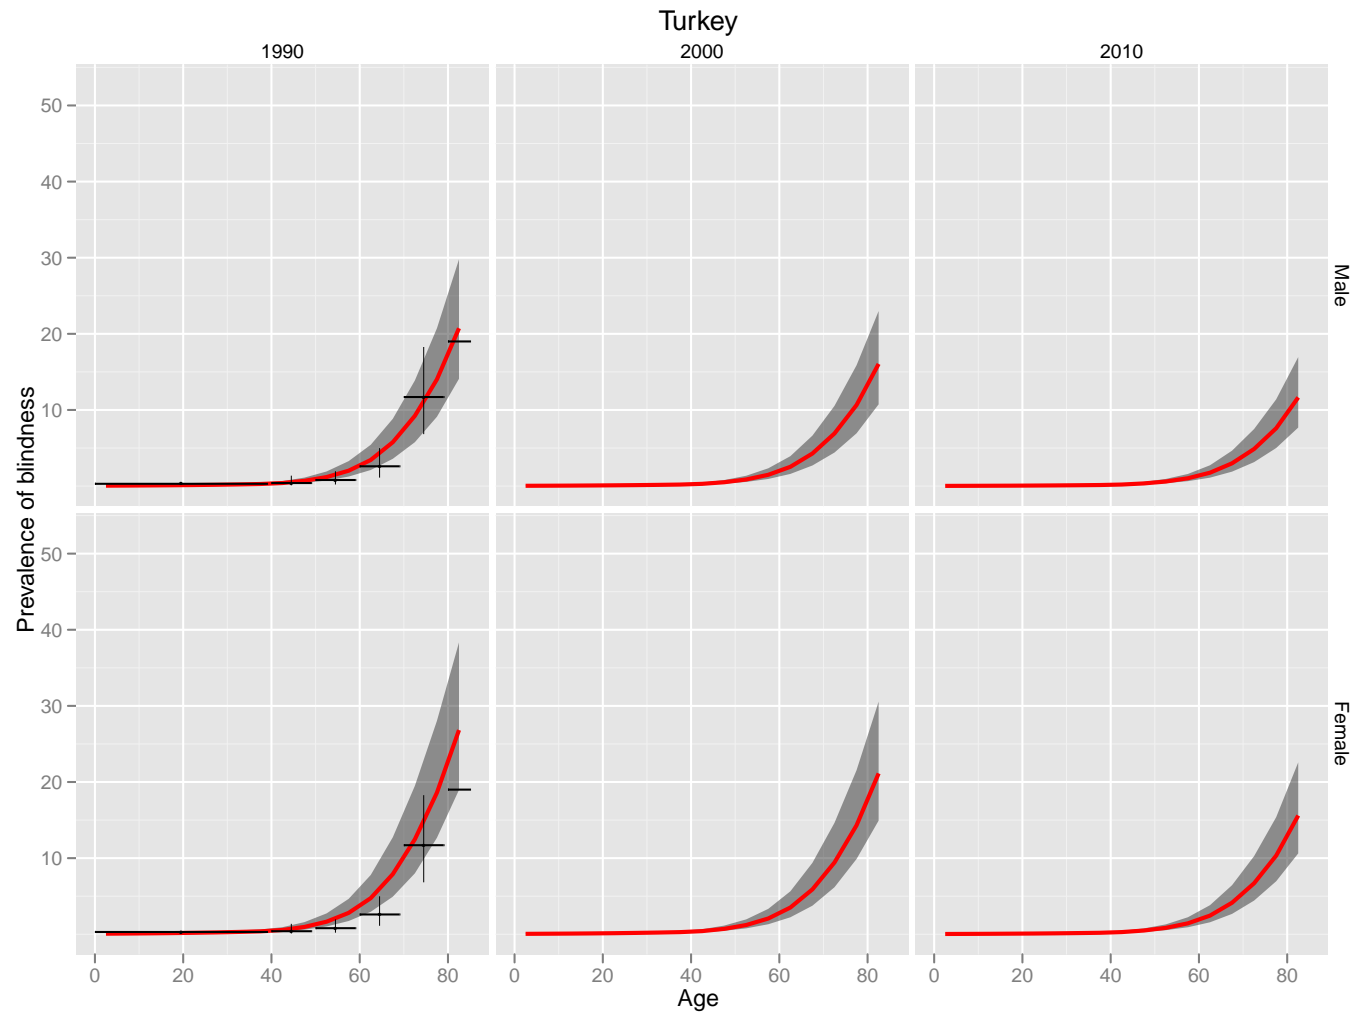

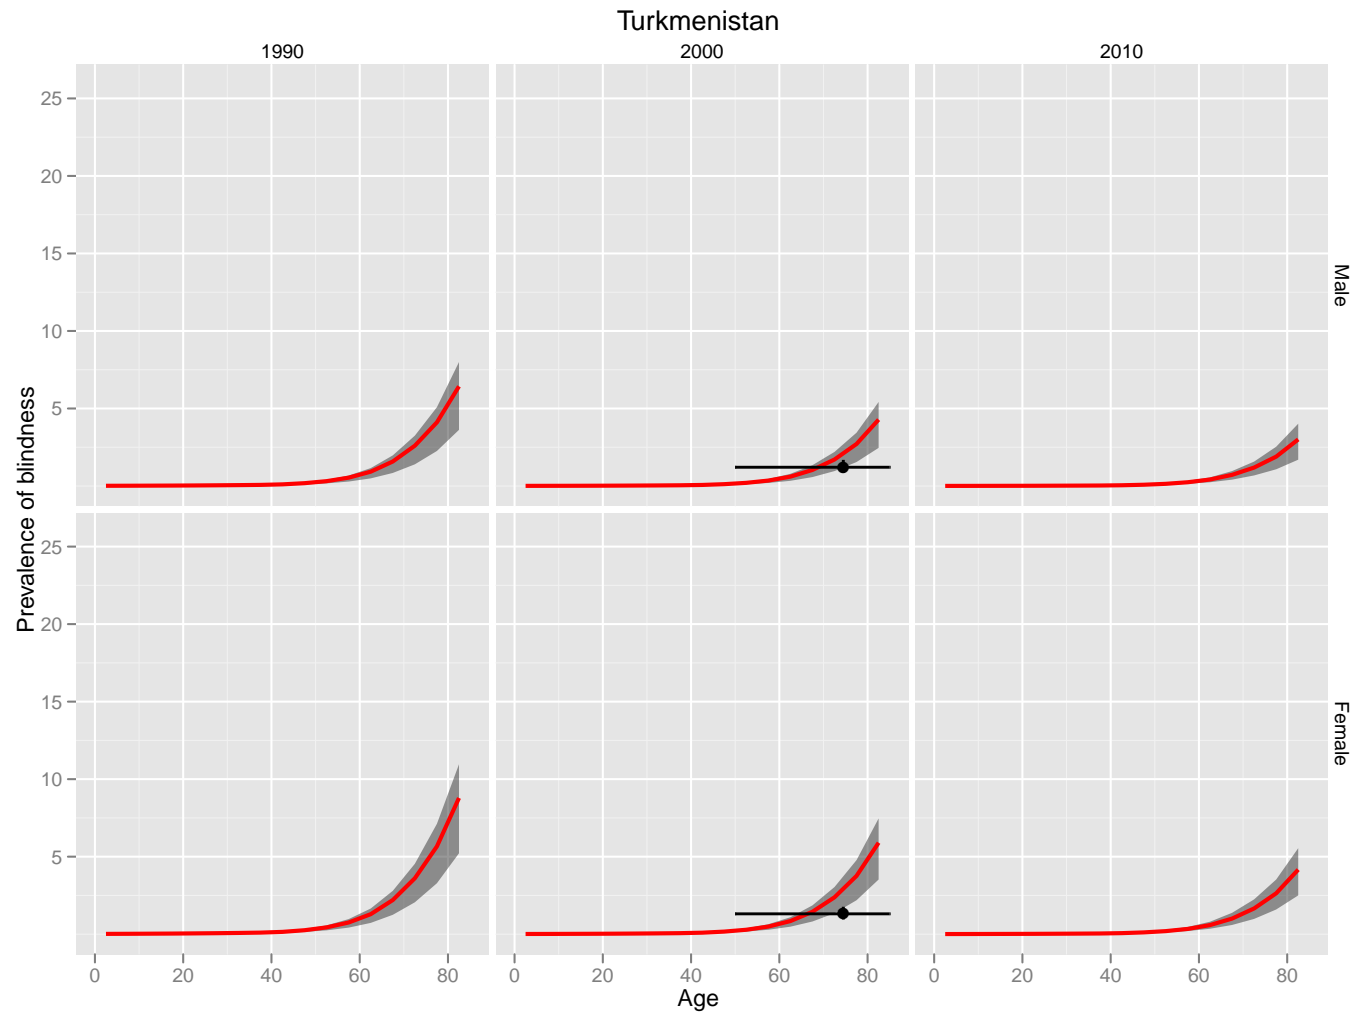

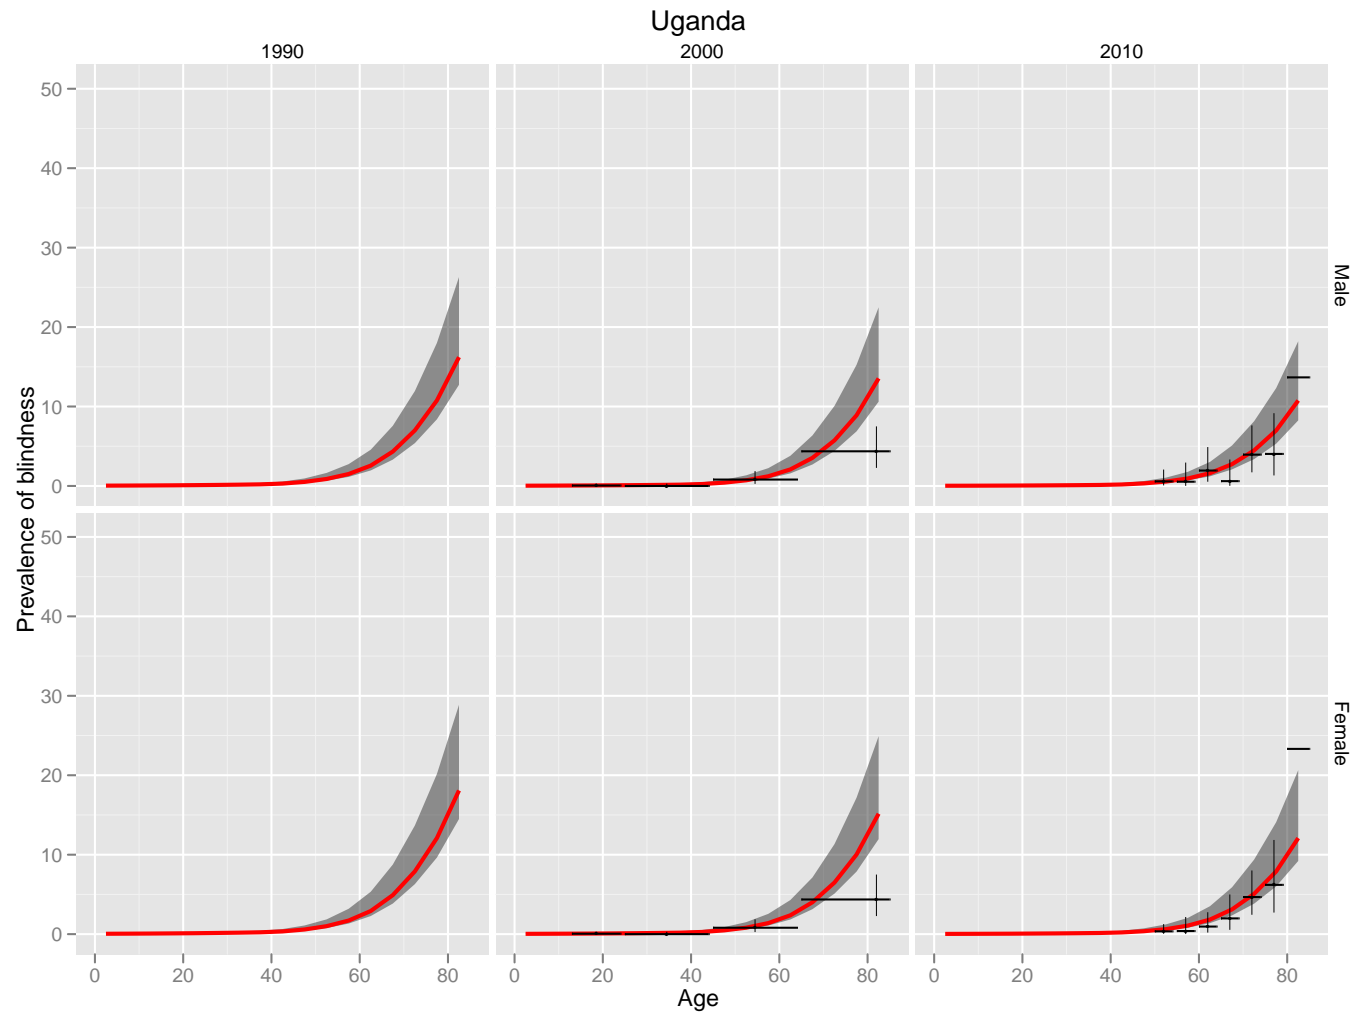

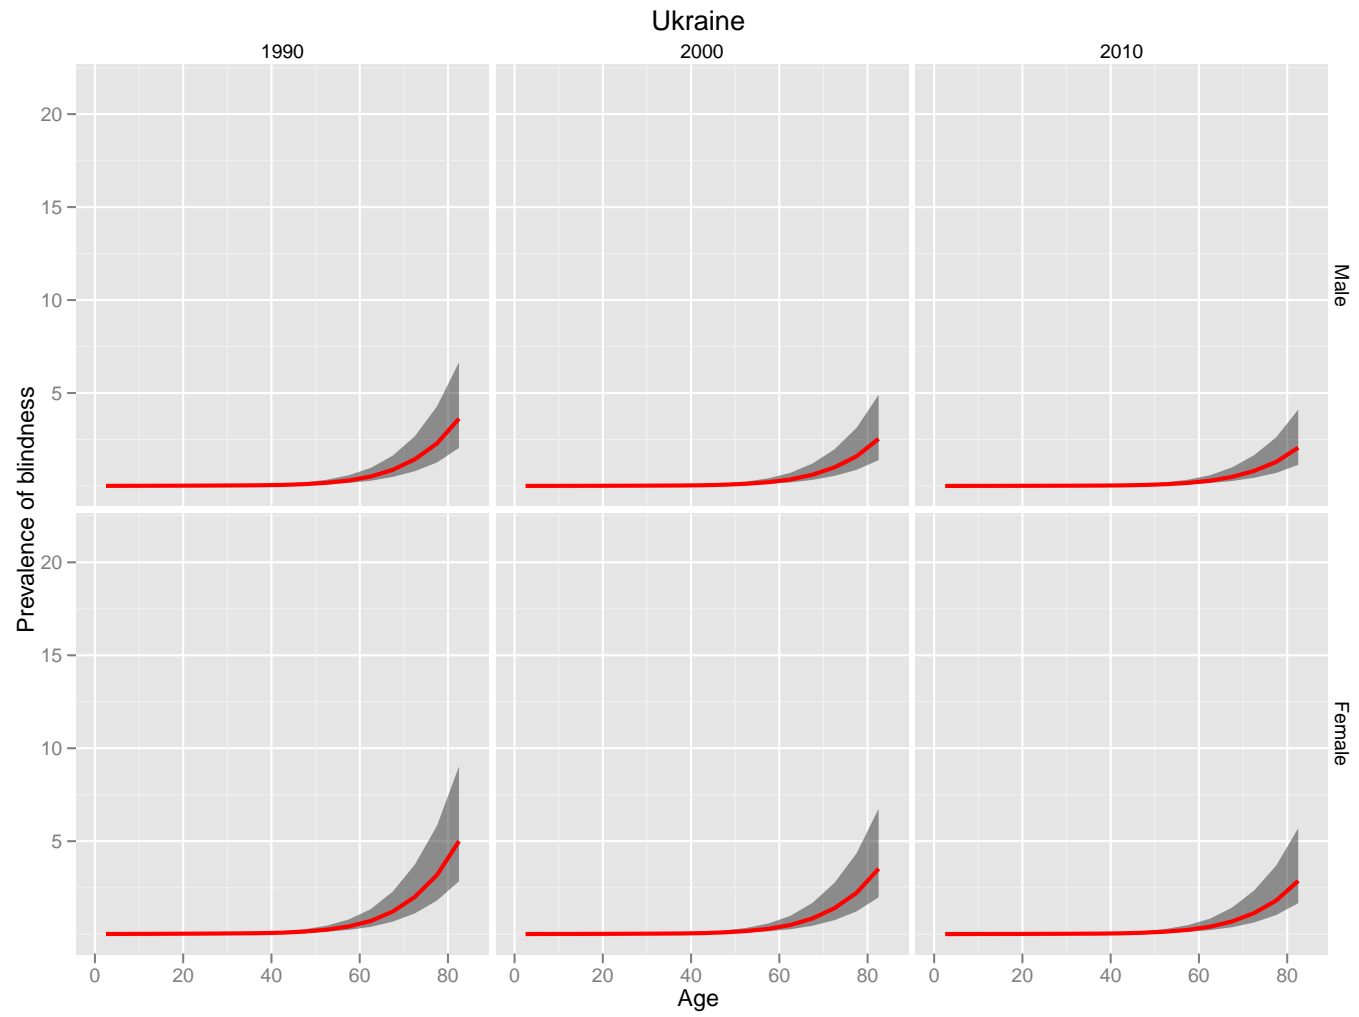

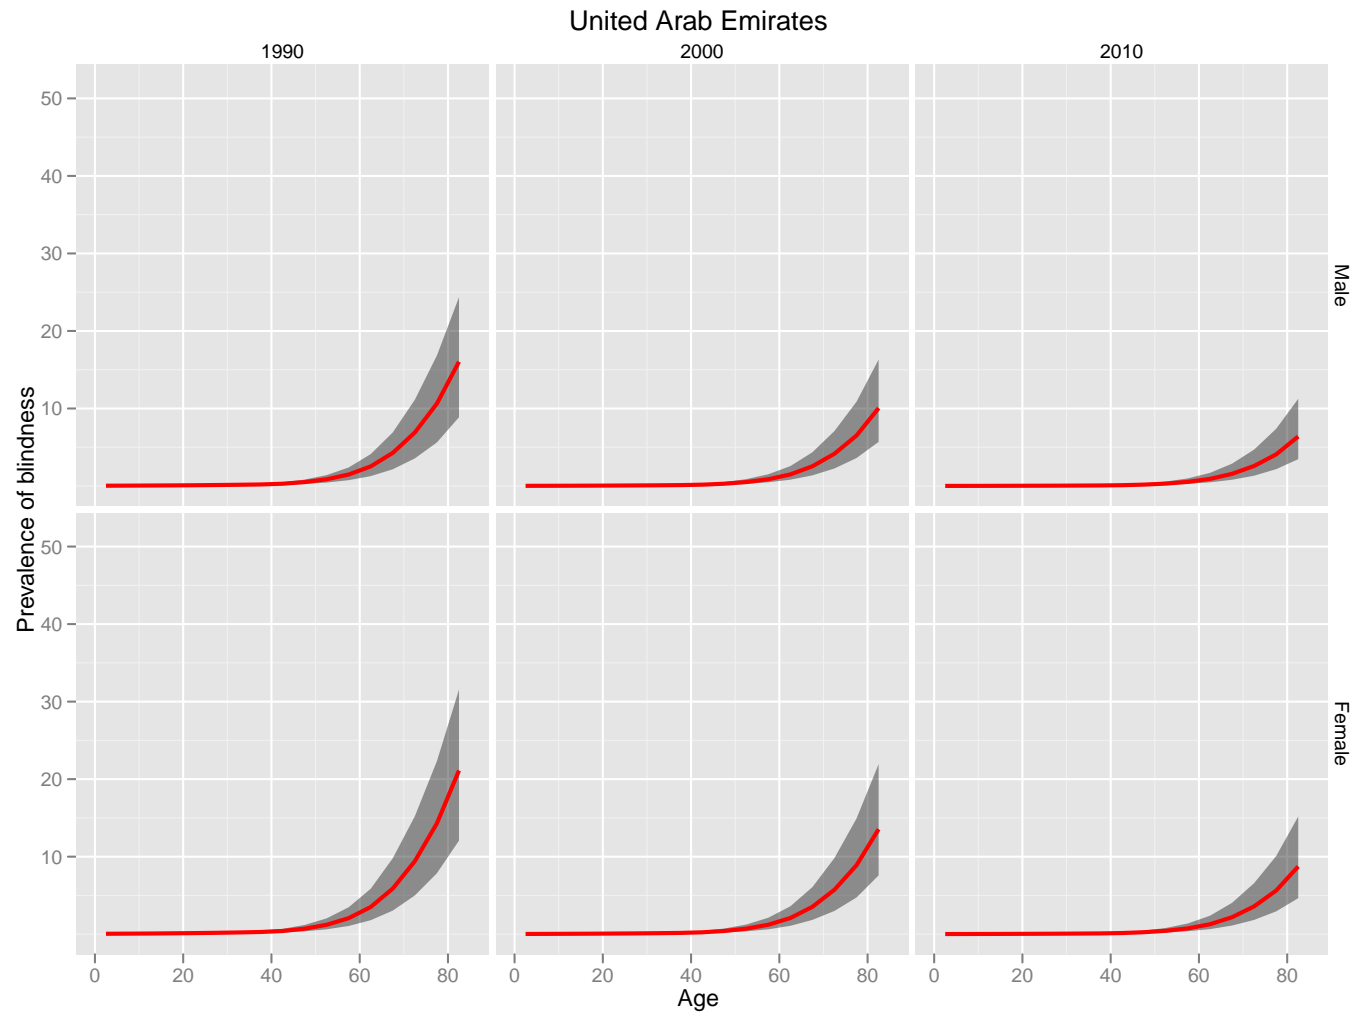

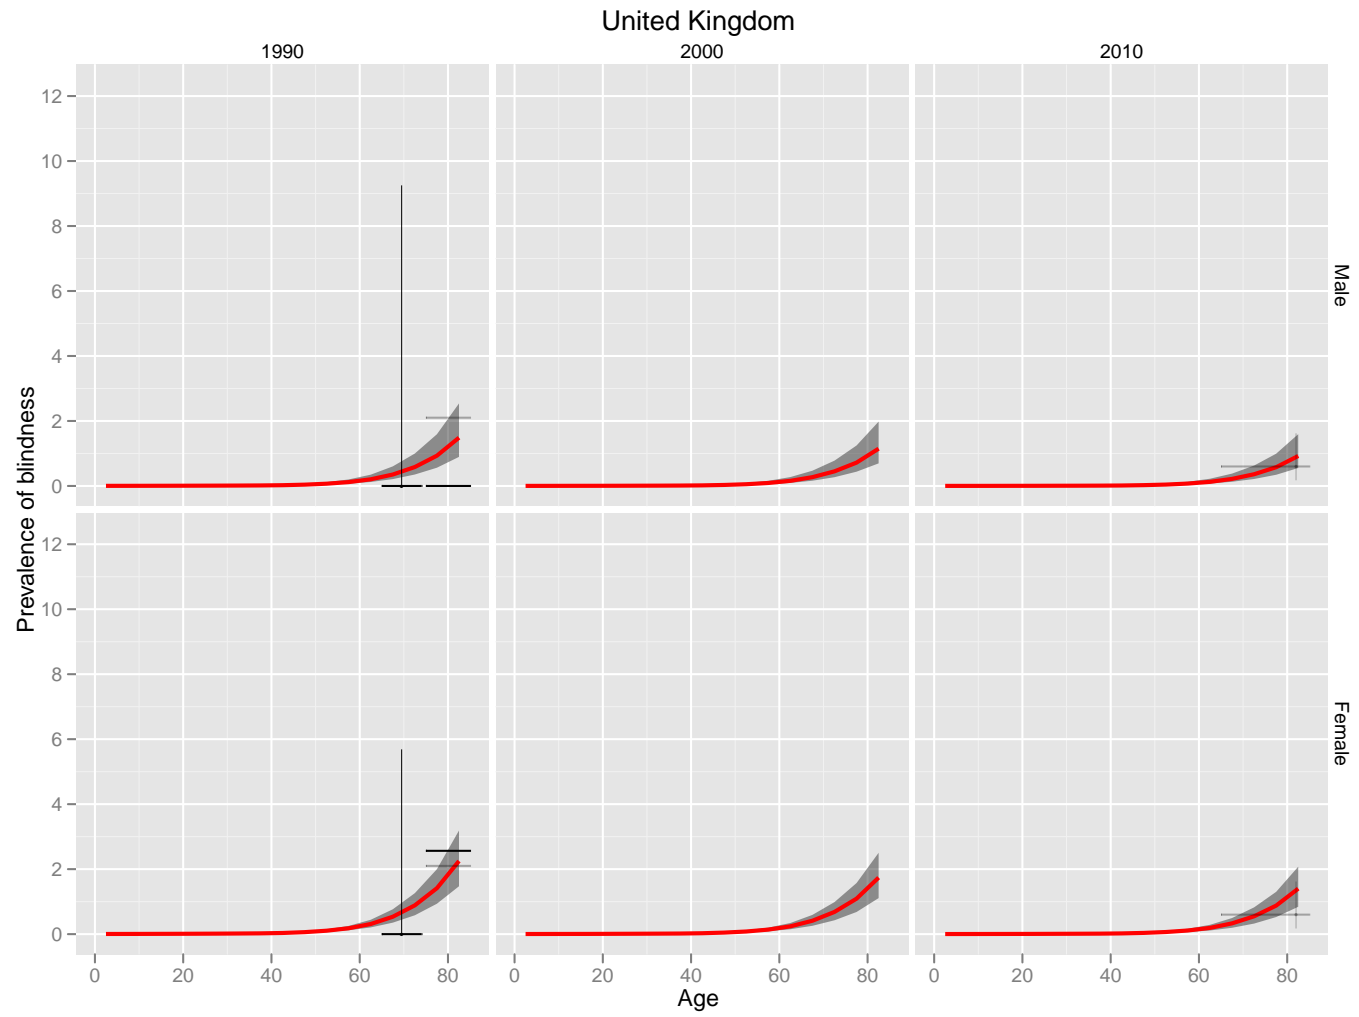

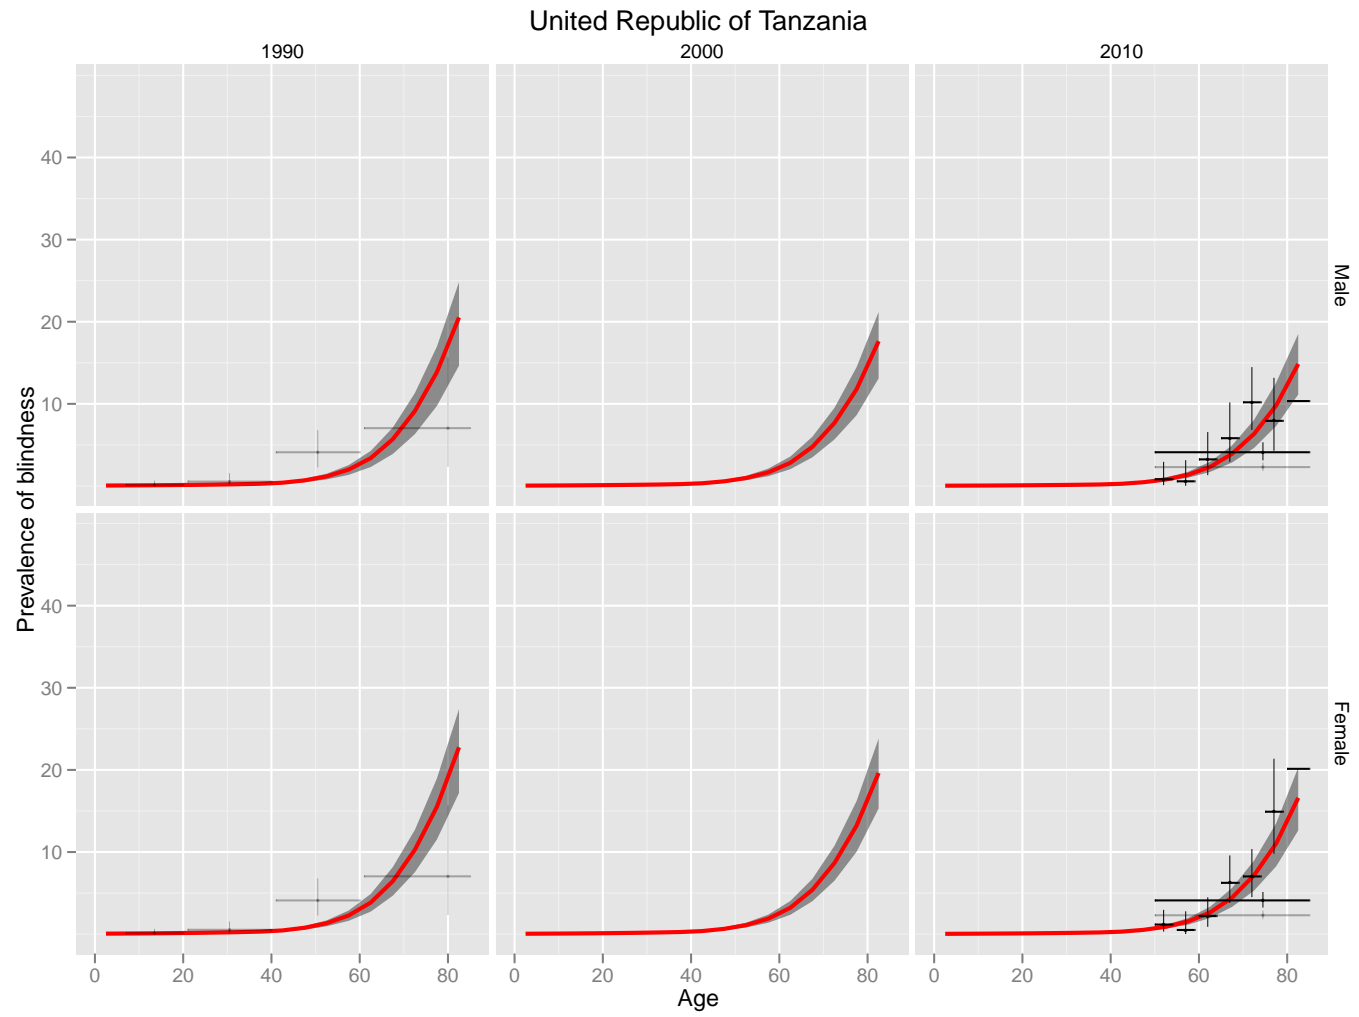



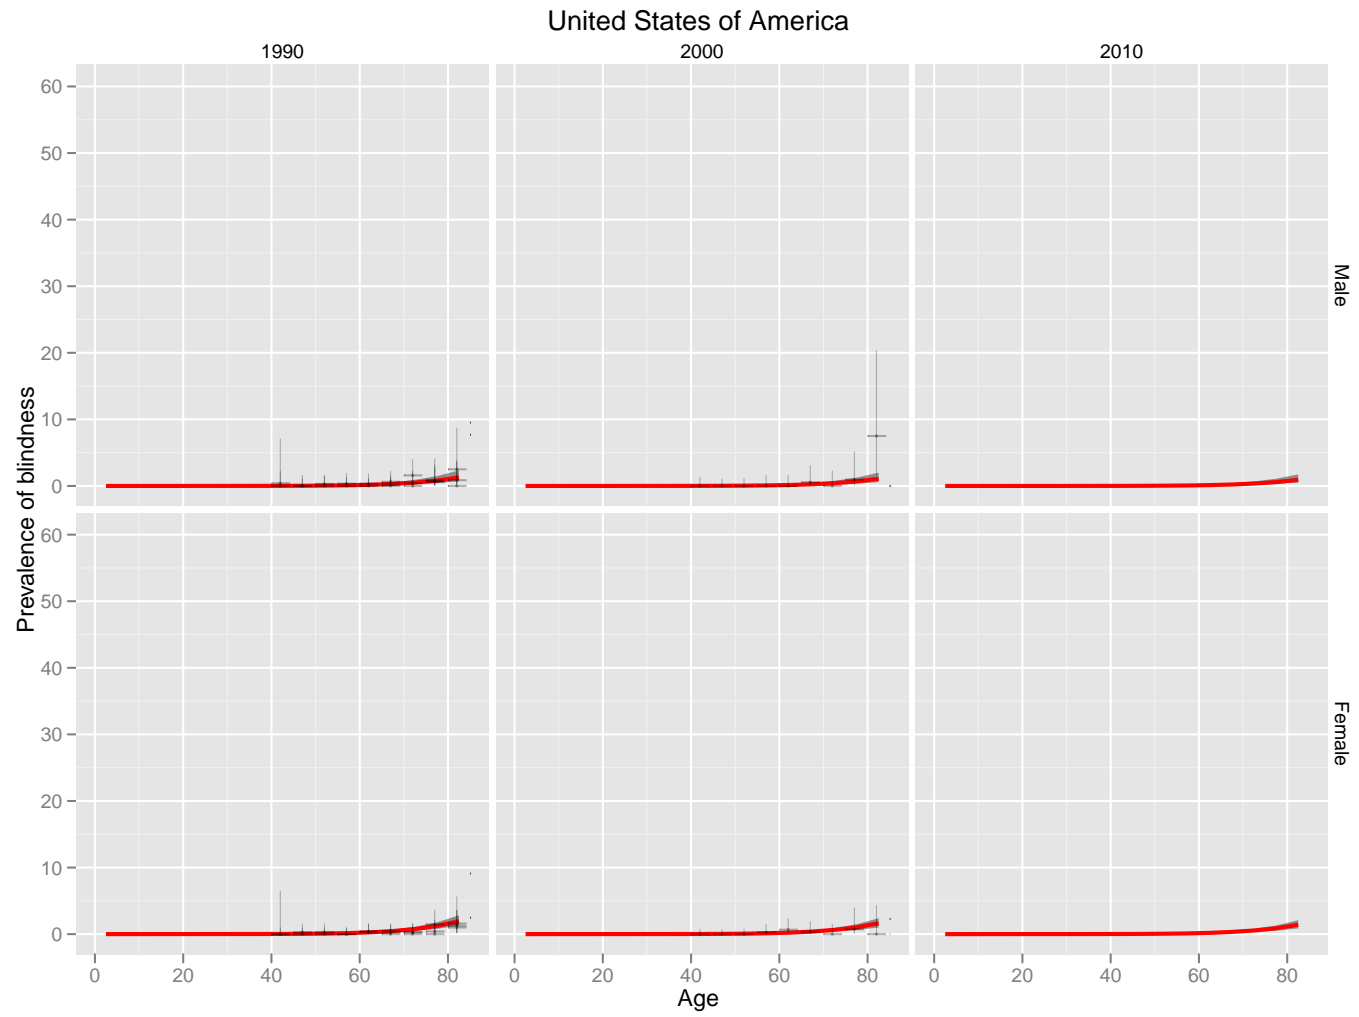

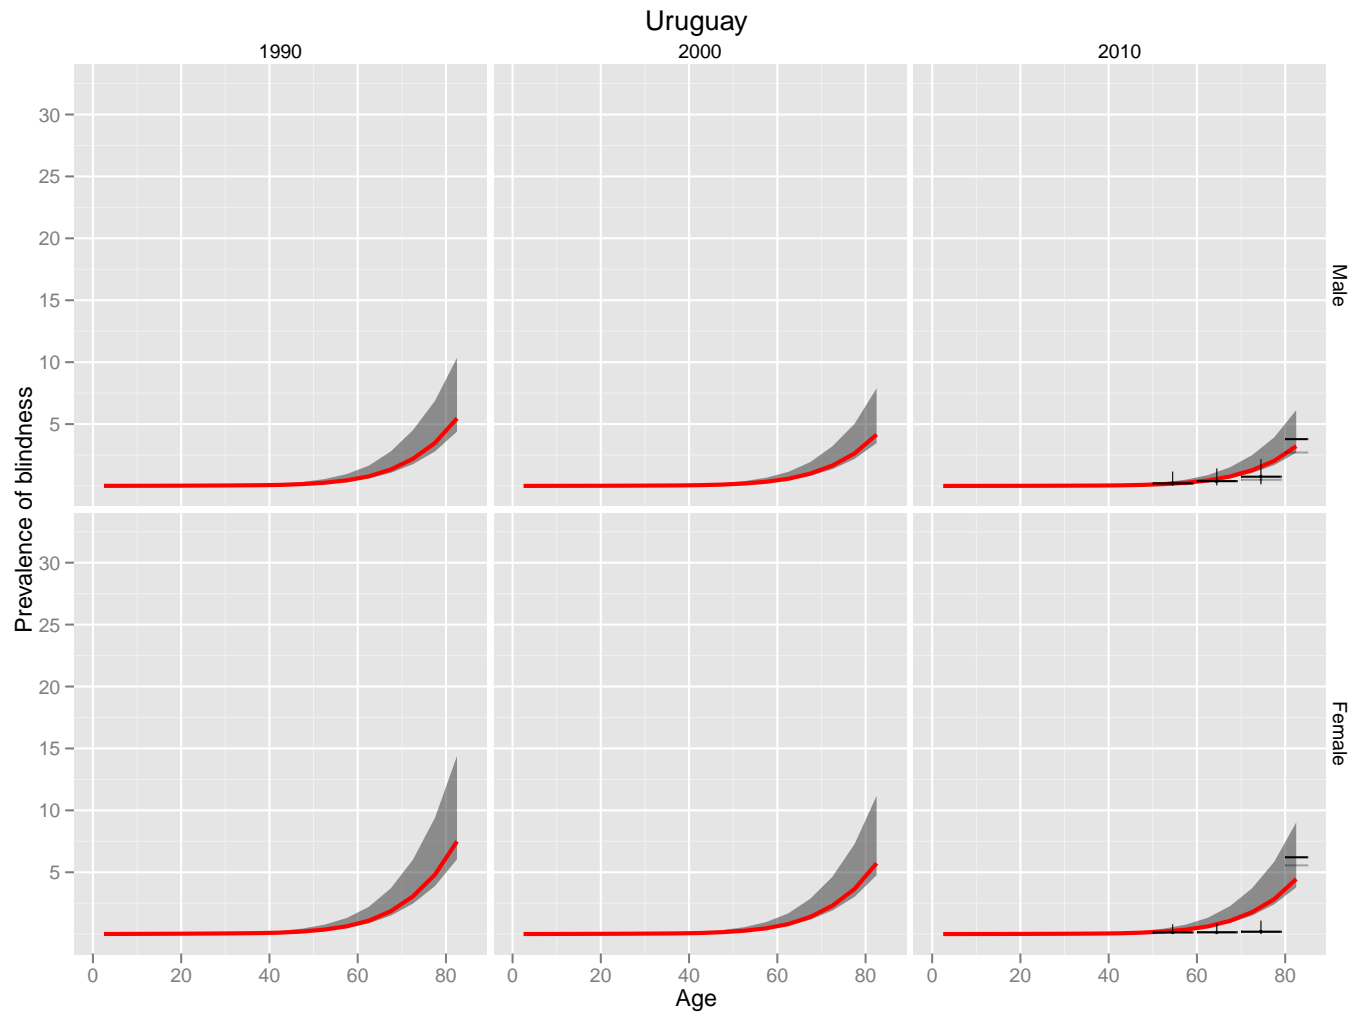

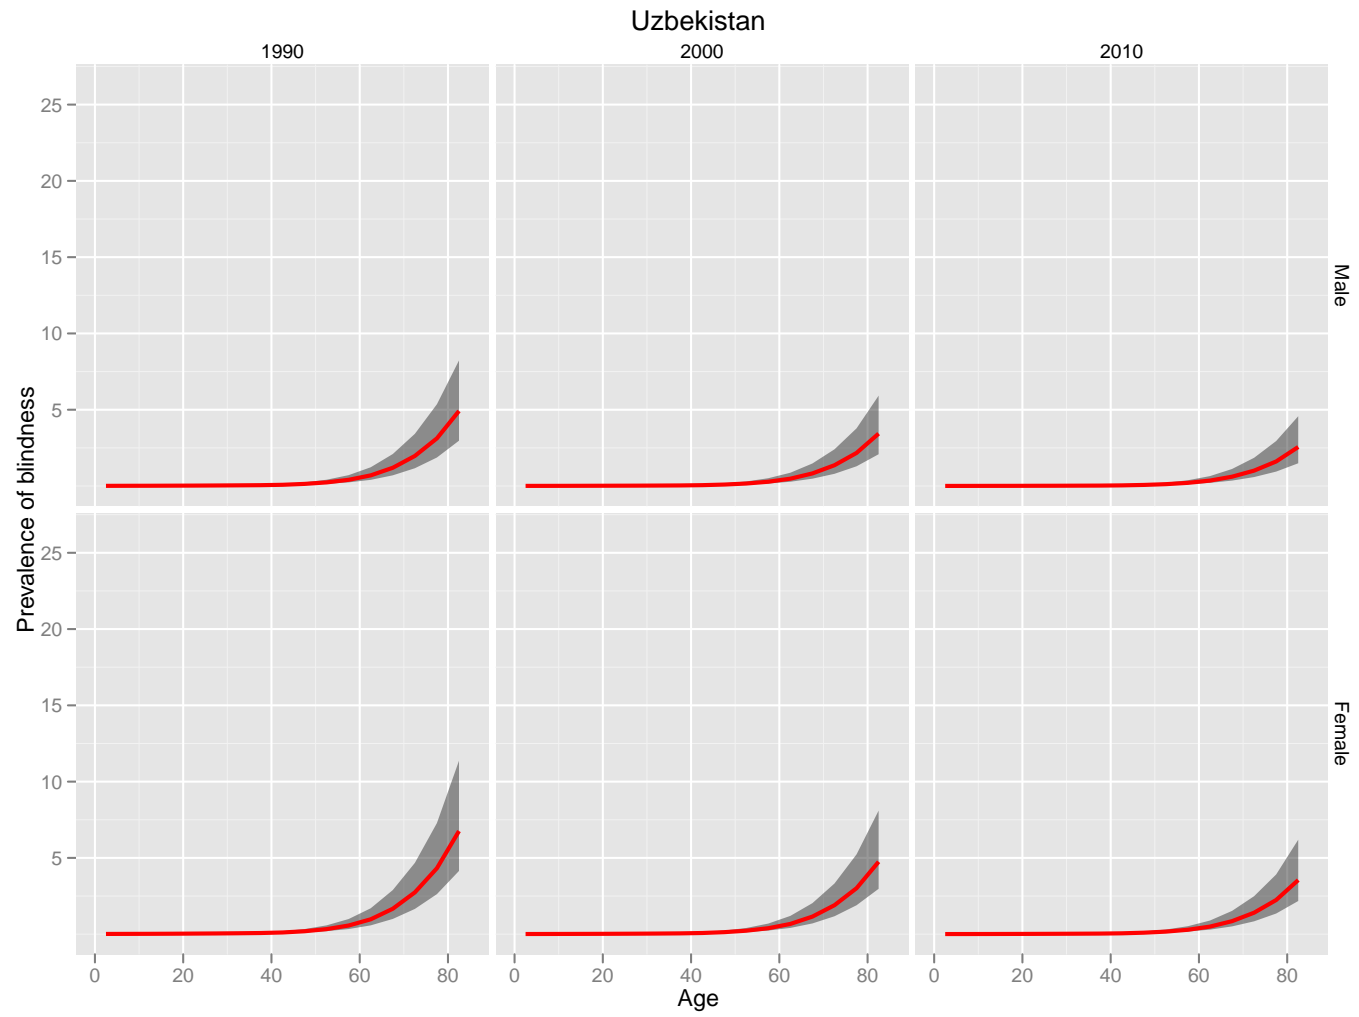

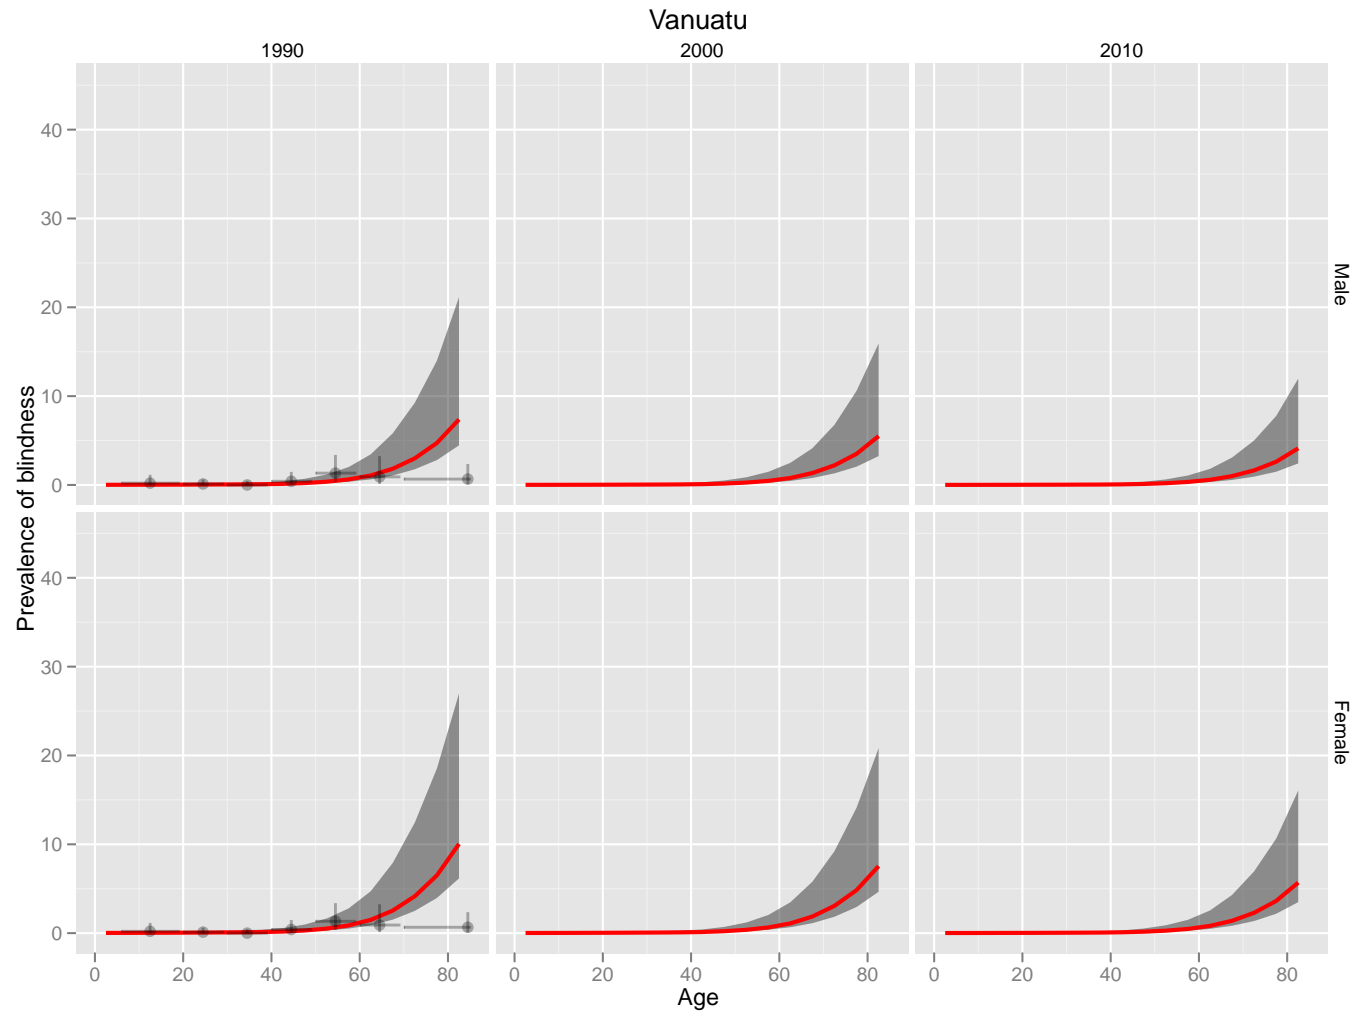

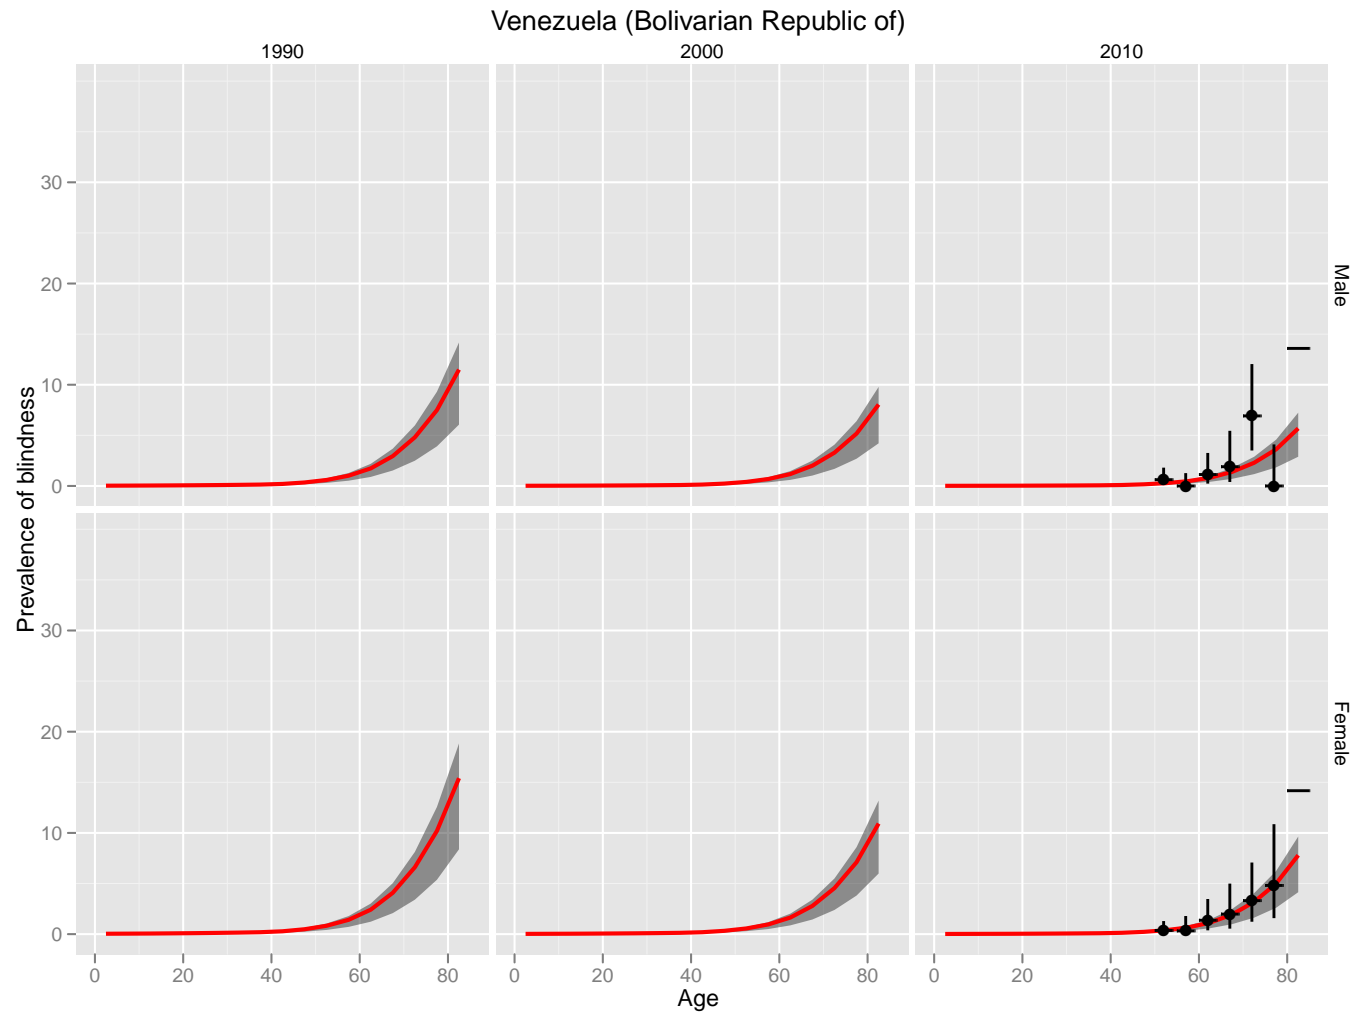

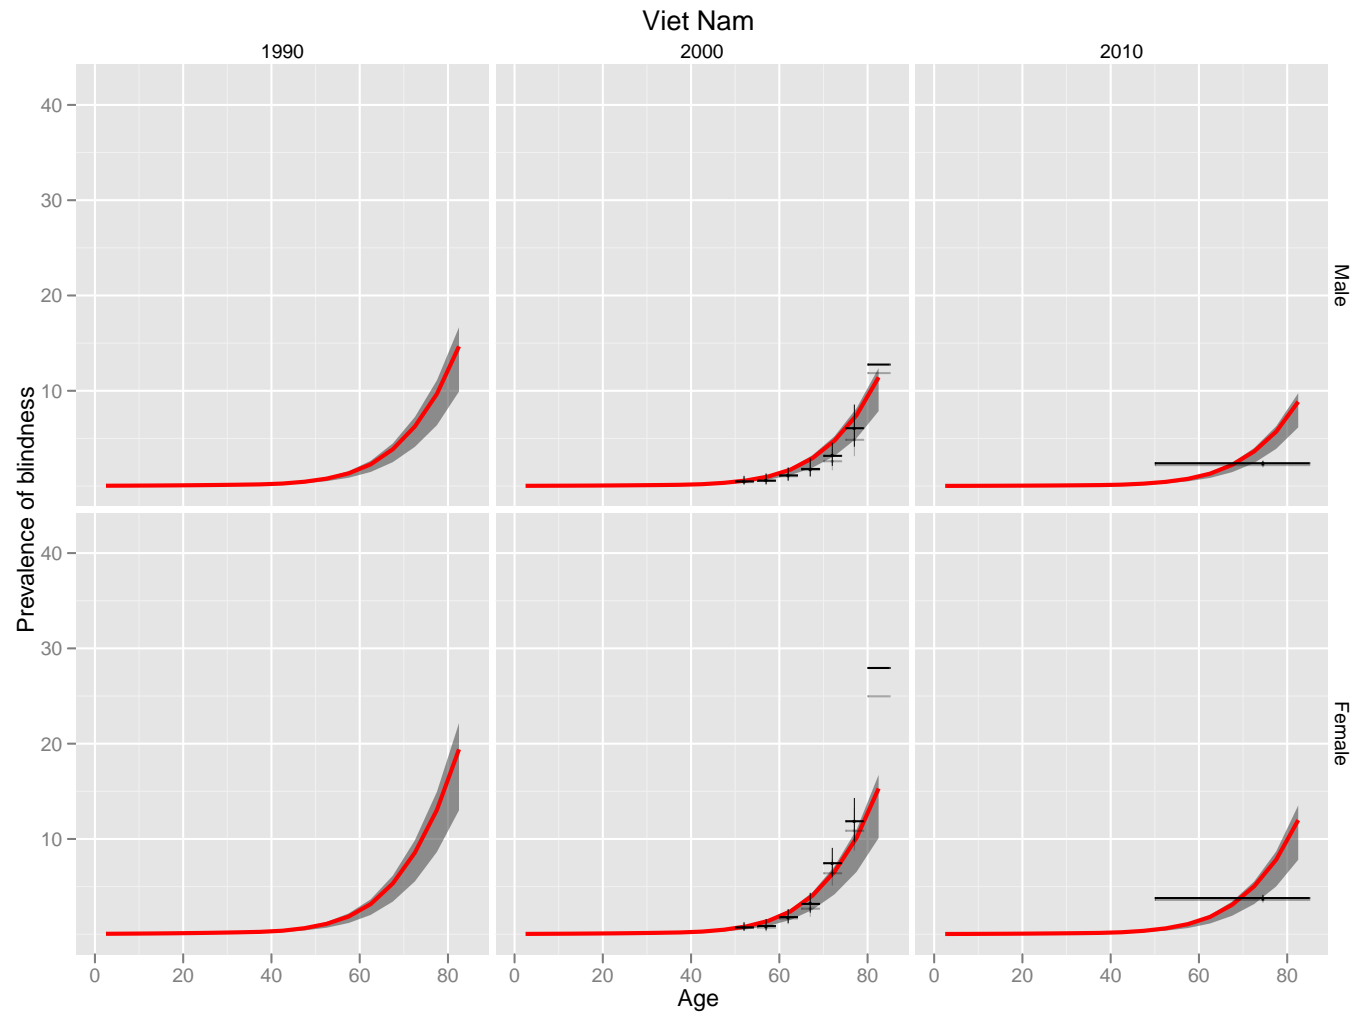

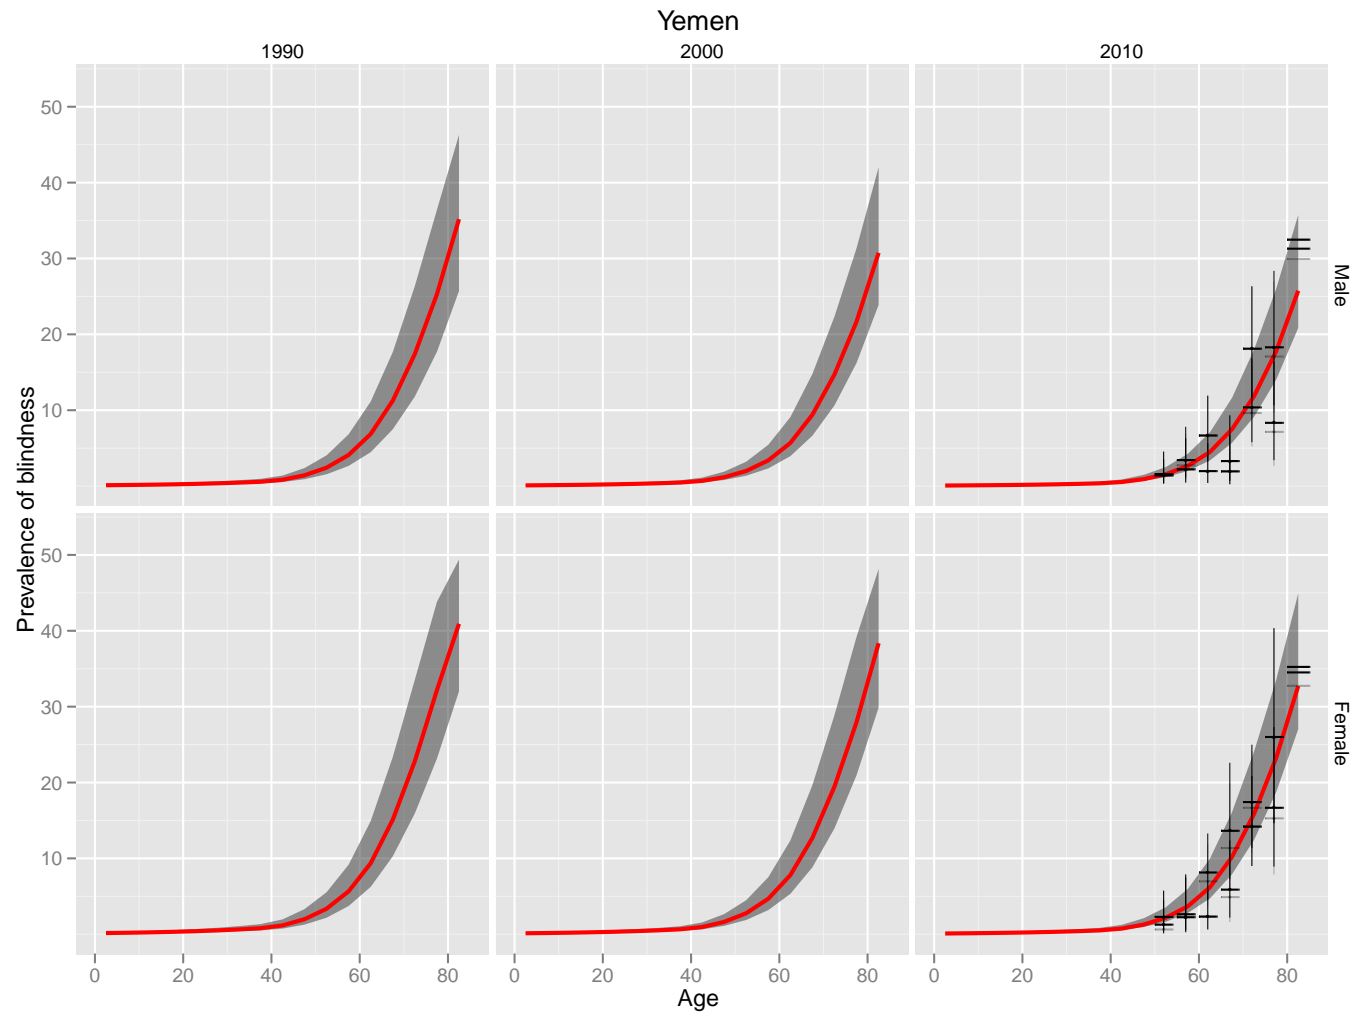

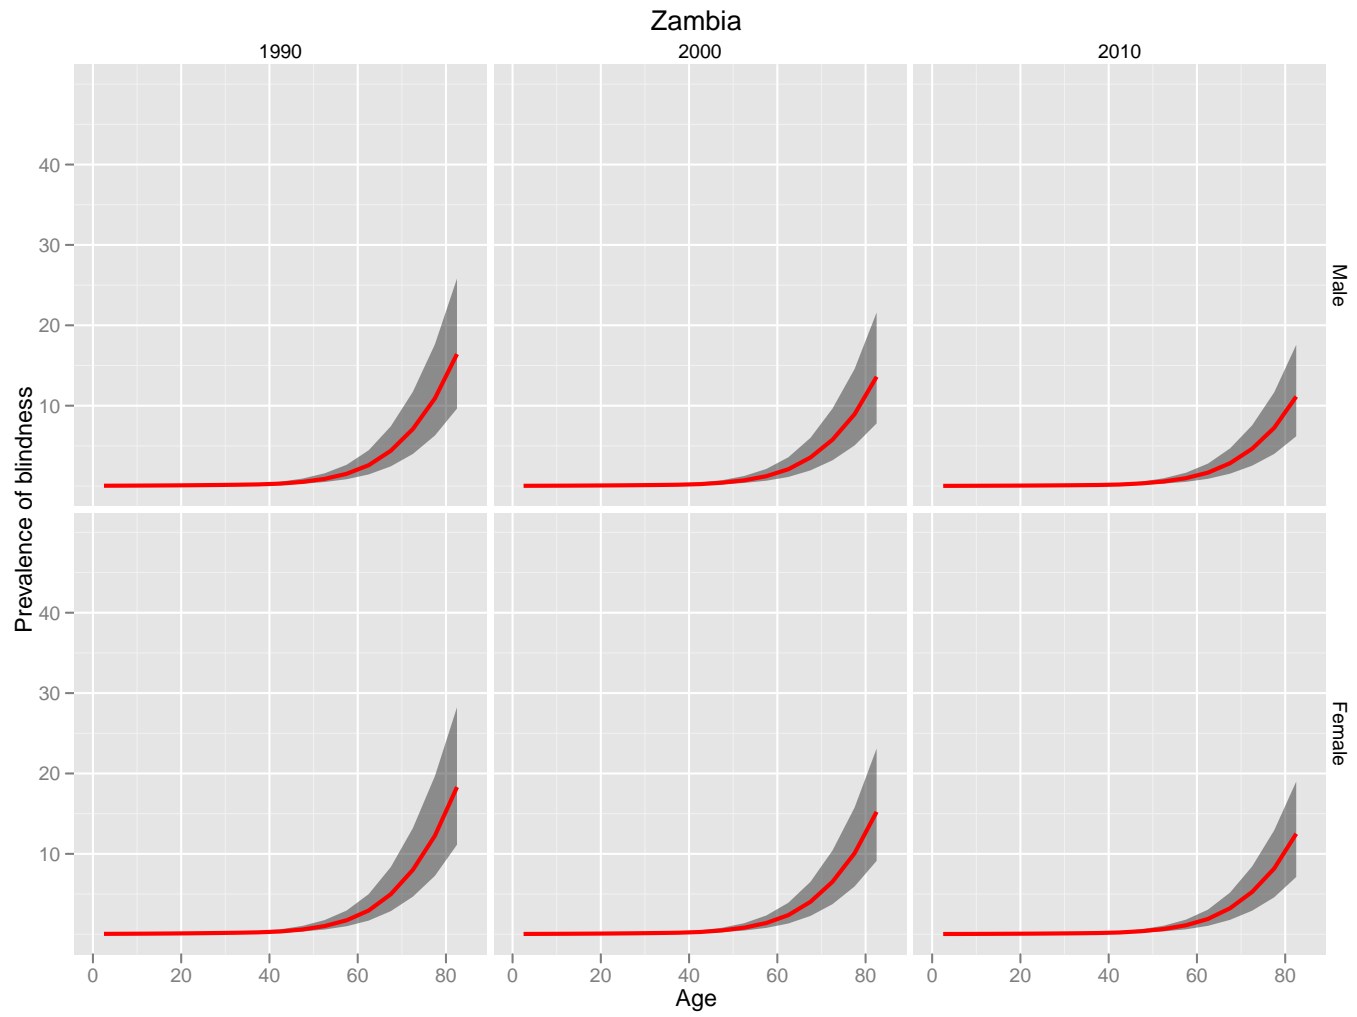



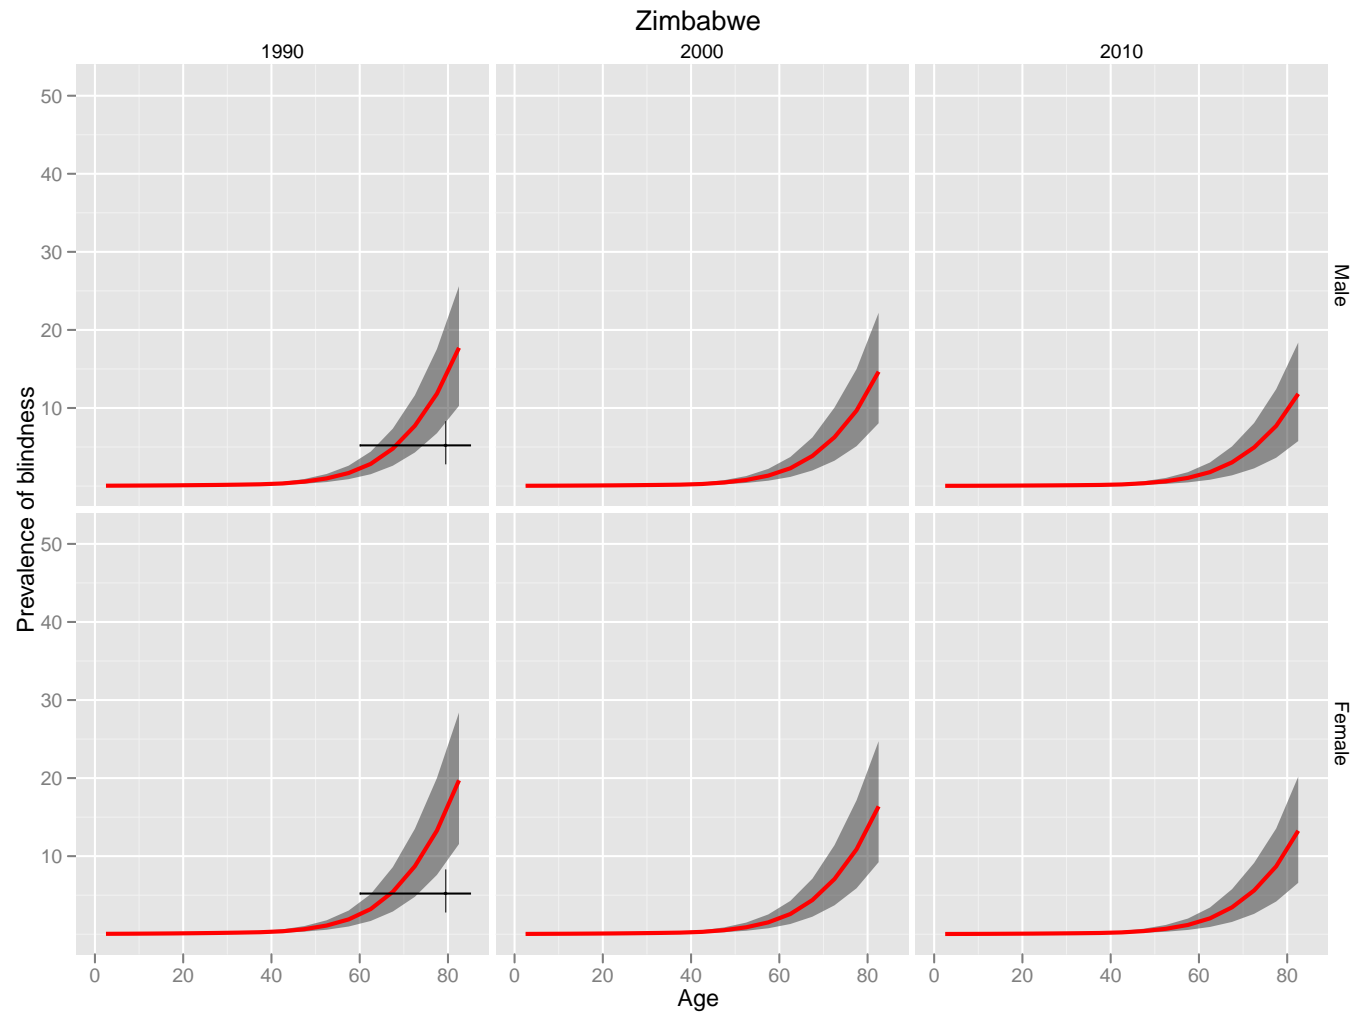

+ Presenting  
+ Best corrected

— National  
— Sub-national

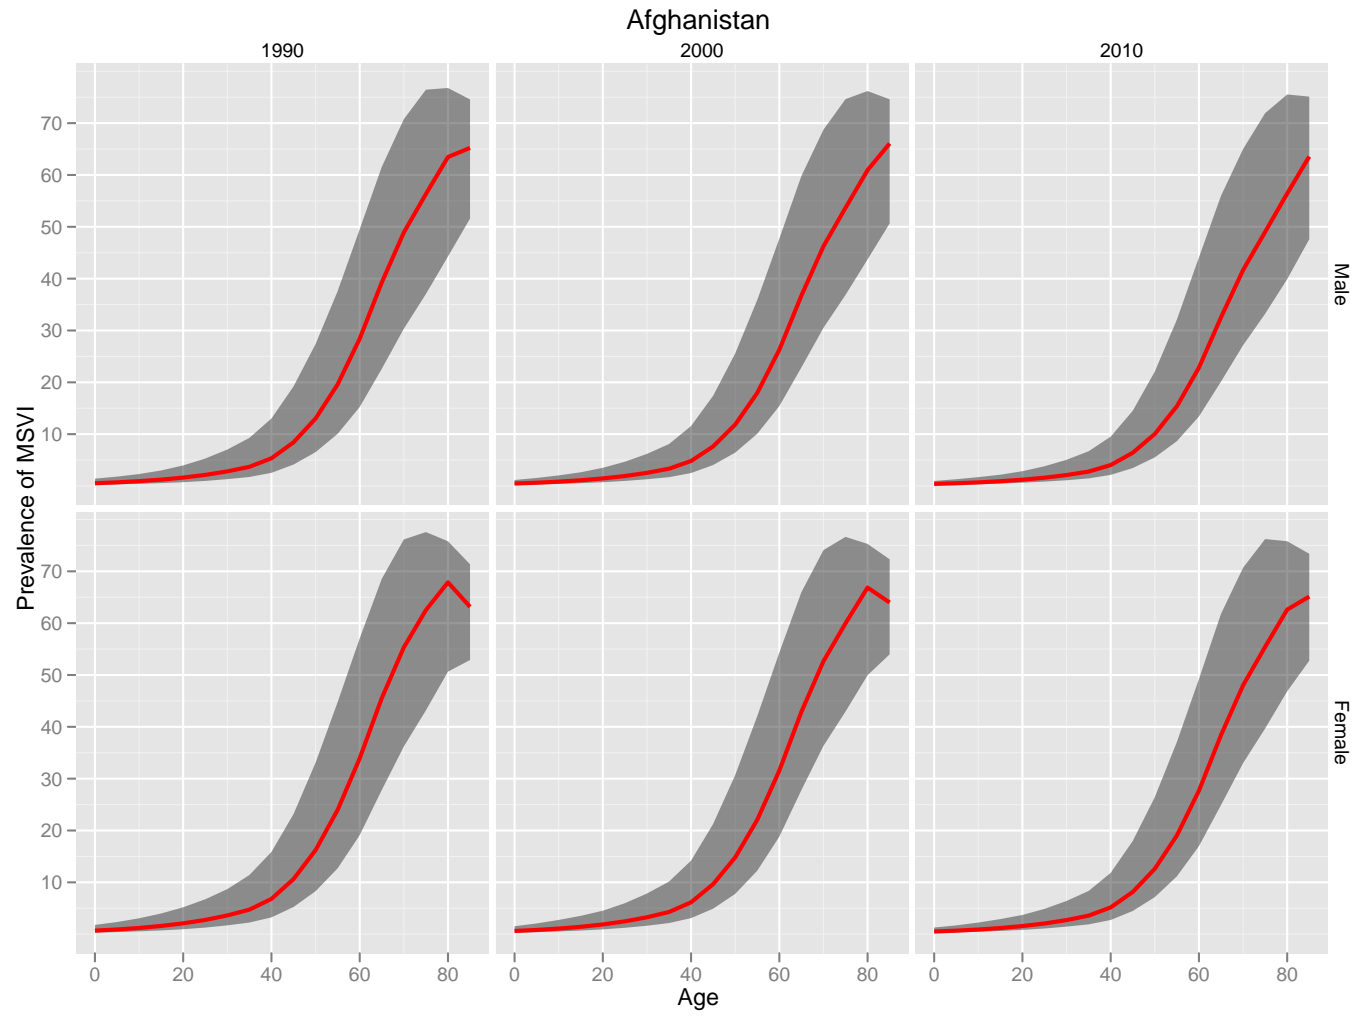

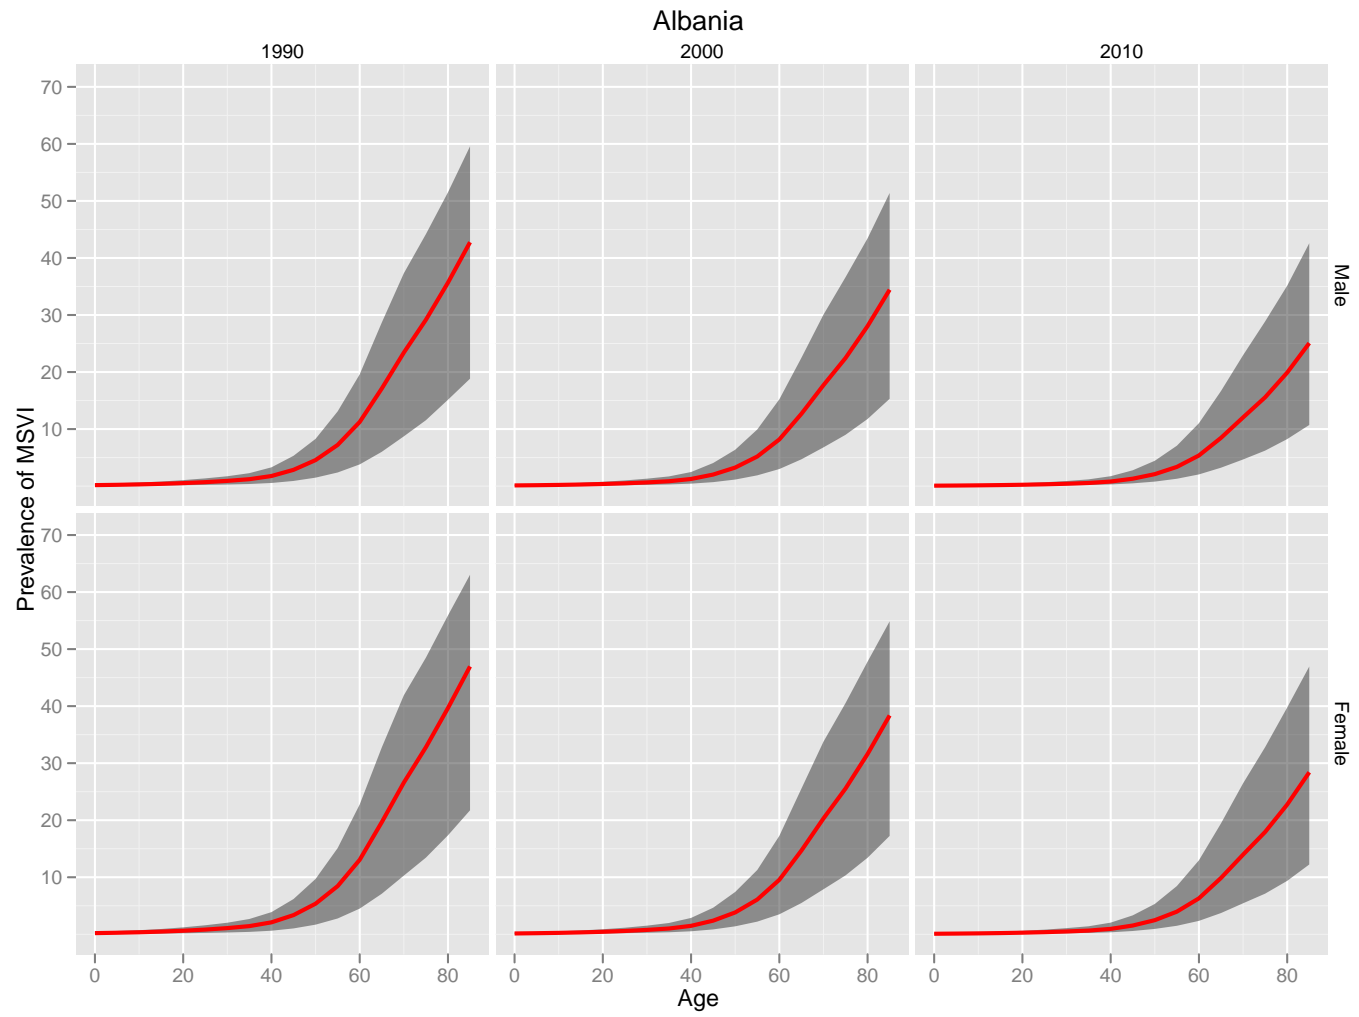

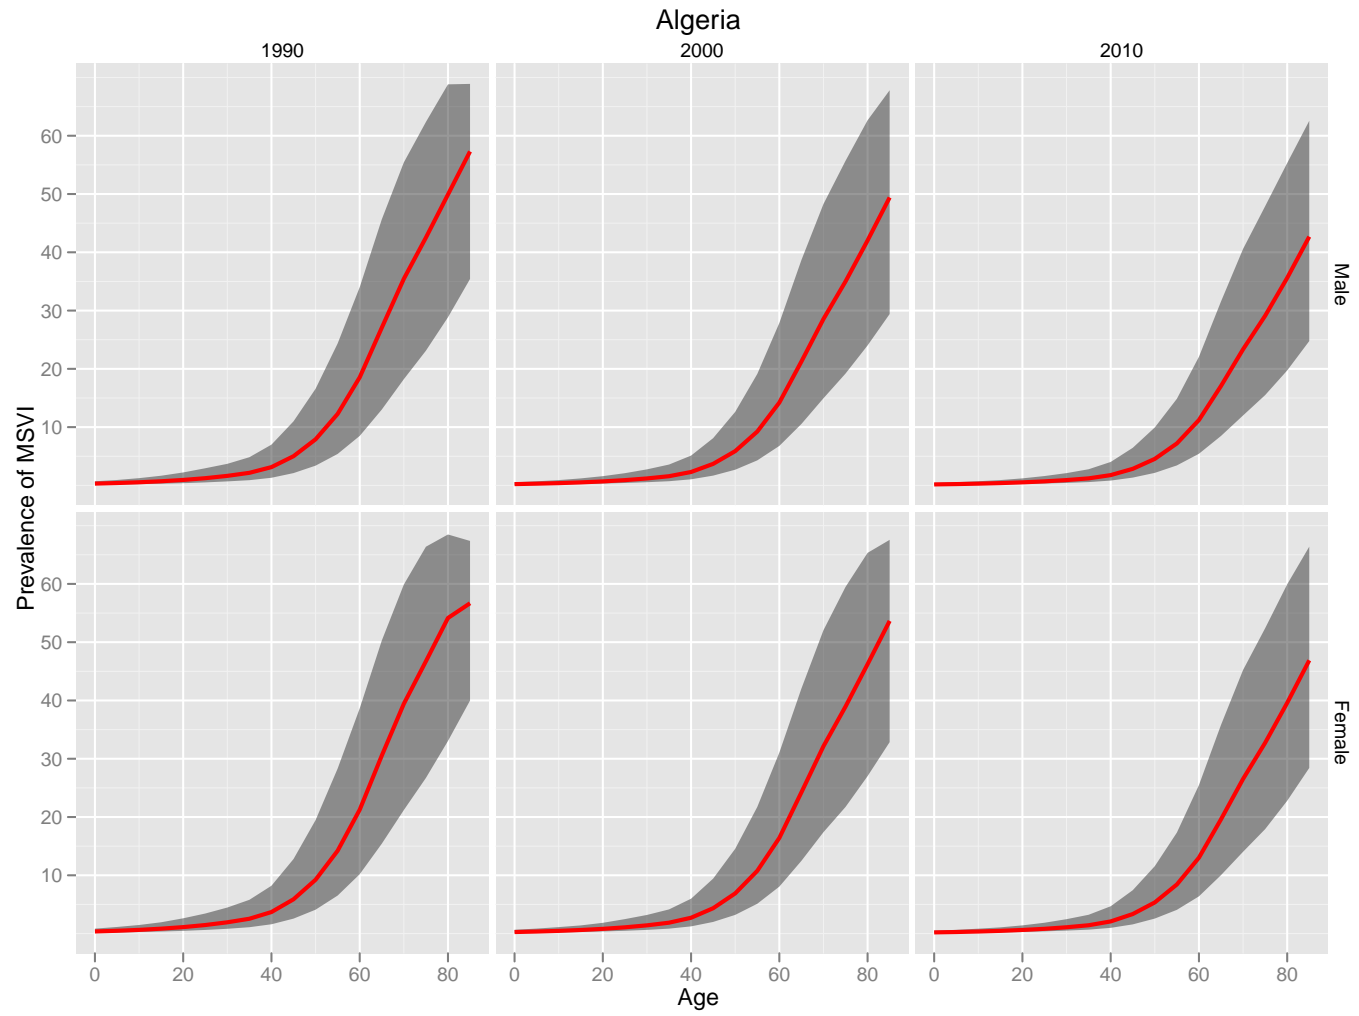

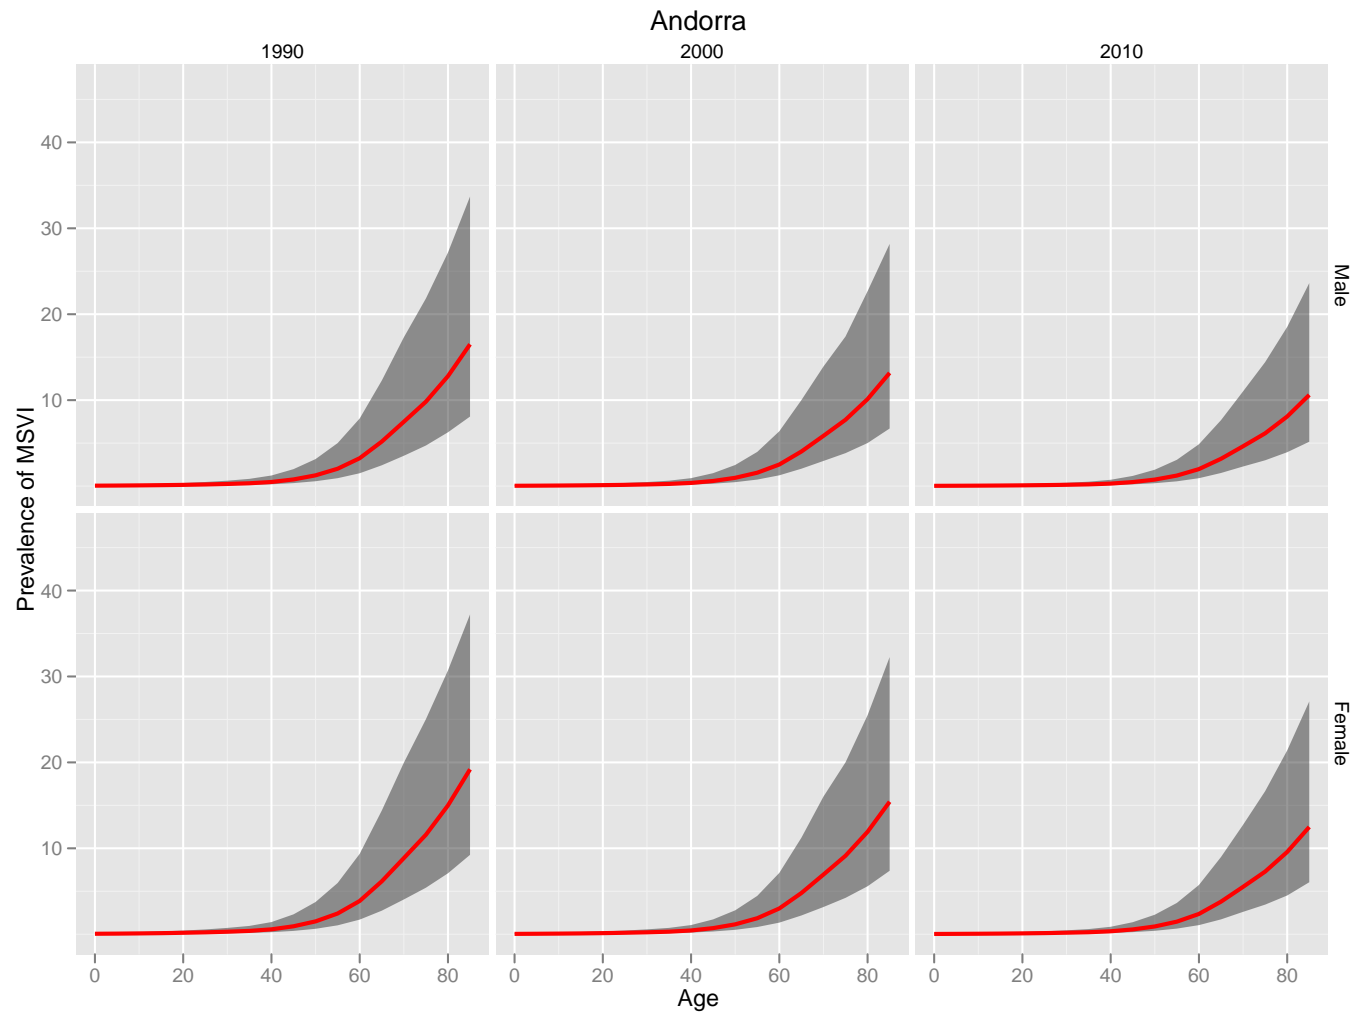

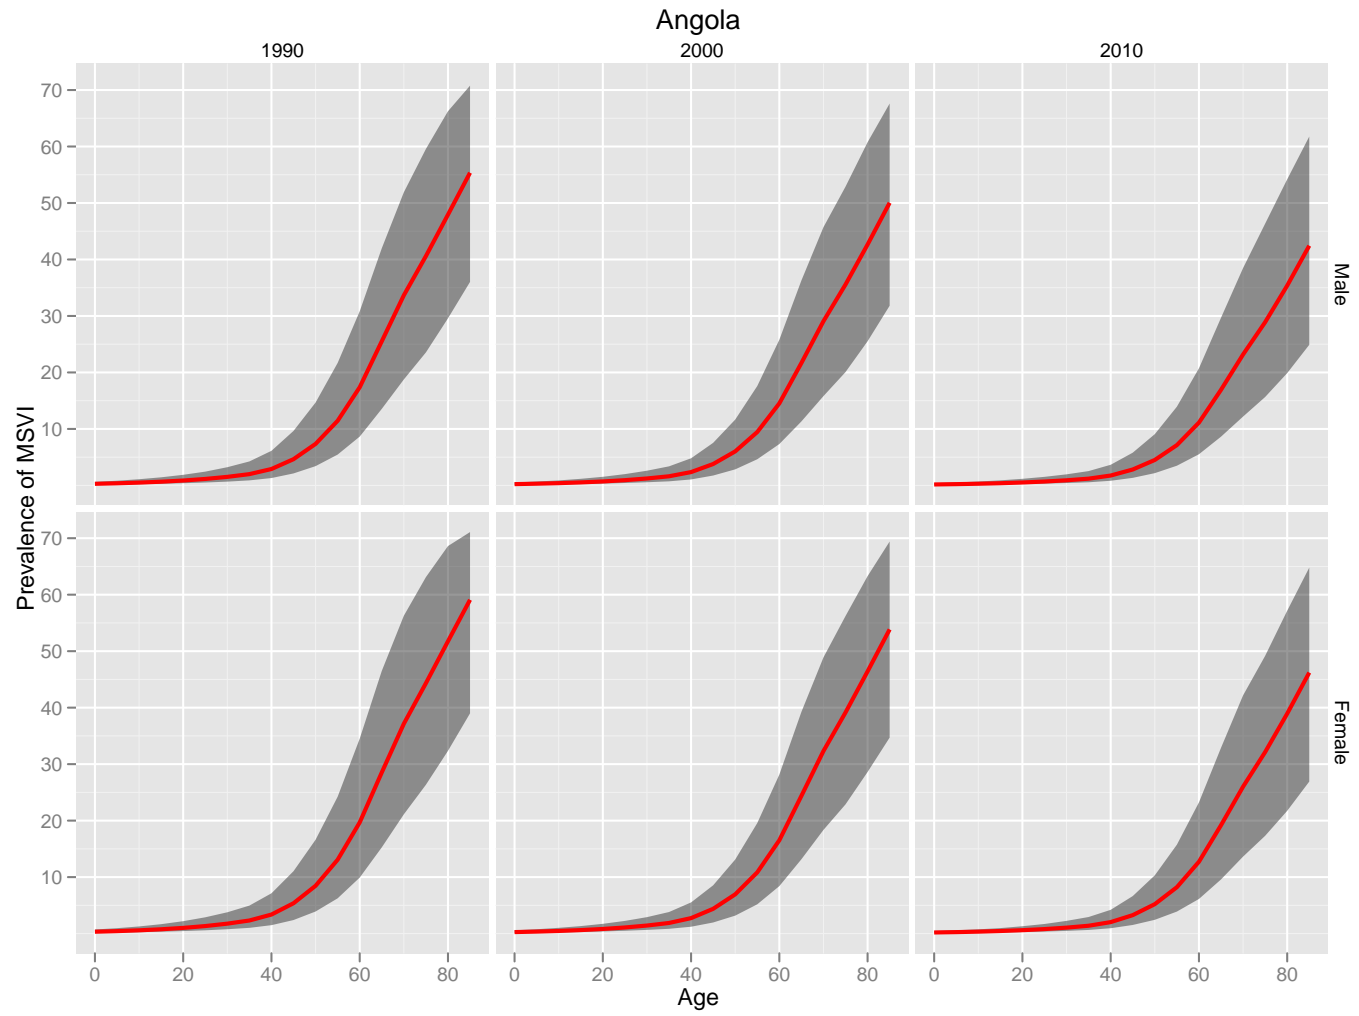

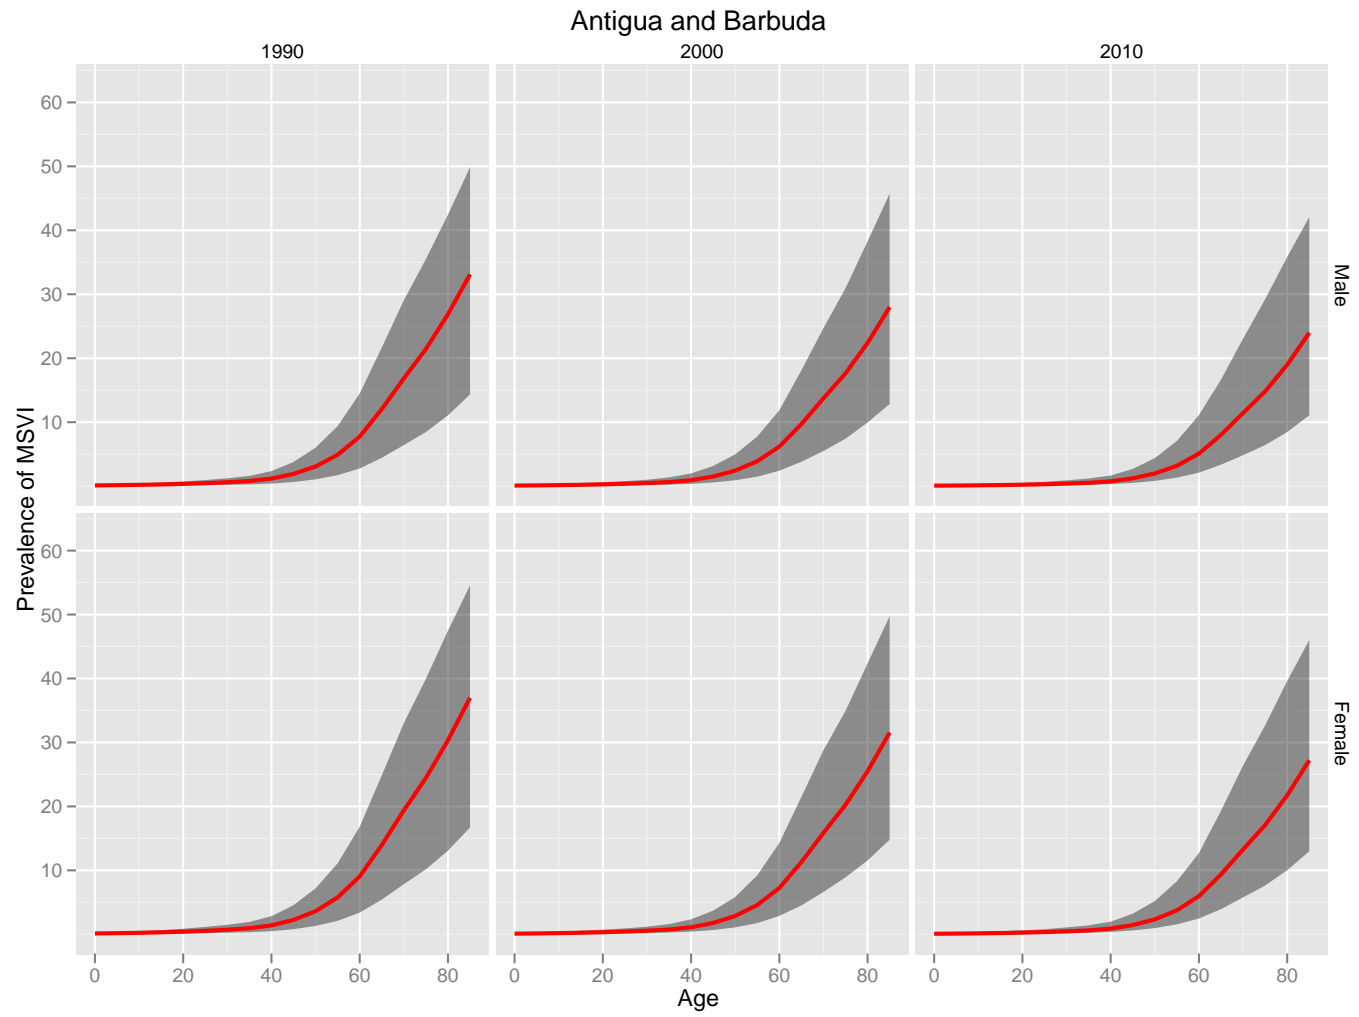



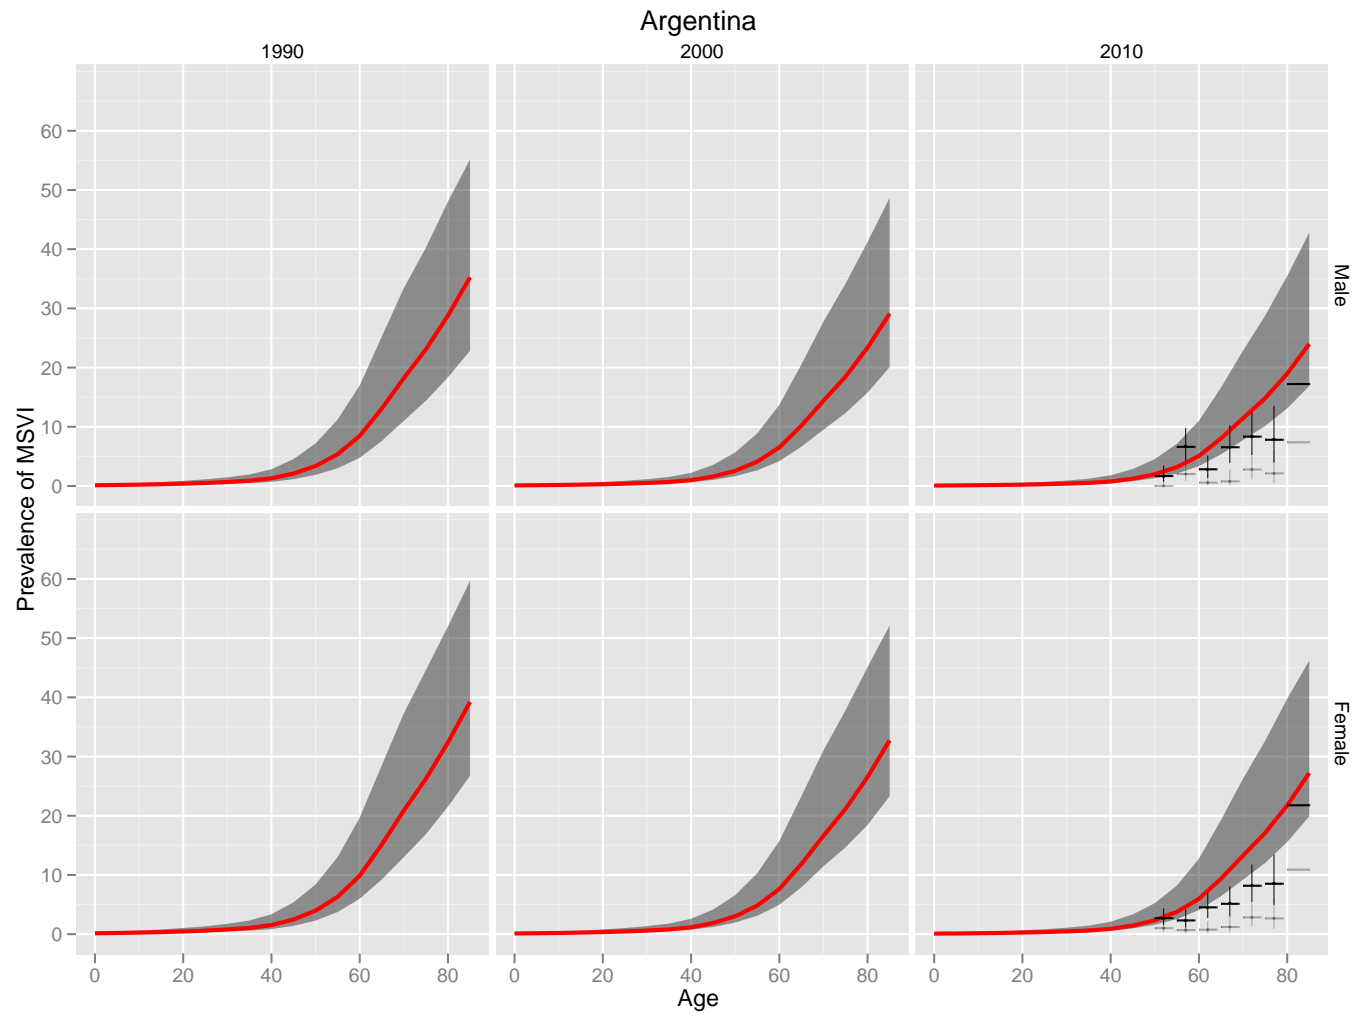

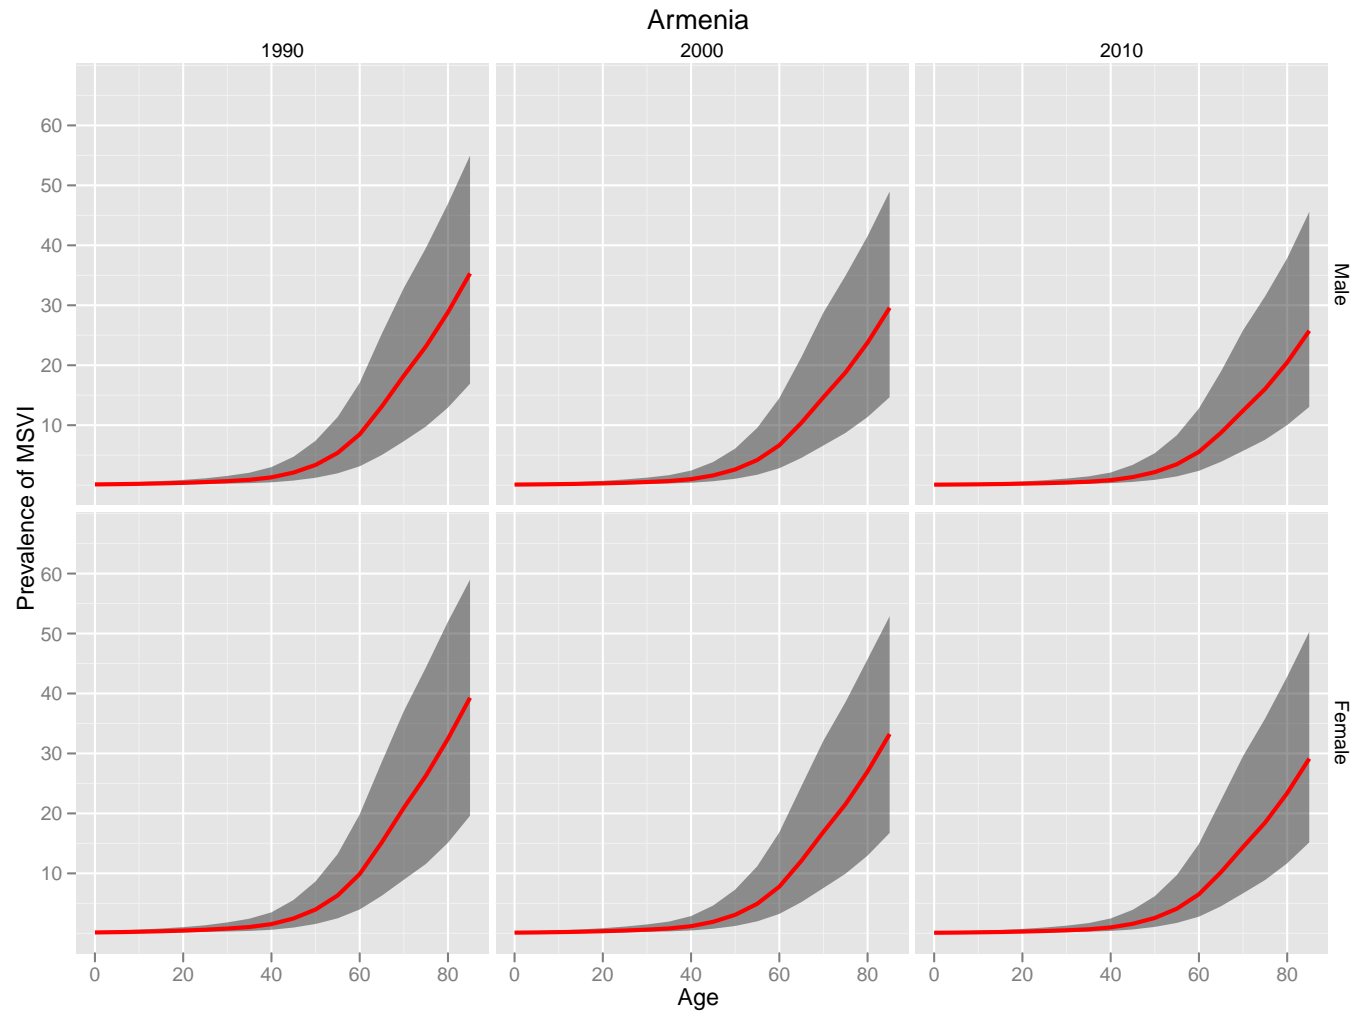

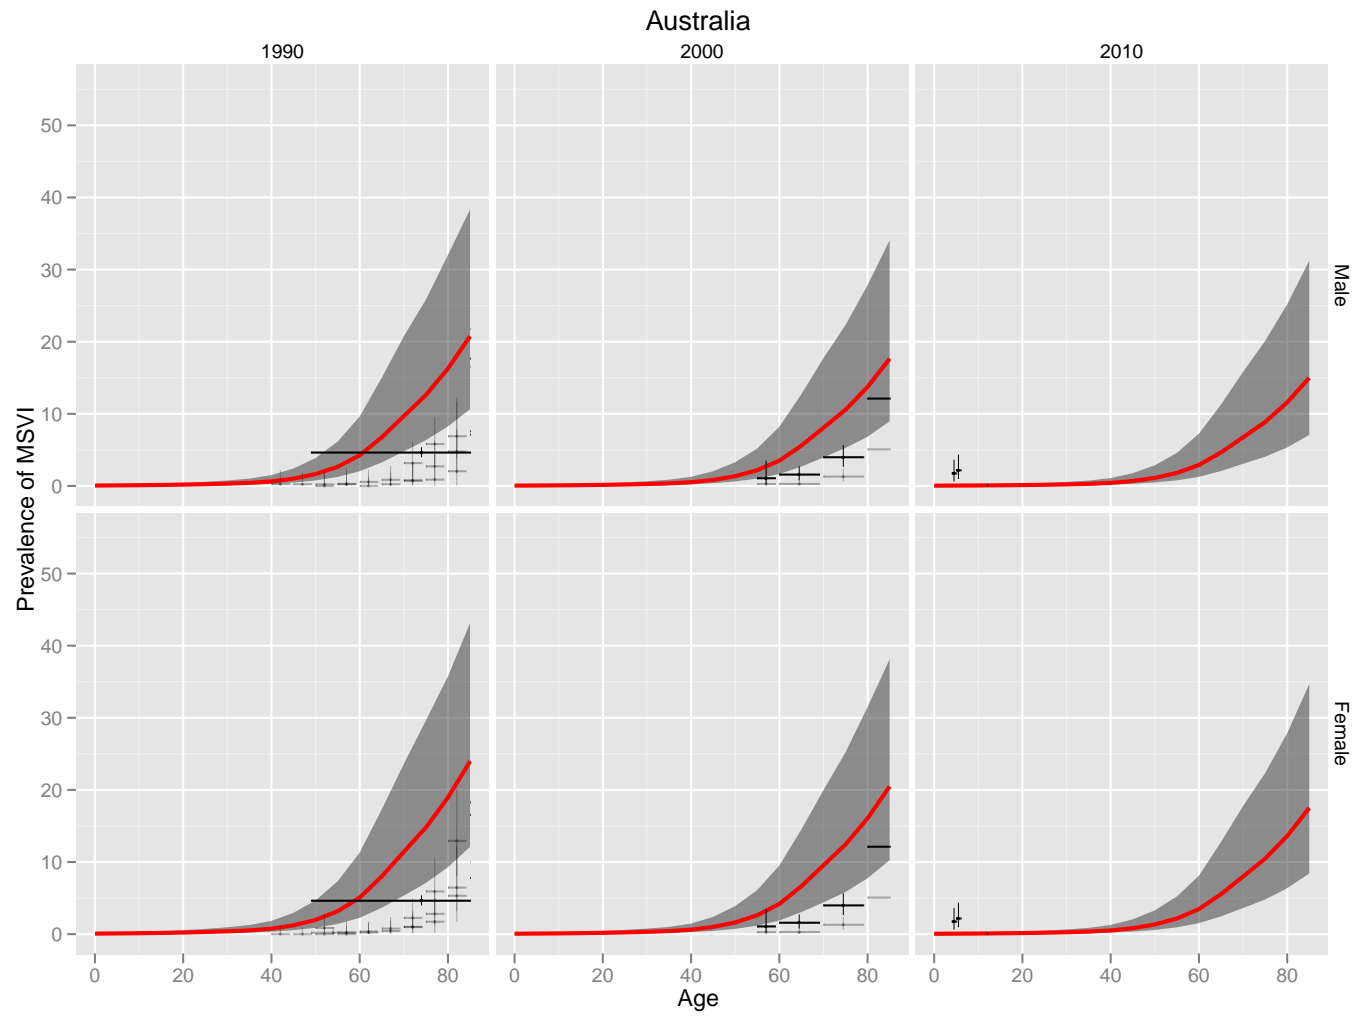

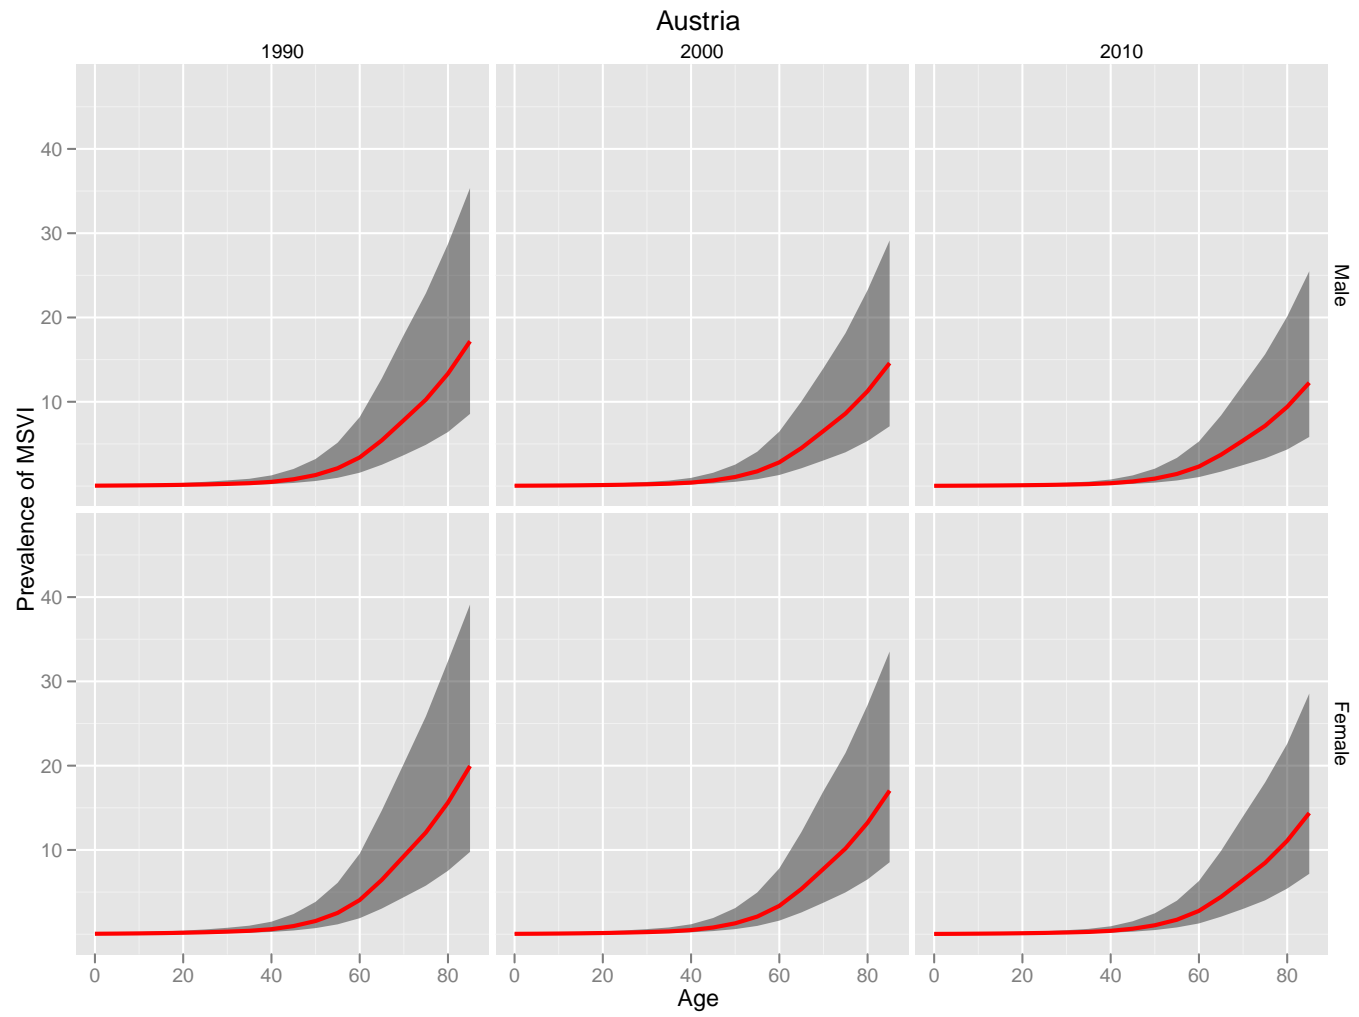

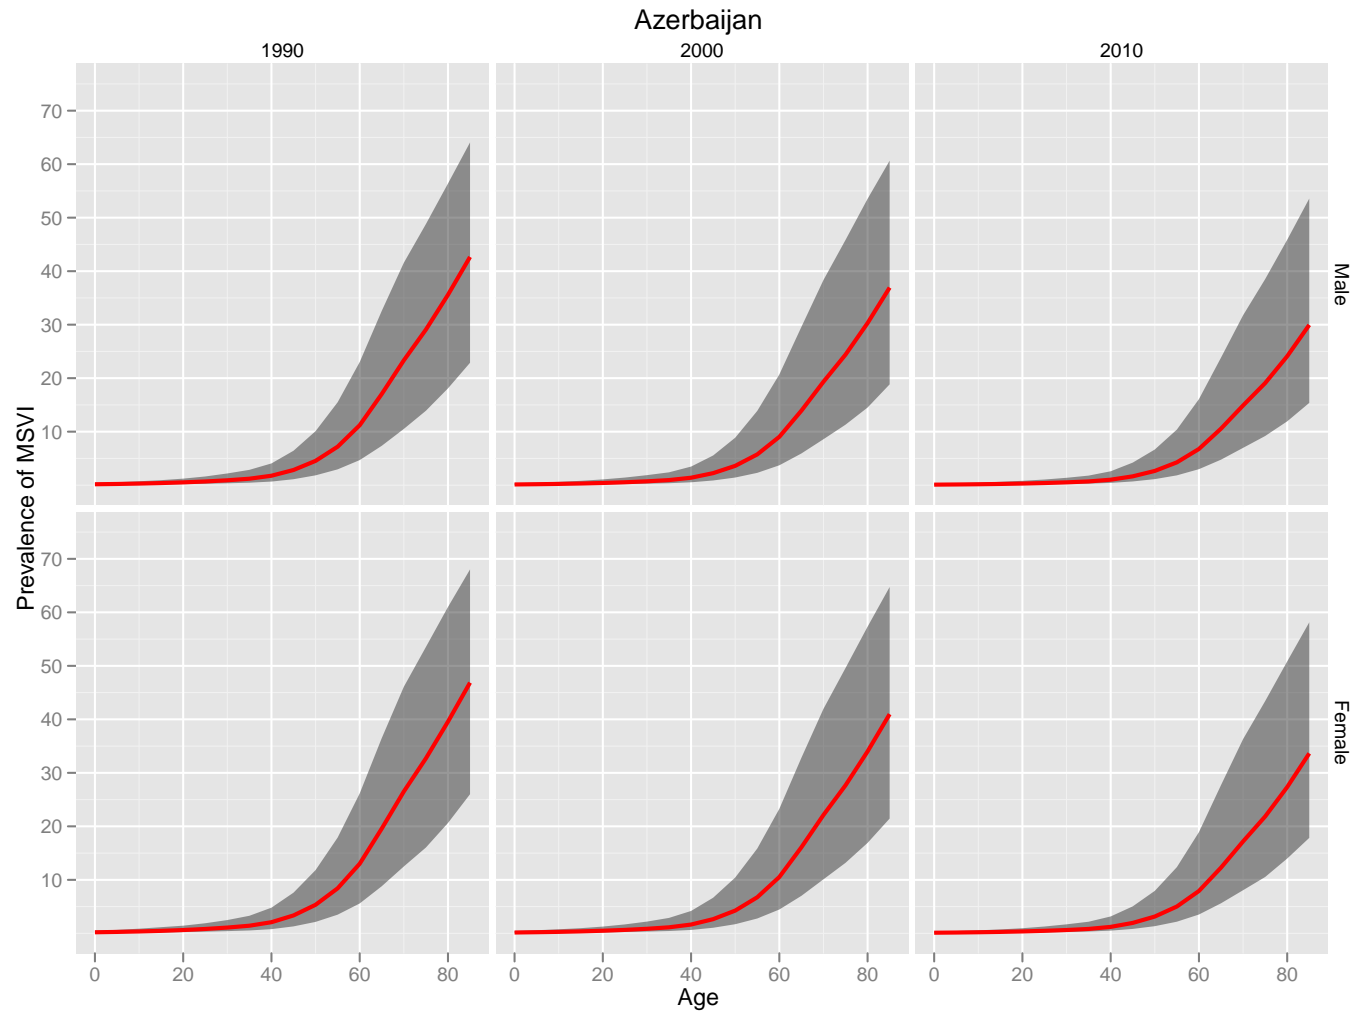

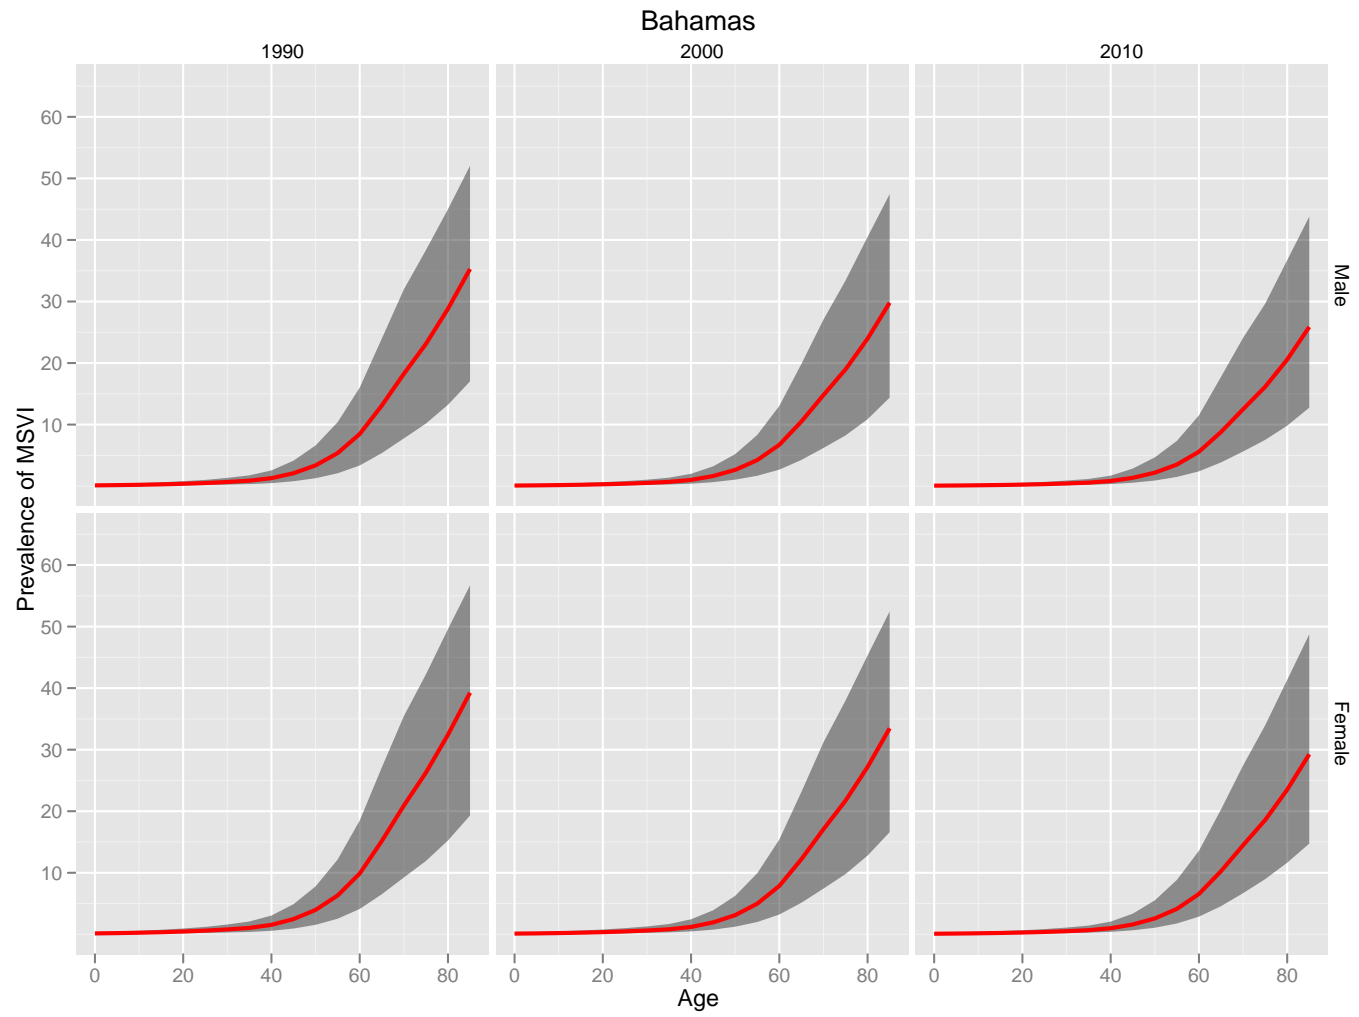

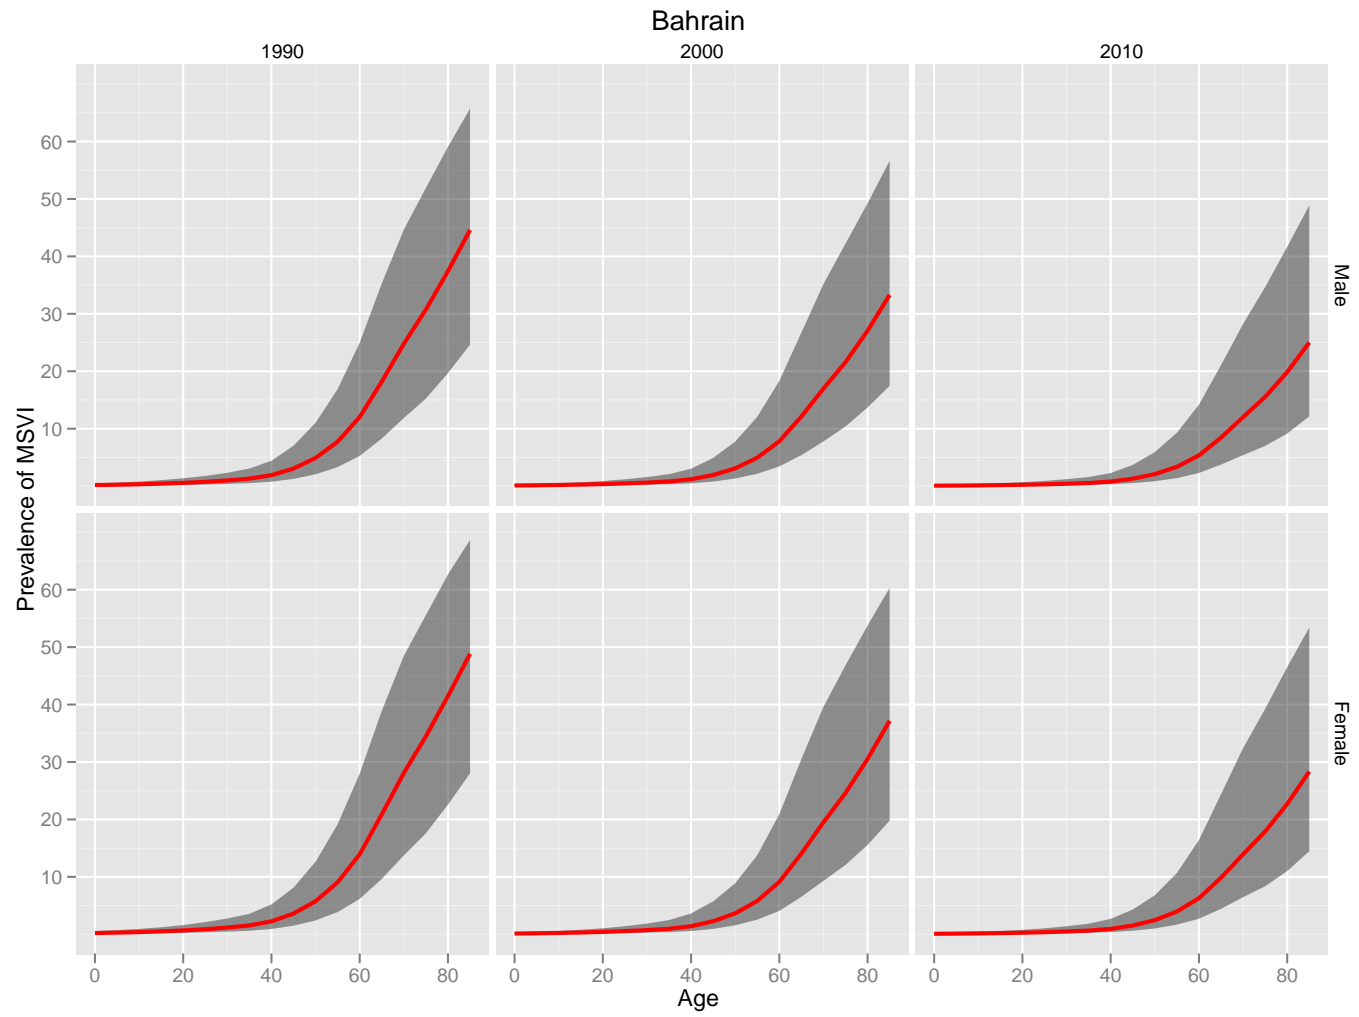

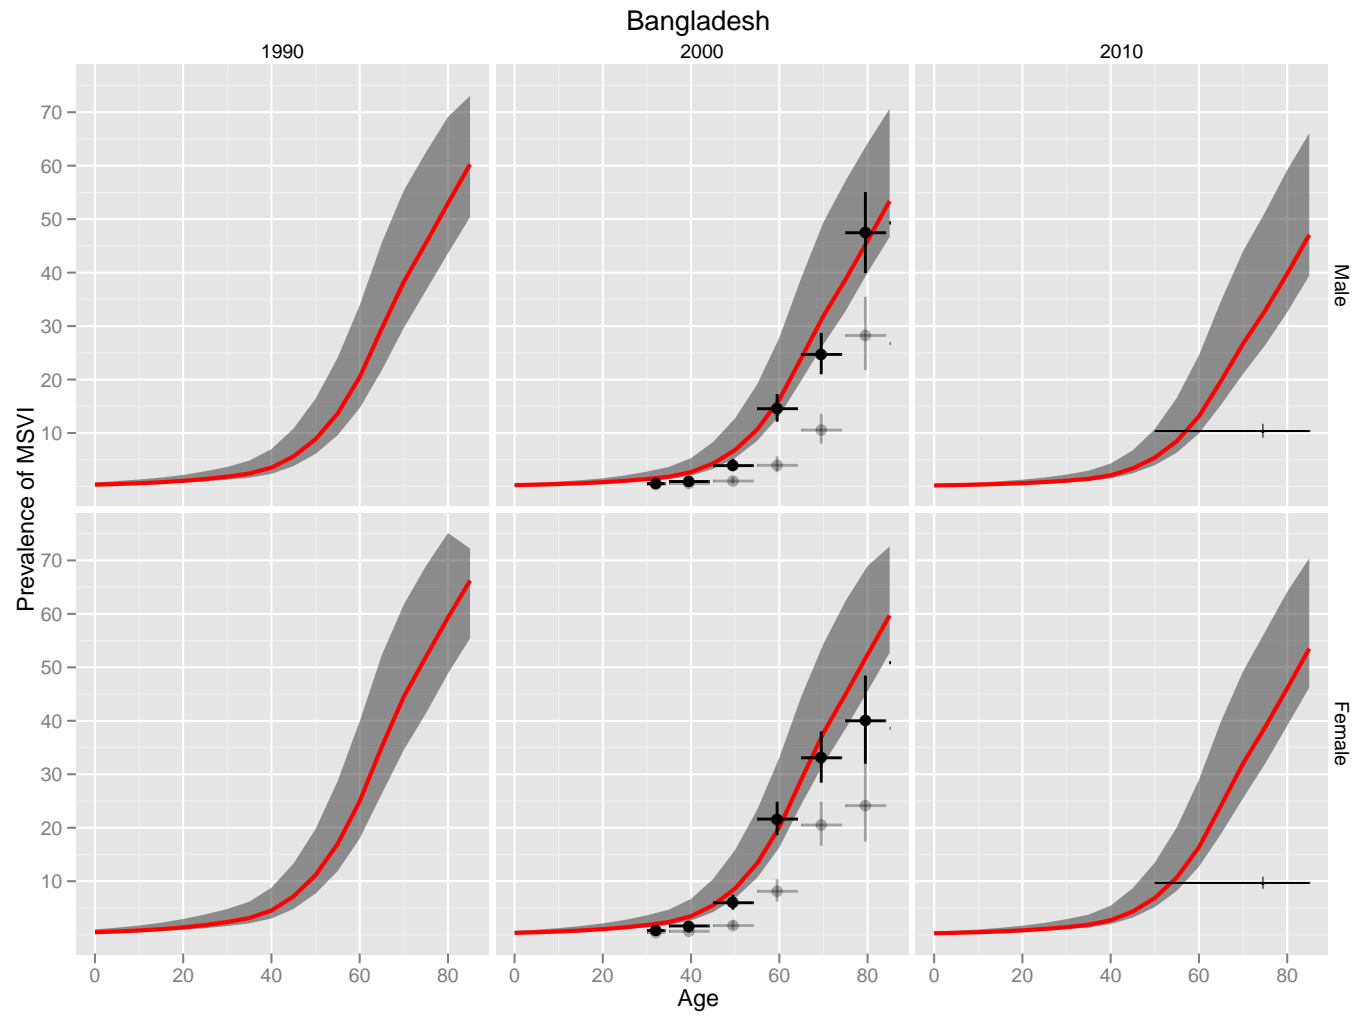



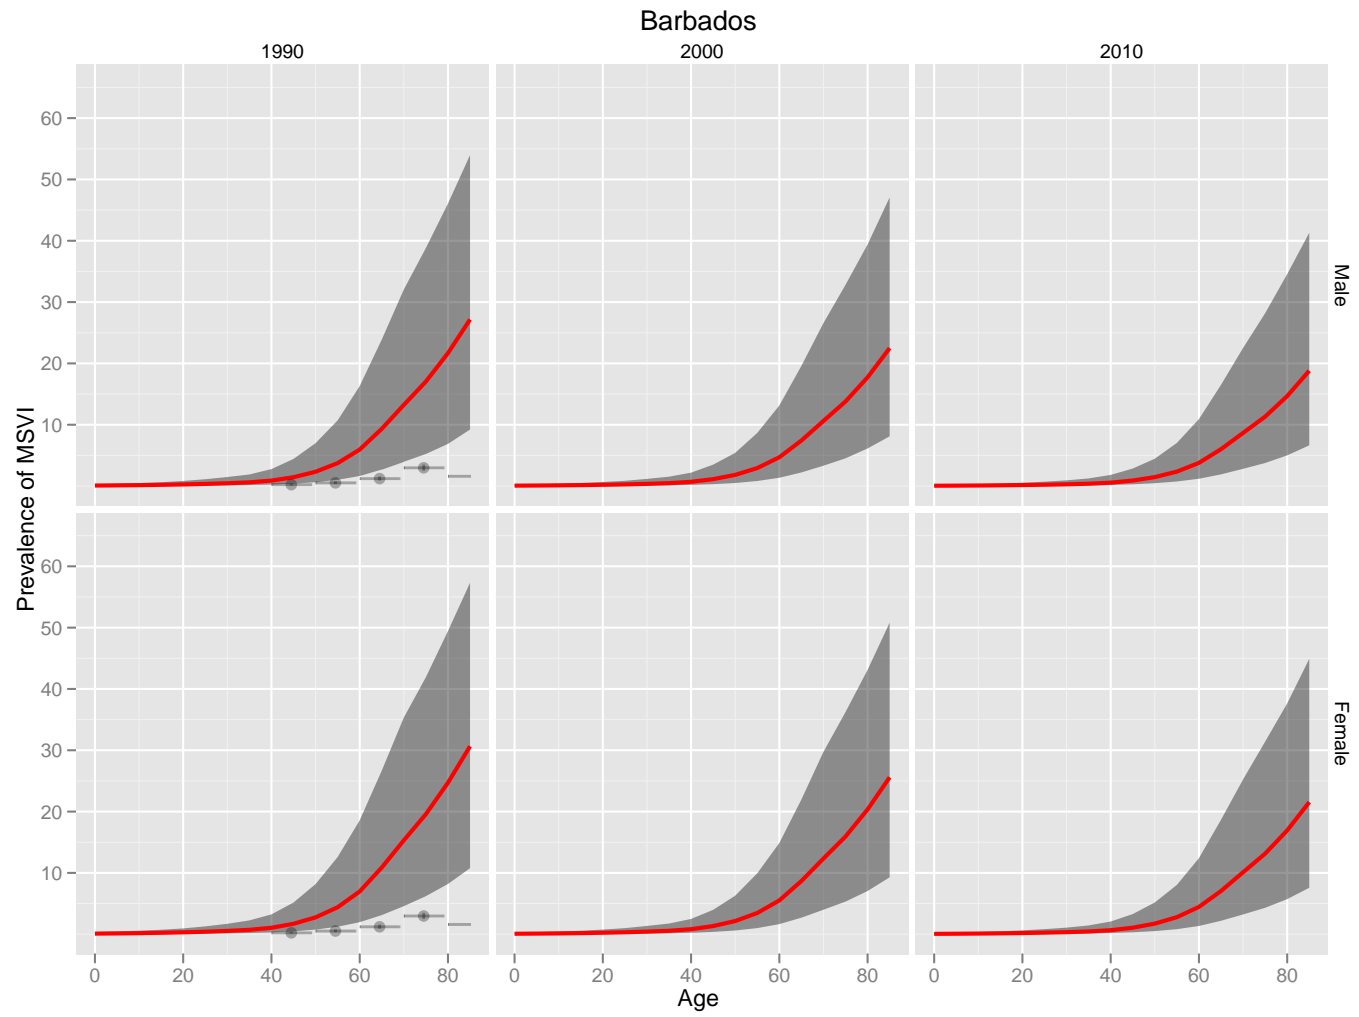

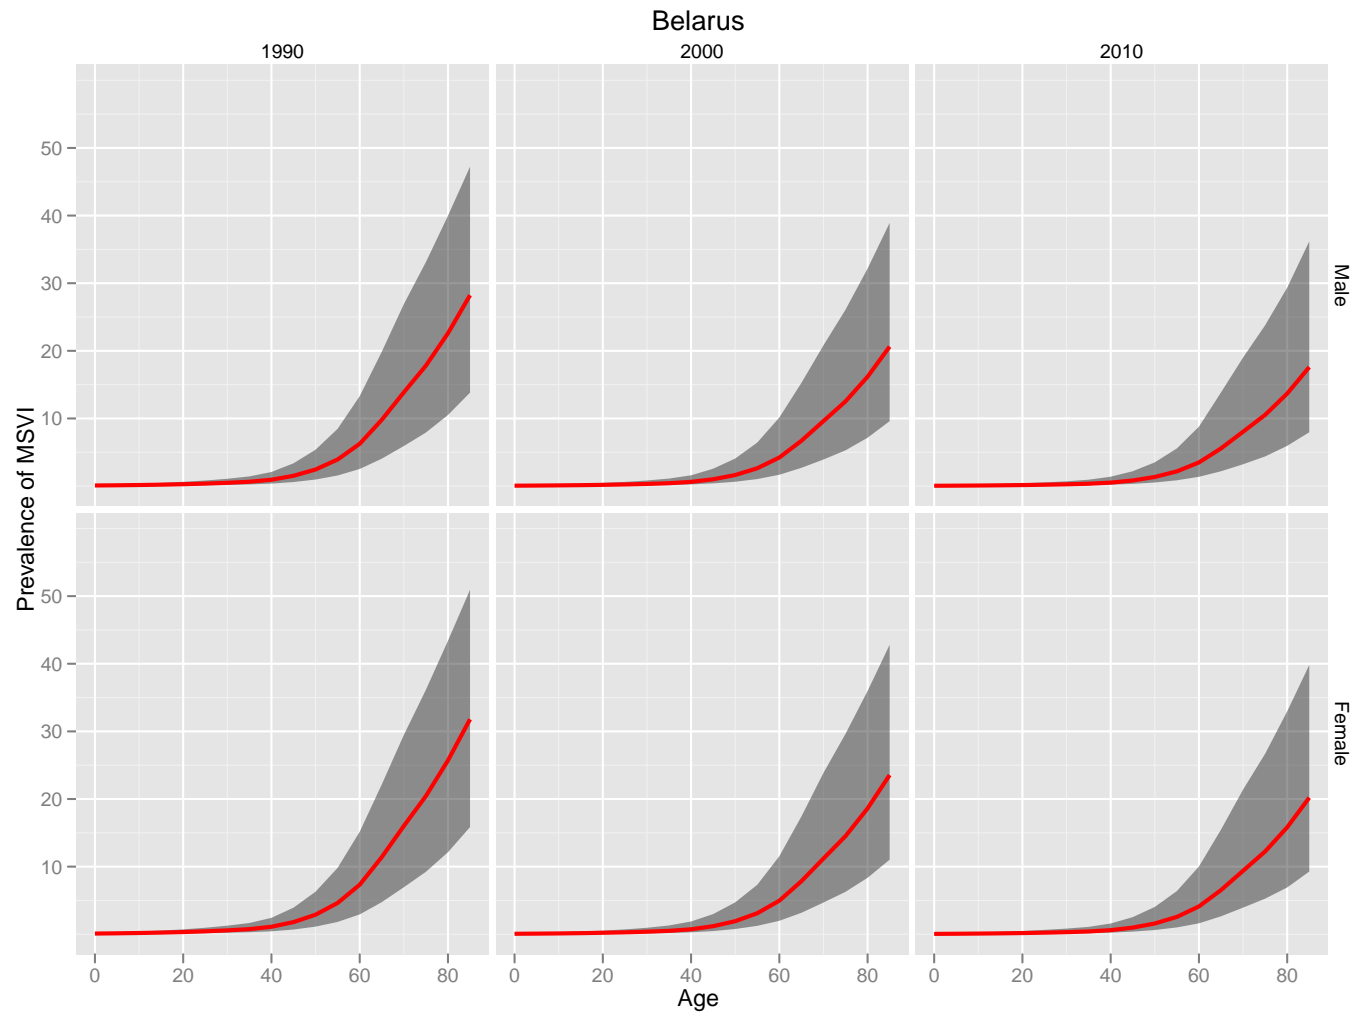

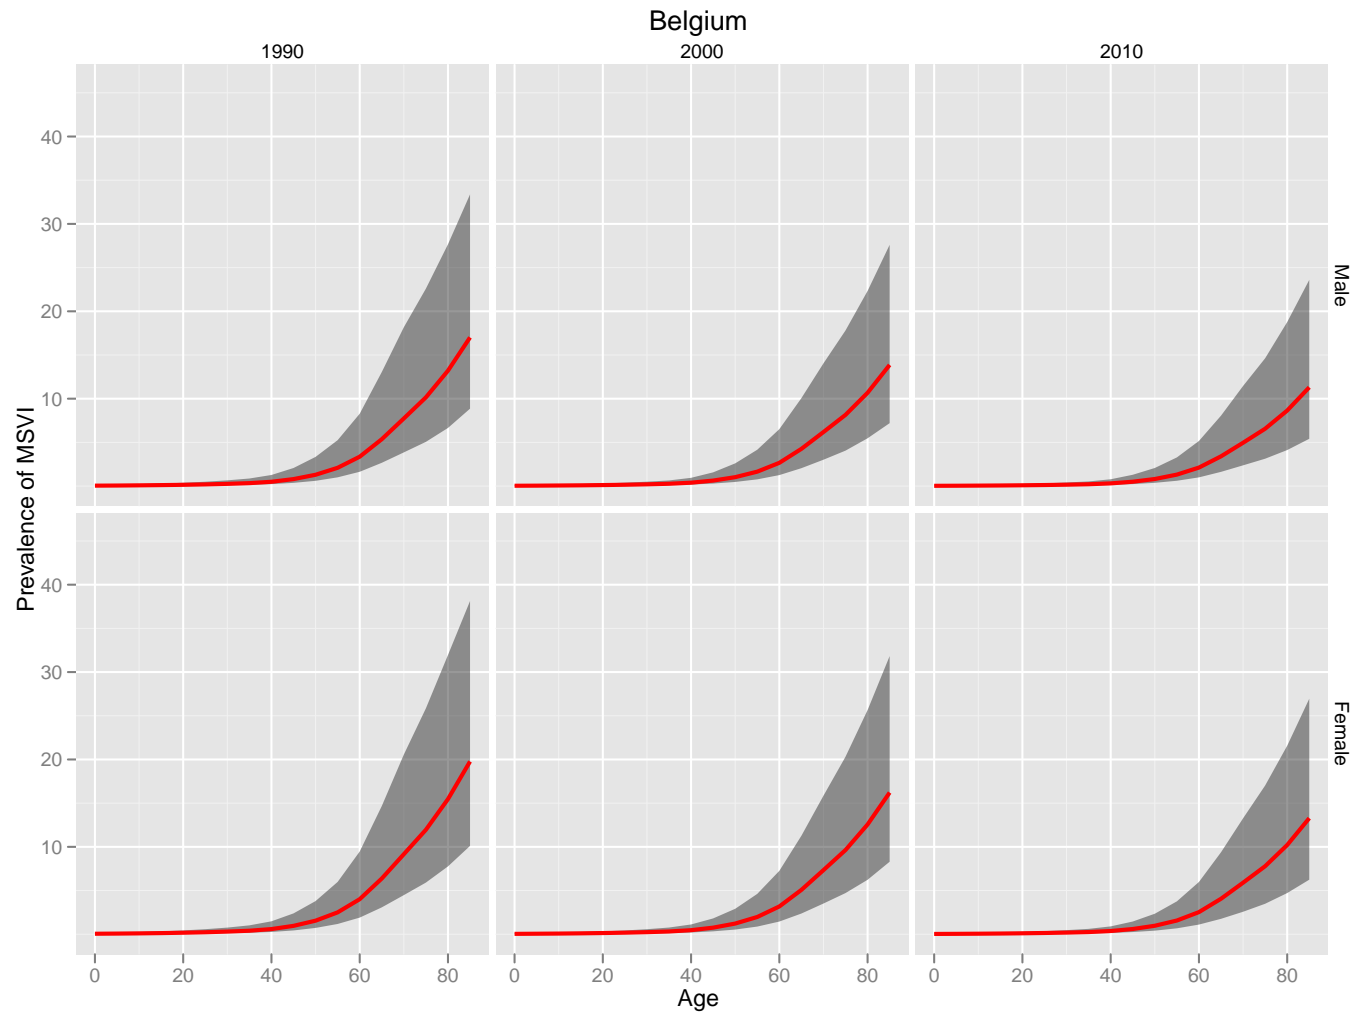

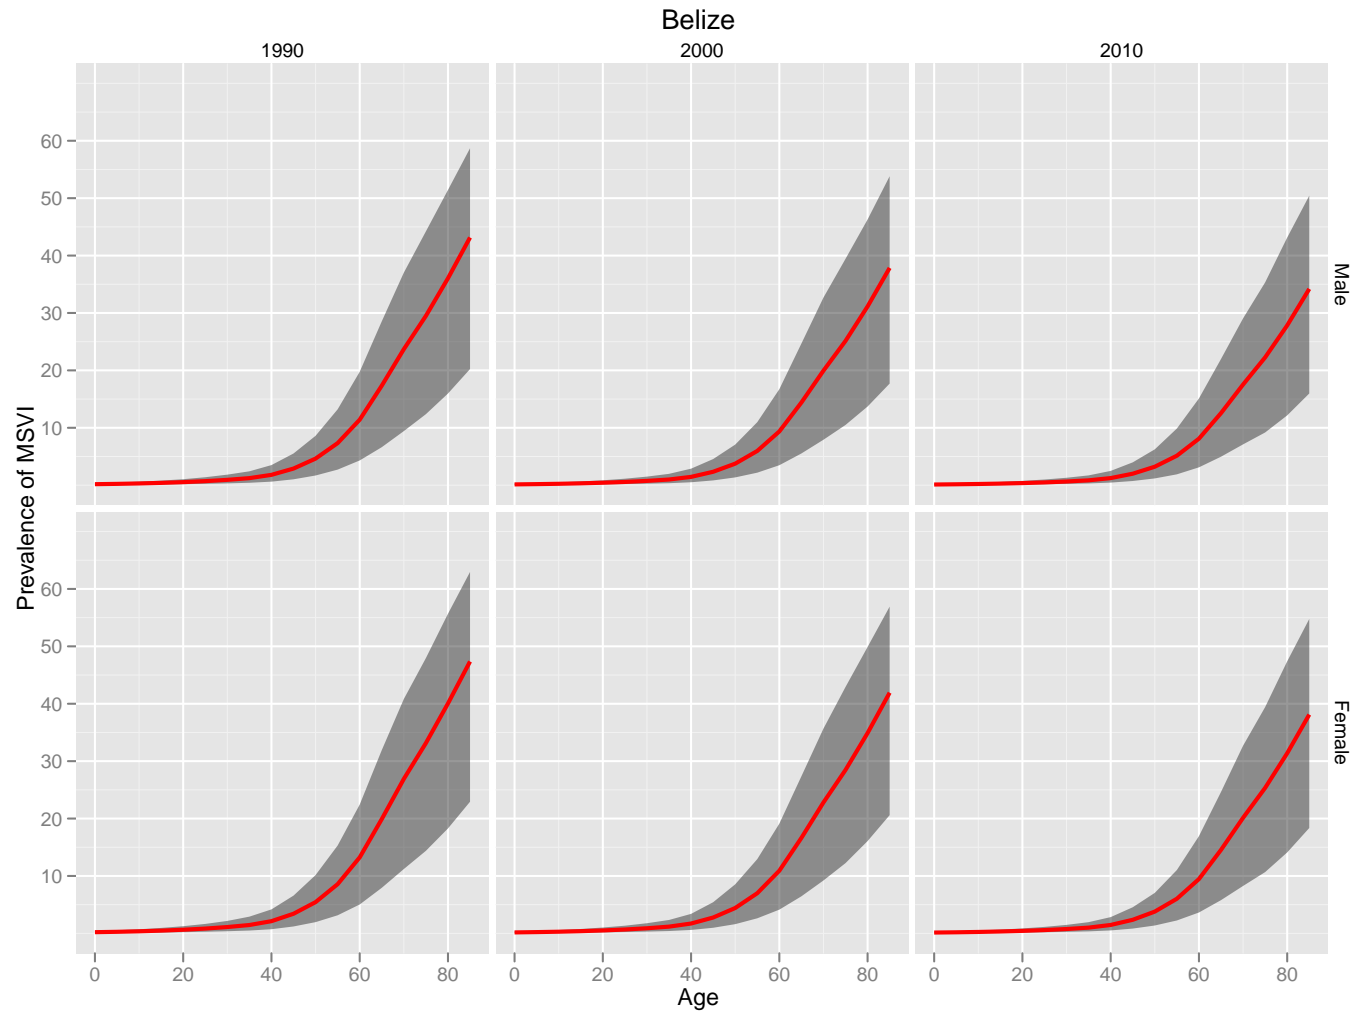

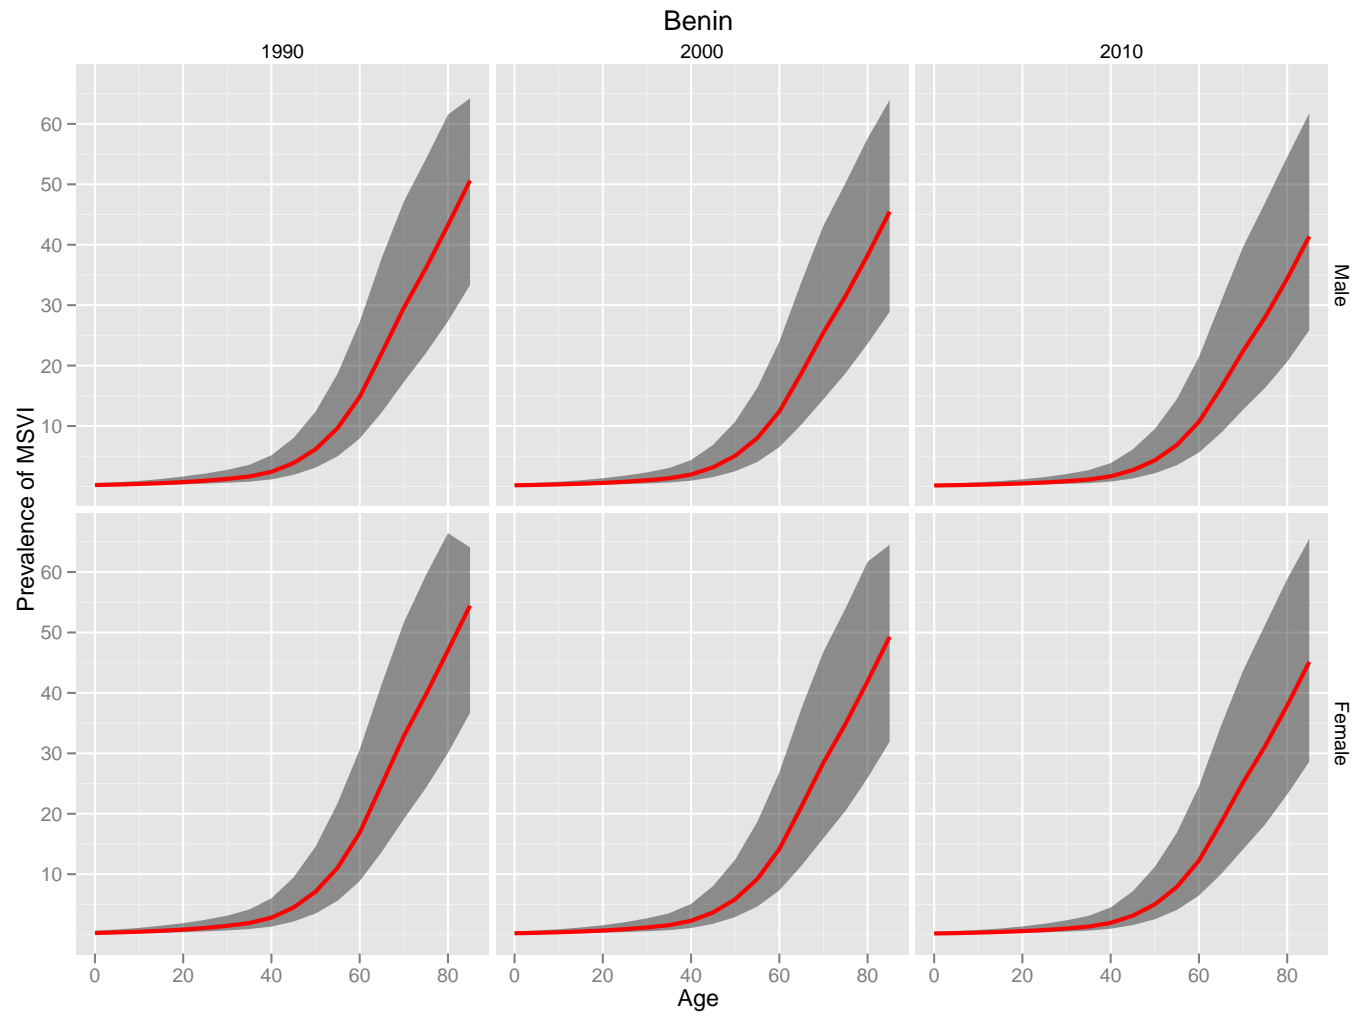

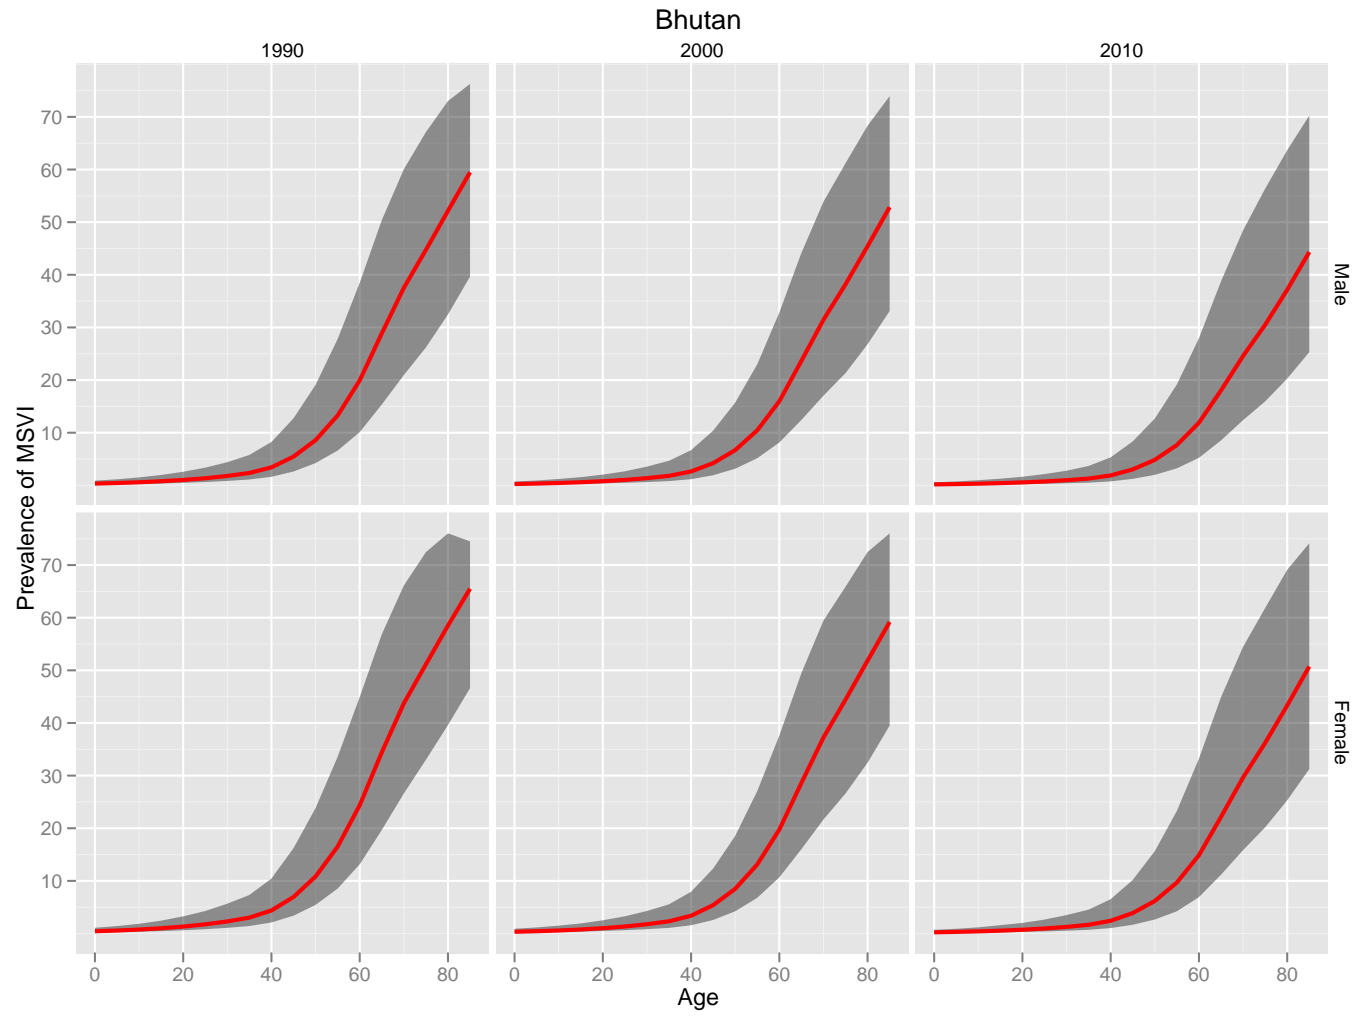

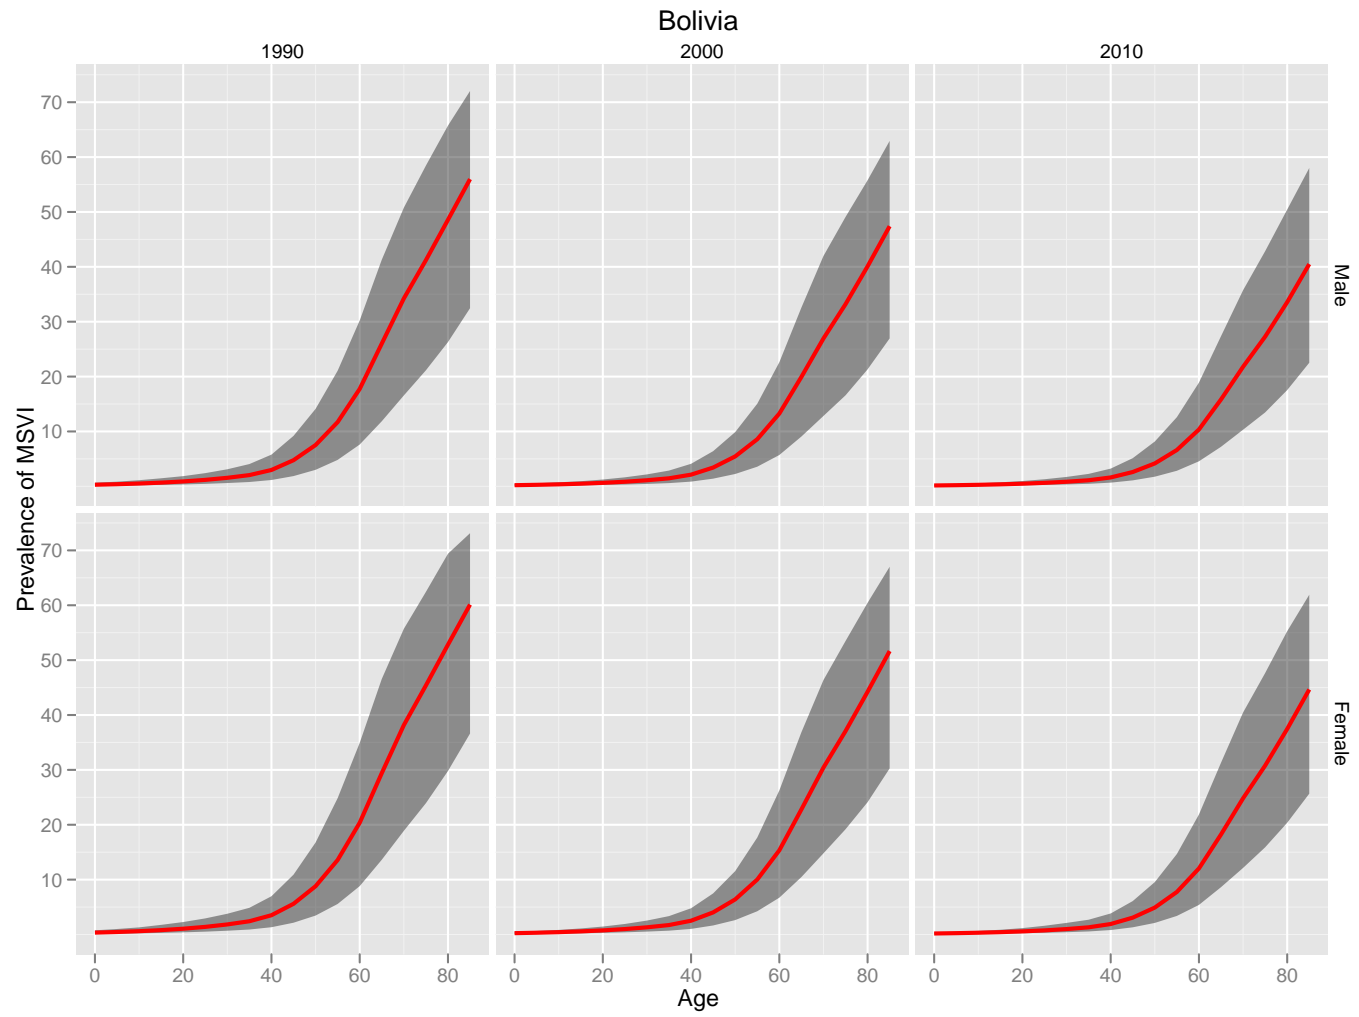

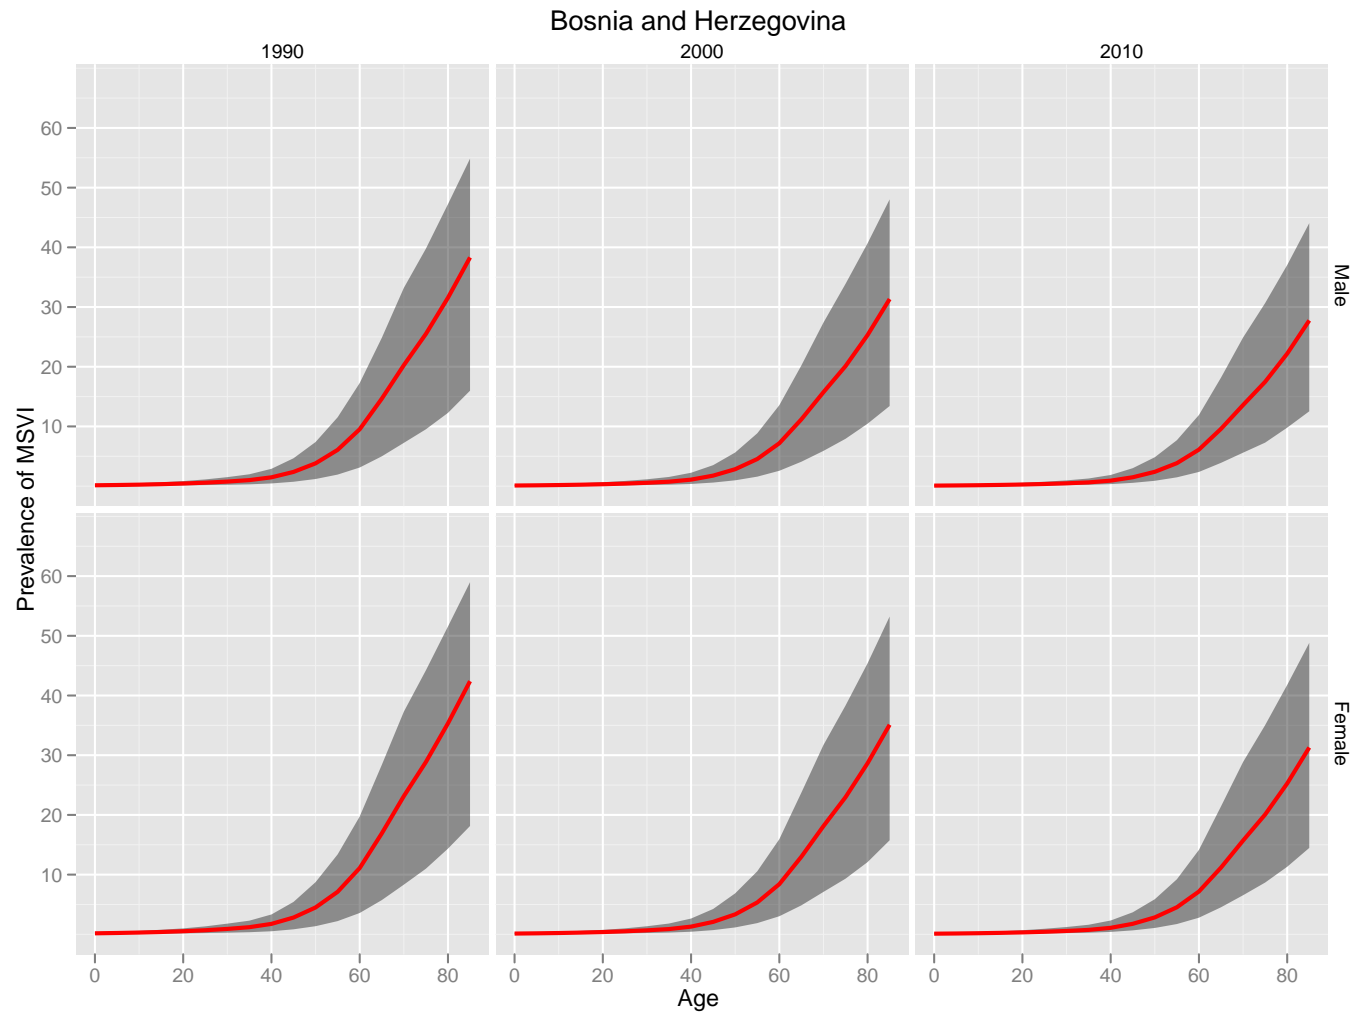



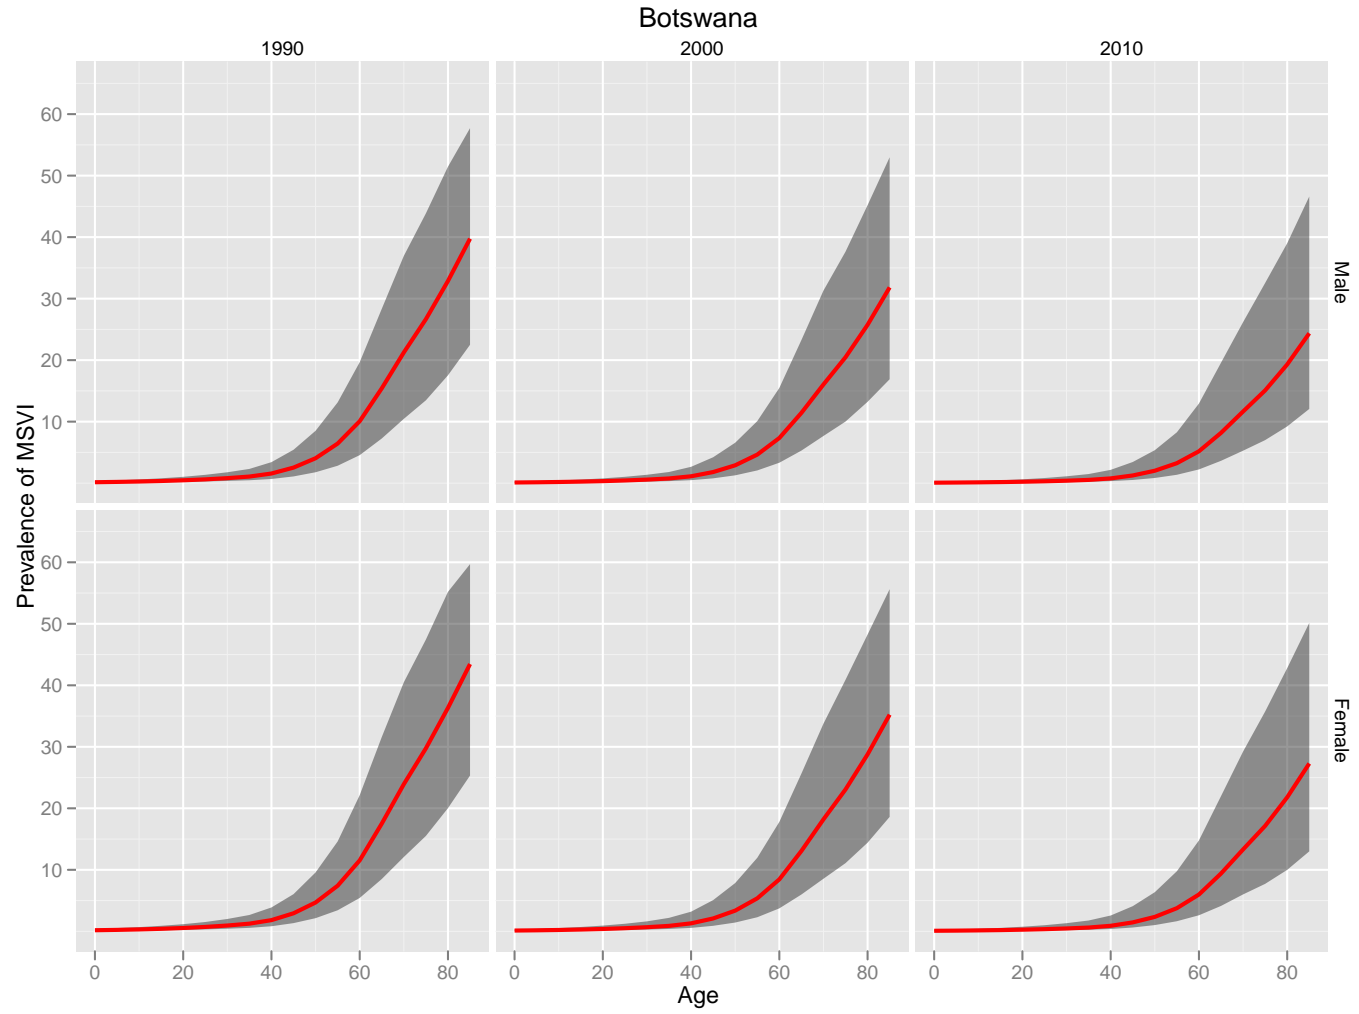

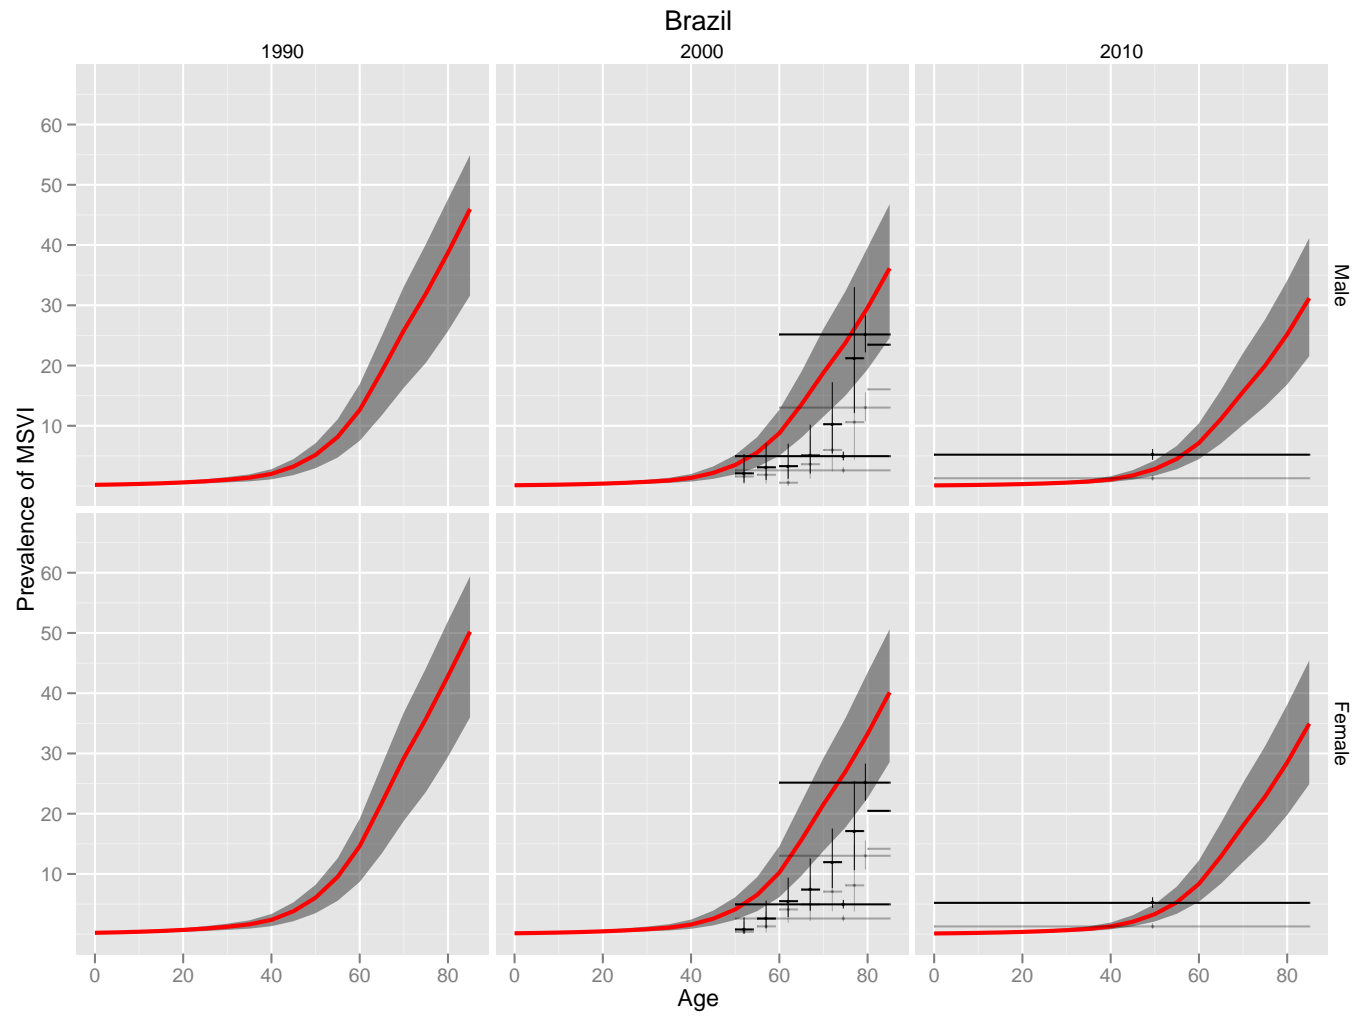

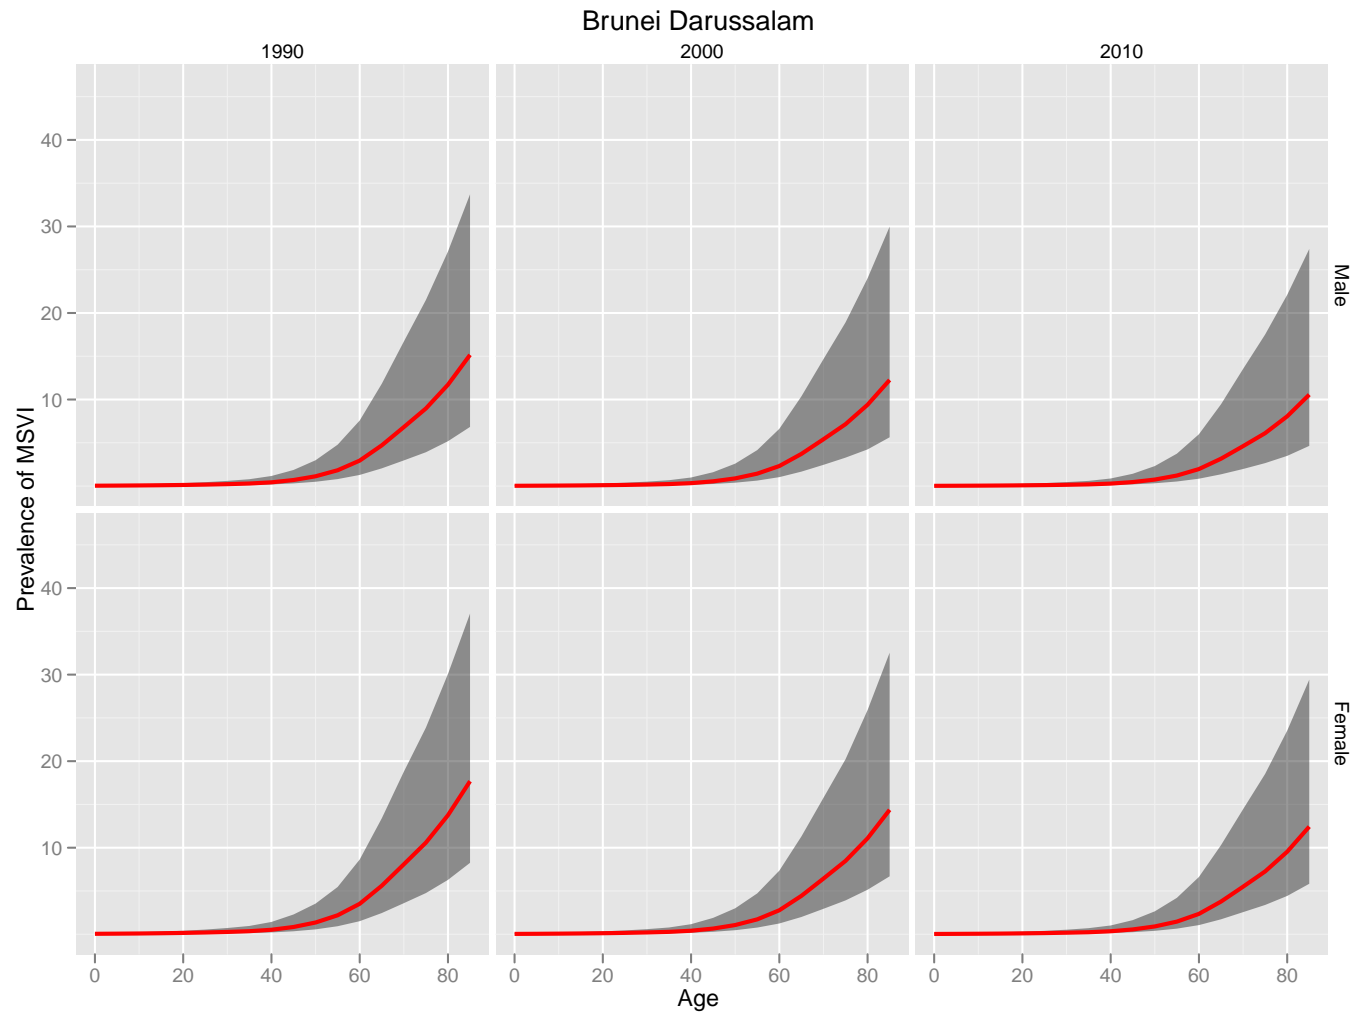

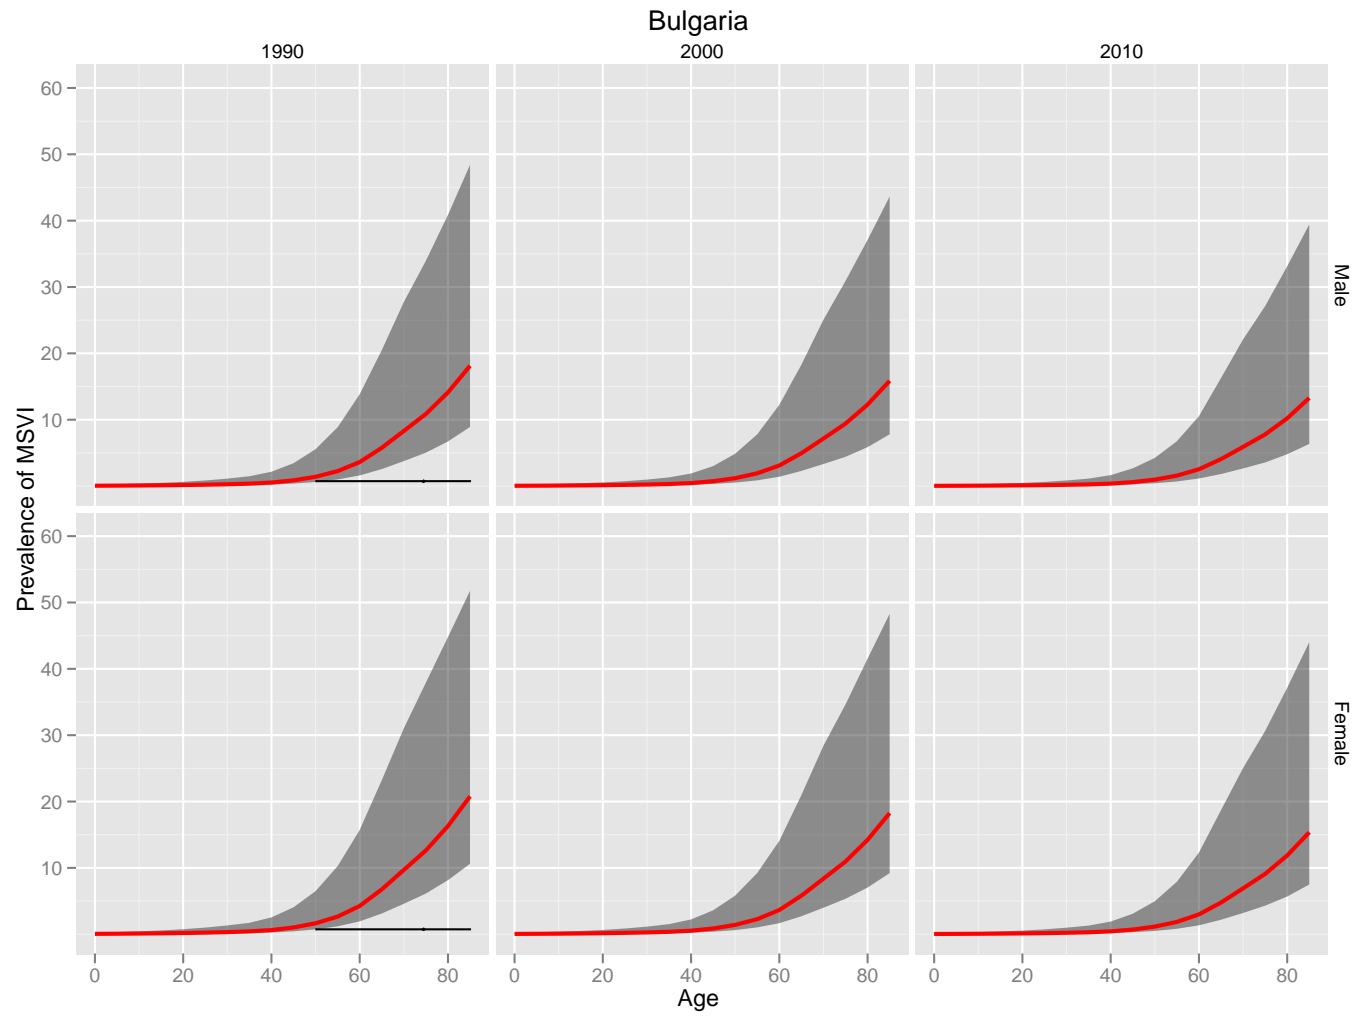

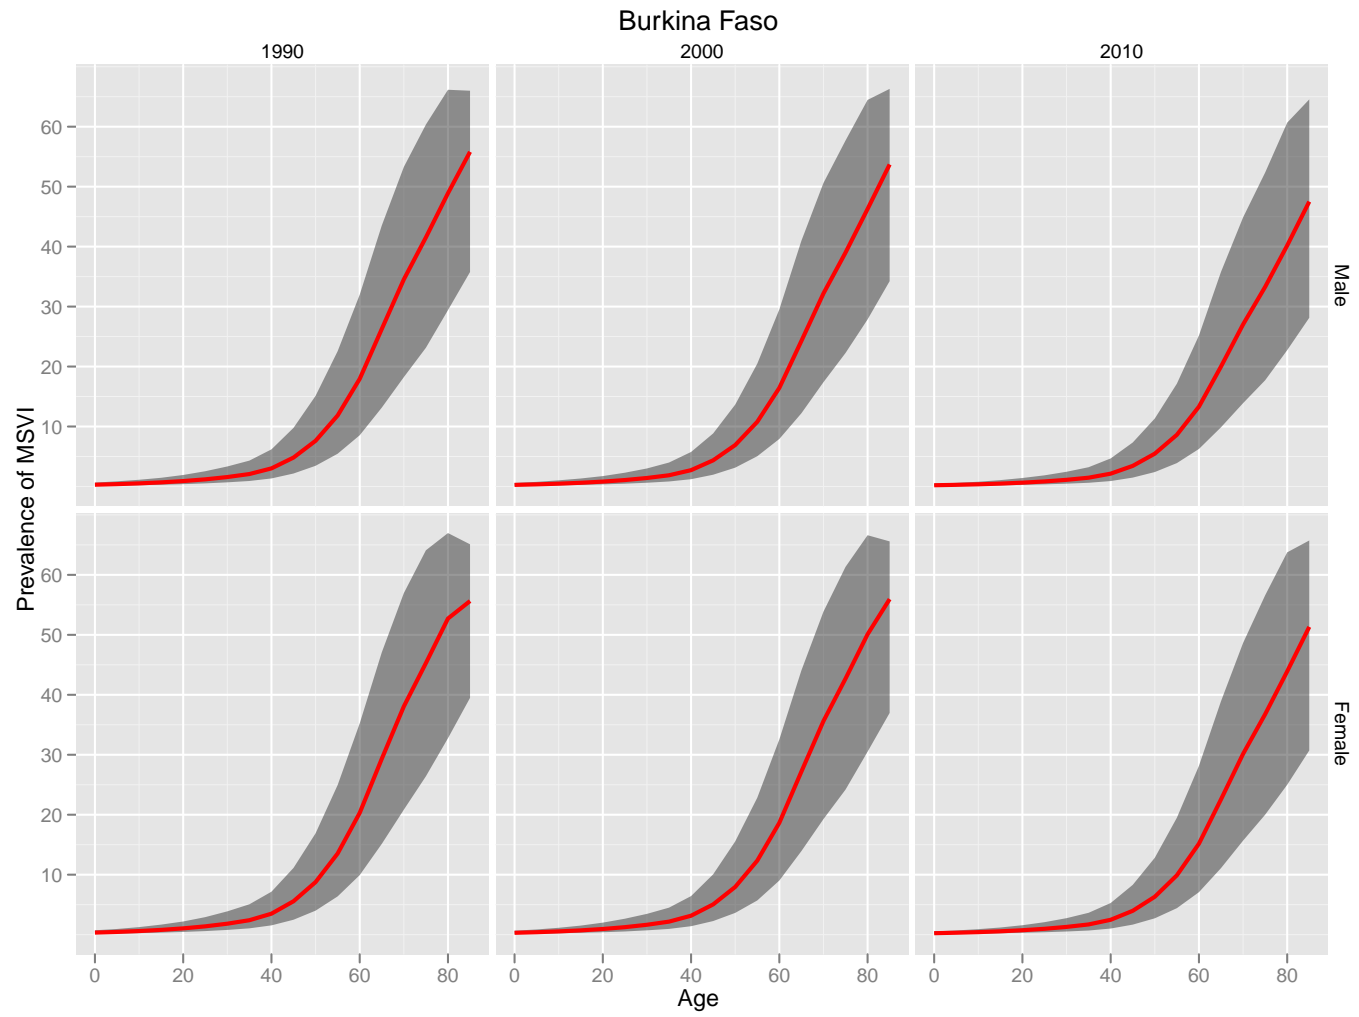

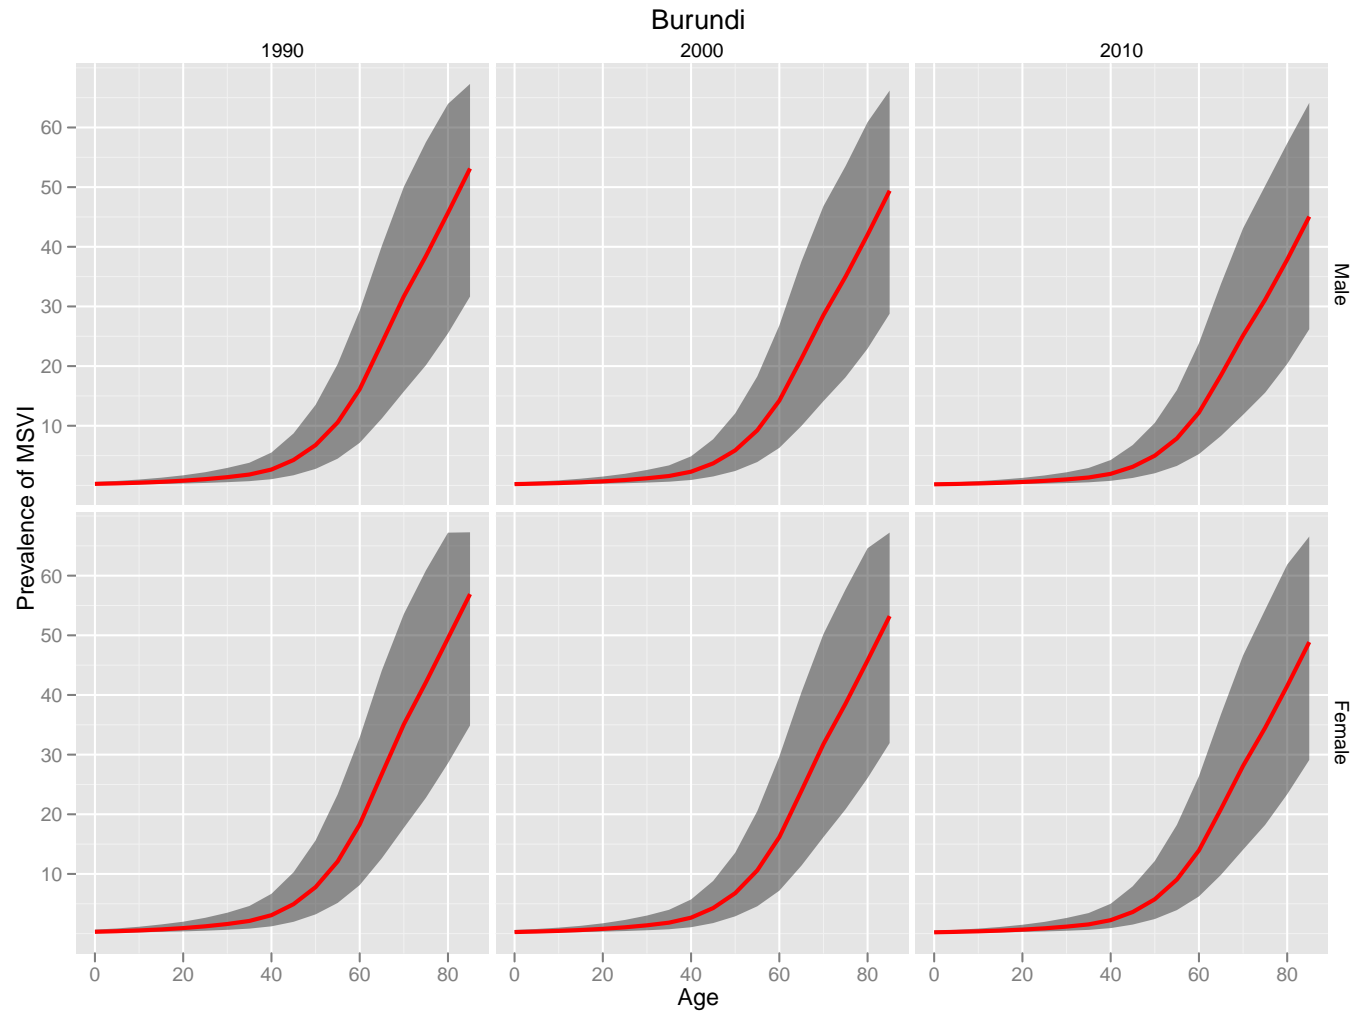

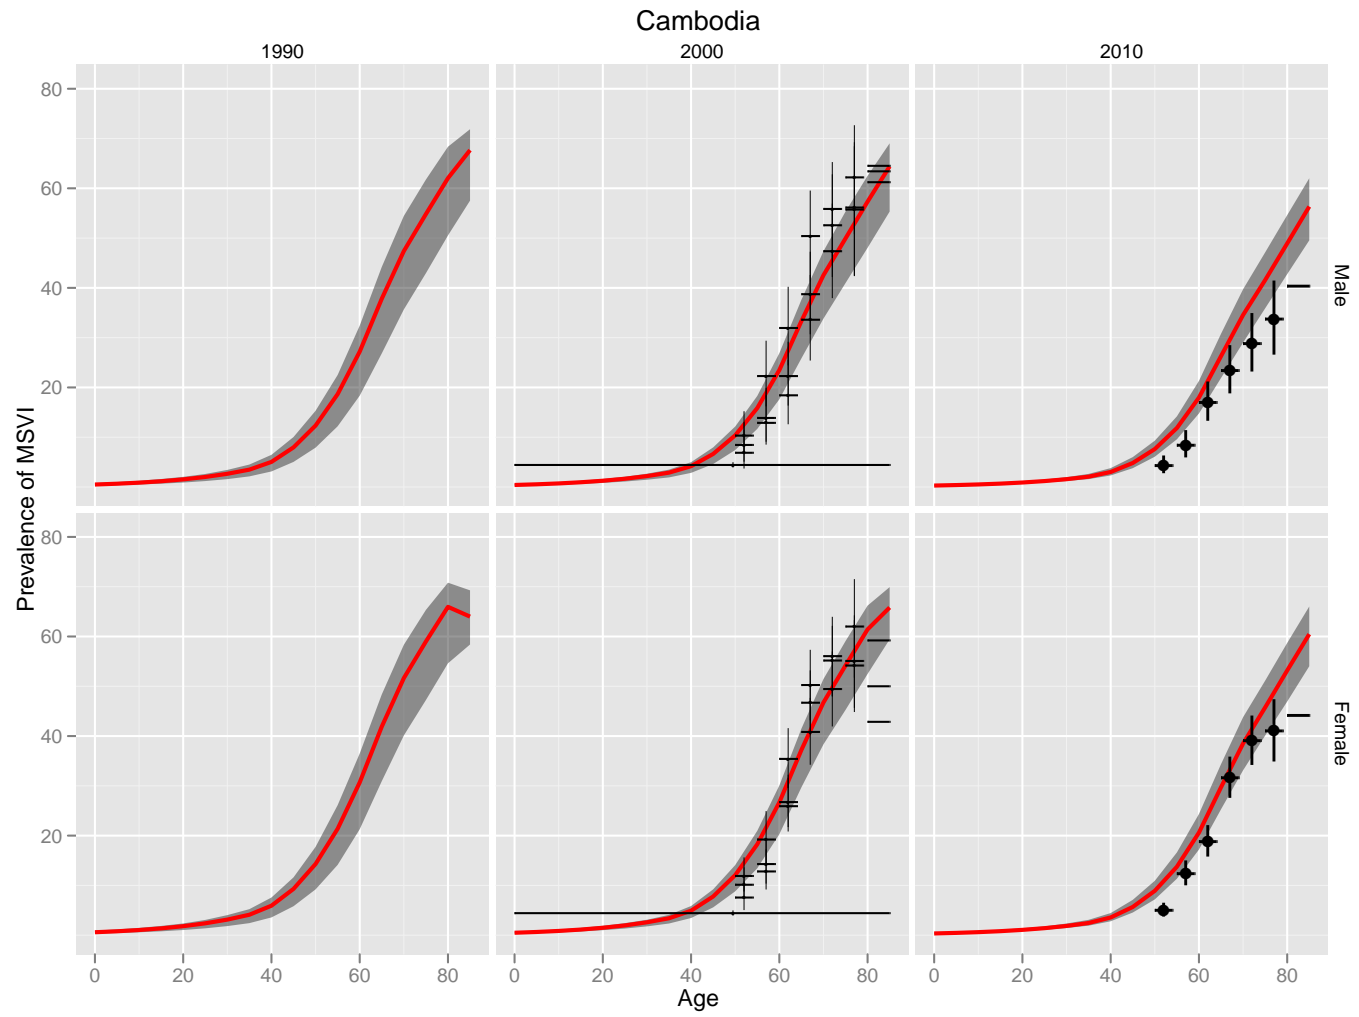

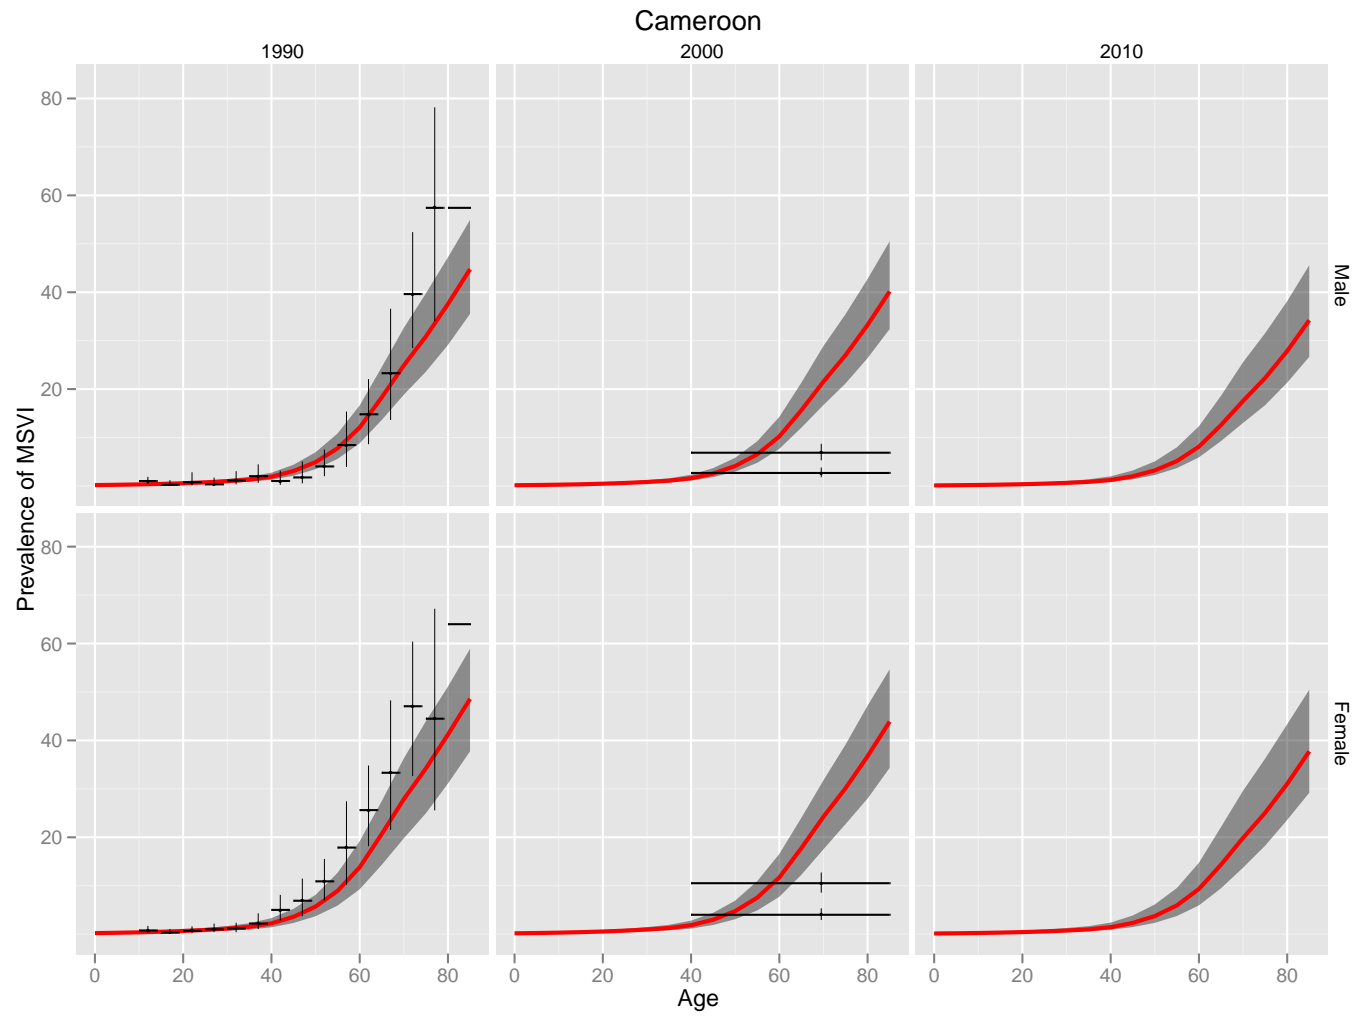



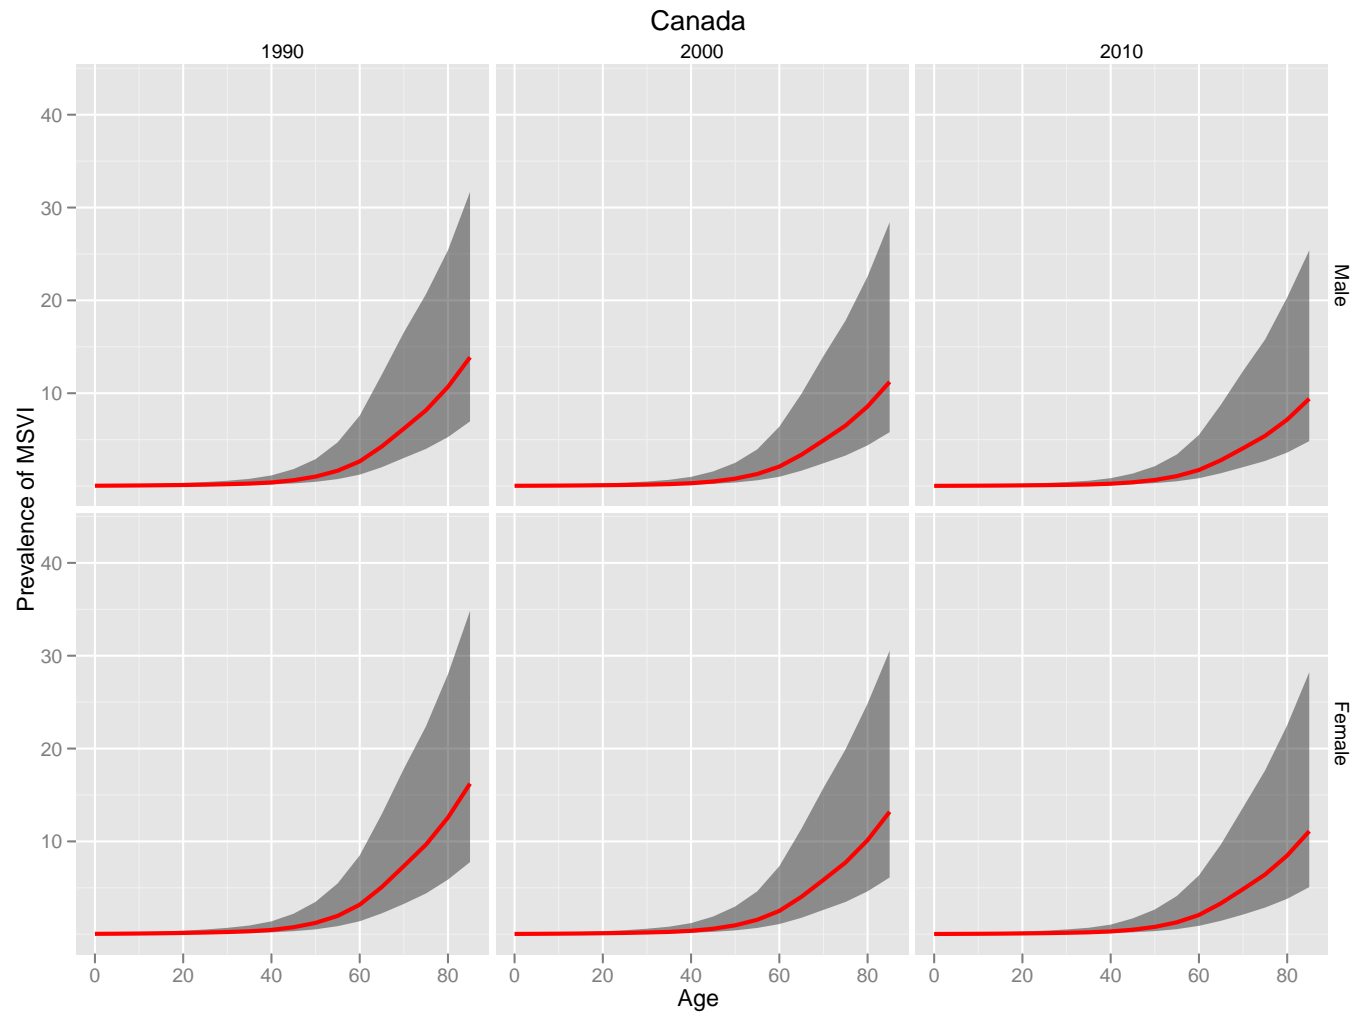

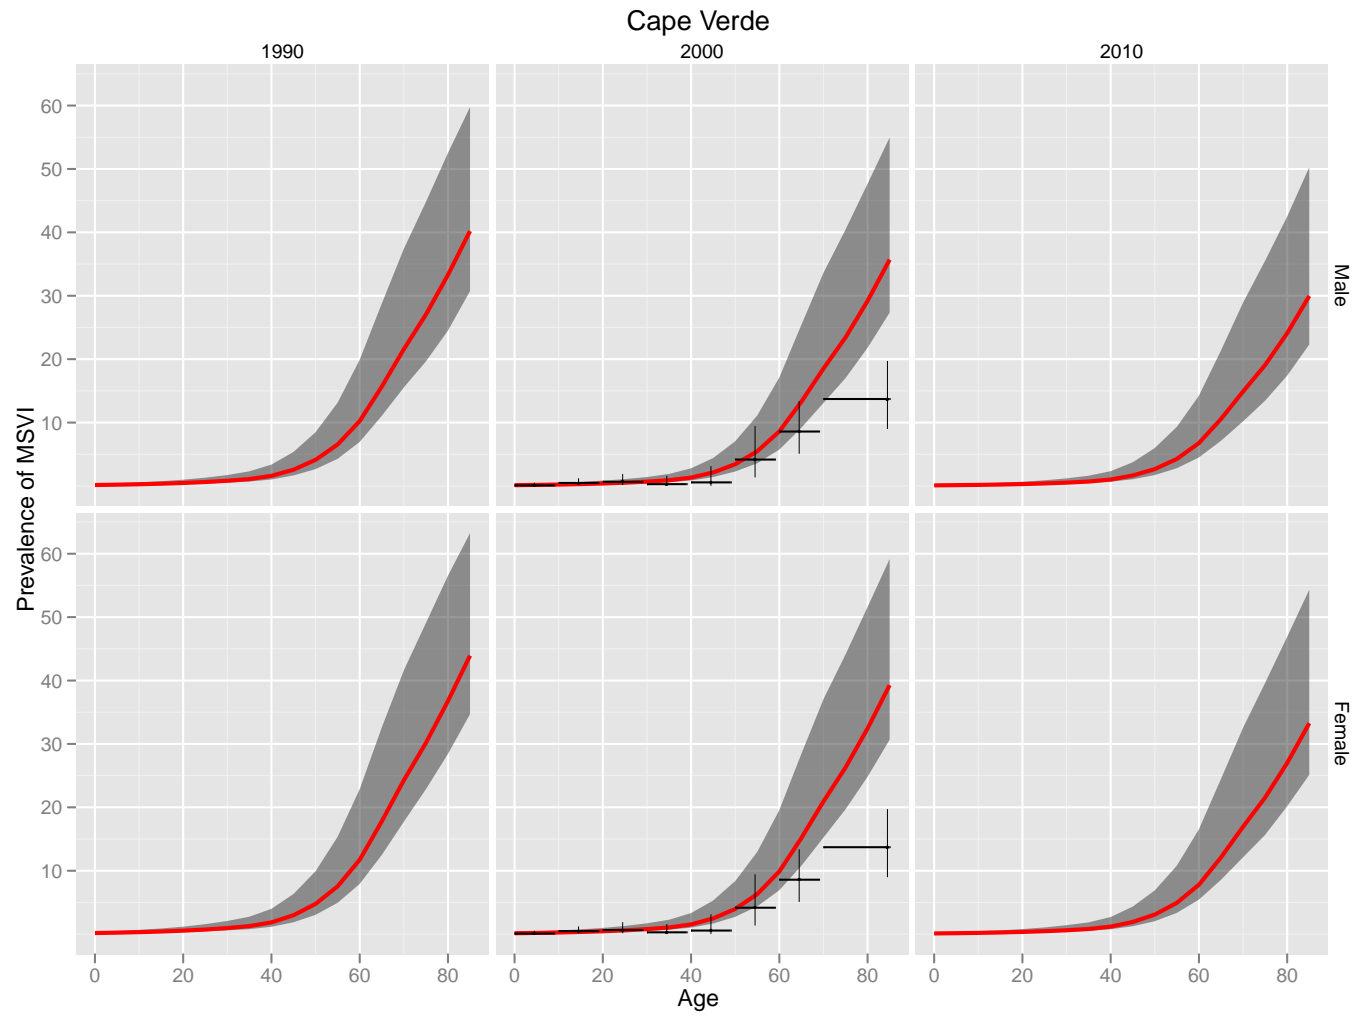

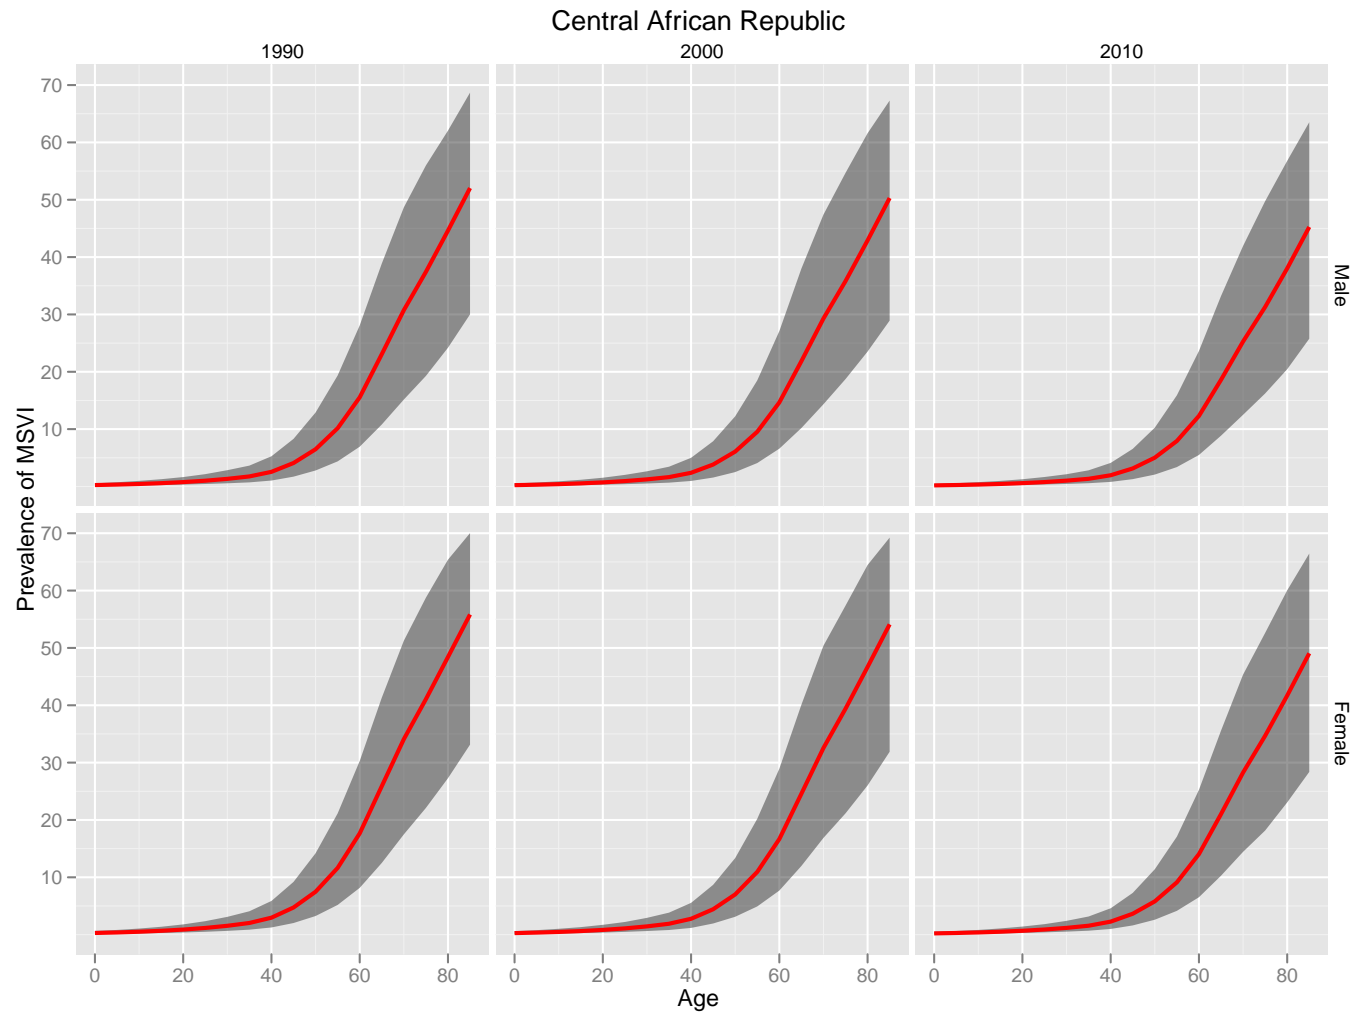

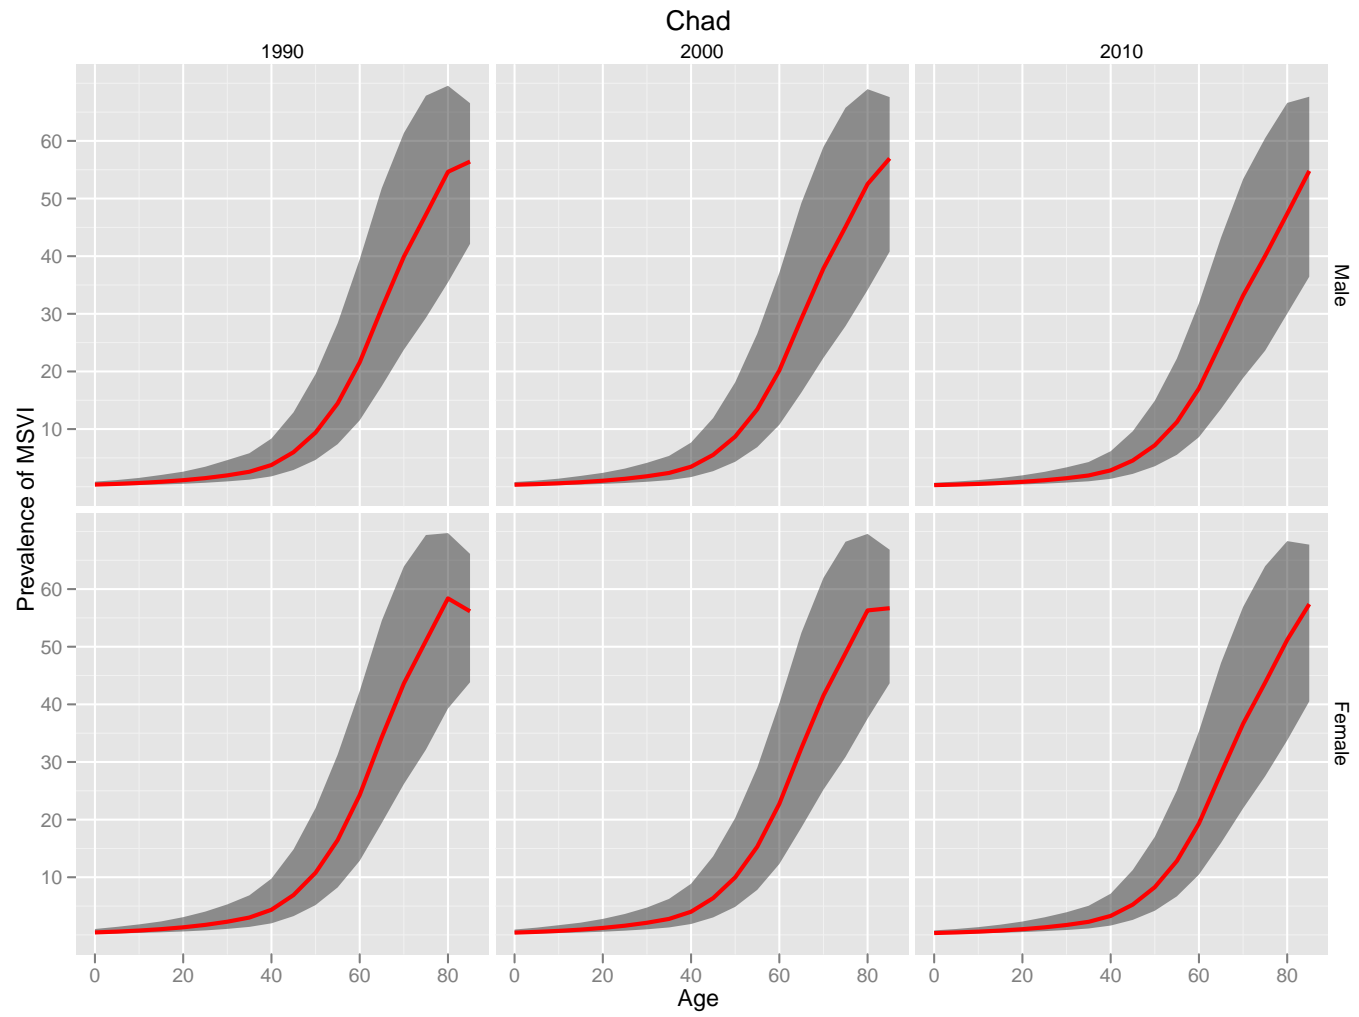

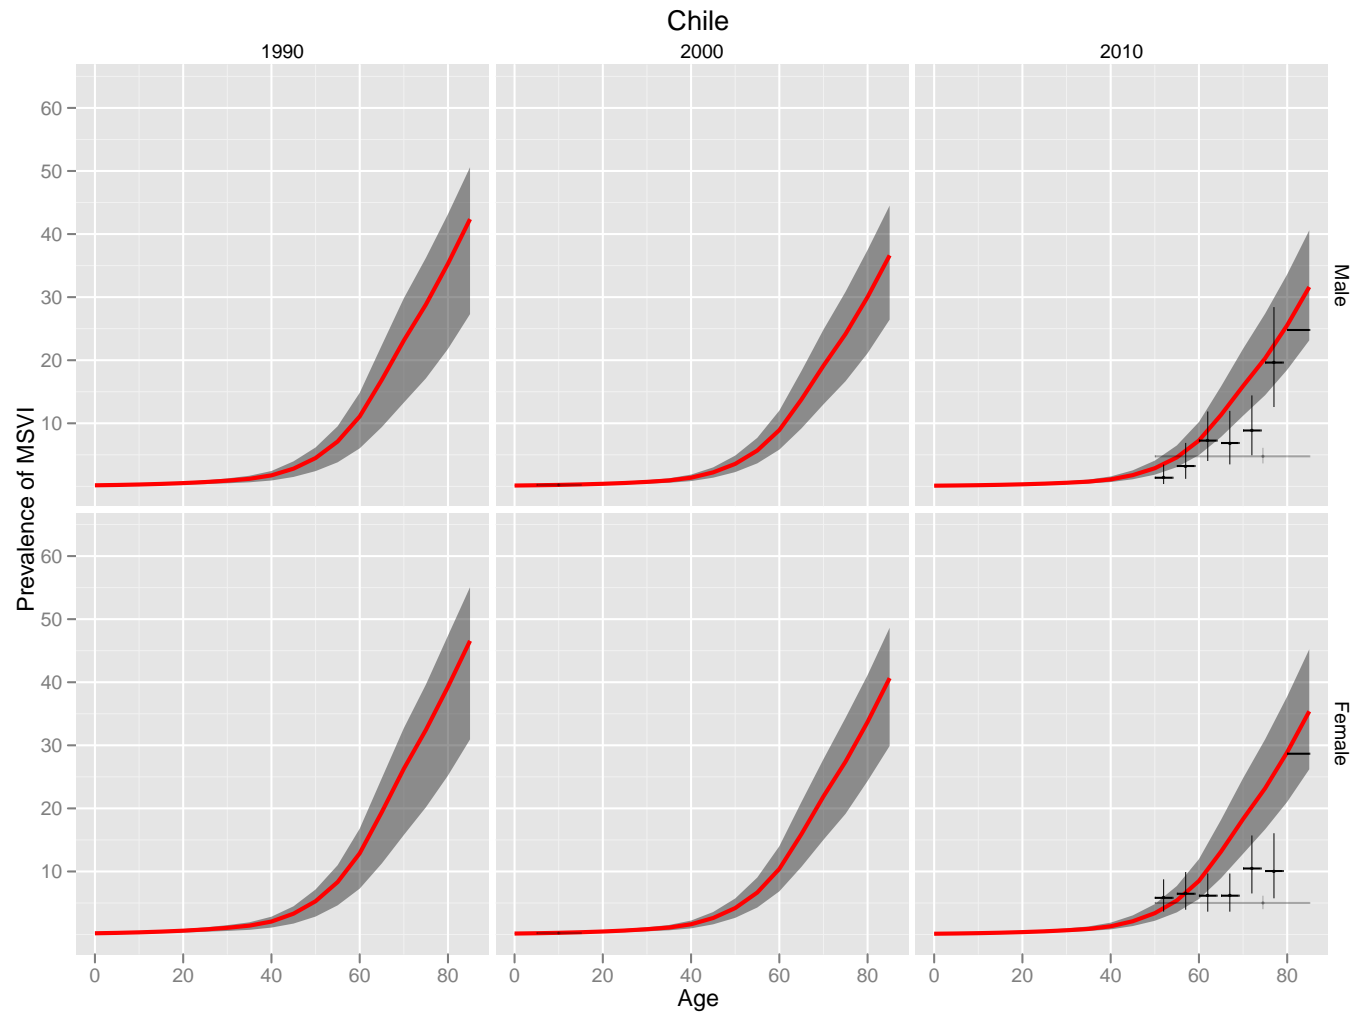

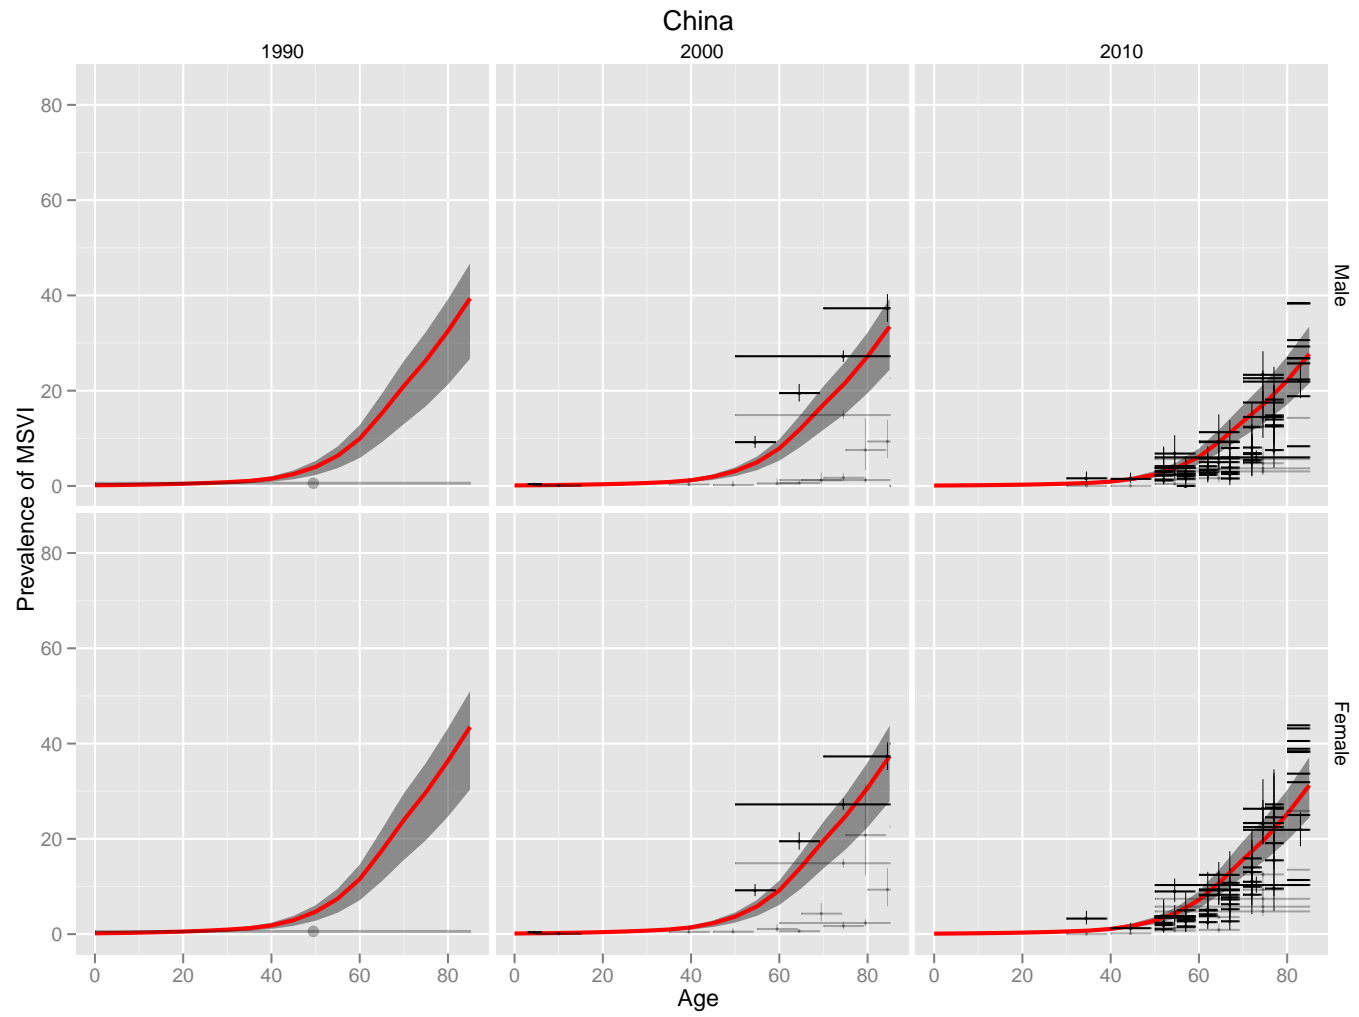

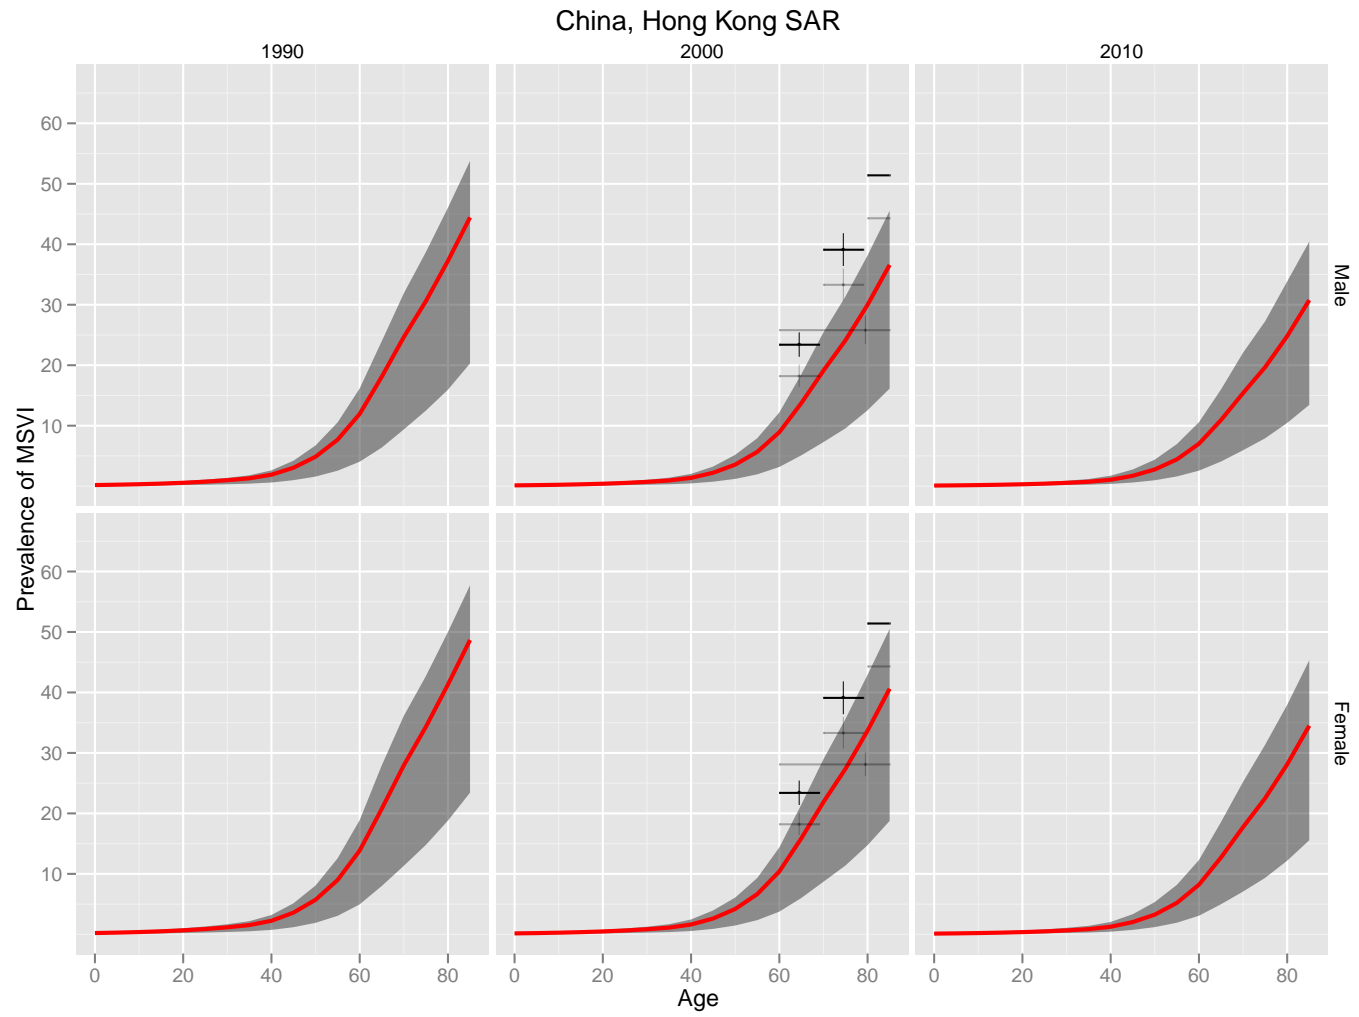

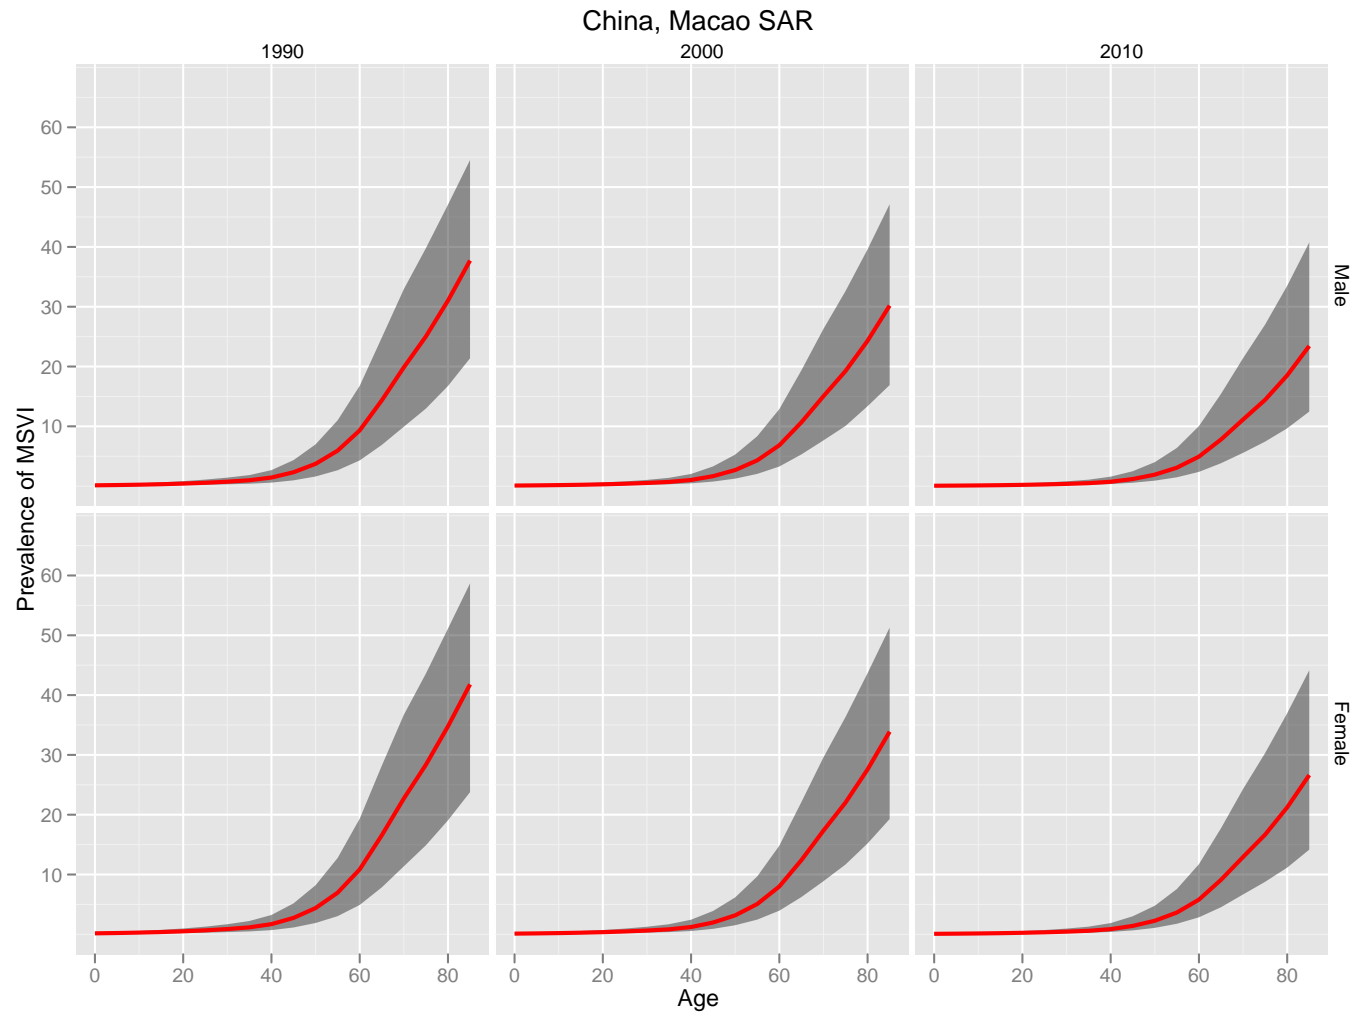



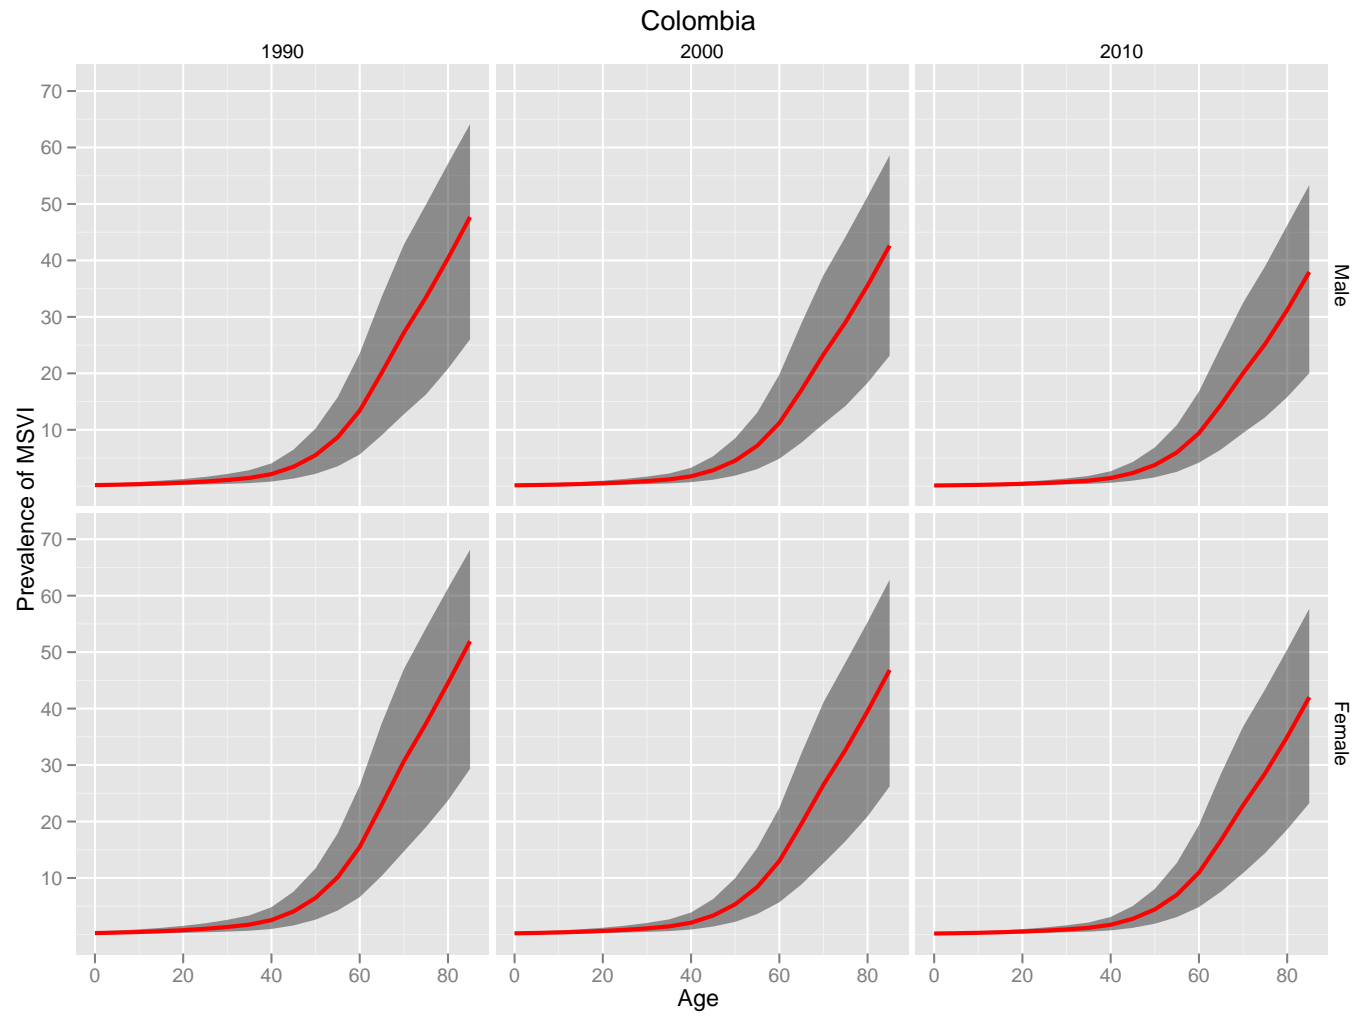

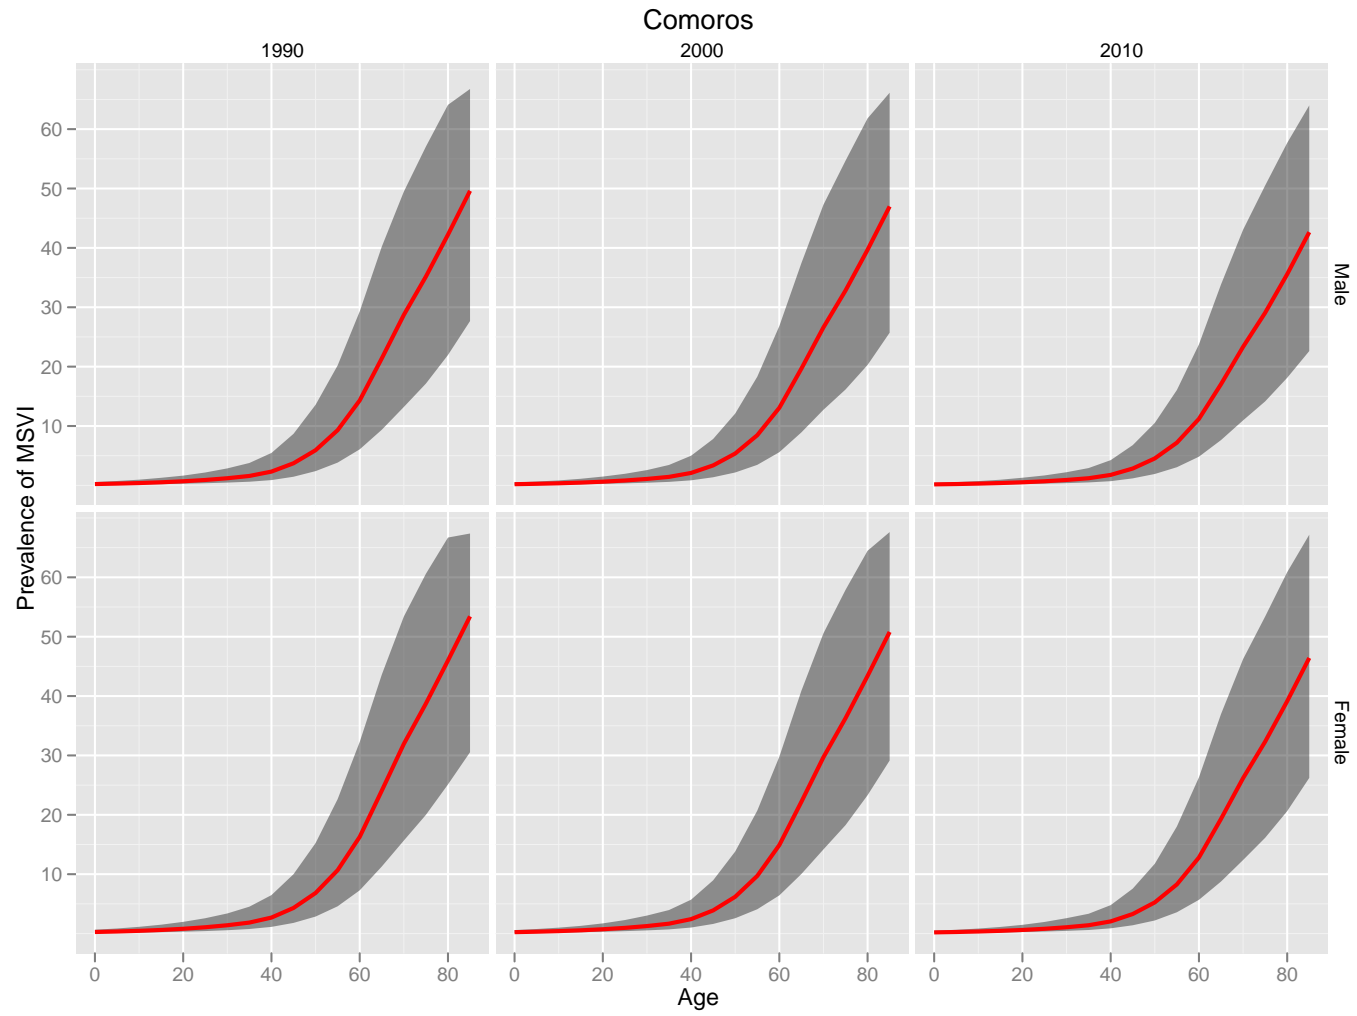

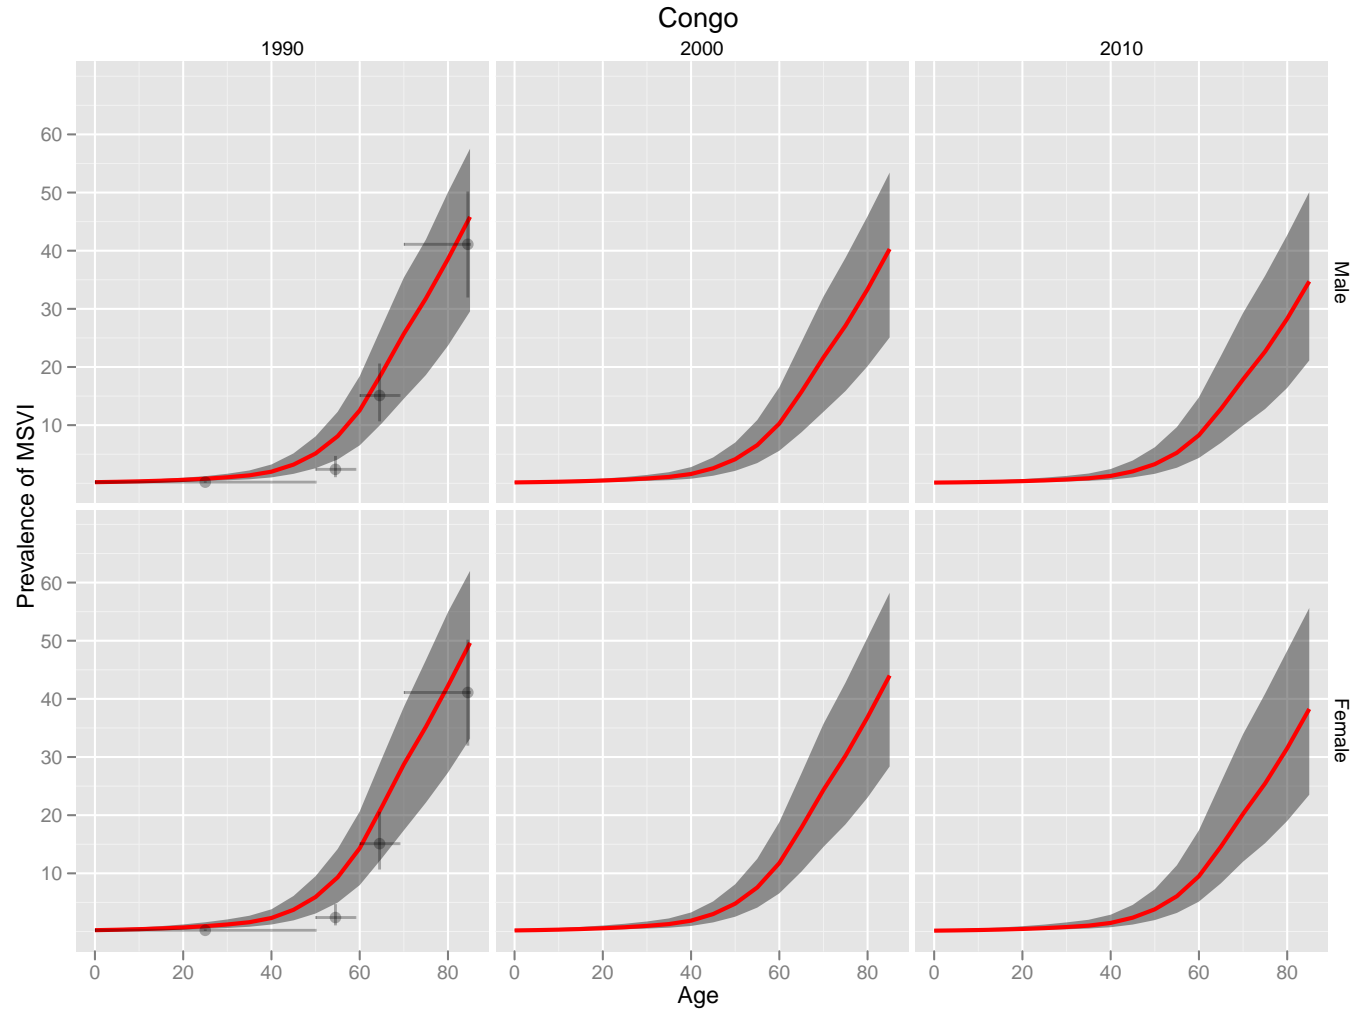

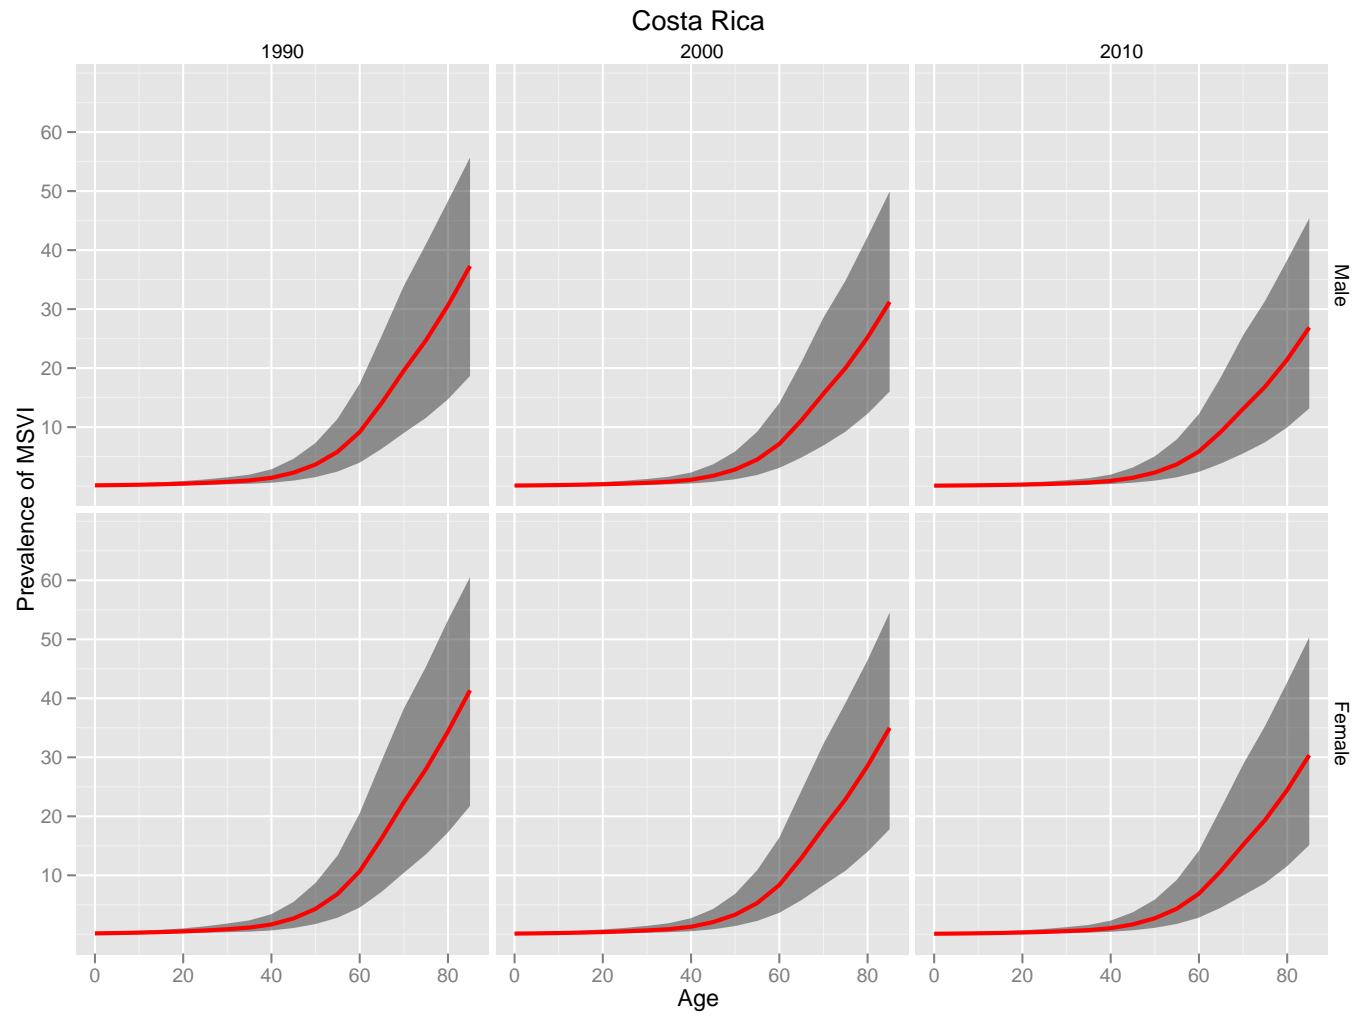

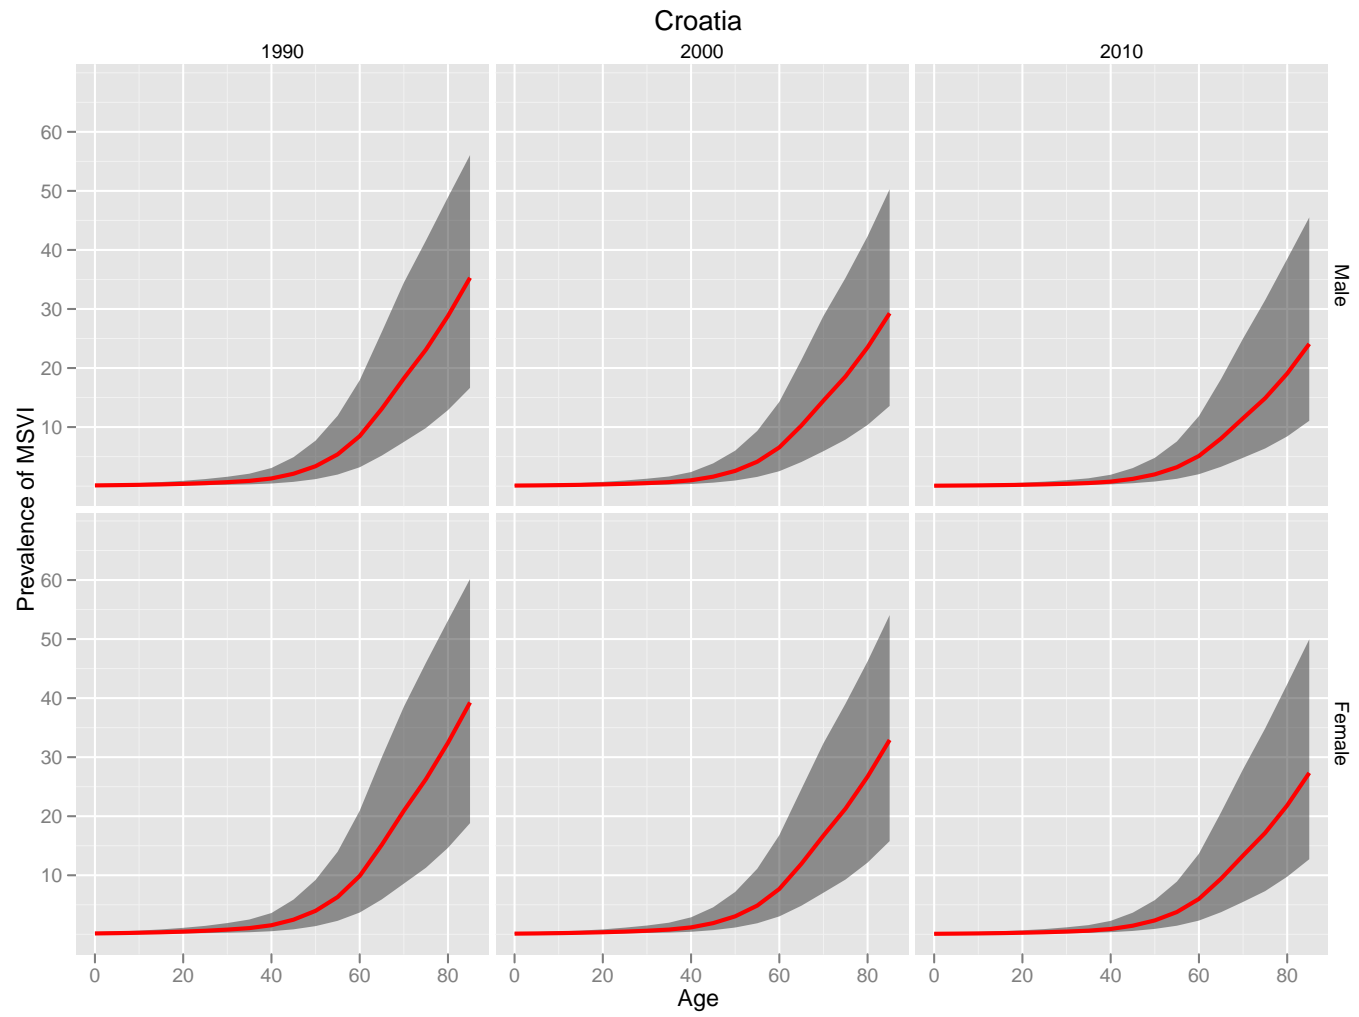

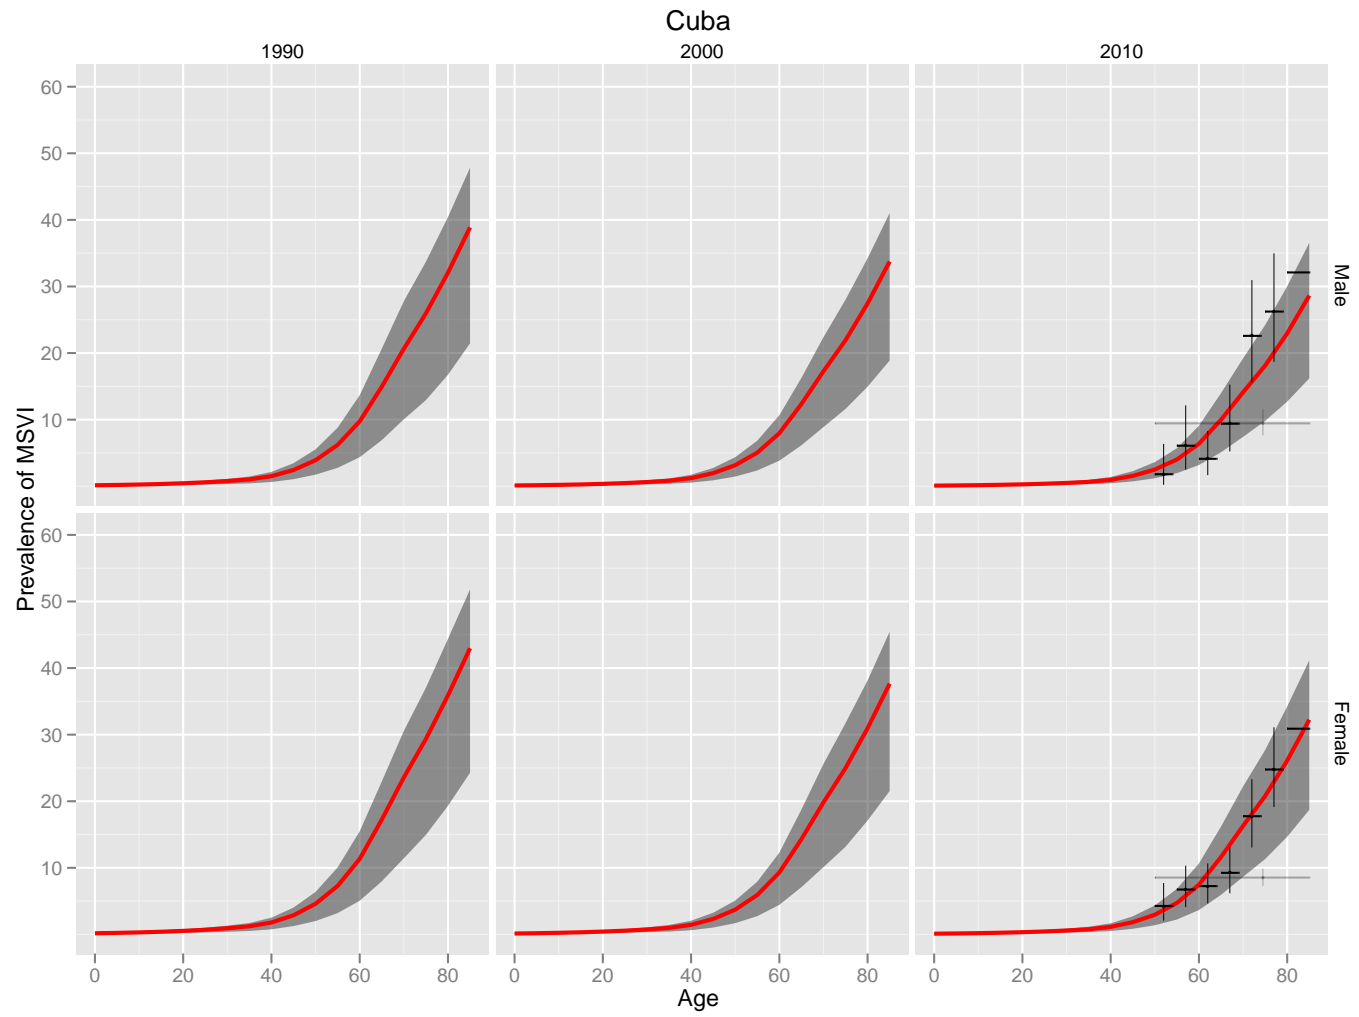

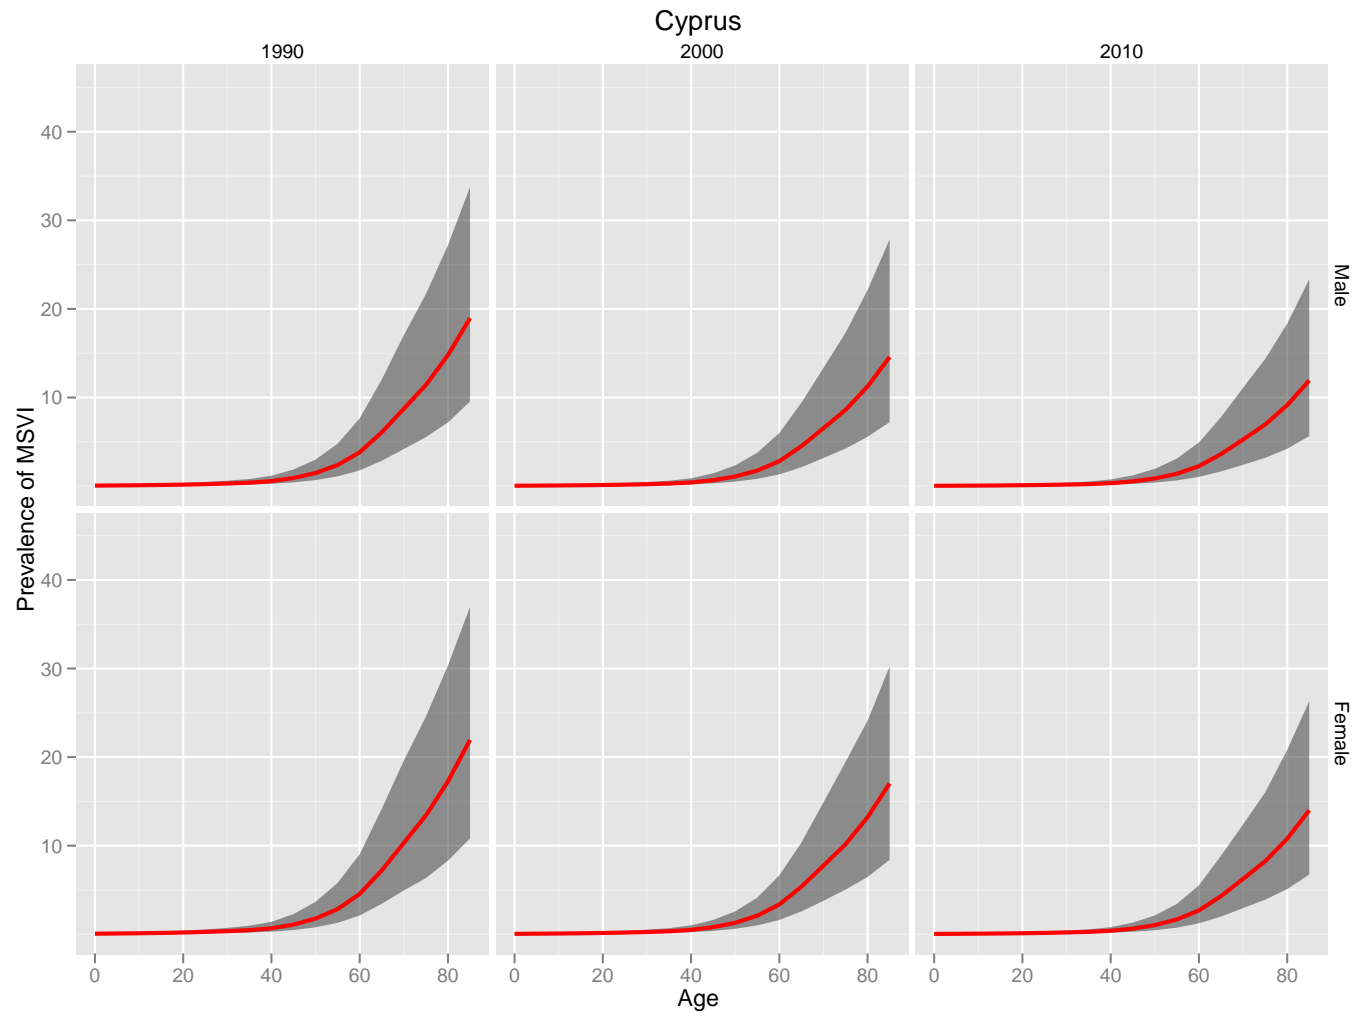

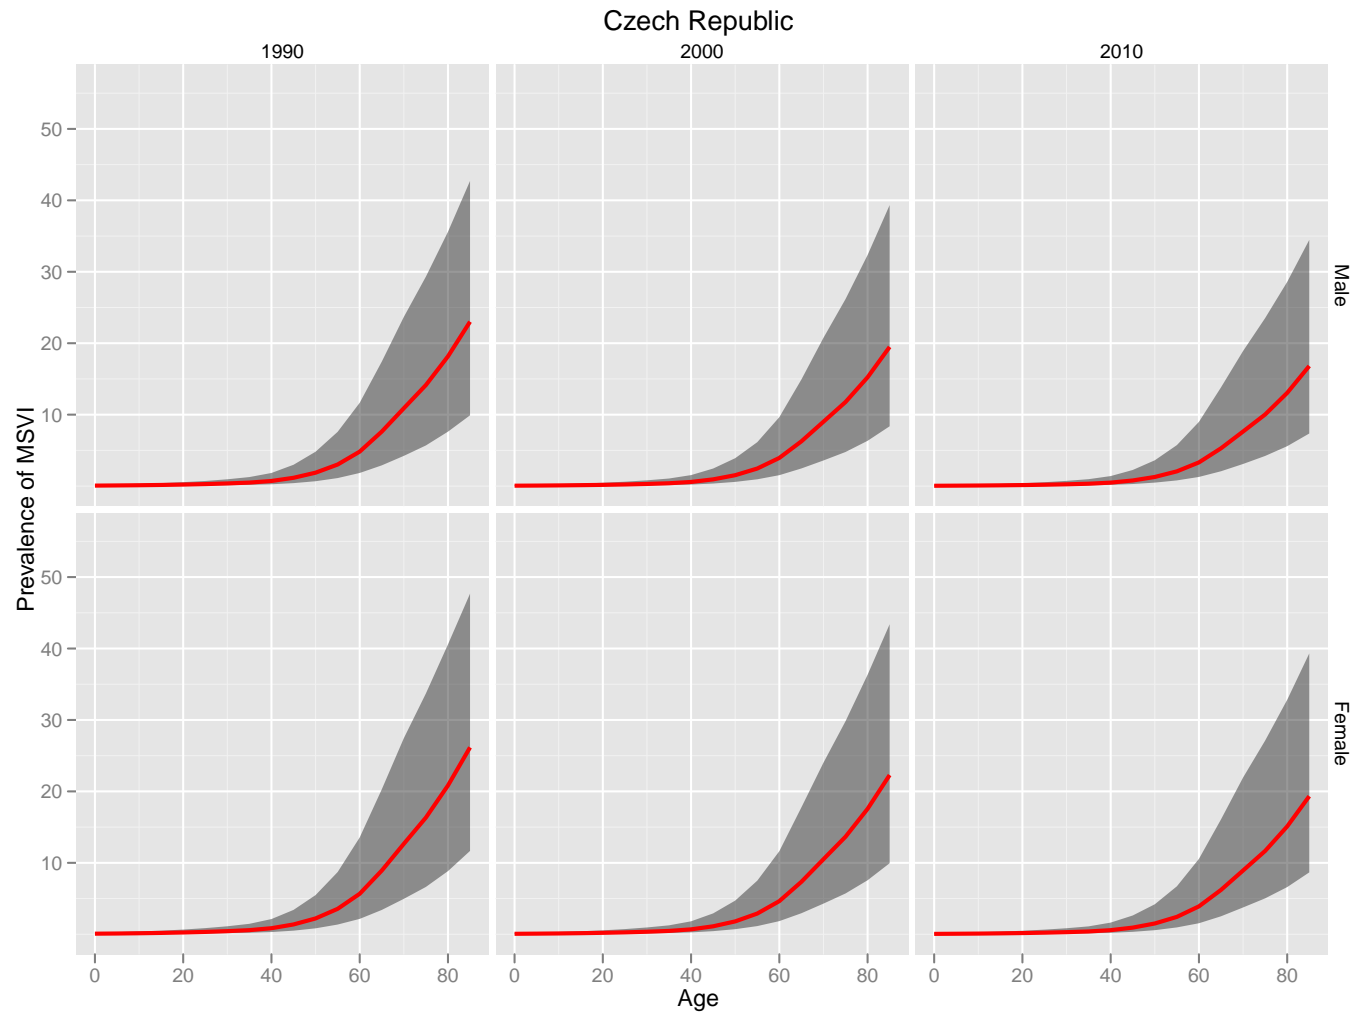



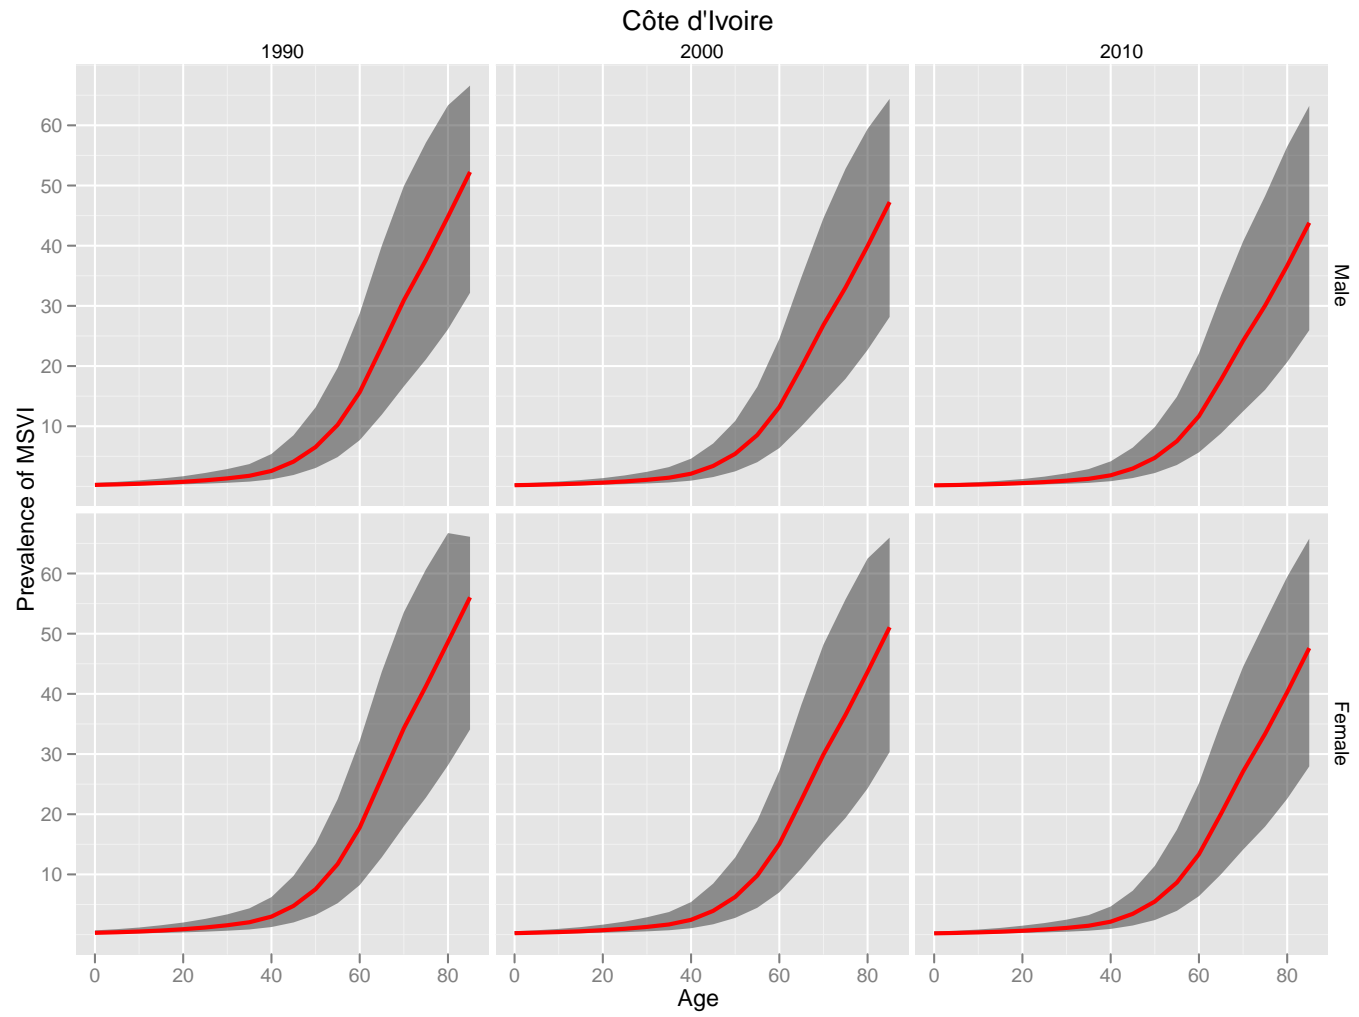

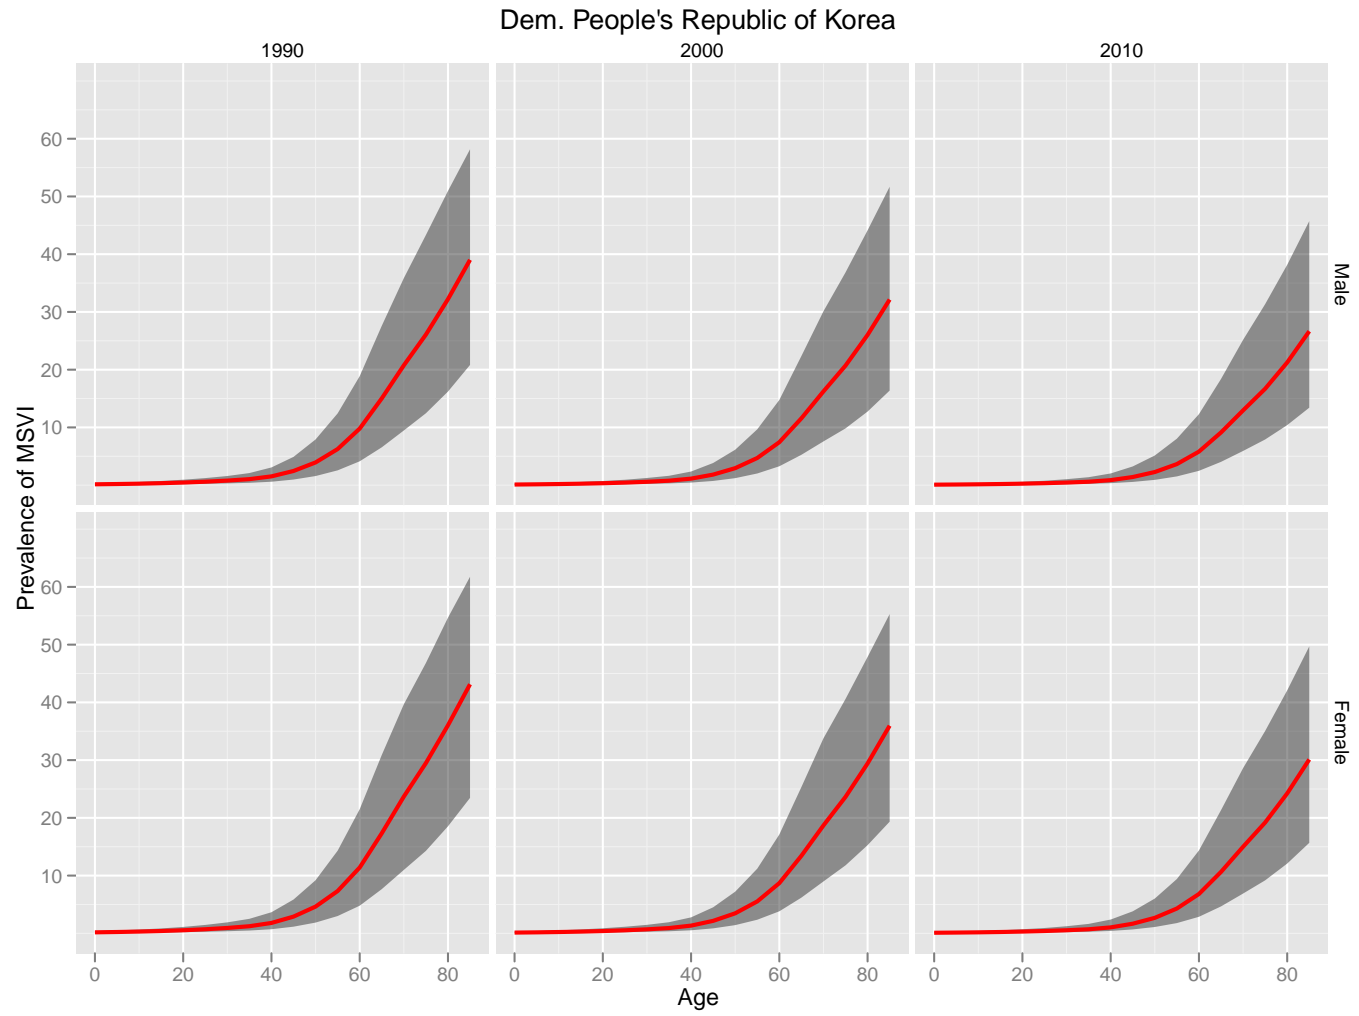

Democratic Republic of the Congo

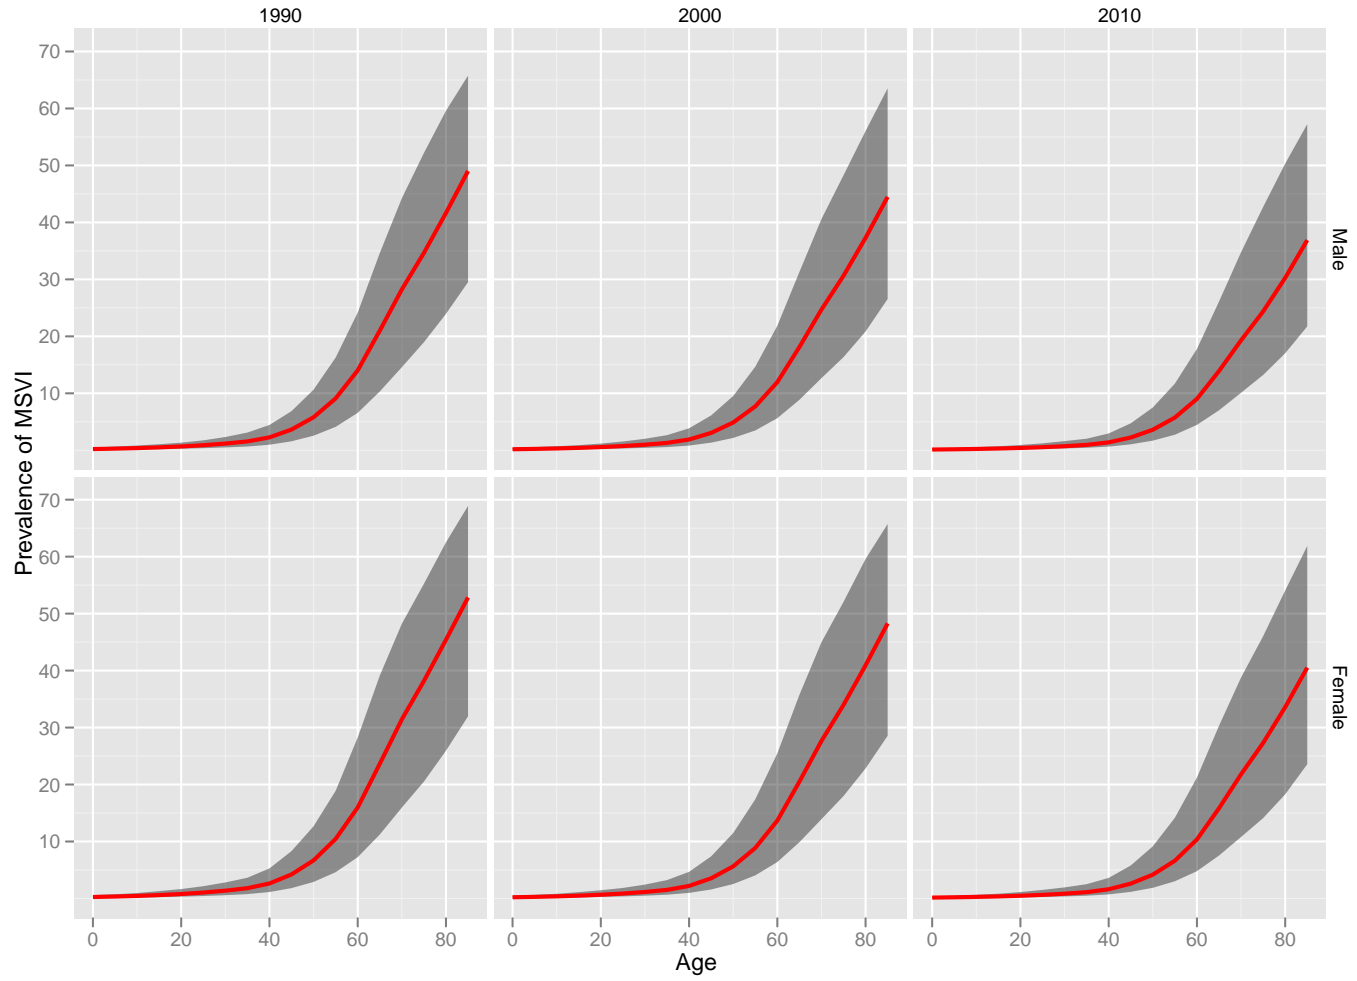

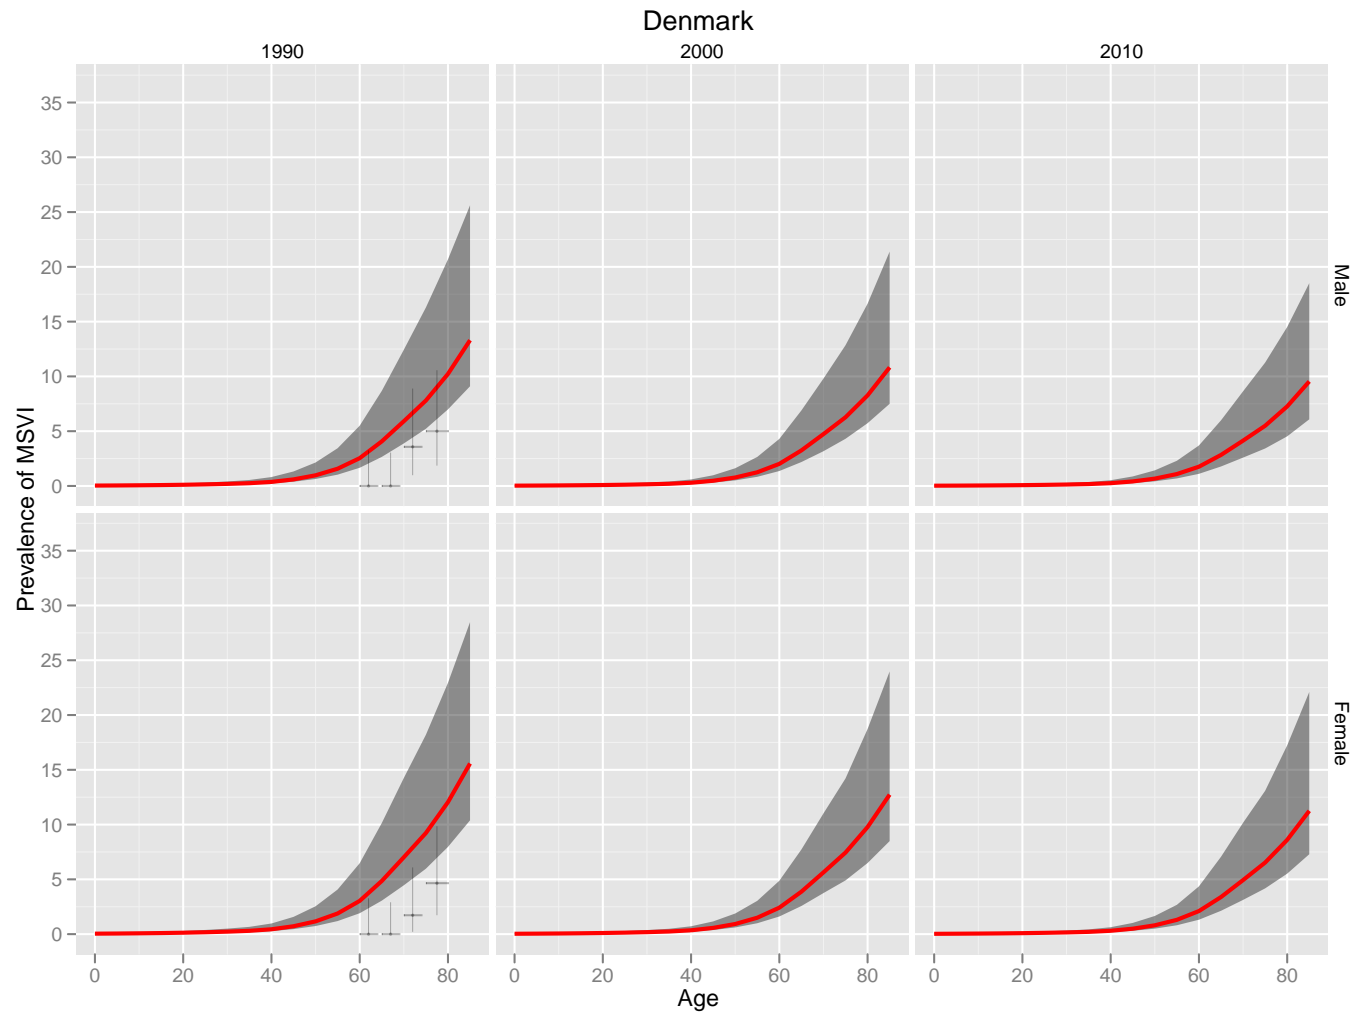

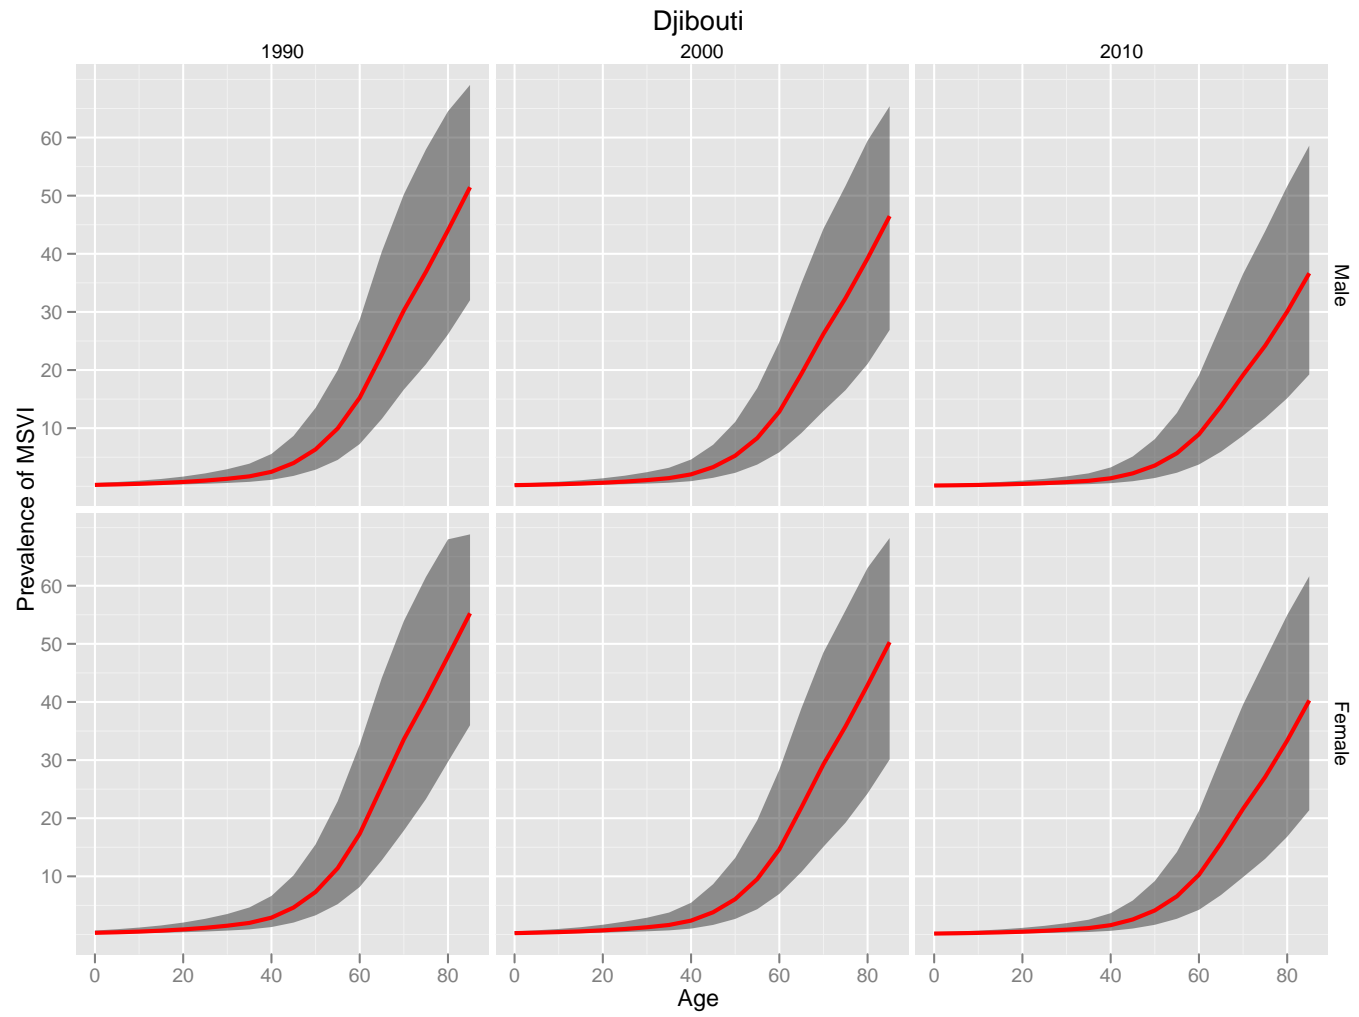

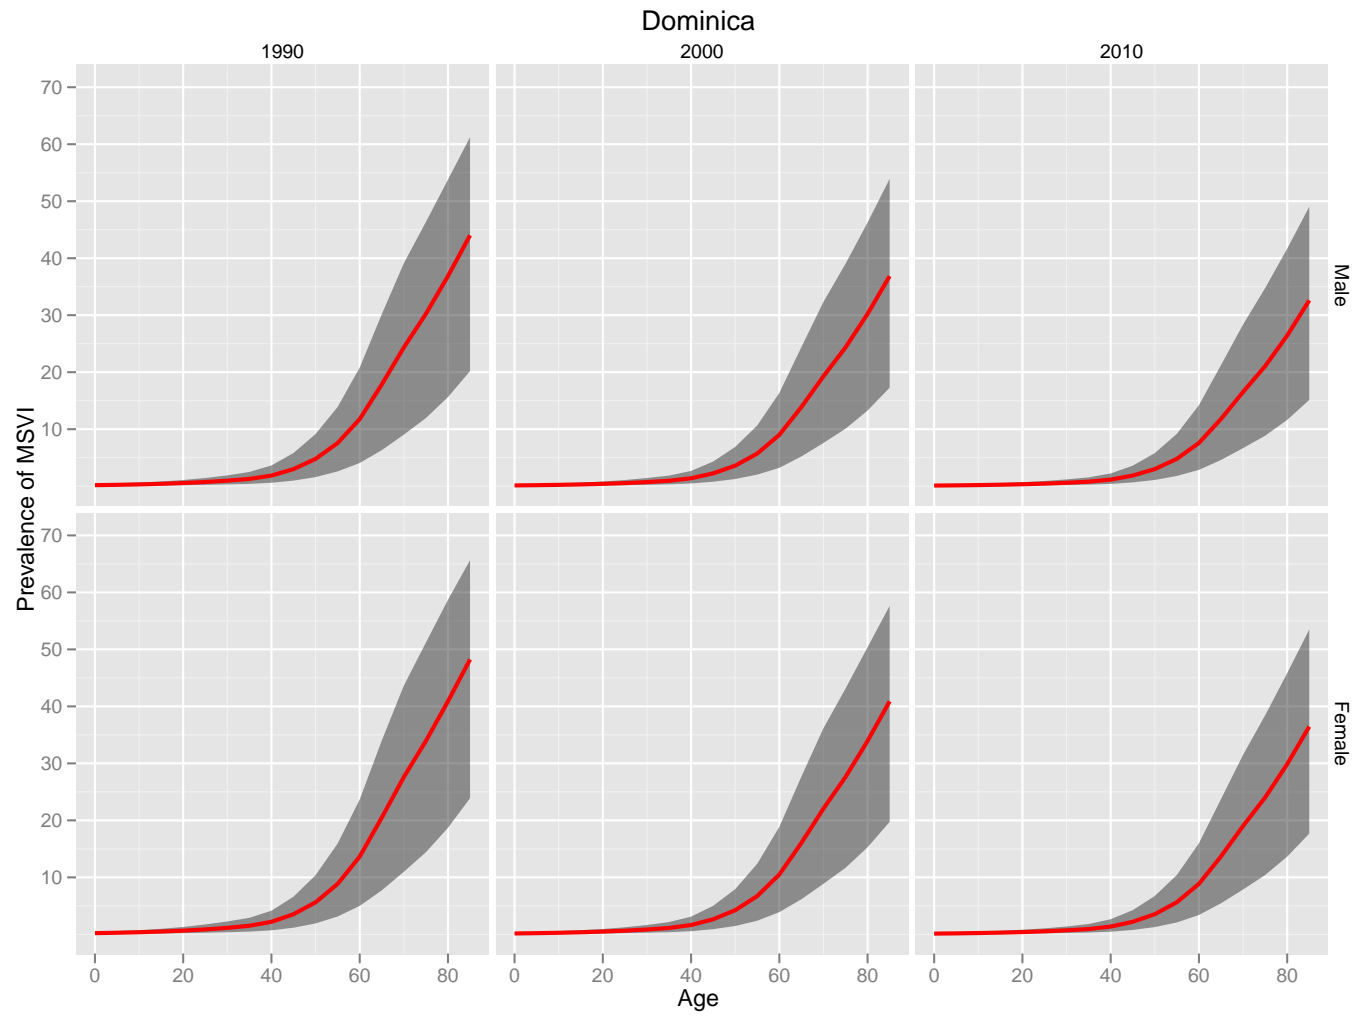

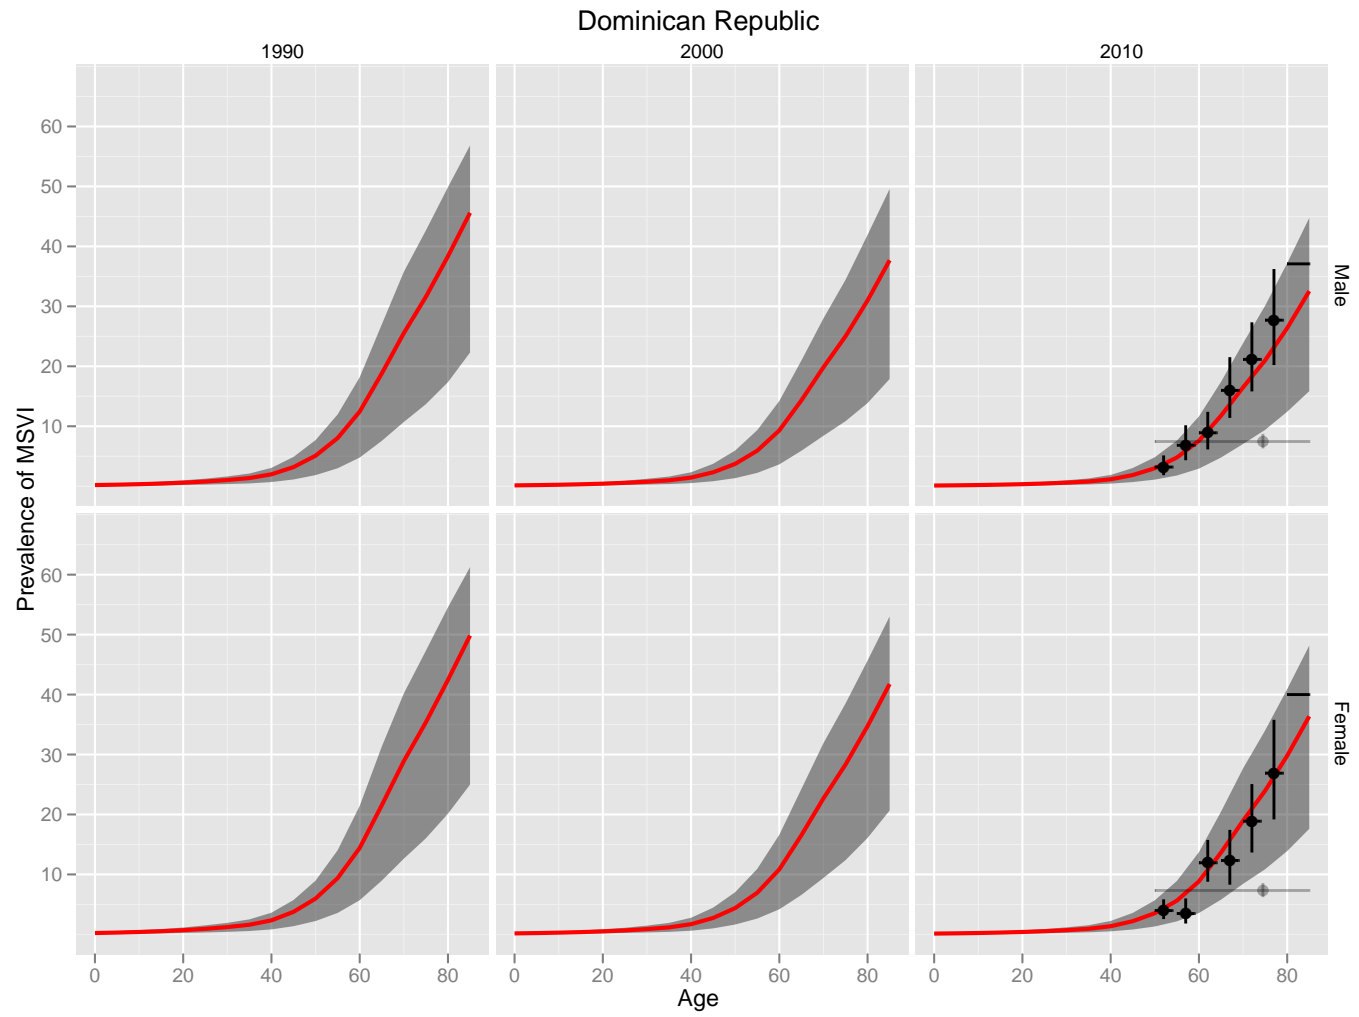

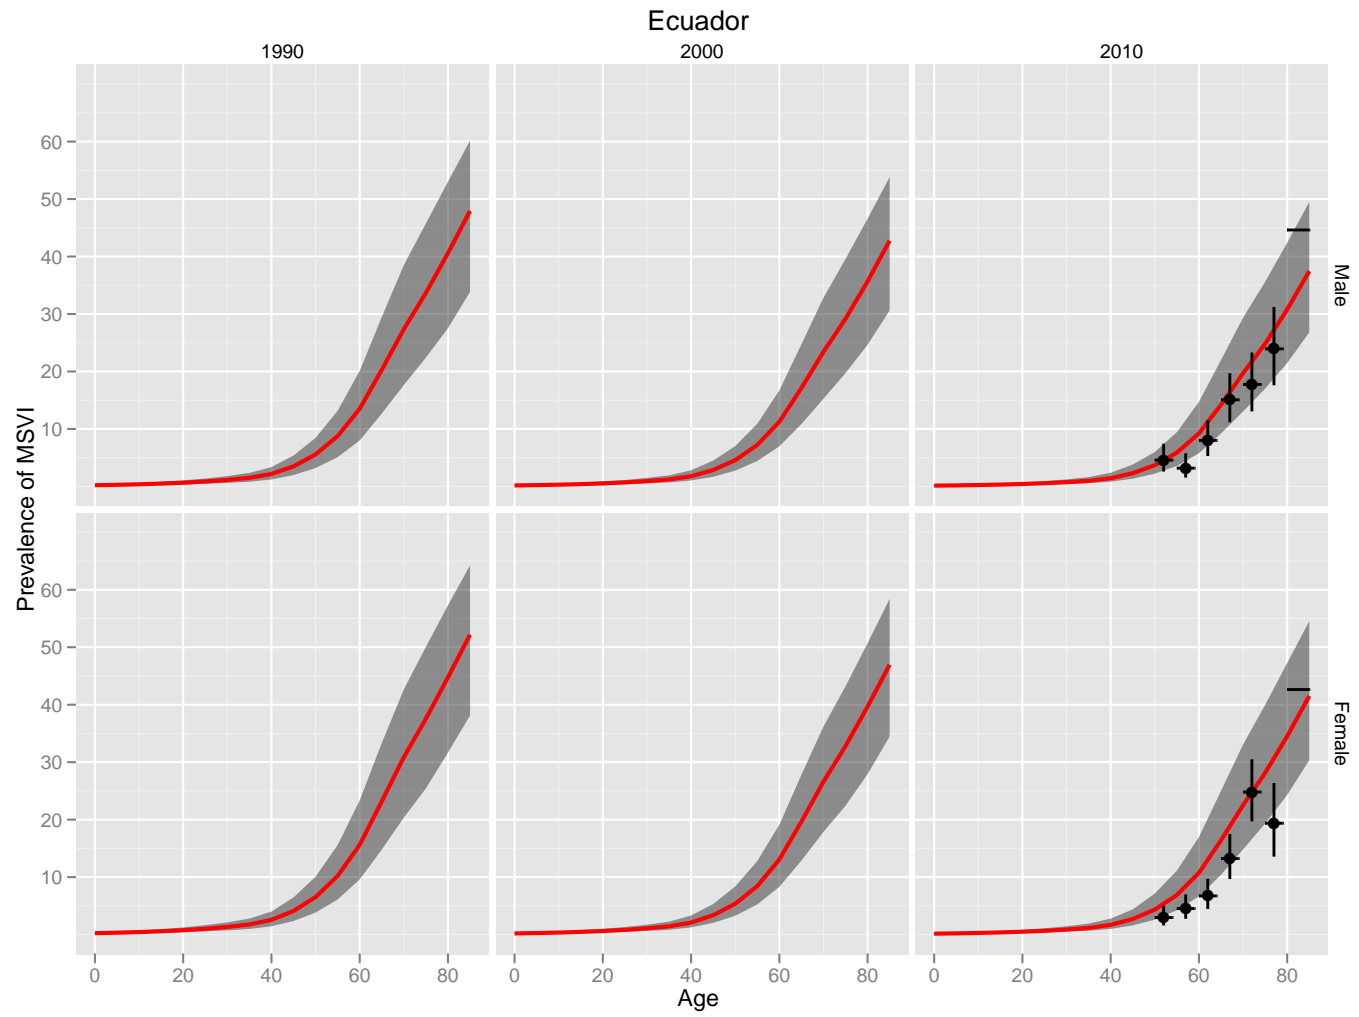



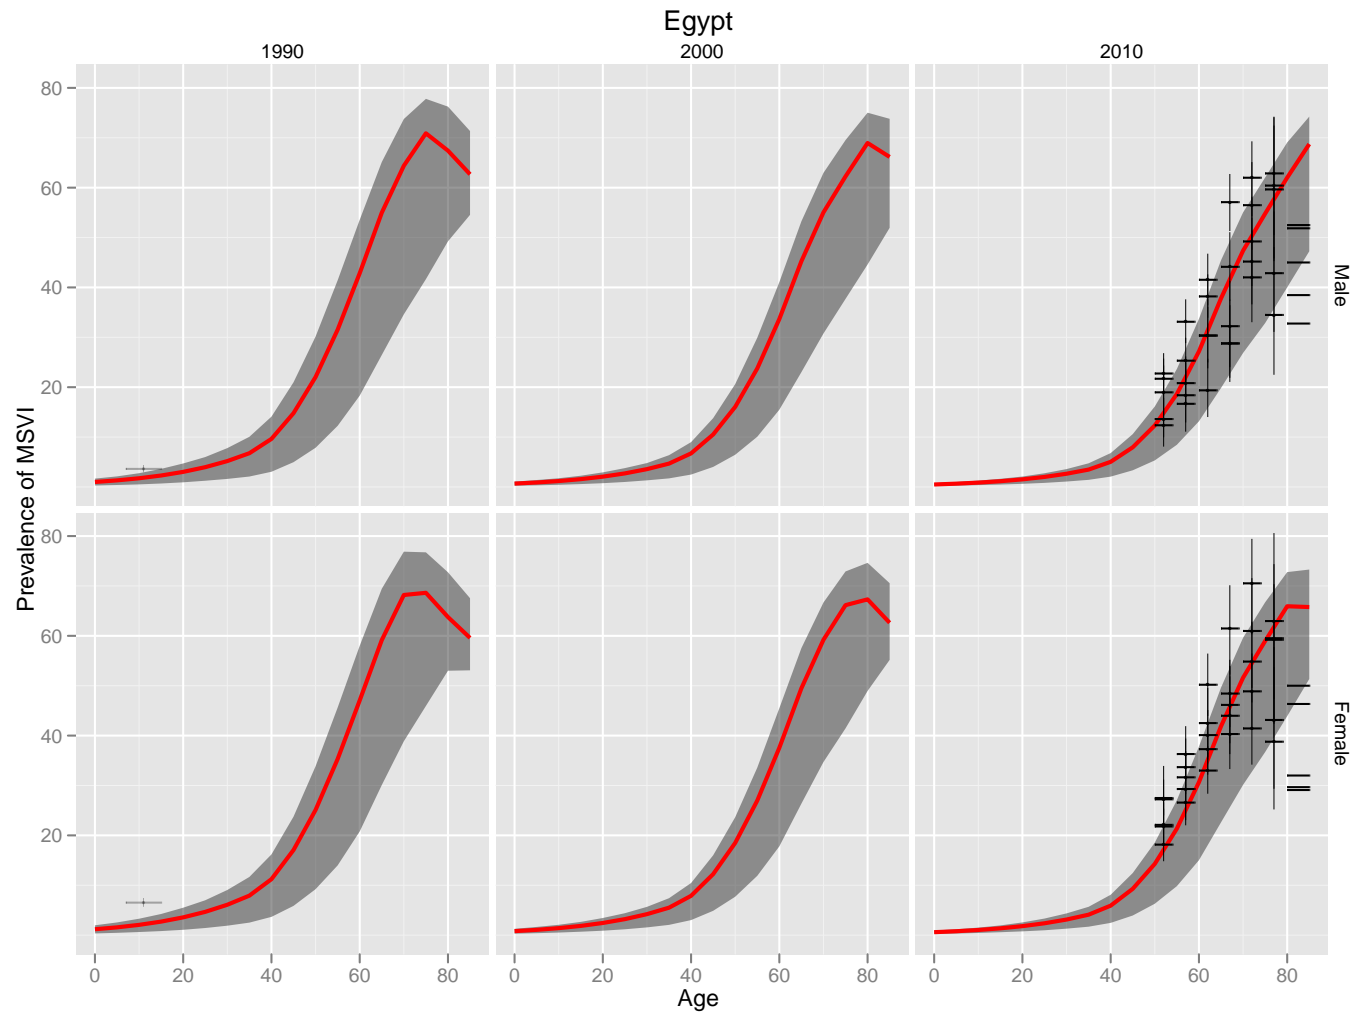

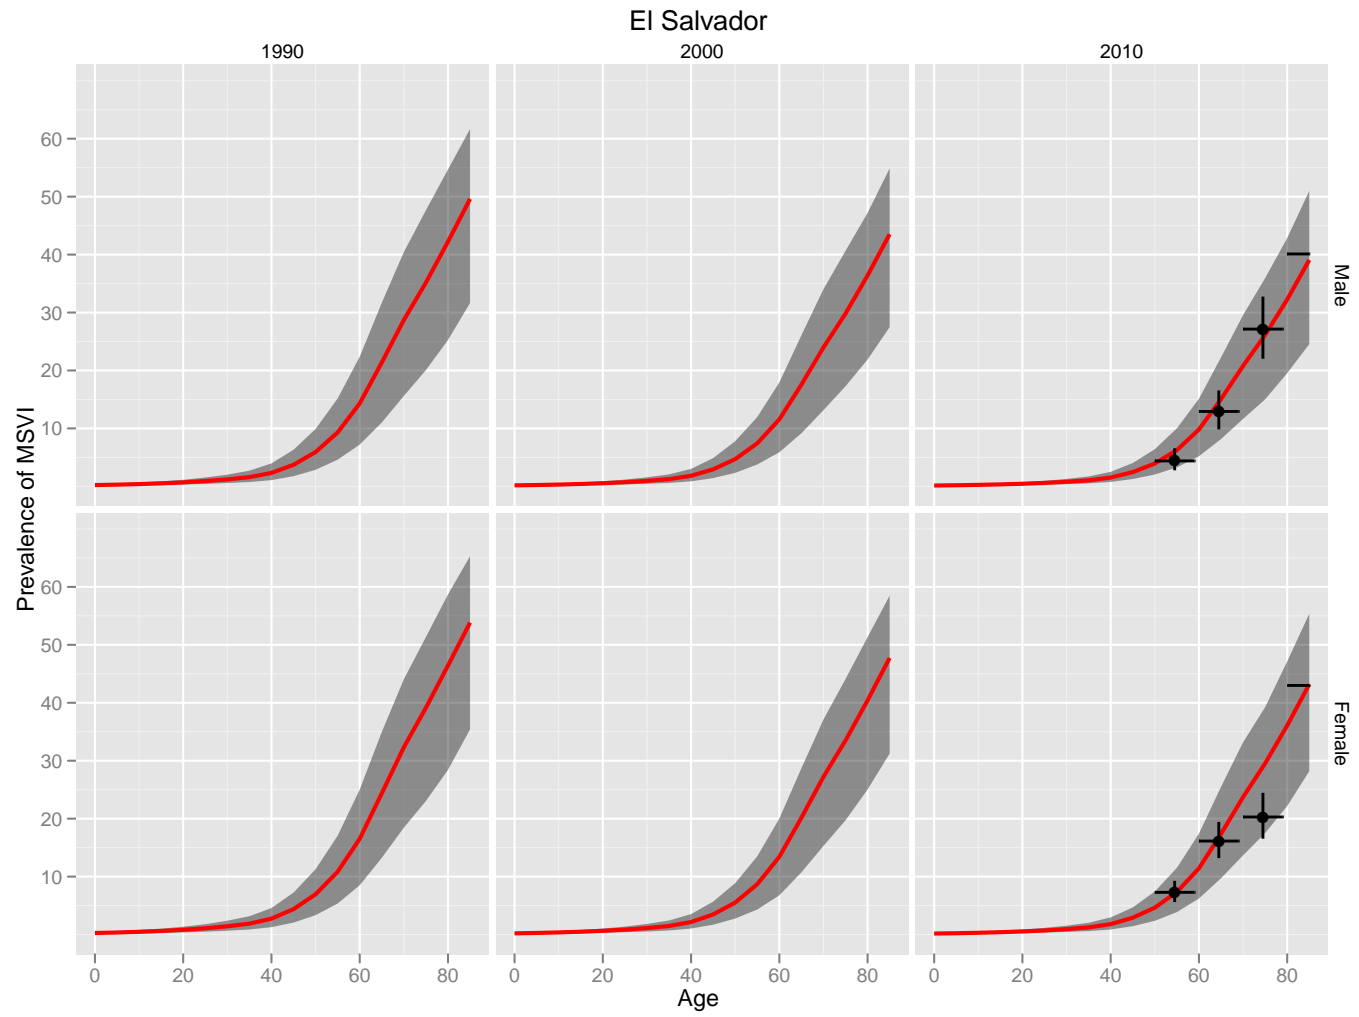

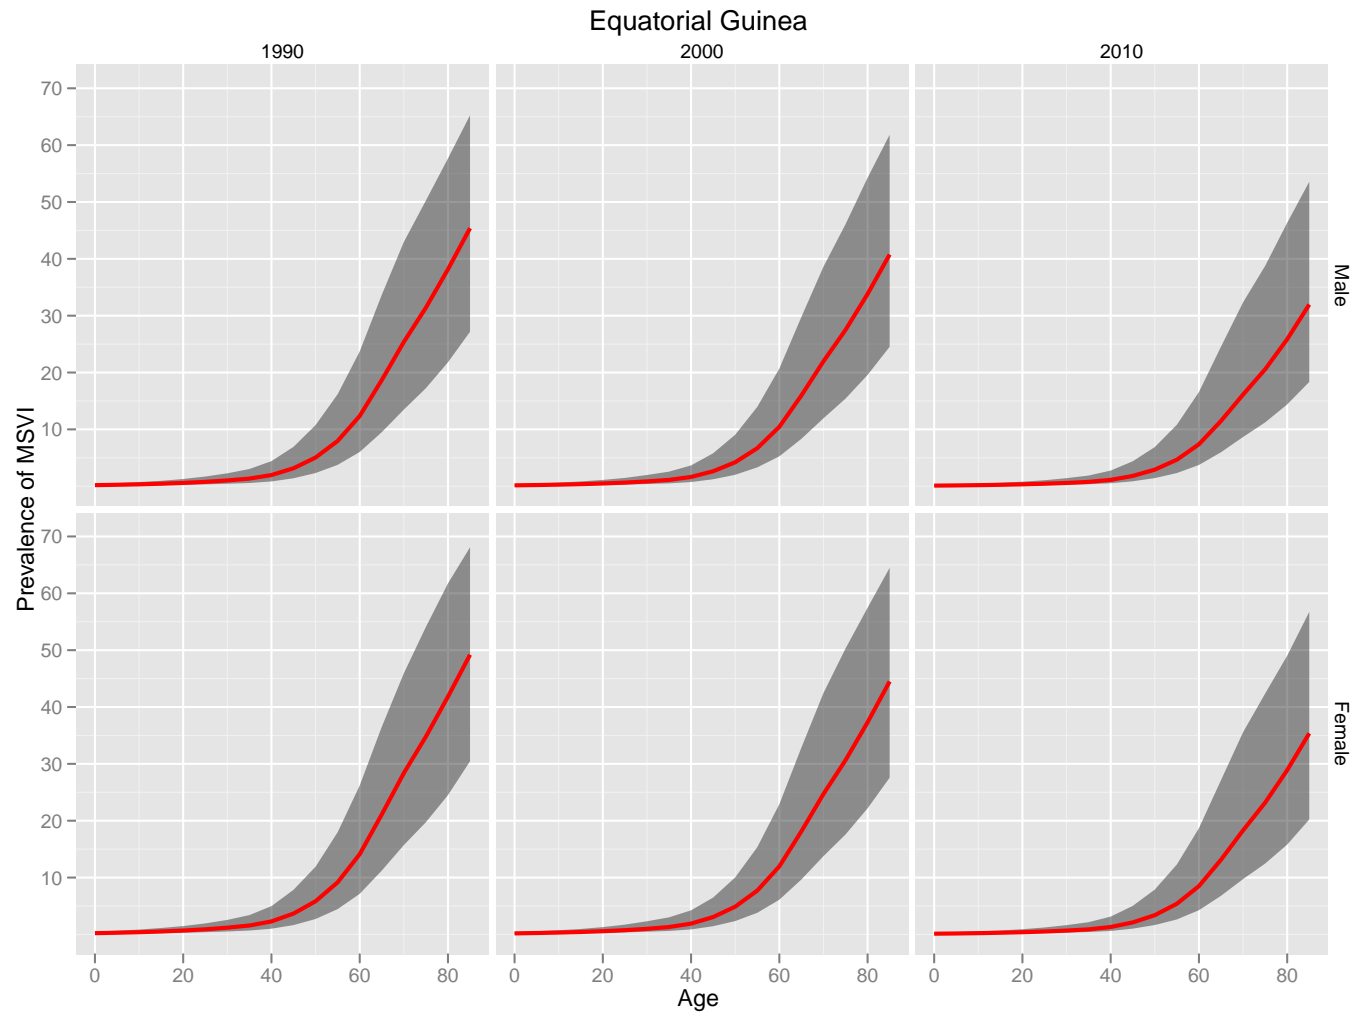

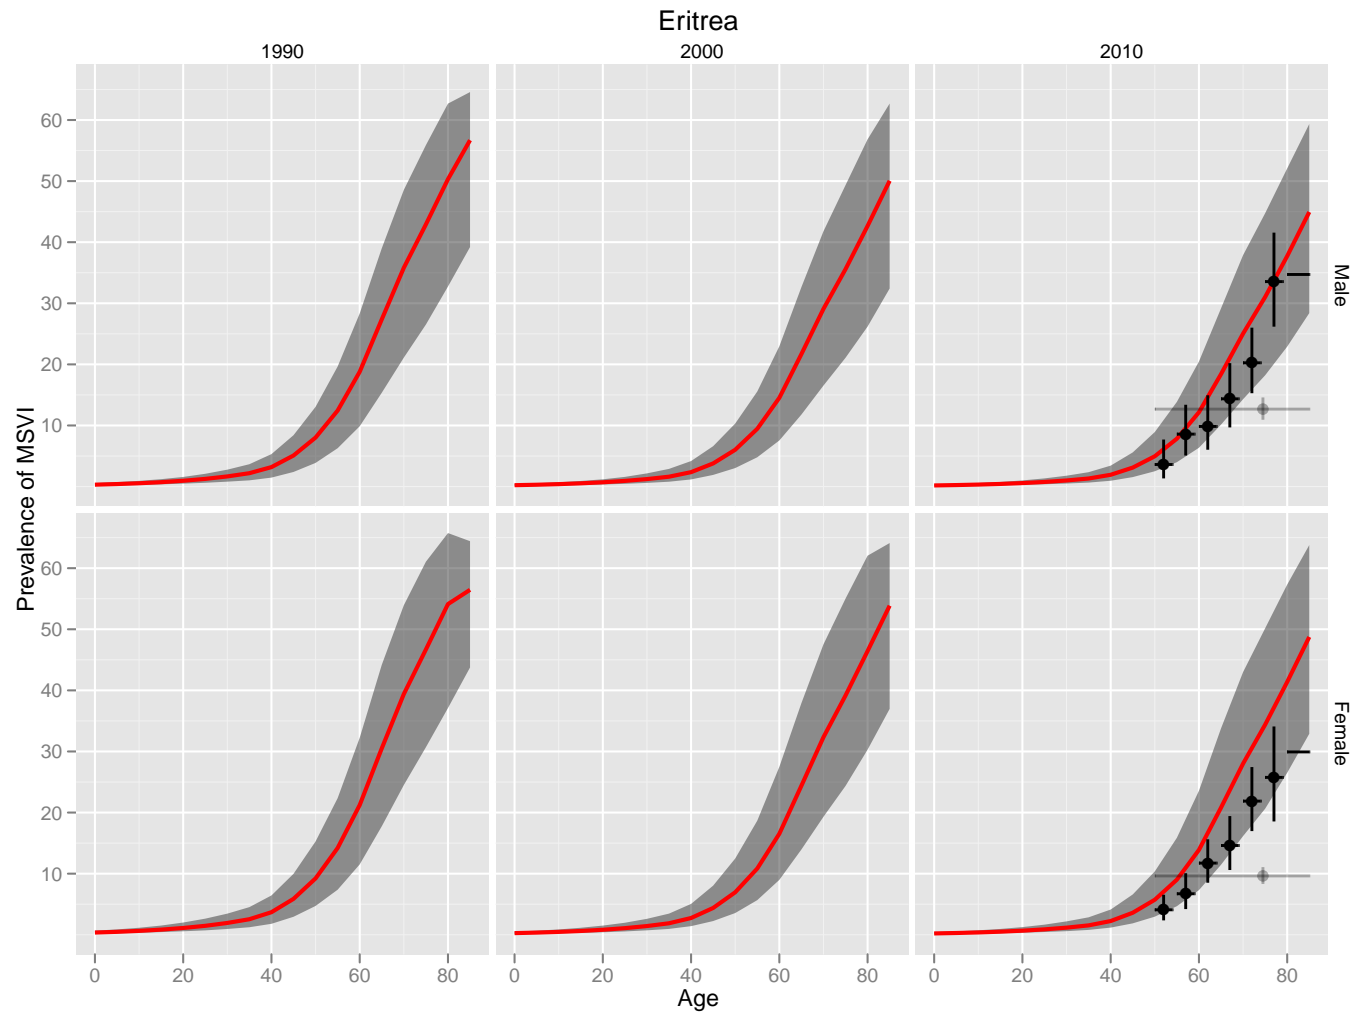

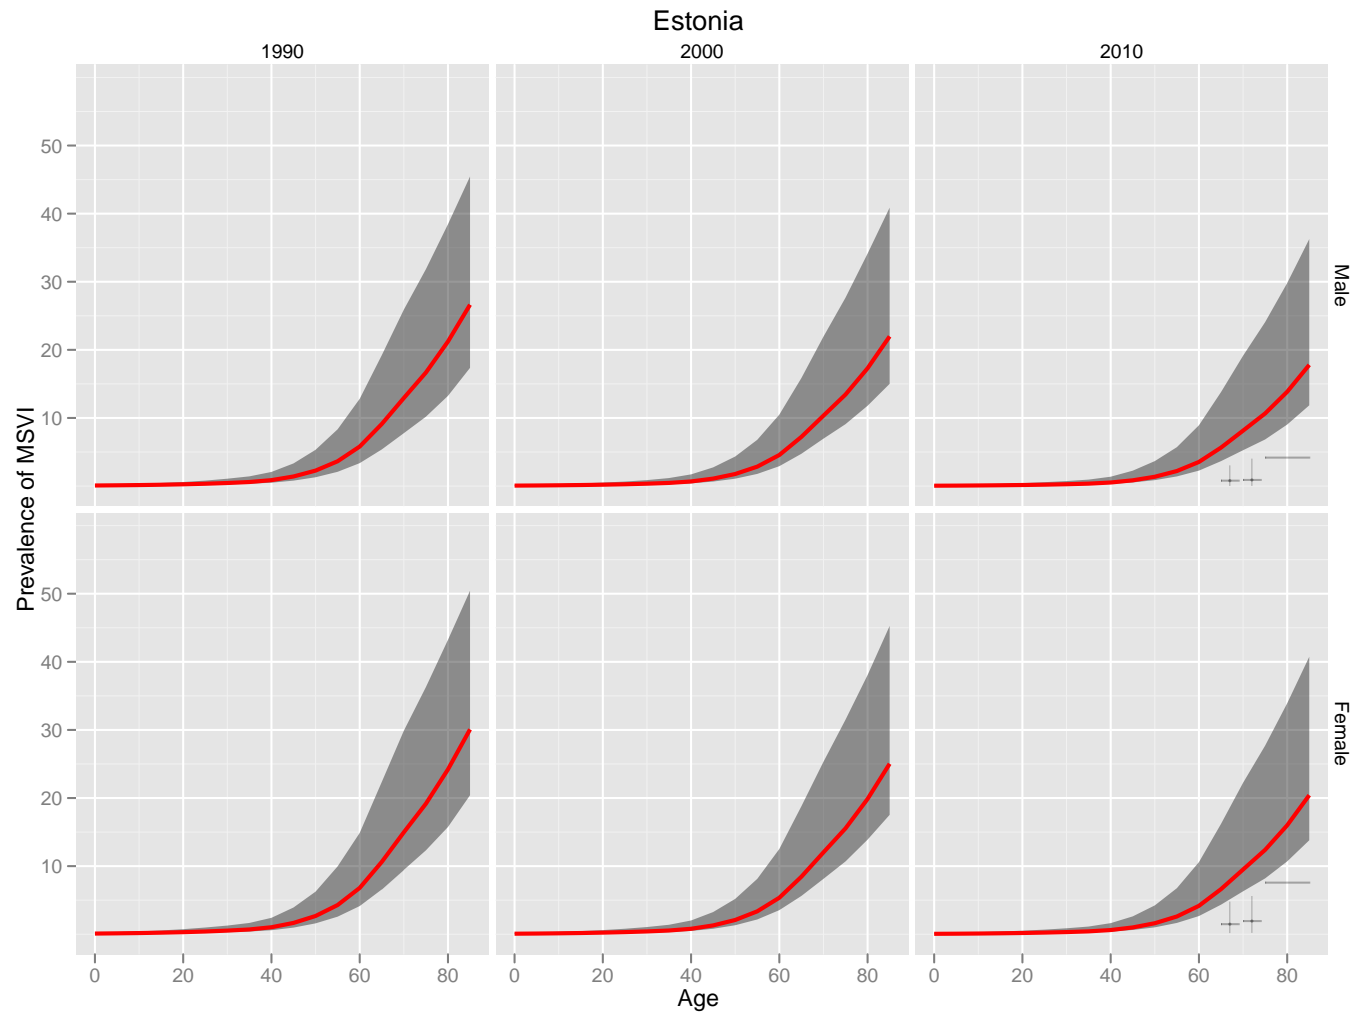

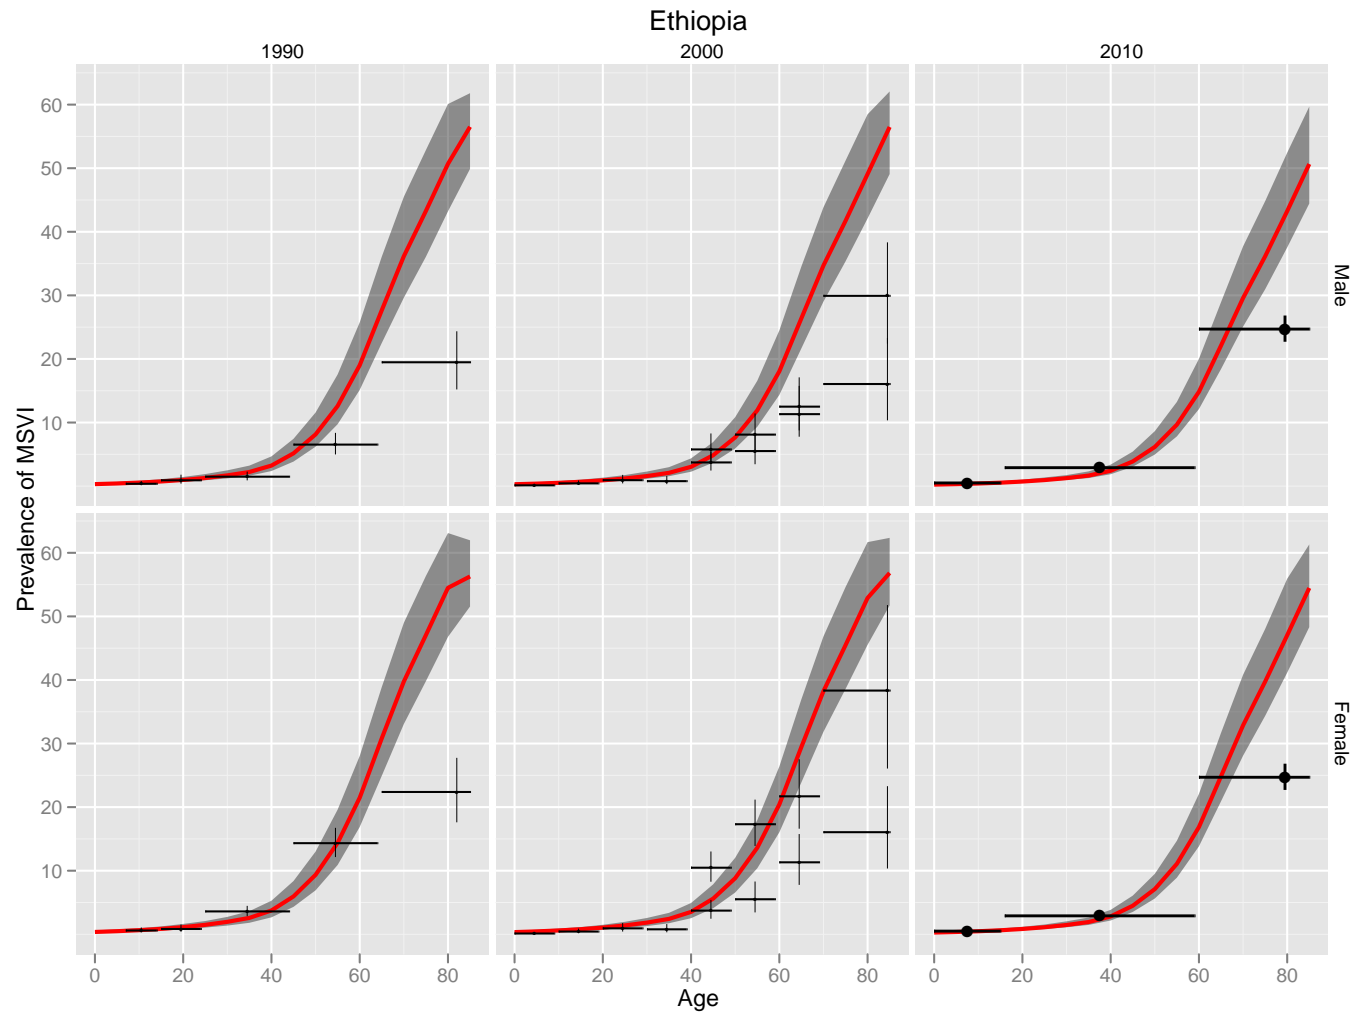

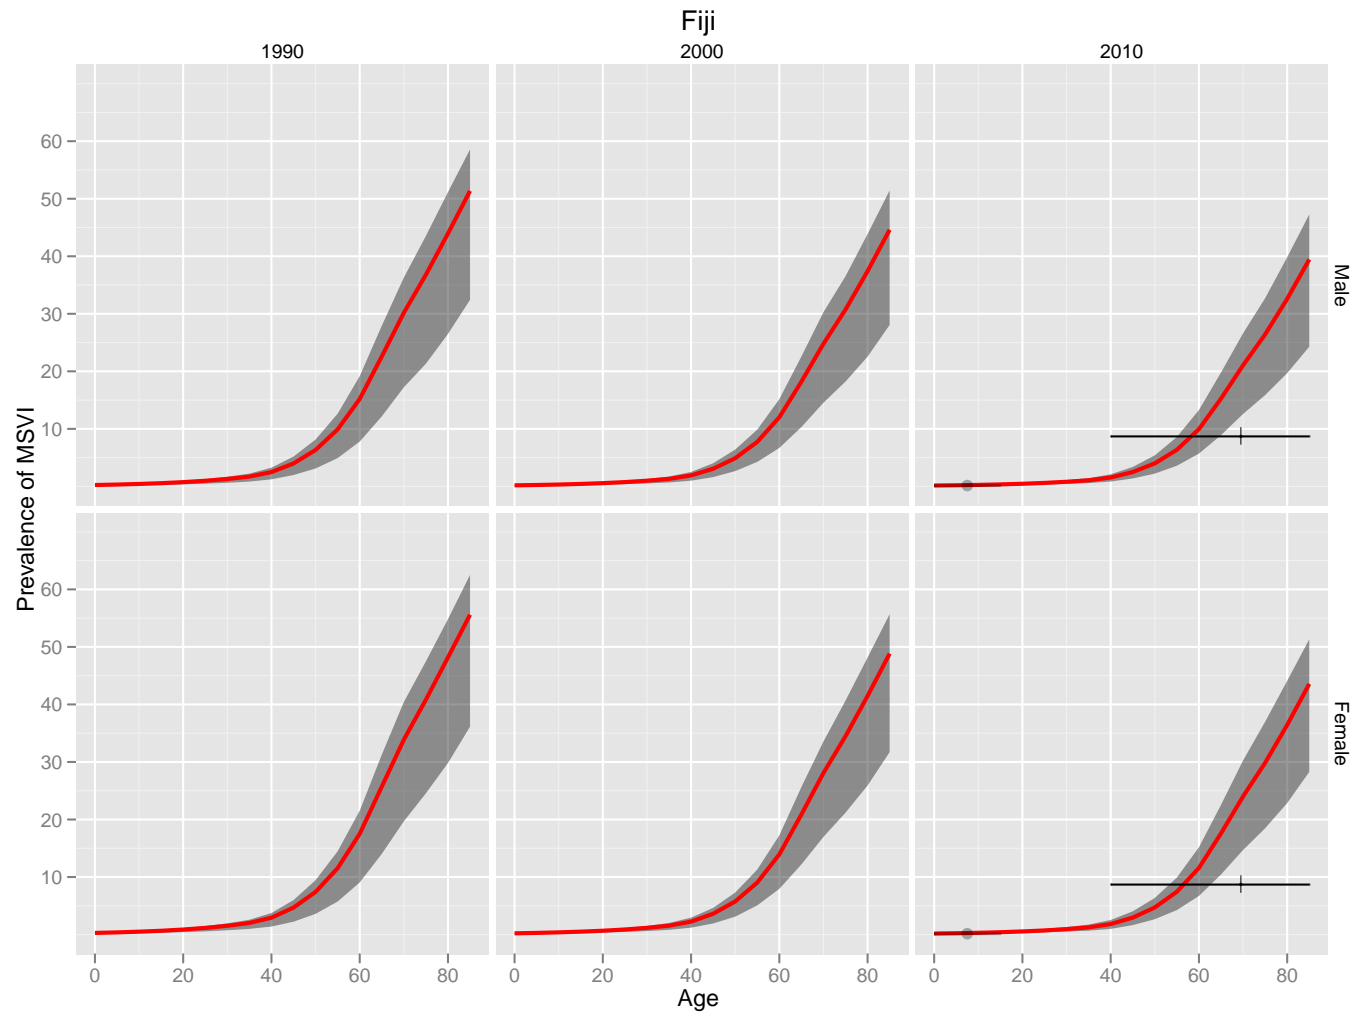

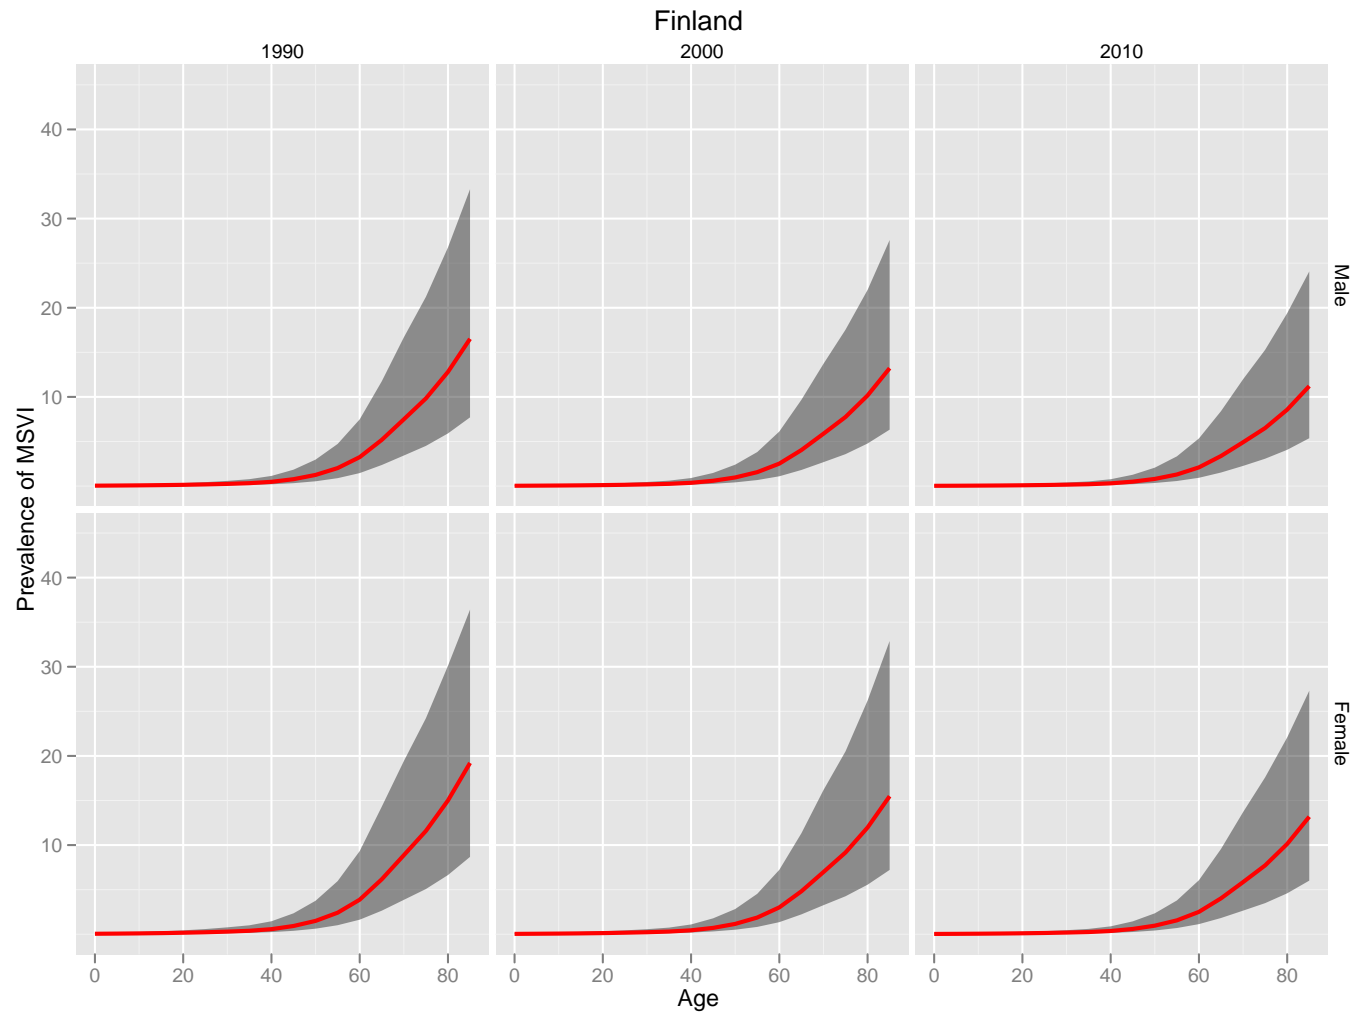



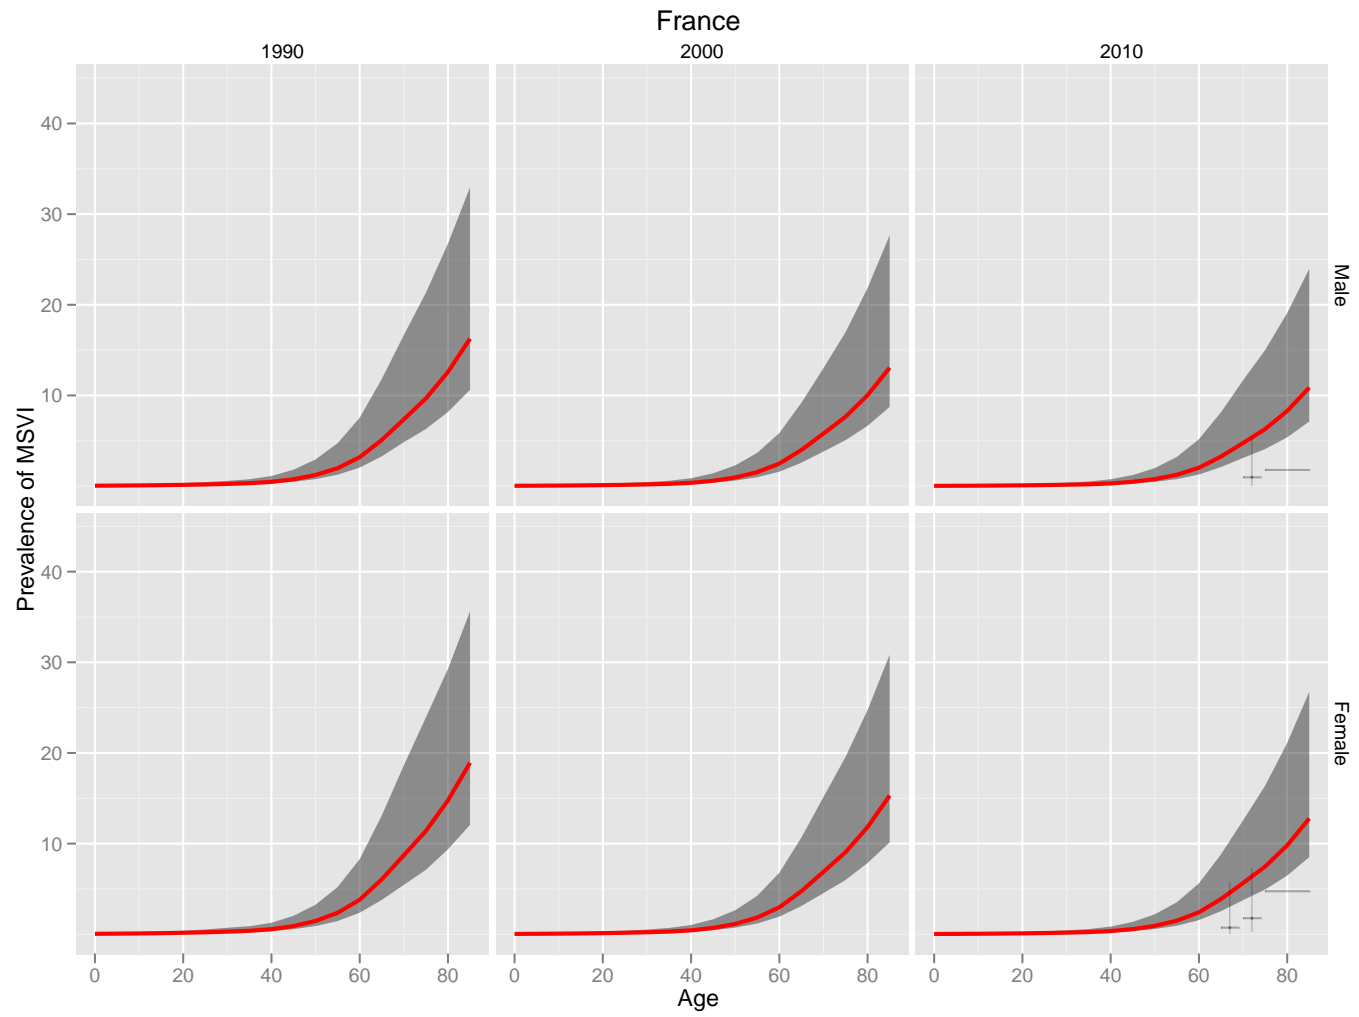

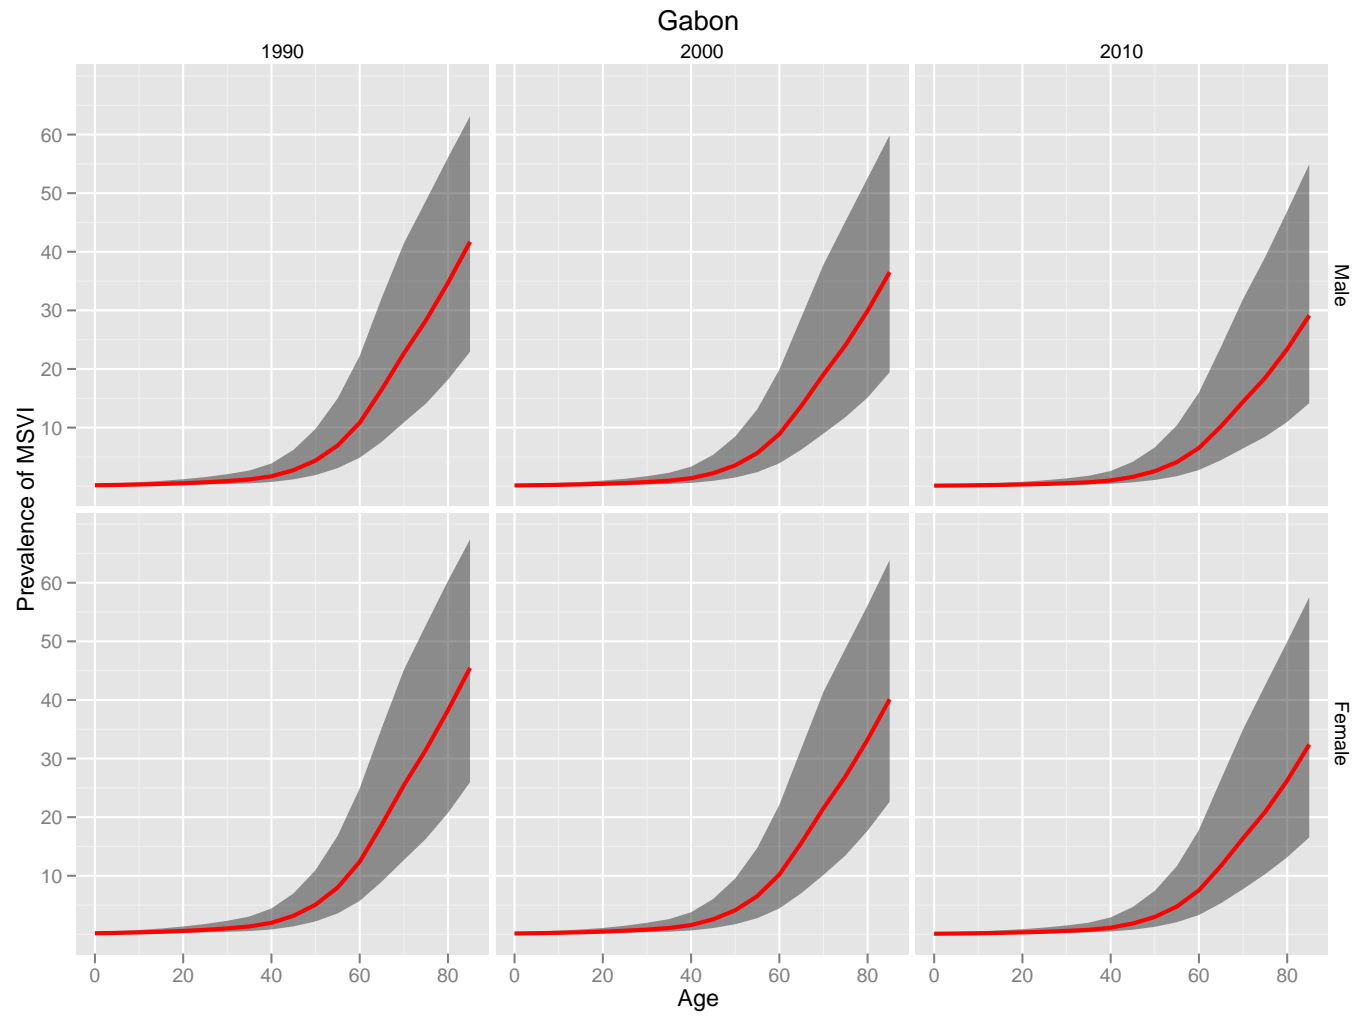

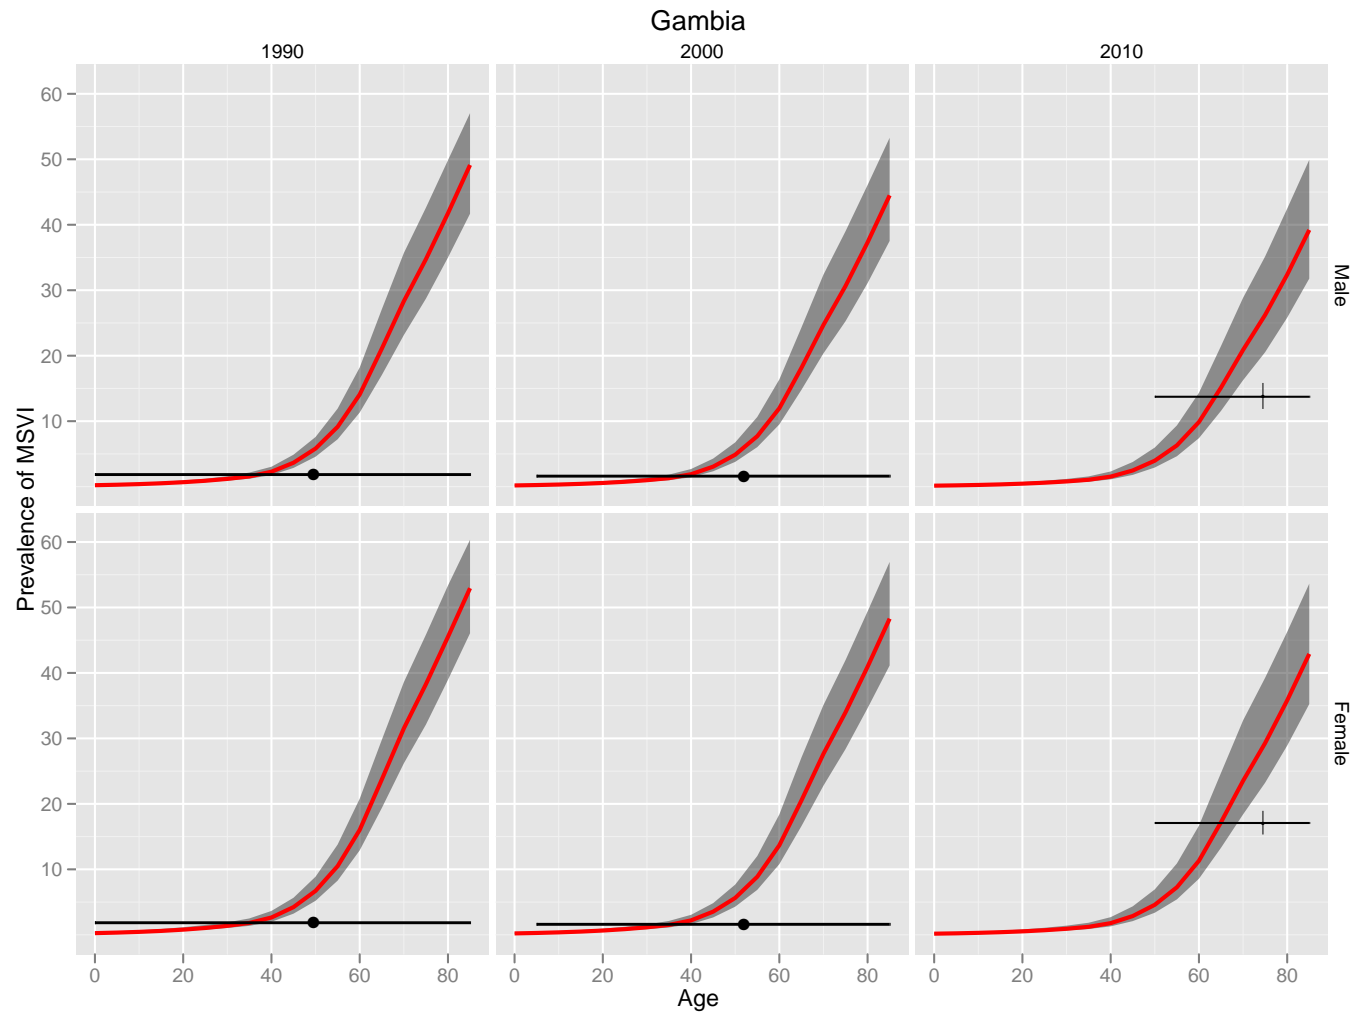

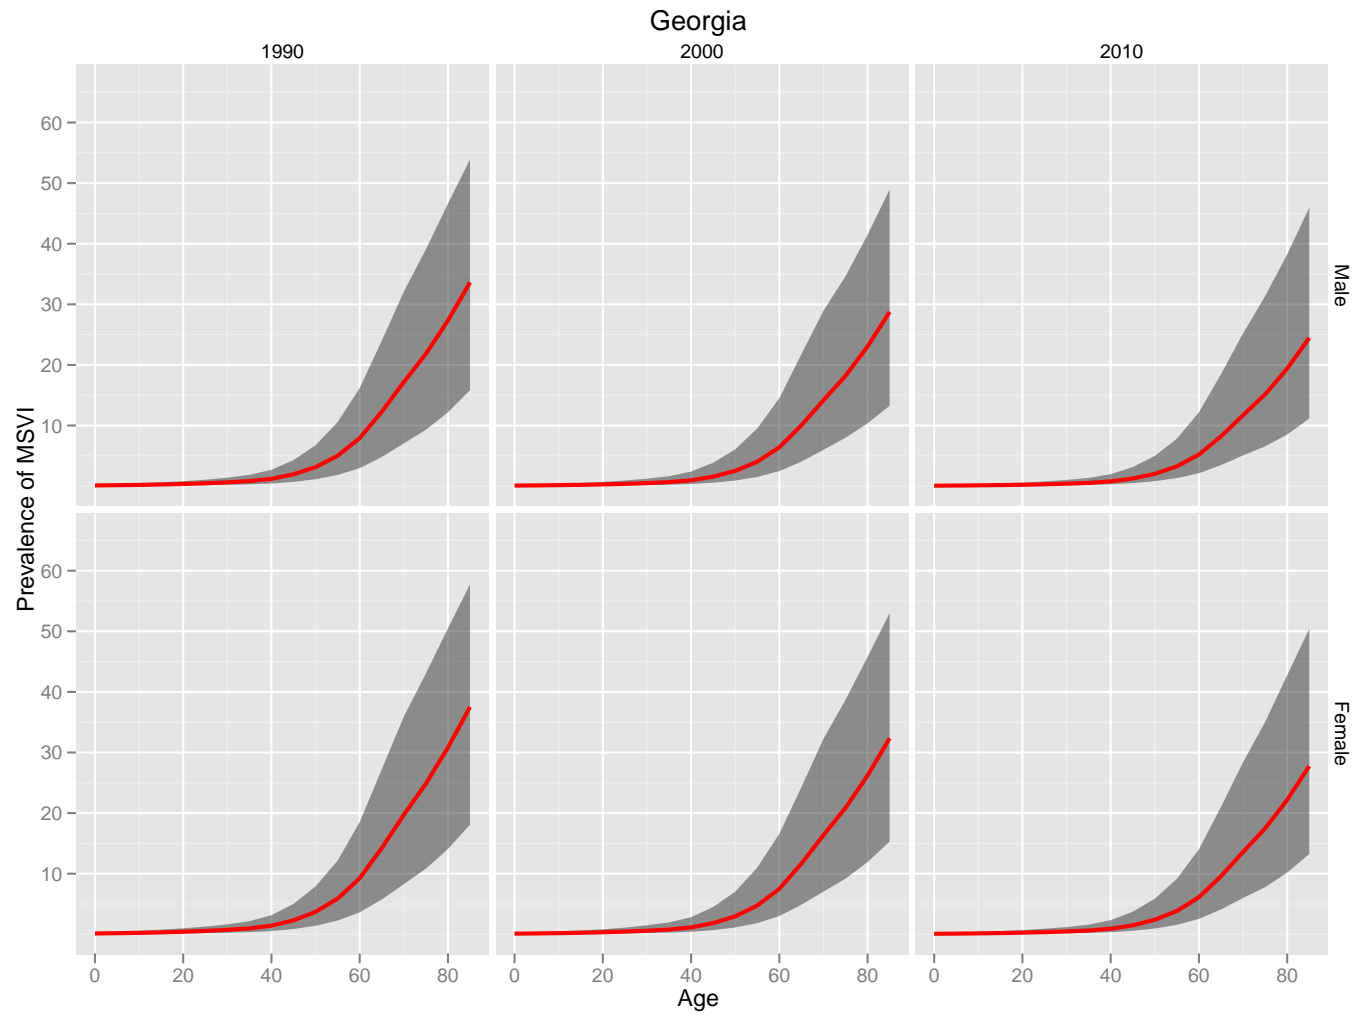

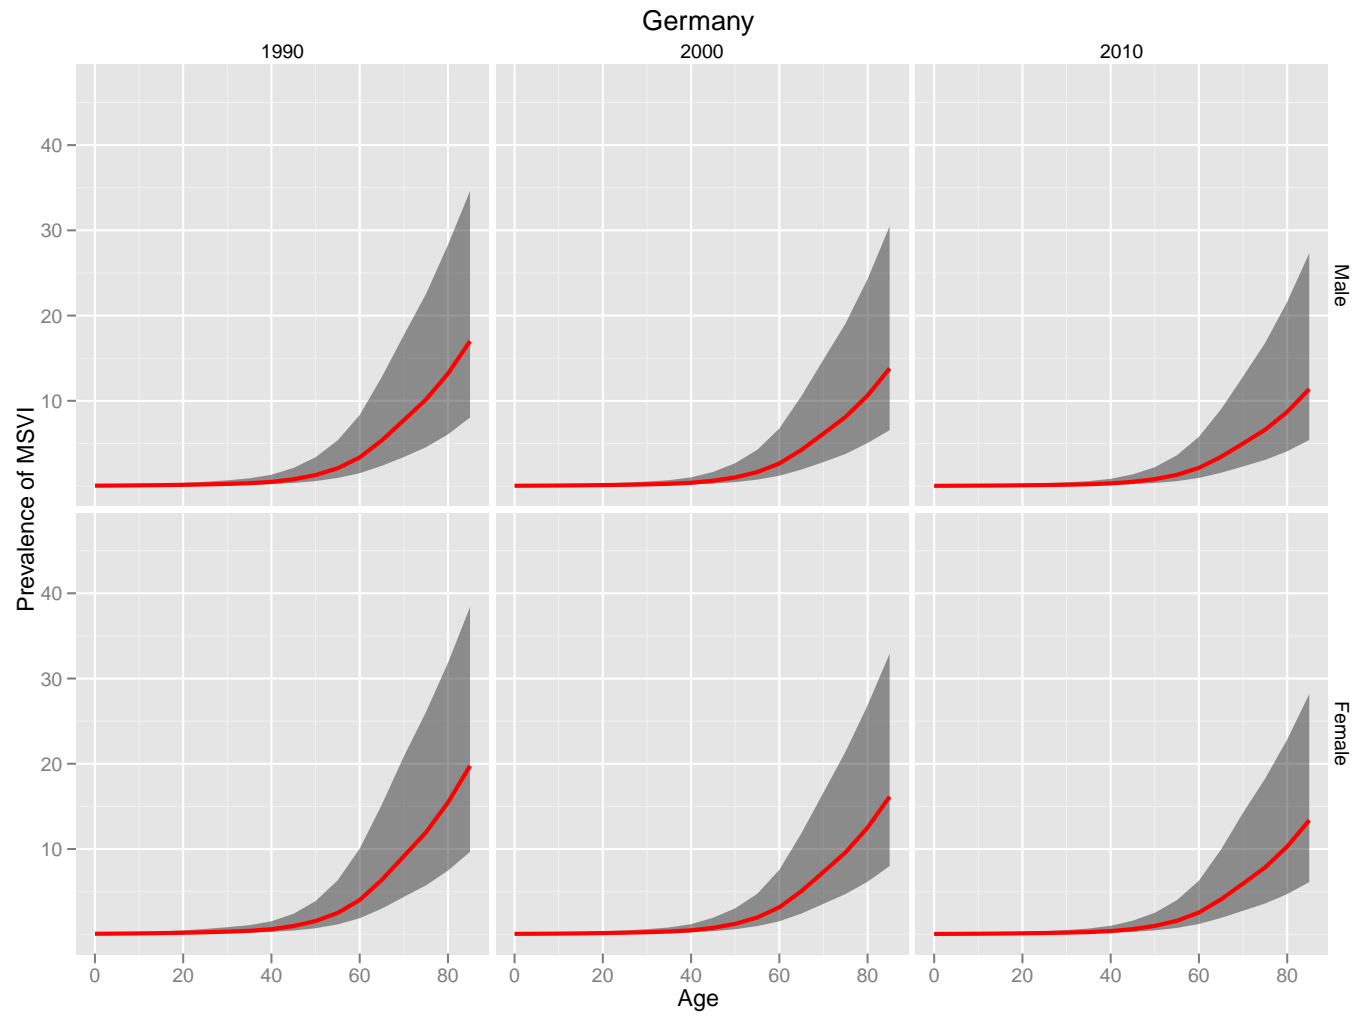

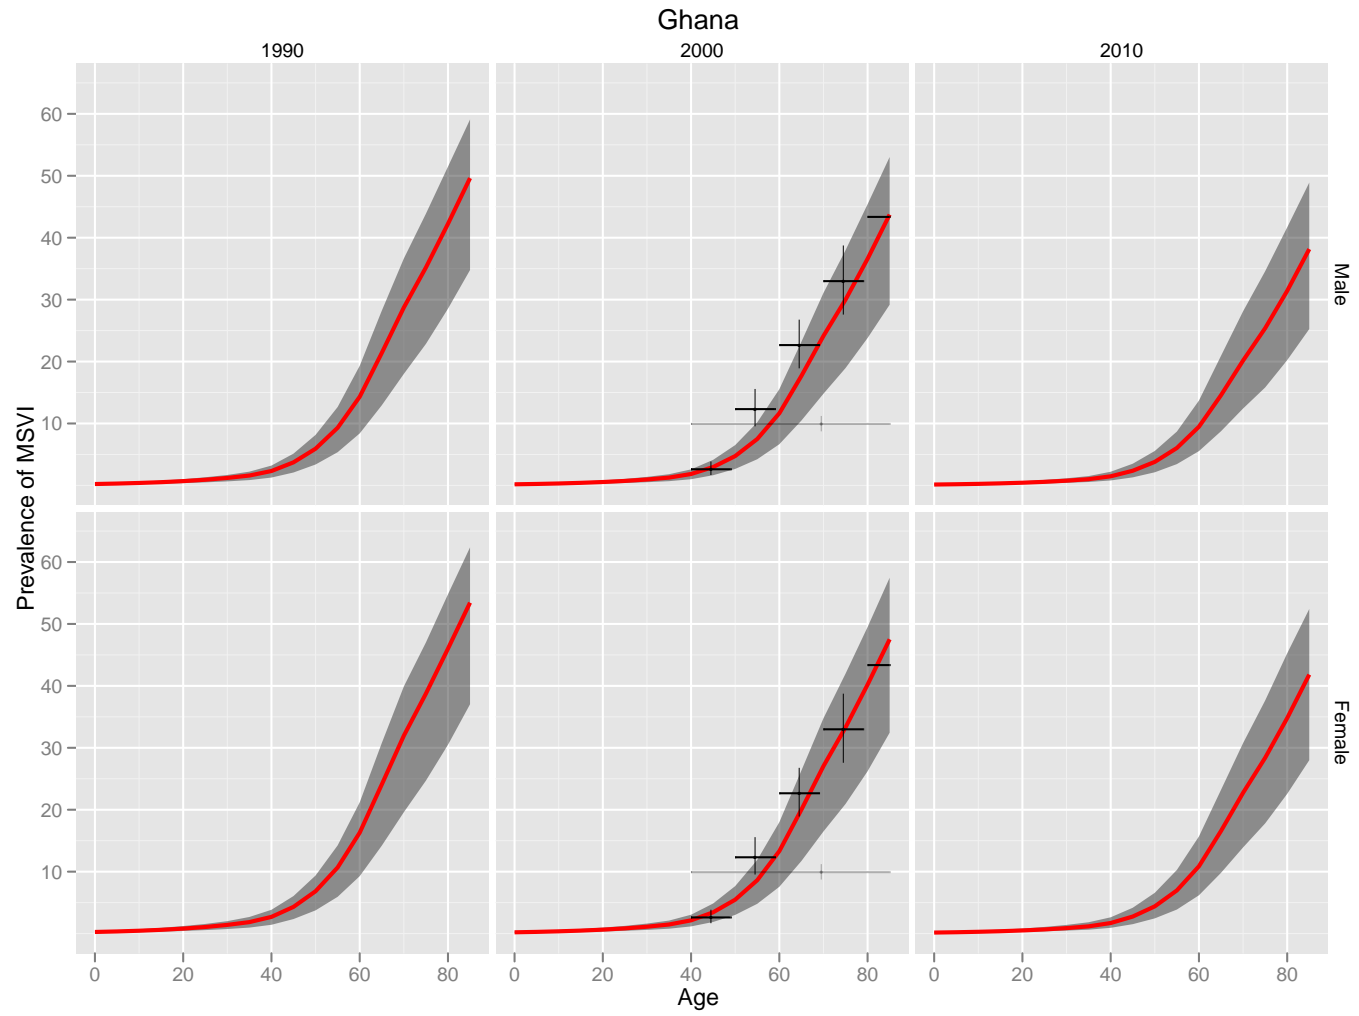

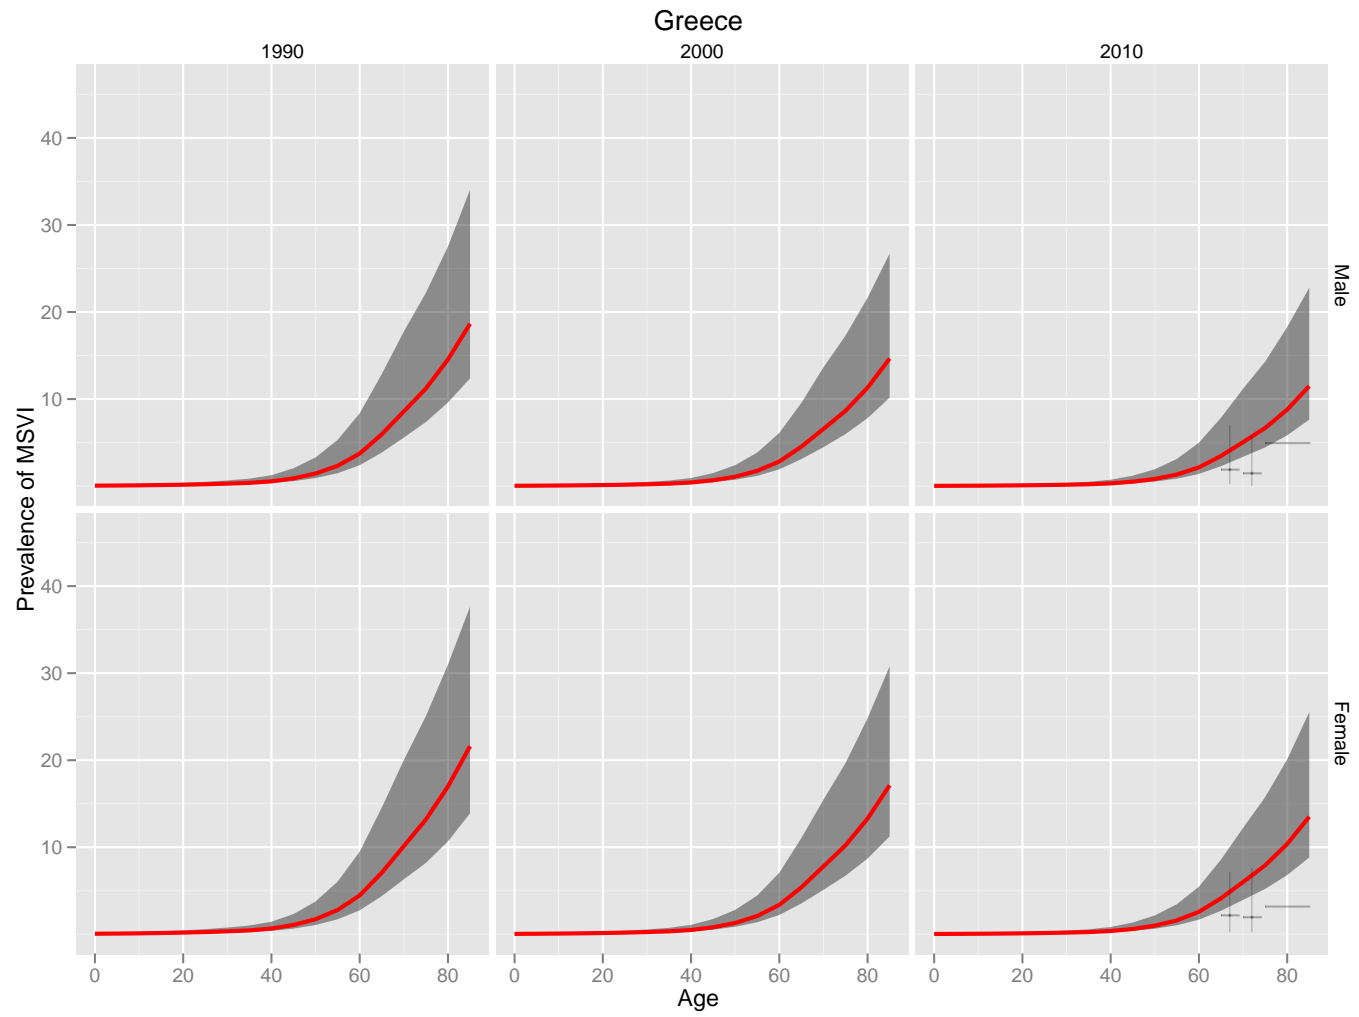

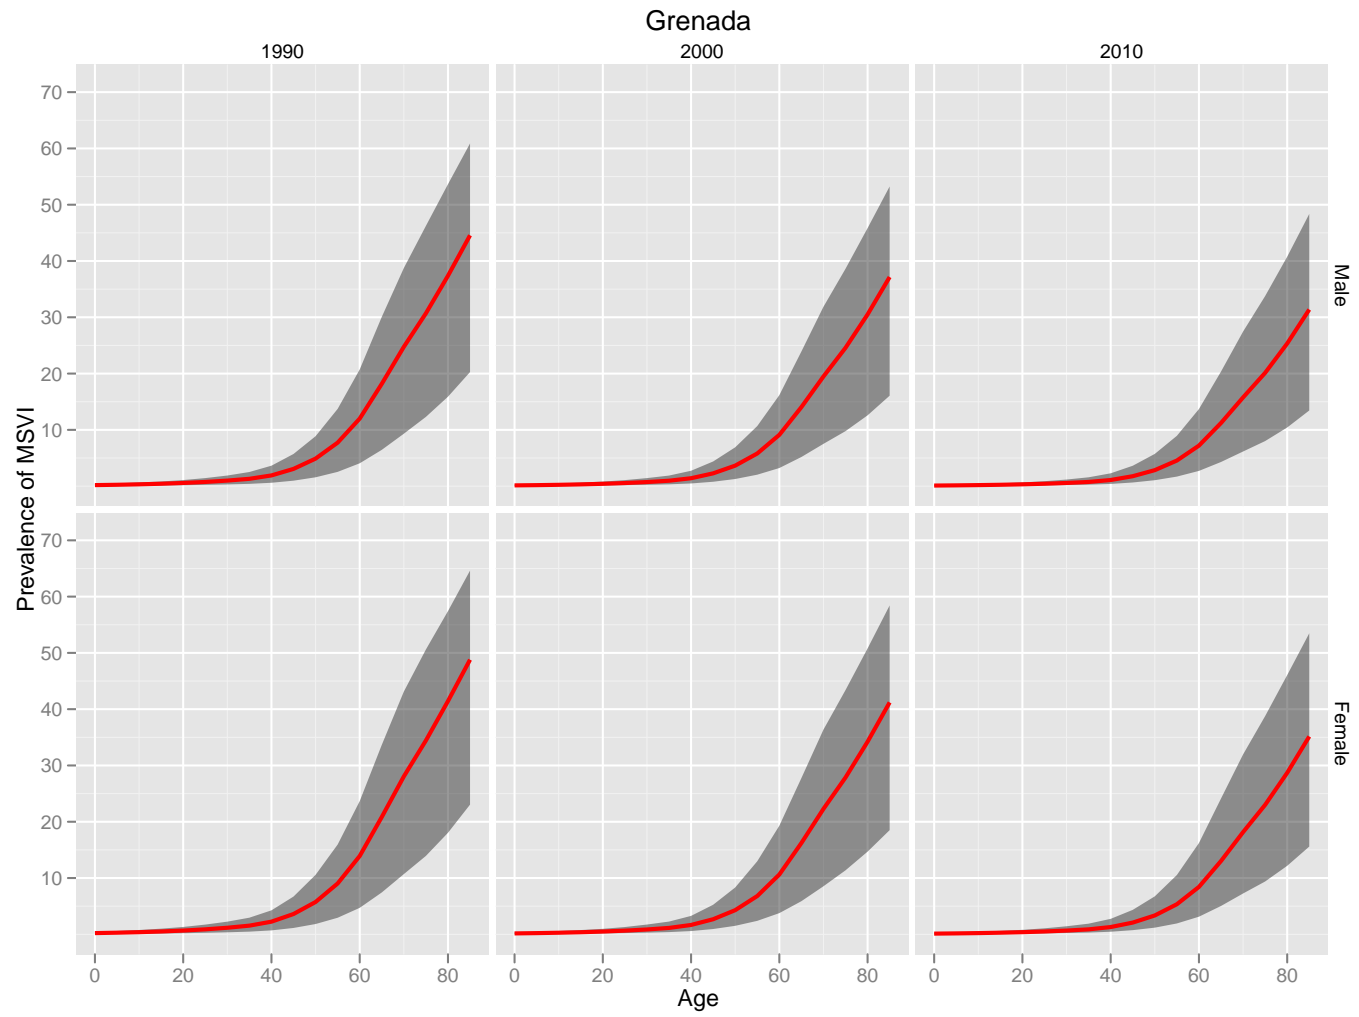



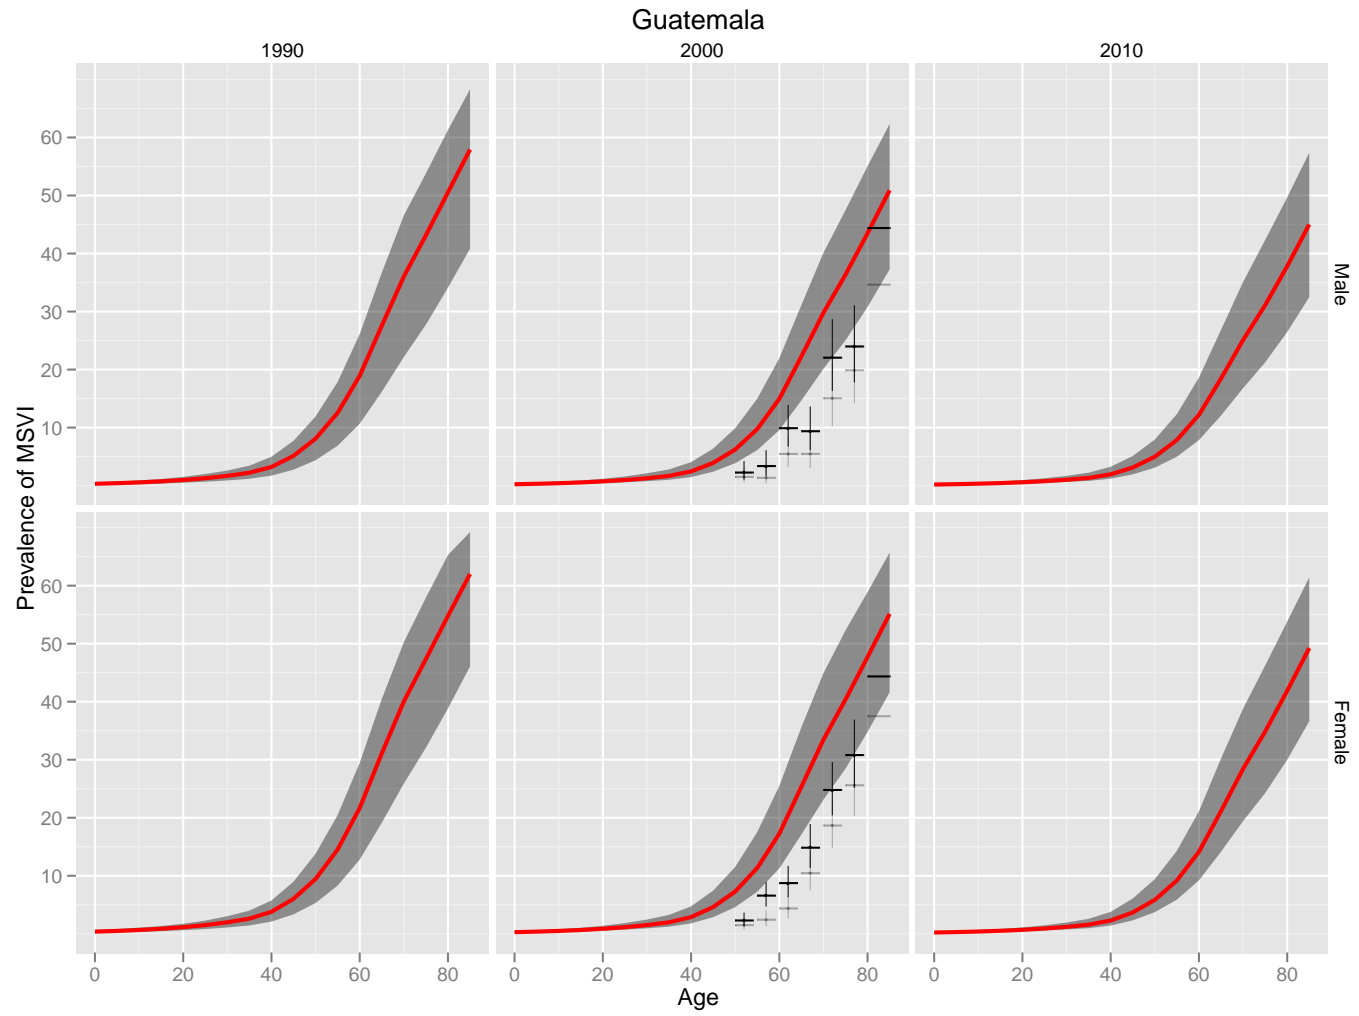

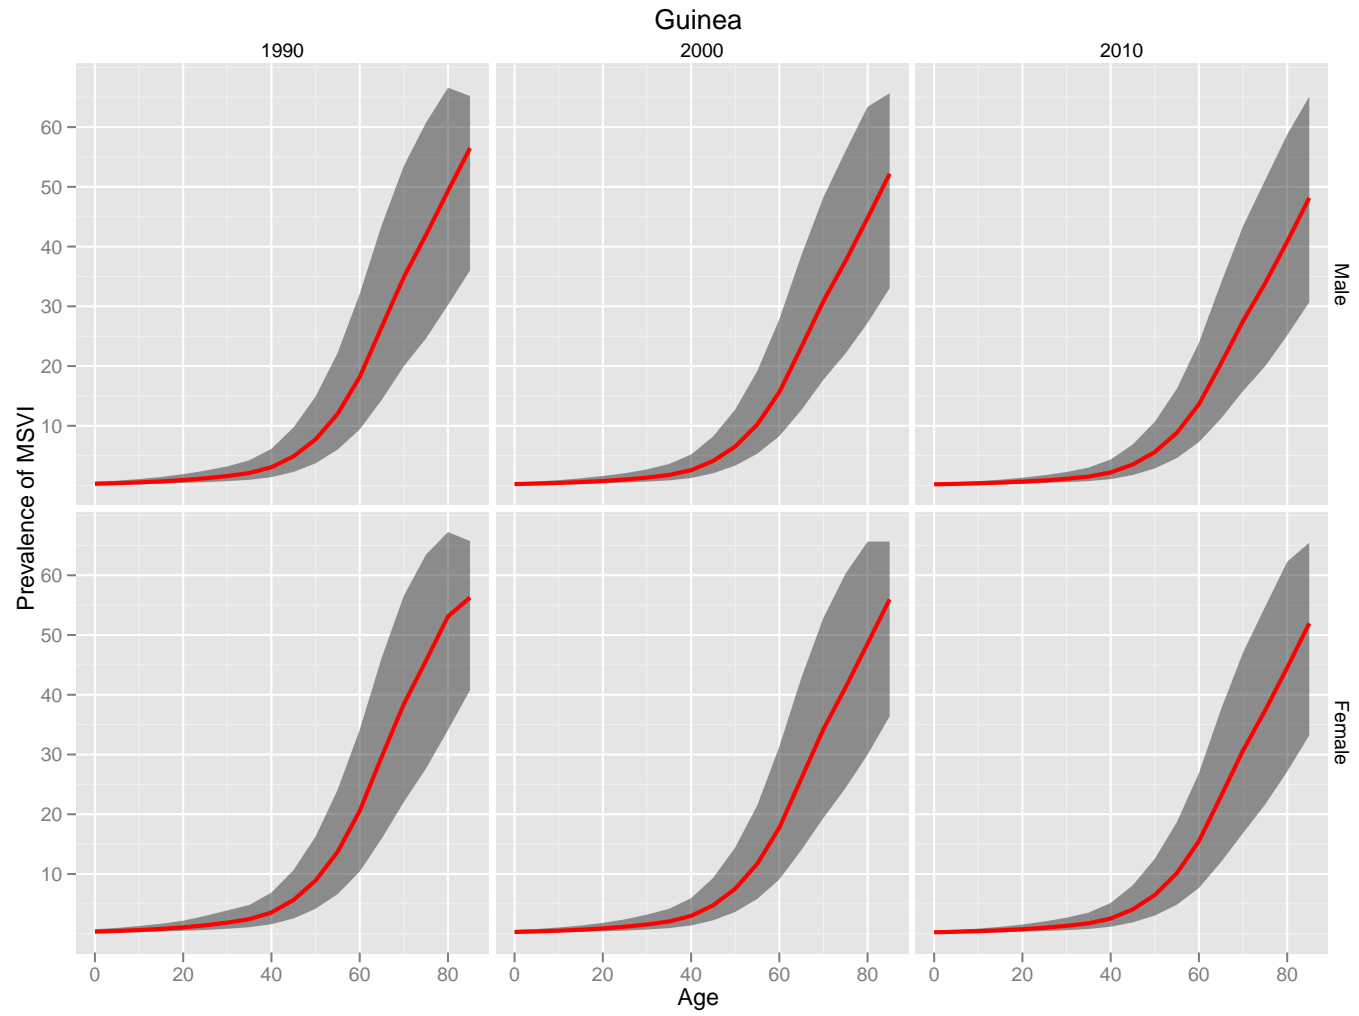

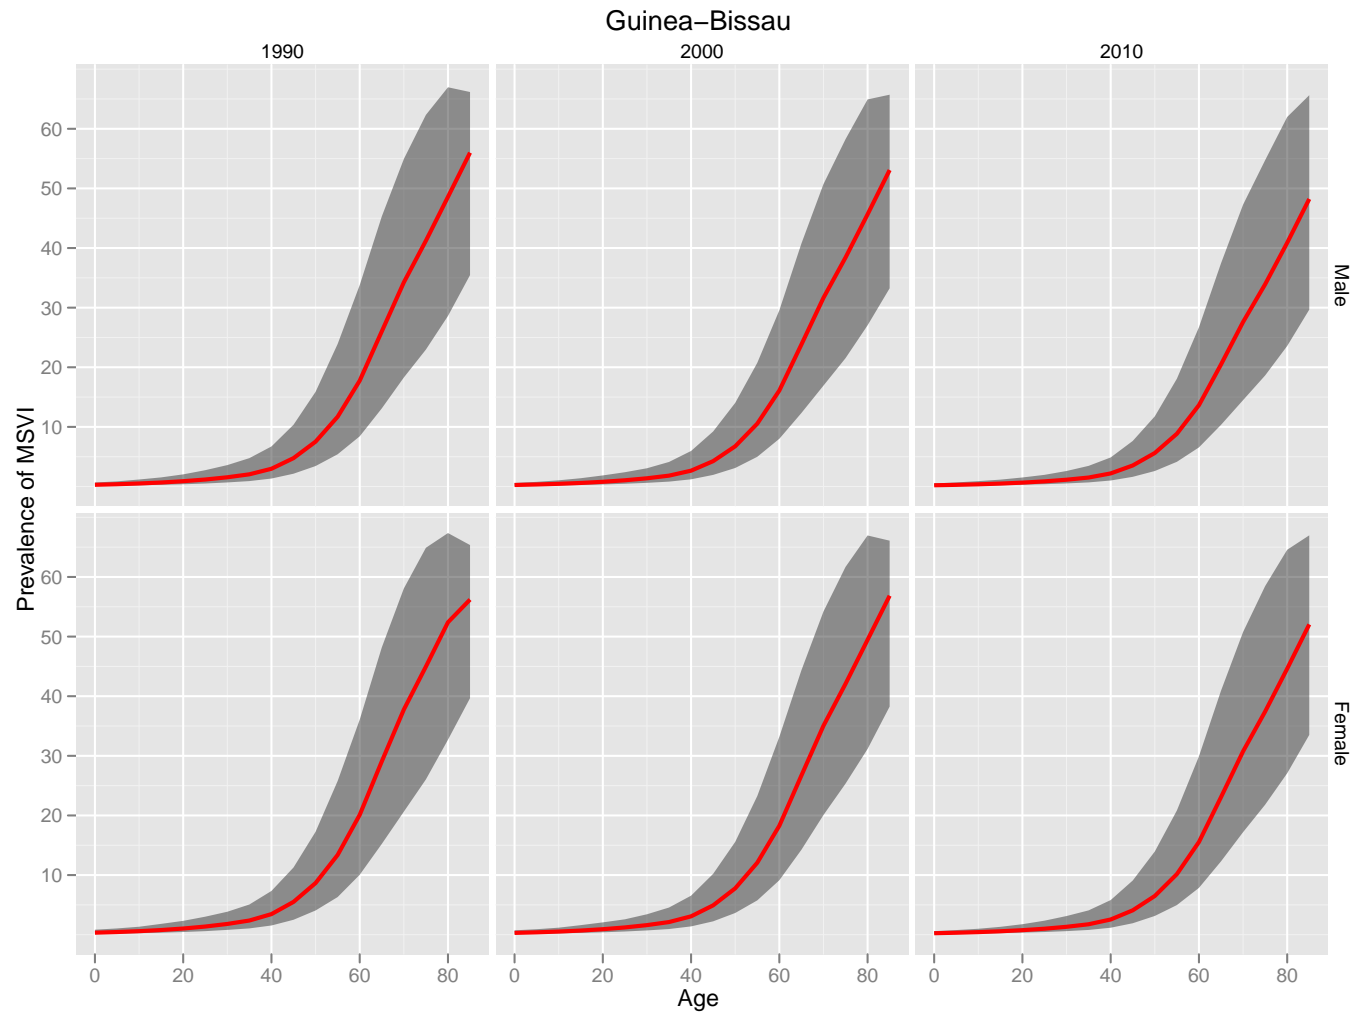

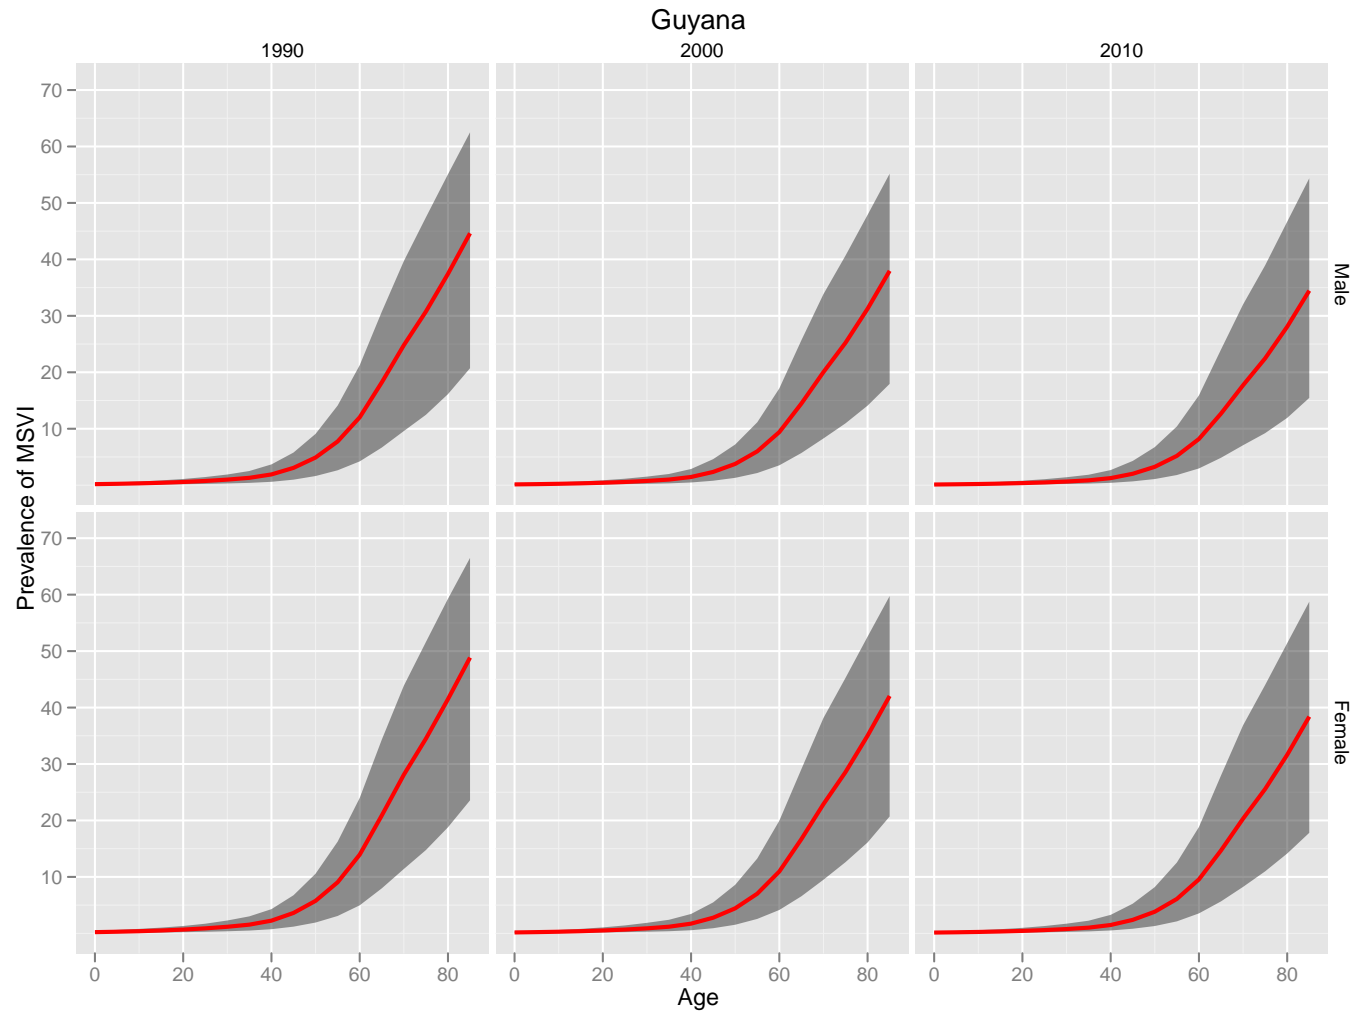

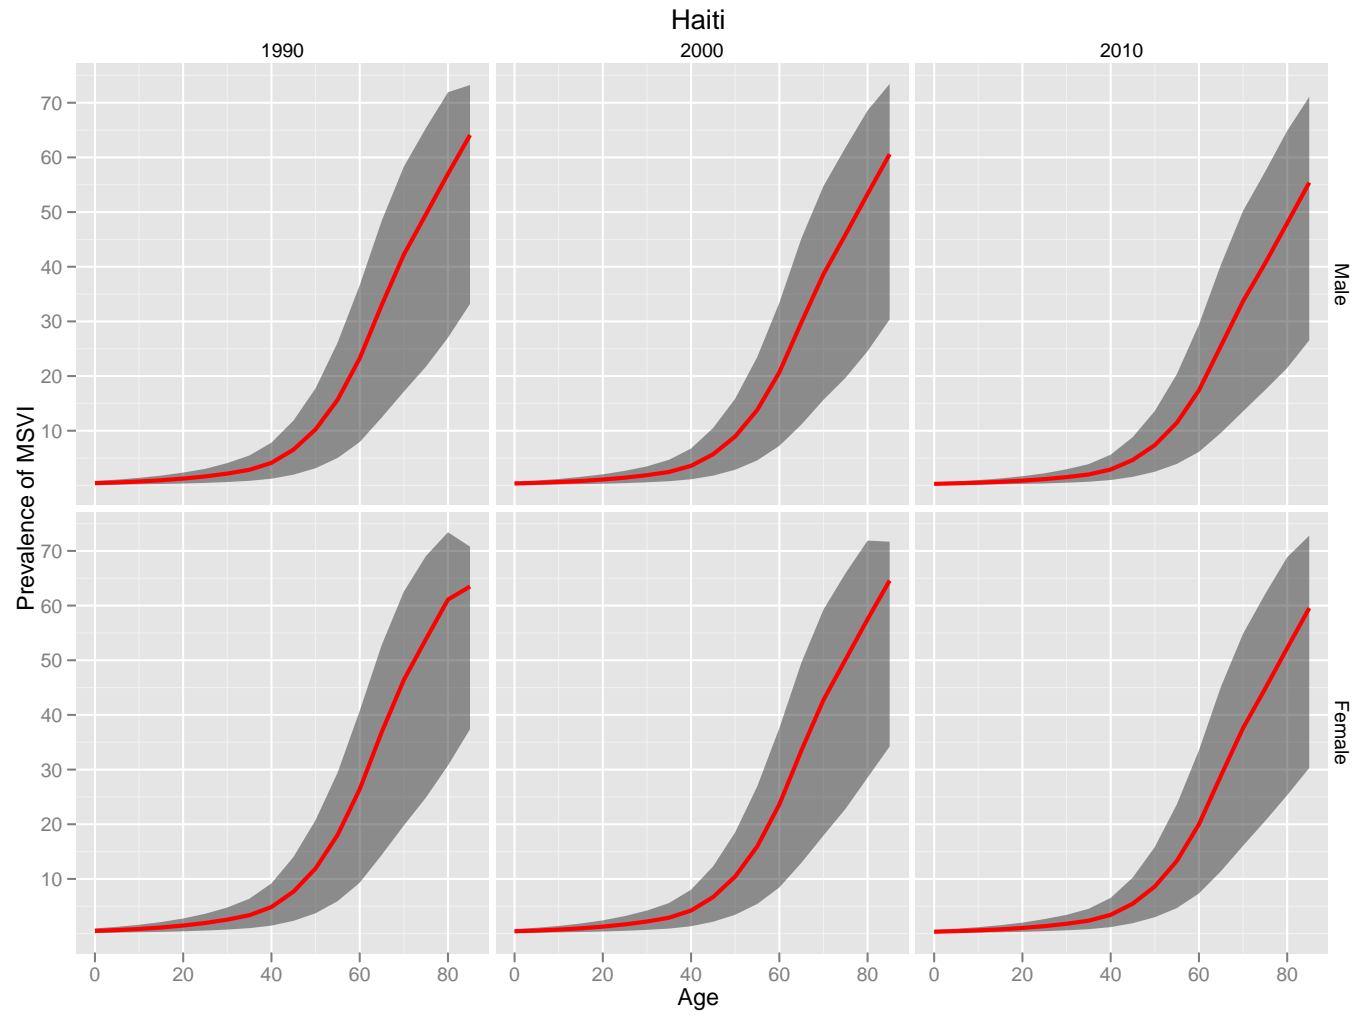

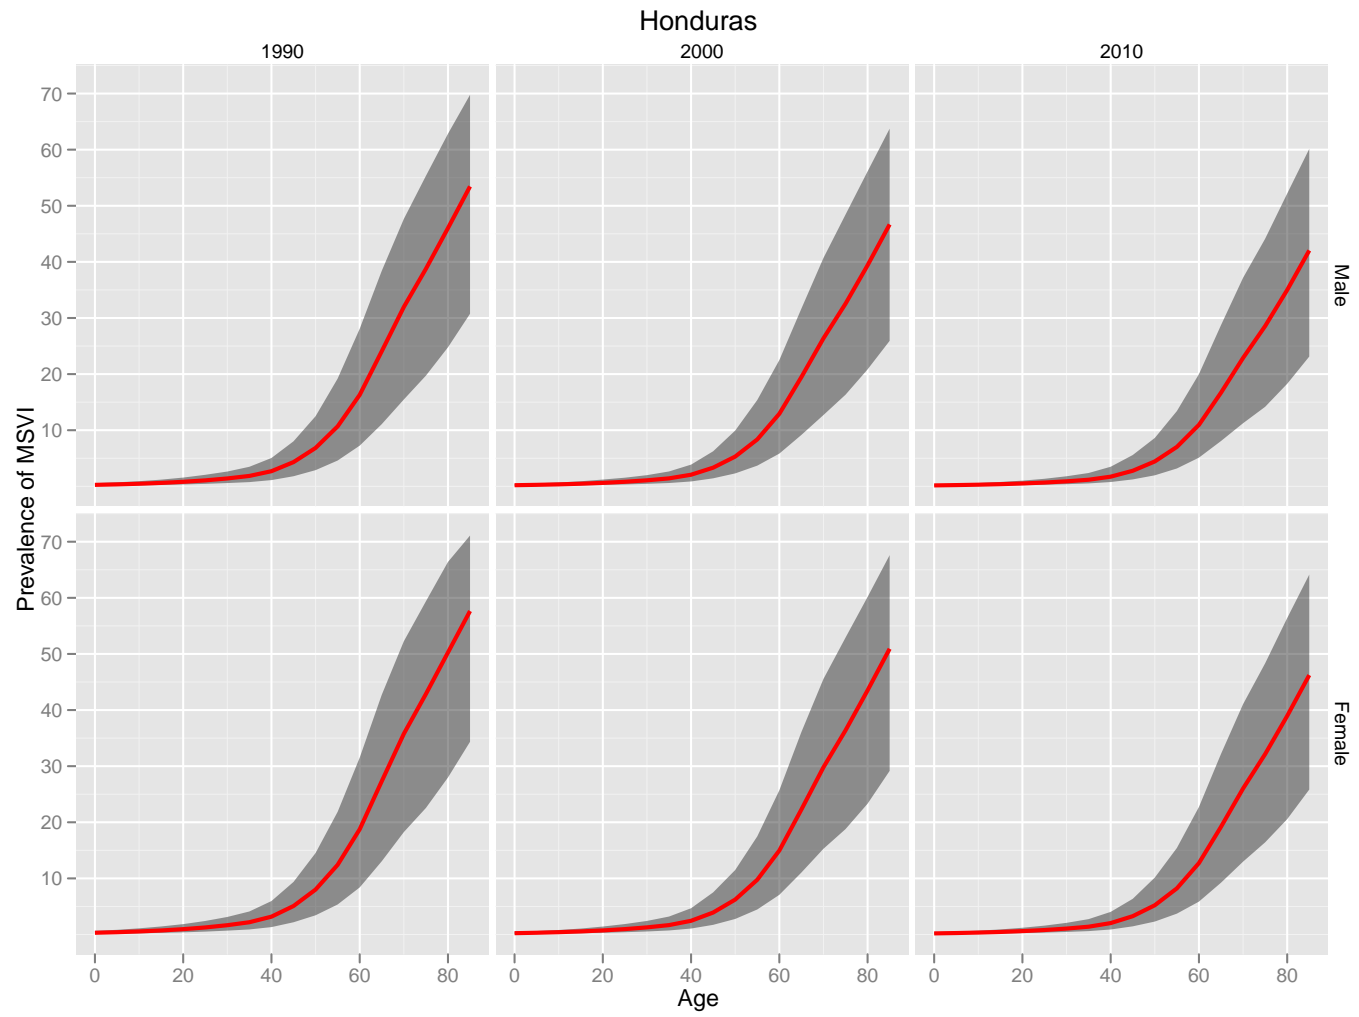

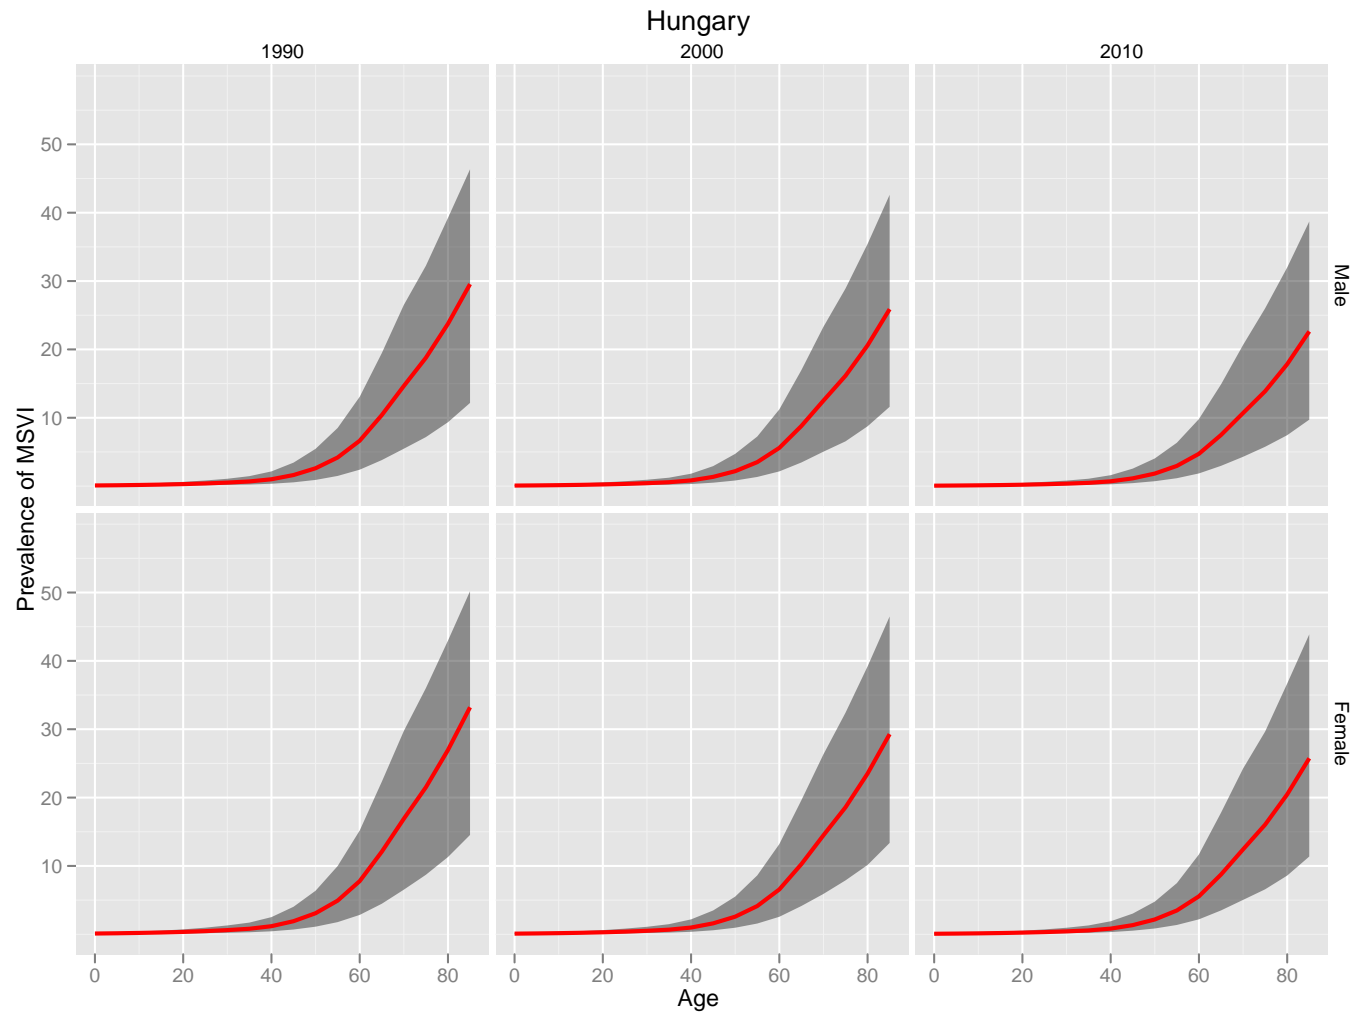

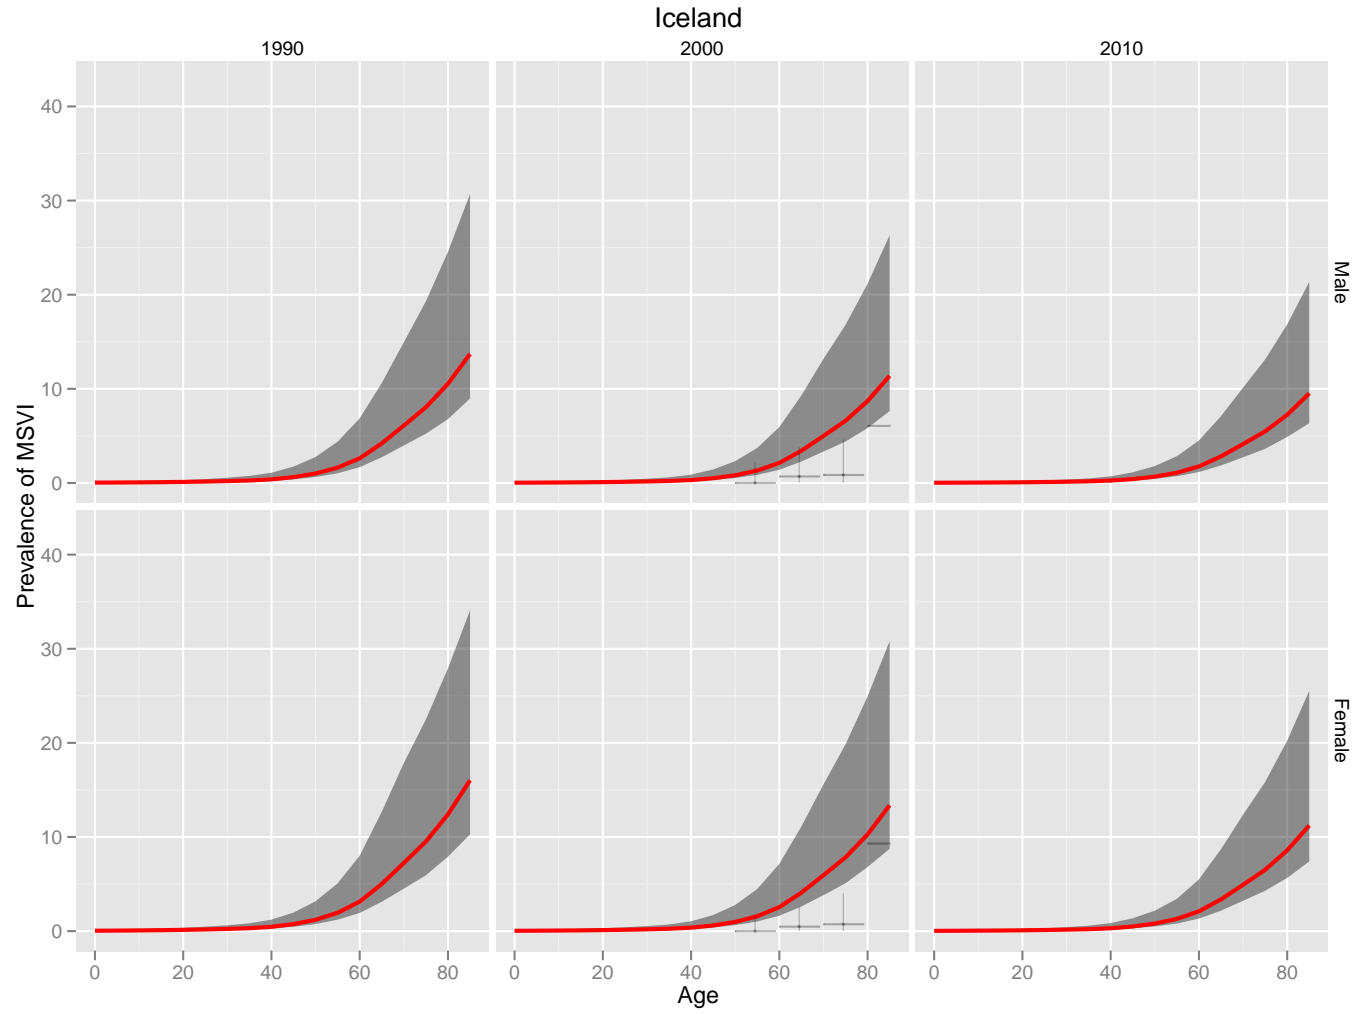



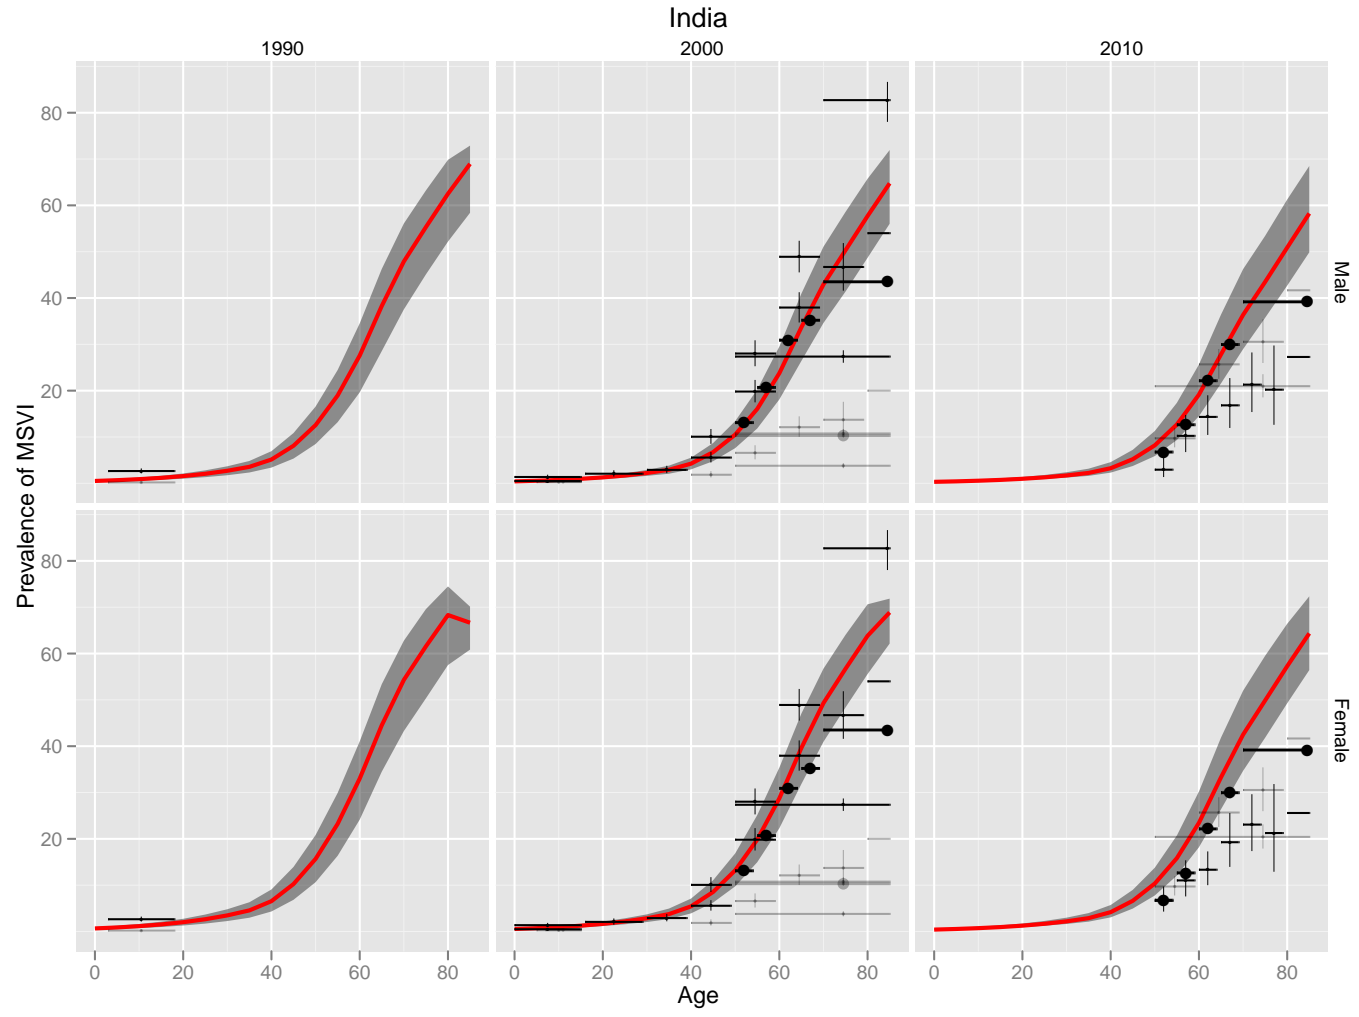

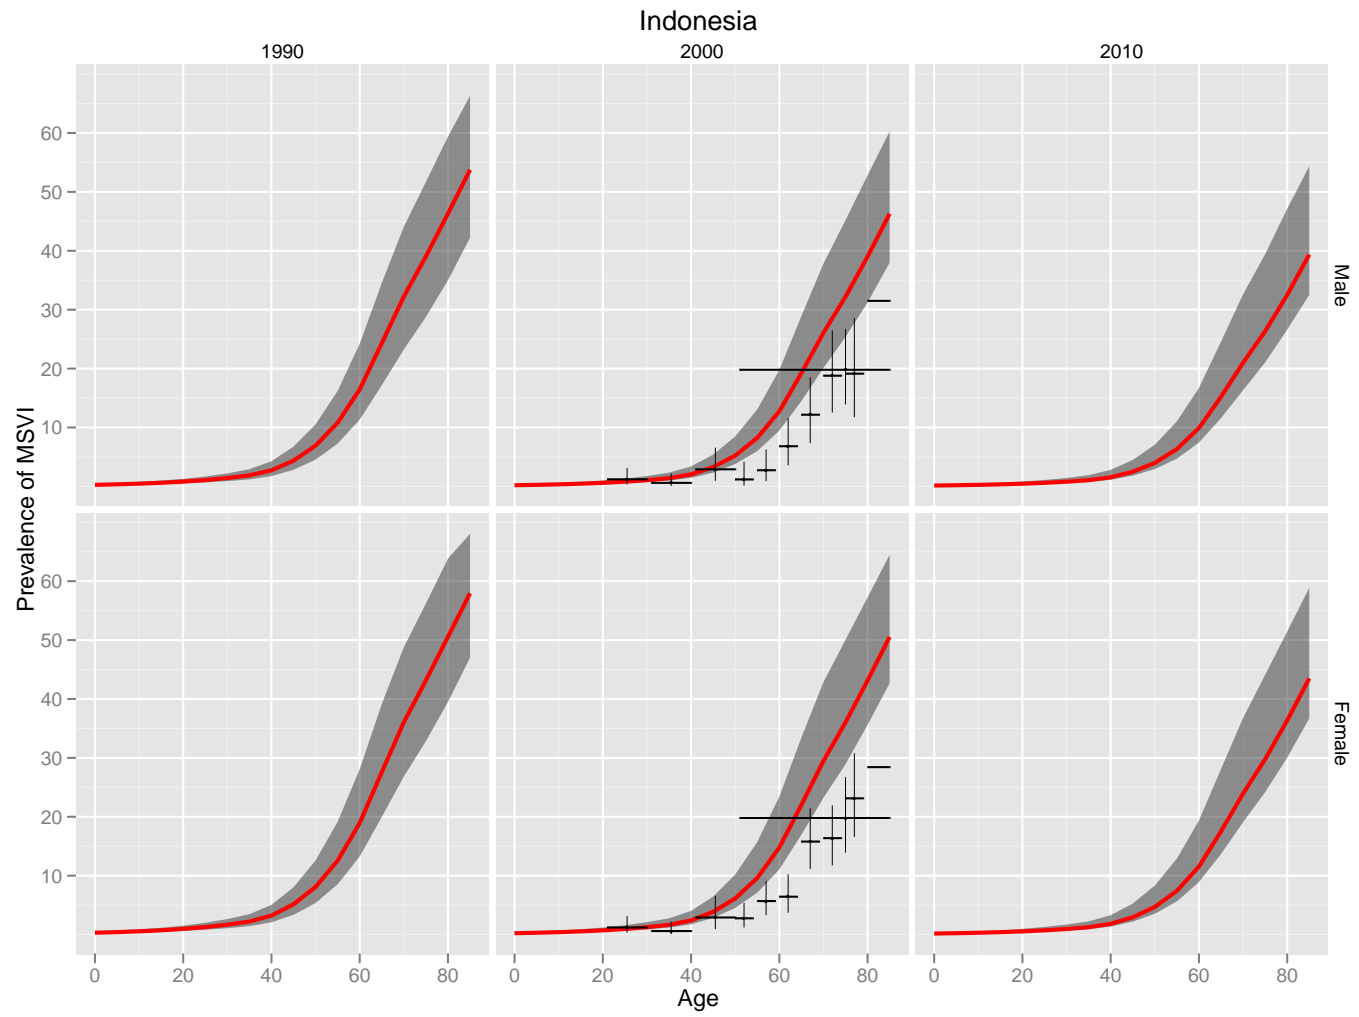

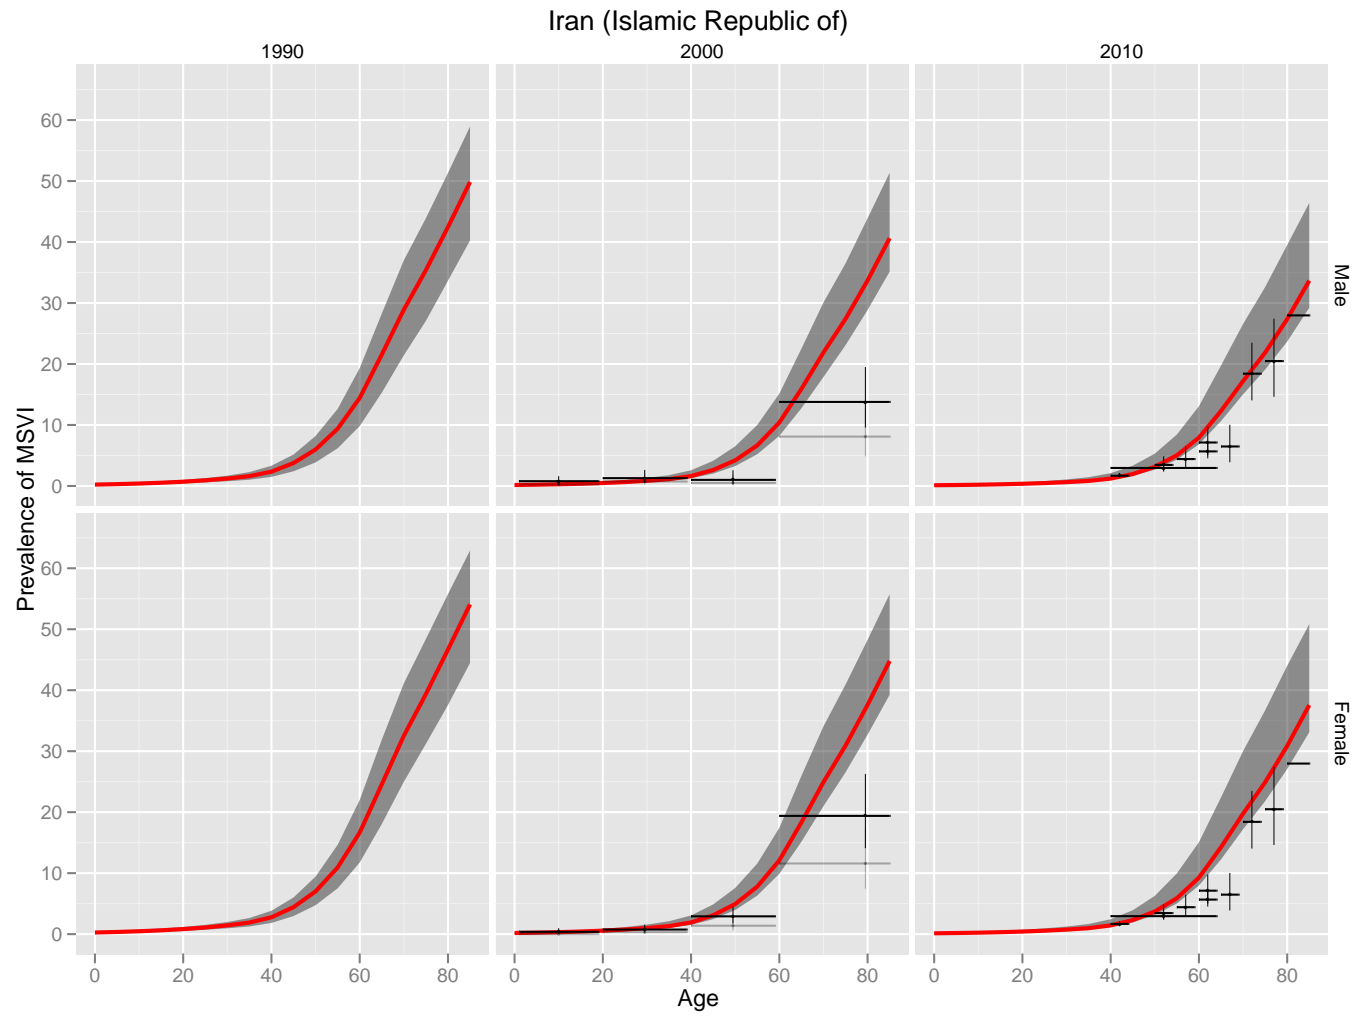

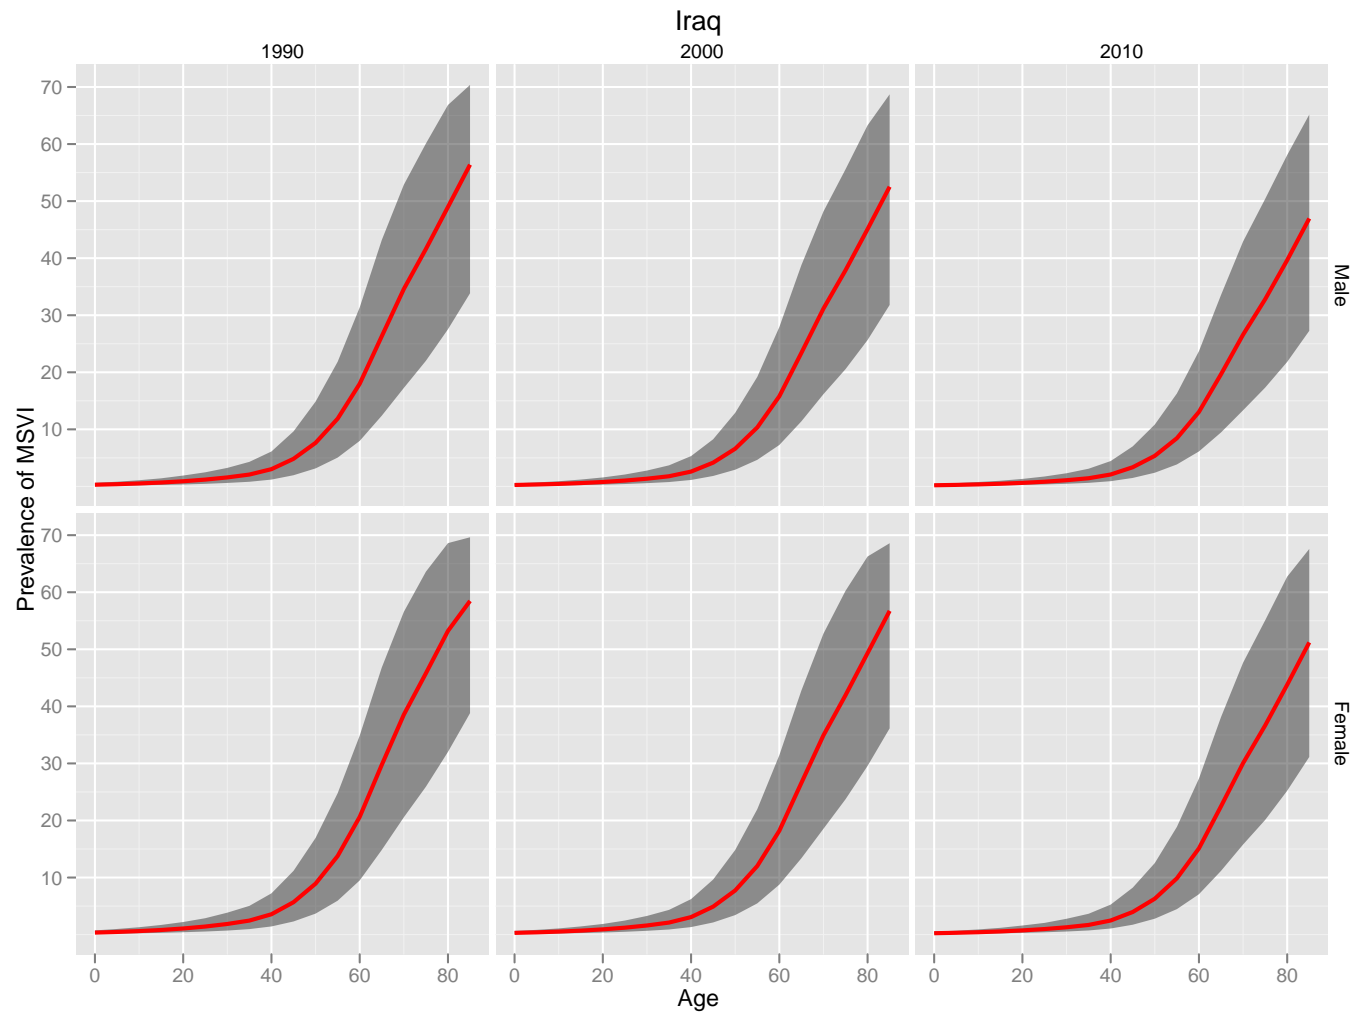

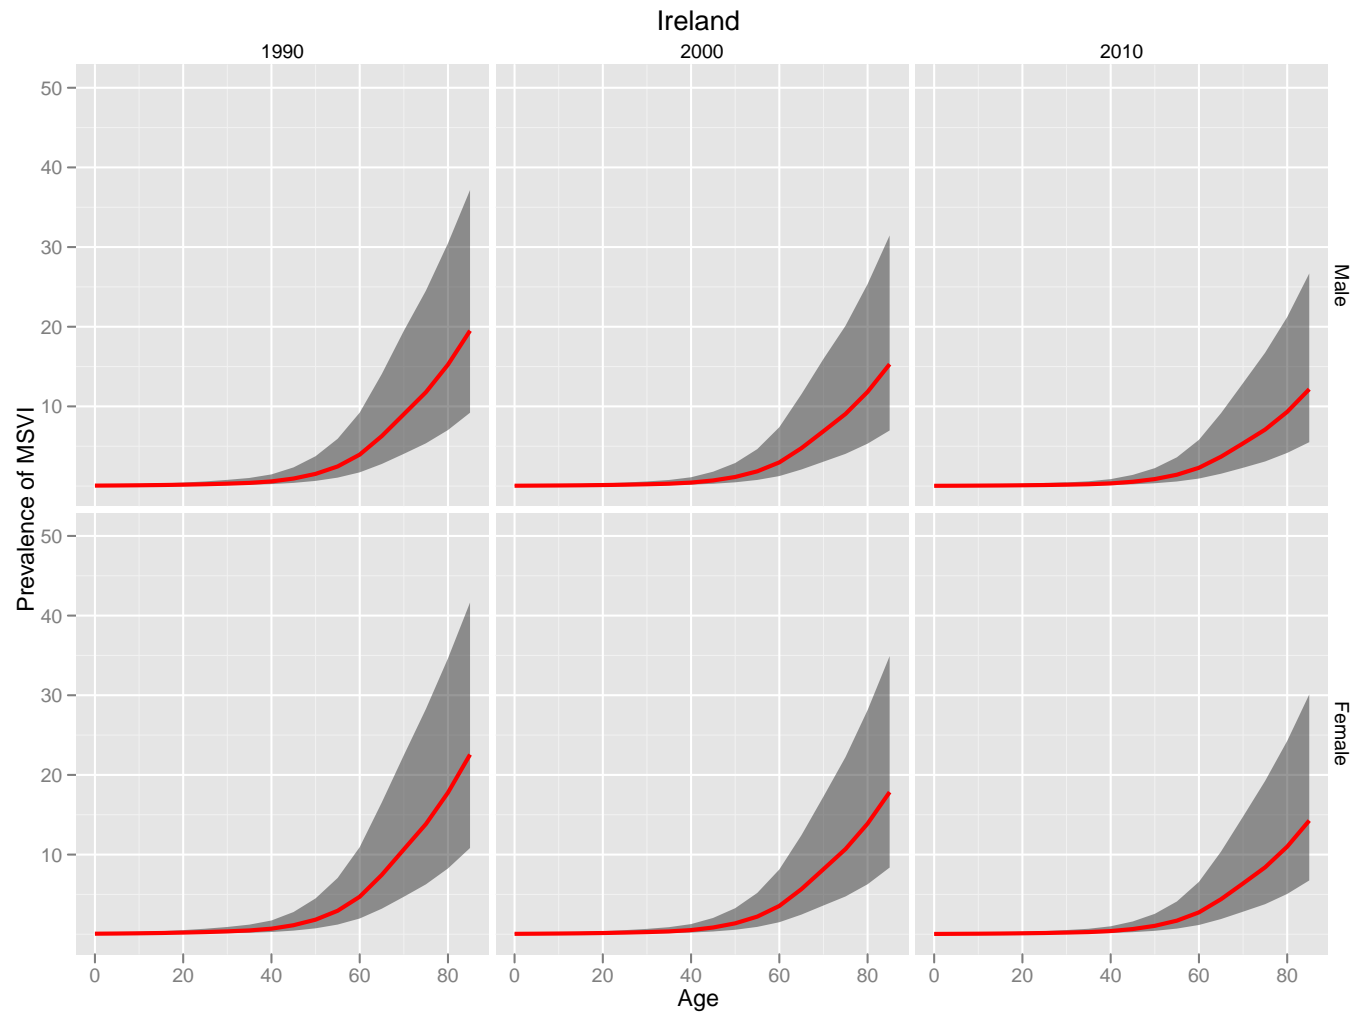

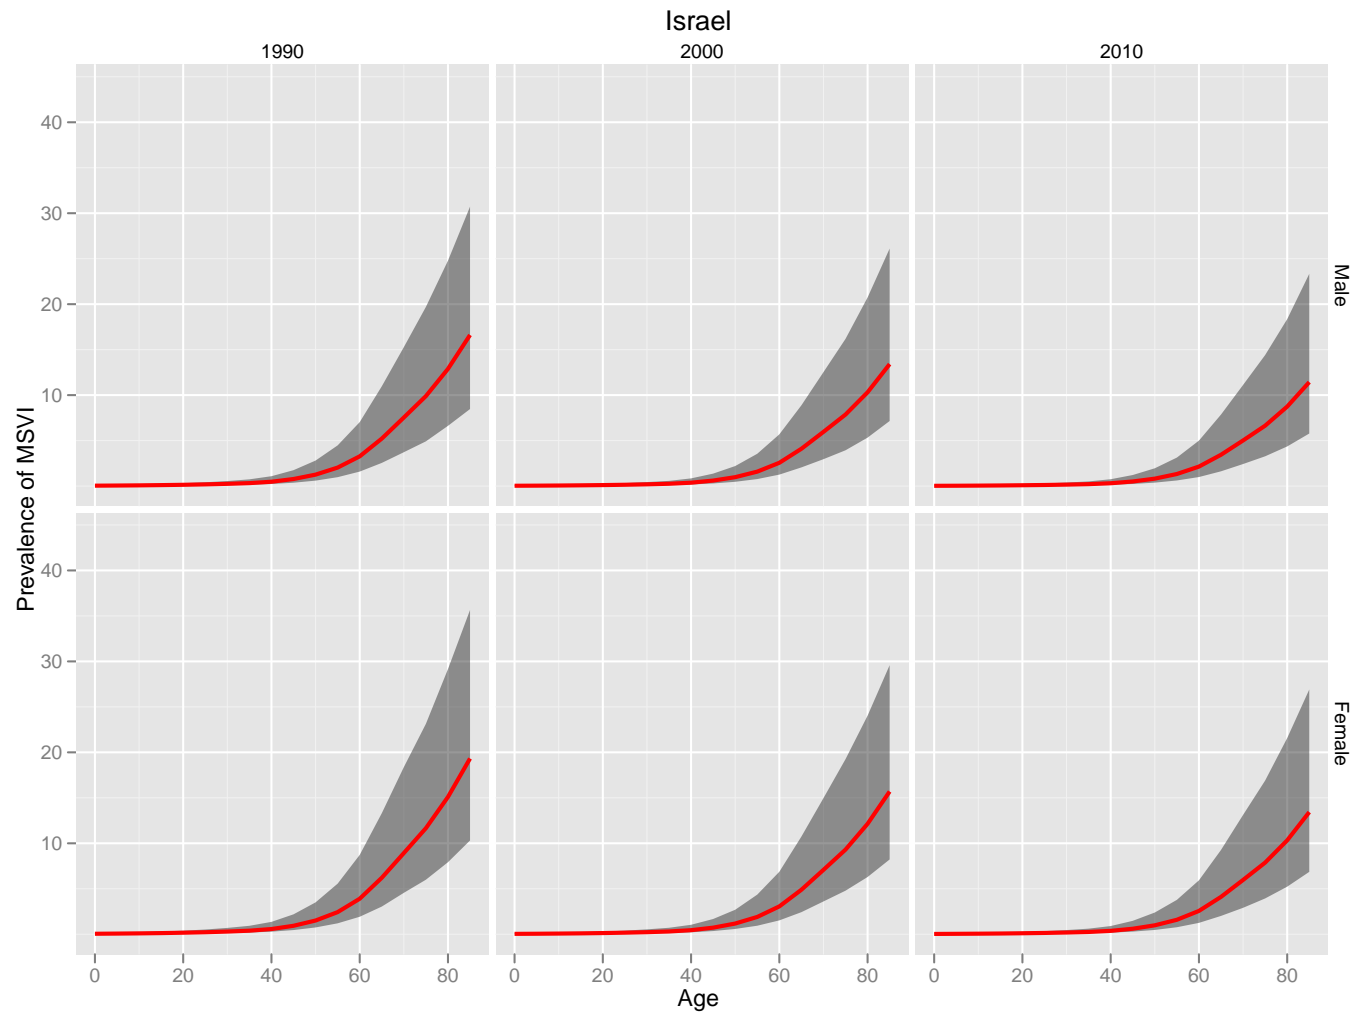

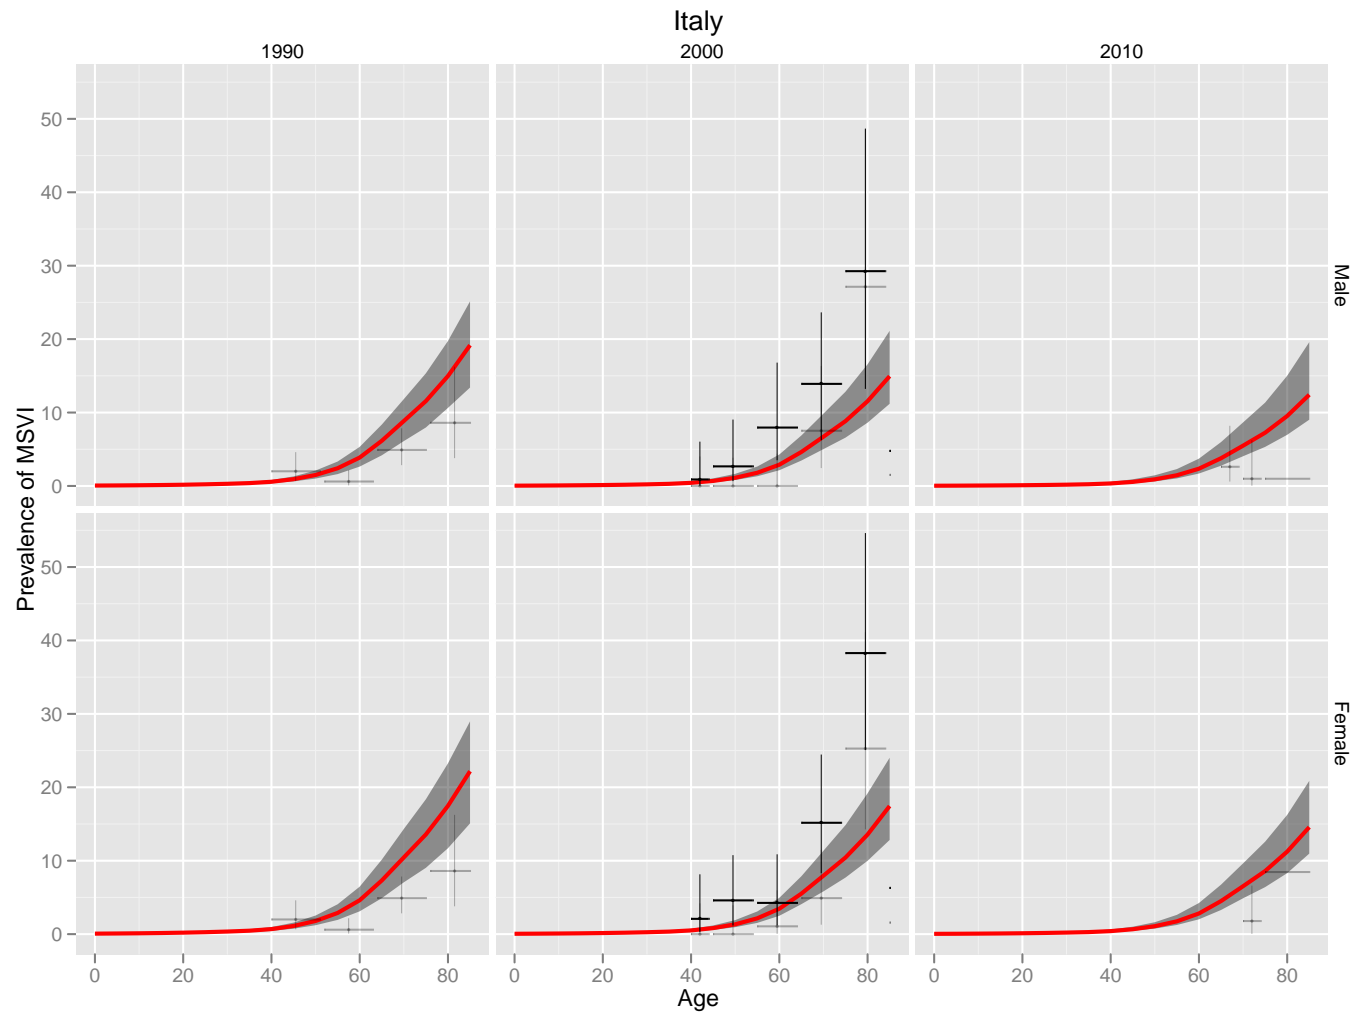

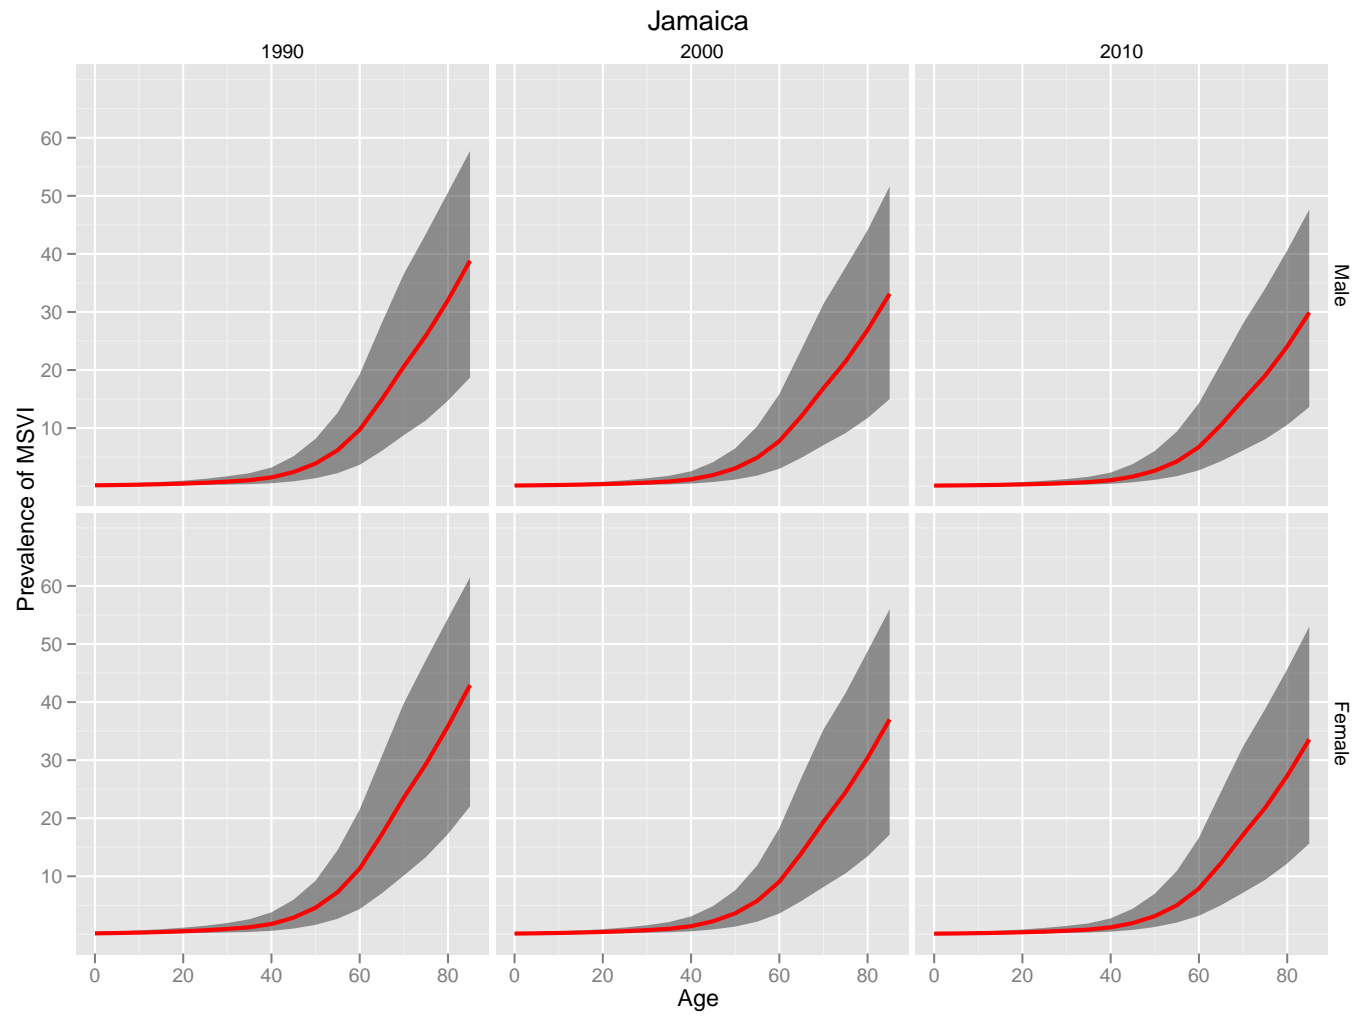



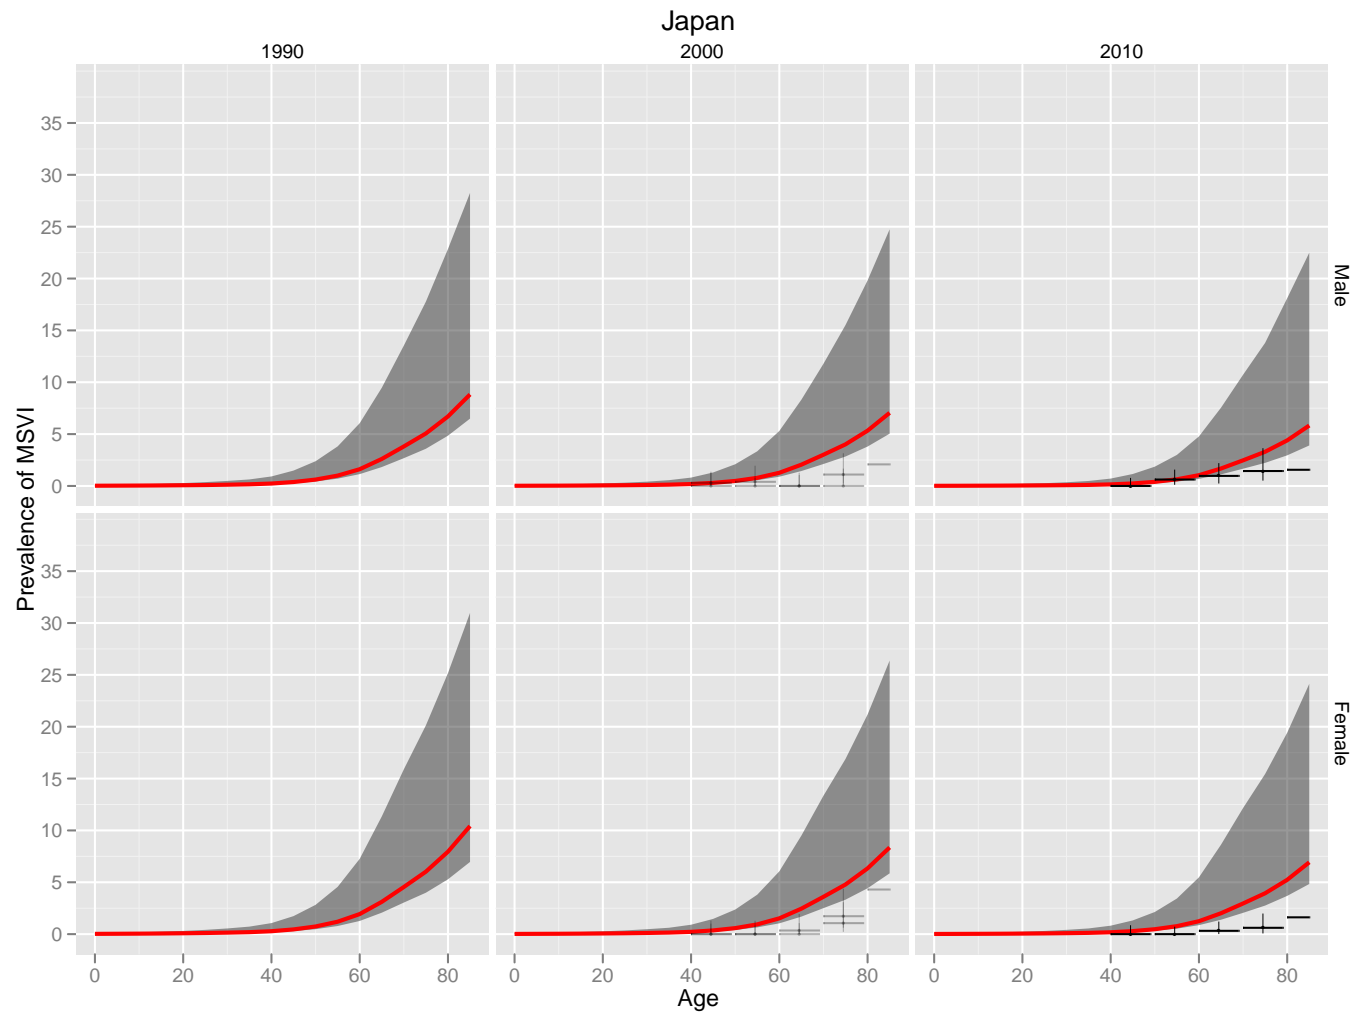

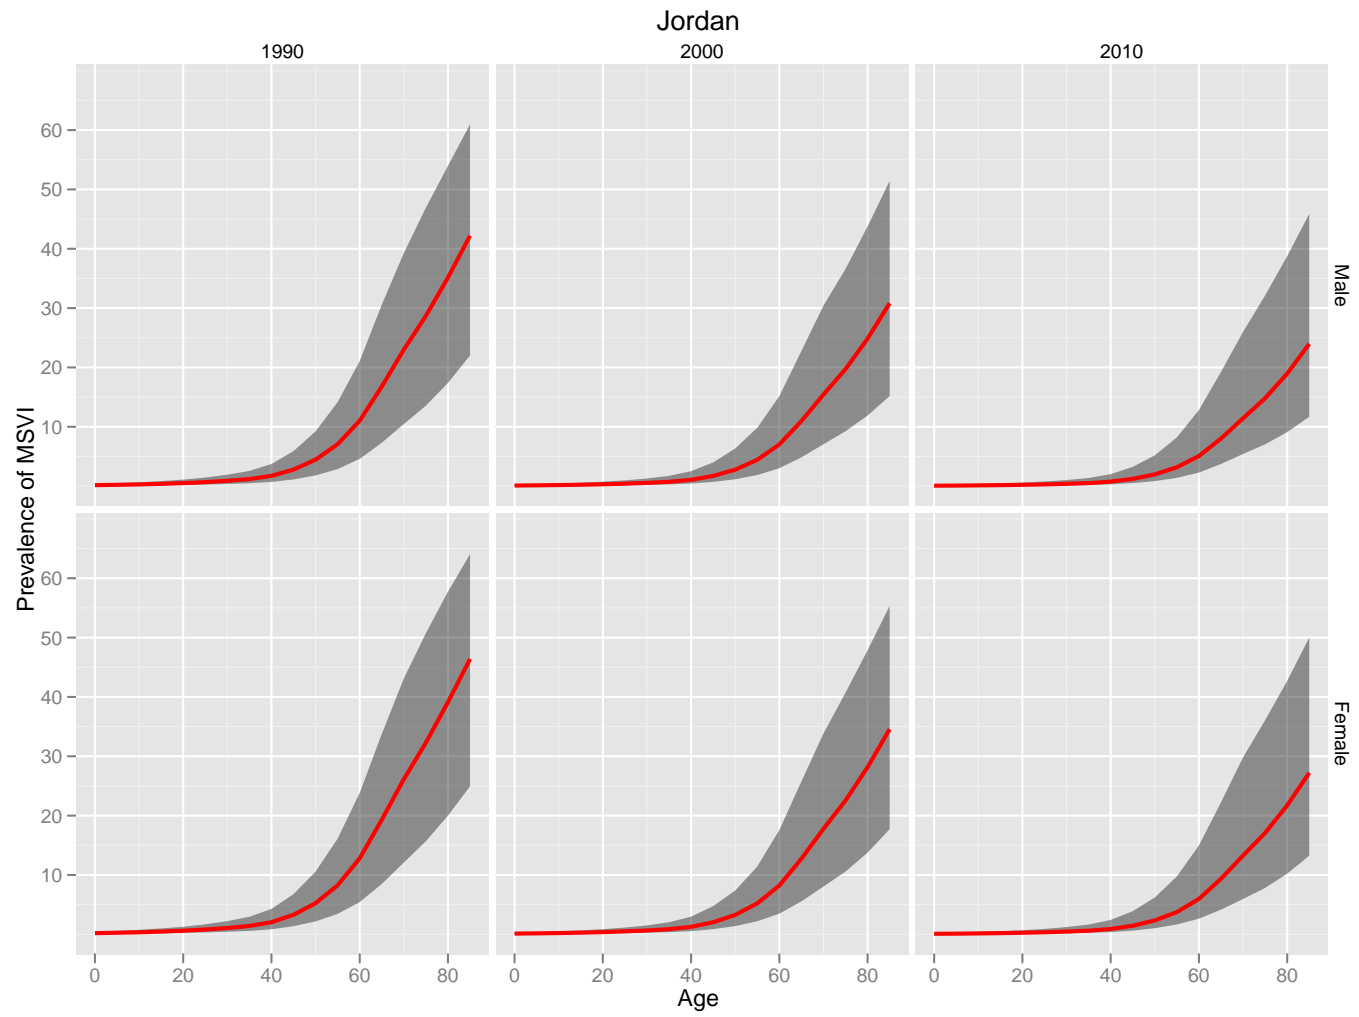

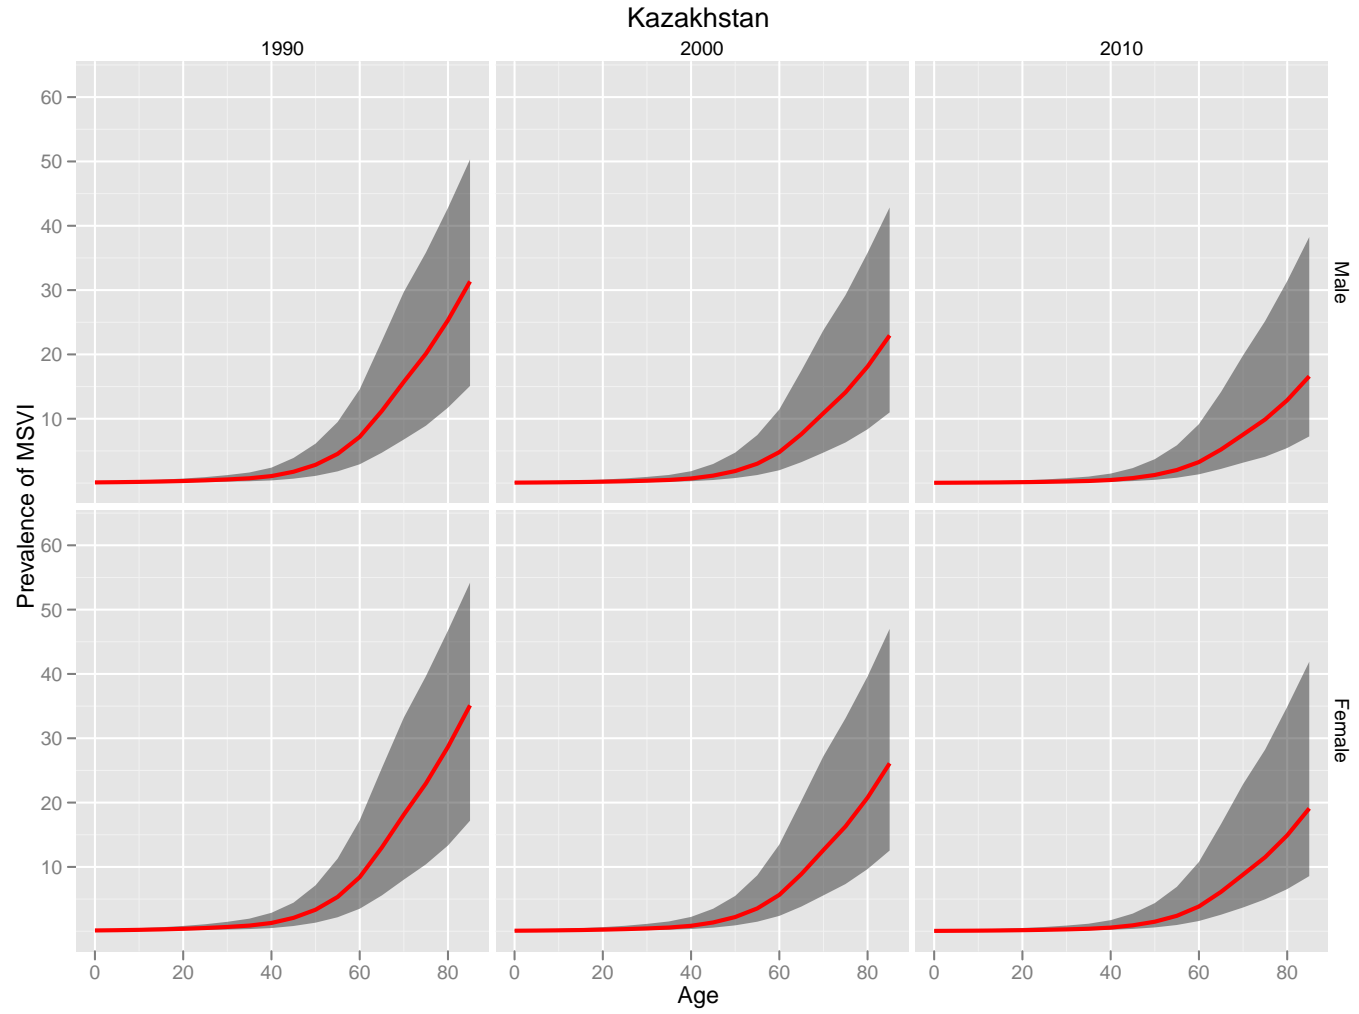

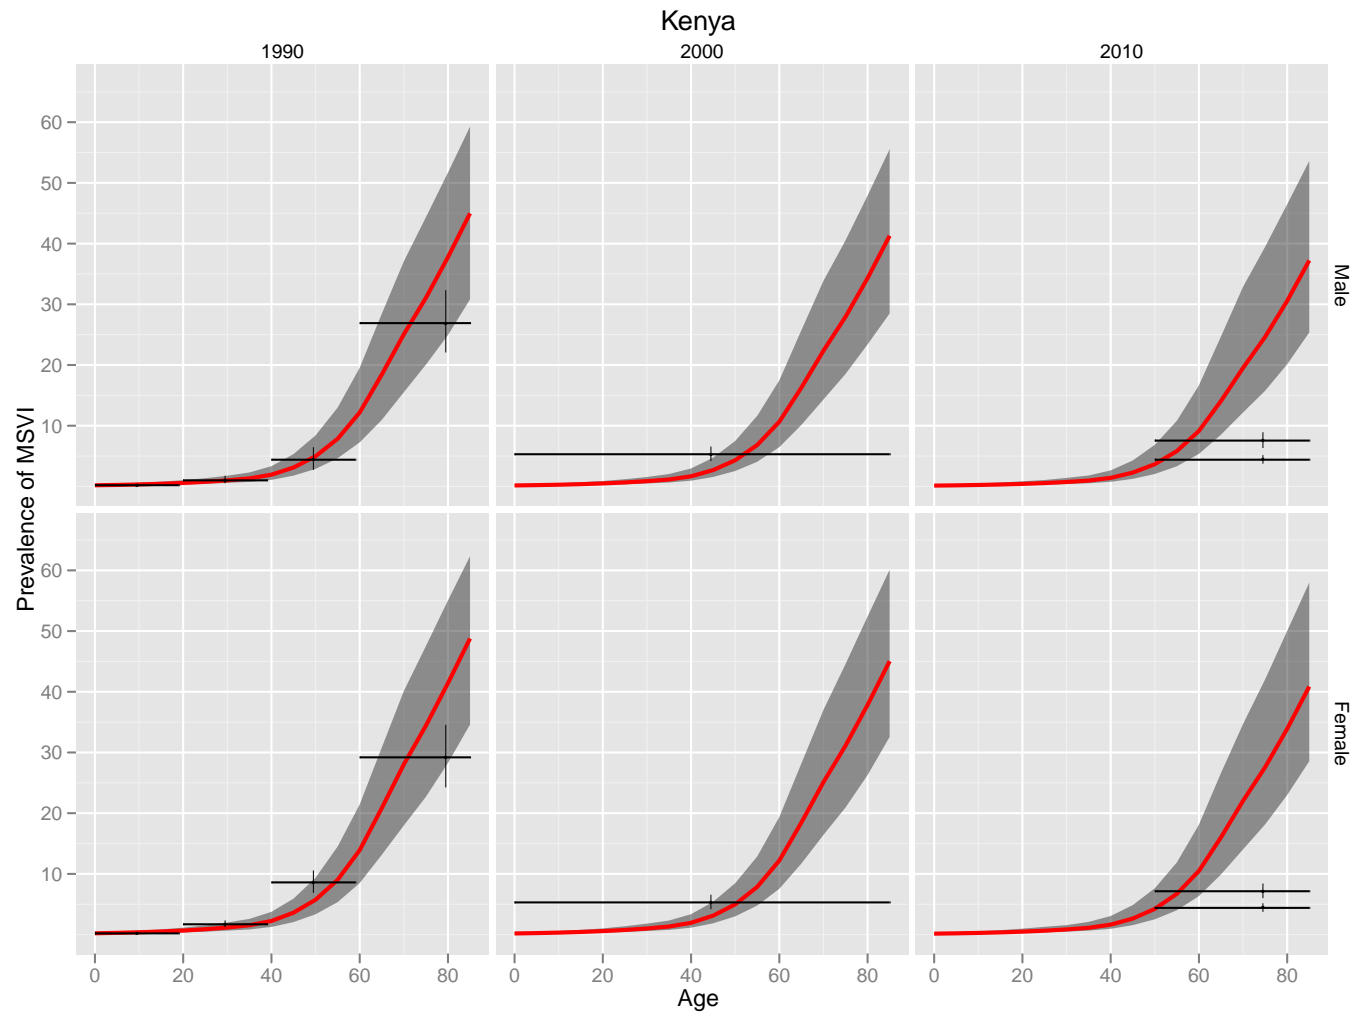

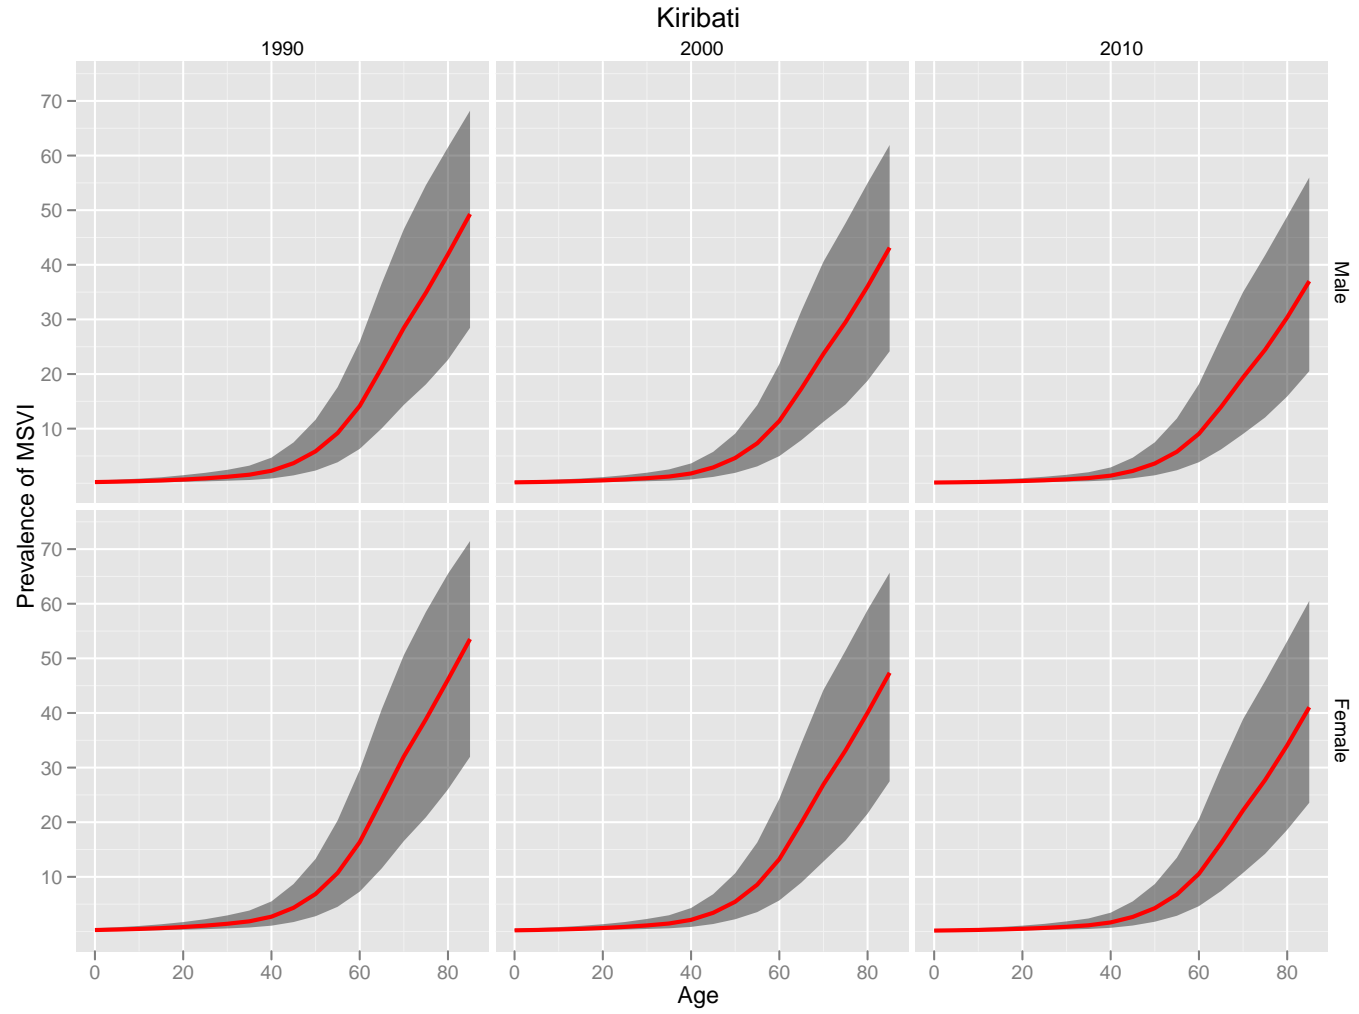

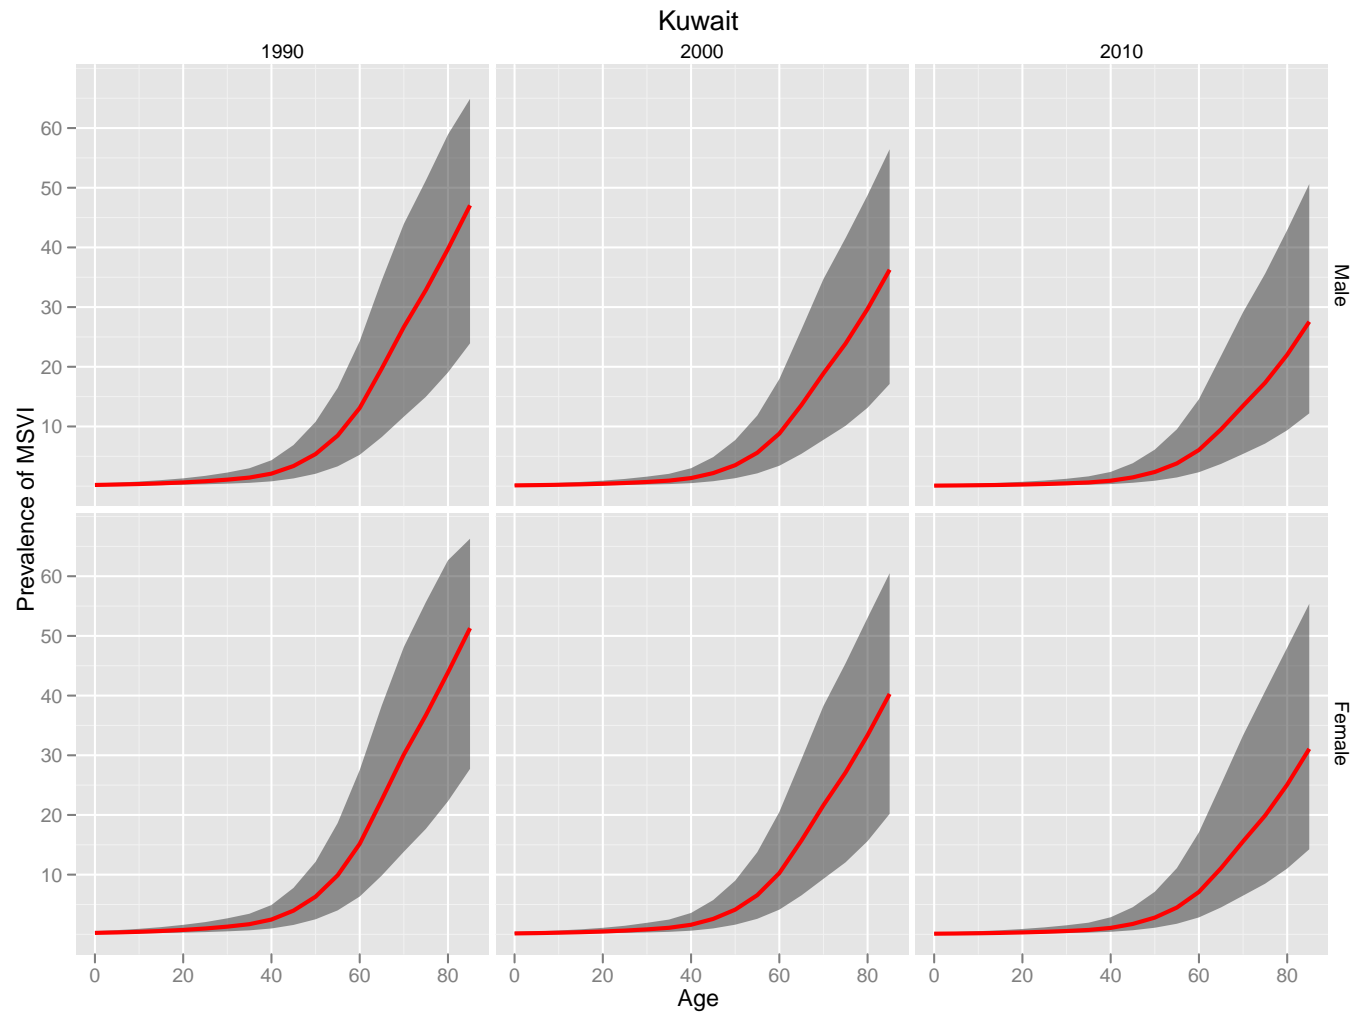

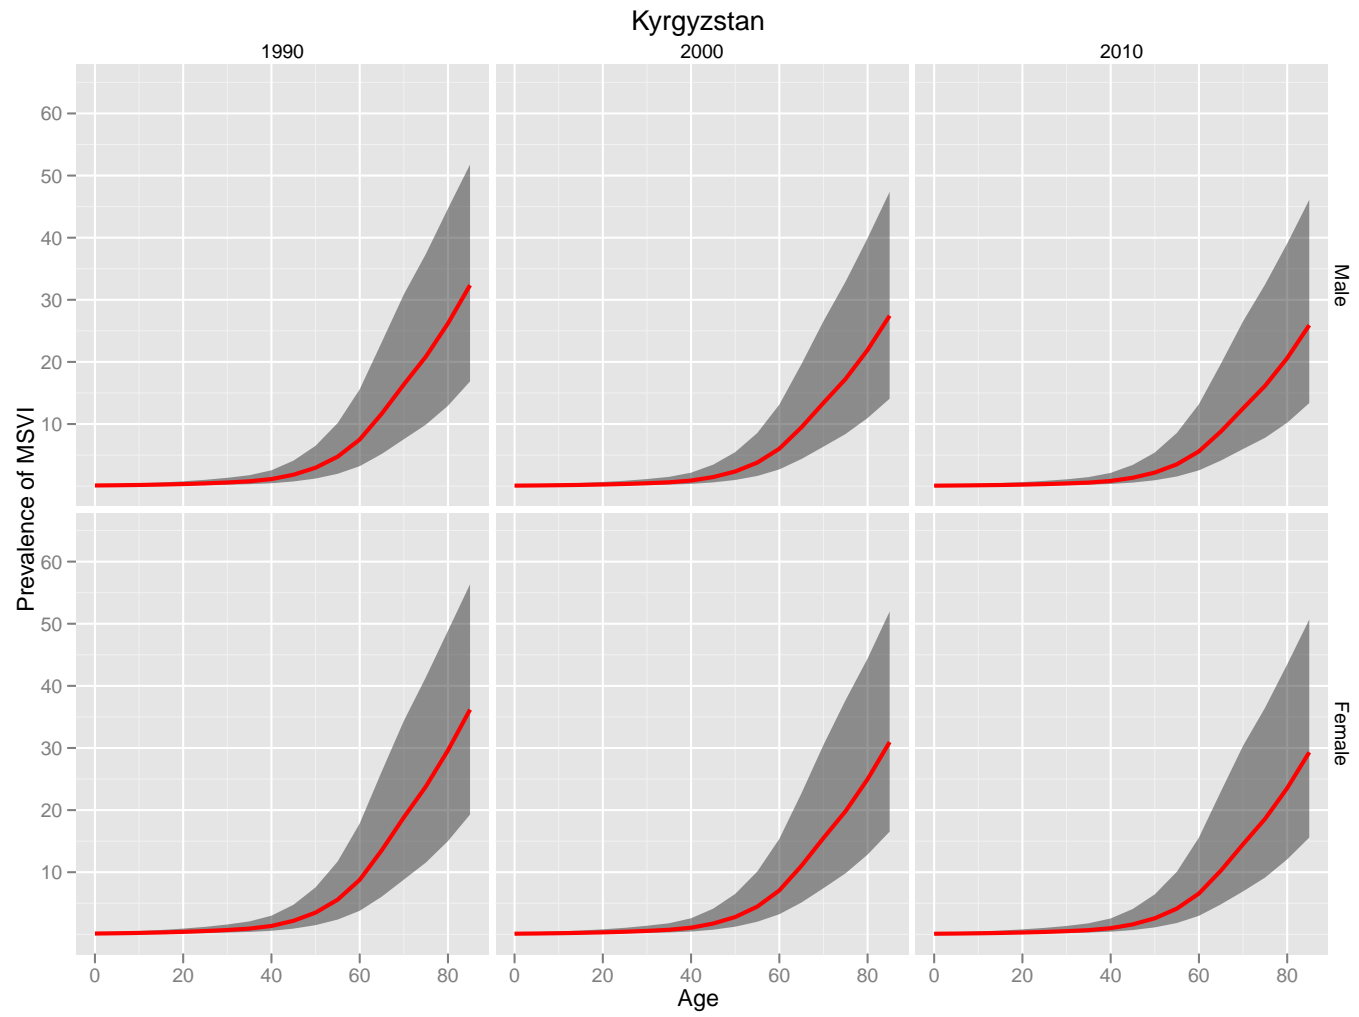

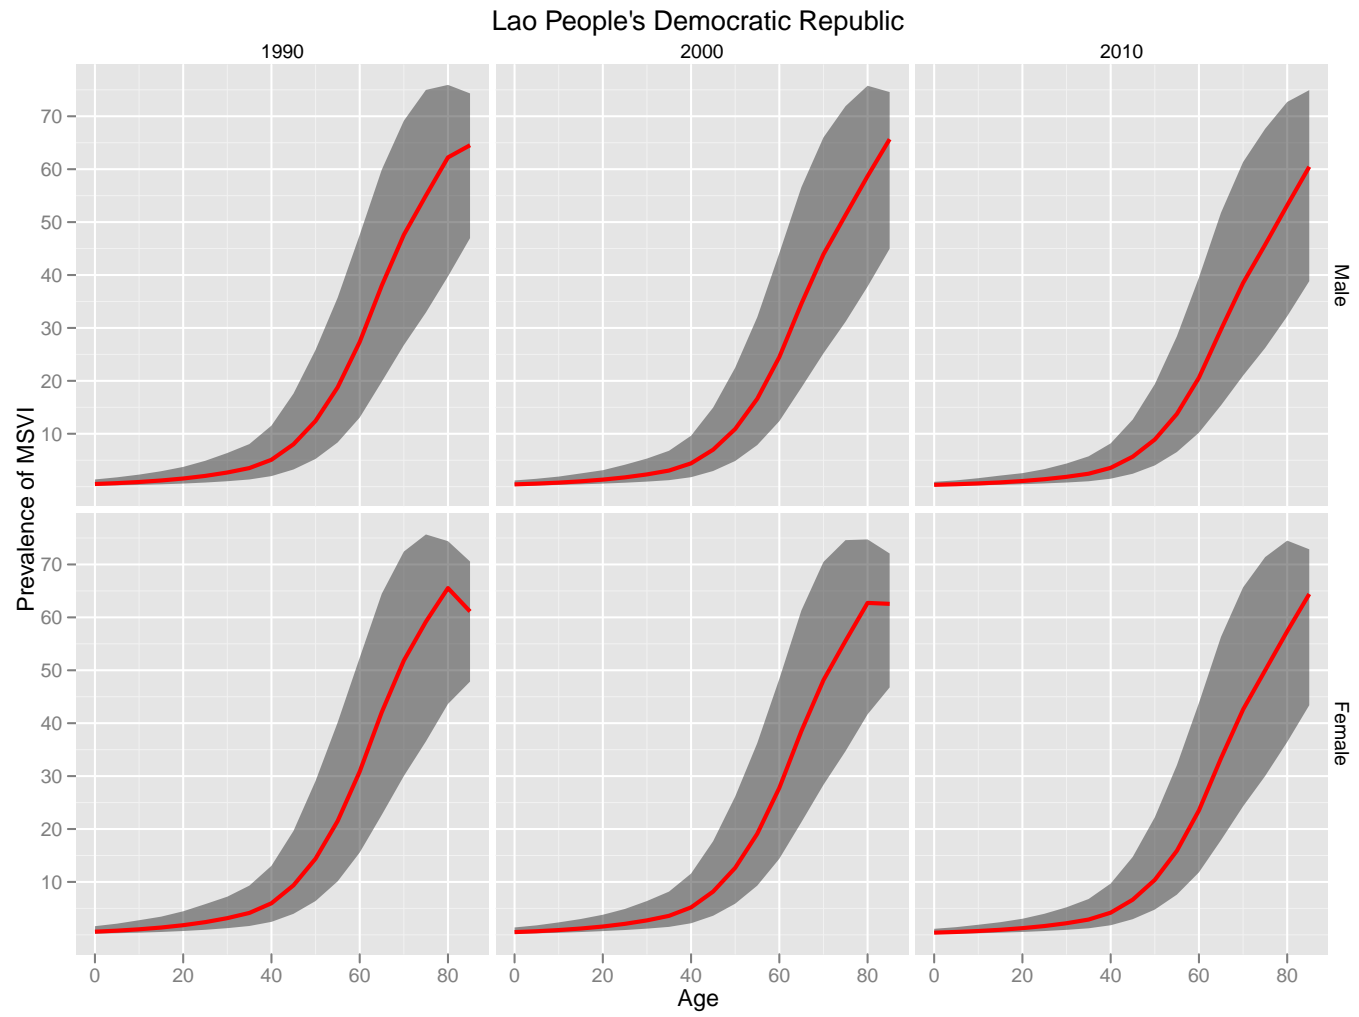



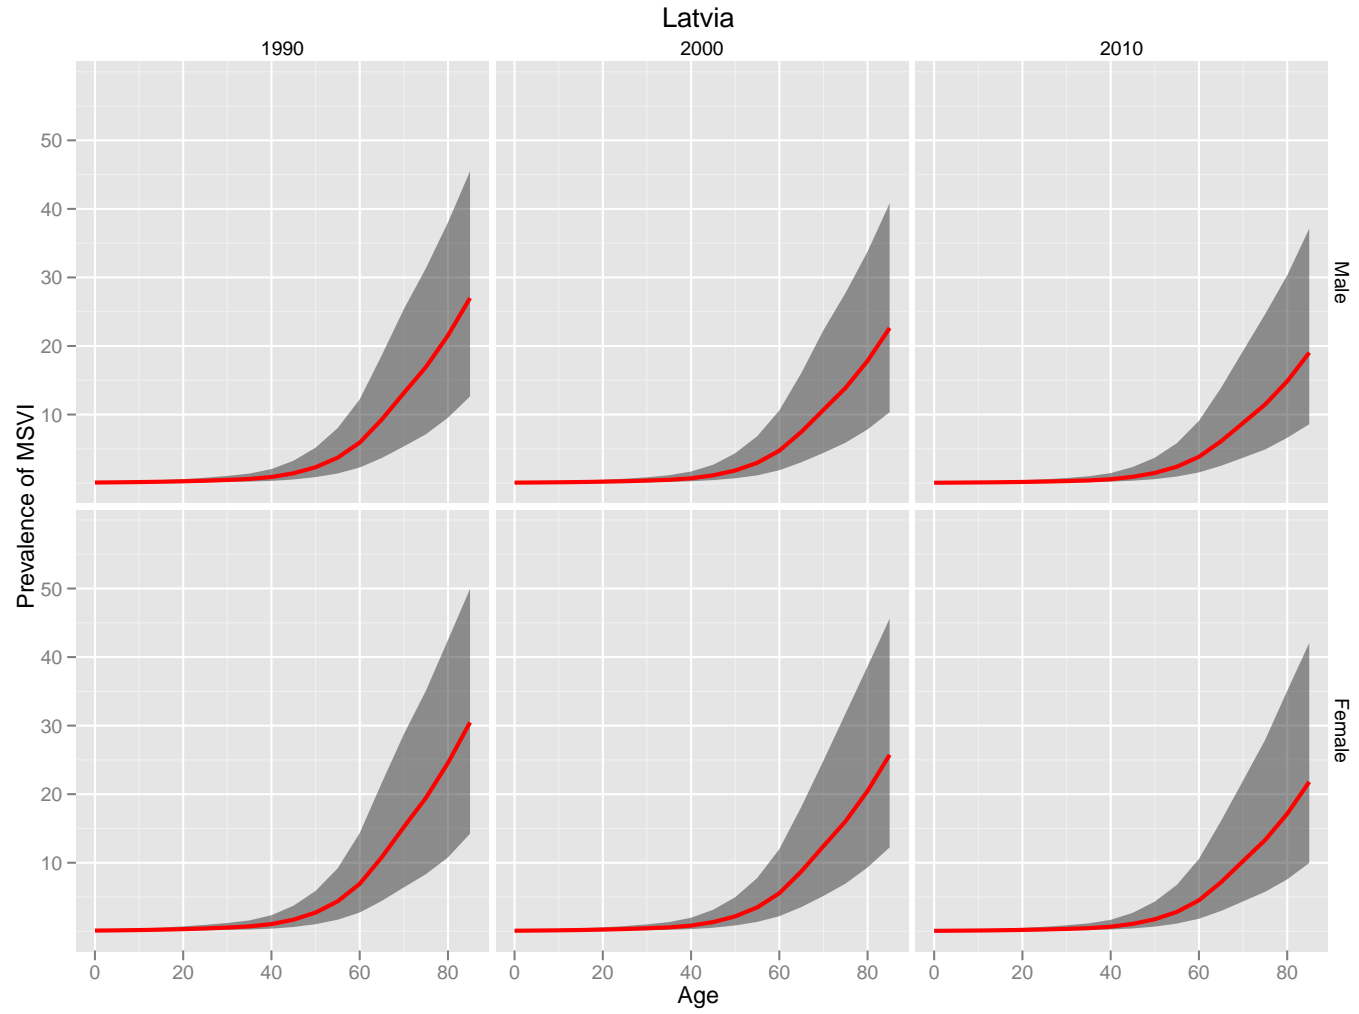

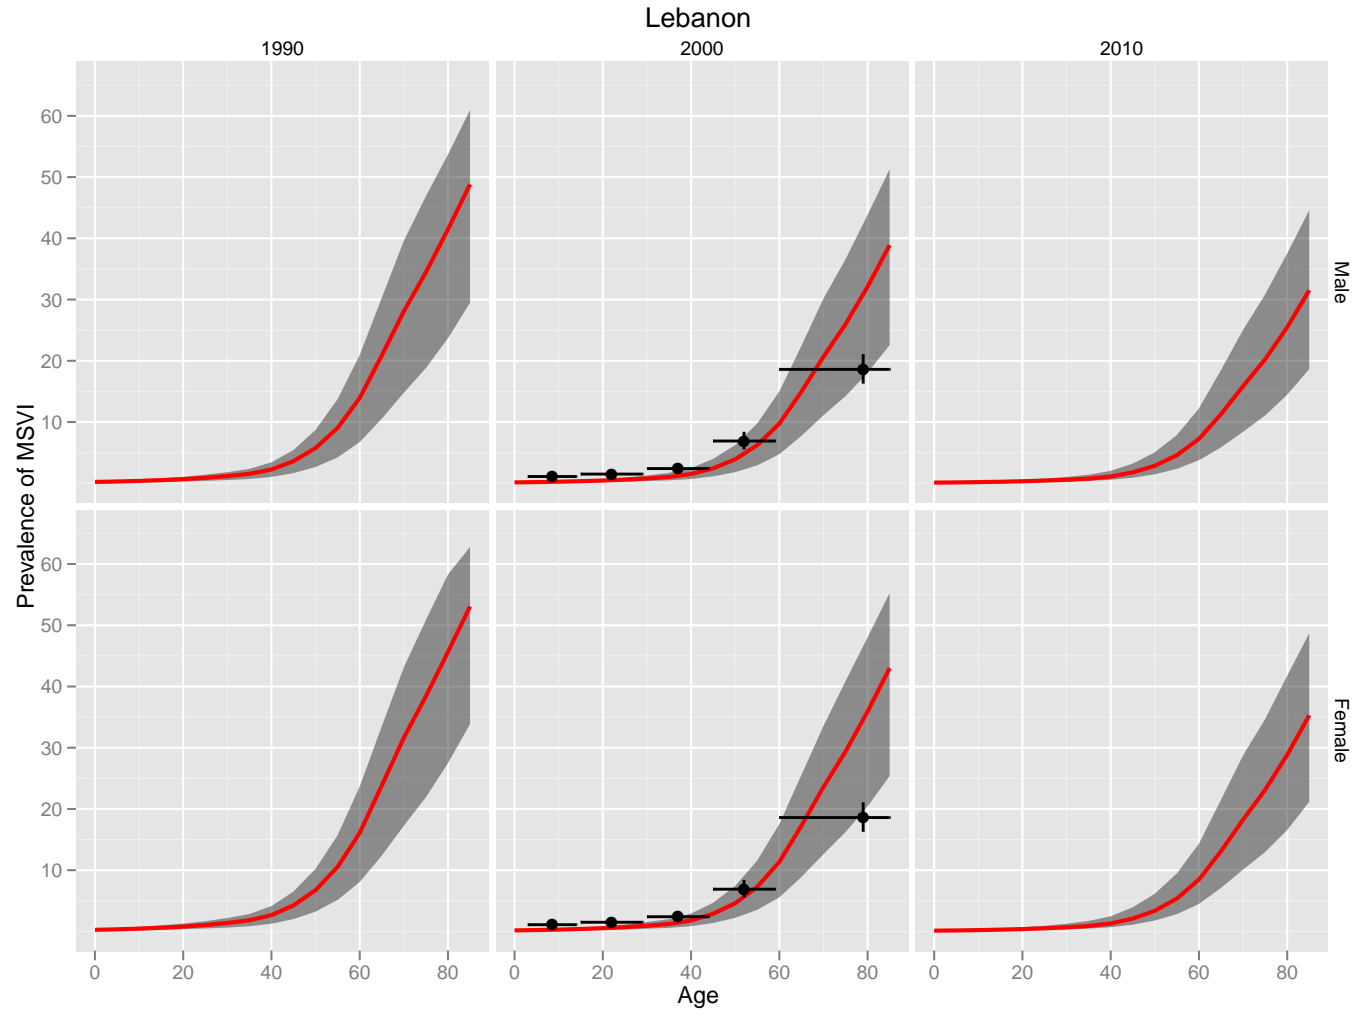

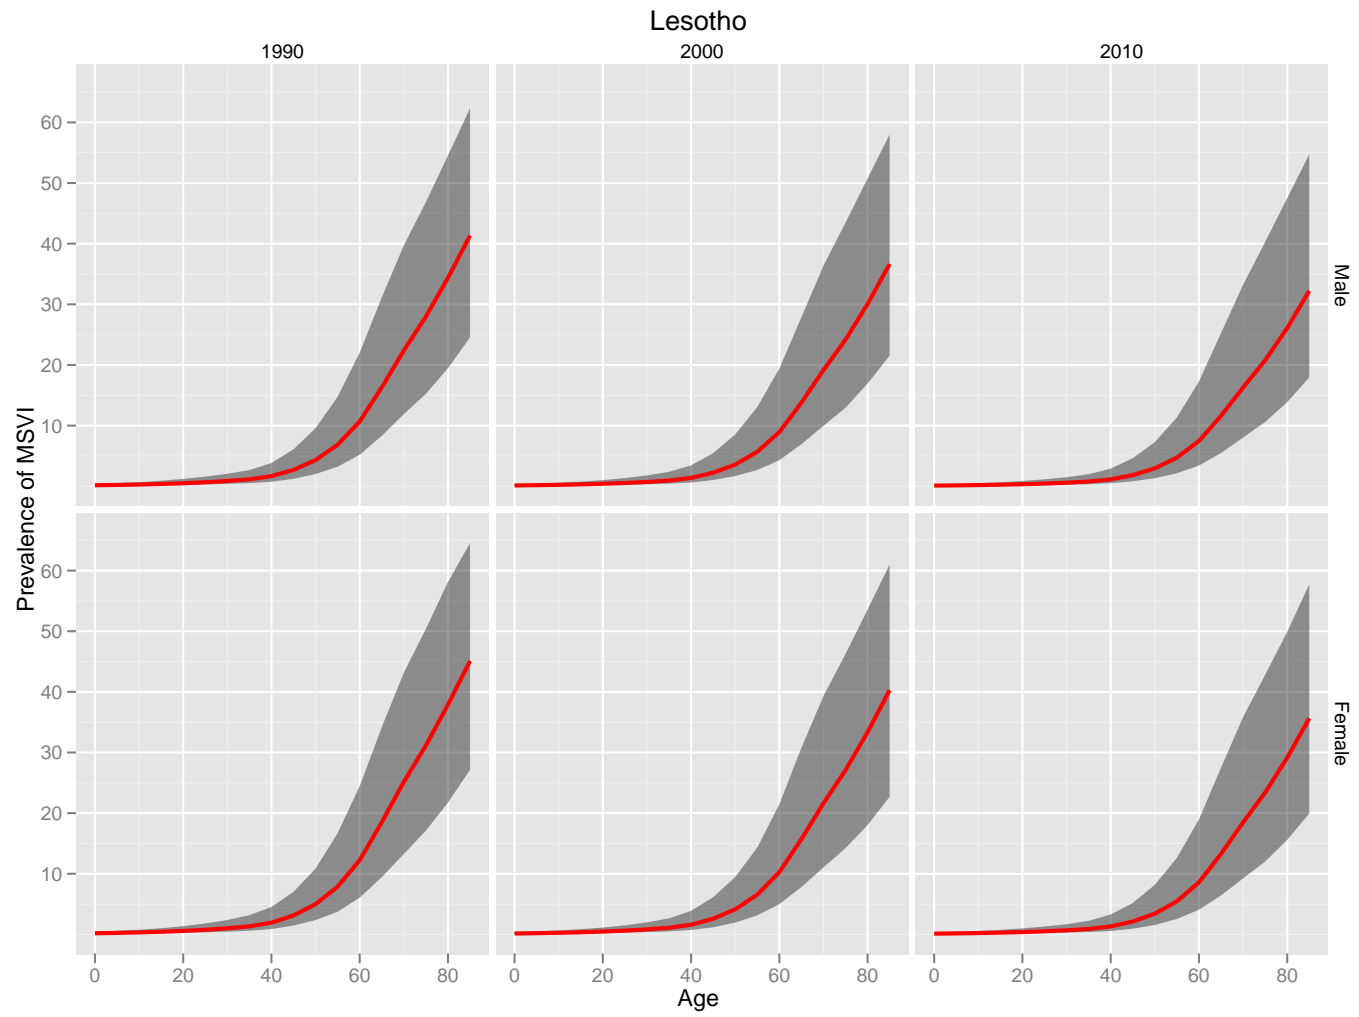

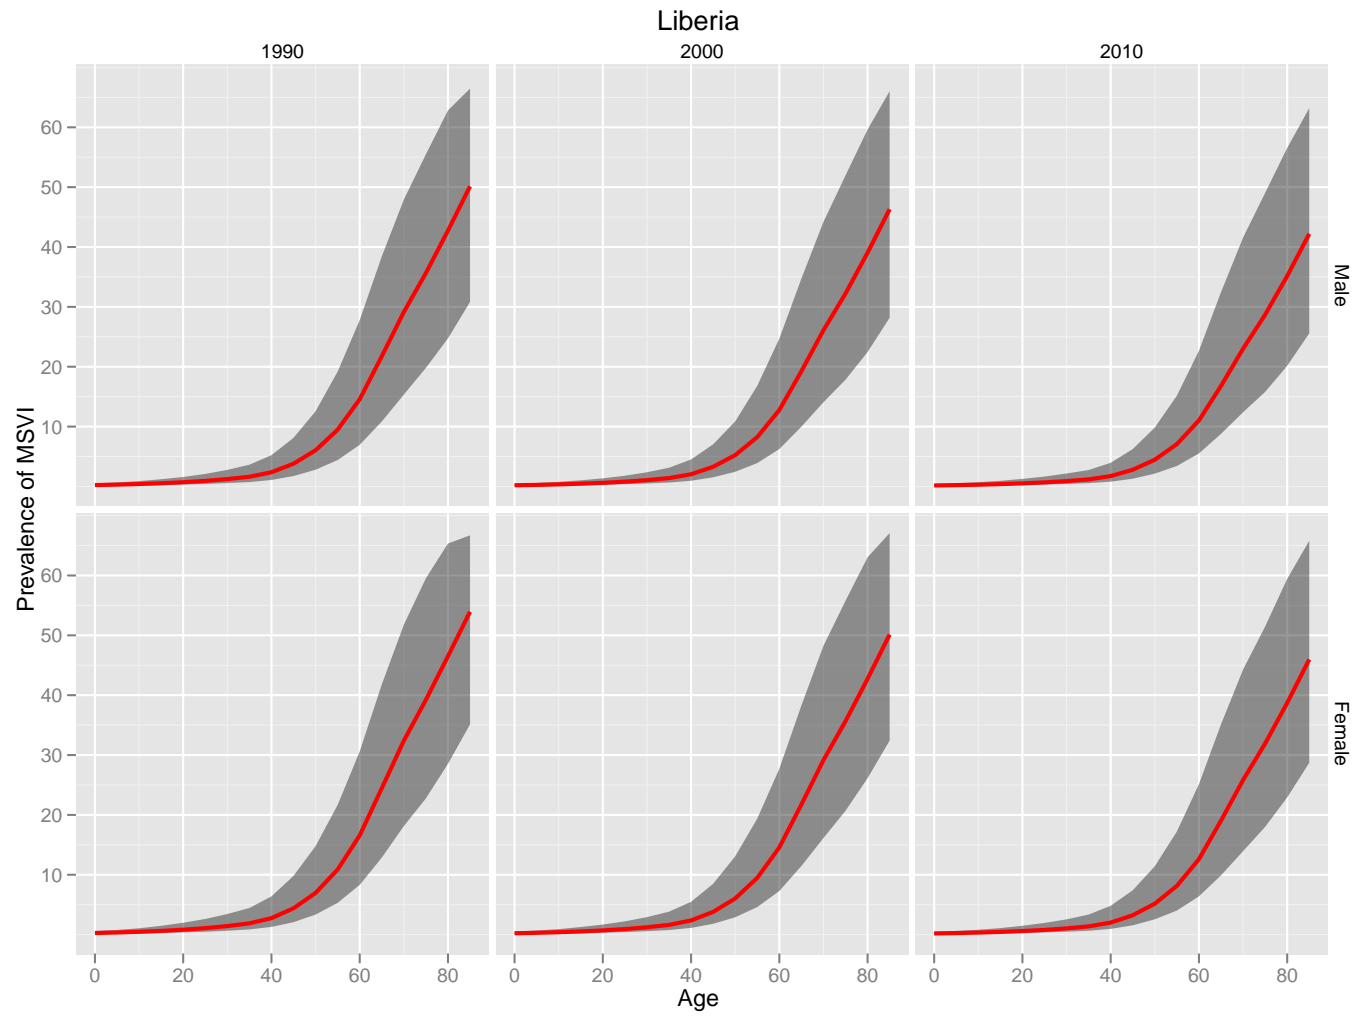

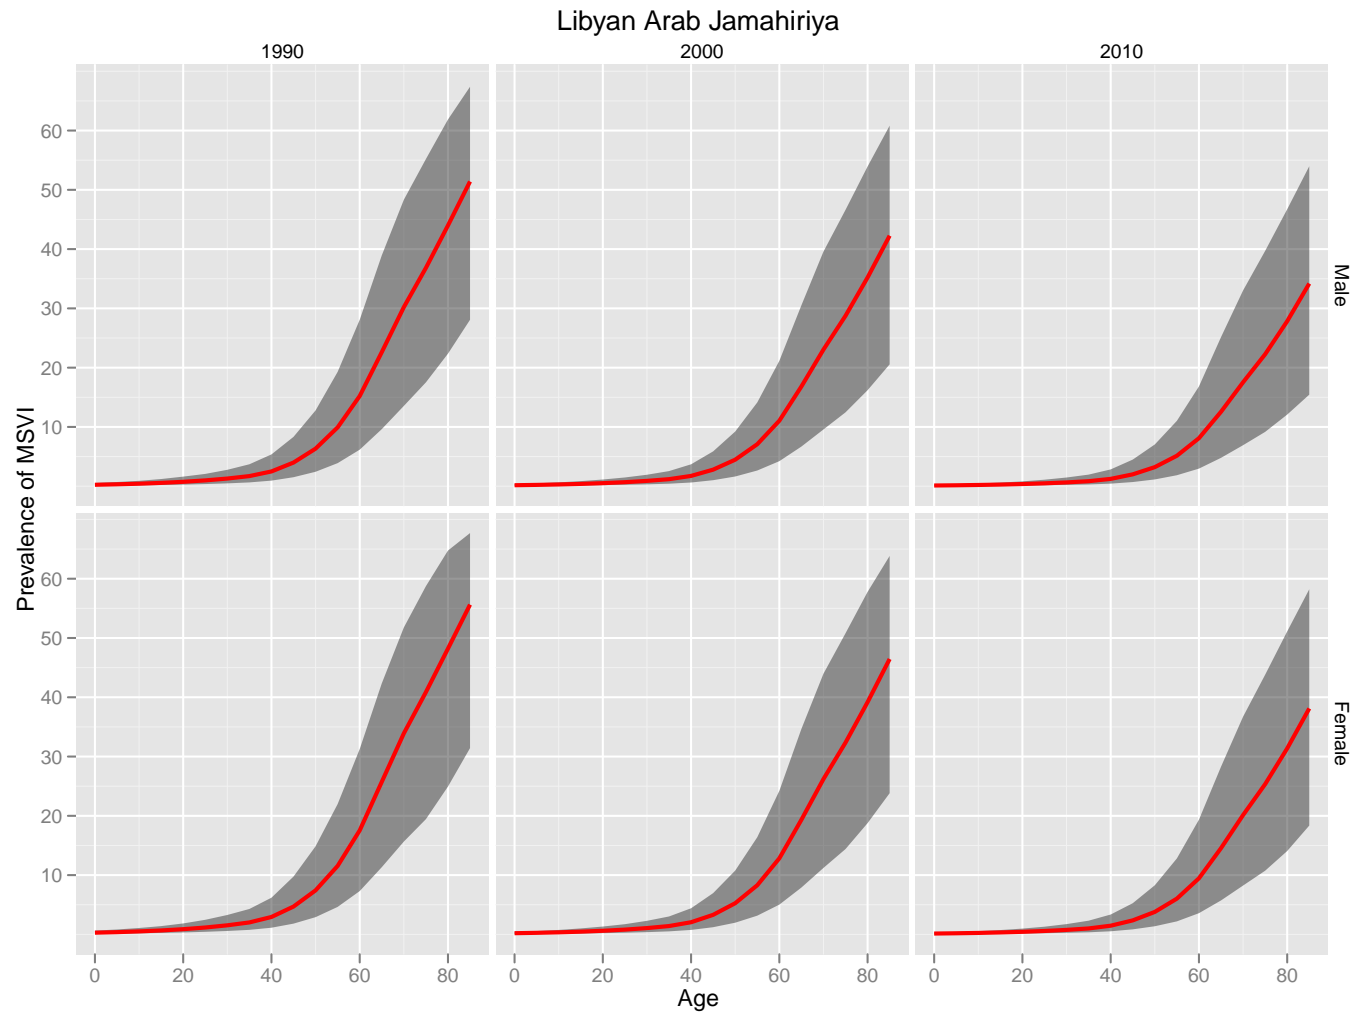

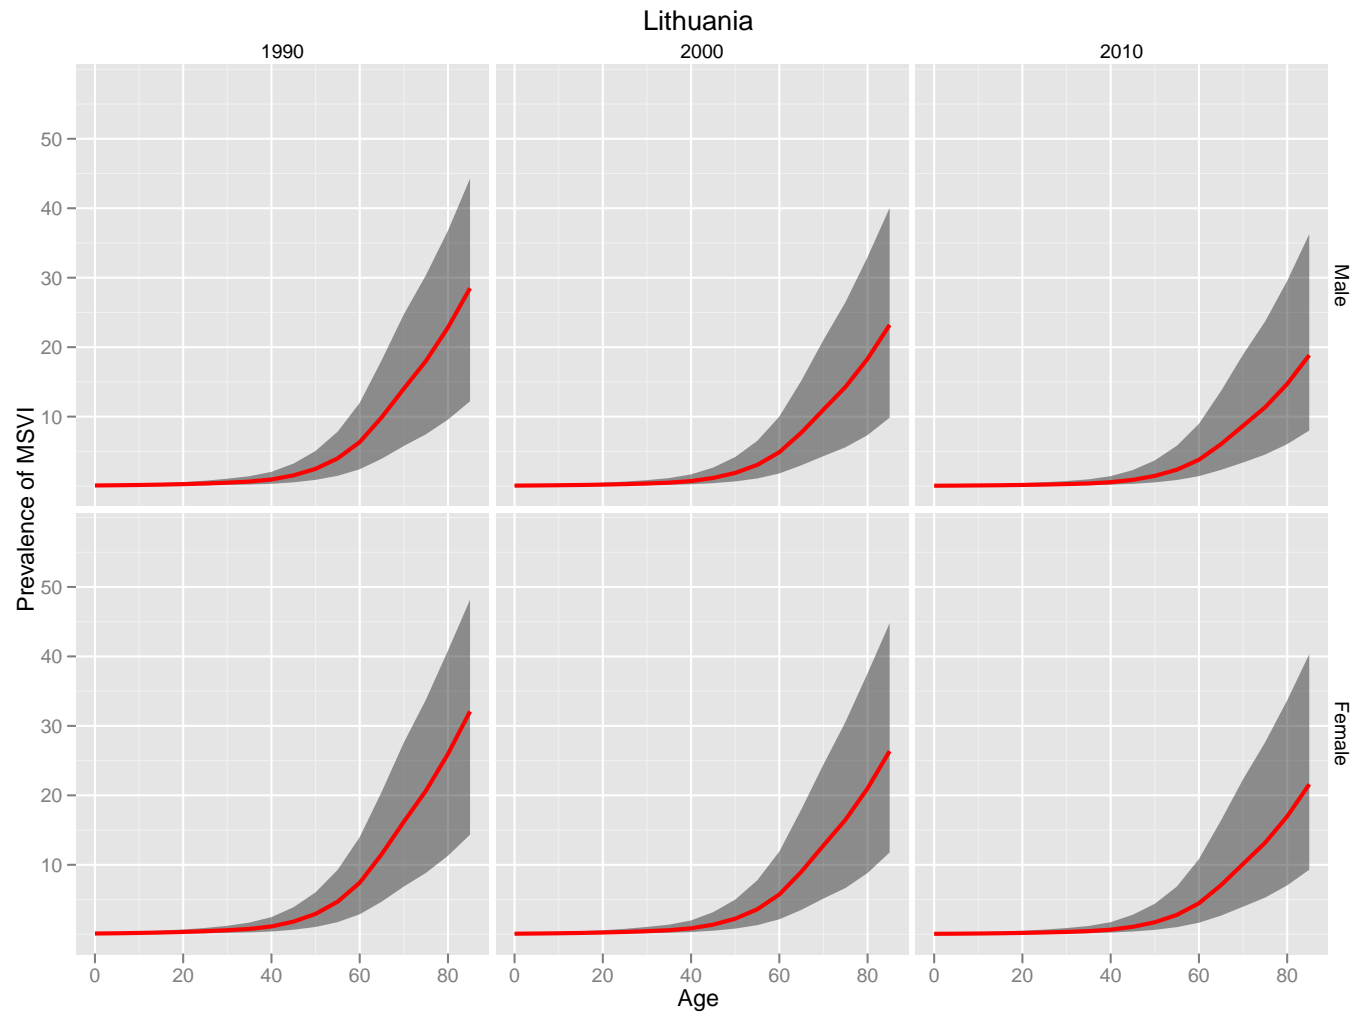

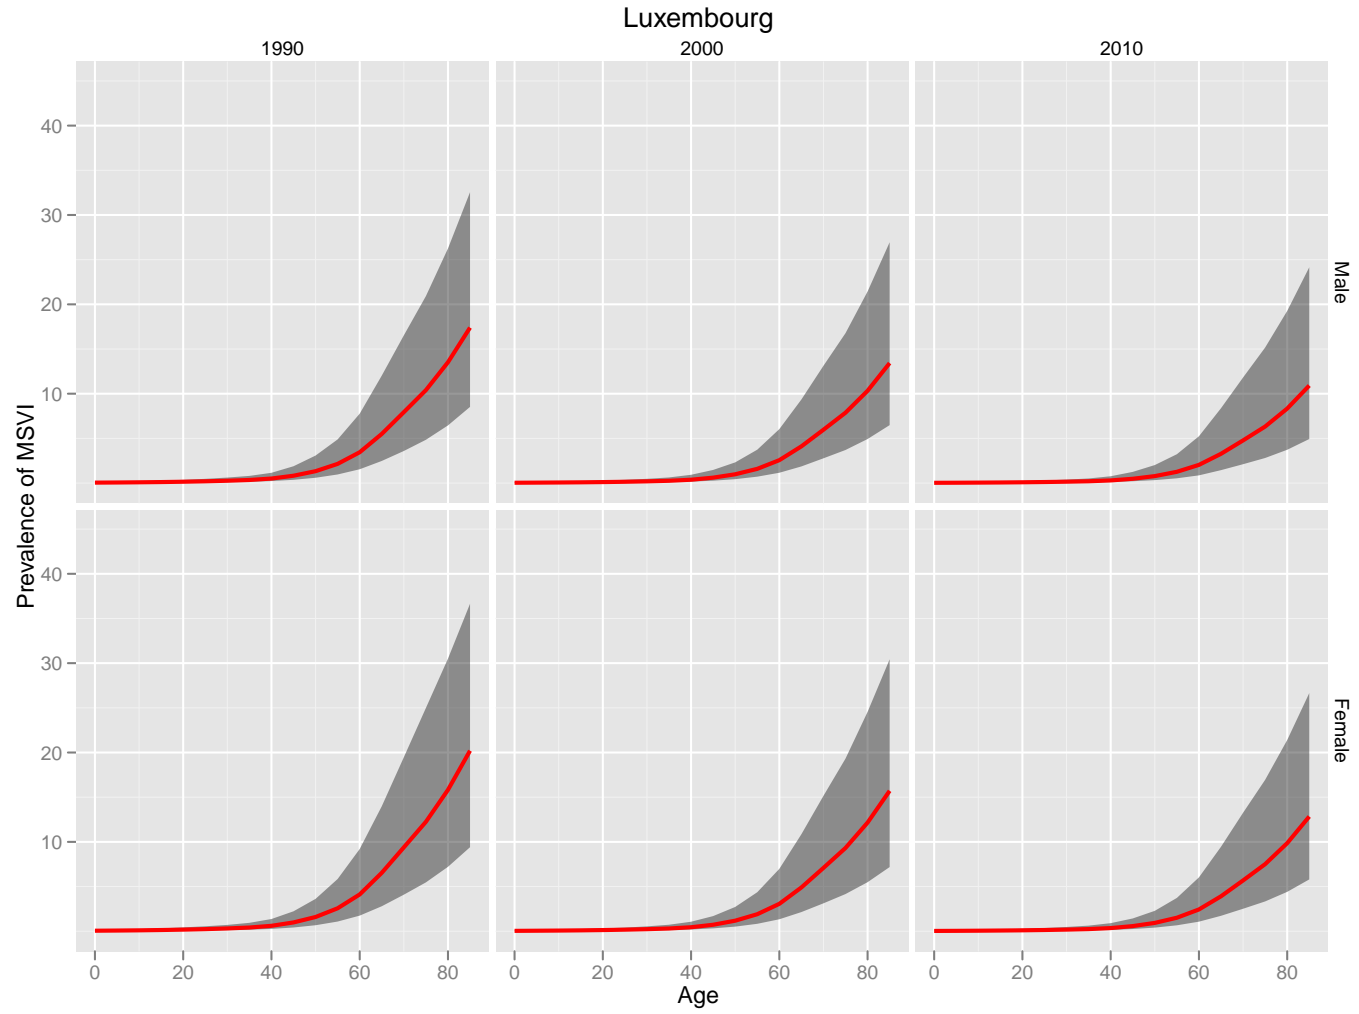

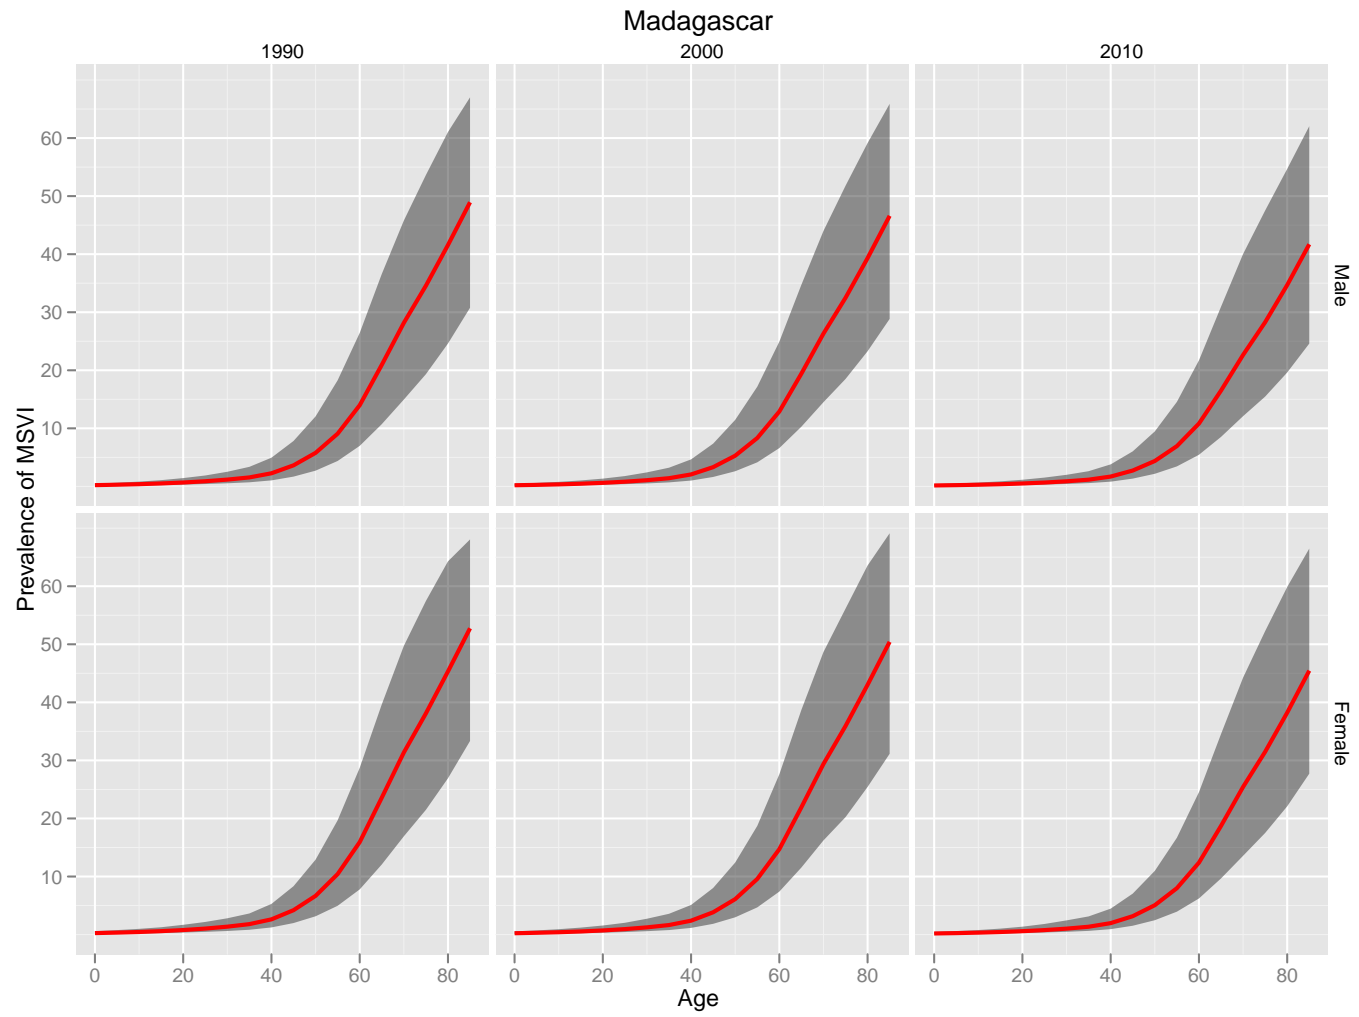



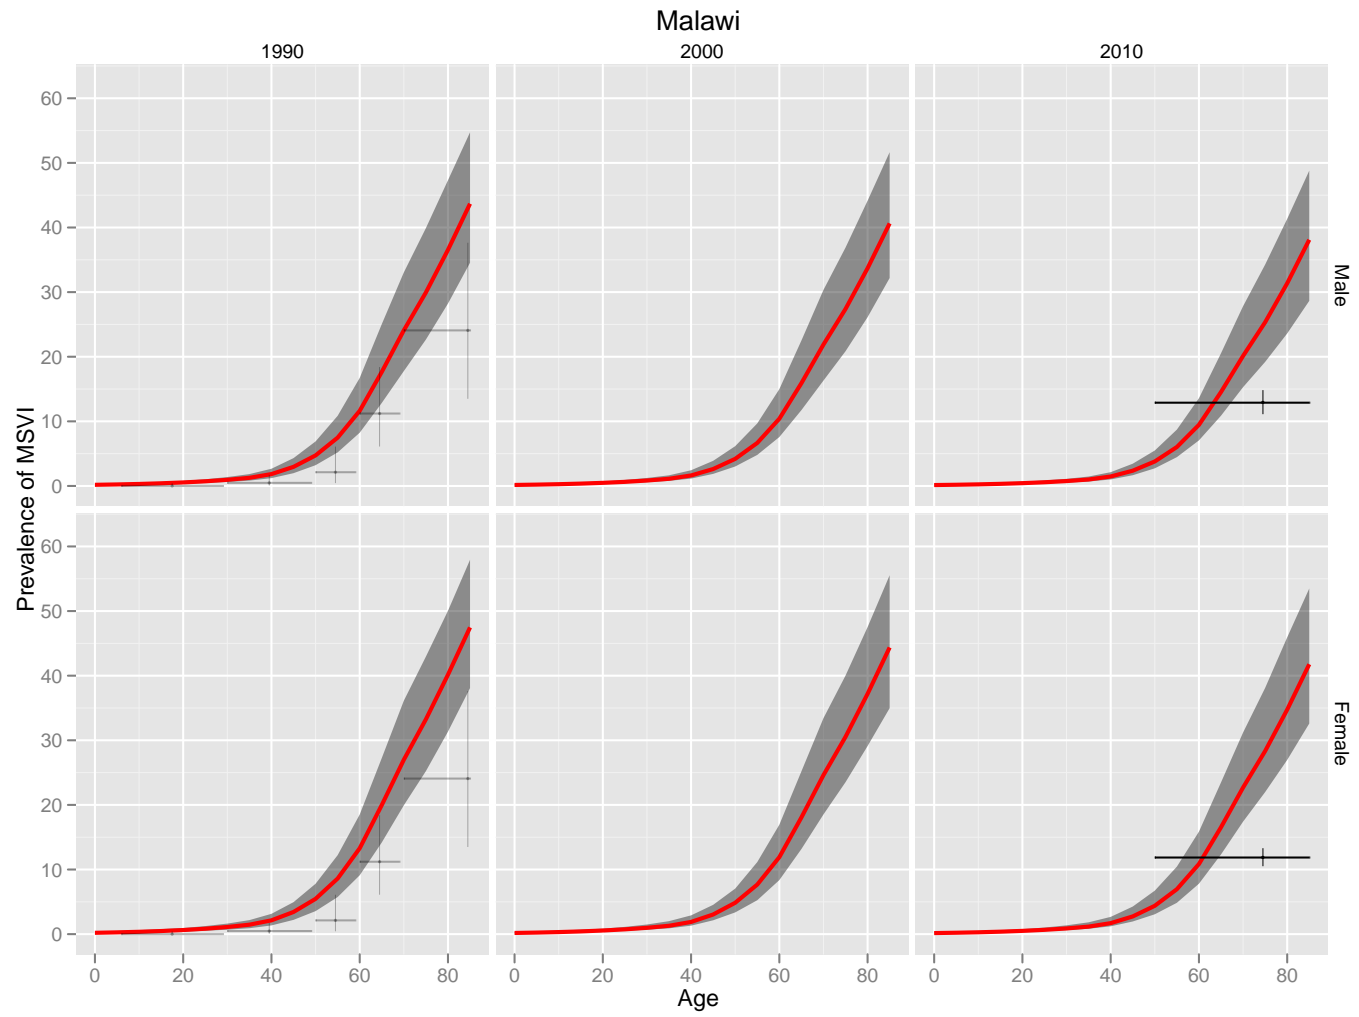

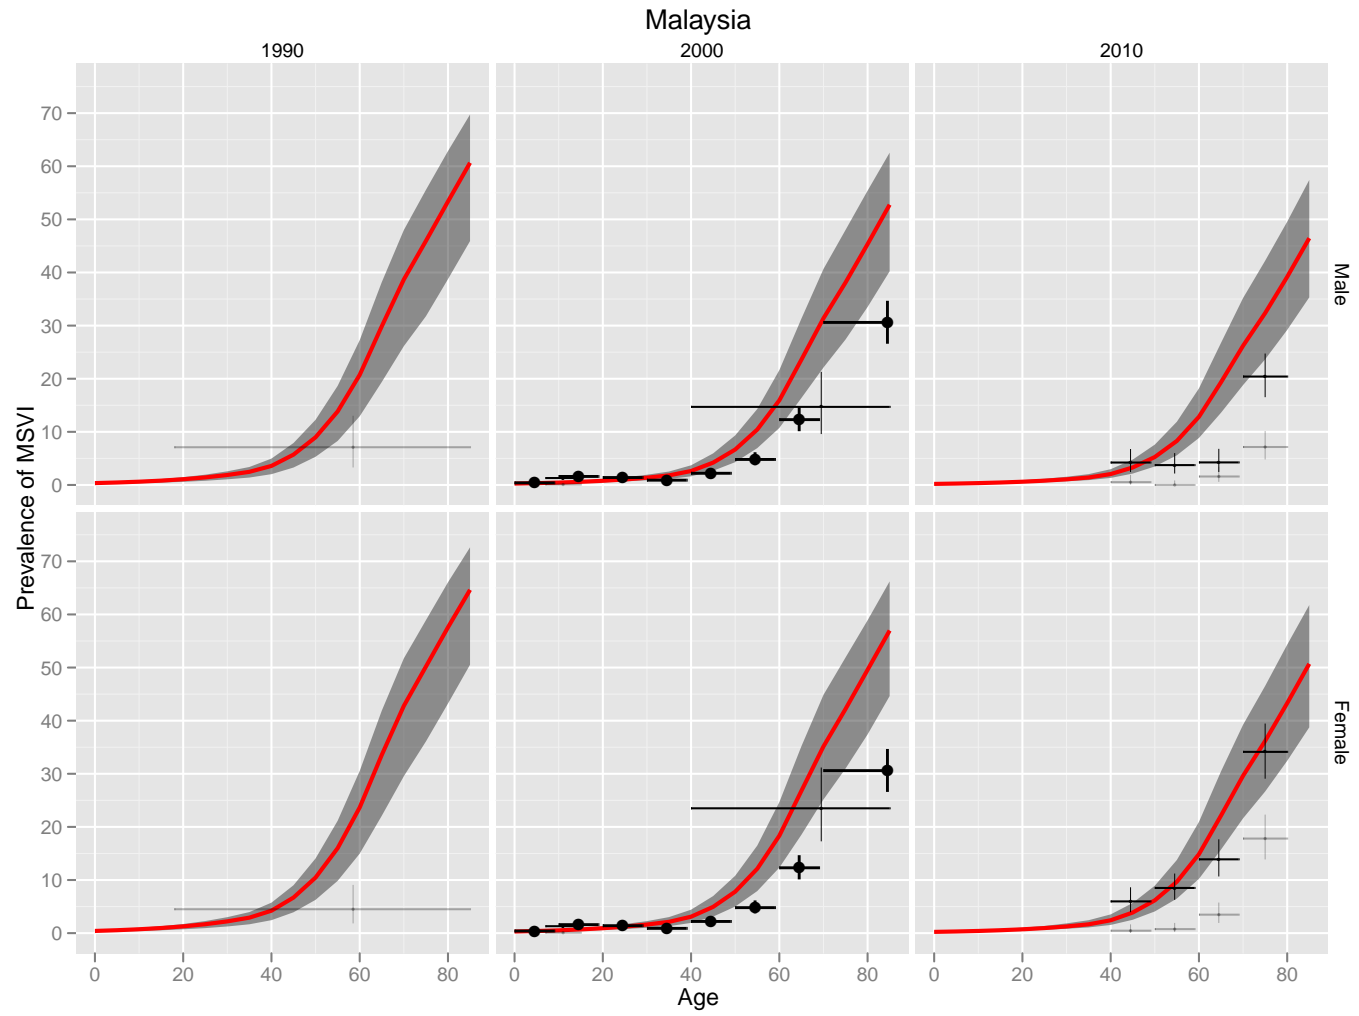

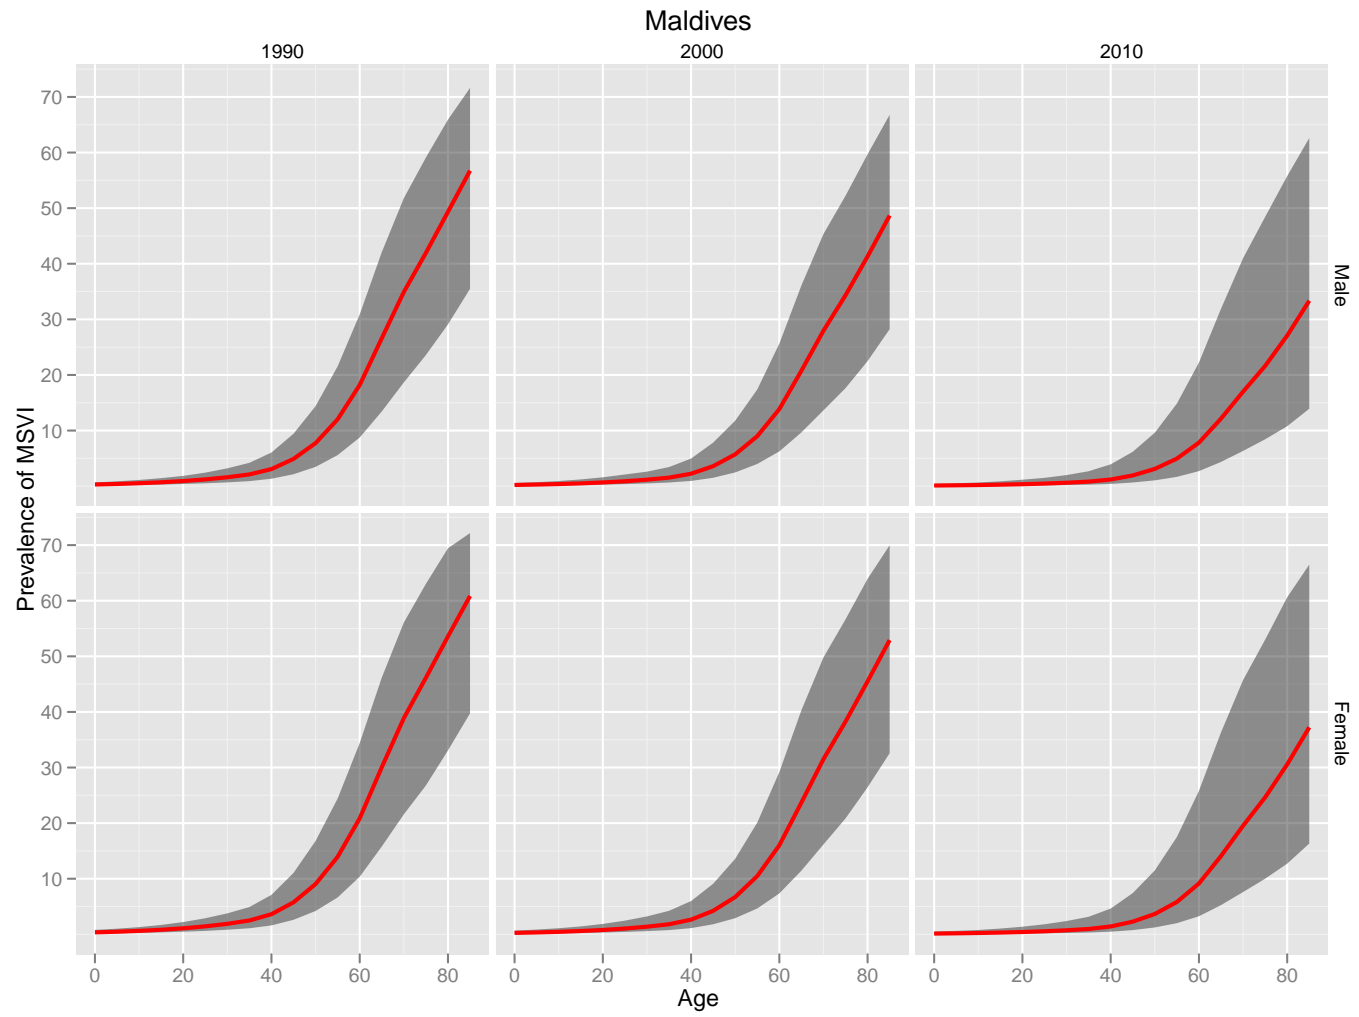

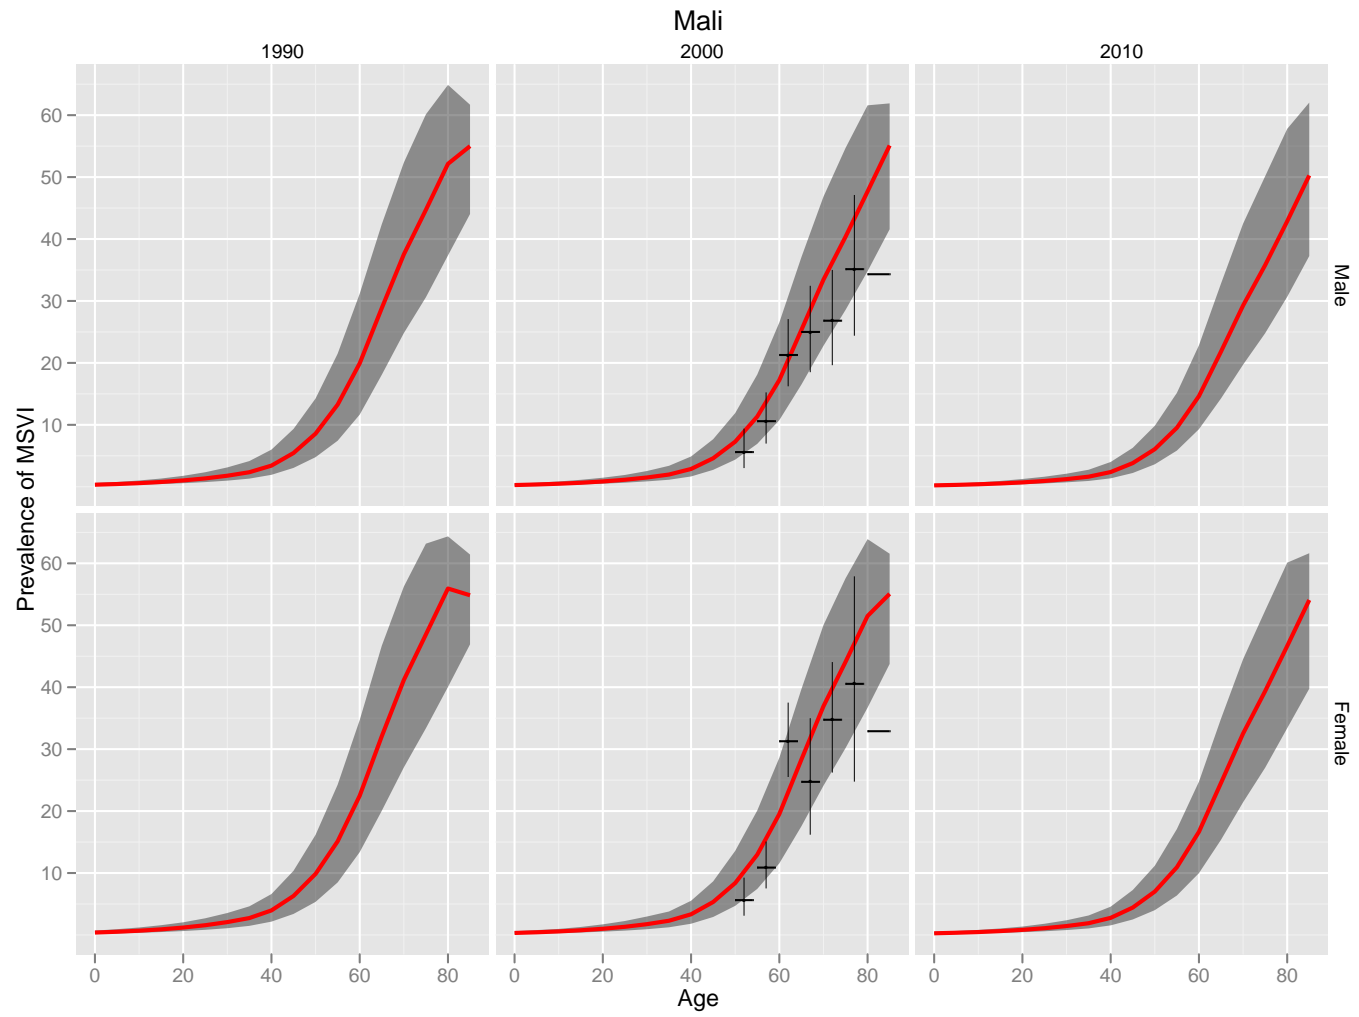

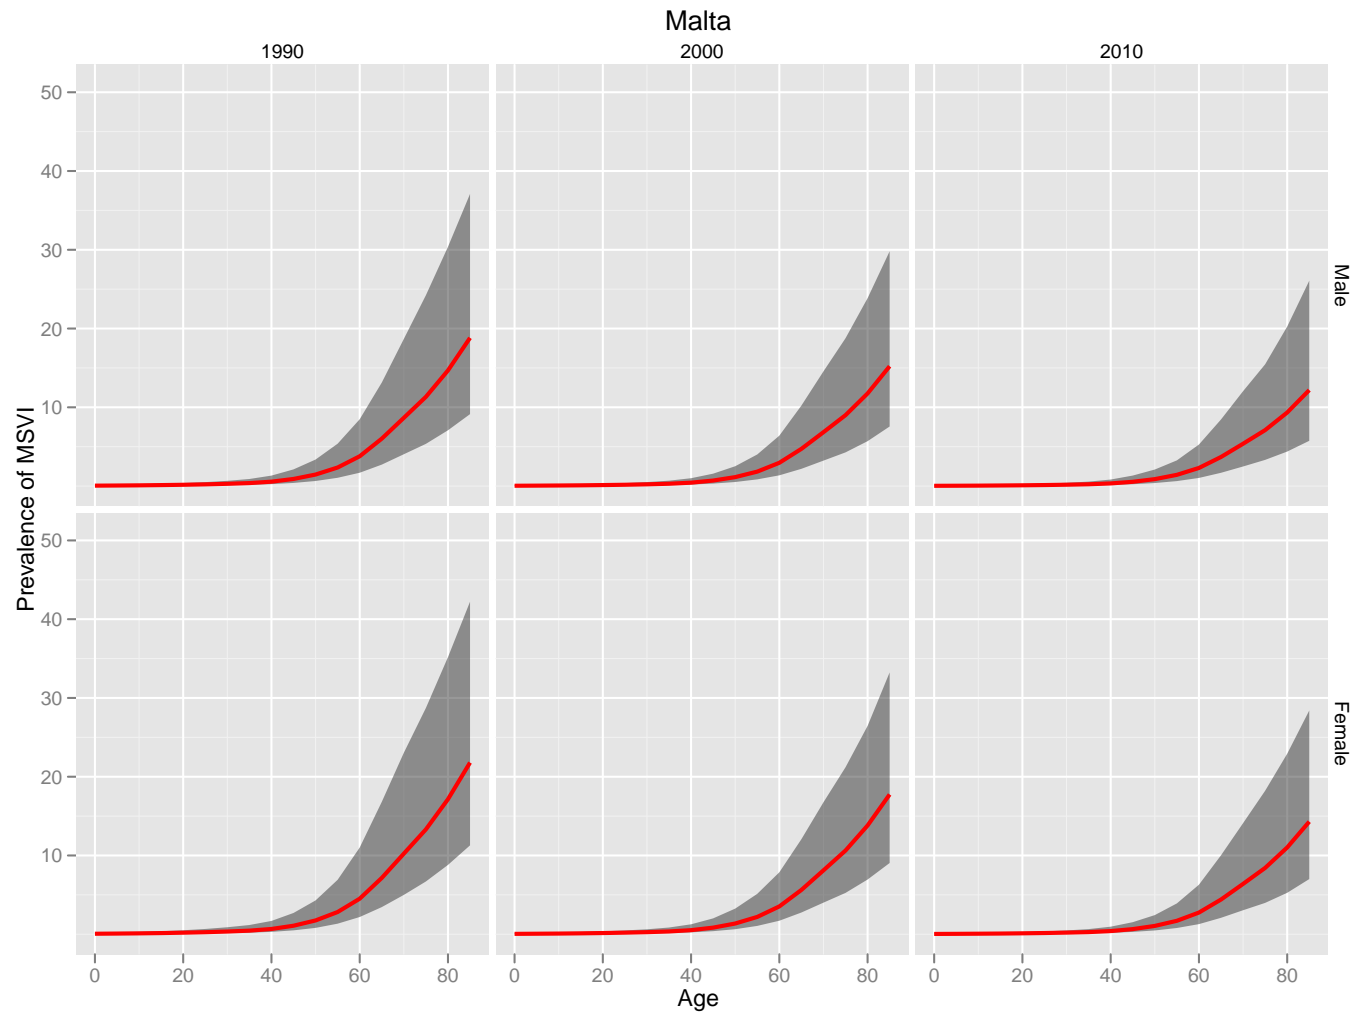

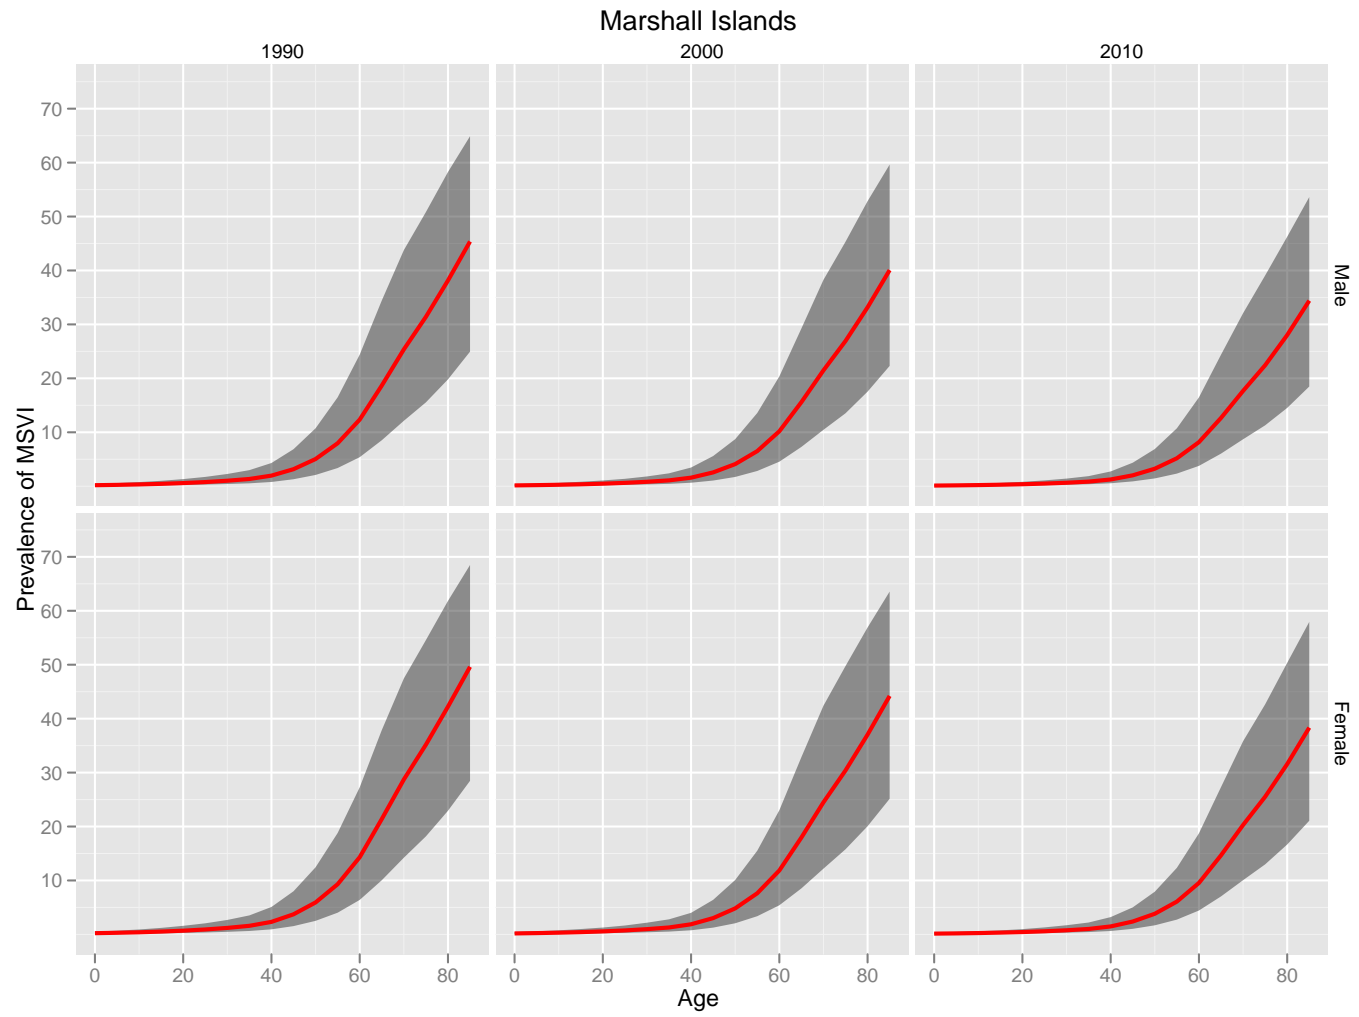

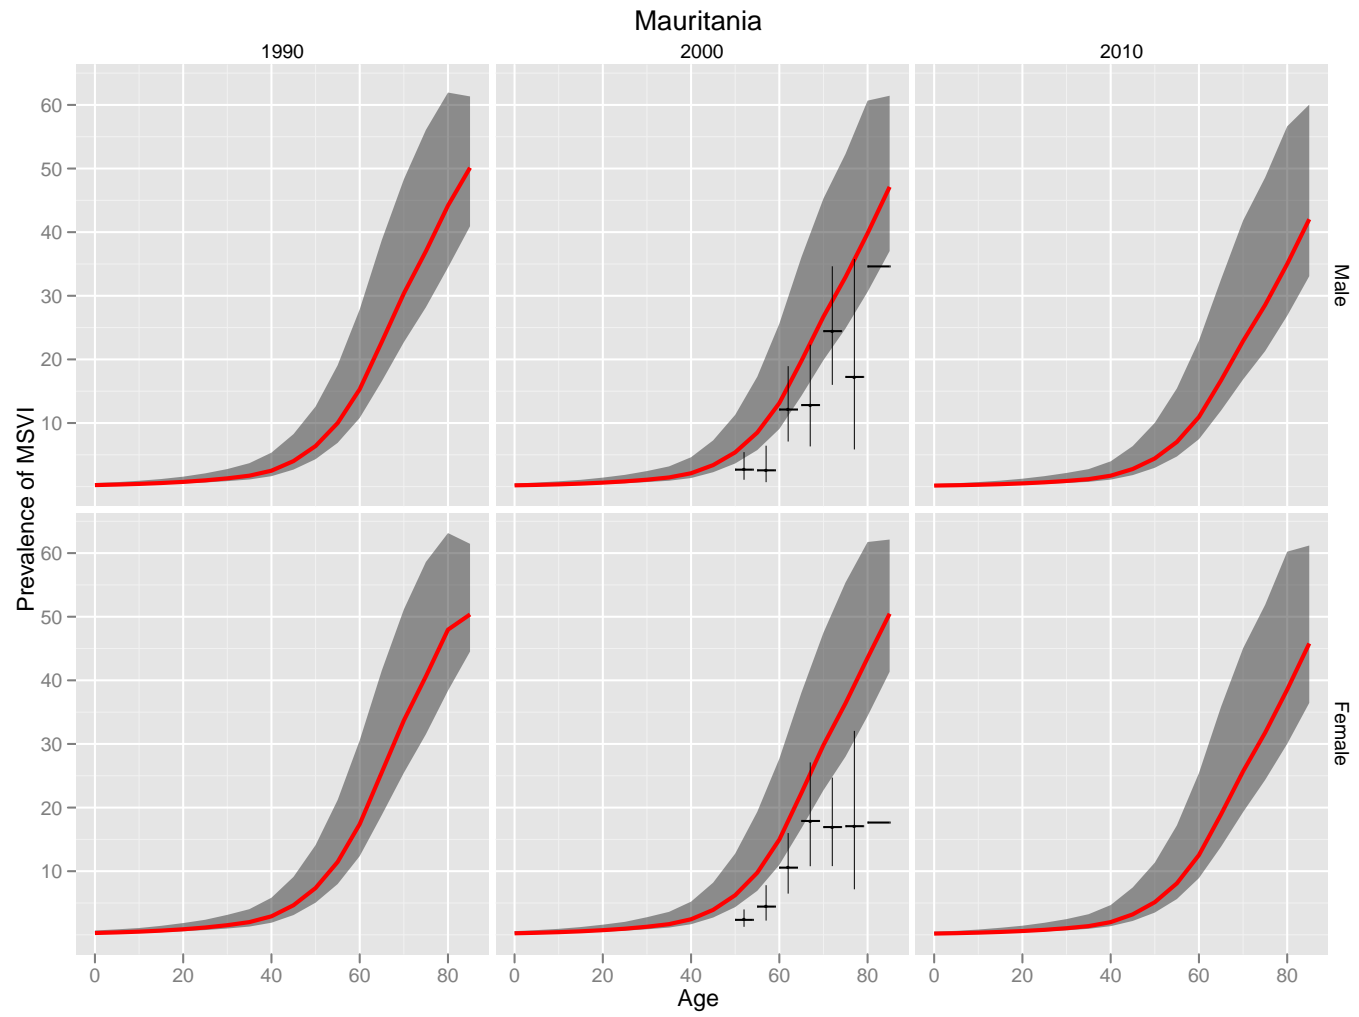

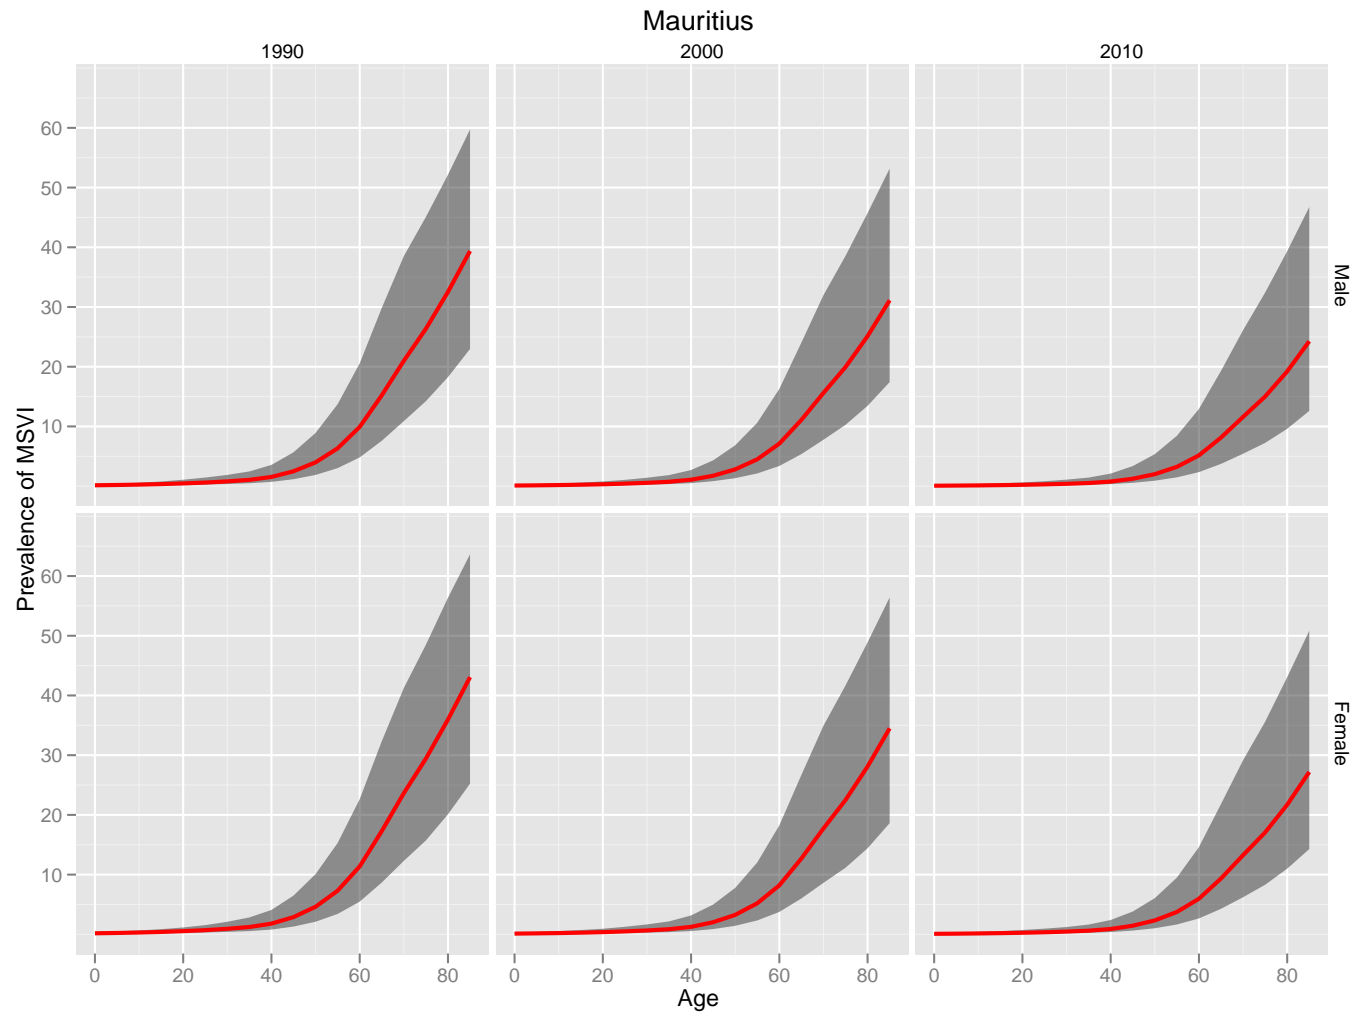



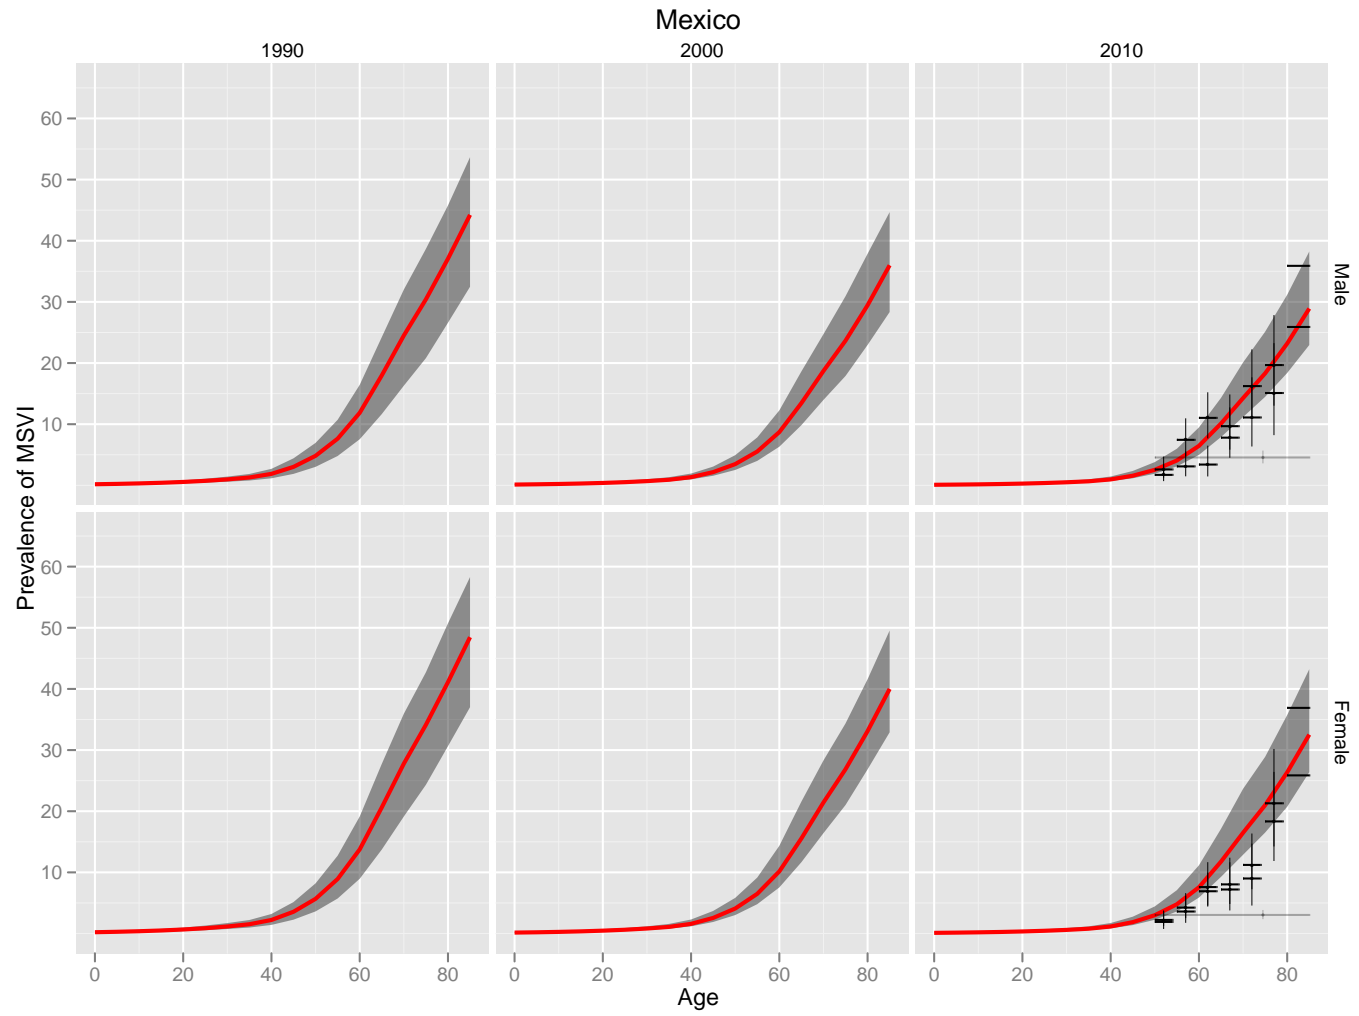

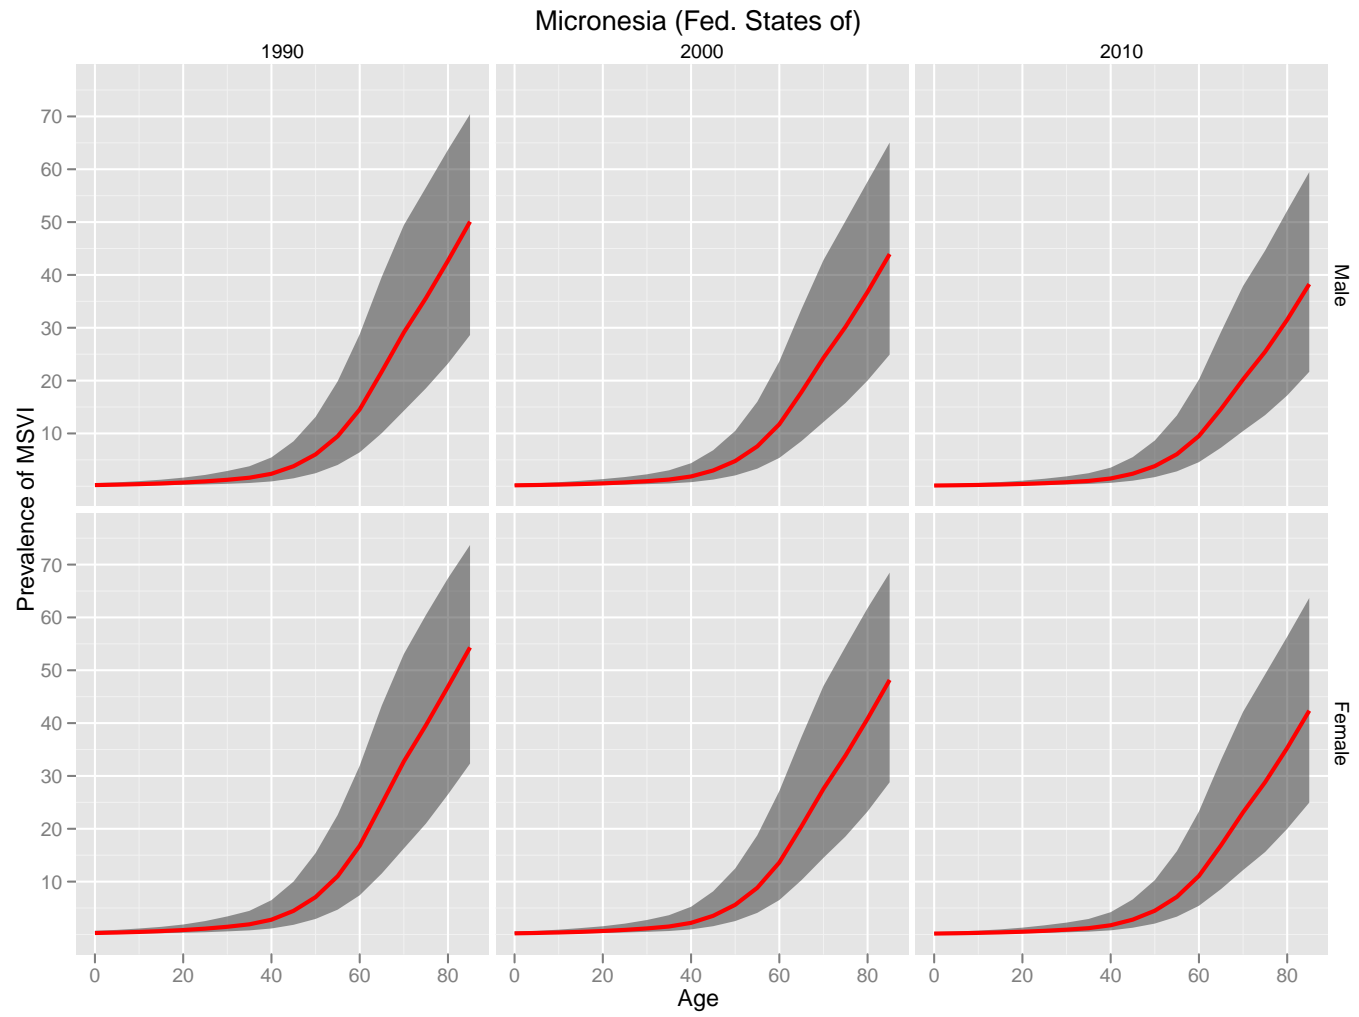

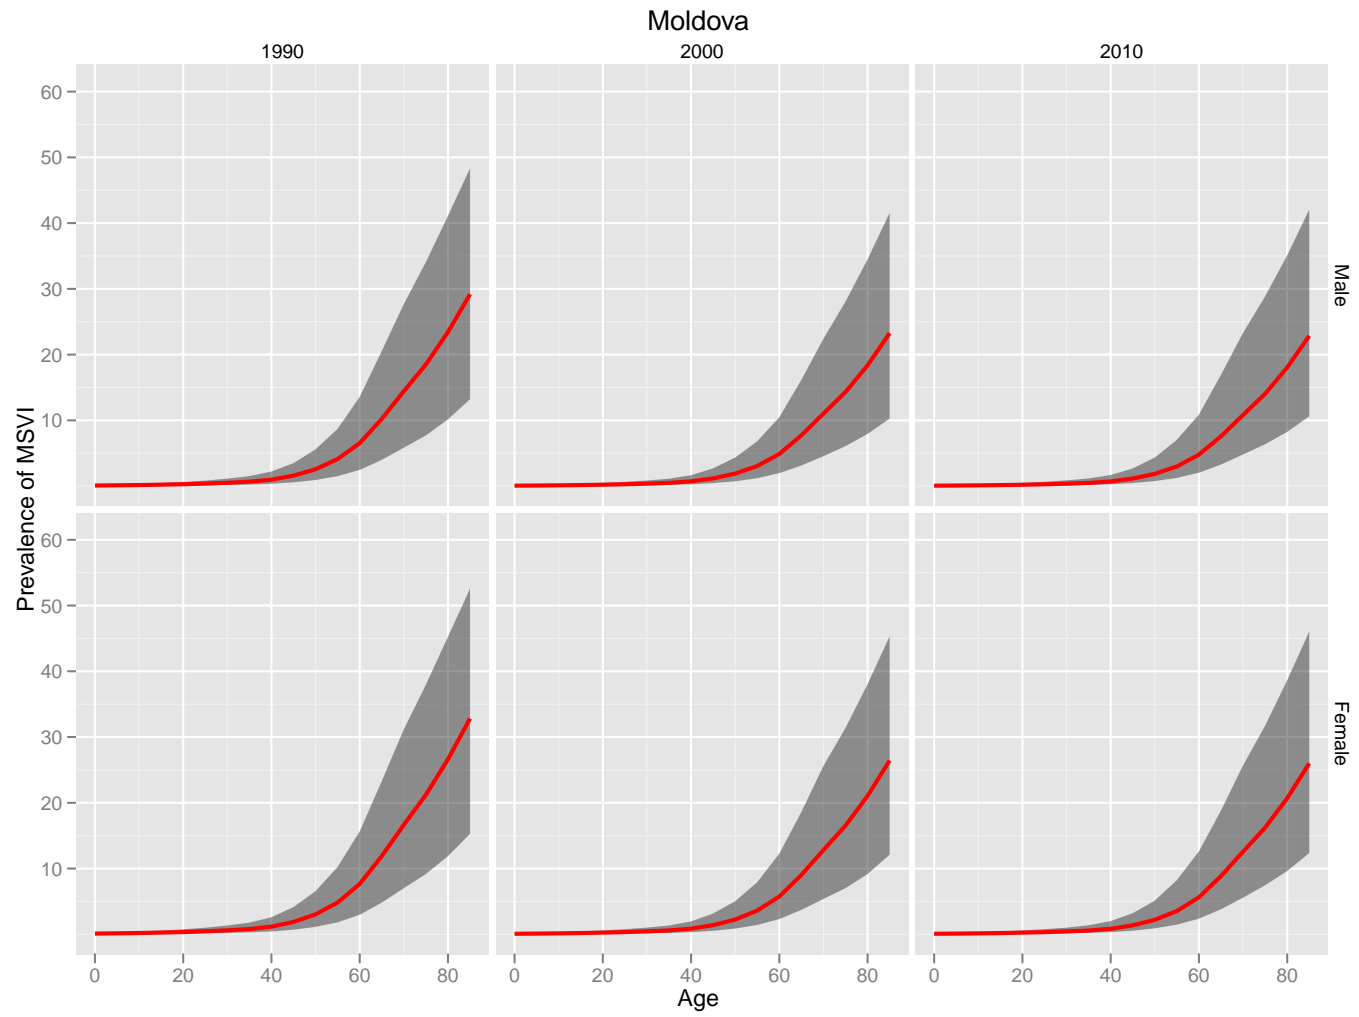

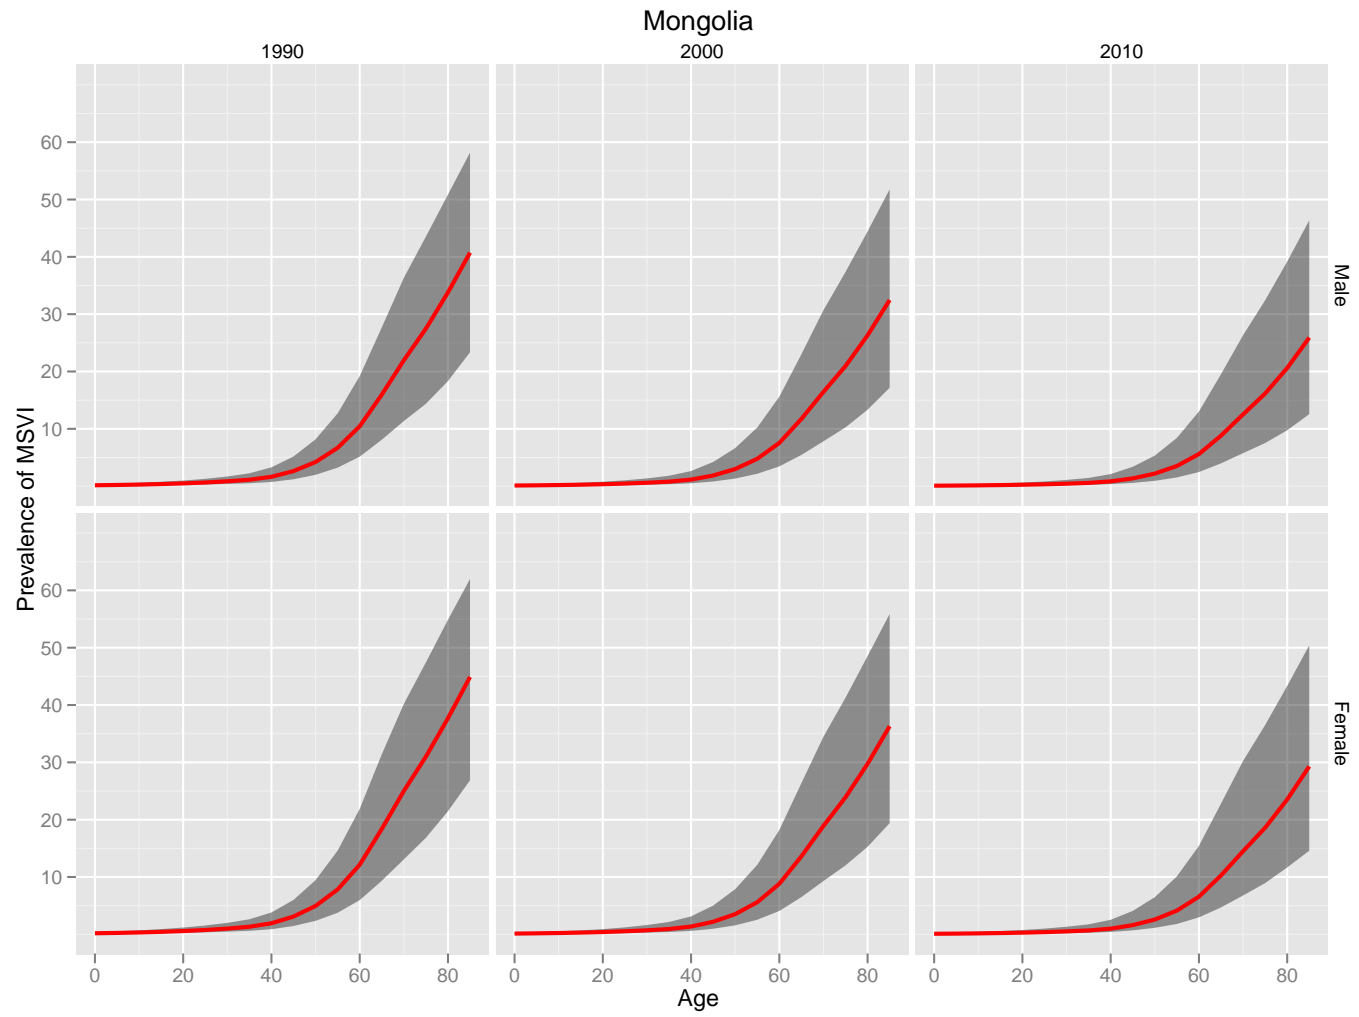

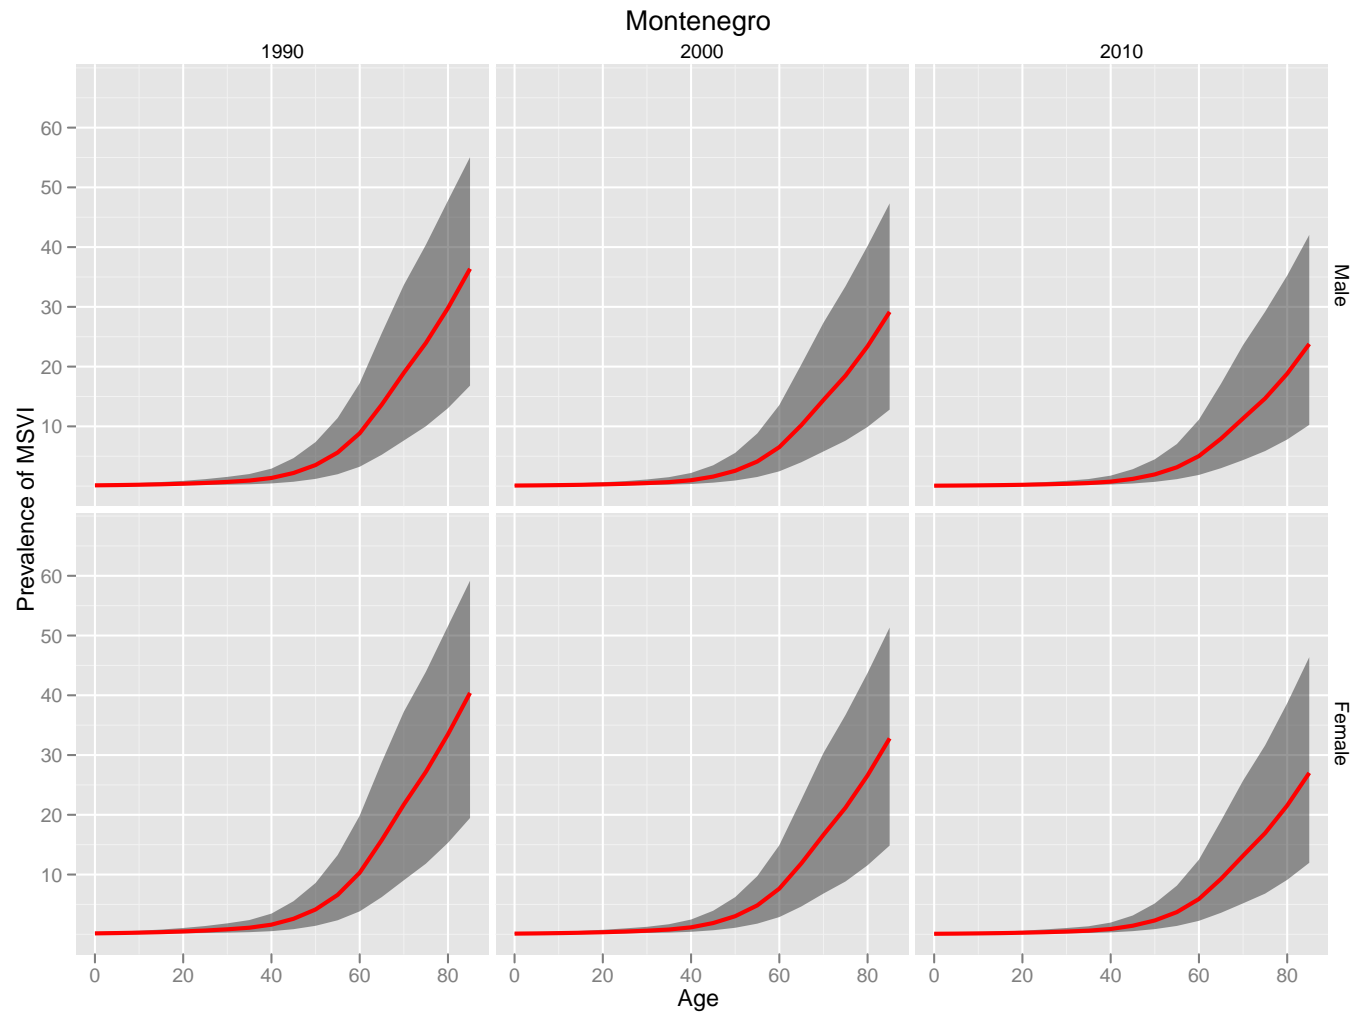

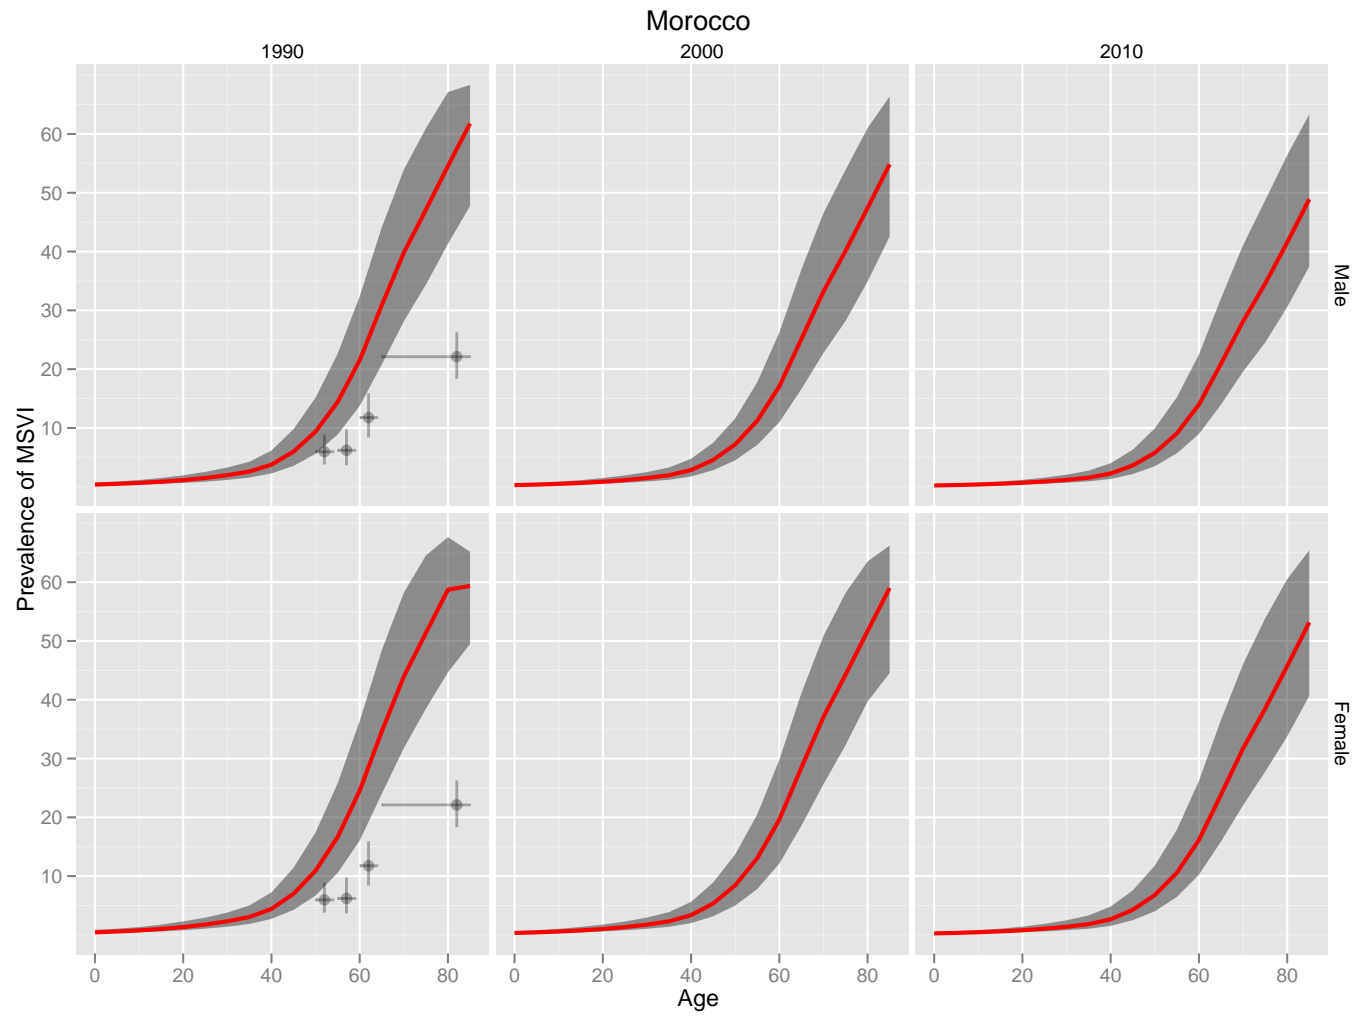

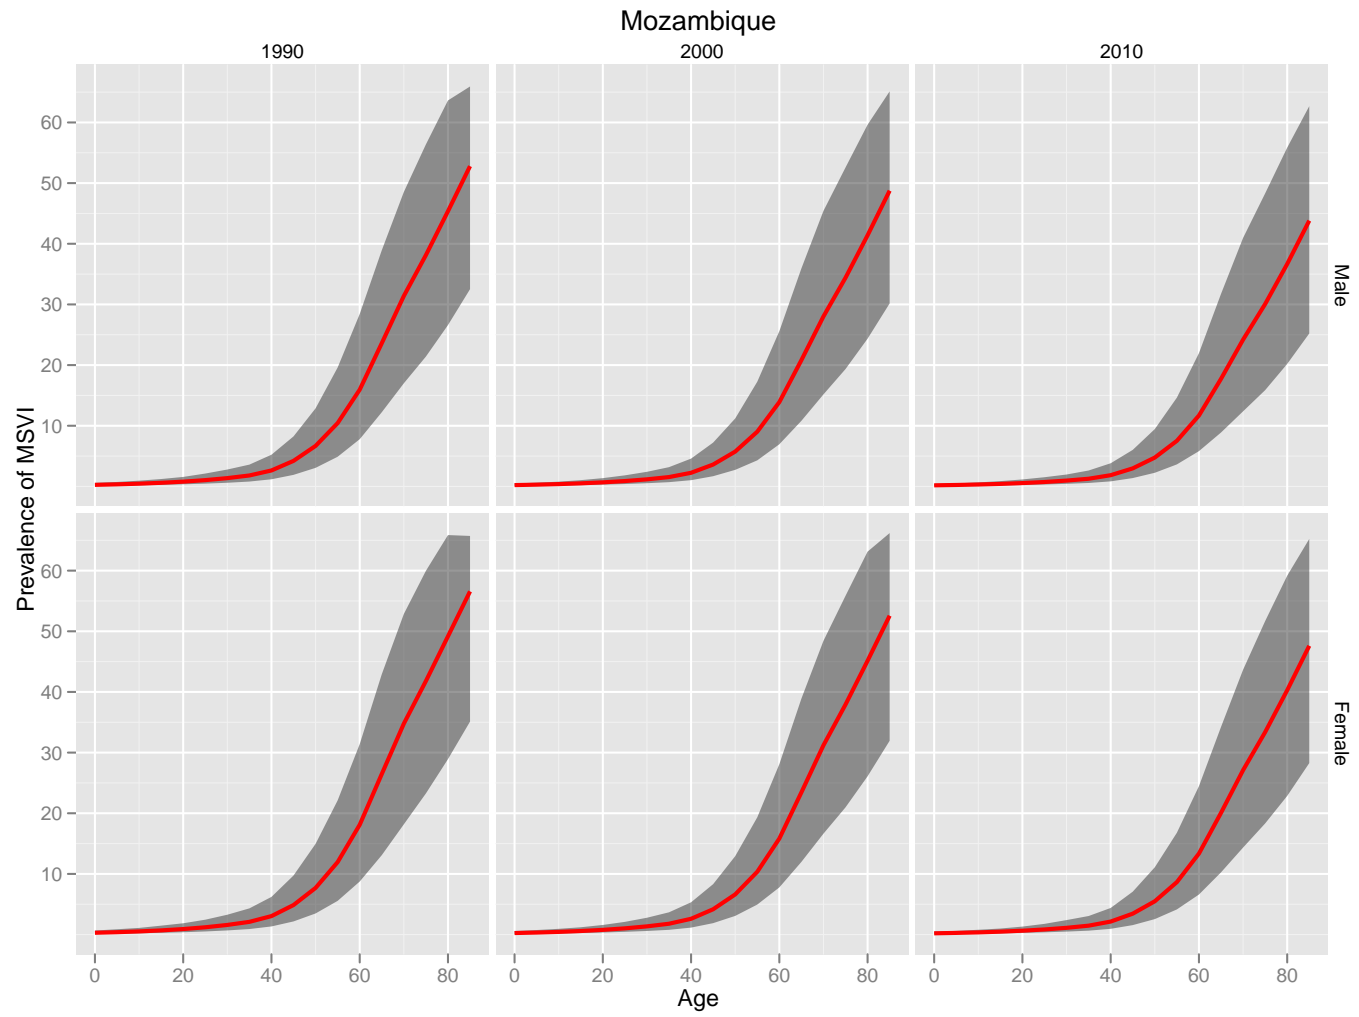

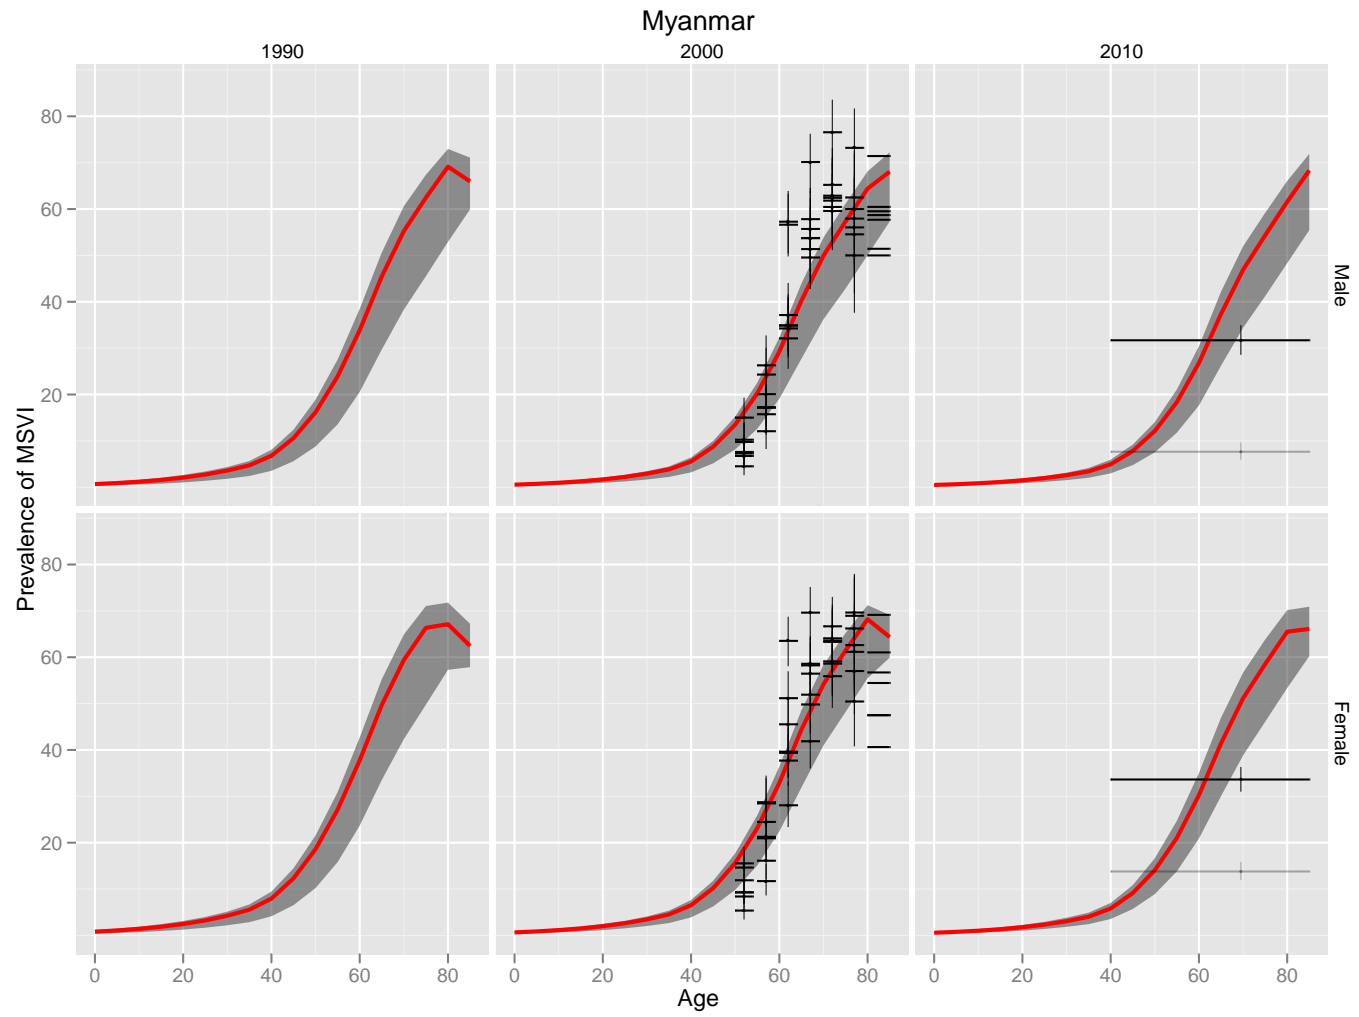



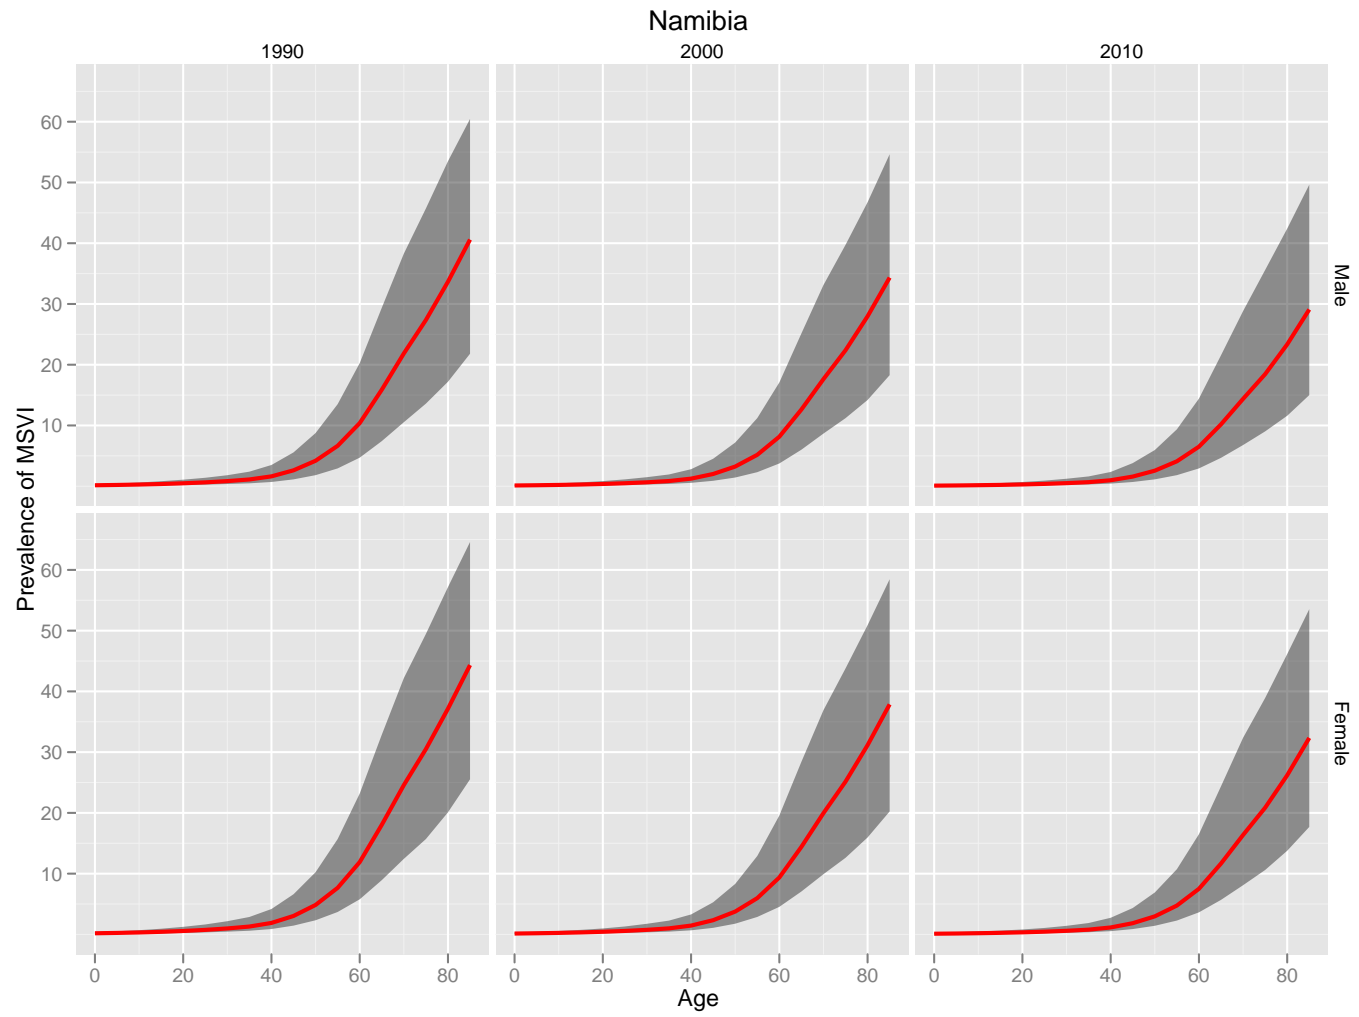

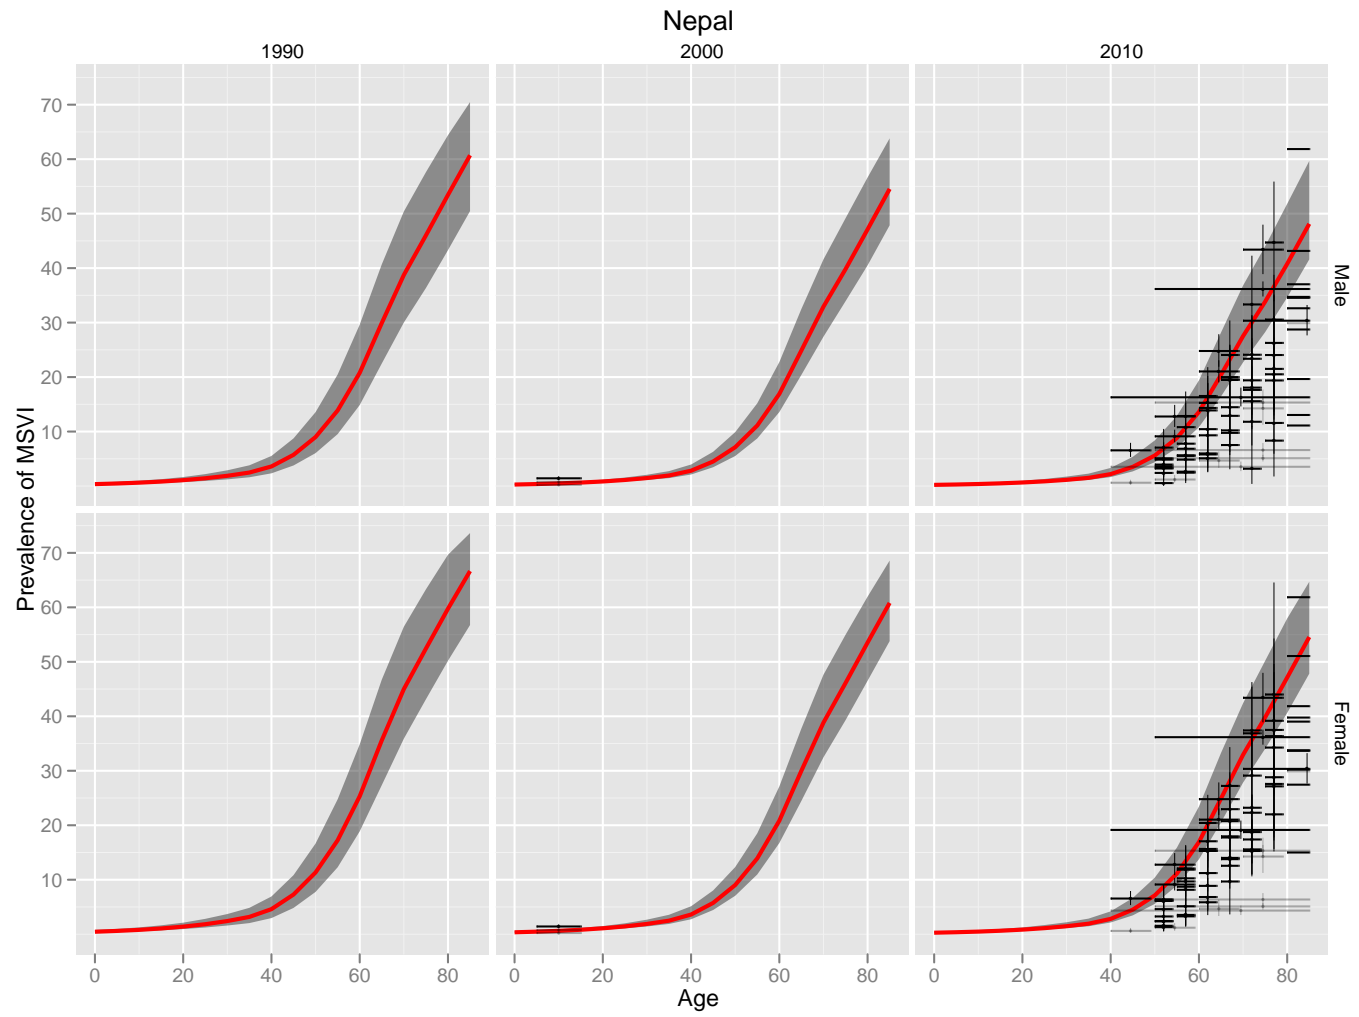

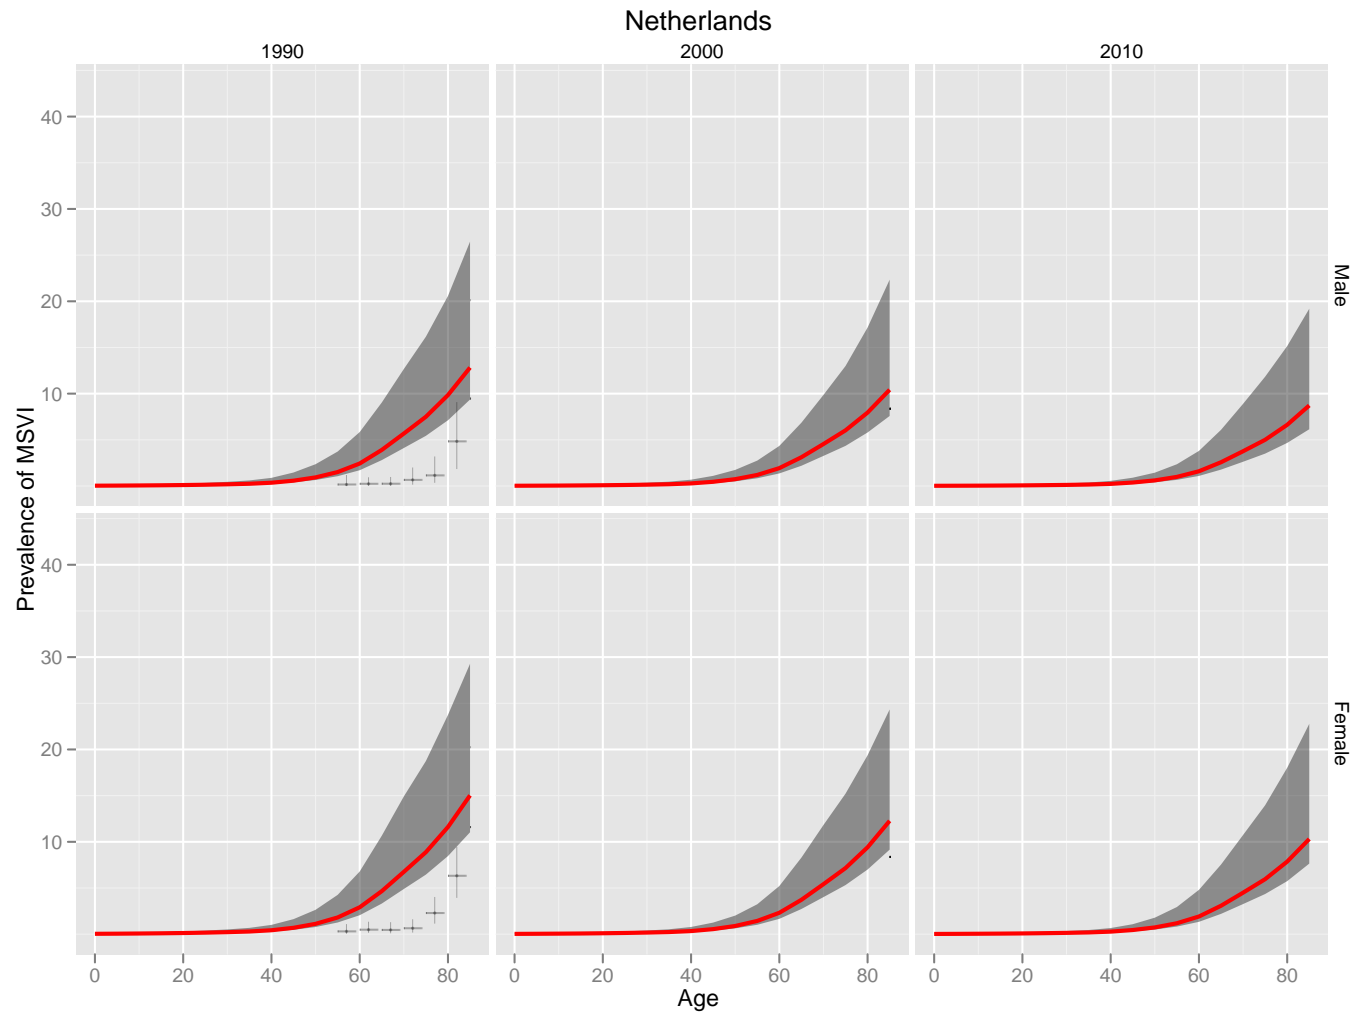

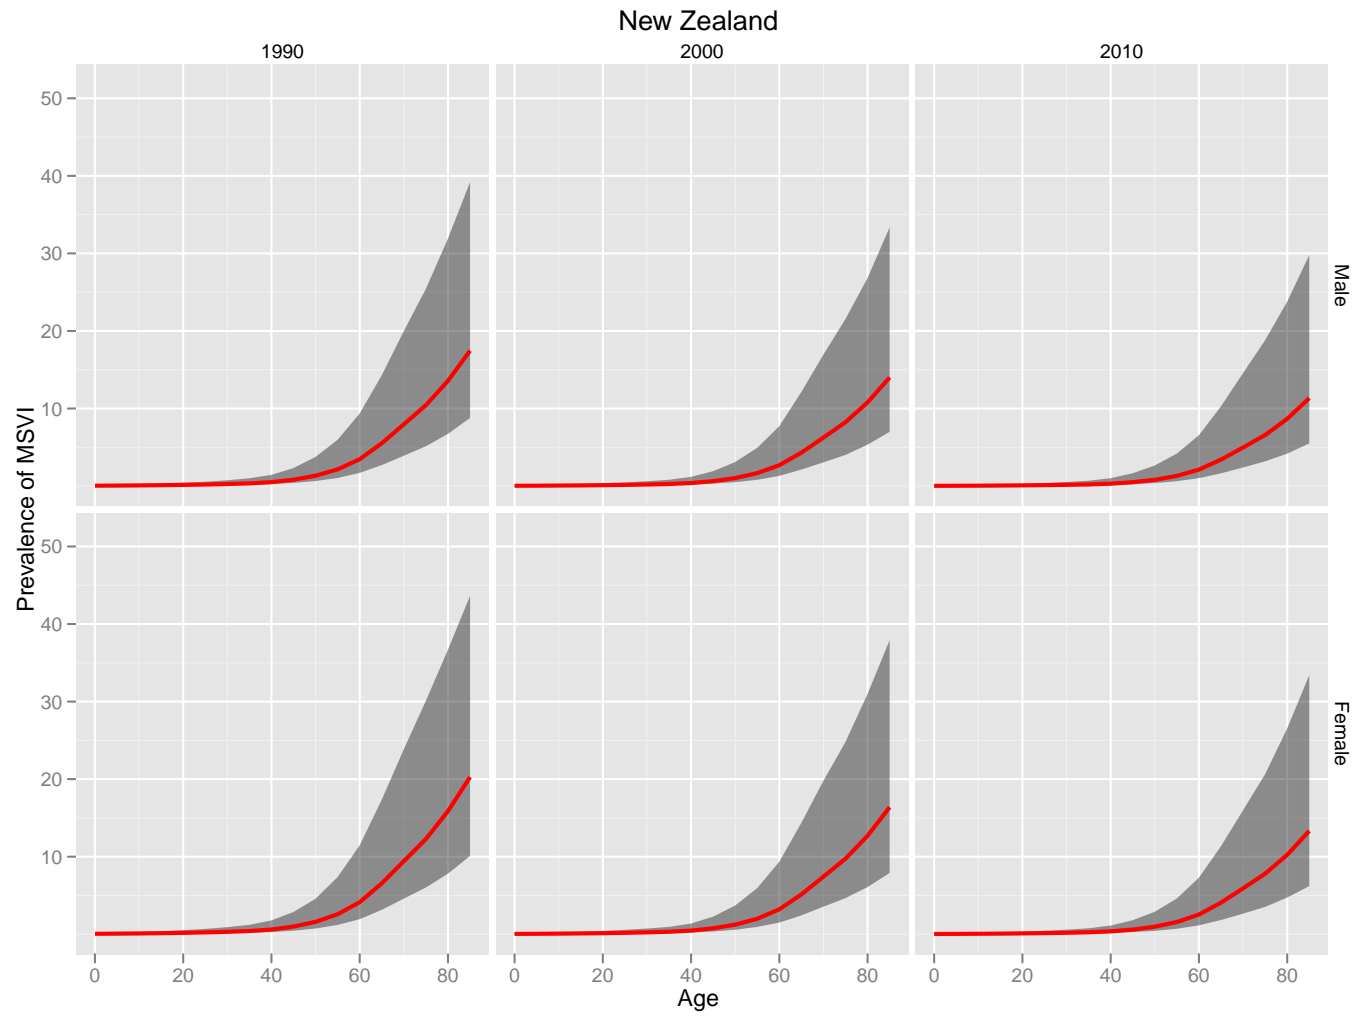

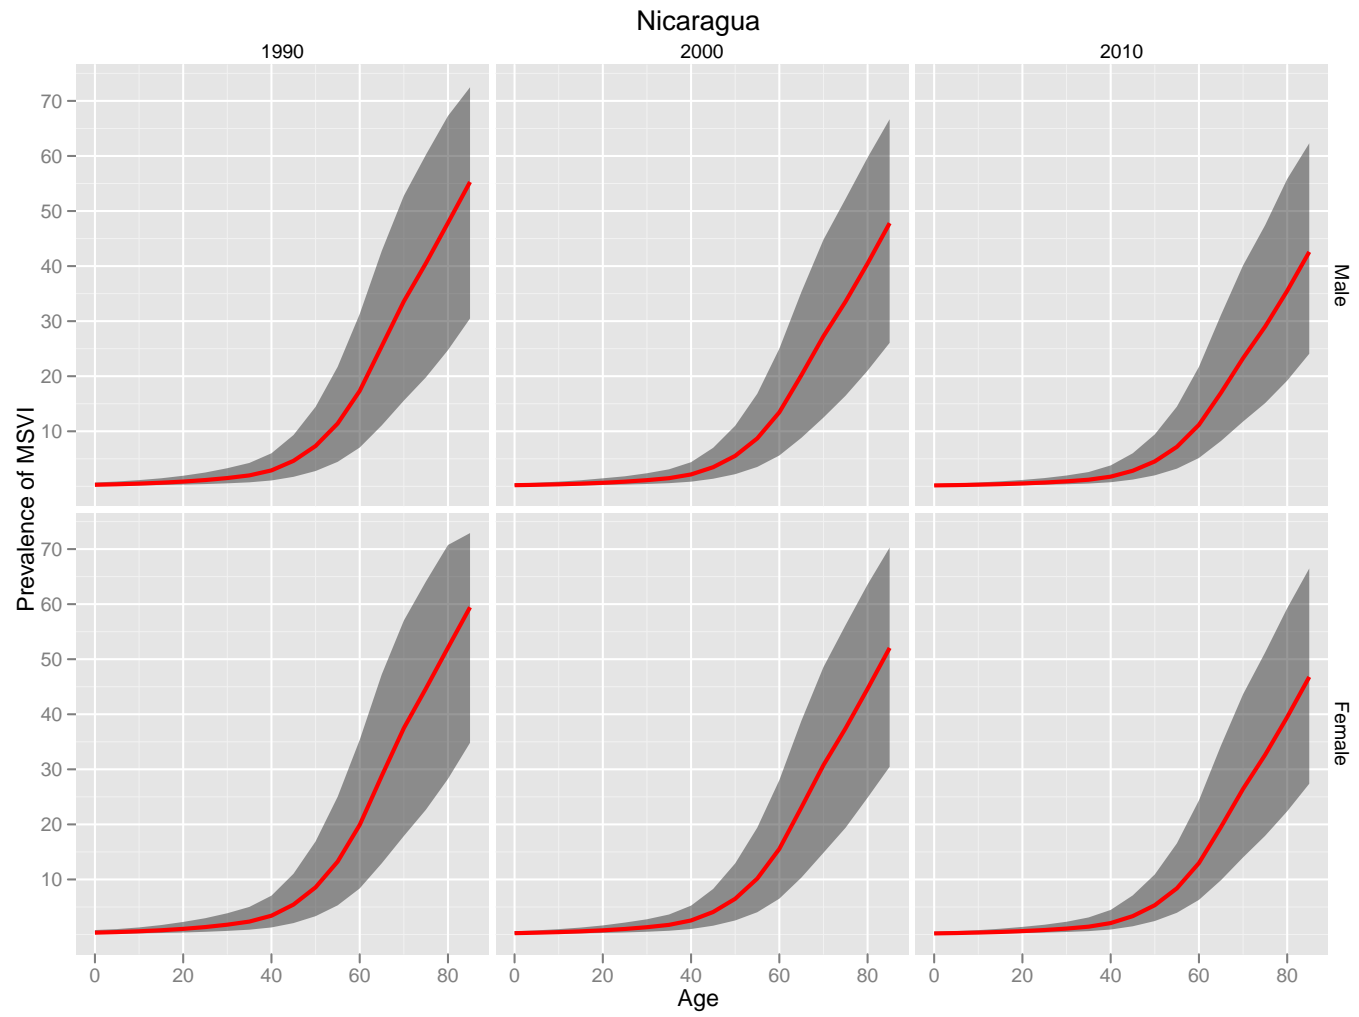

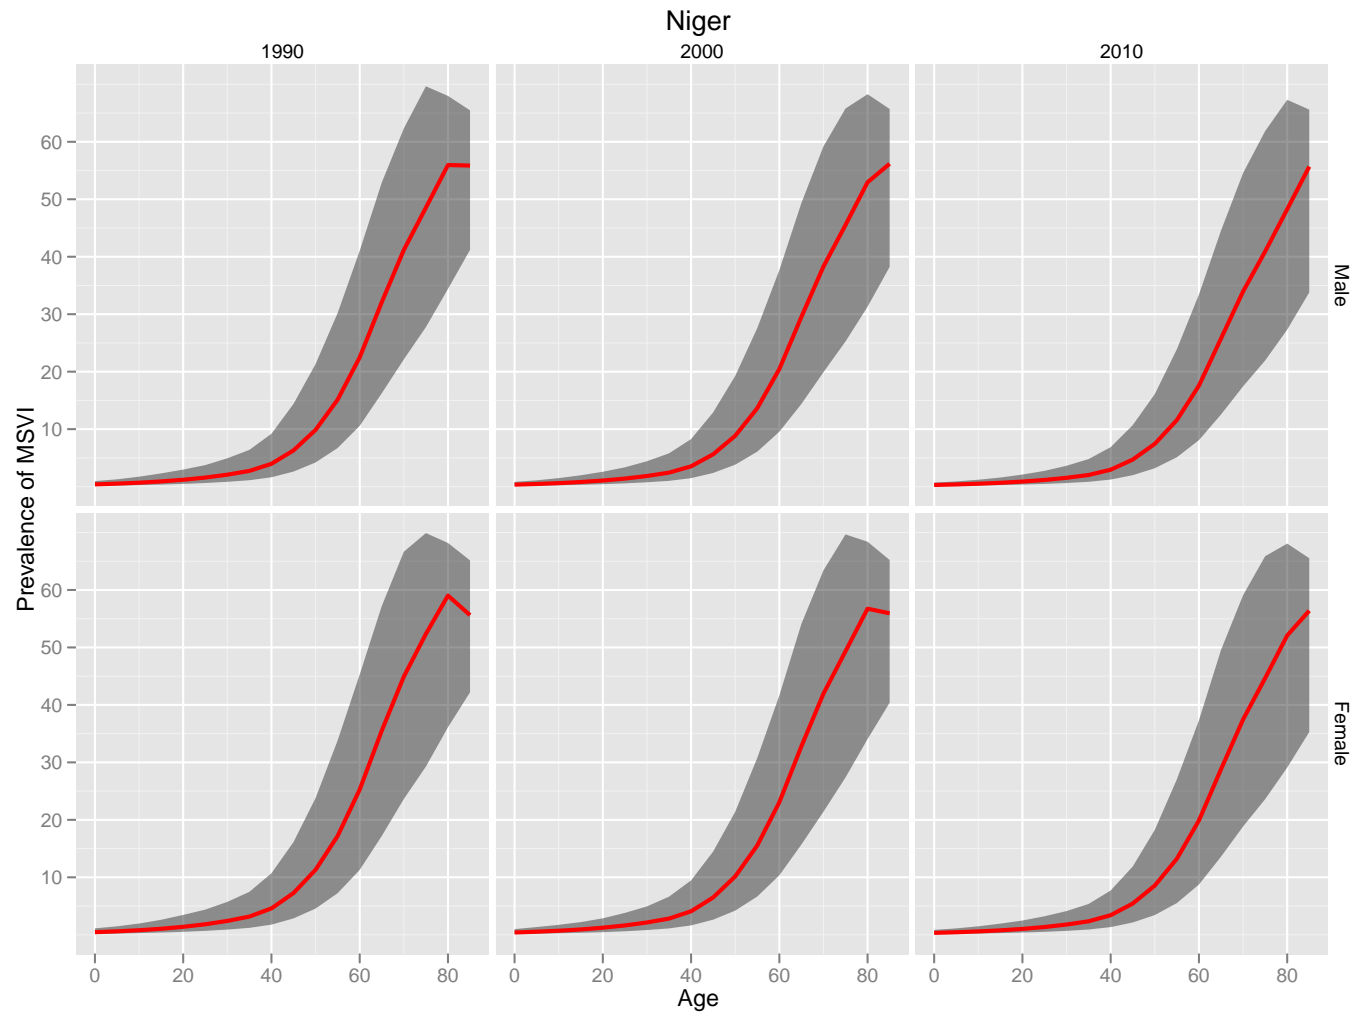

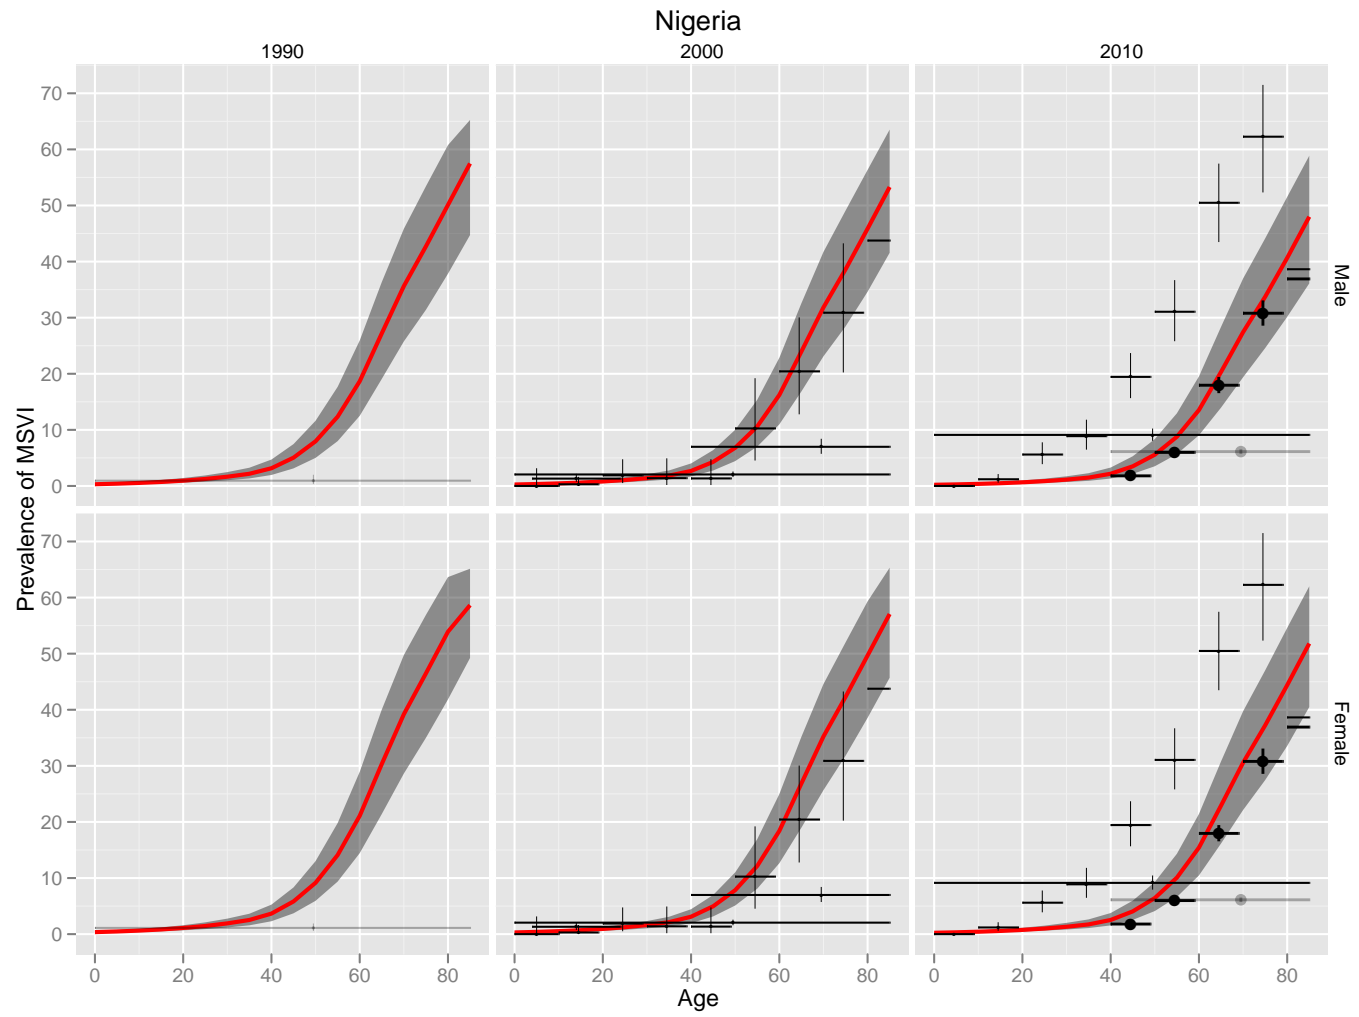

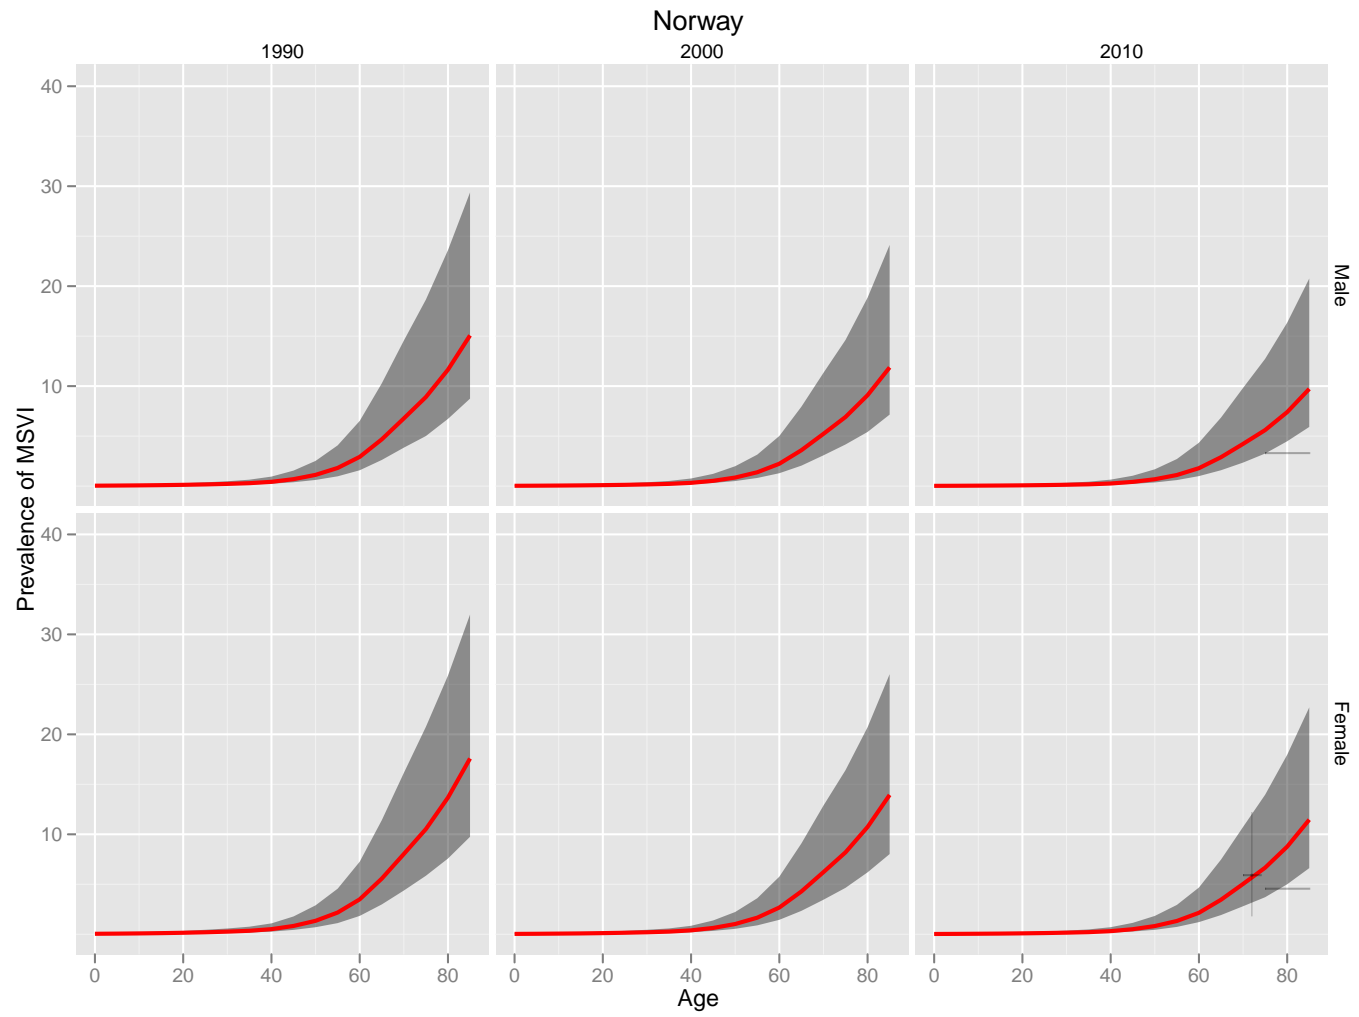



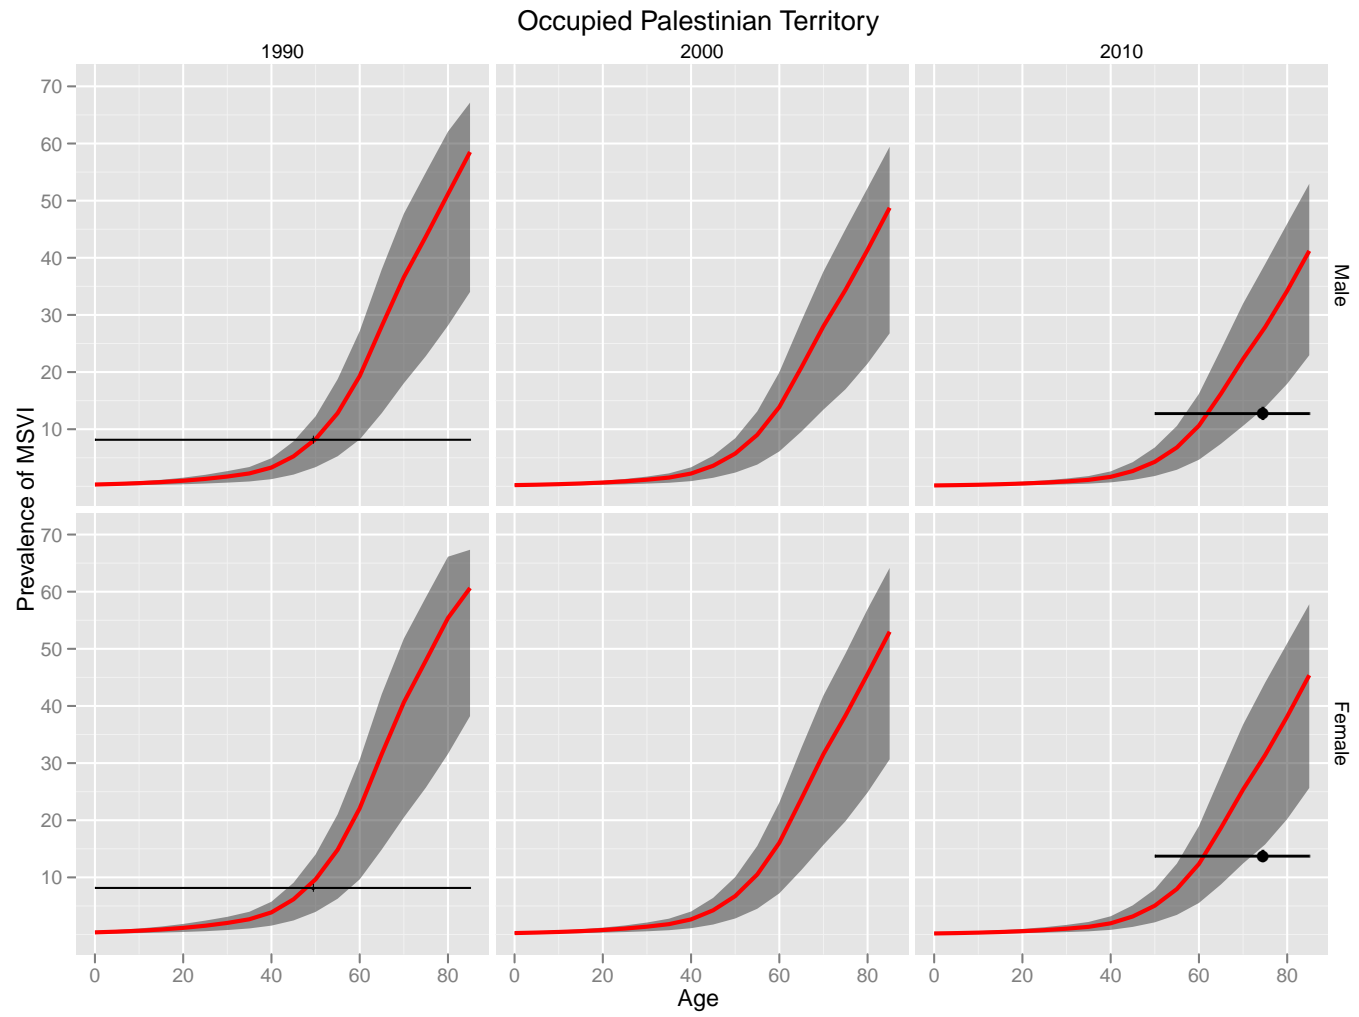

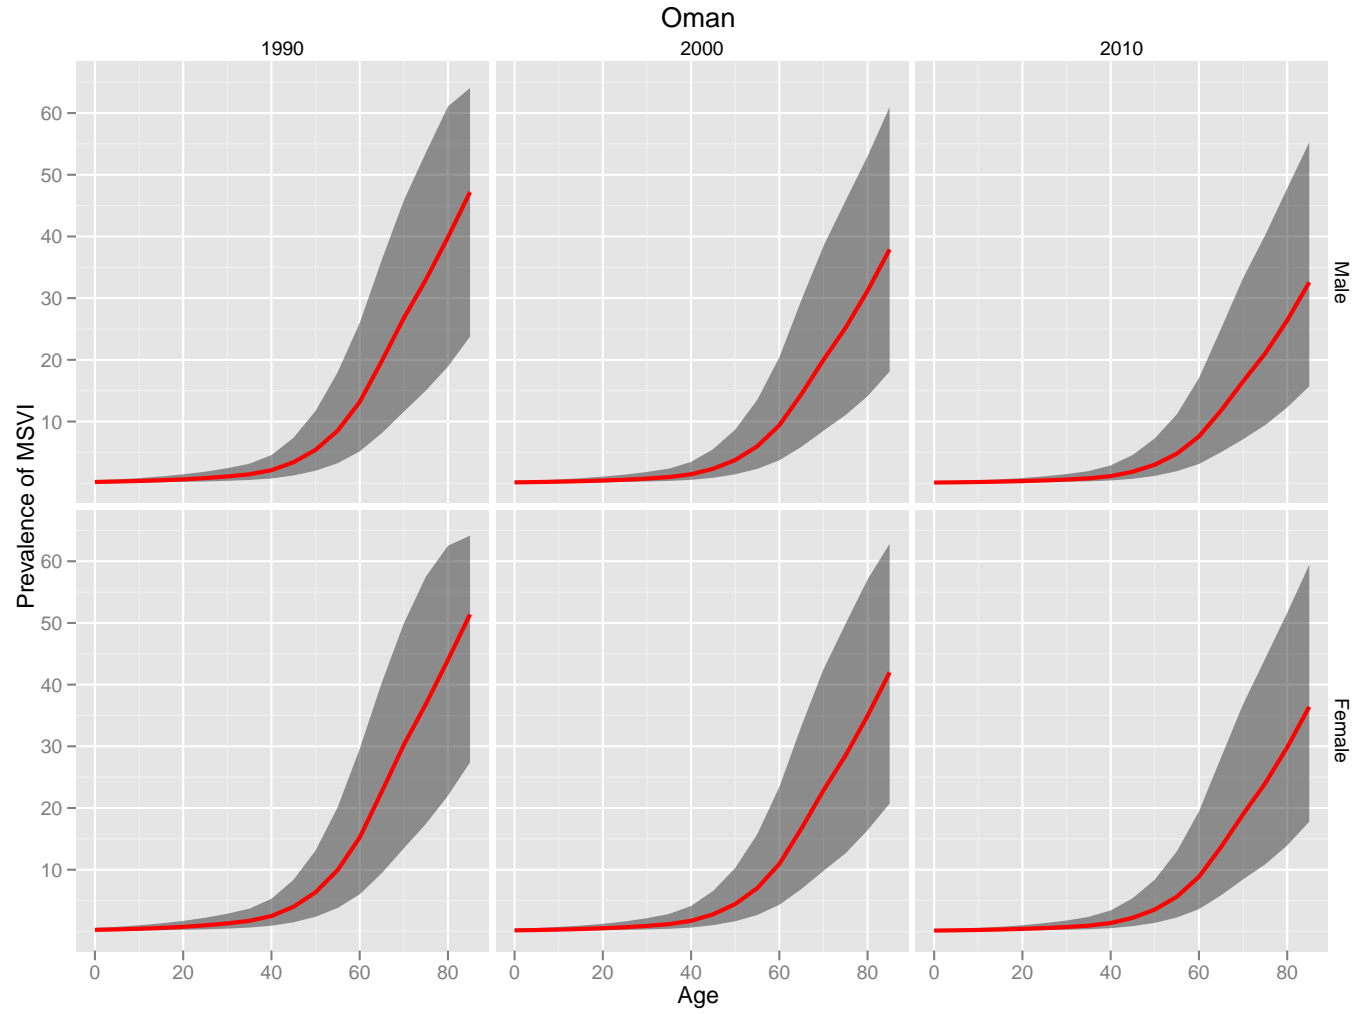

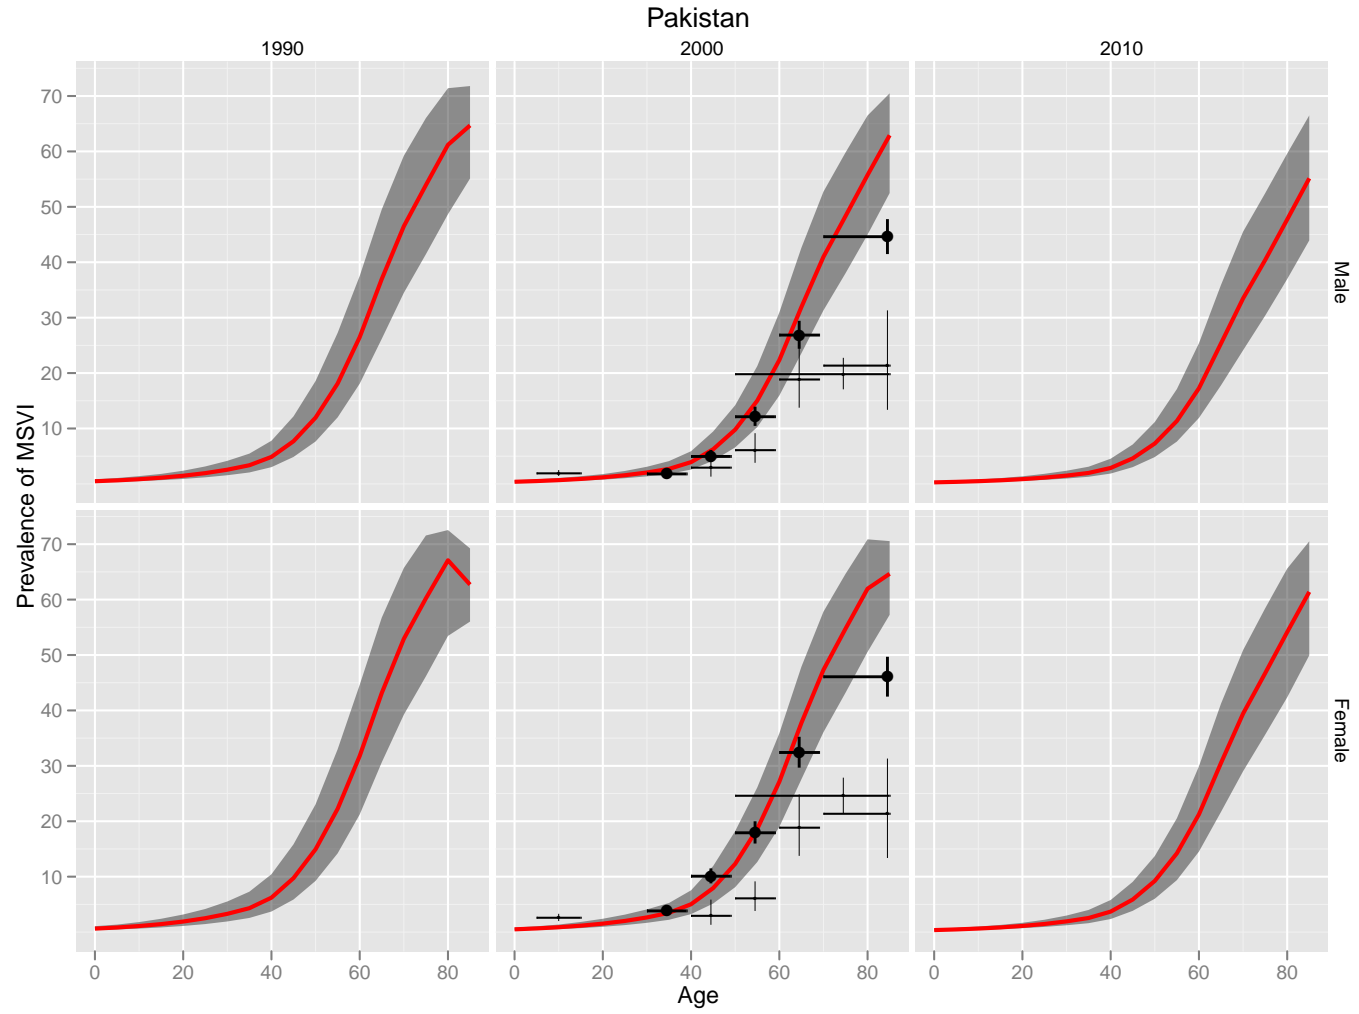

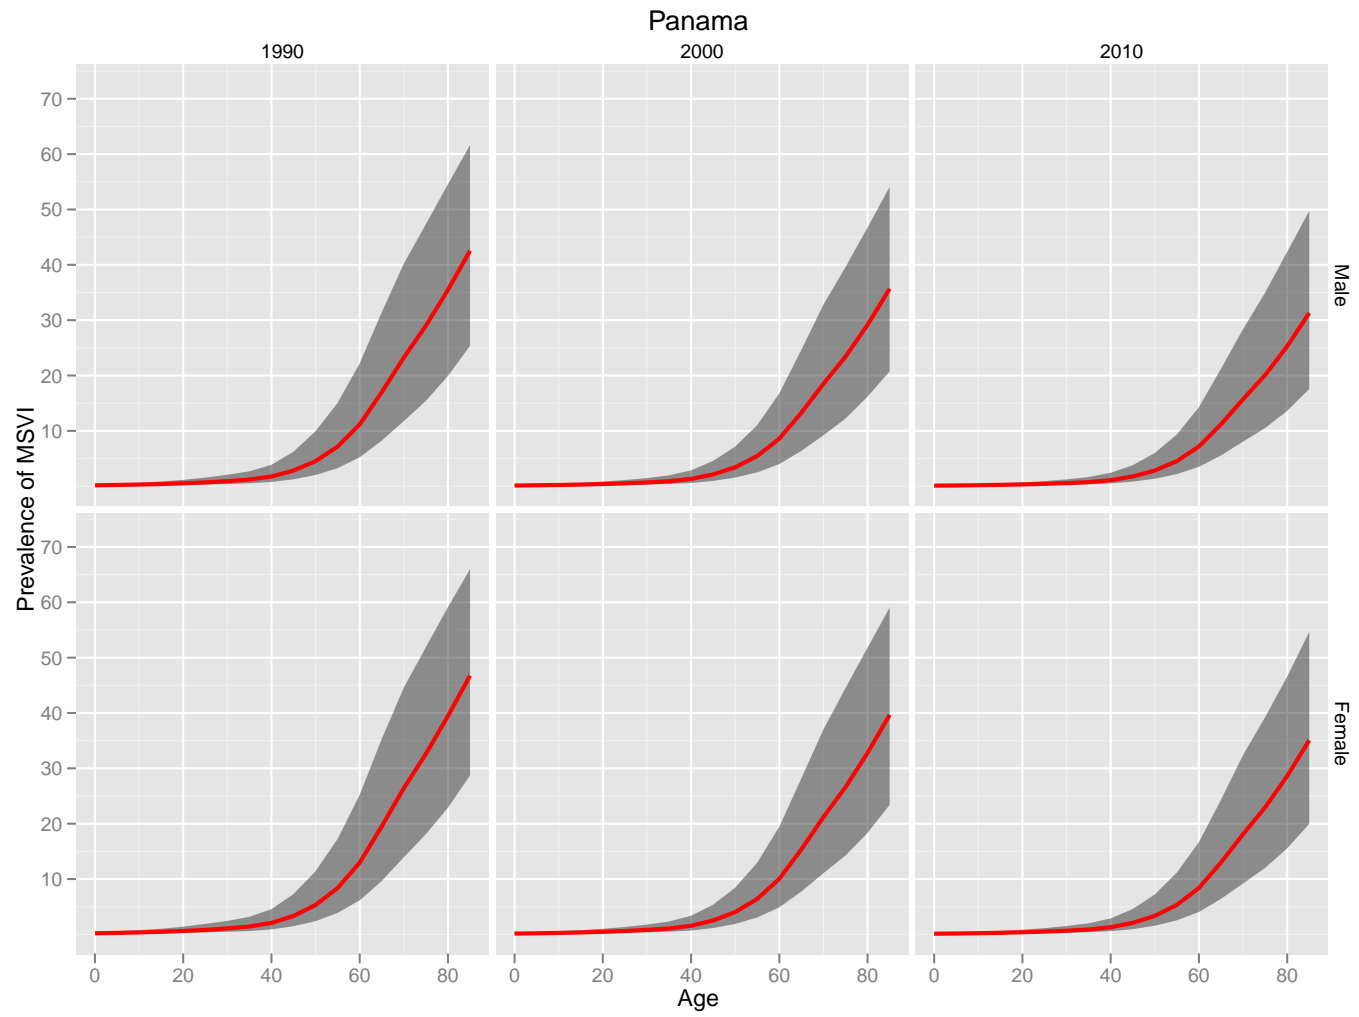

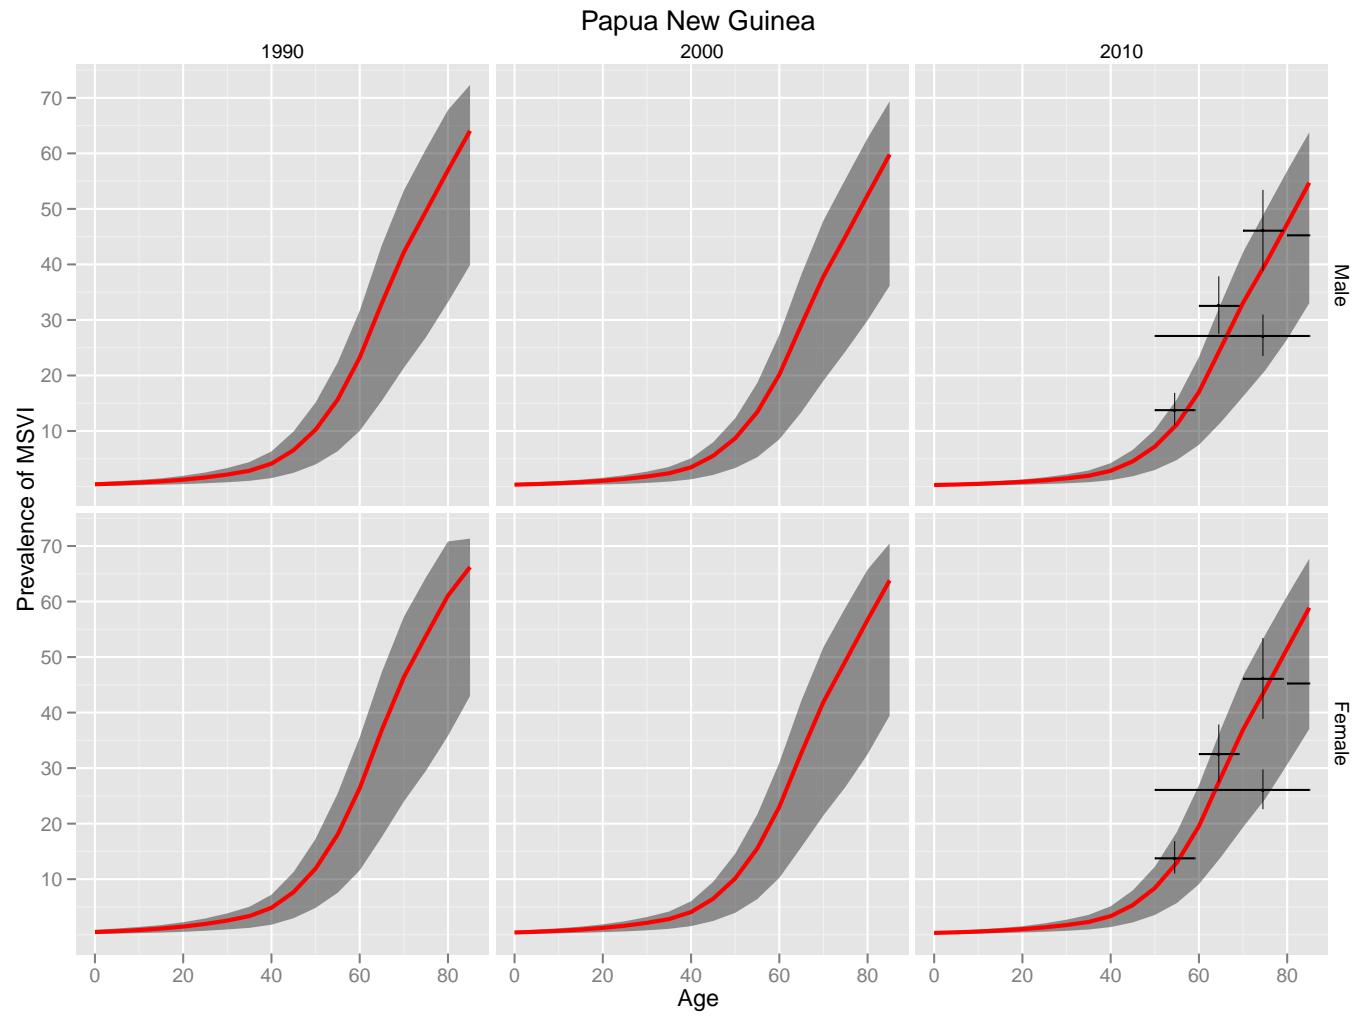

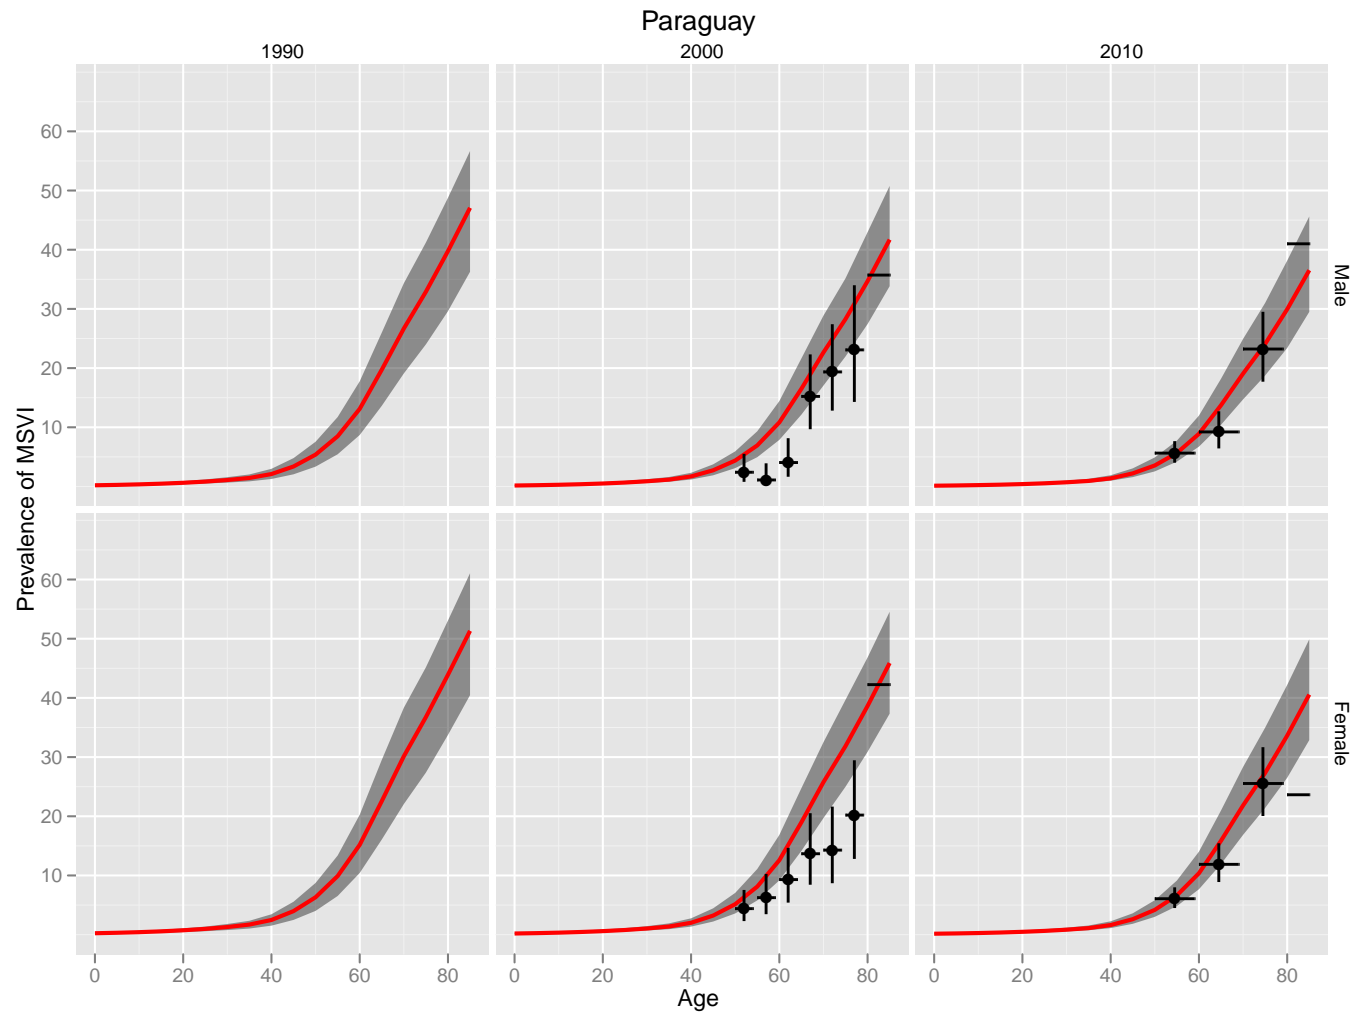

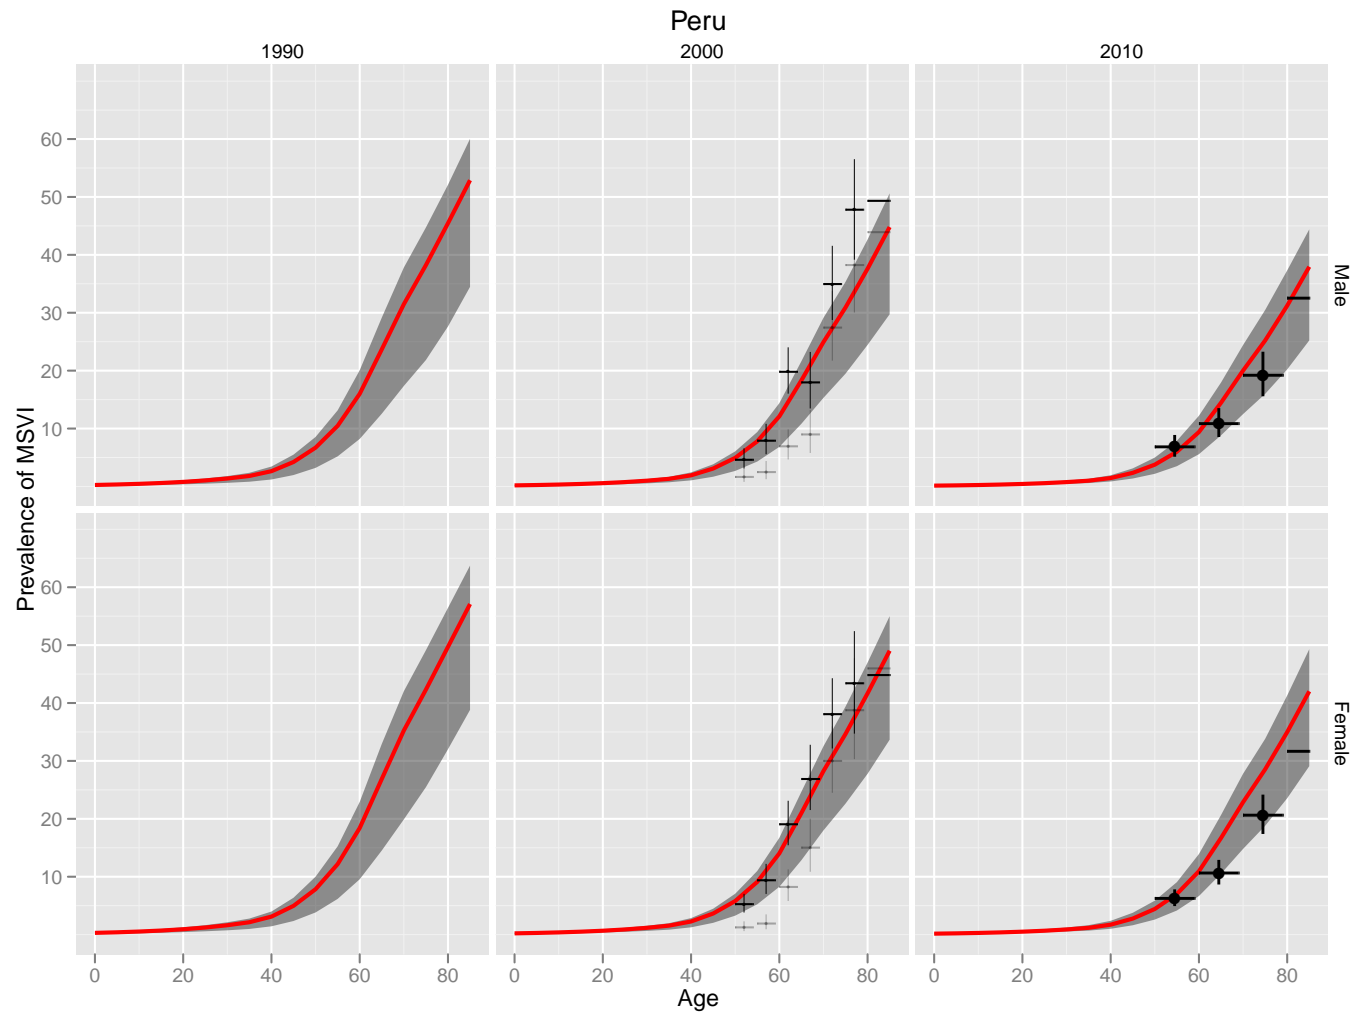

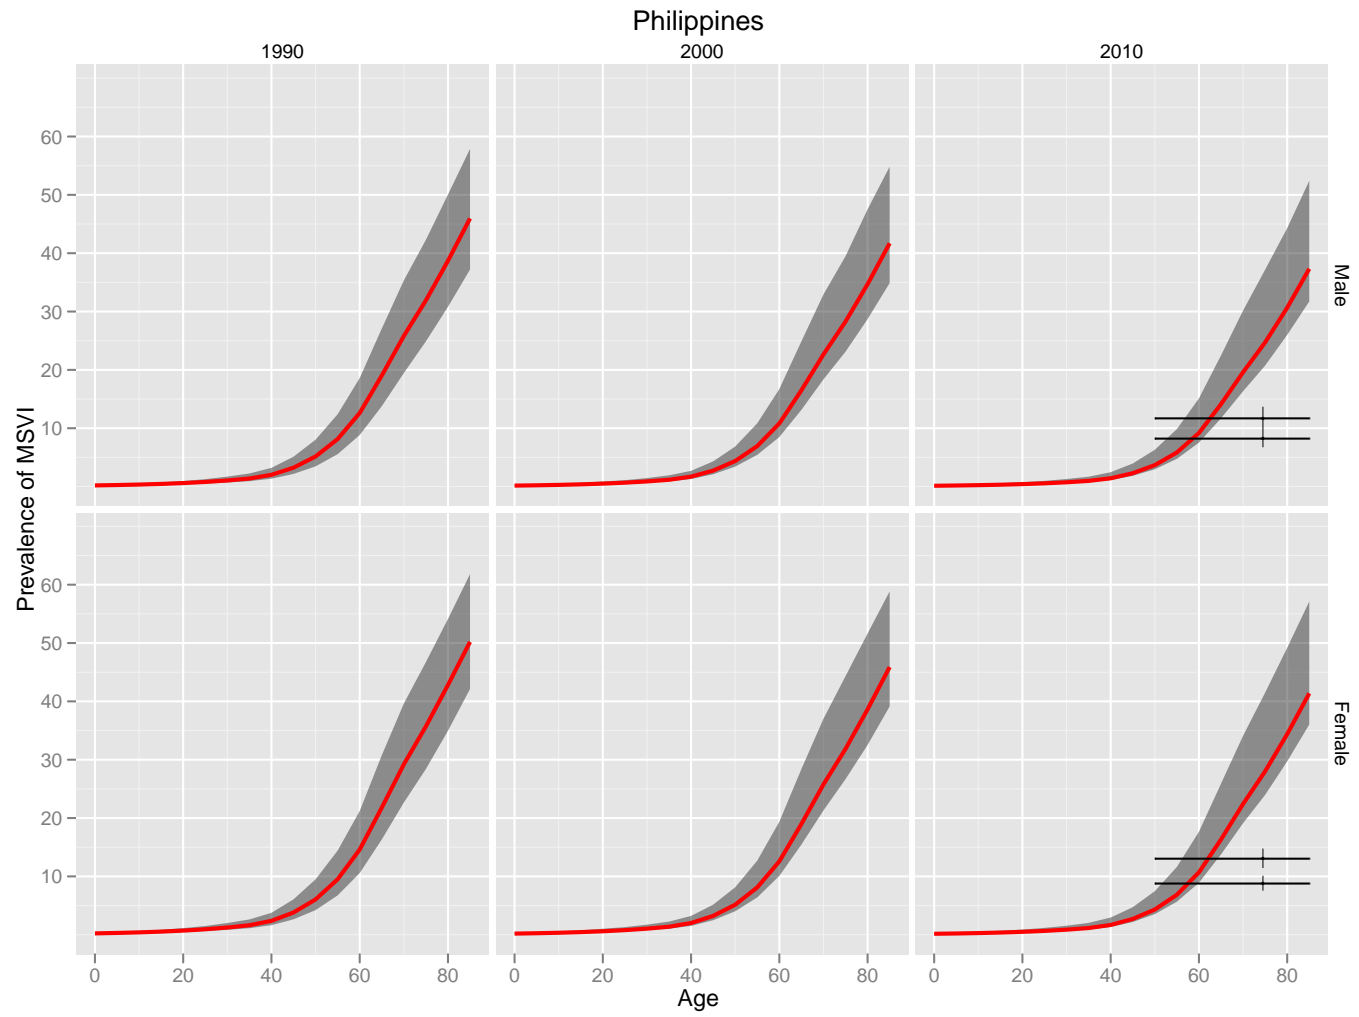



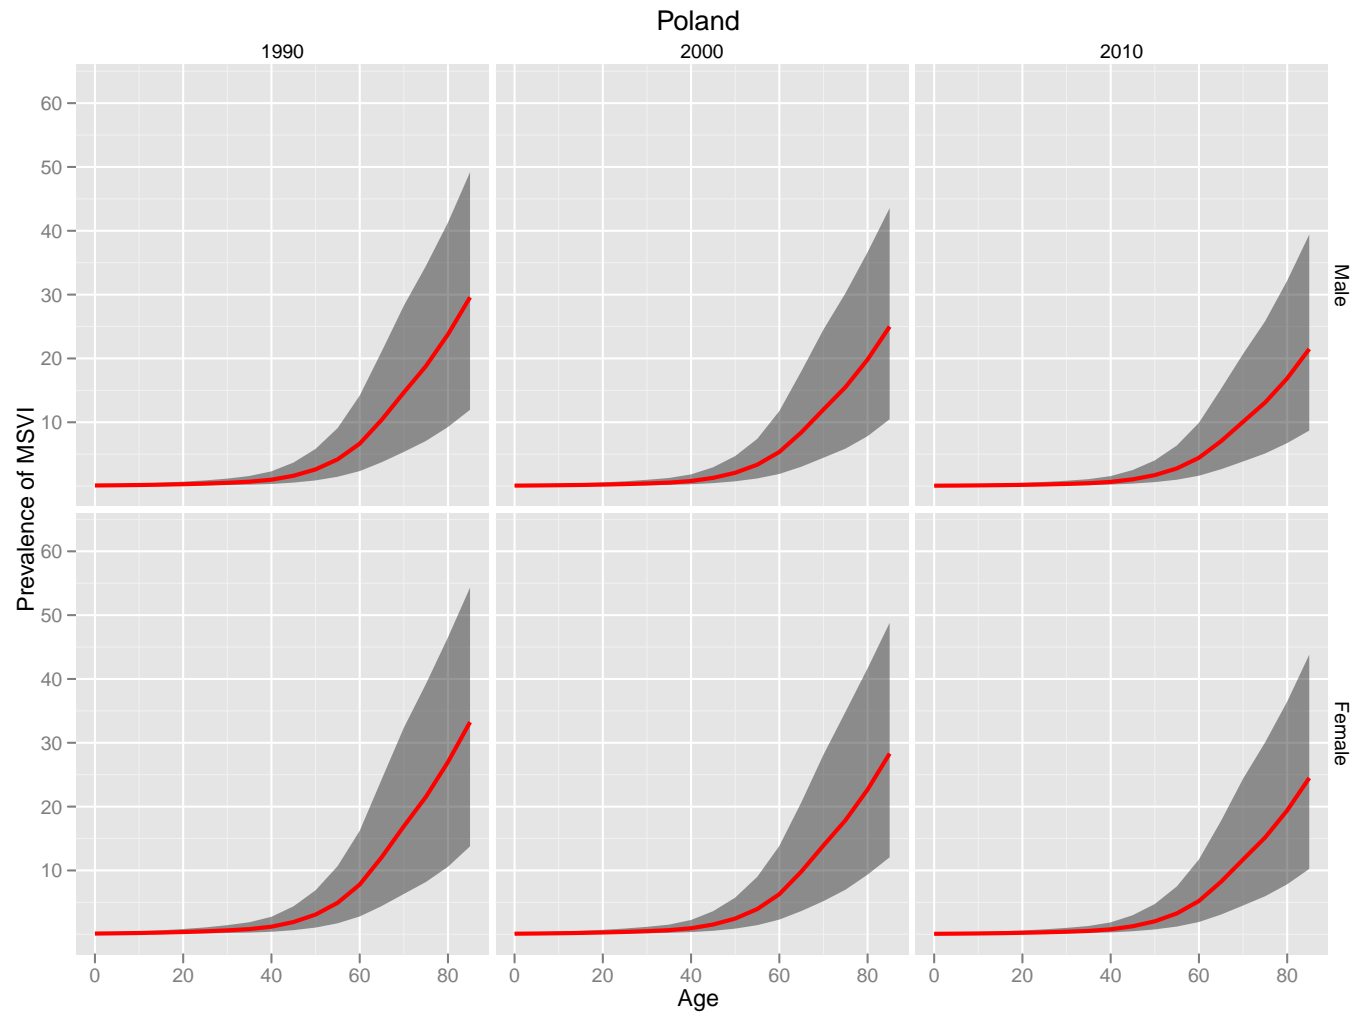

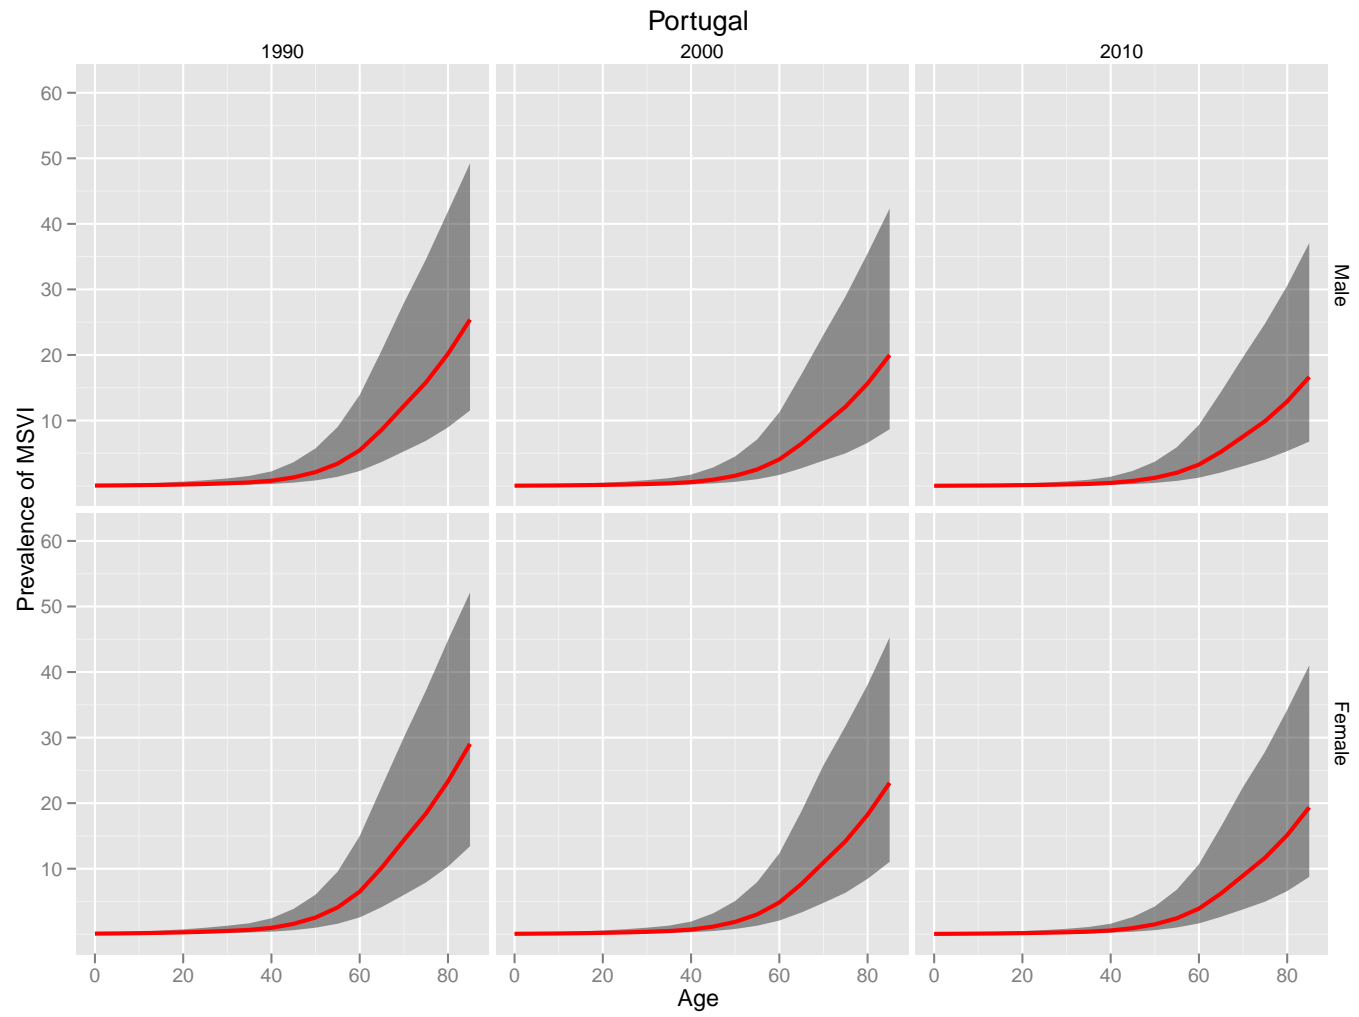

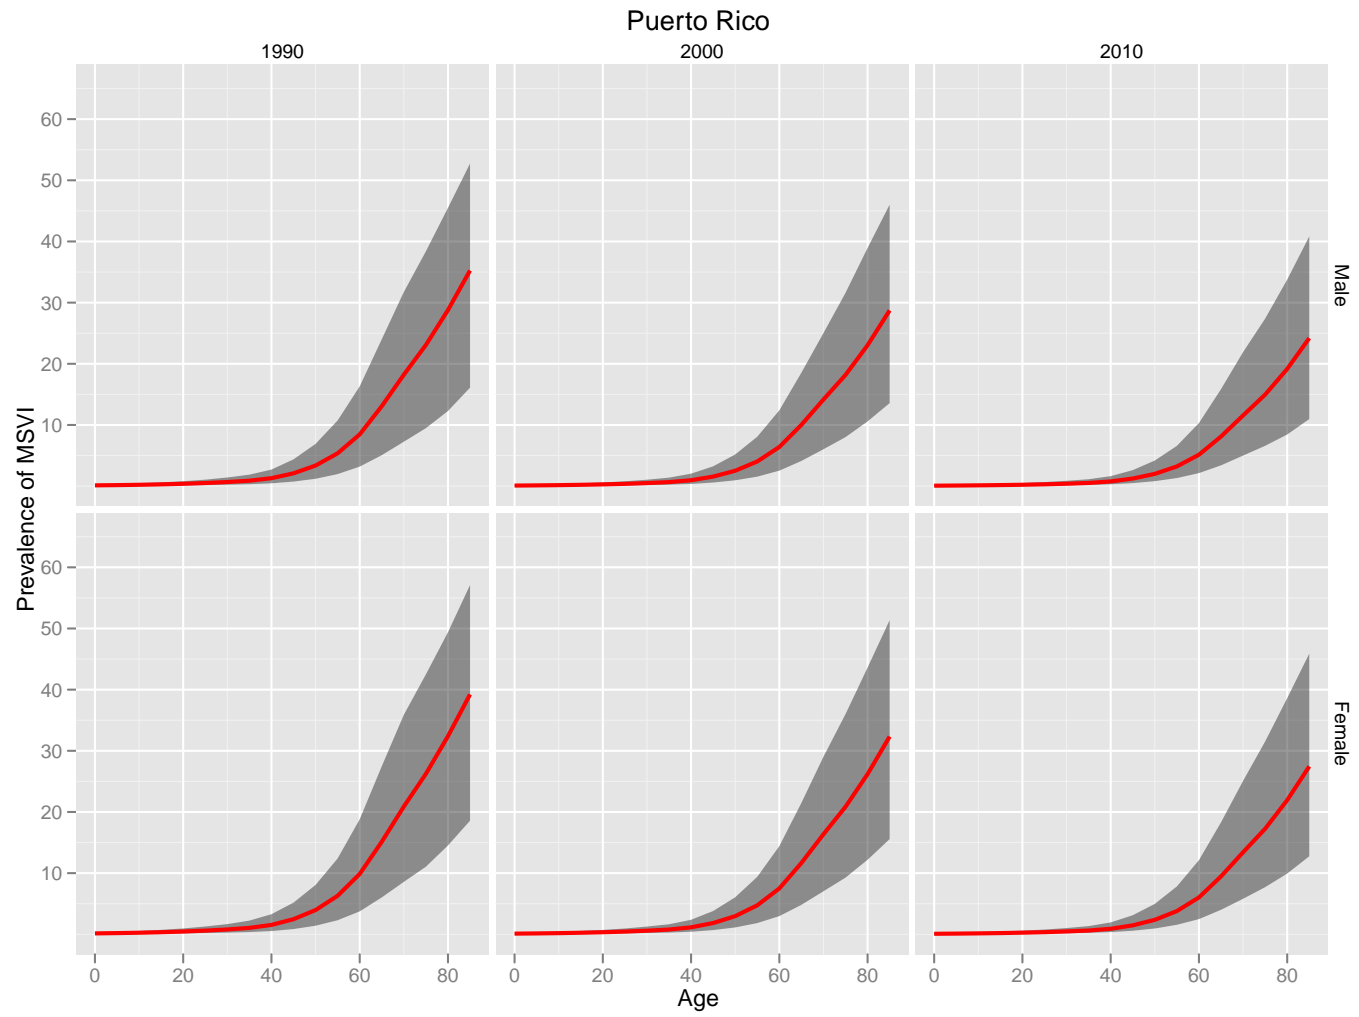

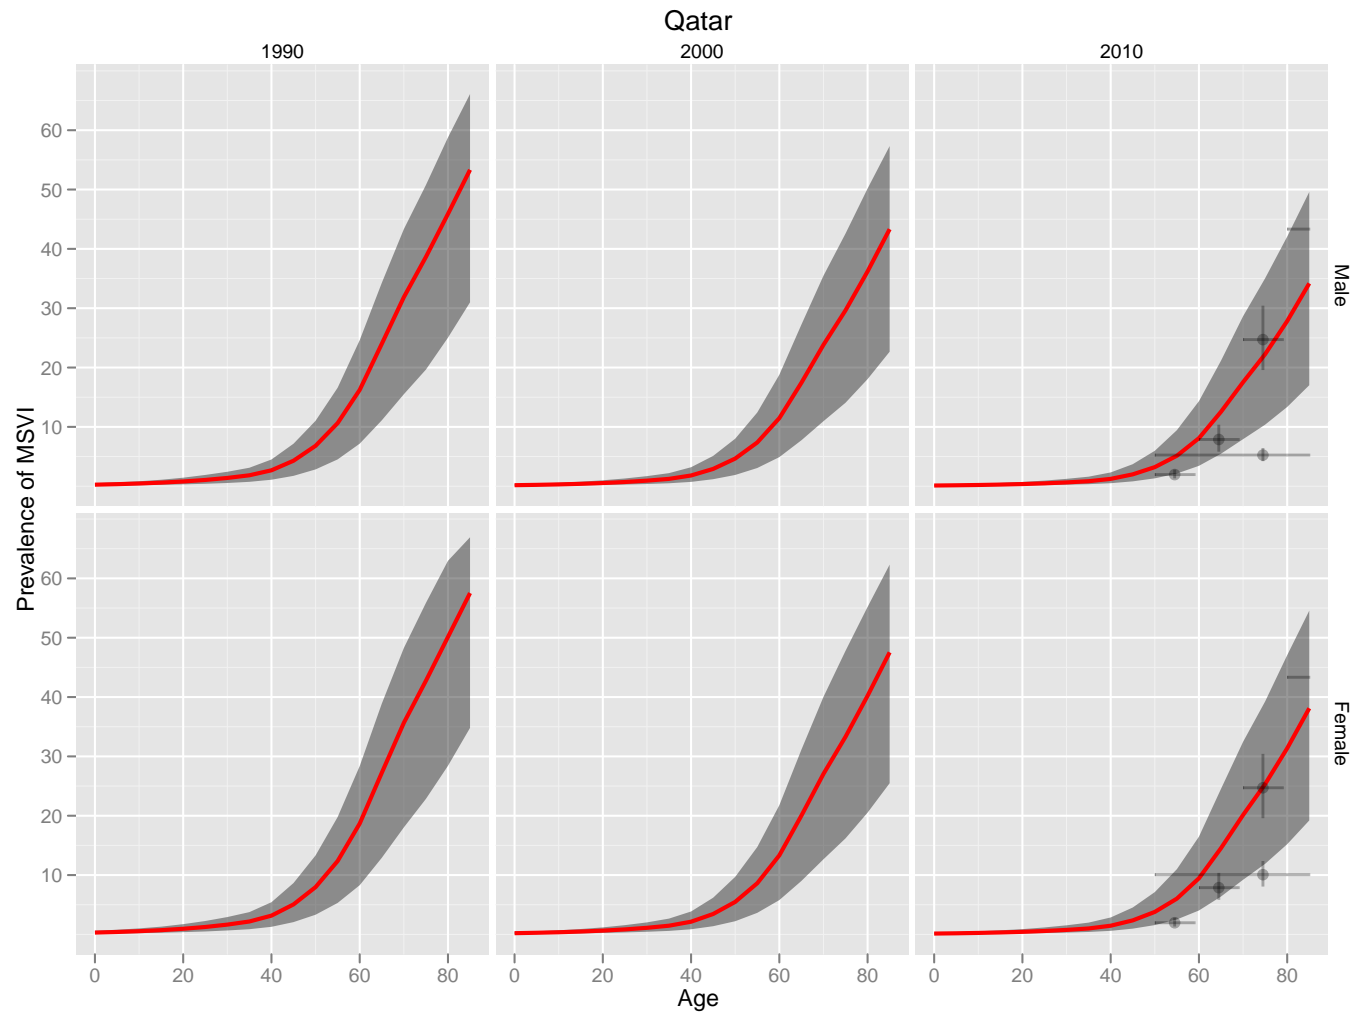

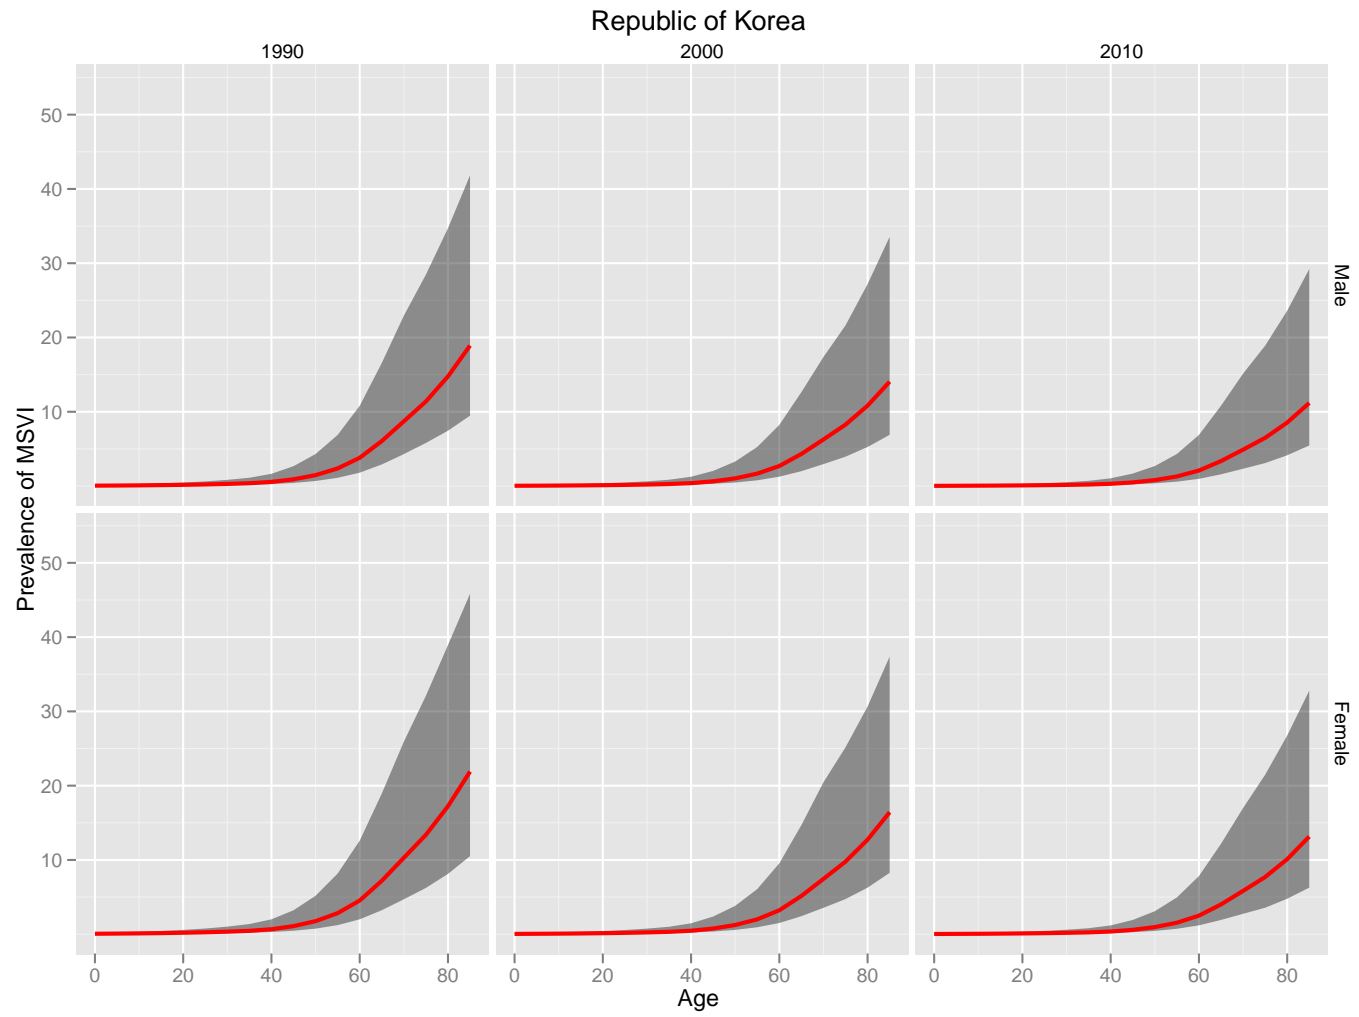

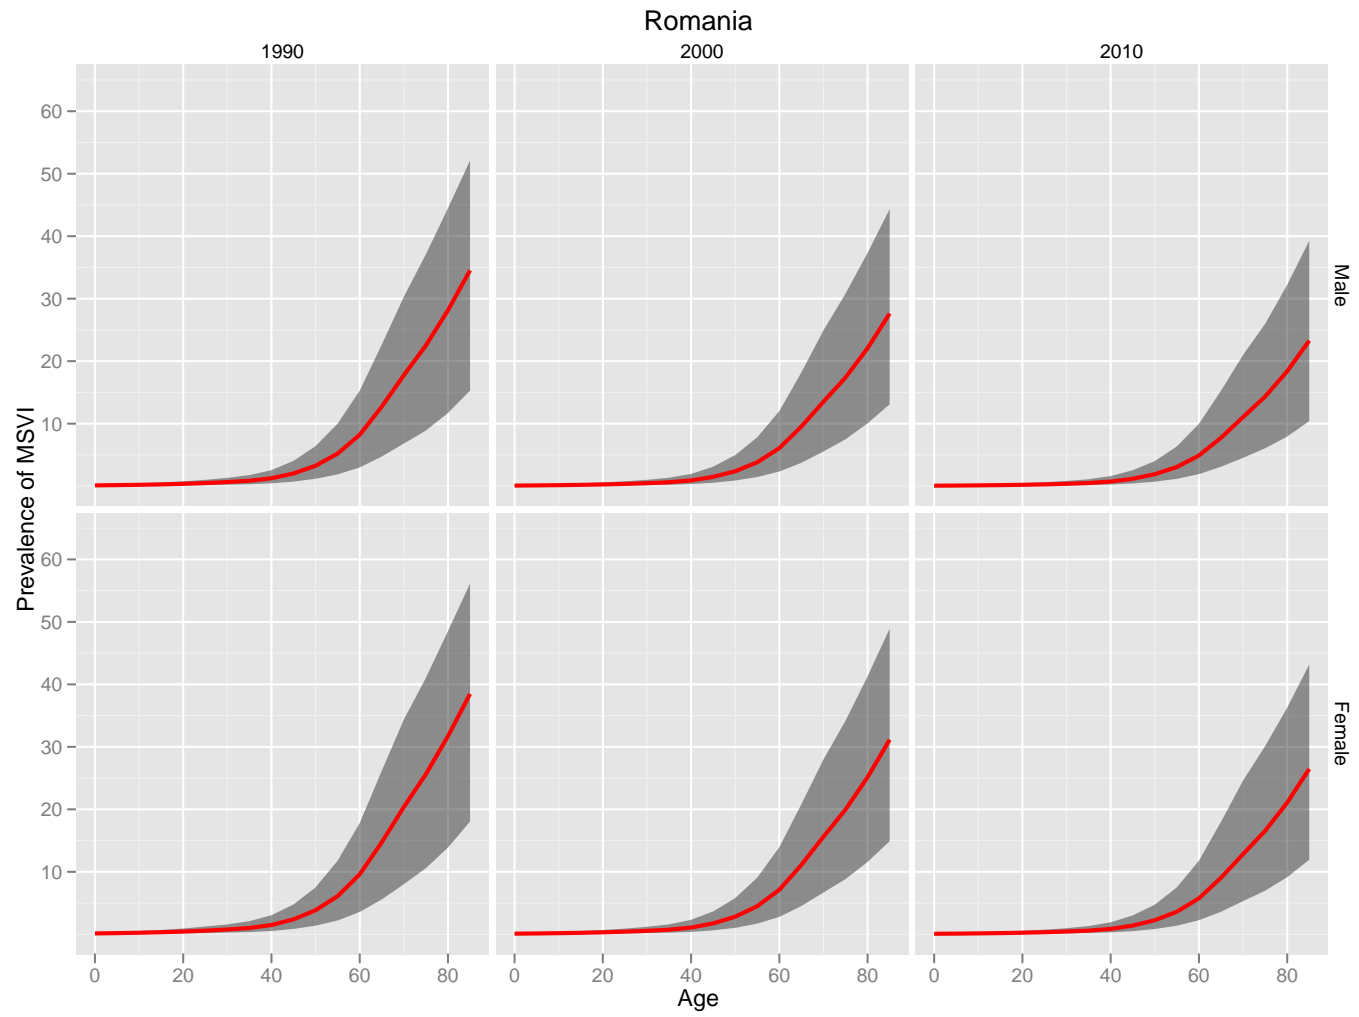

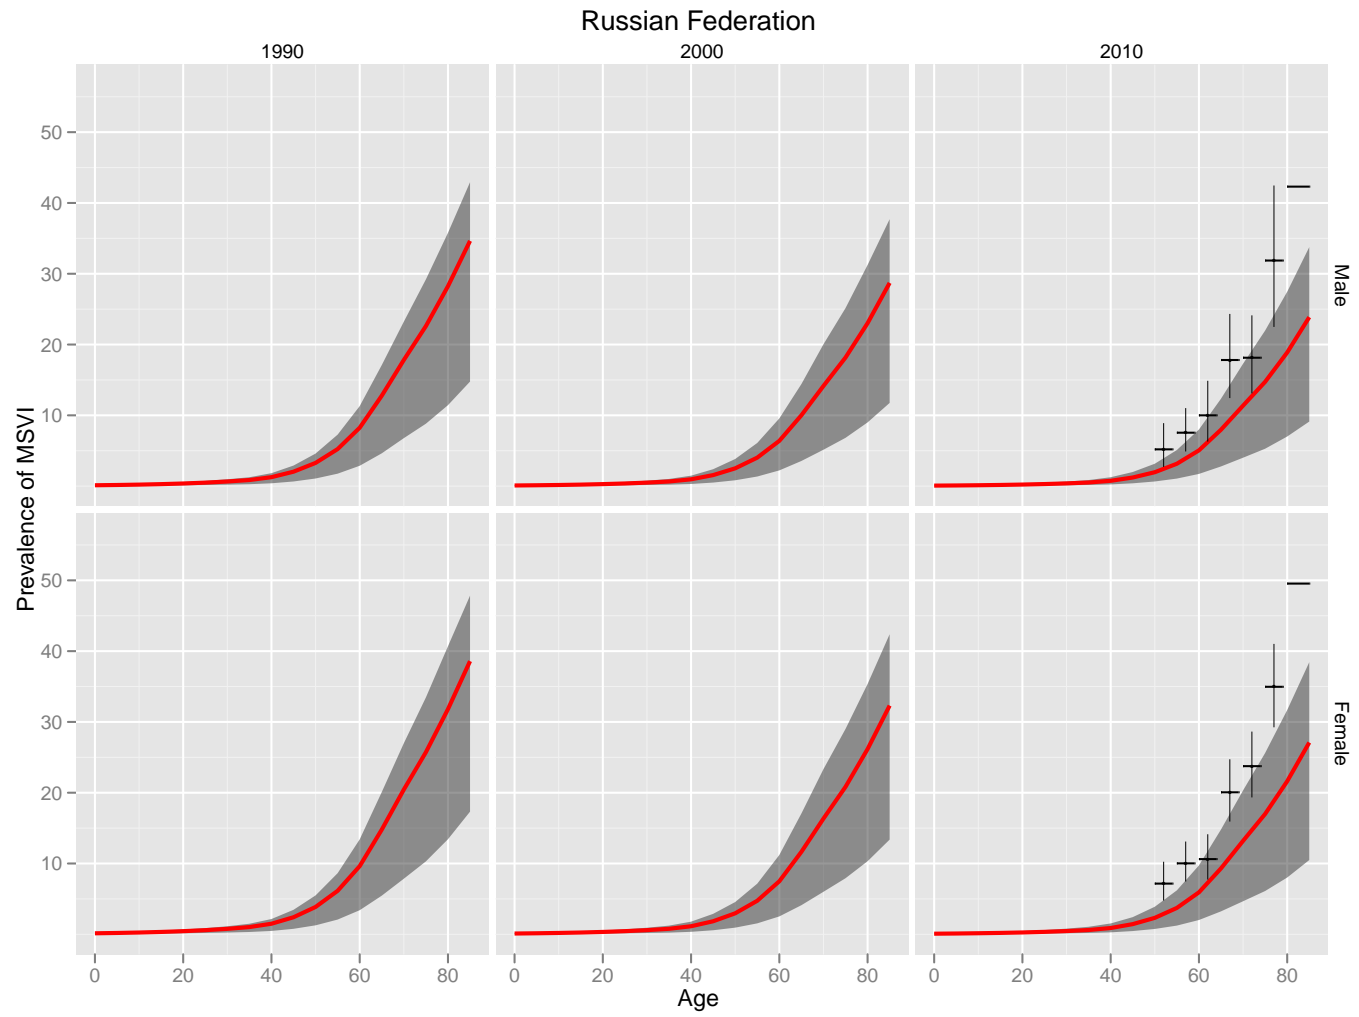

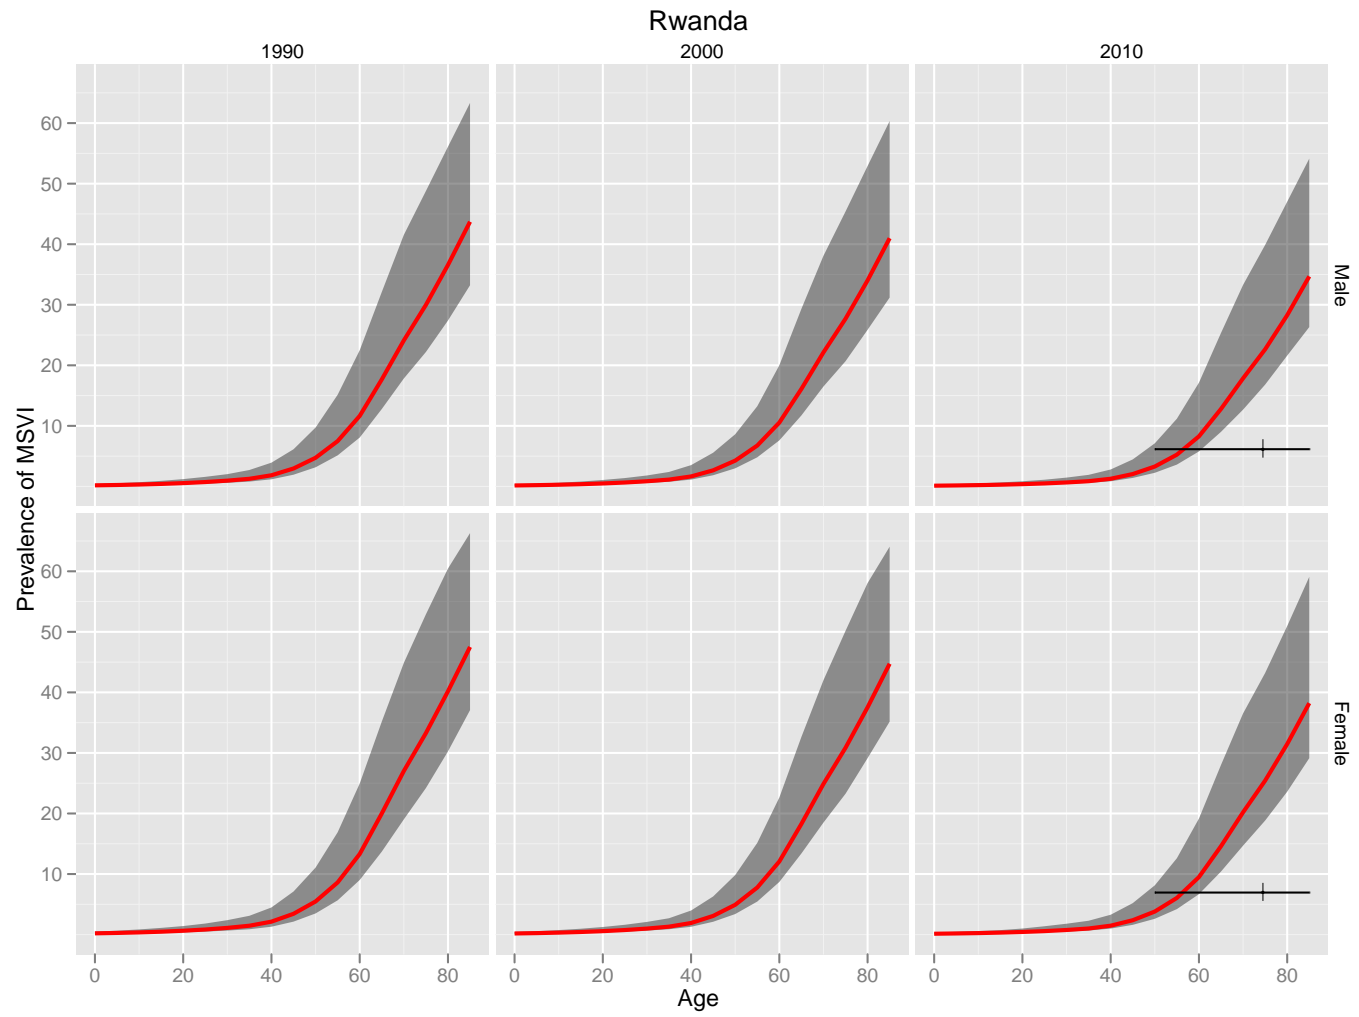



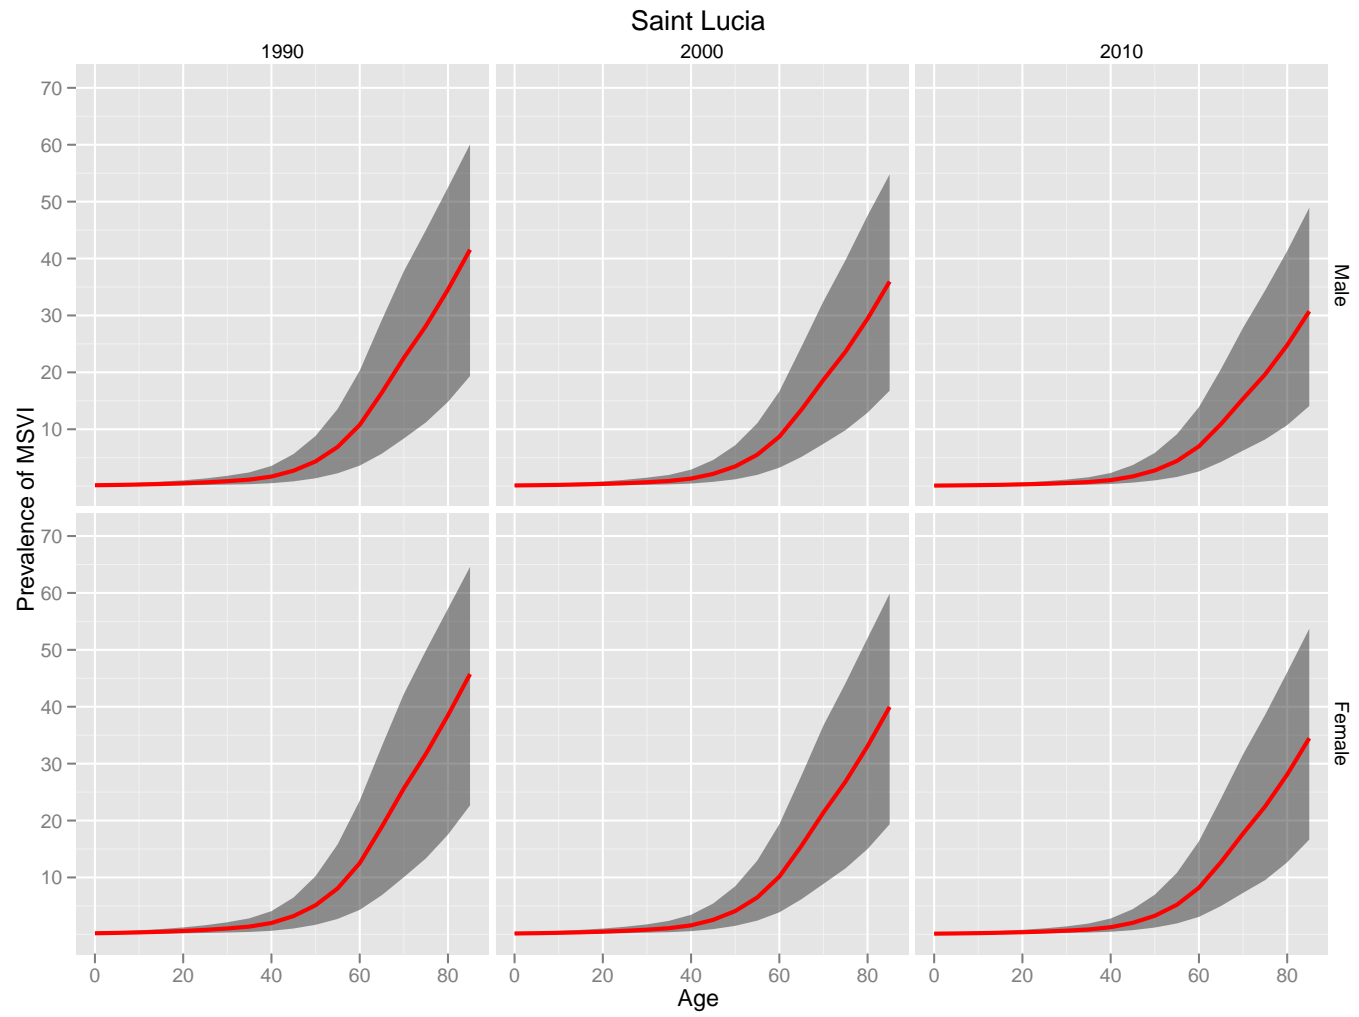

Saint Vincent and the Grenadines

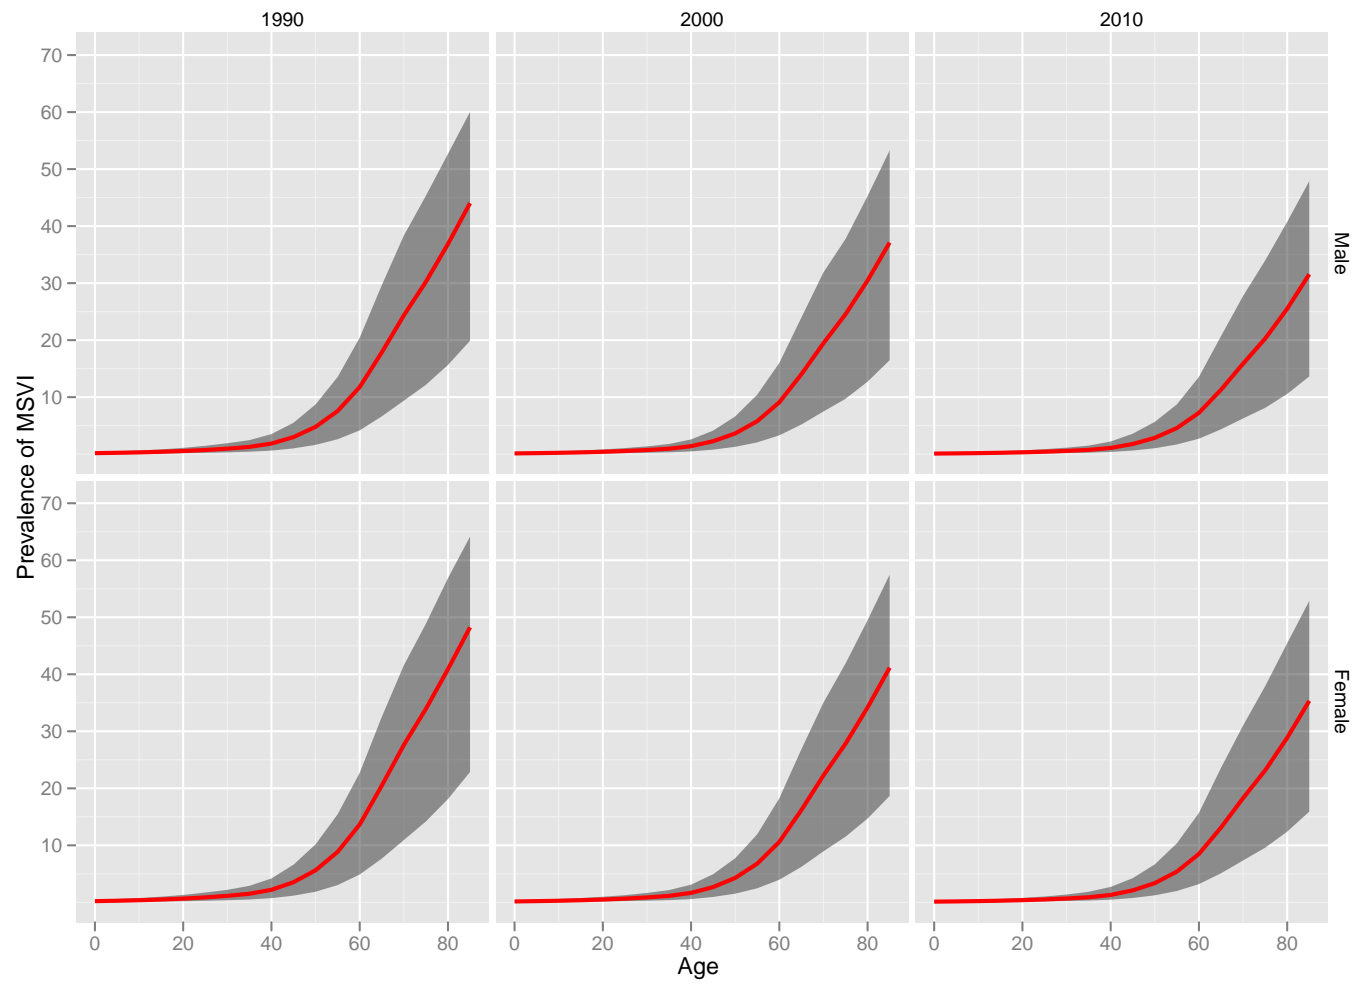

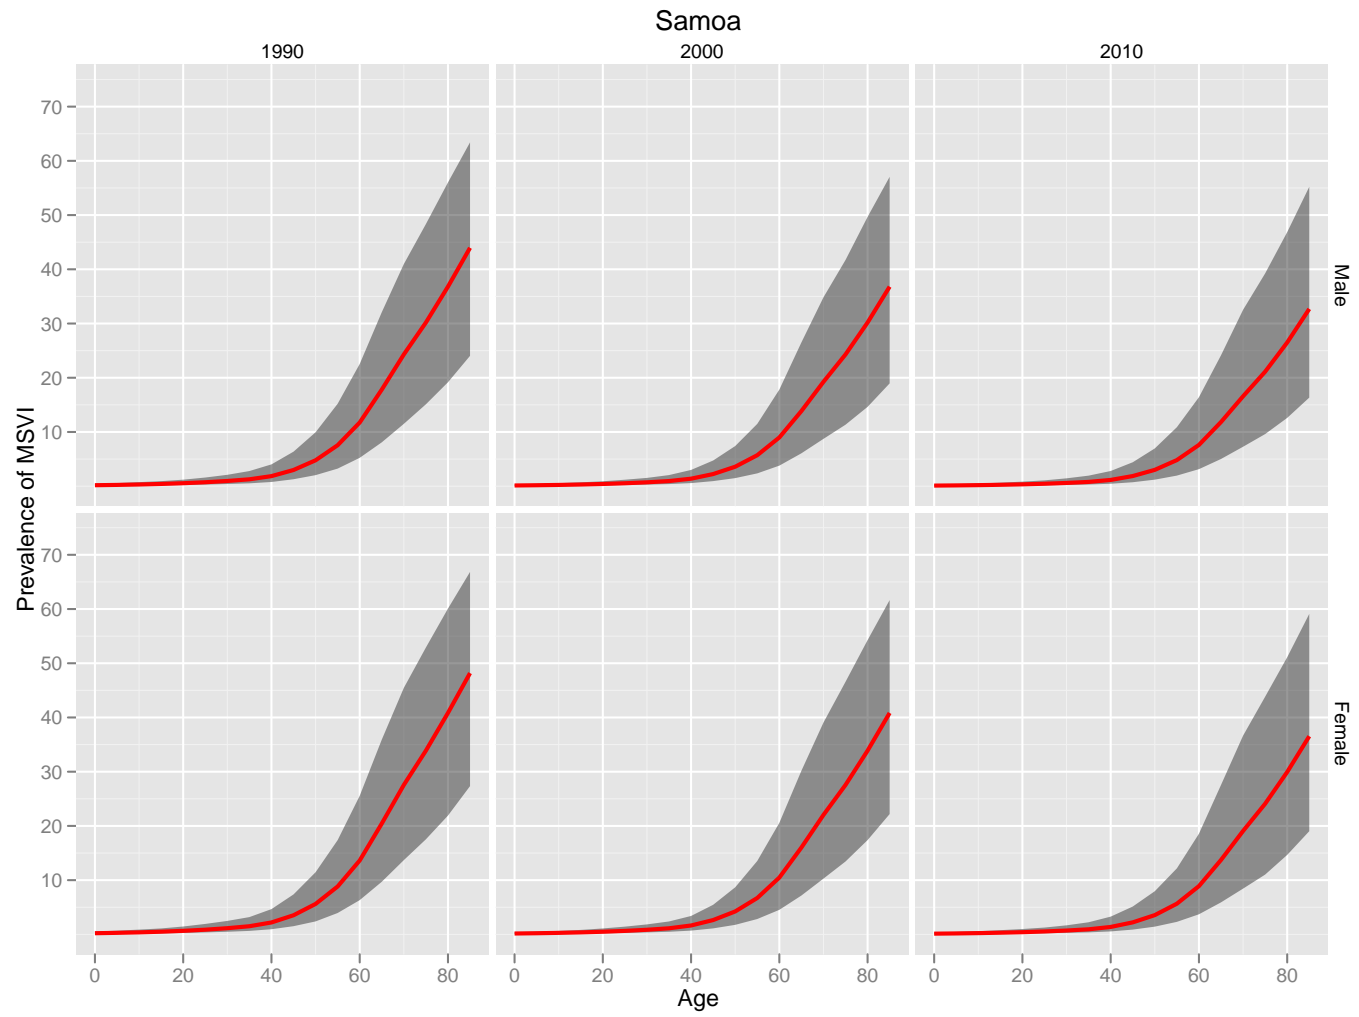

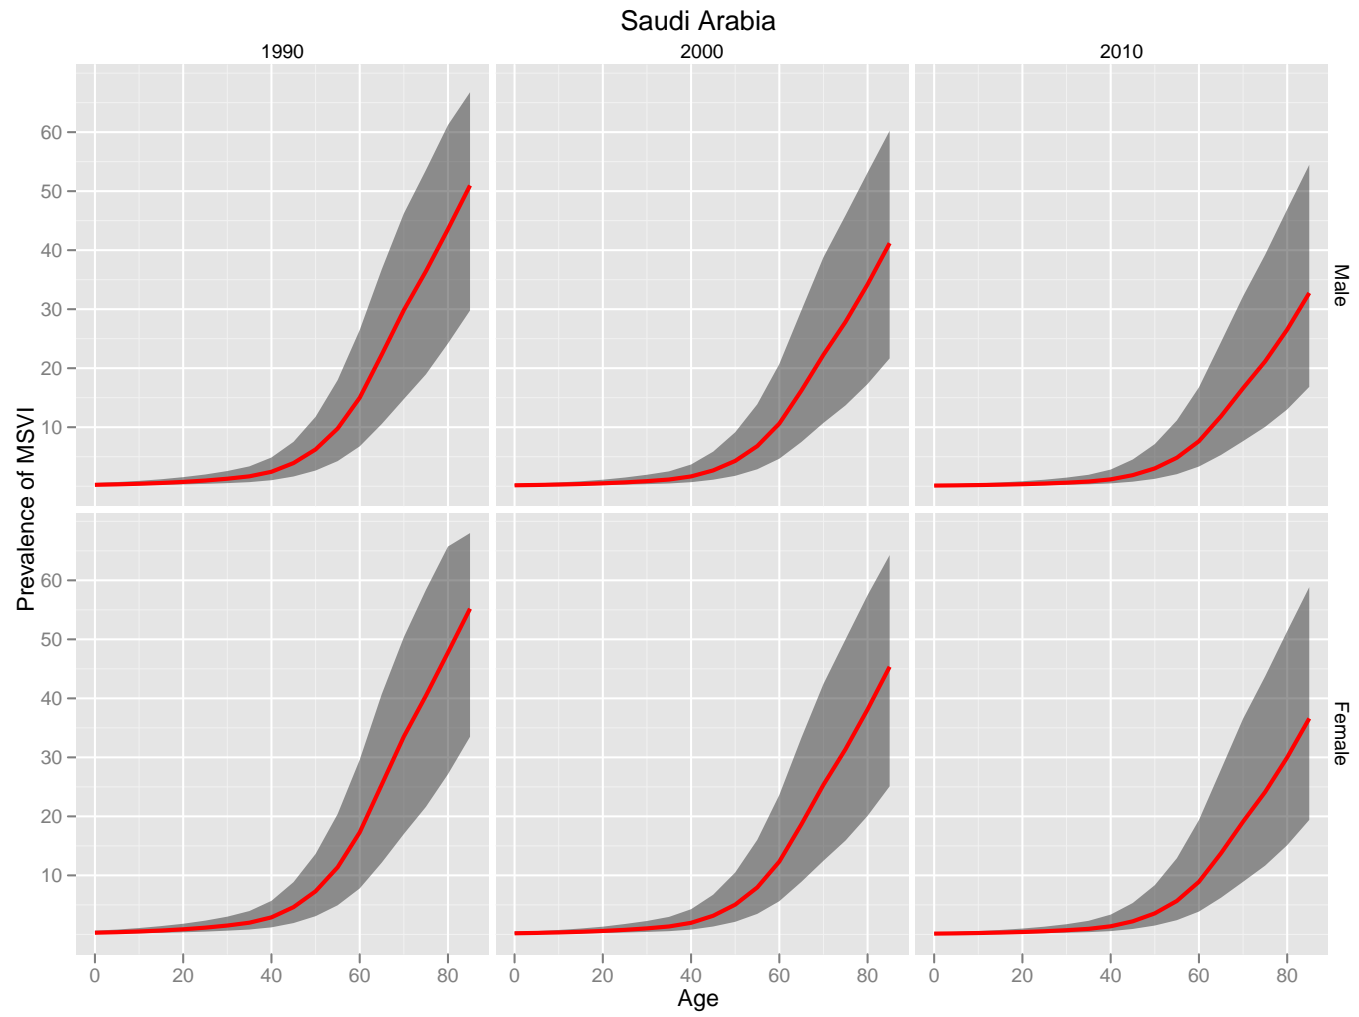

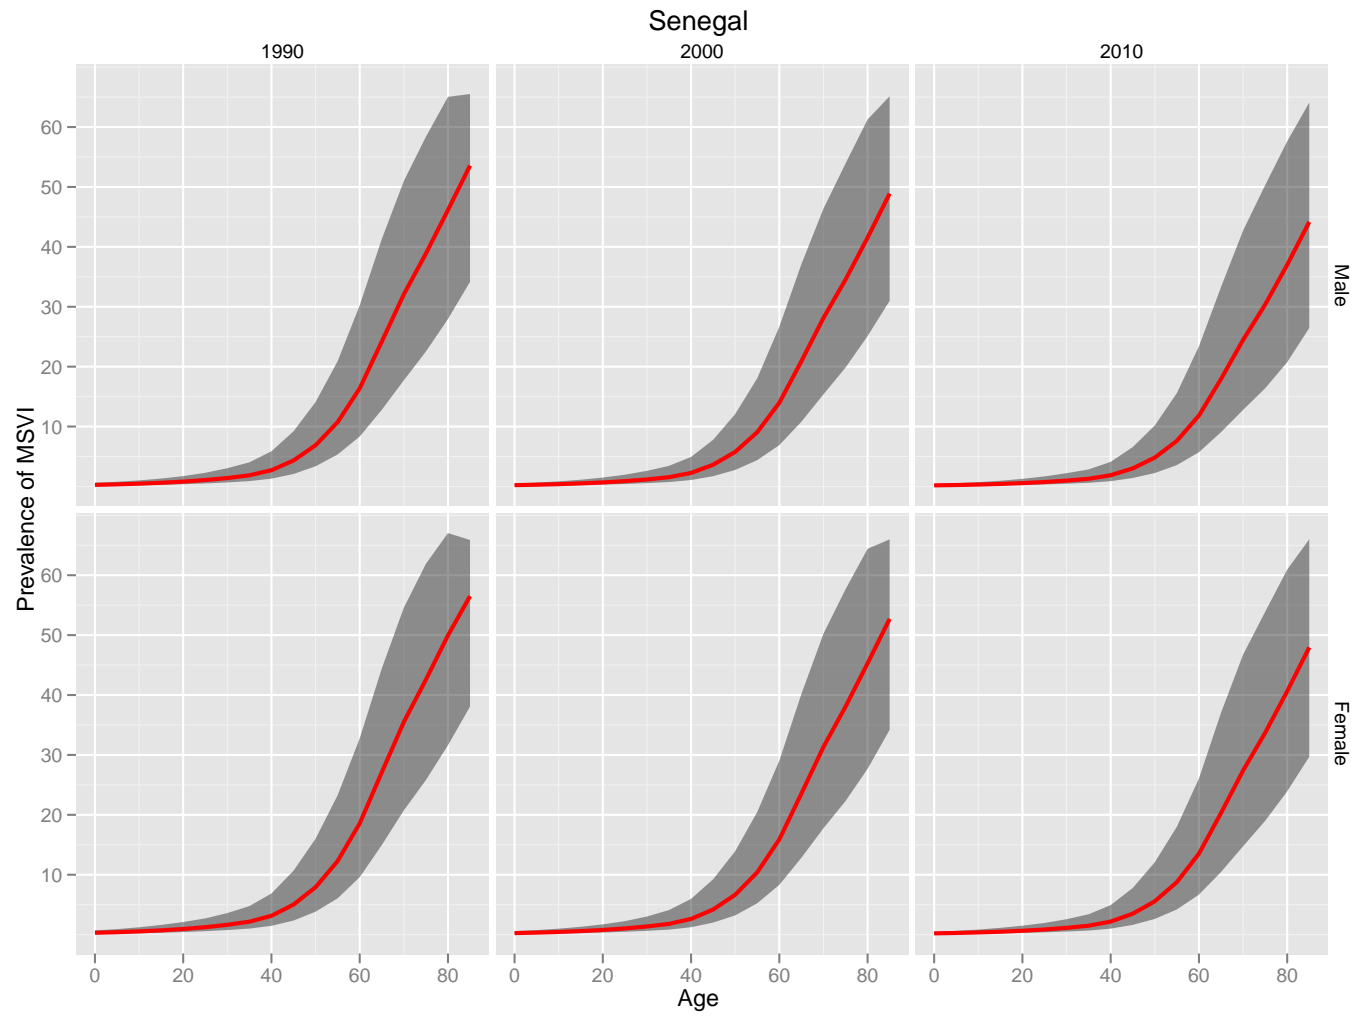

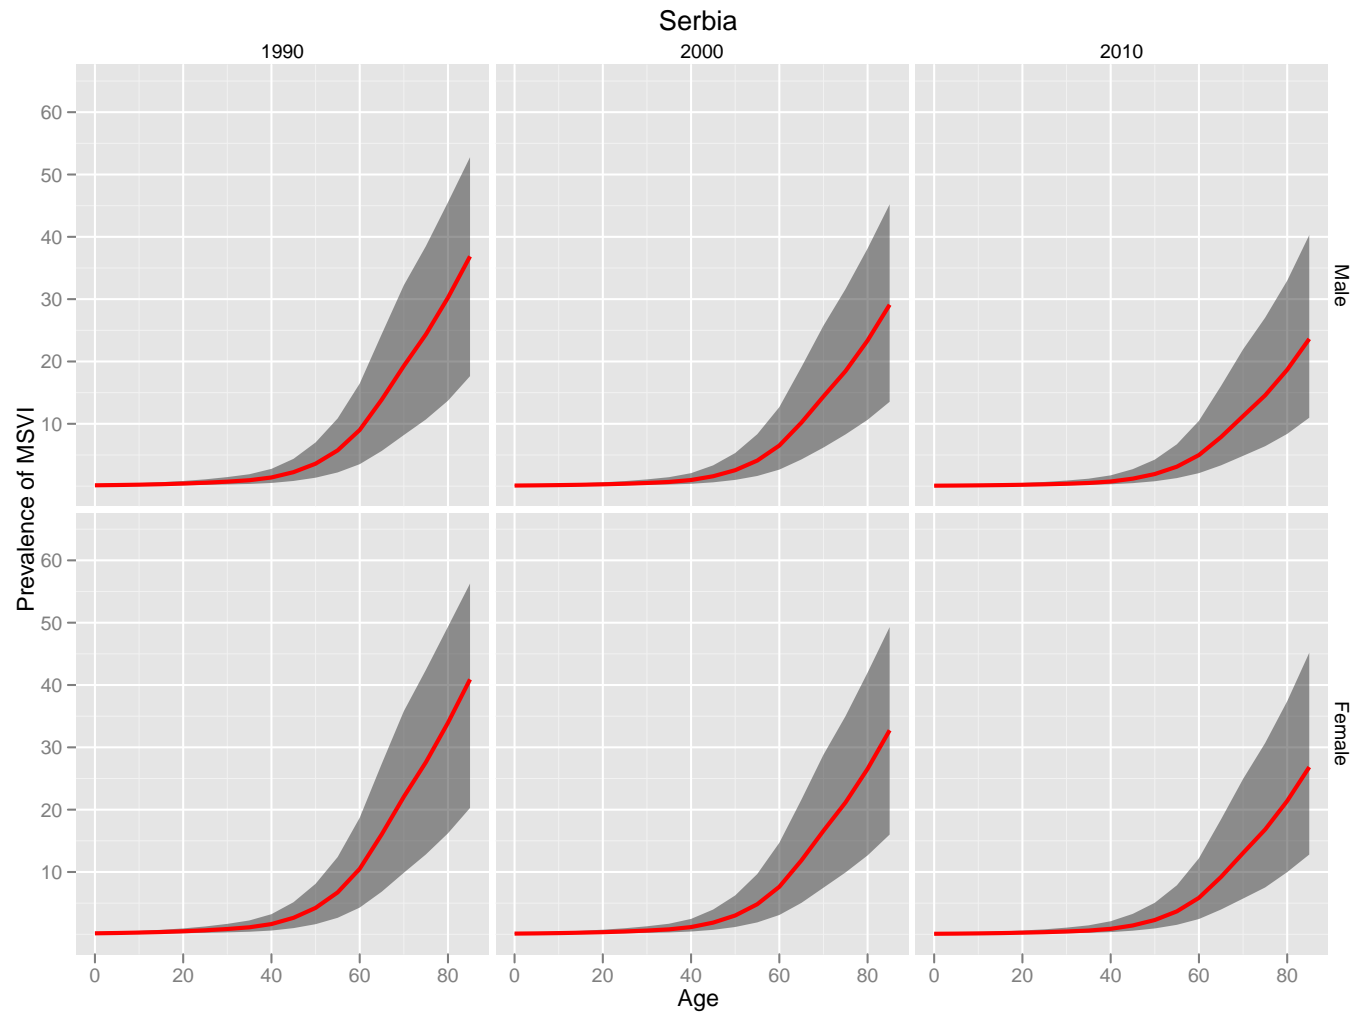

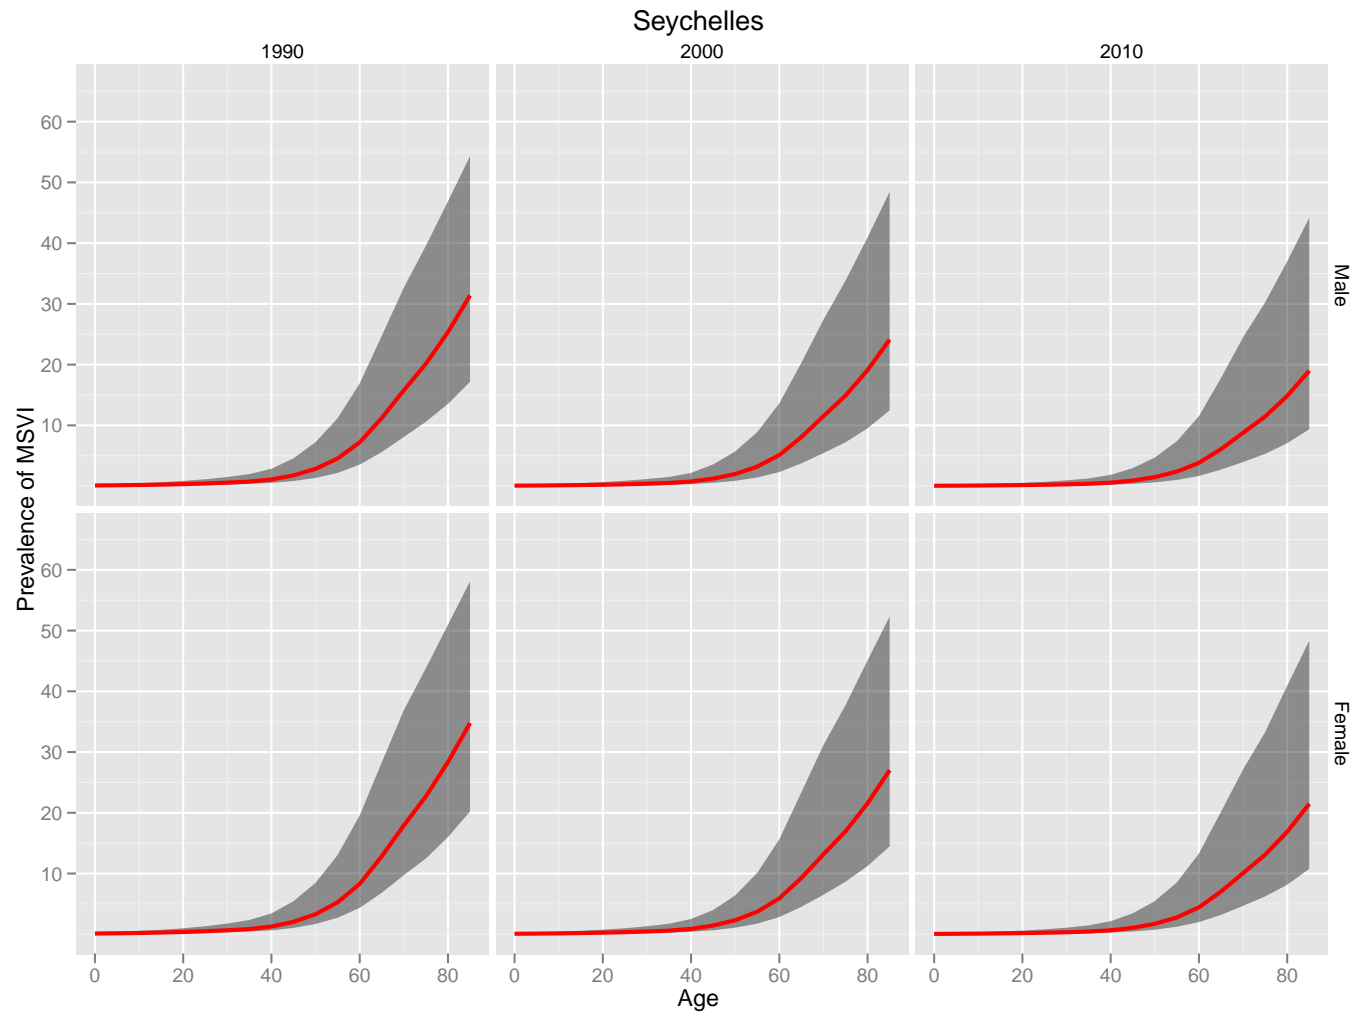

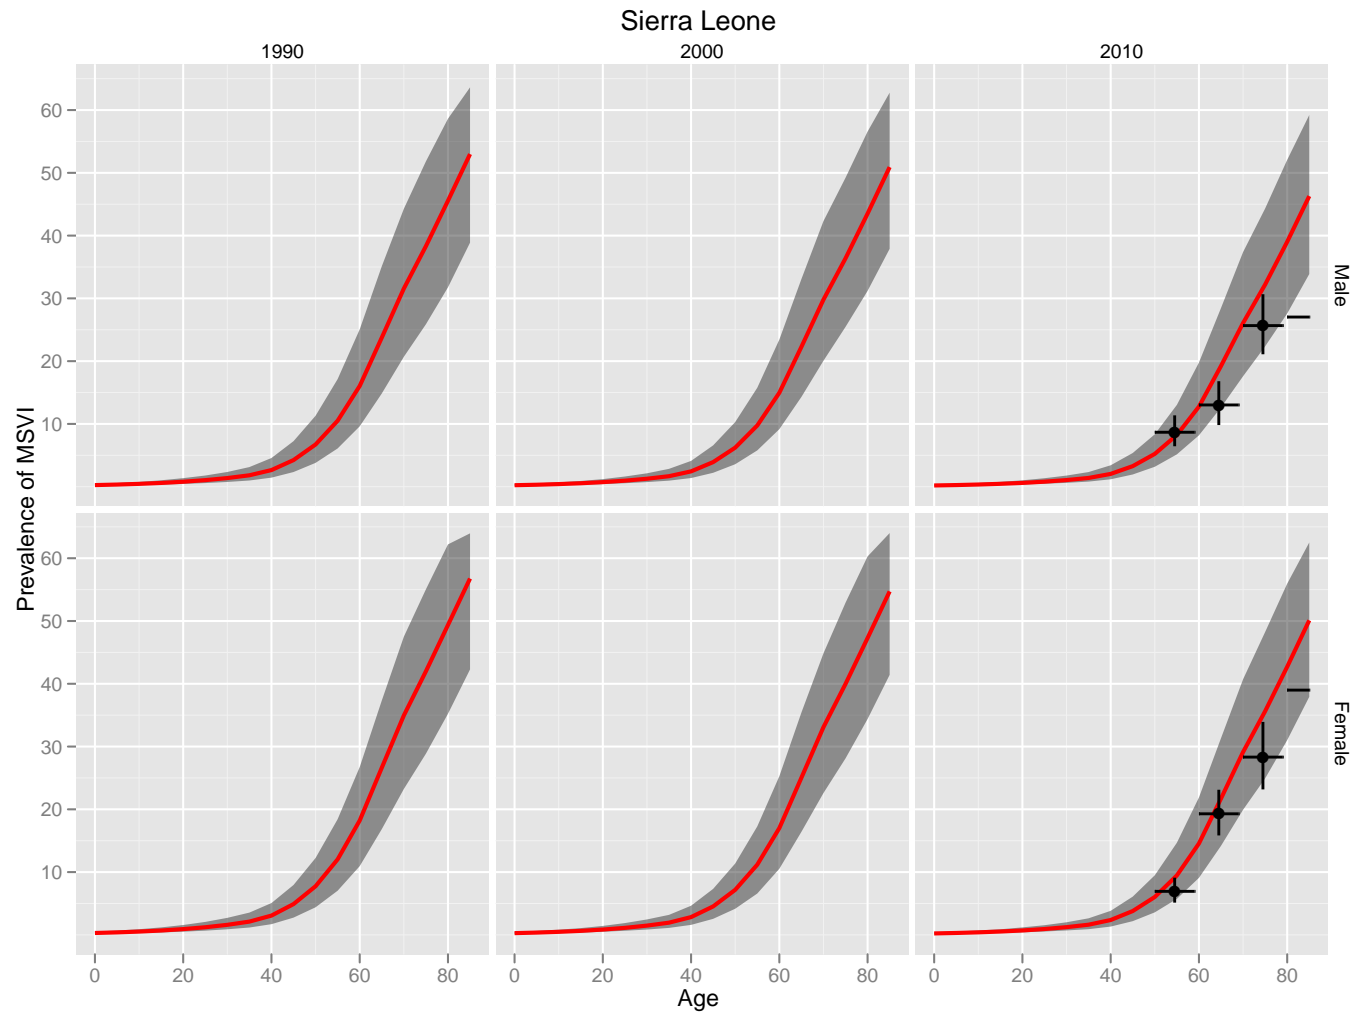



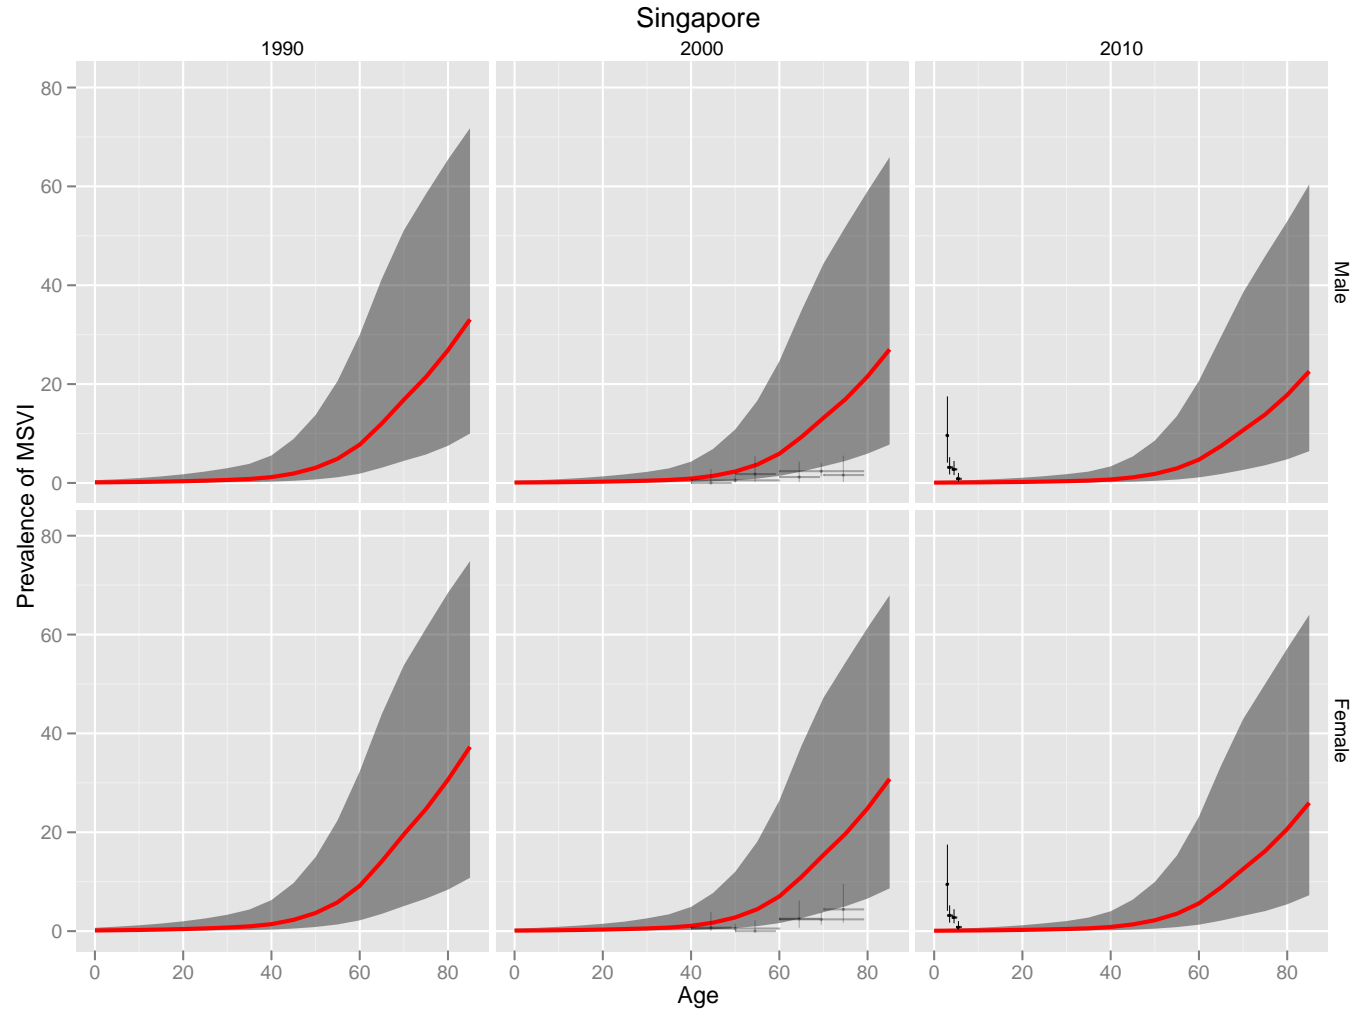

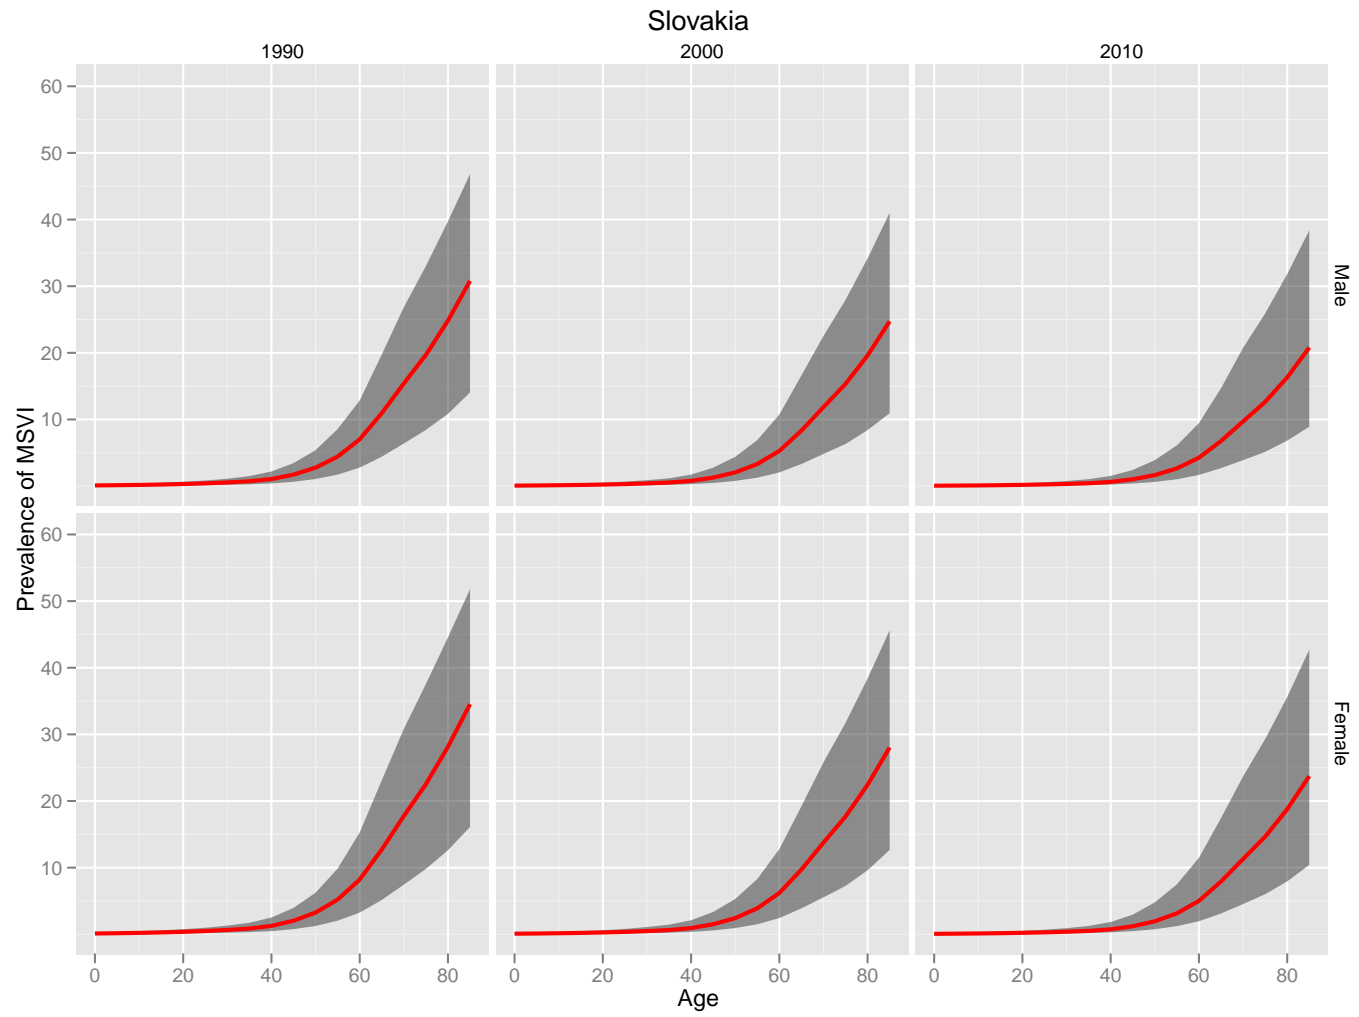

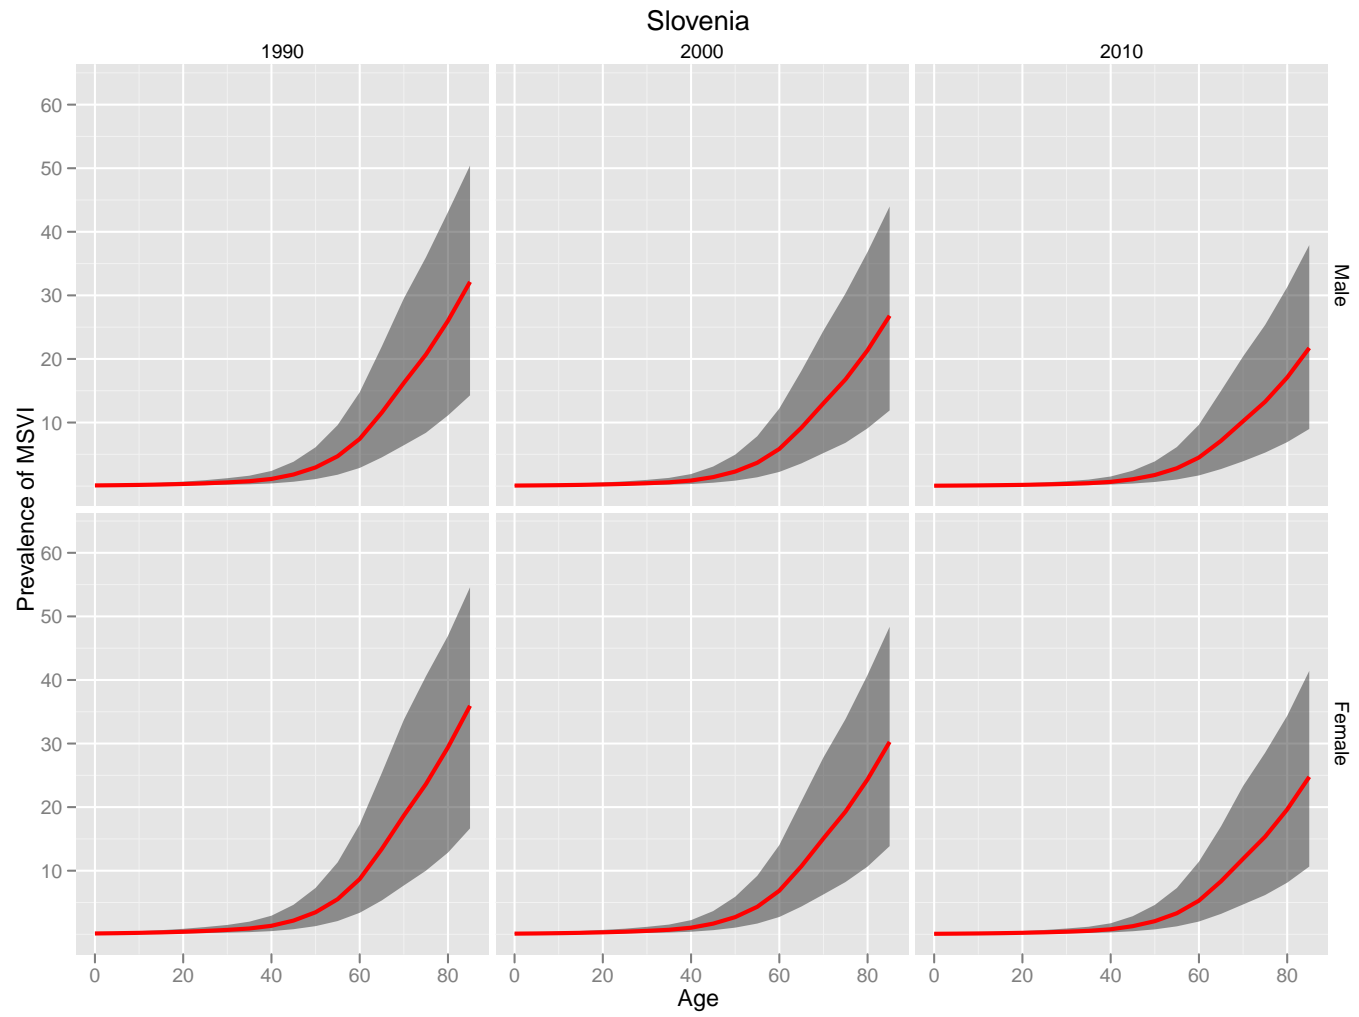

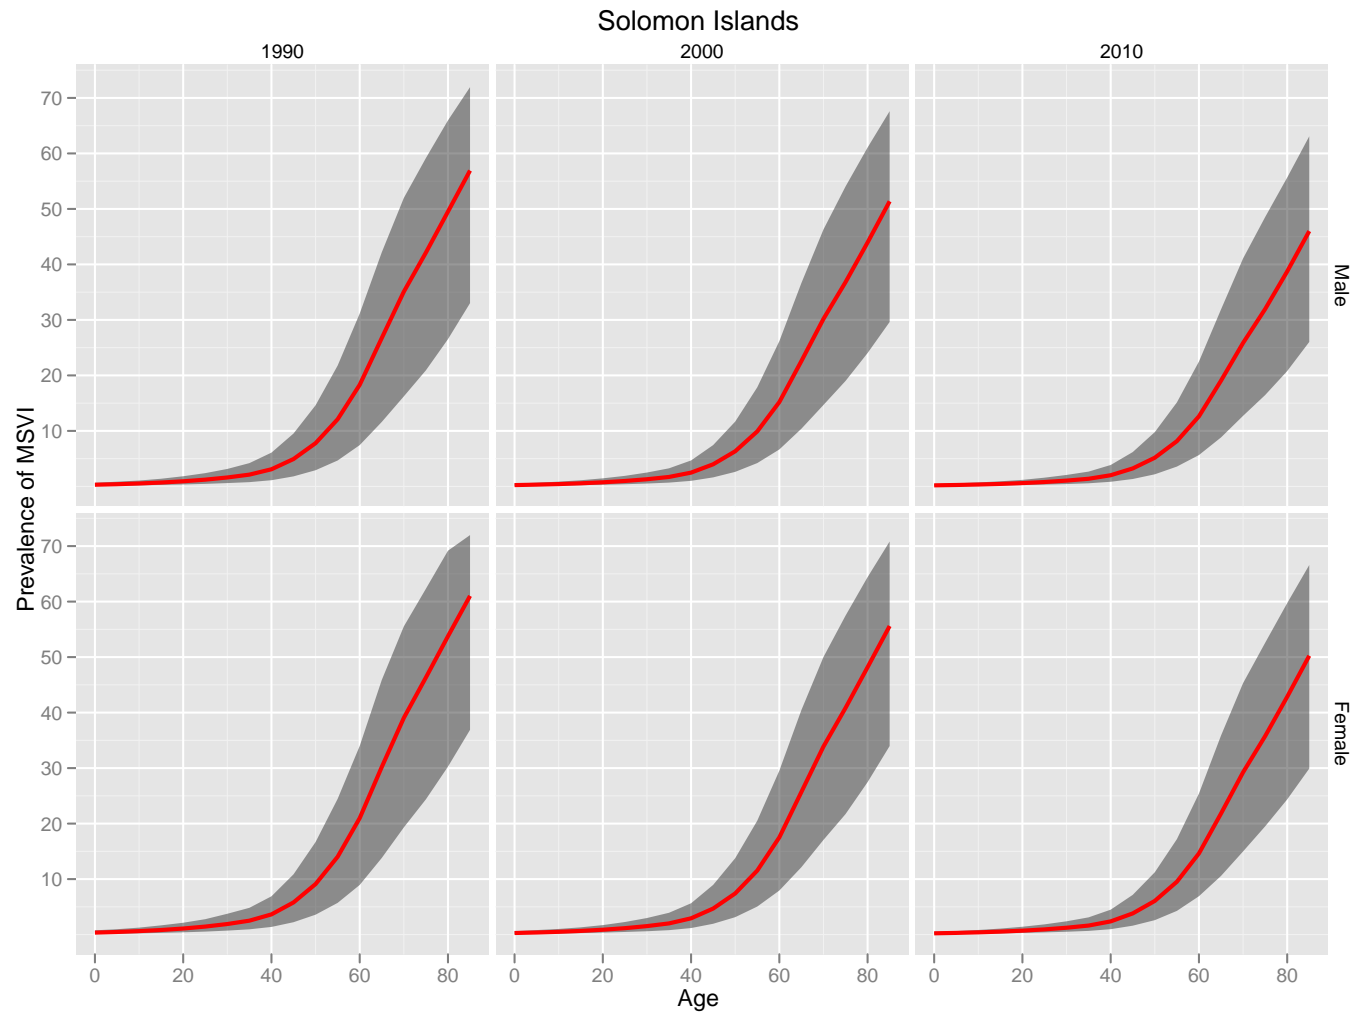

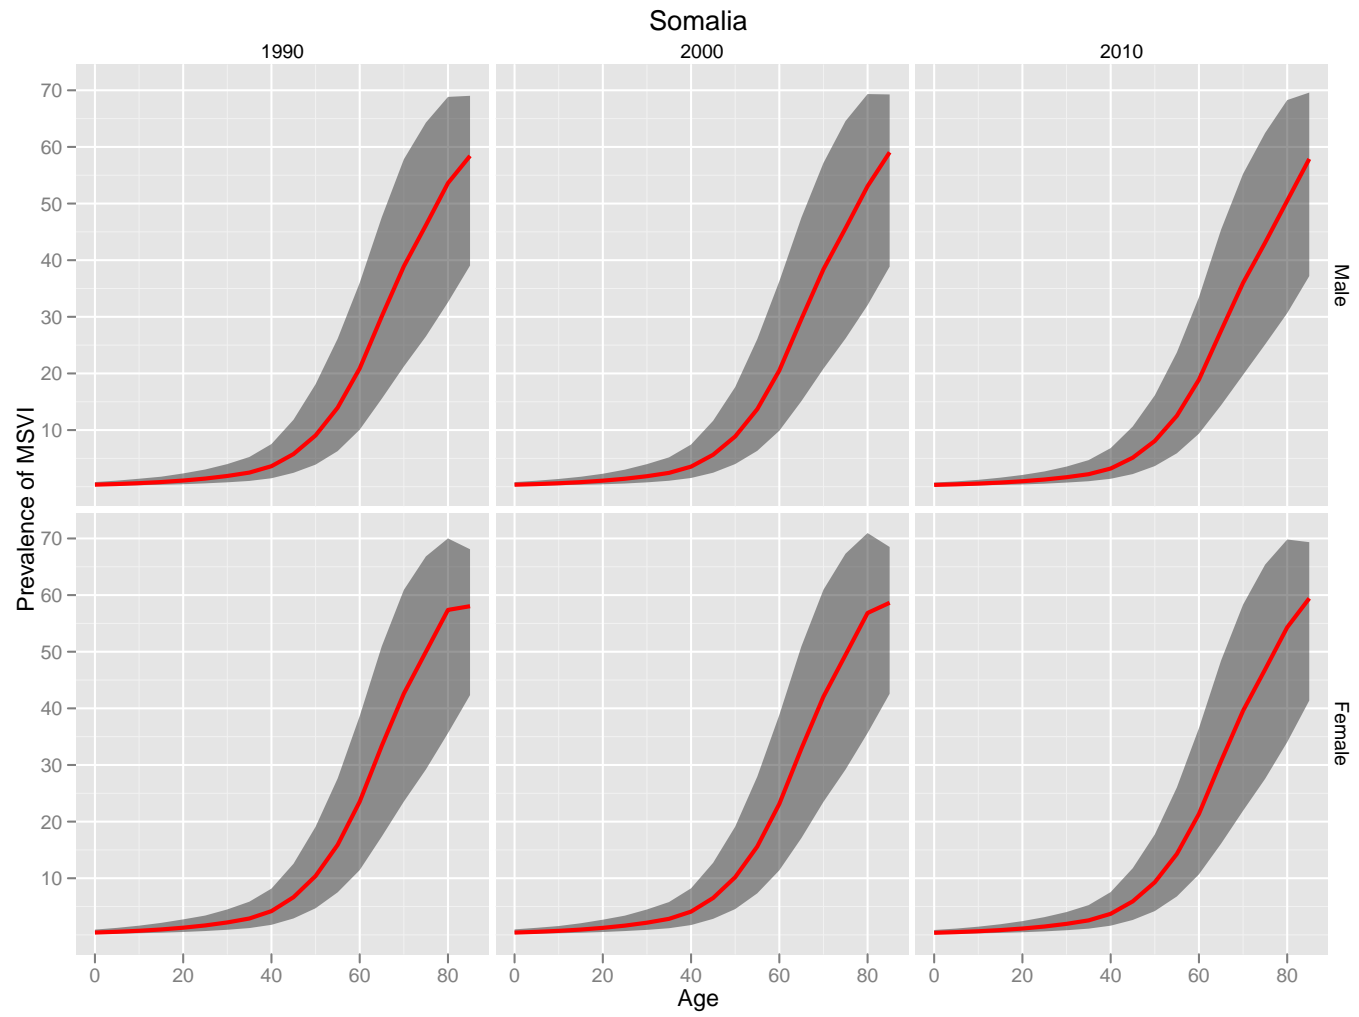

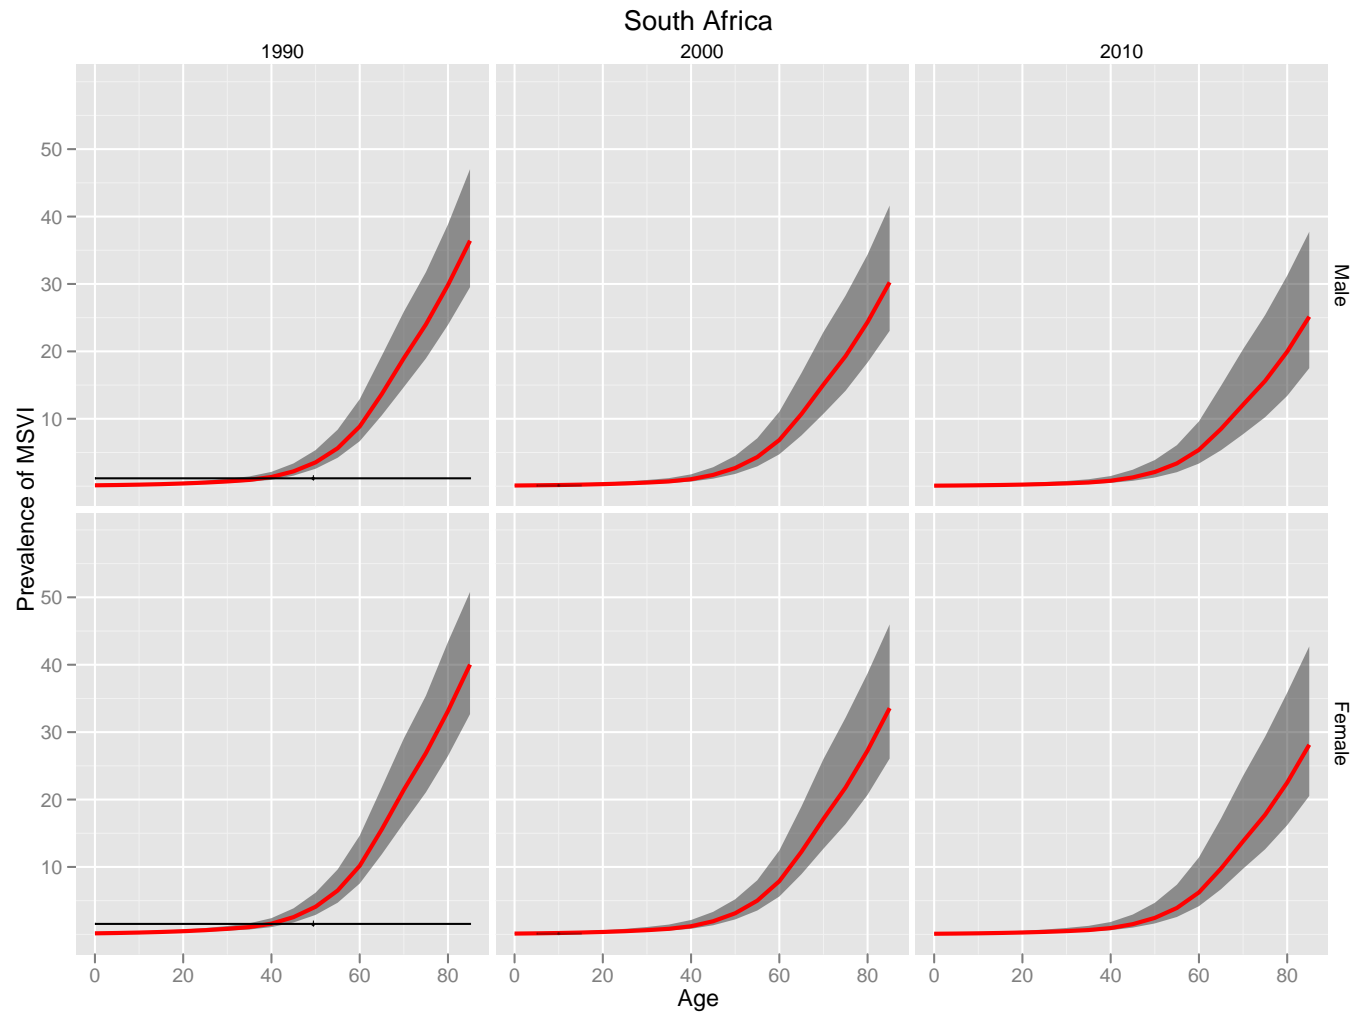

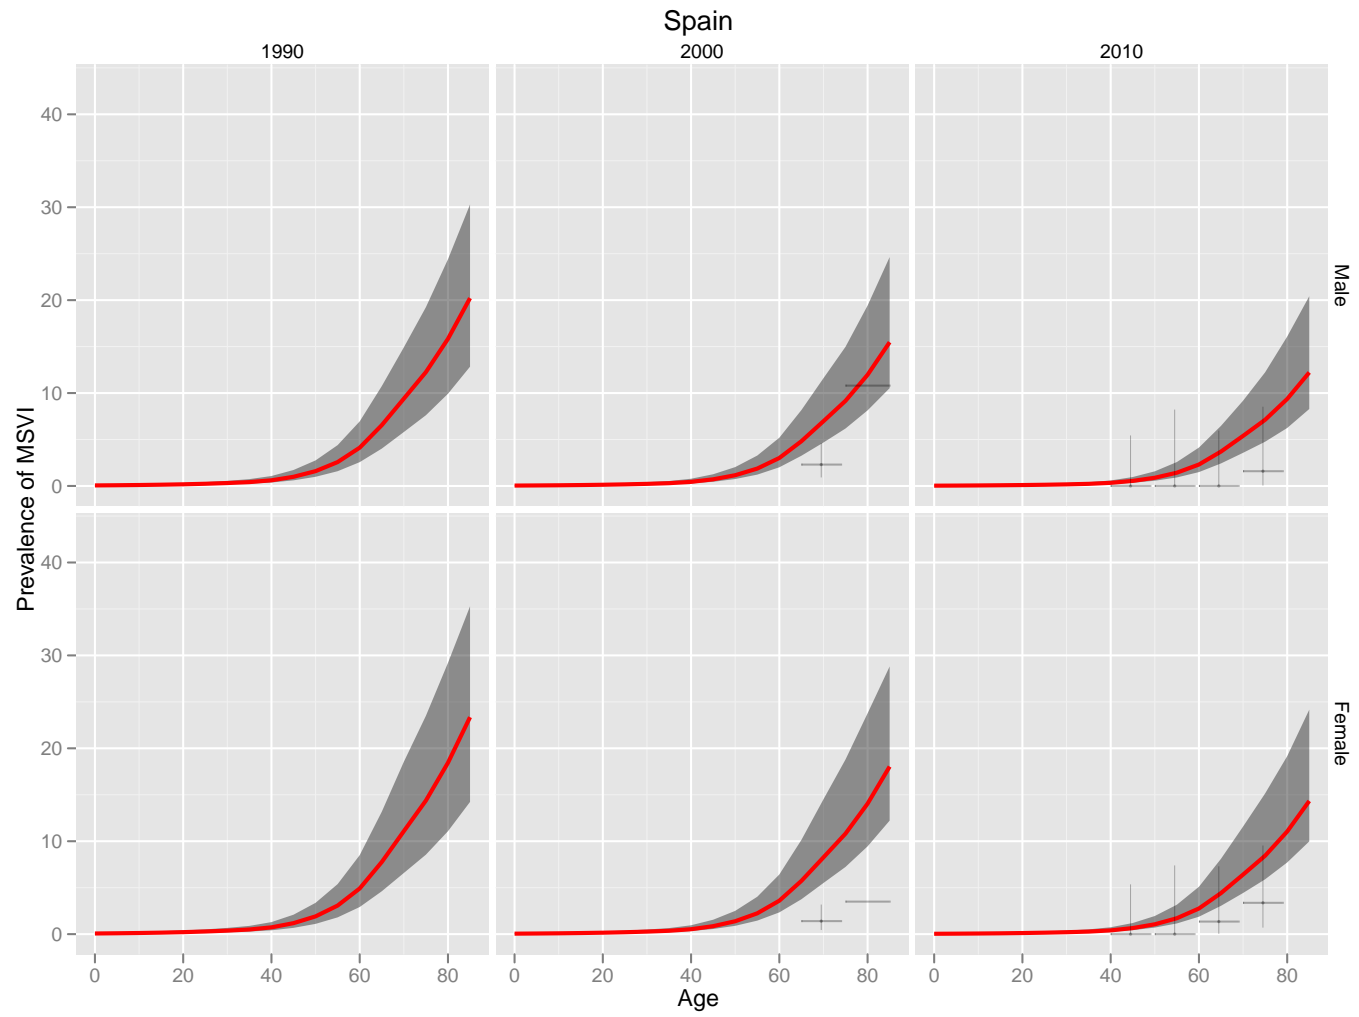

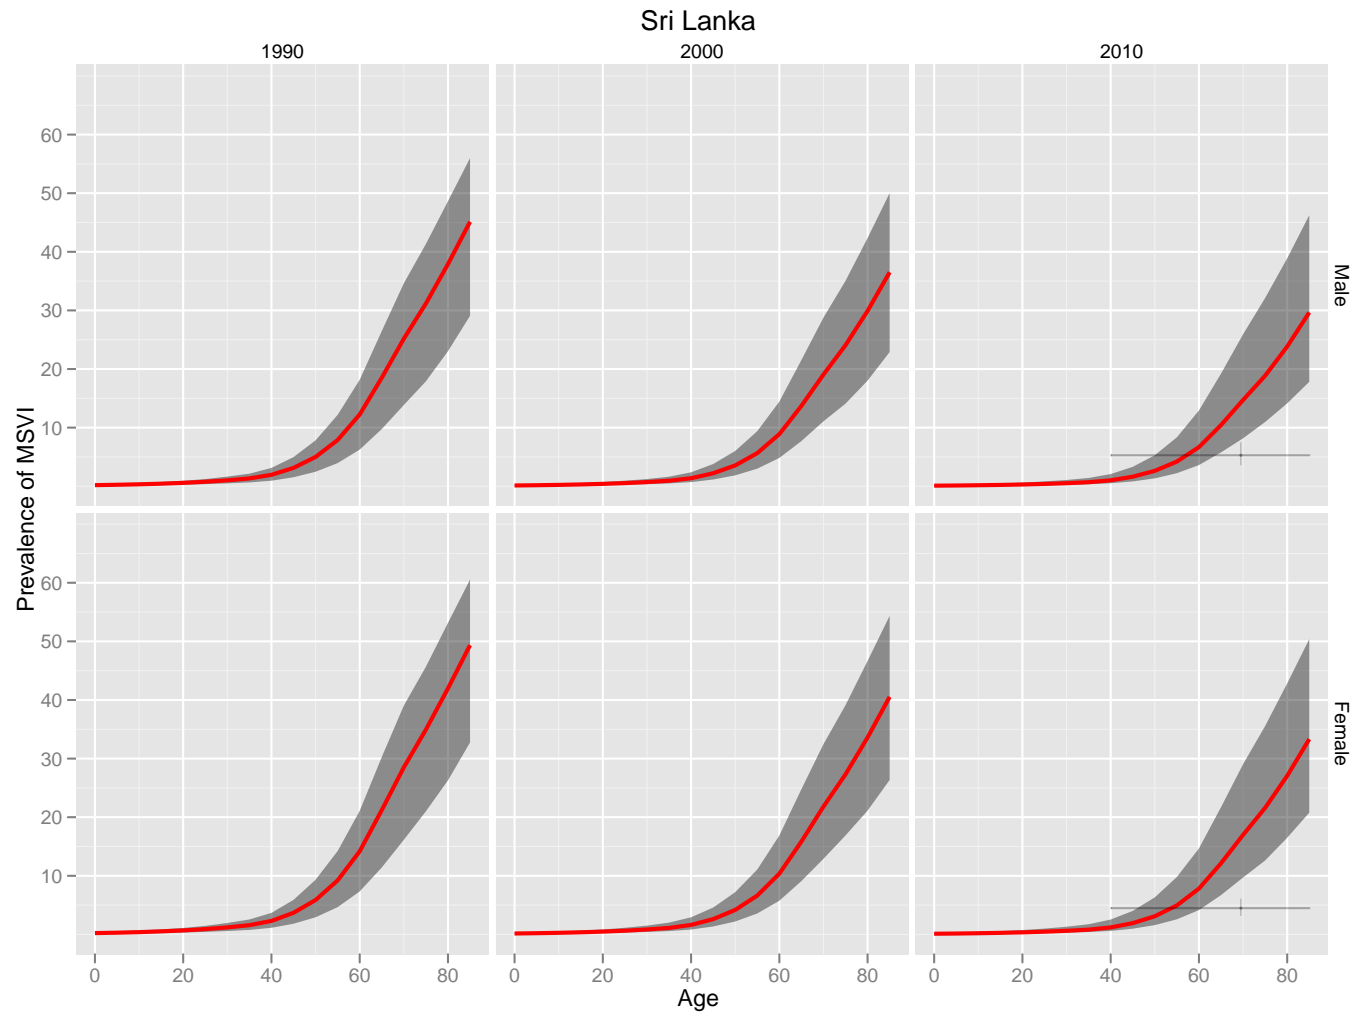



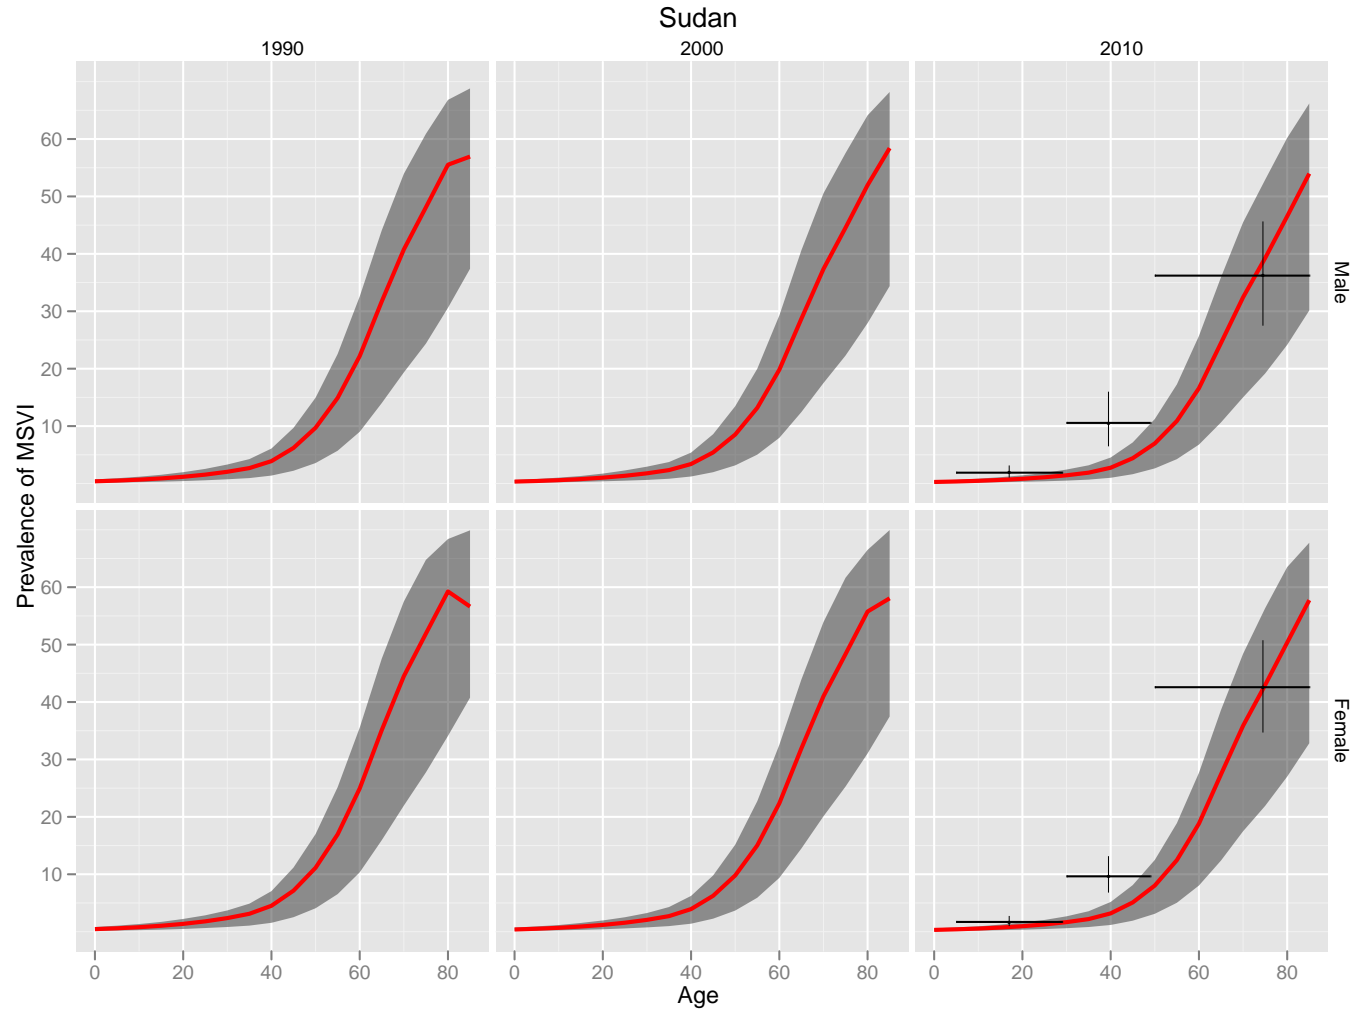

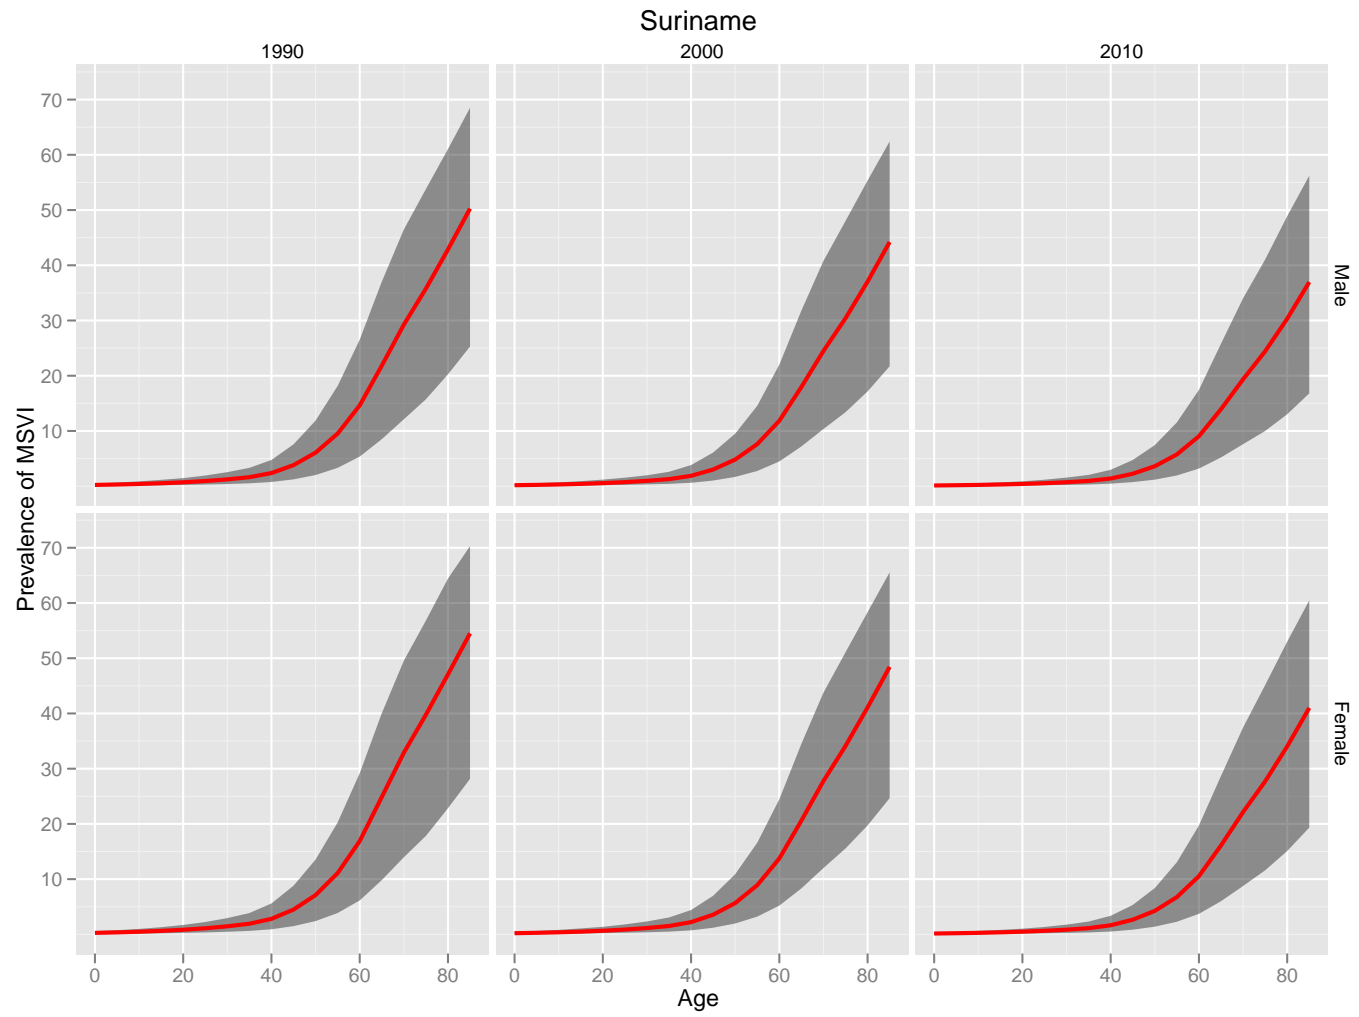

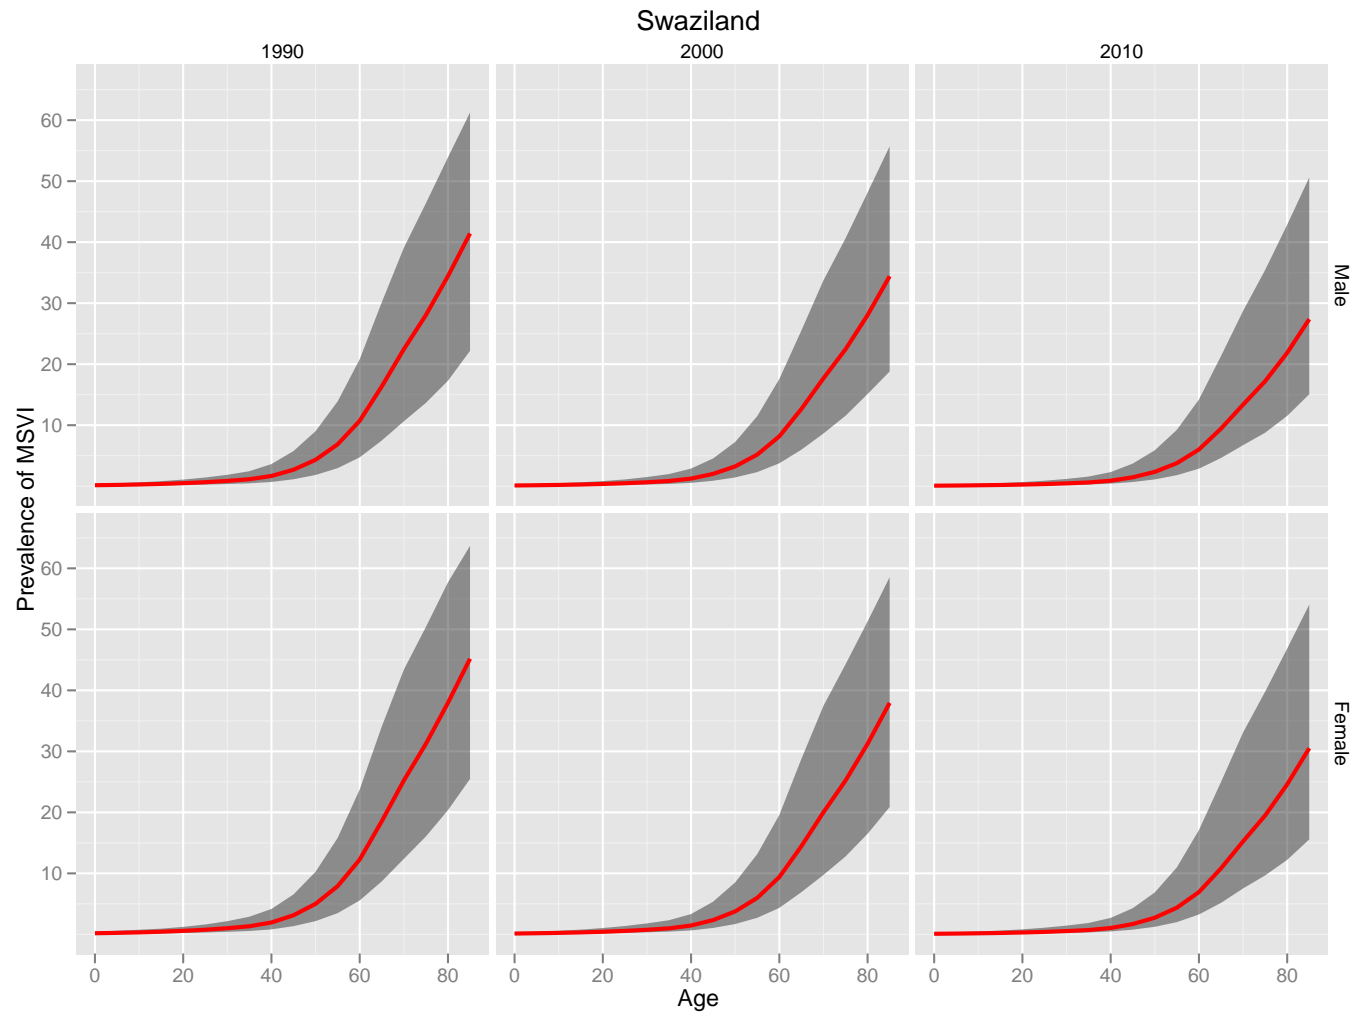

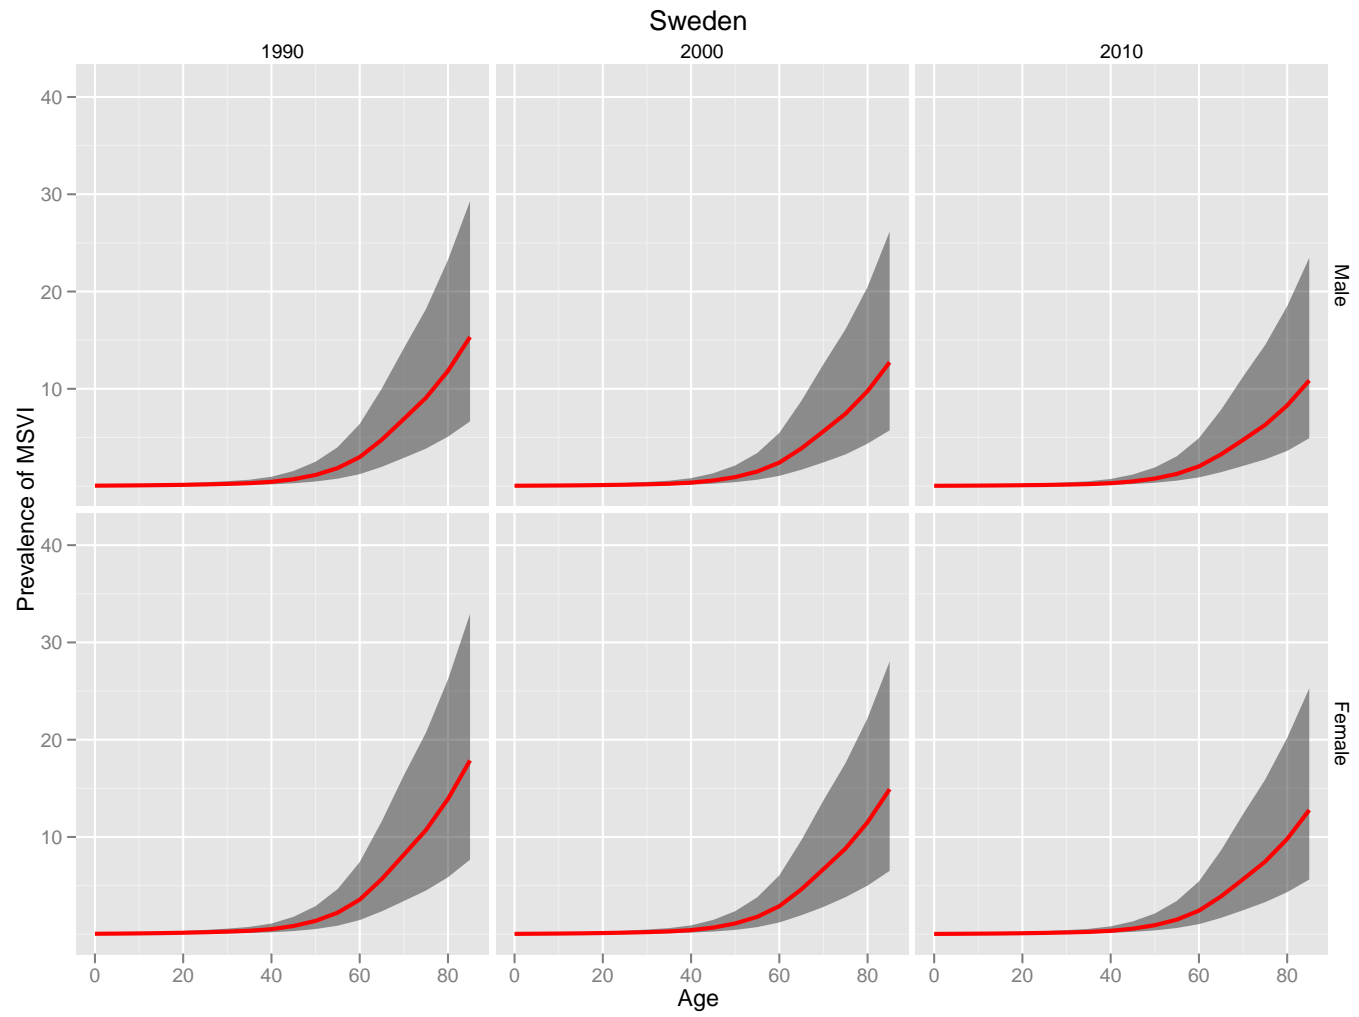

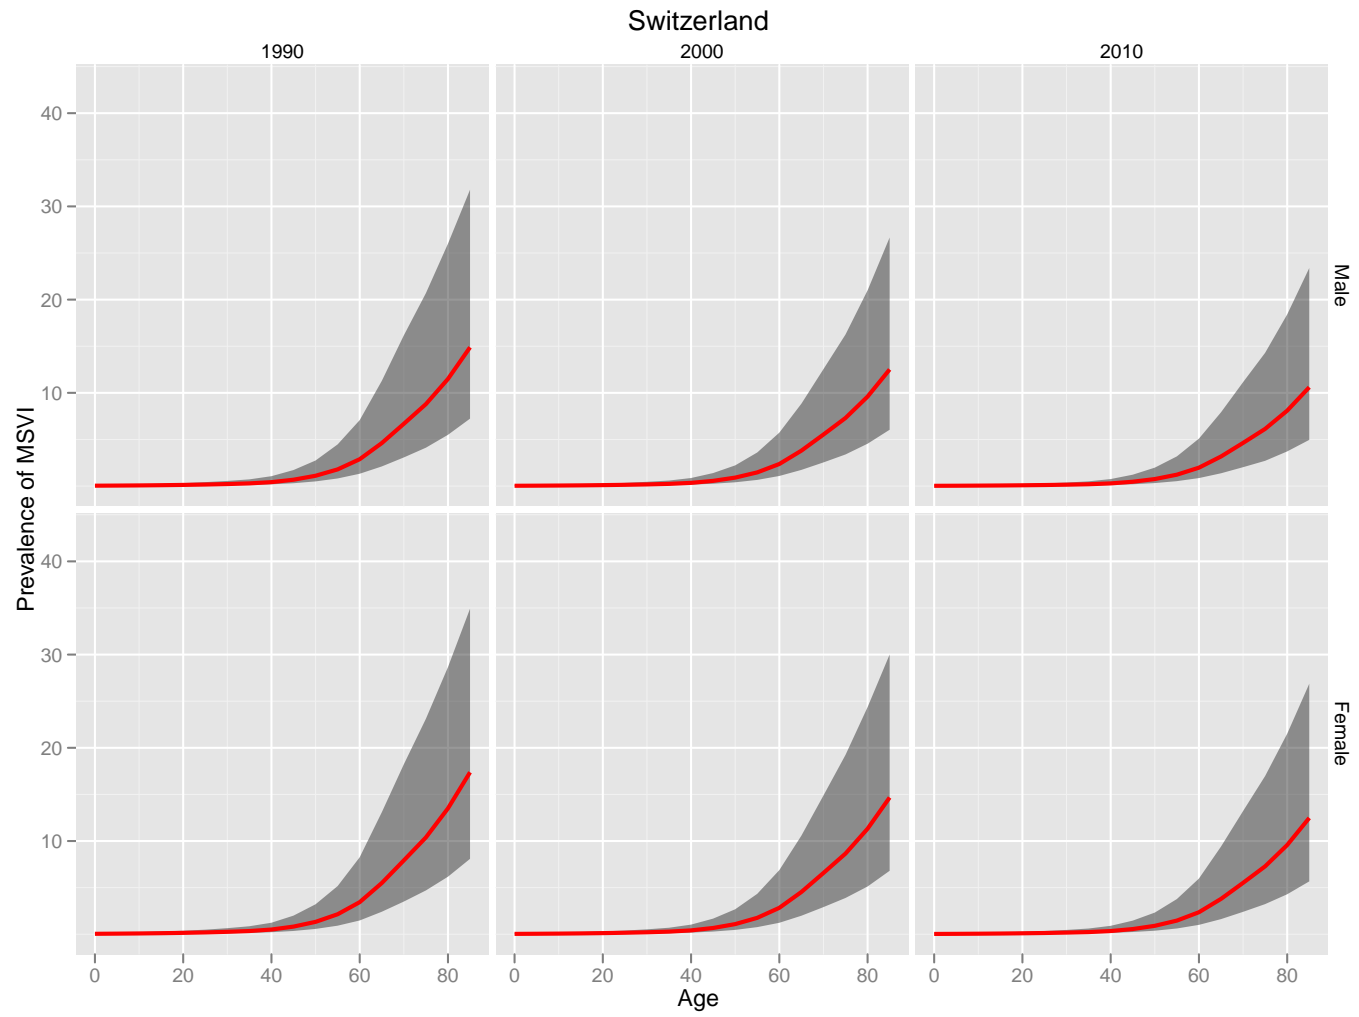

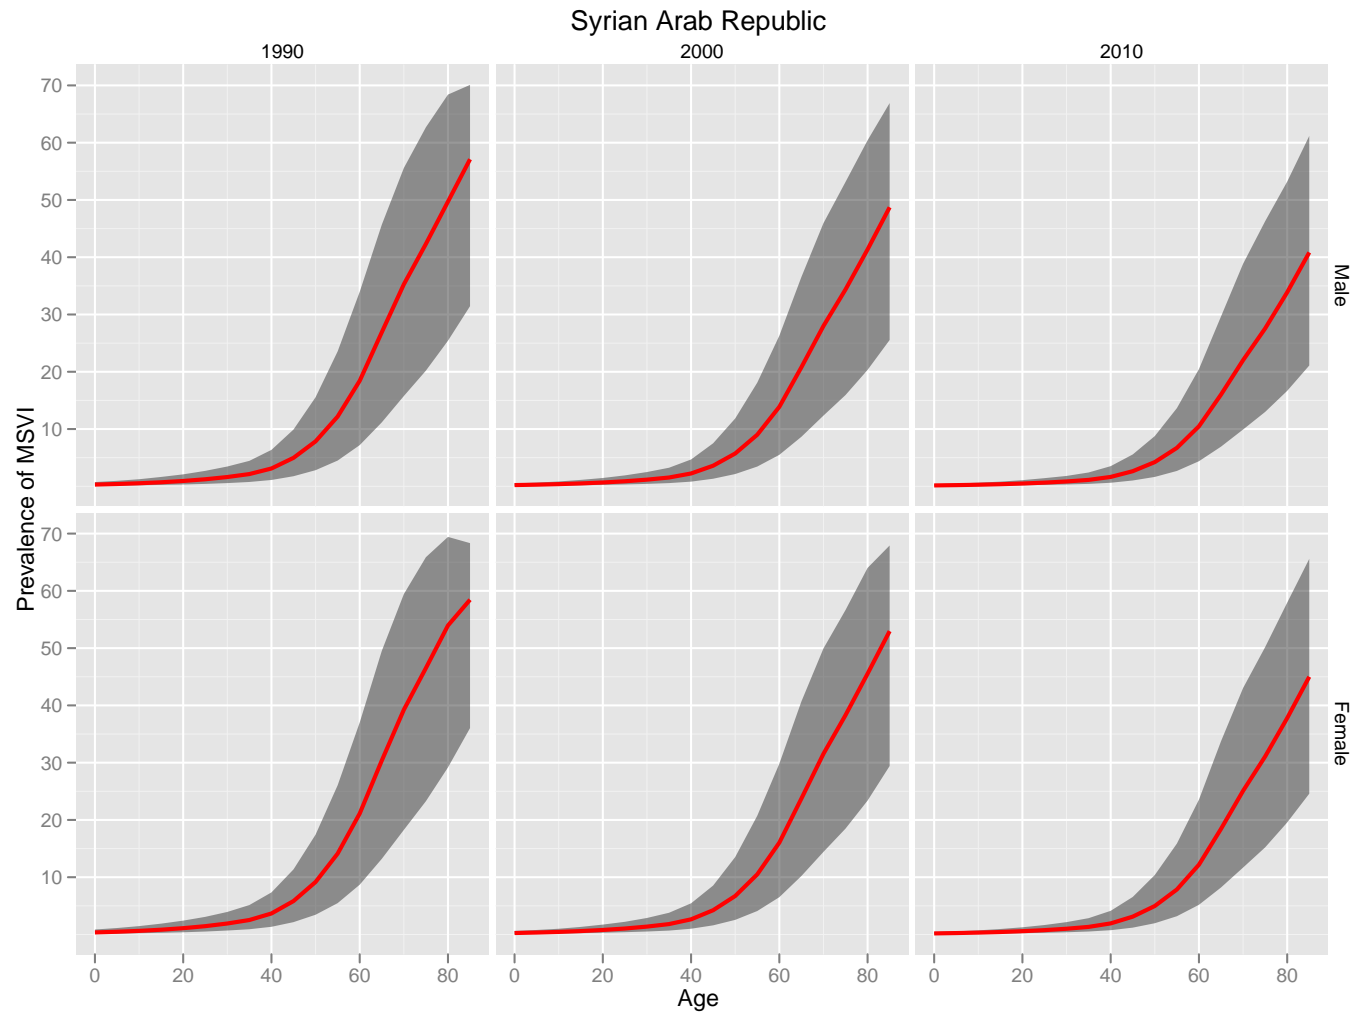

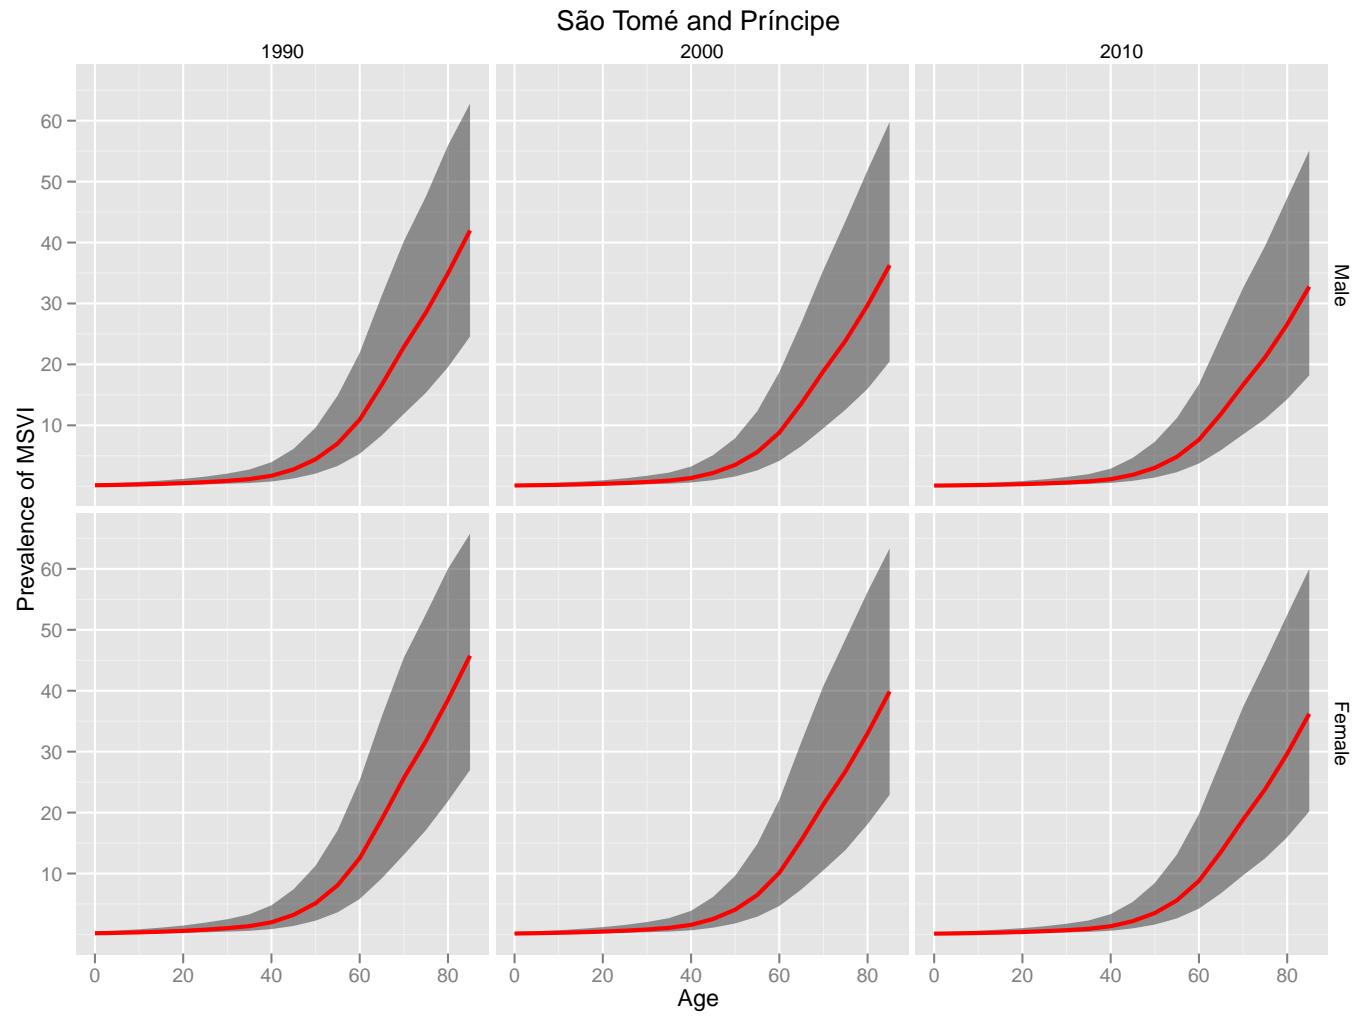

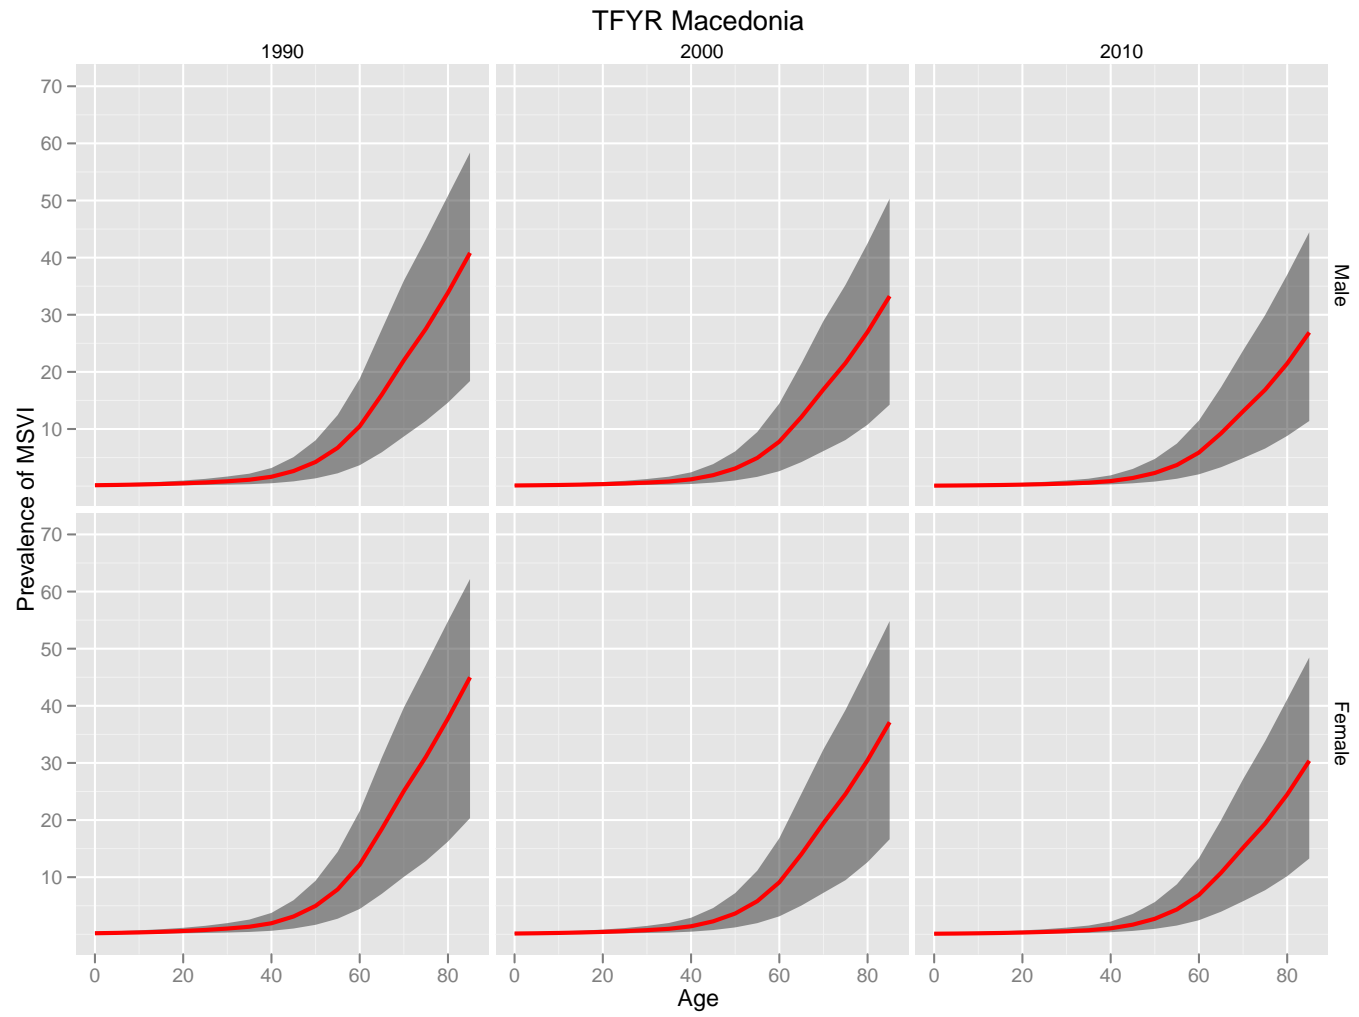



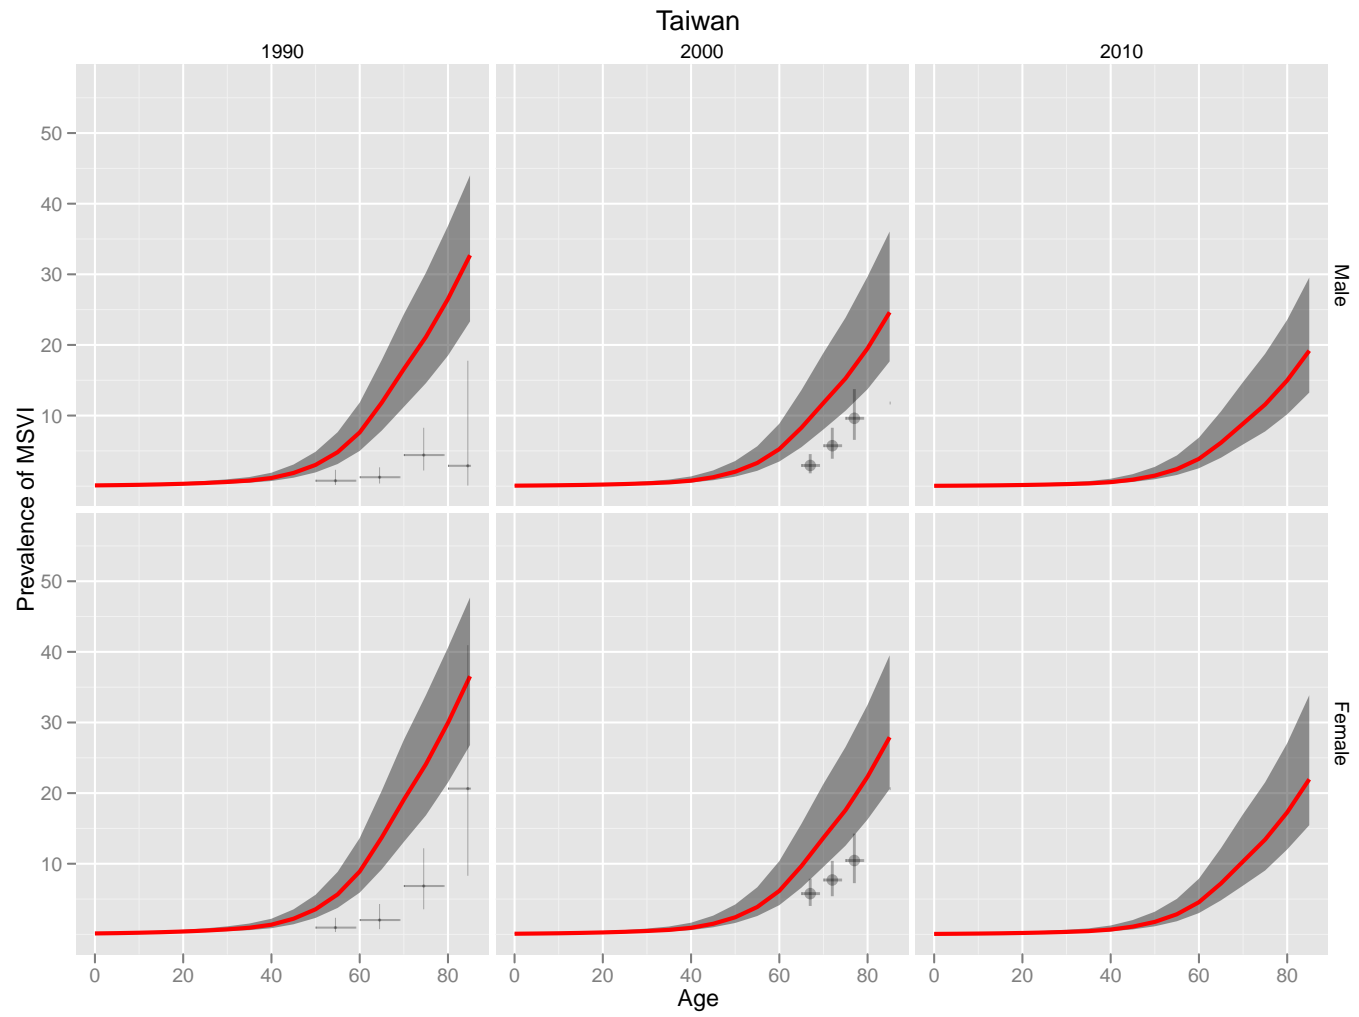

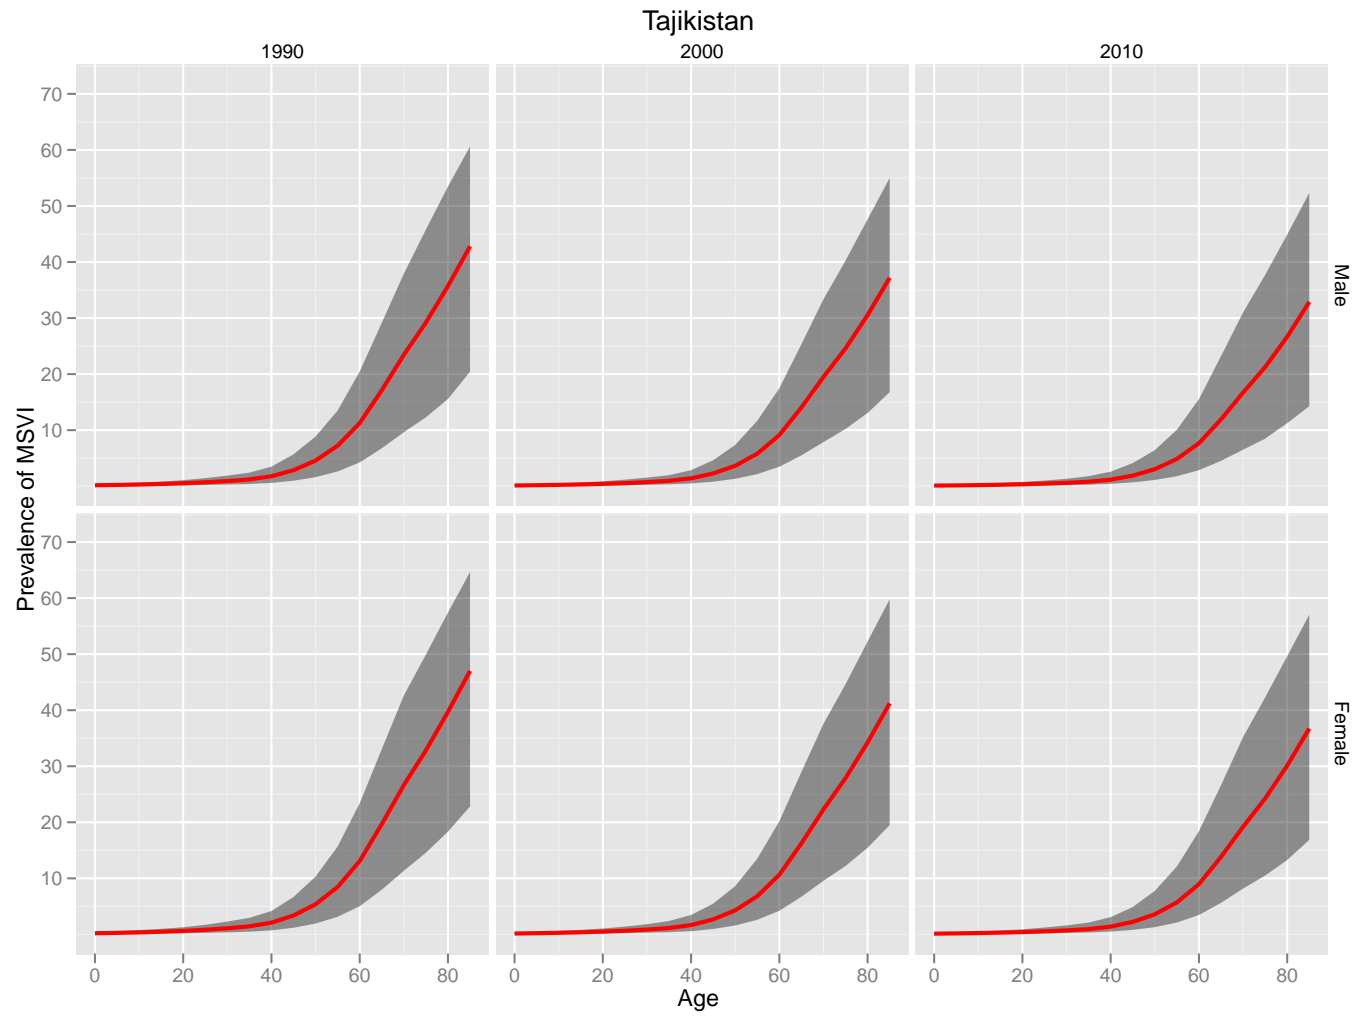

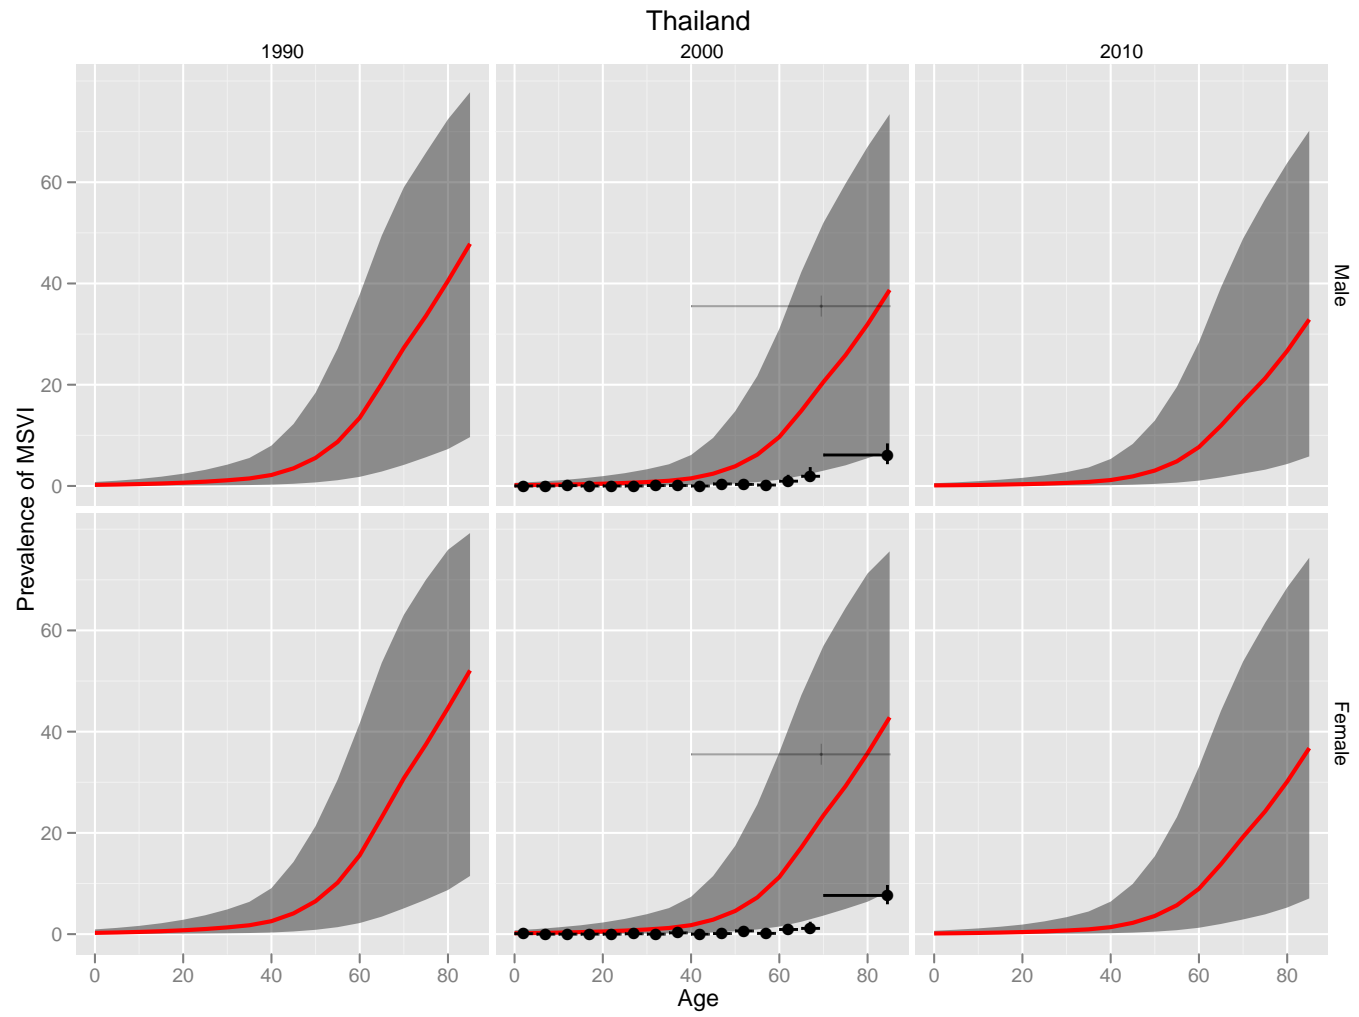

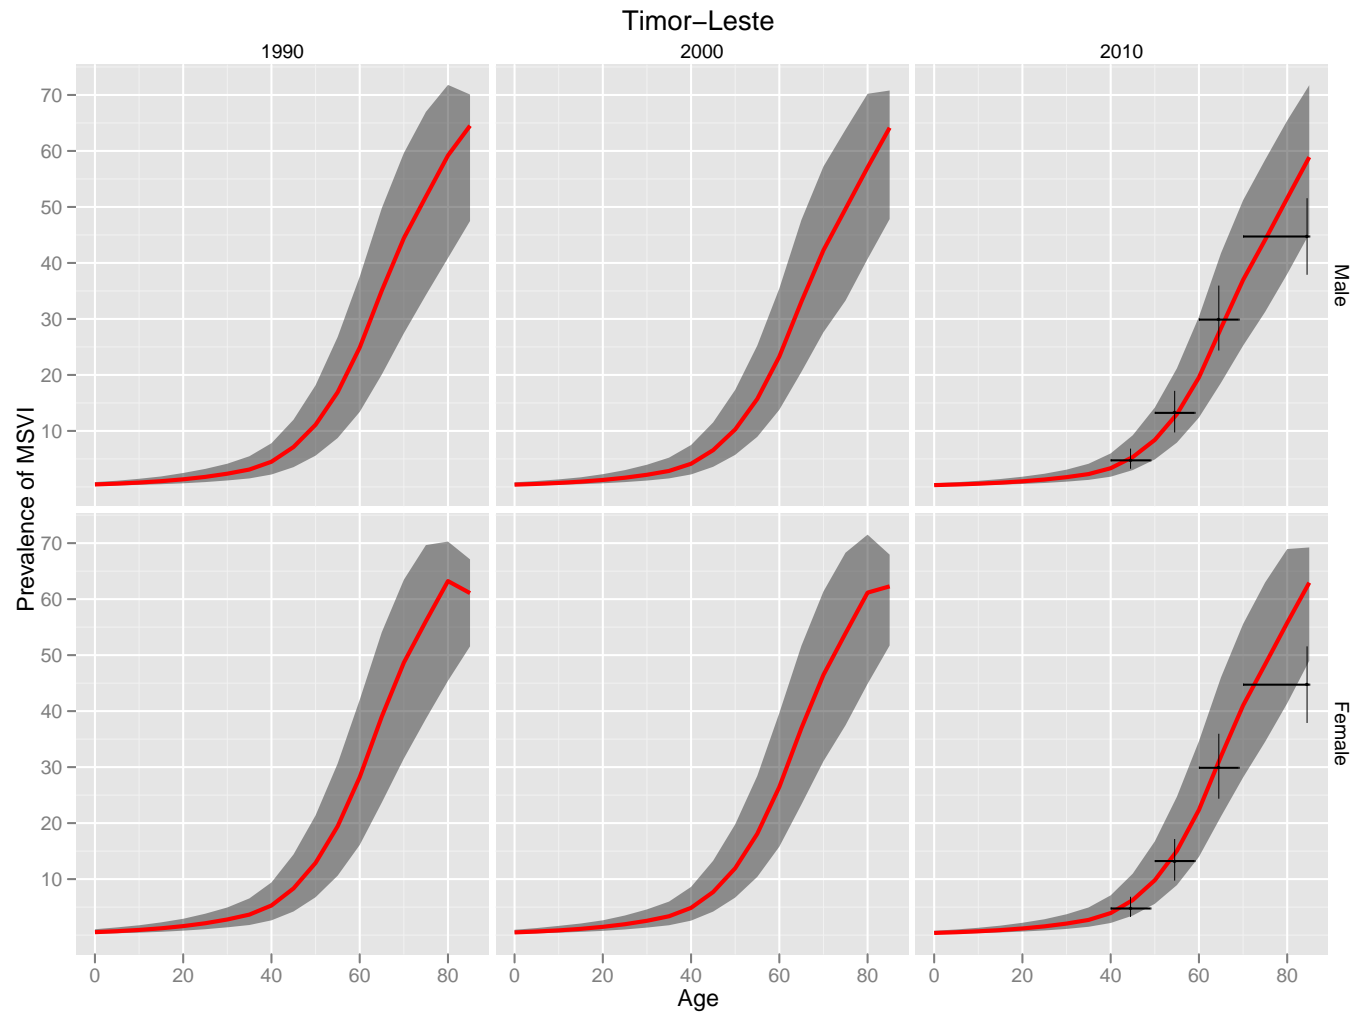

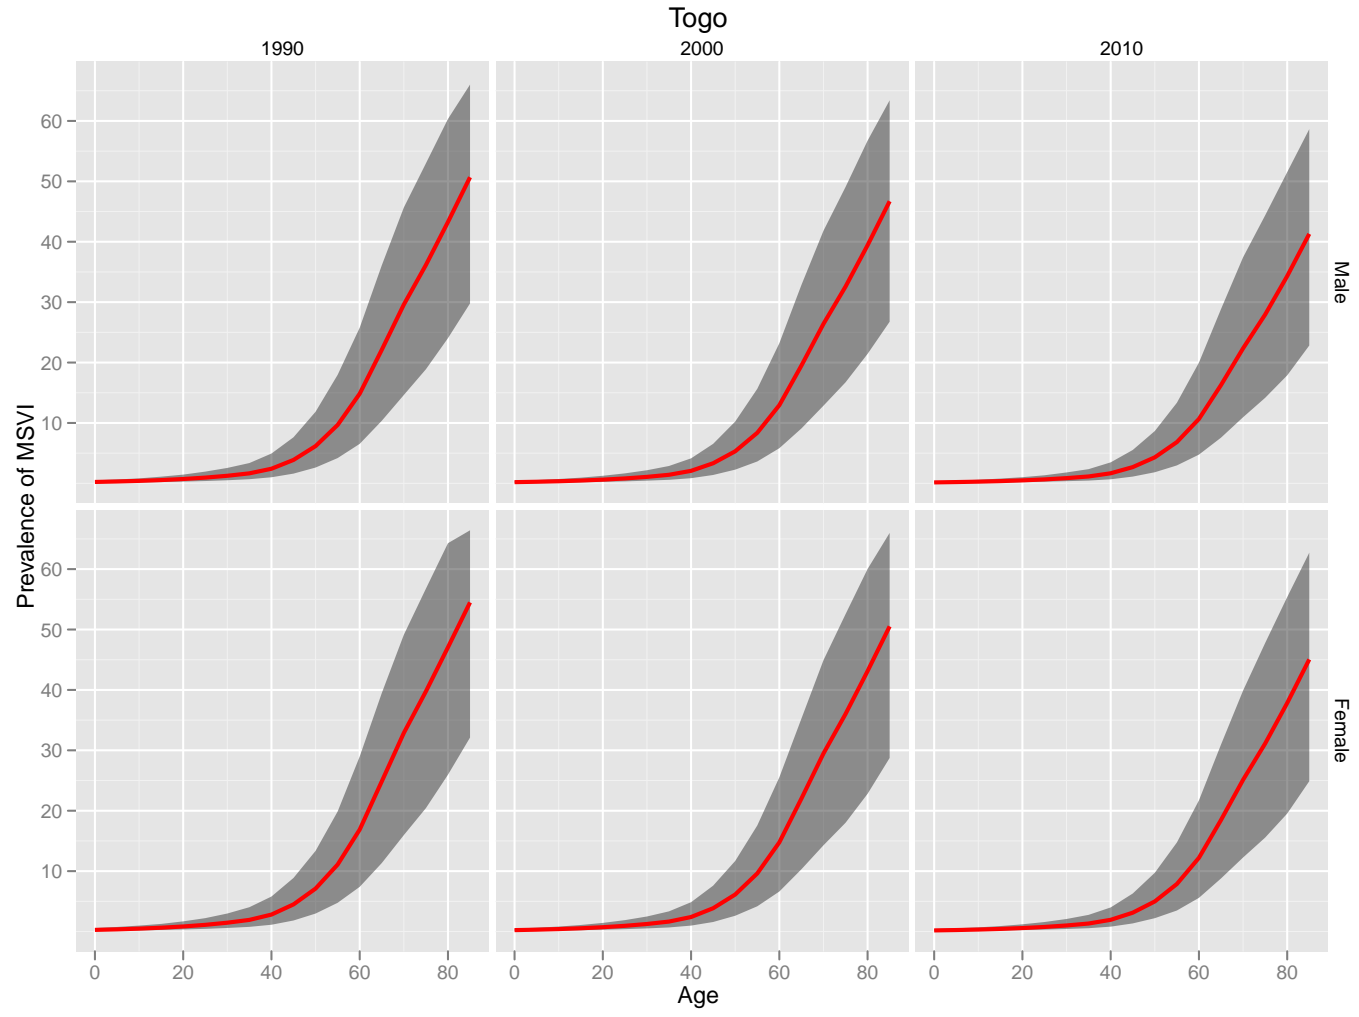

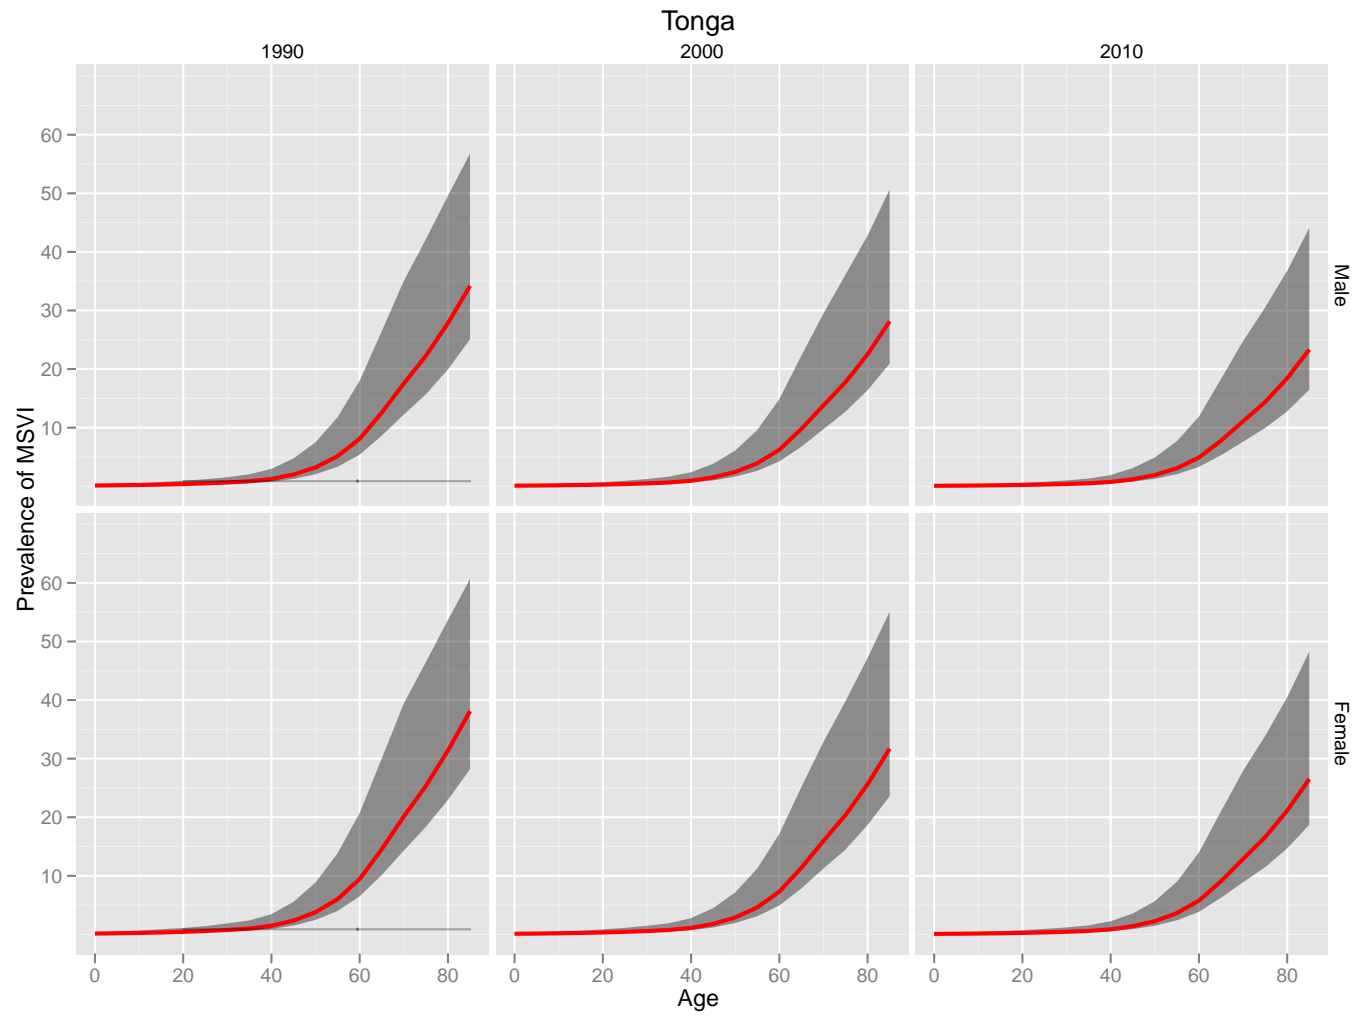

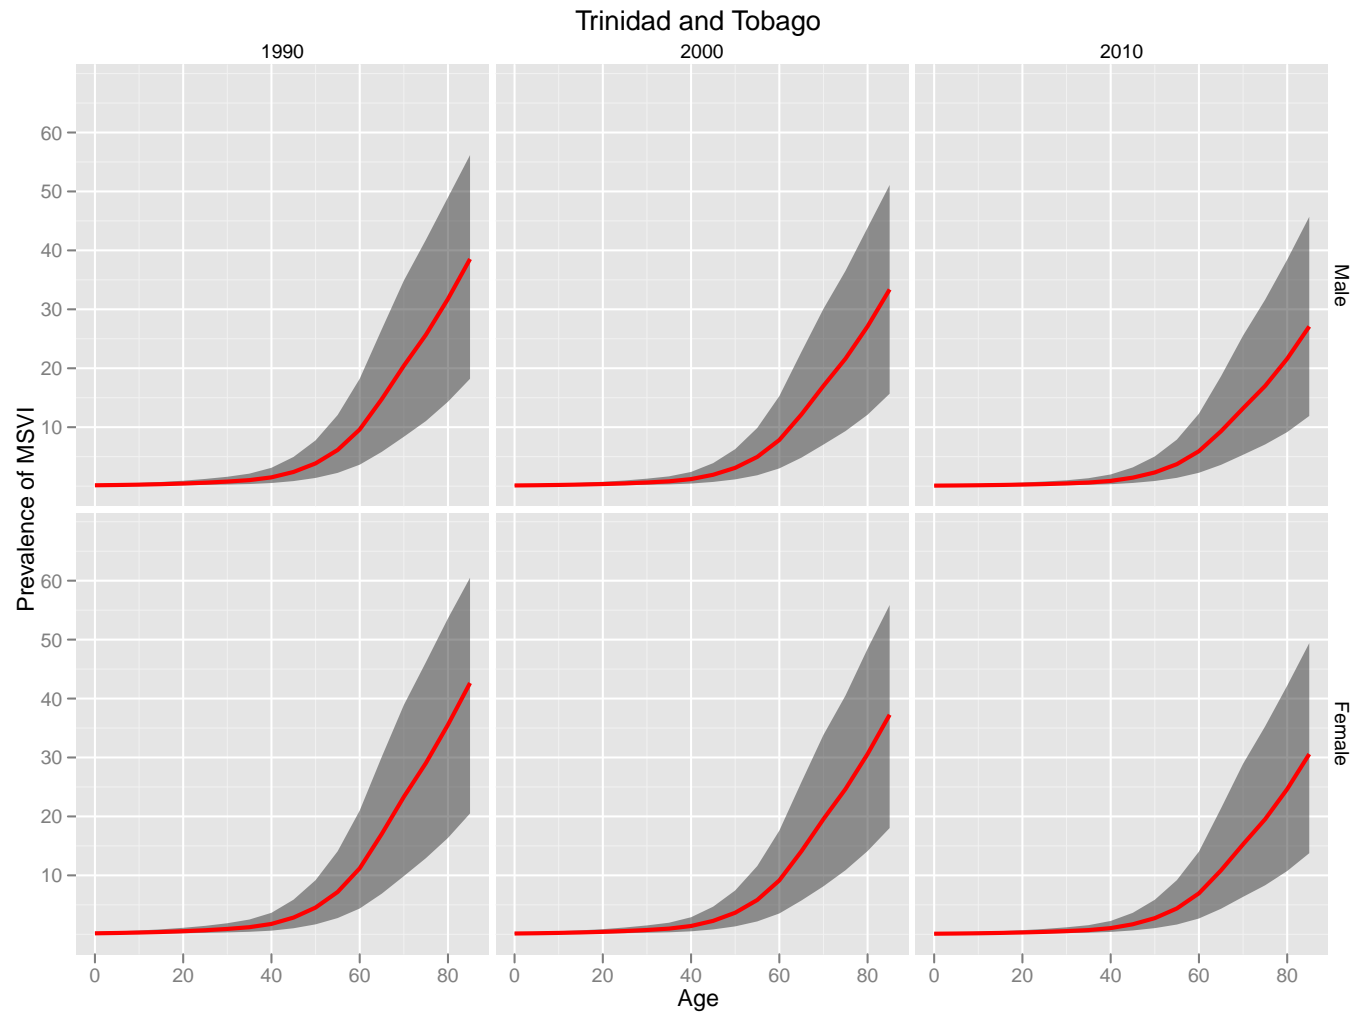

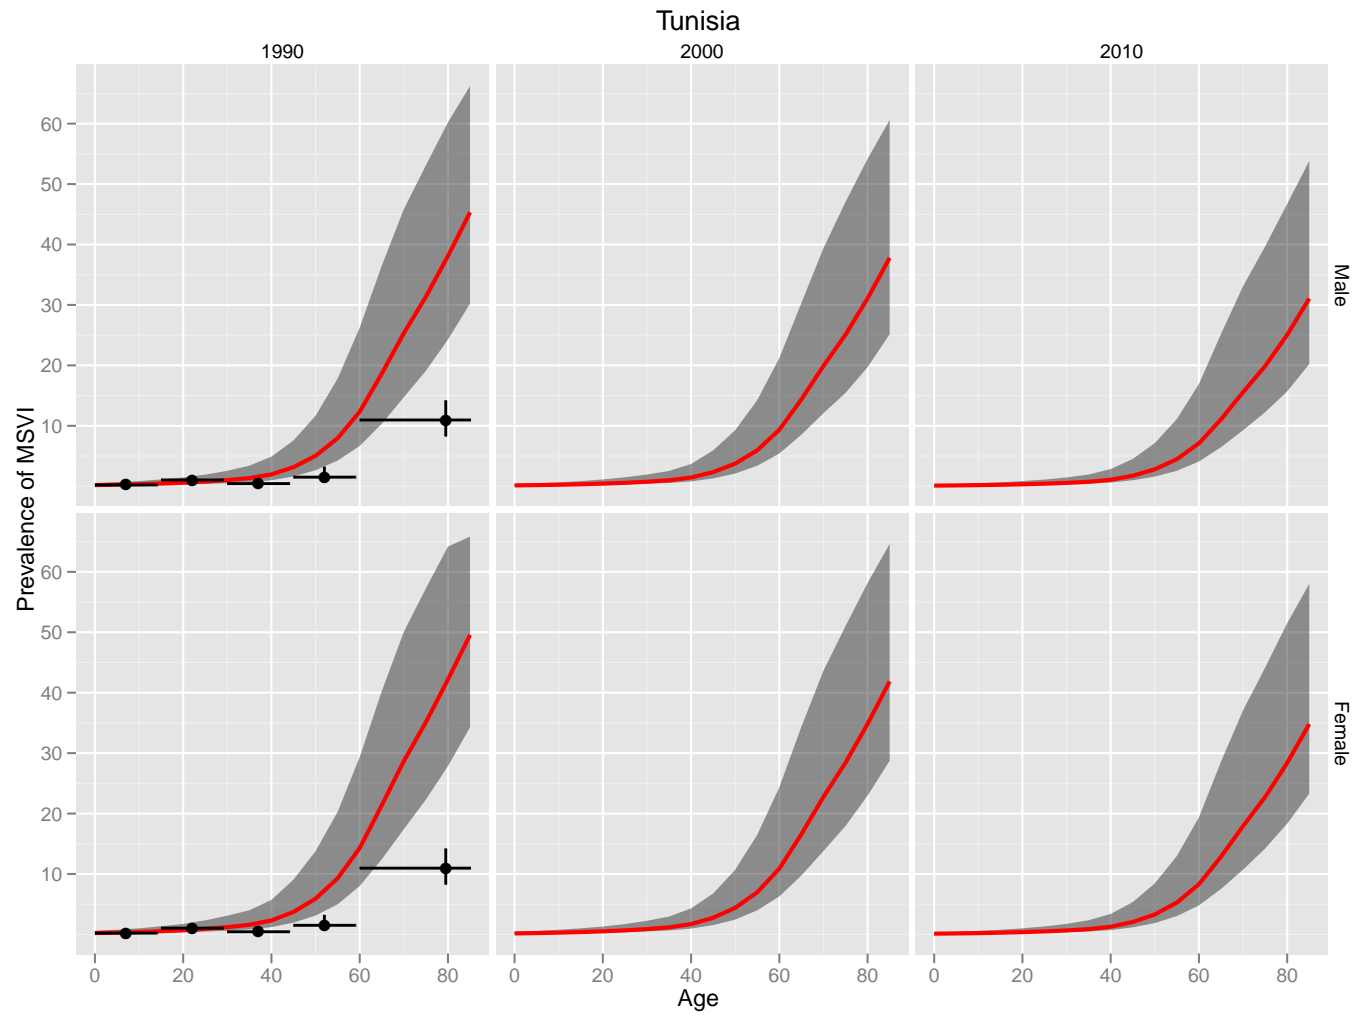



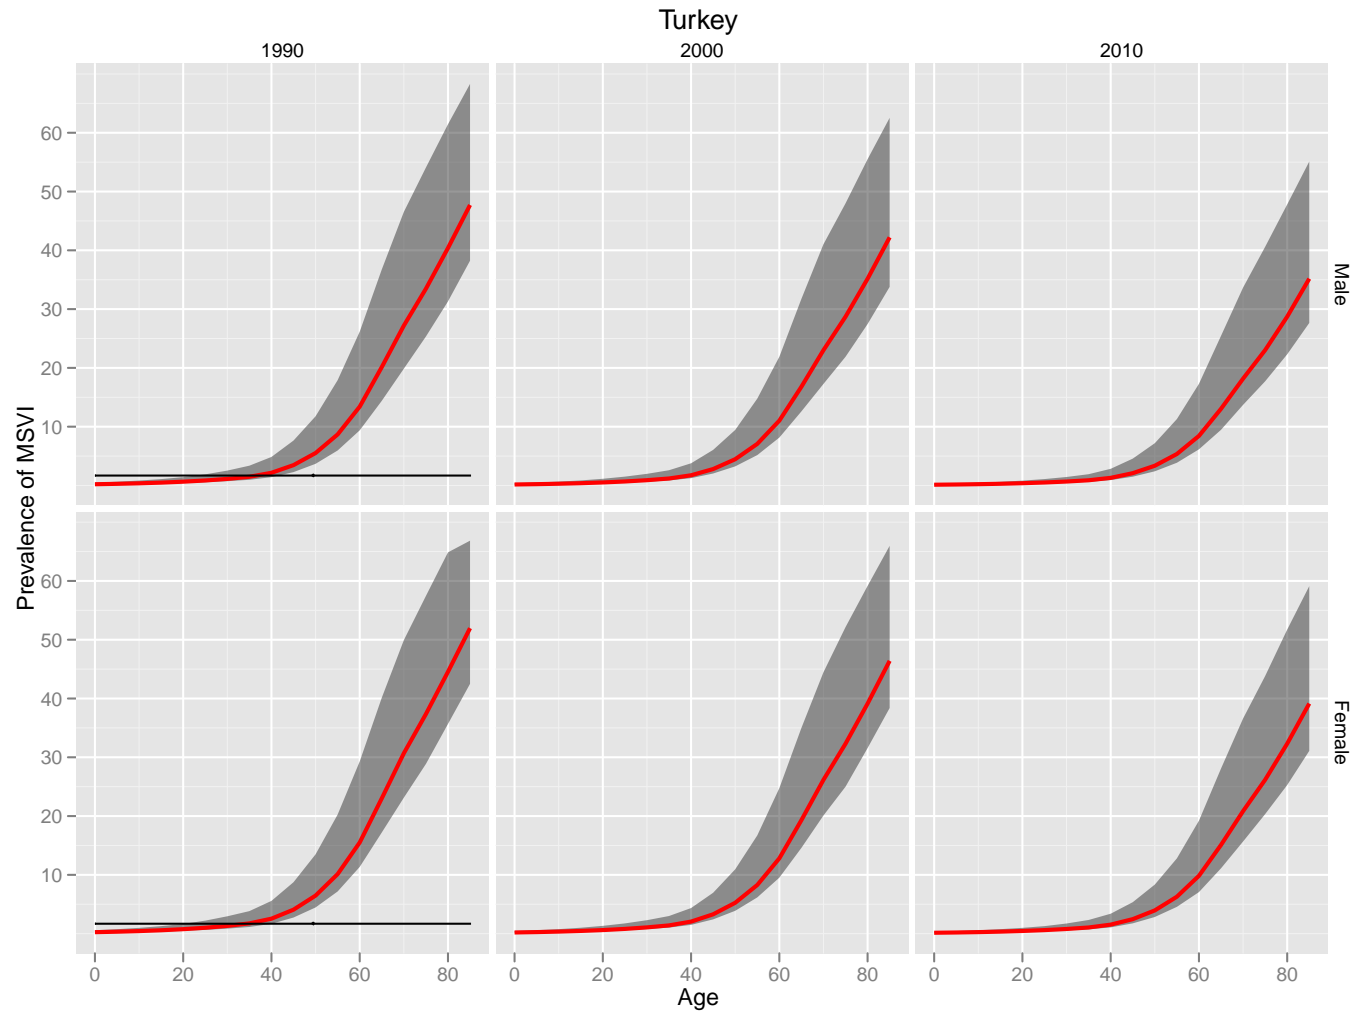

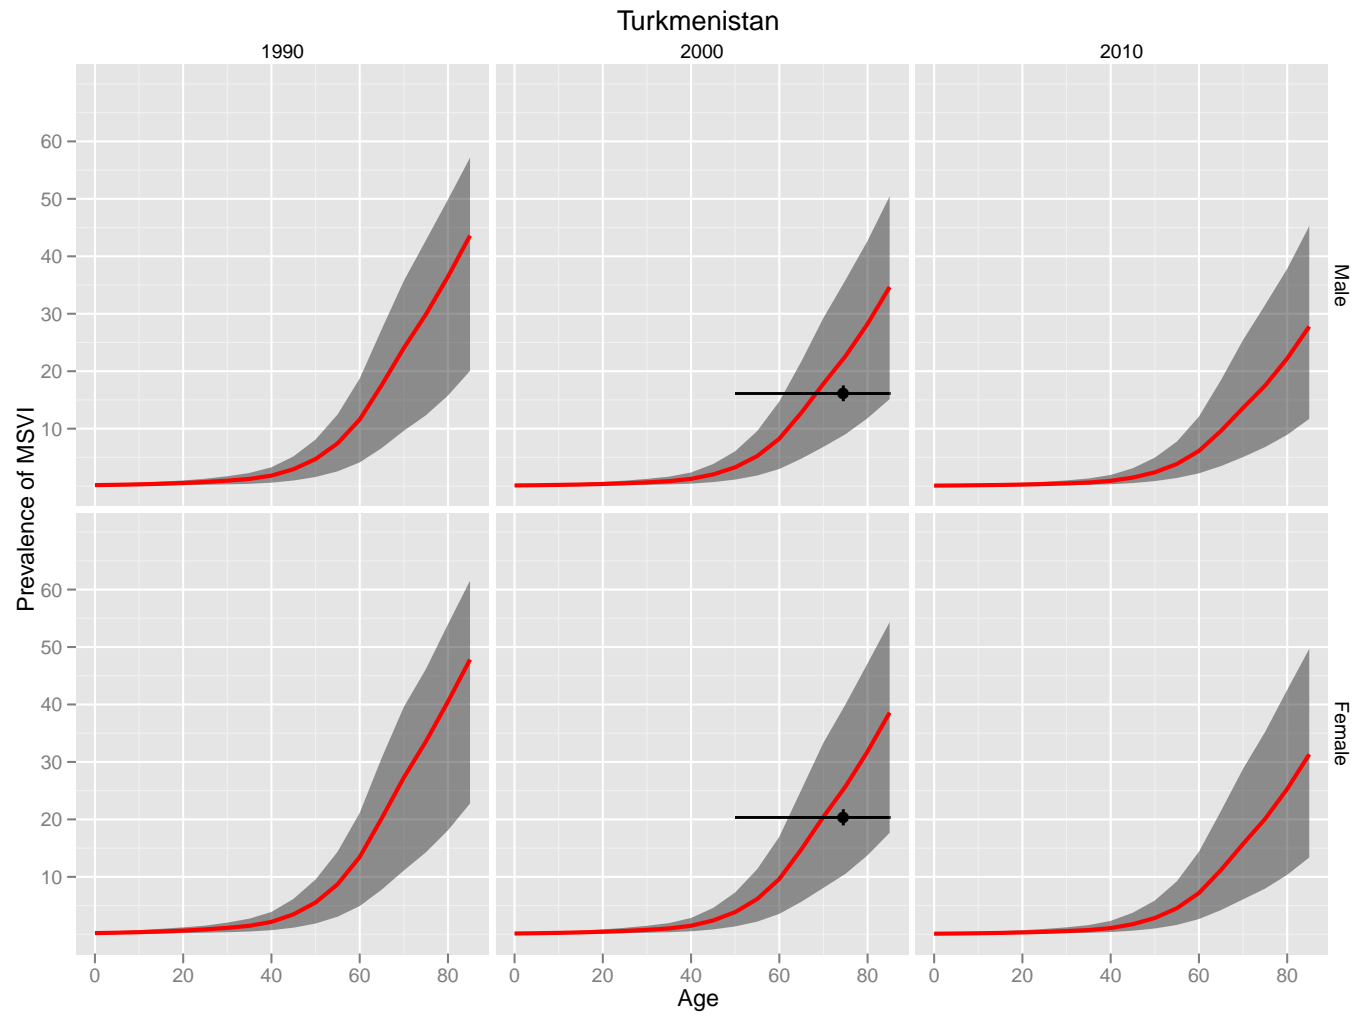

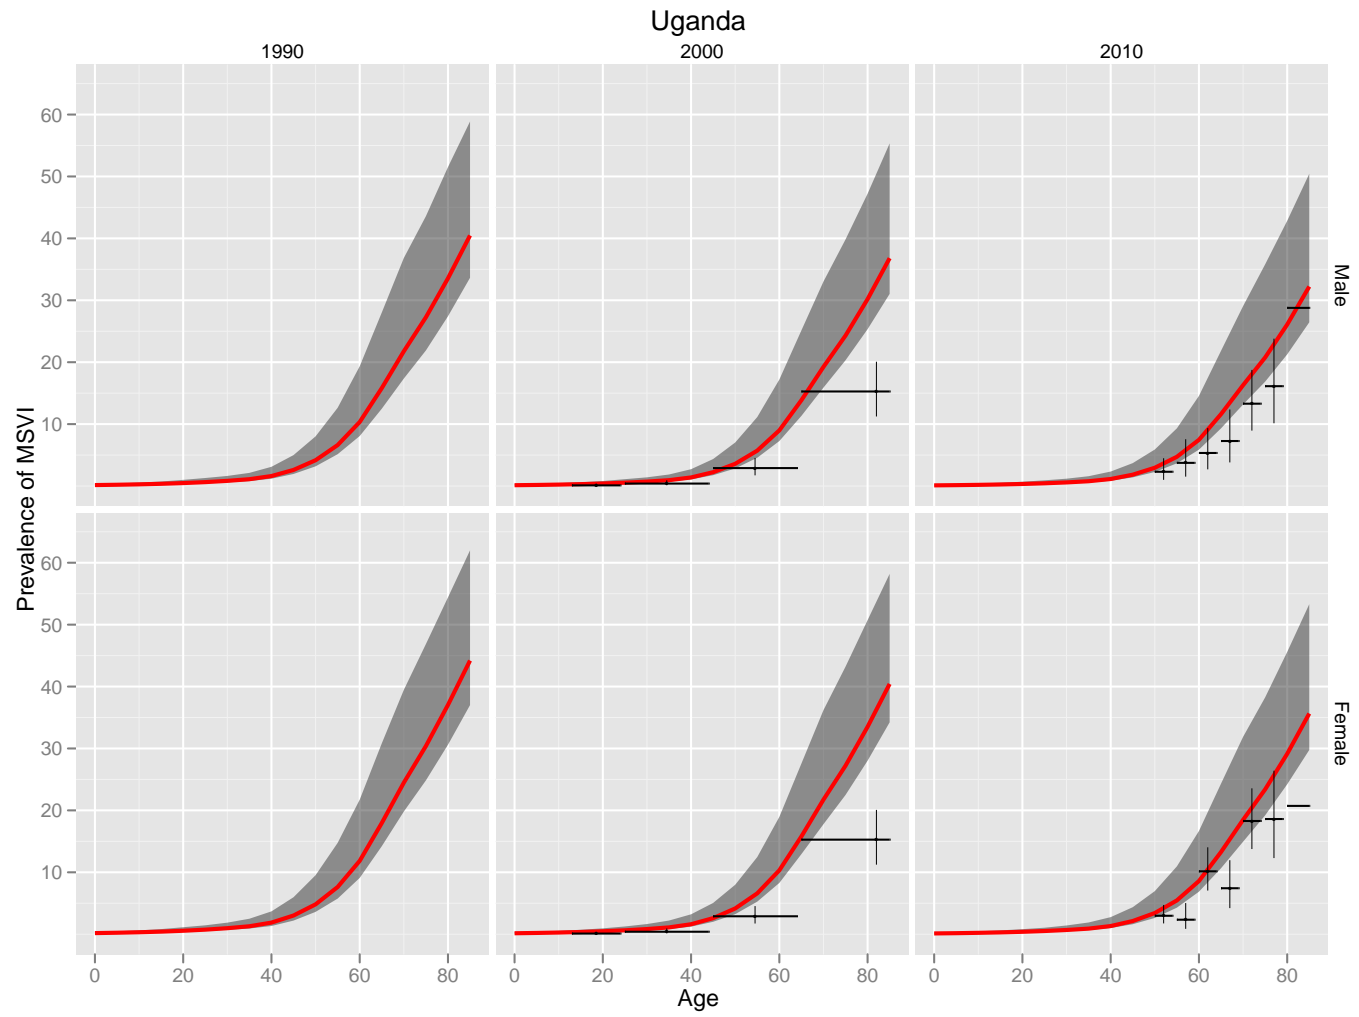

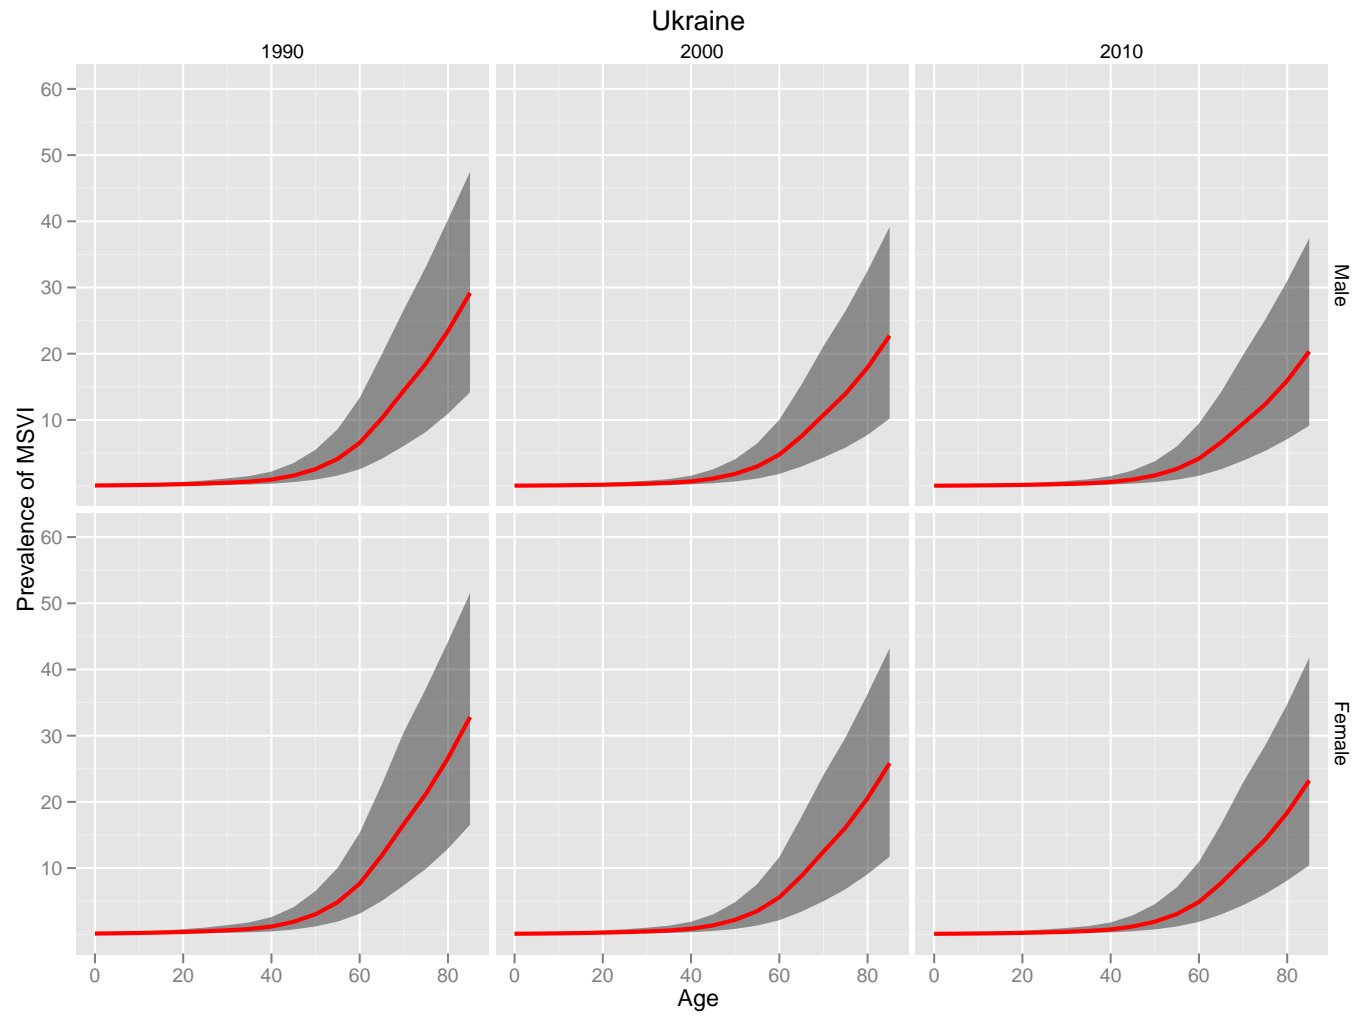

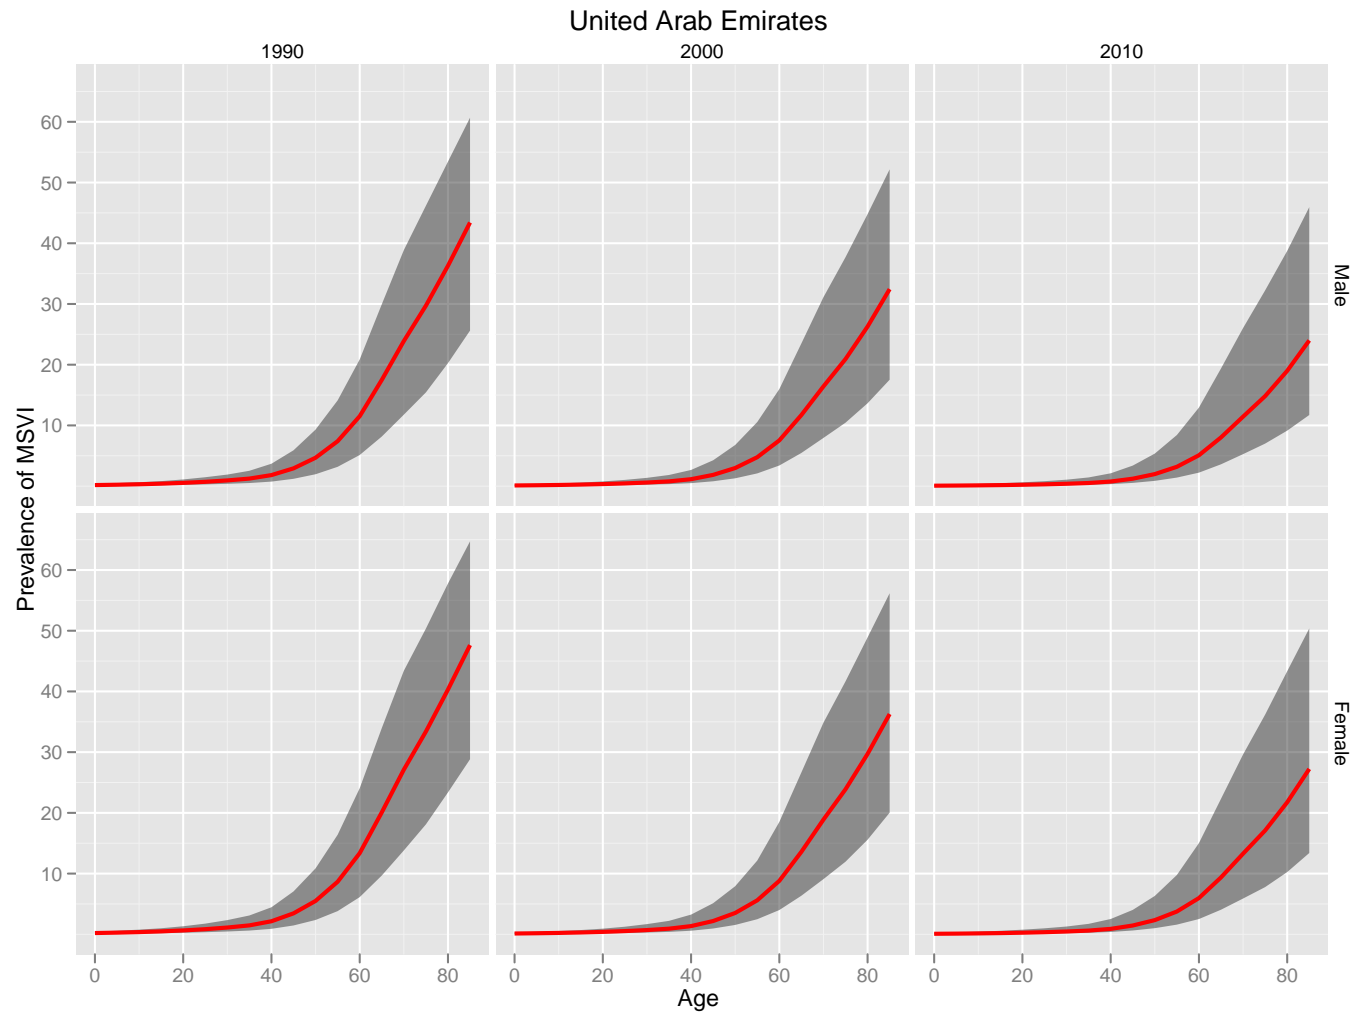

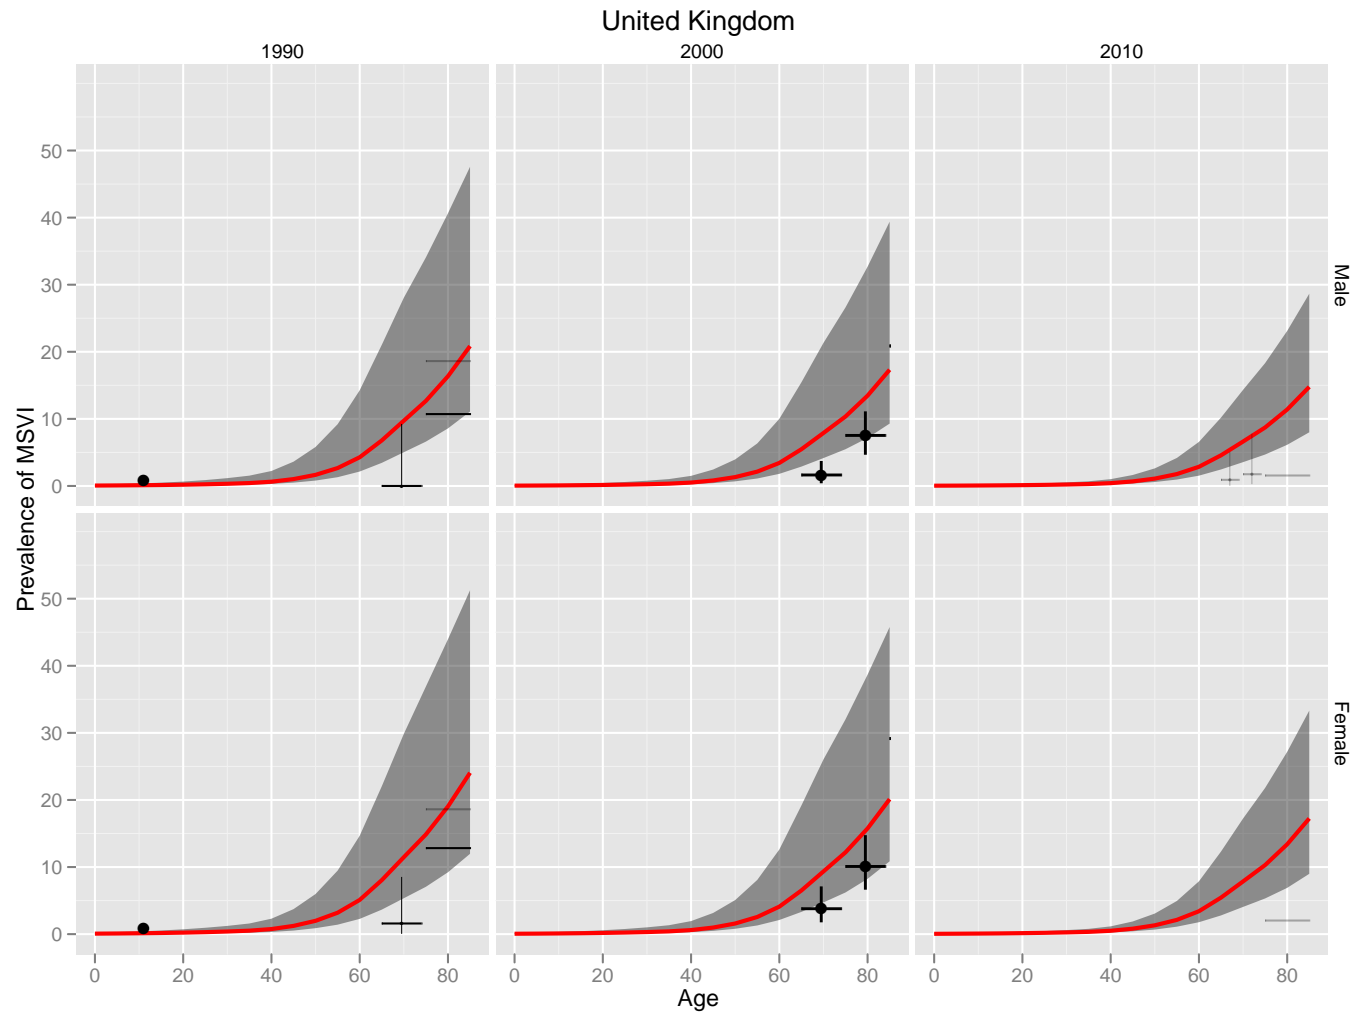

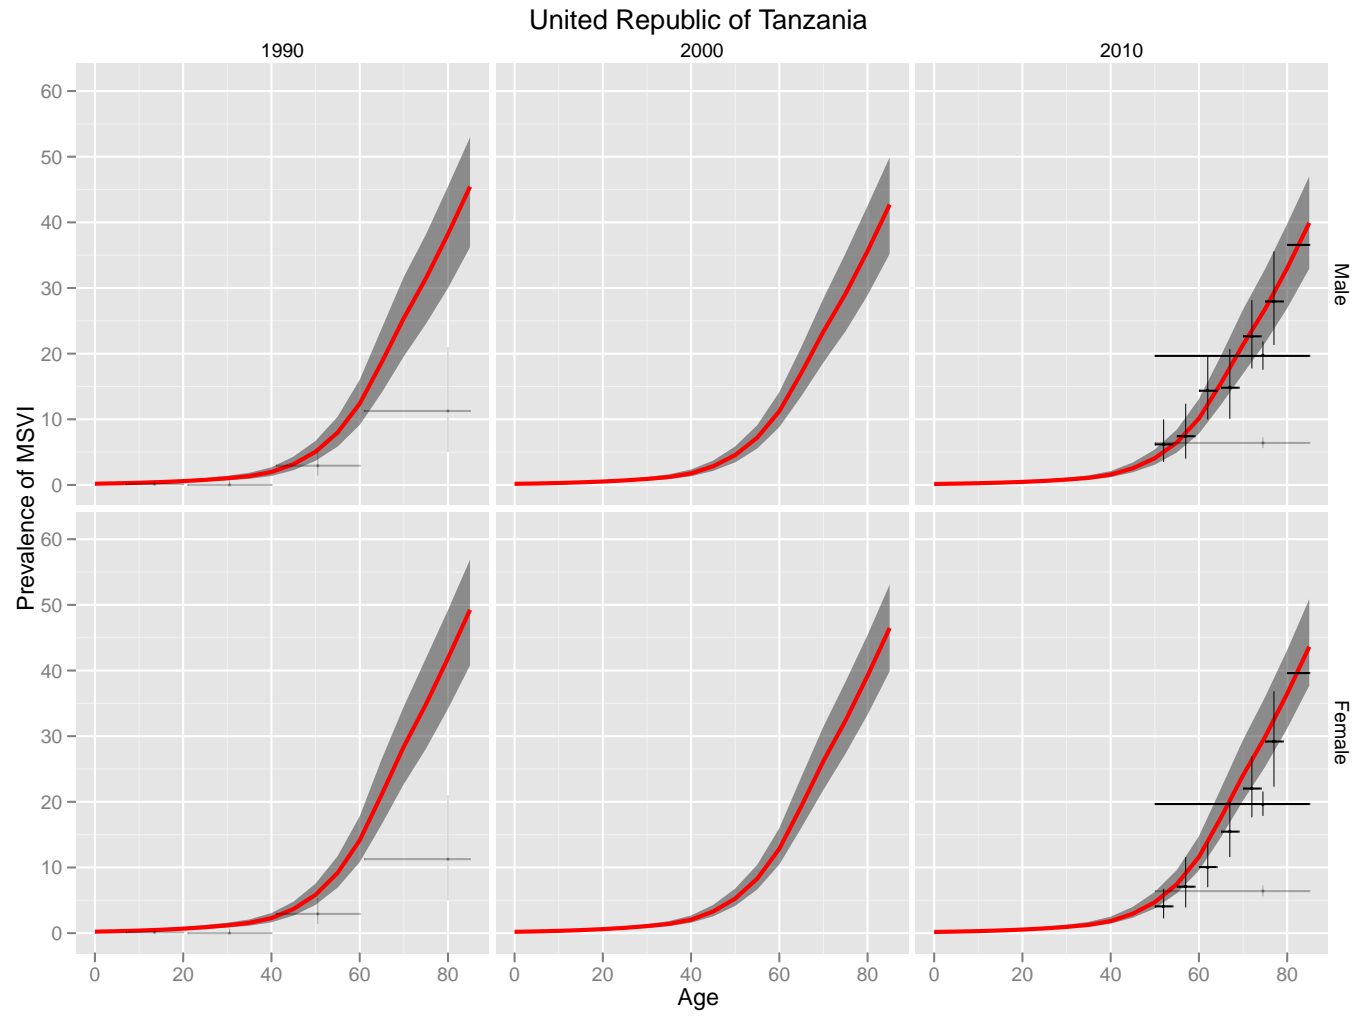

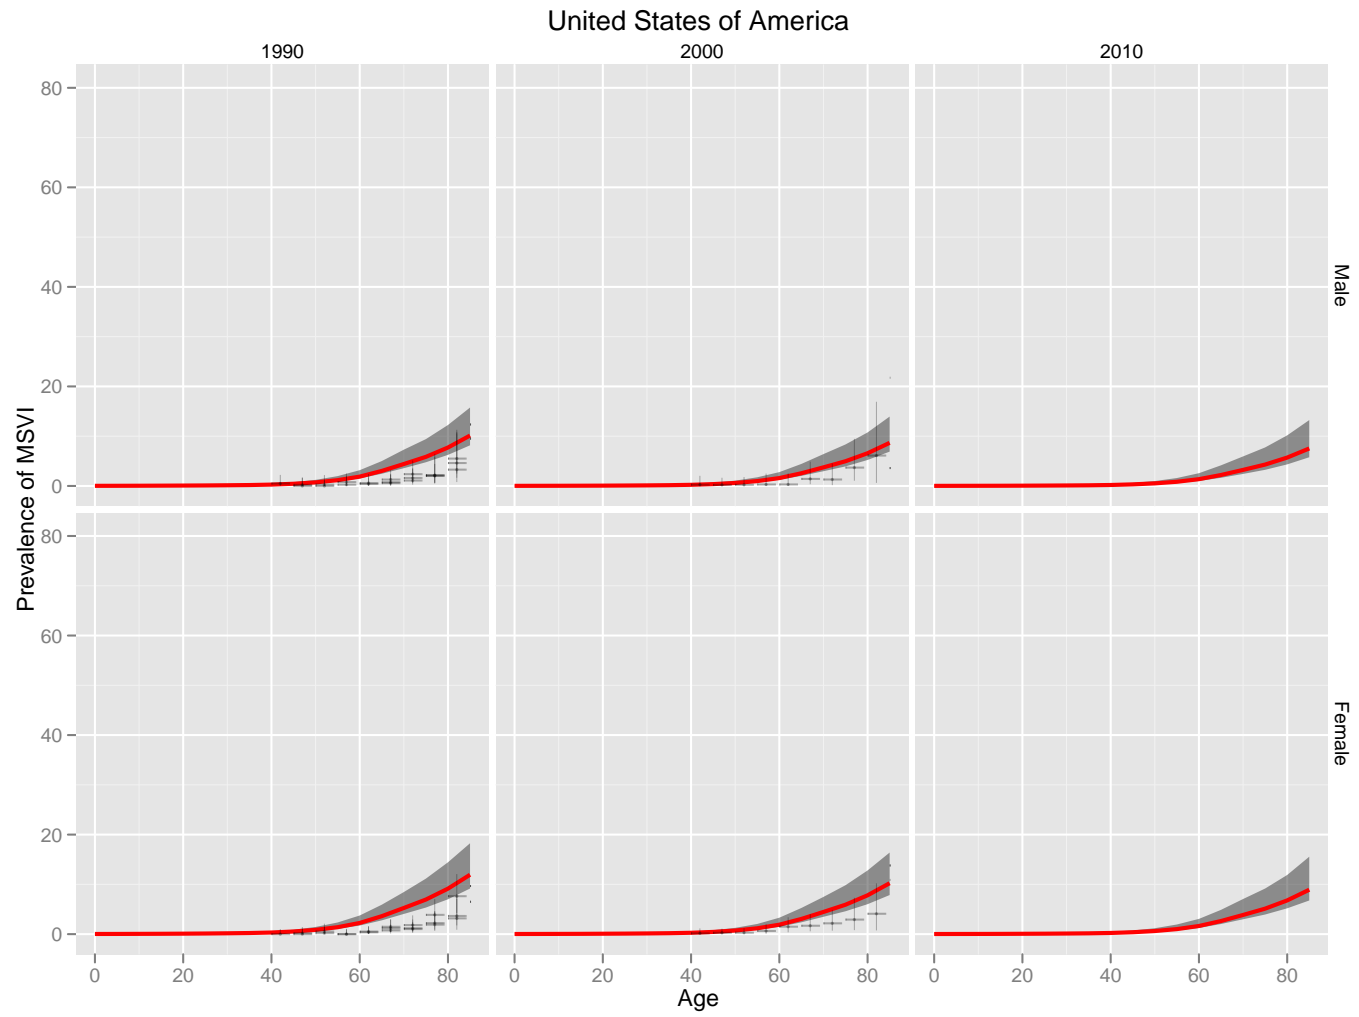



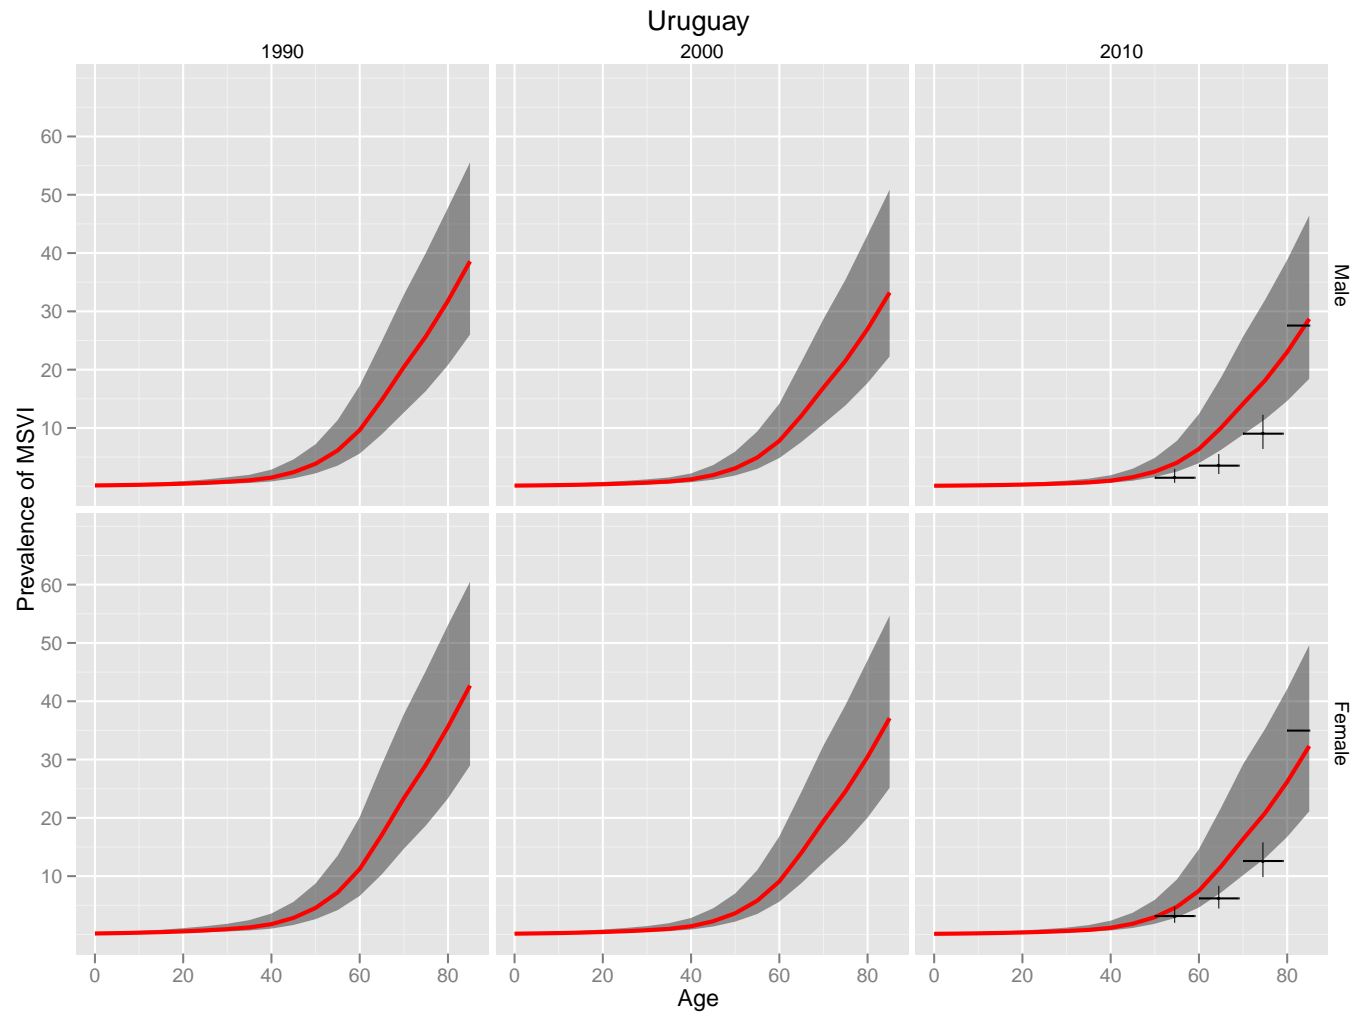

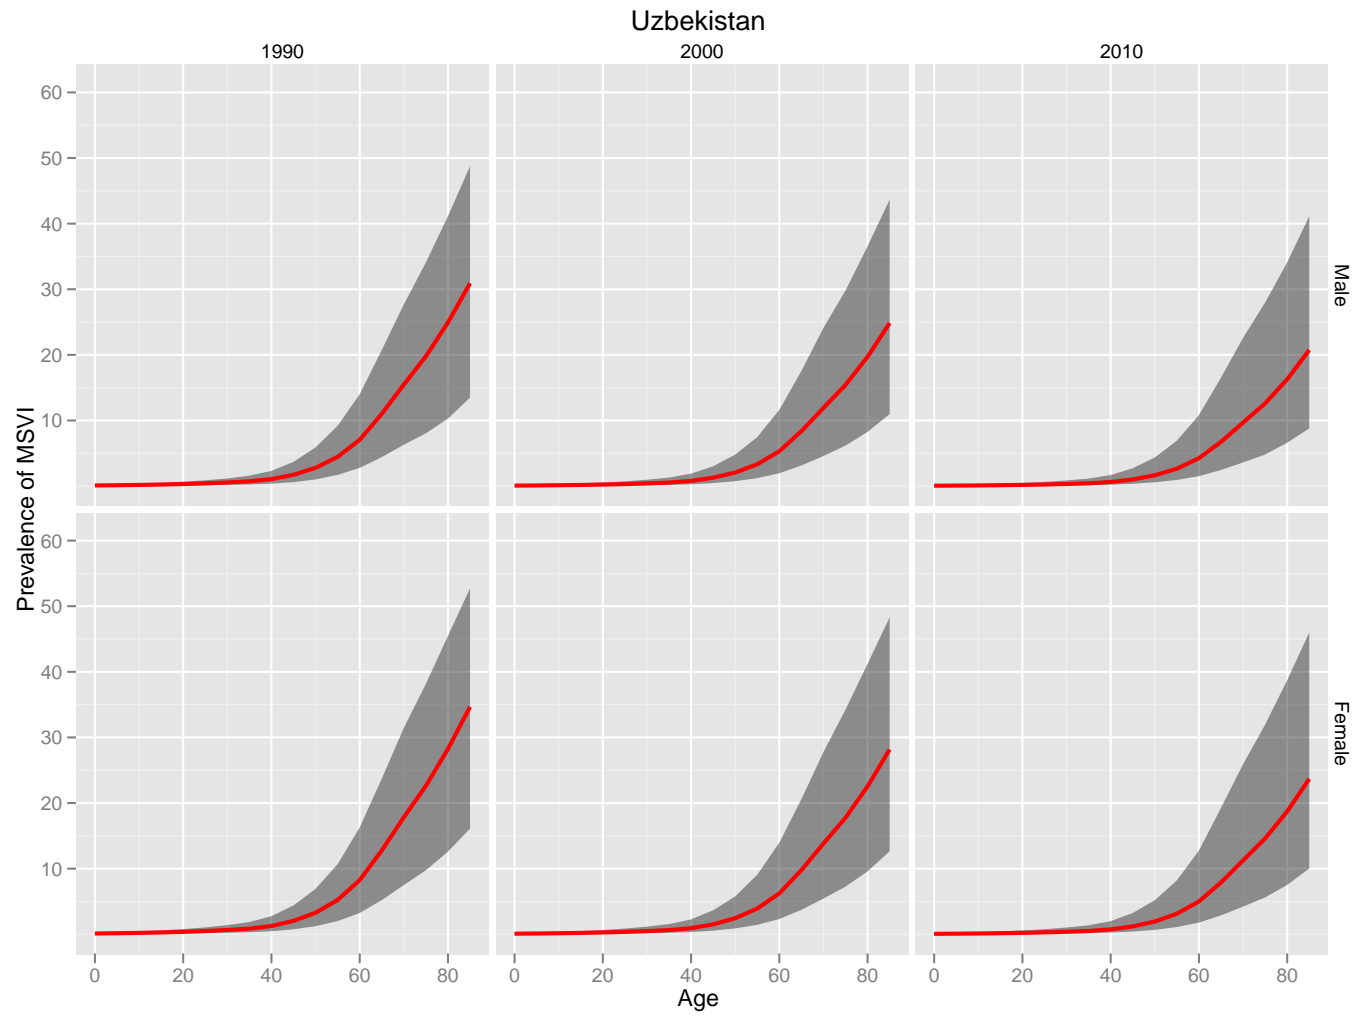

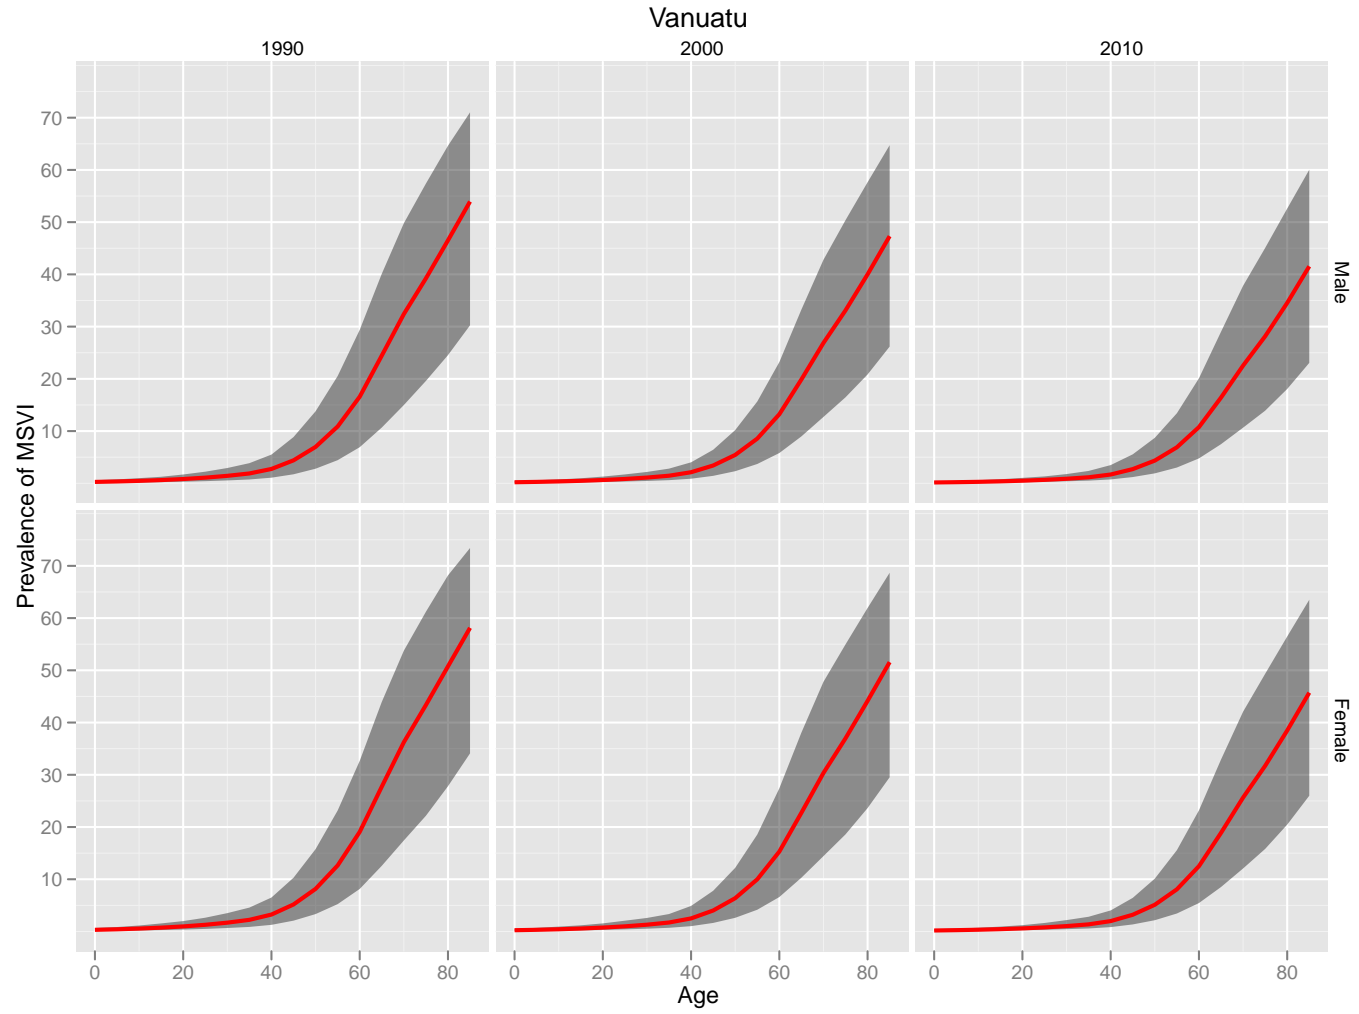

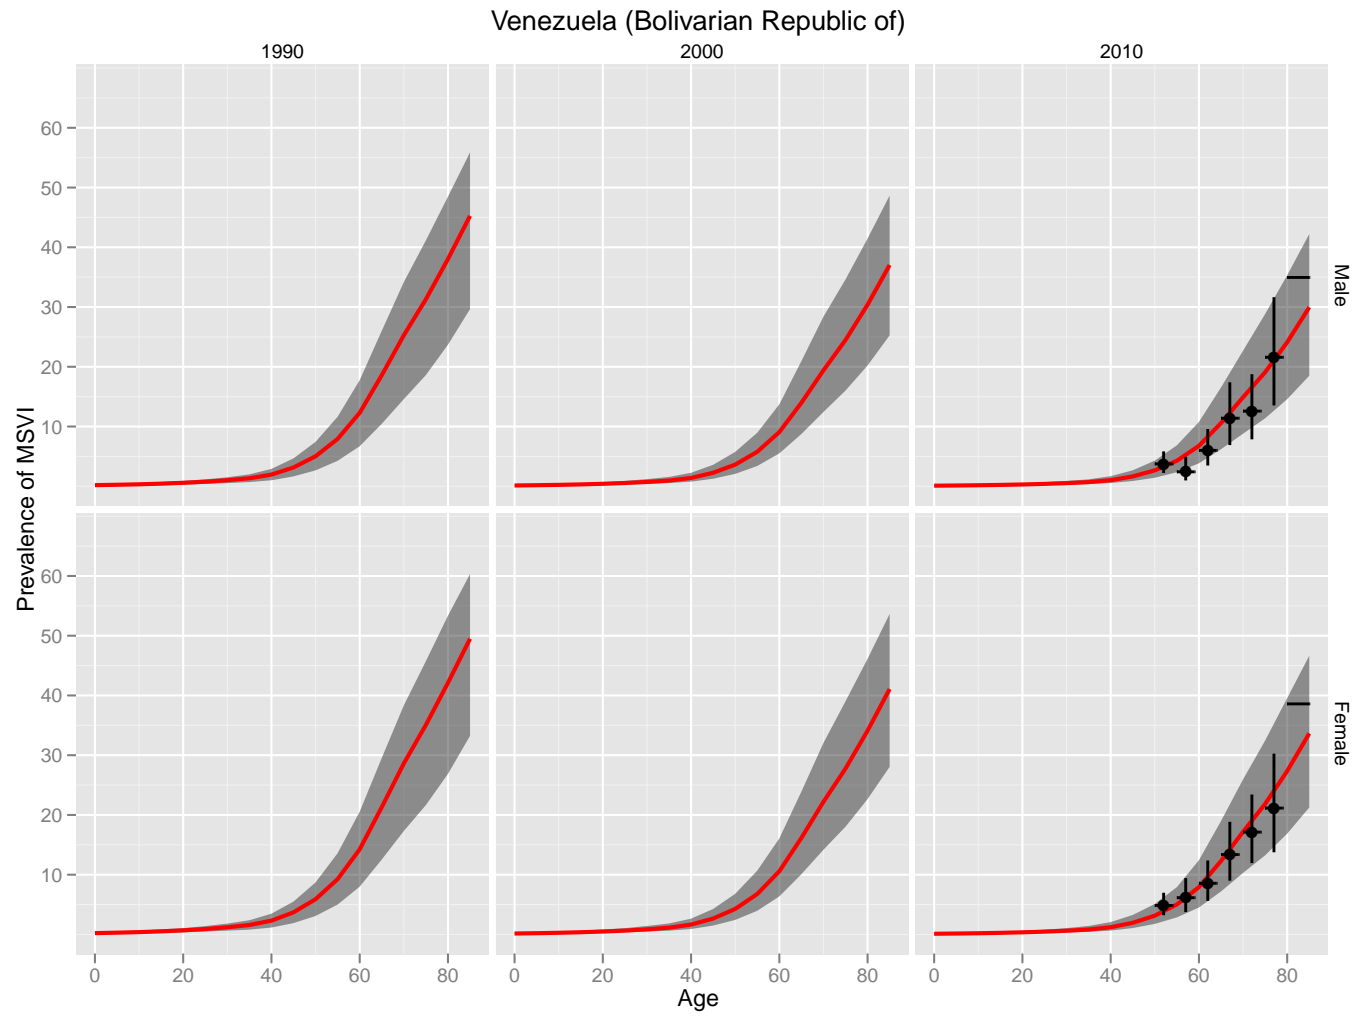

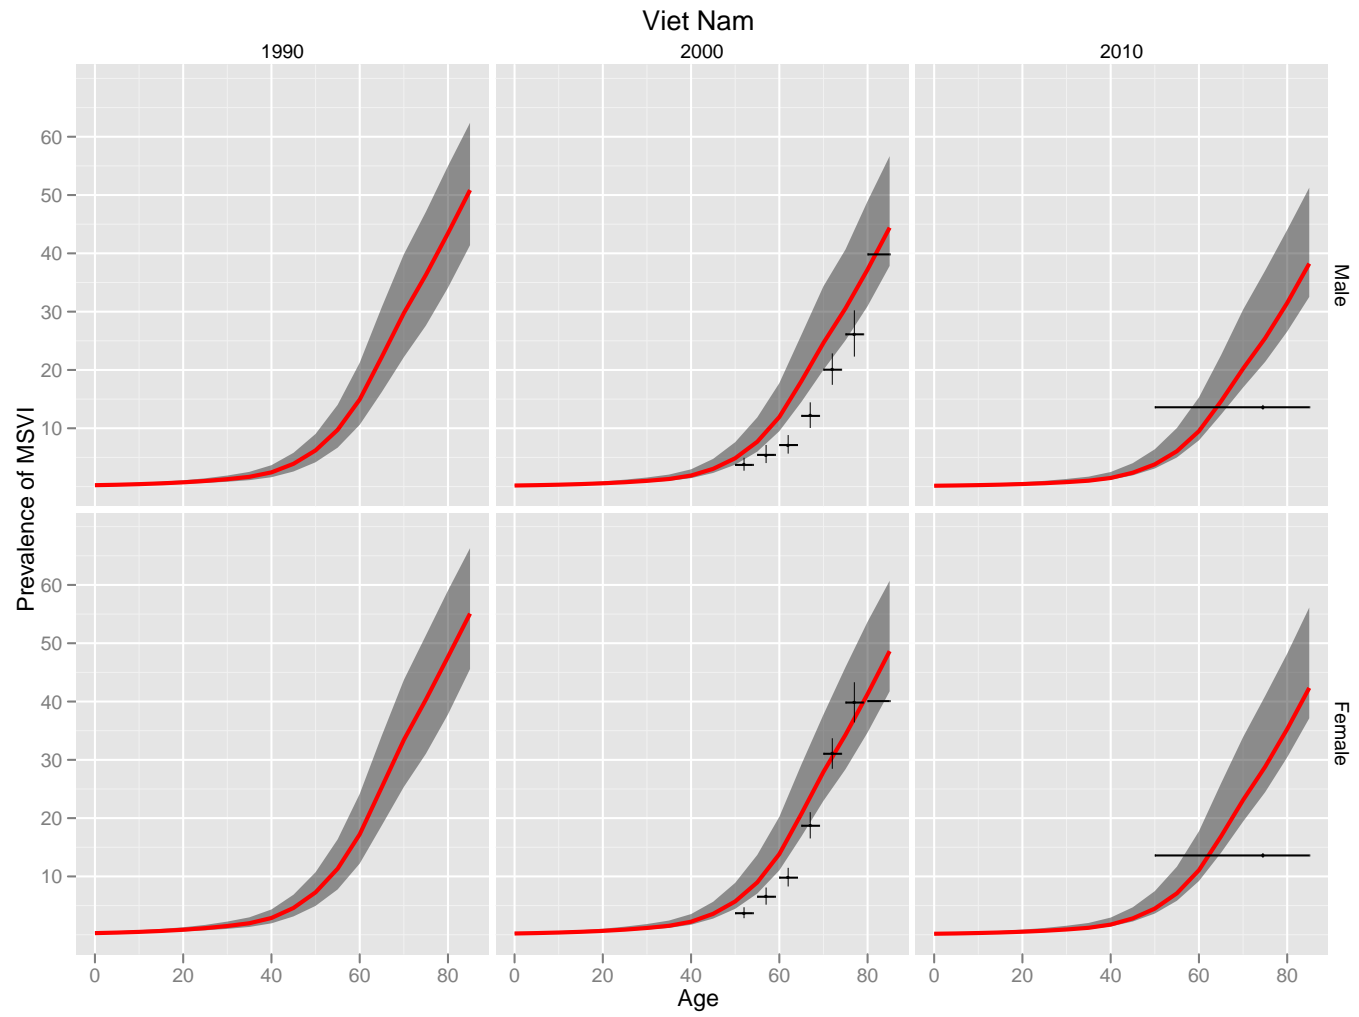

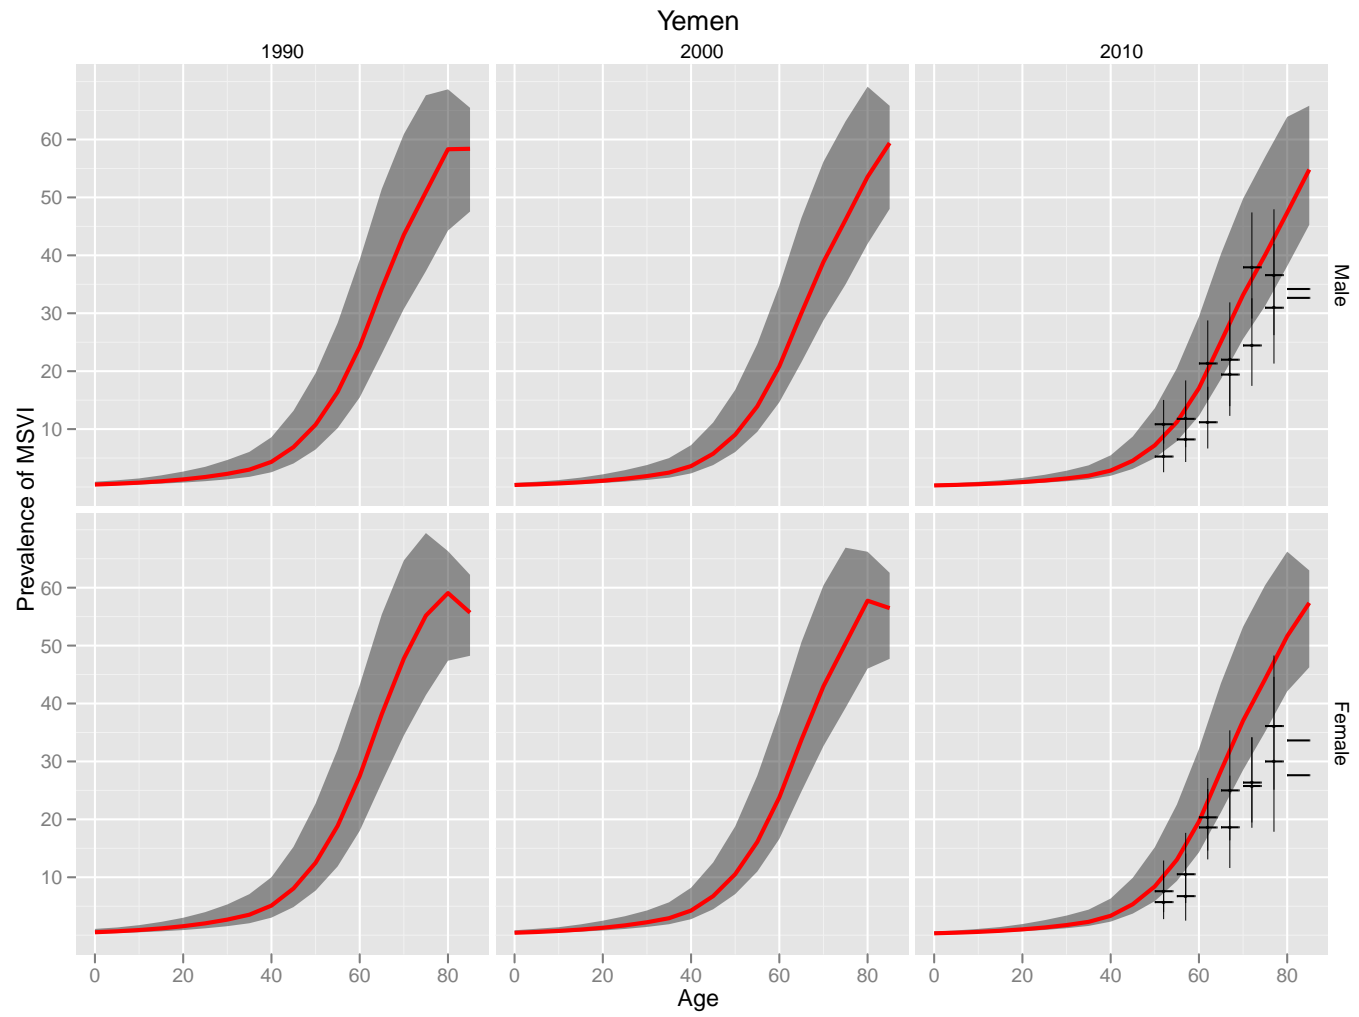

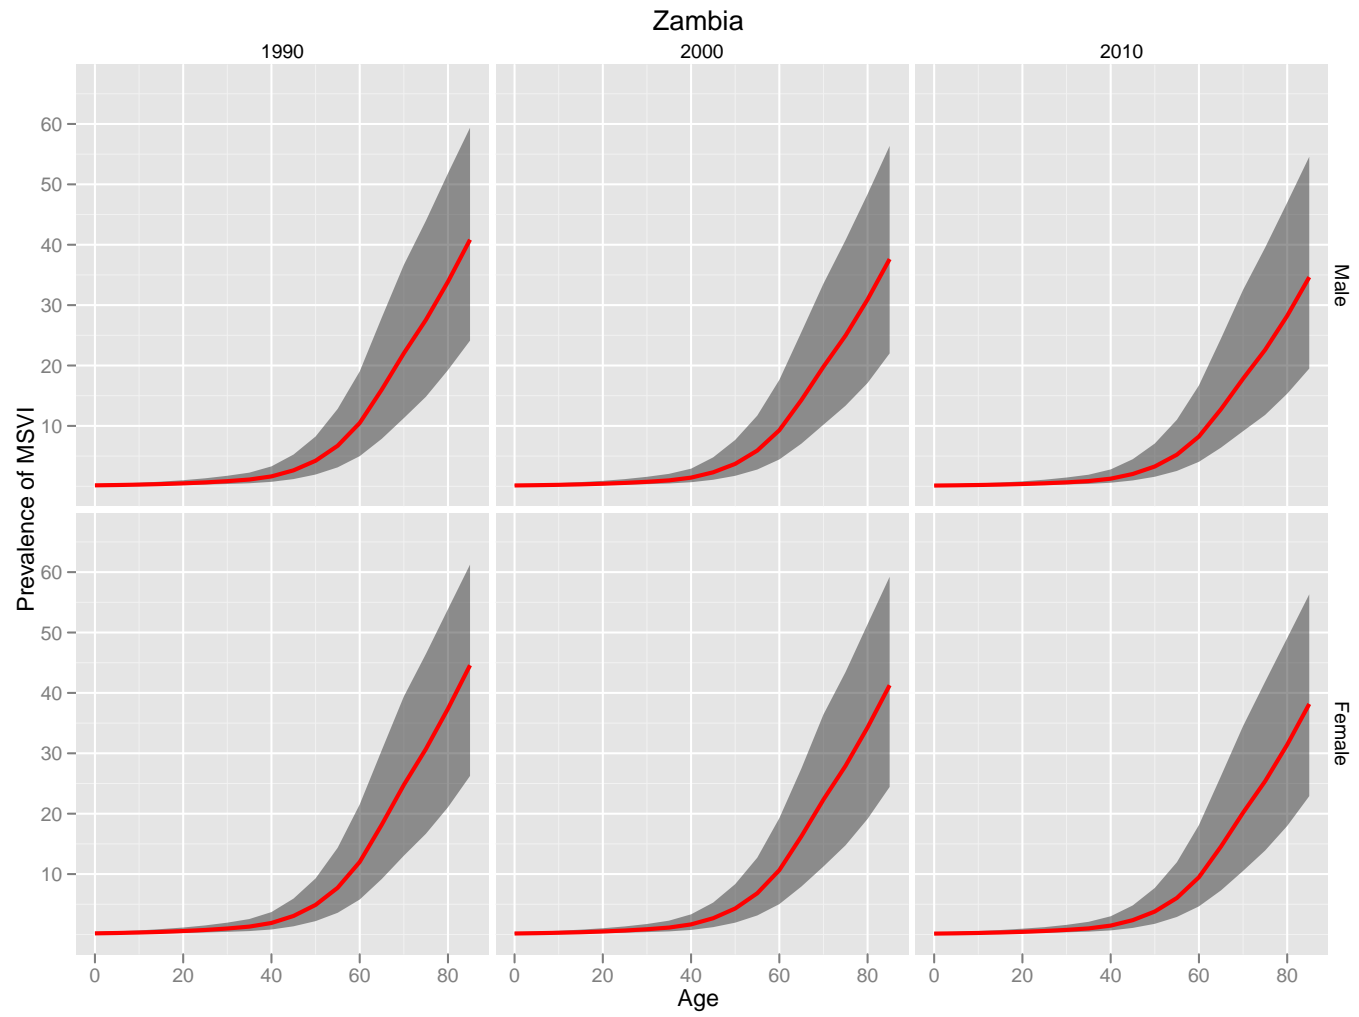

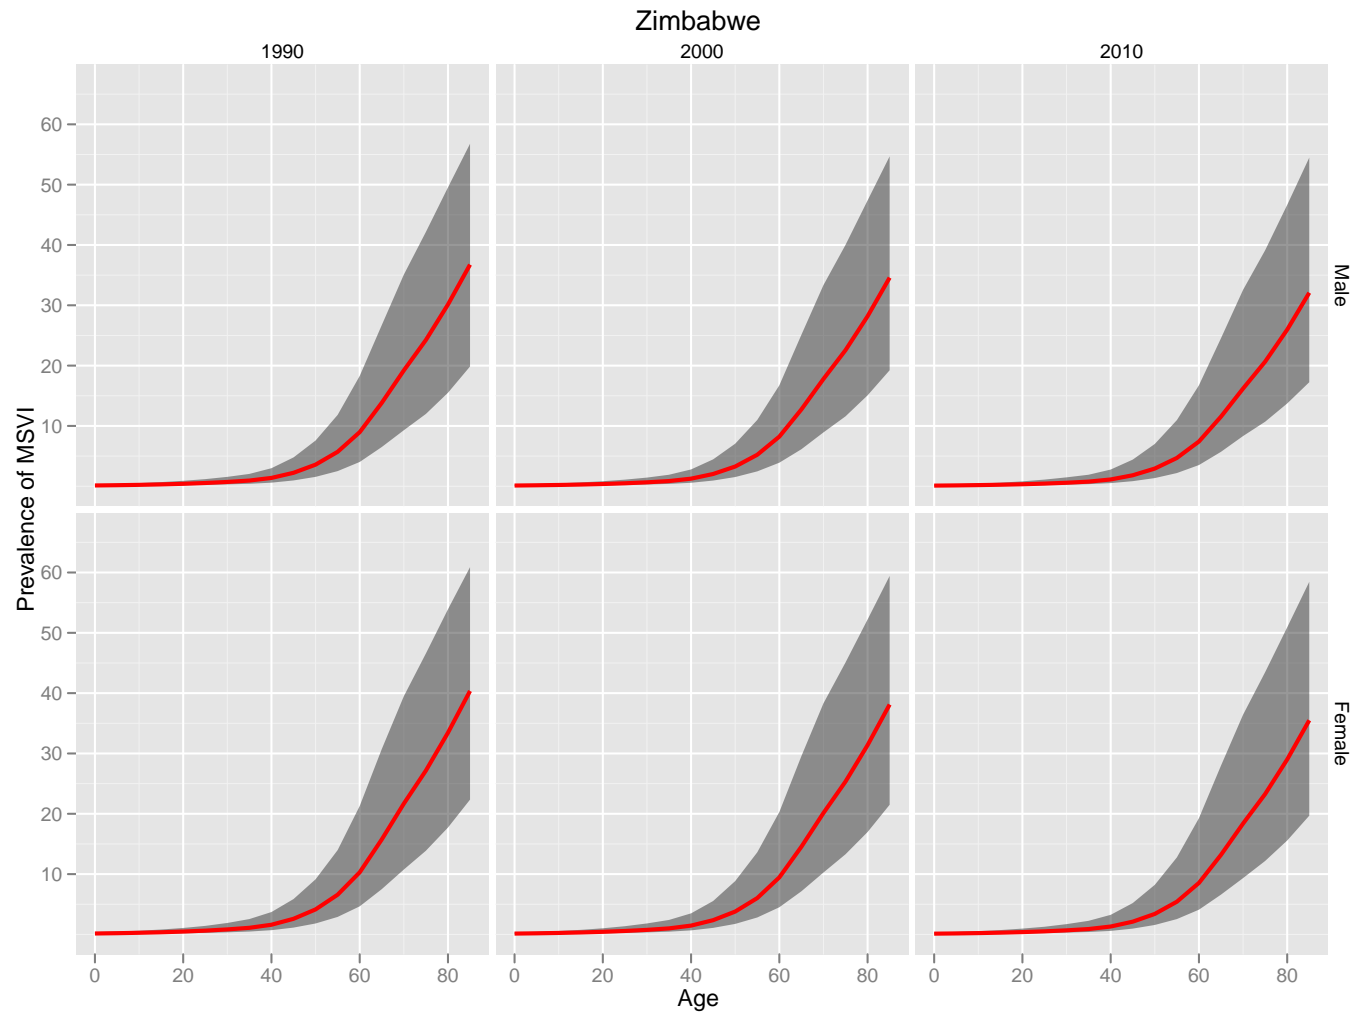

Supplement: pone.0162229.s003.pdf [file pone.0162229.s003.pdf]
